# Supplementary material
Source: Research Square preprint supplement (doi:10.21203/rs.3.rs-8894562/v1)
Supplement: Supplementary file 1 [file 0b4e025ee113b1de918c6173.xlsx]

## Sheet: status
Filename	X	Y	Z	Binding-type
ALX4	0	15	0	tethered-binding
ARGFX	0	412	0	tethered-binding
ARID5B	0	232	0	tethered-binding
BAZ2A	0	250	0	tethered-binding
BHLHA15	148	28	271	cobinding
CEBPD	166	57	121	cobinding
CEBPG	285	18	140	cobinding
CPHXL	11	417	19	tethered-binding
CPHXL2	0	282	0	tethered-binding
CREB1	0	208	0	tethered-binding
CRX	177	85	94	cobinding
DLX3	118	105	93	cobinding
DPRX	168	39	76	cobinding
DUX4	276	0	223	cobinding
DUXA	172	23	274	cobinding
DUXB	15	142	34	tethered-binding
E2F1	0	170	328	cobinding
E2F3	0	156	0	tethered-binding
EGR2	487	0	13	cobinding
EGR3	35	1	46	cobinding
EHF	25	68	400	cobinding
ELF1	107	11	376	cobinding
ELF2	121	36	330	cobinding
ELF3	3	313	180	tethered-binding
ELF4	59	7	434	cobinding
ELF5	31	115	331	cobinding
ELK1	47	61	387	cobinding
ELK3	19	13	468	cobinding
ELK4	13	29	456	cobinding
ERF	40	89	327	cobinding
ERG	28	30	431	cobinding
ESR1	294	30	91	cobinding
ETS1	405	7	56	cobinding
ETS2	228	60	42	cobinding
ETV1	0	465	0	tethered-binding
ETV2	124	27	339	cobinding
ETV3	49	17	430	cobinding
ETV3L	0	156	0	tethered-binding
ETV4	2	39	459	cobinding
ETV5	12	50	430	cobinding
ETV6	0	16	0	tethered-binding
ETV7	62	69	352	cobinding
FEV	13	33	453	cobinding
FIGLA	11	90	380	cobinding
FLI1	50	22	426	cobinding
FOS	364	1	129	cobinding
FOXA1	0	210	0	tethered-binding
FOXA3	249	28	95	cobinding
FOXI1	226	53	162	cobinding
FOXJ2	113	168	114	tethered-binding
FOXJ3	169	84	47	cobinding
FOXL1	170	80	139	cobinding
FOXO1	0	393	0	tethered-binding
FOXQ1	54	289	63	tethered-binding
GABPA	97	2	398	cobinding
GABPB1	0	12	0	tethered-binding
GATA1	0	312	0	tethered-binding
GATA2	161	72	102	cobinding
GATA3	0	495	0	tethered-binding
GATA4	165	90	97	cobinding
GCM1	0	489	0	tethered-binding
GCM2	0	28	0	tethered-binding
GLI2	427	0	48	cobinding
GLI3-CL	10	263	215	tethered-binding
GLI3-FL	99	35	349	cobinding
GPBP1L1	0	21	0	tethered-binding
HES7	10	41	11	tethered-binding
HNF1A	217	47	170	cobinding
HNF1B	329	18	84	cobinding
HNF4A	106	61	314	cobinding
HOXA1	188	41	24	cobinding
HOXA10	172	70	117	cobinding
HOXA11	239	30	54	cobinding
HOXA13	171	92	85	cobinding
HOXA2	20	134	18	tethered-binding
HOXA3	11	289	42	tethered-binding
HOXA4	0	177	0	tethered-binding
HOXA5	89	181	46	tethered-binding
HOXA9	5	419	41	tethered-binding
HOXB13	323	8	69	cobinding
HOXB2	0	362	0	tethered-binding
HOXD12	95	166	93	tethered-binding
HSF1	0	15	0	tethered-binding
HSF4	159	46	233	cobinding
IRF1	160	1	338	cobinding
IRF3	0	499	0	tethered-binding
IRF4	0	494	0	tethered-binding
IRF5	0	499	0	tethered-binding
IRF8	36	266	182	tethered-binding
IRF9	56	254	146	tethered-binding
ISX	0	270	0	tethered-binding
JAZF1	152	14	56	cobinding
KLF10	372	0	128	cobinding
KLF12	481	0	19	cobinding
KLF15	460	0	40	cobinding
KLF16	475	0	25	cobinding
KLF3	499	0	0	cobinding
KLF4	2	10	488	cobinding
KLF5	355	3	132	cobinding
KLF6	418	3	64	cobinding
KLF8	476	0	24	cobinding
KLF9	478	0	22	cobinding
LEUTX	0	106	0	tethered-binding
LHX1	0	333	0	tethered-binding
LHX2	88	154	108	tethered-binding
LHX3	21	302	78	tethered-binding
LHX4	84	228	59	tethered-binding
LHX6	153	101	47	cobinding
LHX8	0	347	0	tethered-binding
MAX	0	423	0	tethered-binding
MEF2A	0	221	0	tethered-binding
MYB	28	220	192	tethered-binding
MYC	0	380	0	tethered-binding
MYOD1	318	0	180	cobinding
MYSM1	0	21	0	tethered-binding
NFATC3	0	479	0	tethered-binding
NFATC4	0	364	0	tethered-binding
NFIA	152	32	282	cobinding
NFIB	263	42	108	cobinding
NFIC	151	24	294	cobinding
NFIX	353	6	109	cobinding
NFKB1	70	5	424	cobinding
NFYA	0	16	0	tethered-binding
NFYC	48	16	436	cobinding
NKX2-5	160	30	53	cobinding
NR2F6	8	61	18	tethered-binding
OTX2	0	179	0	tethered-binding
PAX2	6	346	80	tethered-binding
PAX6	162	69	38	cobinding
PAX7	5	364	40	tethered-binding
PAX8	44	47	47	tethered-binding
PAX9	19	155	65	tethered-binding
PBX4	44	32	48	cobinding
PDX1	29	336	55	tethered-binding
PITX1	0	442	0	tethered-binding
POU2F1	171	27	146	cobinding
POU5F1	15	101	58	tethered-binding
PPARG	44	248	124	tethered-binding
PRDM1	471	0	0	cobinding
RFX1	147	7	330	cobinding
RFX2	389	1	71	cobinding
RFX3	44	207	131	tethered-binding
RFX4	0	470	0	tethered-binding
RFX5	0	375	0	tethered-binding
RFX6	276	41	113	cobinding
RFX8	0	246	0	tethered-binding
RREB1	125	24	340	cobinding
RXRA	5	239	55	tethered-binding
SATB1	0	486	0	tethered-binding
SATB2	0	481	0	tethered-binding
SIX4	16	54	52	tethered-binding
SIX5	0	12	0	tethered-binding
SKIL	0	460	0	tethered-binding
SMAD1	0	441	0	tethered-binding
SMAD5	0	192	0	tethered-binding
SOX10	171	84	217	cobinding
SOX15	29	322	84	tethered-binding
SOX17	126	99	202	cobinding
SOX2	110	153	111	tethered-binding
SOX4	0	491	0	tethered-binding
SOX5	4	398	59	tethered-binding
SOX6	1	401	89	tethered-binding
SOX9	146	84	236	cobinding
SP1	500	0	0	cobinding
SP7	315	42	34	cobinding
SPDEF	138	109	202	cobinding
SPI1	120	84	246	cobinding
SPIB	106	108	253	cobinding
SPIC	35	30	420	cobinding
SPZ1	0	496	0	tethered-binding
STAT1	0	79	0	tethered-binding
STAT3	0	494	0	tethered-binding
STAT4	0	496	0	tethered-binding
STAT5A	0	428	0	tethered-binding
STAT5B	0	500	0	tethered-binding
TBXT	292	24	67	cobinding
TBR1	77	129	81	tethered-binding
TBX21	0	265	0	tethered-binding
TCF3	0	310	0	tethered-binding
TEAD1	47	109	323	cobinding
TEAD2	23	139	330	cobinding
TEAD3	0	398	0	tethered-binding
TEAD4	126	99	206	cobinding
TFAP2A	51	54	383	cobinding
TFAP2C	168	72	123	cobinding
TFAP4	0	155	0	tethered-binding
TLX1	14	141	17	tethered-binding
TLX2	13	279	16	tethered-binding
TLX3	57	220	71	tethered-binding
TPRX1	9	282	38	tethered-binding
TPRX2	115	76	201	cobinding
USF1	0	351	0	tethered-binding
VSX1	220	42	114	cobinding
XBP1	24	140	57	tethered-binding
YY1	490	0	0	cobinding
ZBTB1	28	0	0	cobinding
ZBTB33	17	0	0	cobinding
ZBTB38	22	0	0	cobinding
ZBTB7B	87	37	40	cobinding
ZBTB9	0	0	0	tethered-binding
ZGPAT	49	60	25	tethered-binding
ZHX2	0	370	0	tethered-binding
ZIC3	475	3	15	cobinding
ZNF200	45	139	33	tethered-binding
ZNF263	500	0	0	cobinding
ZNF808	7	9	478	cobinding

## Sheet: Binding Type
TF1	TF1_TF2	TF2_Correct name	Binding-type								Overlap with PPI	Binding-type	Detected
ALX4	ALX4_ZNF502	ZNF502	tethered-binding								ELF1_SP1	cobinding	BioID
ALX4	ALX4_ZNF502	ZNF502	tethered-binding								ELF2_ZNF143	cobinding	BioID
ALX4	ALX4_ZNF502	ZNF502	tethered-binding								ELF4_SP2	cobinding	BioID
ALX4	ALX4_ZNF502	ZNF502	tethered-binding								ELK1_SP1	cobinding	BioID
ALX4	ALX4_ZNF502	ZNF502	tethered-binding								FOXJ2_RREB1	tethered-binding	BioID
ARGFX	ARGFX_MEF2A	MEF2A	tethered-binding								GABPA_ZNF143	cobinding	BioID
ARGFX	ARGFX_ZNF770	ZNF770	tethered-binding								HOXD12_NFIC	tethered-binding	BioID
ARGFX	ARGFX_HEY2	HEY2	tethered-binding								HSF4_MAZ	cobinding	BioID
ARGFX	ARGFX_ZNF93	ZNF93	tethered-binding								MAX_SP2	tethered-binding	BioID
ARID5B	ARID5B_MEF2A	MEF2A	tethered-binding								MYC_MAX	tethered-binding	AP-MS and BioID
ARID5B	ARID5B_ZNF770	ZNF770	tethered-binding								NFIC_SP1	cobinding	BioID
ARID5B	ARID5B_PITX2	PITX2	tethered-binding								NFYC_SP2	cobinding	BioID
ARID5B	ARID5B_Gli1	Gli1	tethered-binding								RFX3_SP2	tethered-binding	BioID
ARID5B	ARID5B_ZNF135	ZNF135	tethered-binding								SPI1_BCL11A	cobinding	BioID
BAZ2A	BAZ2A_ZNF460	ZNF460	tethered-binding								TLX3_NFIC	tethered-binding	BioID
BAZ2A	BAZ2A_ZNF135	ZNF135	tethered-binding
BAZ2A	BAZ2A_TBX4	TBX4	tethered-binding
BAZ2A	BAZ2A_ZNF121	ZNF121	tethered-binding
BAZ2A	BAZ2A_MEF2A	MEF2A	tethered-binding
BHLHA15	BHLHA15_ZBTB18	ZBTB18	cobinding
BHLHA15	BHLHA15_TEAD1	TEAD1	cobinding
BHLHA15	BHLHA15_HOXA13	HOXA13	cobinding
CEBPD	CEBPD_ZSCAN31	ZSCAN31	cobinding
CEBPD	CEBPD_ZNF770	ZNF770	cobinding
CEBPD	CEBPD_CPEB1	CPEB1	cobinding
CEBPD	CEBPD_ZNF135	ZNF135	cobinding
CEBPG	CEBPG_ZNF460	ZNF460	cobinding
CEBPG	CEBPG_ZNF460	ZNF460	cobinding
CEBPG	CEBPG_ZNF384	ZNF384	cobinding
CPHXL	CPHXL_PATZ1	PATZ1	tethered-binding
CPHXL	CPHXL_FOXD3	FOXD3	tethered-binding
CPHXL	CPHXL_SP4	SP4	tethered-binding
CPHXL2	CPHXL2_MEF2A	MEF2A	tethered-binding
CPHXL2	CPHXL2_ZNF770	ZNF770	tethered-binding
CPHXL2	CPHXL2_NR5A1	NR5A1	tethered-binding
CPHXL2	CPHXL2_ZFX	ZFX	tethered-binding
CPHXL2	CPHXL2_FOXL1	FOXL1	tethered-binding
CREB1	CREB1_MEF2A	MEF2A	tethered-binding
CREB1	CREB1_THA	THA	tethered-binding
CREB1	CREB1_ZNF770	ZNF770	tethered-binding
CRX	CRX_ZNF770	ZNF770	cobinding
CRX	CRX_NR5A1	NR5A1	cobinding
CRX	CRX_FOS	FOS	cobinding
CRX	CRX_RHOXF1	RHOXF1	cobinding
DLX3	DLX3_HEY2	HEY2	cobinding
DLX3	DLX3_ZSCAN31	ZSCAN31	cobinding
DLX3	DLX3_ZNF770	ZNF770	cobinding
DLX3	DLX3_NFIC	NFIC	cobinding
DPRX	DPRX_ZNF770	ZNF770	cobinding
DPRX	DPRX_NR5A1	NR5A1	cobinding
DPRX	DPRX_CPEB1	CPEB1	cobinding
DUX4	DUX4_FOXO3	FOXO3	cobinding
DUX4	DUX4_ZN264	ZN264	cobinding
DUX4	DUX4_SP1	SP1	cobinding
DUXA	DUXA_PAX5	PAX5	cobinding
DUXA	DUXA_ZNF770	ZNF770	cobinding
DUXA	DUXA_ZBTB33	ZBTB33	cobinding
DUXB	DUXB_MEF2A	MEF2A	tethered-binding
DUXB	DUXB_ZNF121	ZNF121	tethered-binding
DUXB	DUXB_ZNF770	ZNF770	tethered-binding
DUXB	DUXB_THAP1	THAP1	tethered-binding
E2F1	E2F1_THAP11	THAP11	cobinding
E2F1	E2F1_SP2	SP2	cobinding
E2F1	E2F1_NFYB	NFYB	cobinding
E2F3	E2F3_CPEB1	CPEB1	tethered-binding
E2F3	E2F3_PITX2	PITX2	tethered-binding
E2F3	E2F3_NR5A1	NR5A1	tethered-binding
E2F3	E2F3_THAP1	THAP1	tethered-binding
E2F3	E2F3_ZNF460	ZNF460	tethered-binding
EGR2	EGR2_CPEB1	CPEB1	cobinding
EGR3	EGR3_HSF1	HSF1	cobinding
EHF	EHF_CPEB1	CPEB1	cobinding
EHF	EHF_PATZ1	PATZ1	cobinding
EHF	EHF_VEZF1	VEZF1	cobinding
EHF	EHF_CTCFL	CTCFL	cobinding
ELF1	ELF1_ZNF143	ZNF143	cobinding
ELF1	ELF1_SP1	SP1	cobinding
ELF1	ELF1_BCL11A	BCL11A	cobinding
ELF2	ELF2_ZNF143	ZNF143	cobinding
ELF2	ELF2_ZNF93	ZNF93	cobinding
ELF3	ELF3_SP1	SP1	tethered-binding
ELF3	ELF3_CTCFL	CTCFL	tethered-binding
ELF3	ELF3_PRDM6	PRDM6	tethered-binding
ELF3	ELF3_Nrf1	Nrf1	tethered-binding
ELF4	ELF4_ZNF76	ZNF76	cobinding
ELF4	ELF4_SP2	SP2	cobinding
ELF4	ELF4_ZNF263	ZNF263	cobinding
ELF5	ELF5_CPEB1	CPEB1	cobinding
ELF5	ELF5_PATZ1	PATZ1	cobinding
ELF5	ELF5_FOXC2	FOXC2	cobinding
ELK1	ELK1_THAP11	THAP11	cobinding
ELK1	ELK1_ZNF93	ZNF93	cobinding
ELK1	ELK1_SP1	SP1	cobinding
ELK3	ELK3_SP1	SP1	cobinding
ELK3	ELK3_ZNF93	ZNF93	cobinding
ELK3	ELK3_CPEB1	CPEB1	cobinding
ELK4	ELK4_SP1	SP1	cobinding
ELK4	ELK4_ZNF93	ZNF93	cobinding
ELK4	ELK4_CPEB1	CPEB1	cobinding
ELK4	ELK4_THAP11	THAP11	cobinding
ERF	ERF_PATZ1	PATZ1	cobinding
ERF	ERF_FOXL1	FOXL1	cobinding
ERF	ERF_ZNF93	ZNF93	cobinding
ERG	ERG_MAZ	MAZ	cobinding
ERG	ERG_PITX2	PITX2	cobinding
ESR1	ESR1_ZNF770	ZNF770	cobinding
ESR1	ESR1_CPEB1	CPEB1	cobinding
ESR1	ESR1_THAP	THAP	cobinding
ETS1	ETS1_CPEB1	CPEB1	cobinding
ETS2	ETS2_ZNF770	ZNF770	cobinding
ETS2	ETS2_ZNF384	ZNF384	cobinding
ETS2	ETS2_NR5A1	NR5A1	cobinding
ETV1	ETV1_NRF1	NRF1	tethered-binding
ETV1	ETV1_ZNF384	ZNF384	tethered-binding
ETV1	ETV1_MAZ	MAZ	tethered-binding
ETV1	ETV1_ZNF143	ZNF143	tethered-binding
ETV1	ETV1_ZNF93	ZNF93	tethered-binding
ETV2	ETV2_ZNF467	ZNF467	cobinding
ETV2	ETV2_SP1	SP1	cobinding
ETV3	ETV3_SP1	SP1	cobinding
ETV3	ETV3_ZNF143	ZNF143	cobinding
ETV3	ETV3_ZNF93	ZNF93	cobinding
ETV3L	ETV3L_ZNF460	ZNF460	tethered-binding
ETV3L	ETV3L_NR5A1	NR5A1	tethered-binding
ETV3L	ETV3L_HEY2	HEY2	tethered-binding
ETV3L	ETV3L_MEF2A	MEF2A	tethered-binding
ETV3L	ETV3L_ZNF582	ZNF582	tethered-binding
ETV4	ETV4_ZNF93	ZNF93	cobinding
ETV4	ETV4_SP2	SP2	cobinding
ETV4	ETV4_ZNF76	ZNF76	cobinding
ETV4	ETV4_FOXC1	FOXC1	cobinding
ETV5	ETV5_SP2	SP2	cobinding
ETV5	ETV5_ANDR	ANDR	cobinding
ETV5	ETV5_Thap11	Thap11	cobinding
ETV6	ETV6_ZNF502	ZNF502	tethered-binding
ETV6	ETV6_ZNF502	ZNF502	tethered-binding
ETV6	ETV6_ZNF502	ZNF502	tethered-binding
ETV6	ETV6_ZNF502	ZNF502	tethered-binding
ETV6	ETV6_ZNF502	ZNF502	tethered-binding
ETV7	ETV7_VEZF1	VEZF1	cobinding
ETV7	ETV7_SP3	SP3	cobinding
ETV7	ETV7_FOXJ3	FOXJ3	cobinding
FEV	FEV_ZNF93	ZNF93	cobinding
FEV	FEV_CPEB1	CPEB1	cobinding
FEV	FEV_SP3	SP3	cobinding
FIGLA	FIGLA_HTF4	HTF4	cobinding
FIGLA	FIGLA_ZNF770	ZNF770	cobinding
FIGLA	FIGLA_ZNF121	ZNF121	cobinding
FLI1	FLI1_SP3	SP3	cobinding
FLI1	FLI1_ZNF93	ZNF93	cobinding
FLI1	FLI1_CPEB1	CPEB1	cobinding
FOS	FOS_PITX2	PITX2	cobinding
FOS	FOS_THAP	THAP	cobinding
FOS	FOS_ZNF121	ZNF121	cobinding
FOXA1	FOXA1_PITX2	PITX2	tethered-binding
FOXA1	FOXA1_THAP	THAP	tethered-binding
FOXA1	FOXA1_CPEB1	CPEB1	tethered-binding
FOXA1	FOXA1_THAP1	THAP1	tethered-binding
FOXA3	FOXA3_ZNF692	ZNF692	cobinding
FOXA3	FOXA3_MAZ	MAZ	cobinding
FOXI1	FOXI1_SP1	SP1	cobinding
FOXI1	FOXI1_PITX2	PITX2	cobinding
FOXI1	FOXI1_RREB1	RREB1	cobinding
FOXJ2	FOXJ2_FOSL2::JUND	FOSL2::JUND	tethered-binding
FOXJ2	FOXJ2_RREB1	RREB1	tethered-binding
FOXJ2	FOXJ2_RFX3	RFX3	tethered-binding
FOXJ2	FOXJ2_PATZ1	PATZ1	tethered-binding
FOXJ3	FOXJ3_ZBTB7B	ZBTB7B	cobinding
FOXJ3	FOXJ3_STAT1	STAT1	cobinding
FOXL1	FOXL1_SP1	SP1	cobinding
FOXL1	FOXL1_PITX2	PITX2	cobinding
FOXL1	FOXL1_SP2	SP2	cobinding
FOXL1	FOXL1_Prdm5	Prdm5	cobinding
FOXO1	FOXO1_MEF2A	MEF2A	tethered-binding
FOXO1	FOXO1_ZNF770	ZNF770	tethered-binding
FOXO1	FOXO1_Gli1	Gli1	tethered-binding
FOXQ1	FOXQ1_SP2	SP2	tethered-binding
FOXQ1	FOXQ1_COT1	COT1	tethered-binding
FOXQ1	FOXQ1_SP3	SP3	tethered-binding
FOXQ1	FOXQ1_CDX4	CDX4	tethered-binding
GABPA	GABPA_ZNF143	ZNF143	cobinding
GABPA	GABPA_ZNF93	ZNF93	cobinding
GABPB1	GABPB1_SMCA5	SMCA5	tethered-binding
GABPB1	GABPB1_ZNF502	ZNF502	tethered-binding
GABPB1	GABPB1_ZNF502	ZNF502	tethered-binding
GABPB1	GABPB1_ZNF502	ZNF502	tethered-binding
GATA1	GATA1_HOXB13	HOXB13	tethered-binding
GATA1	GATA1_Zic2	Zic2	tethered-binding
GATA1	GATA1_COE1	COE1	tethered-binding
GATA1	GATA1_Smad4	Smad4	tethered-binding
GATA1	GATA1_ZNF418	ZNF418	tethered-binding
GATA2	GATA2_Smad4	Smad4	cobinding
GATA2	GATA2_GLI2	GLI2	cobinding
GATA2	GATA2_VEZF1	VEZF1	cobinding
GATA2	GATA2_KLF2	KLF2	cobinding
GATA3	GATA3_USF2	USF2	tethered-binding
GATA3	GATA3_SP3	SP3	tethered-binding
GATA3	GATA3_ZNF143	ZNF143	tethered-binding
GATA3	GATA3_FOXL1	FOXL1	tethered-binding
GATA3	GATA3_MAZ	MAZ	tethered-binding
GATA4	GATA4_THAP	THAP	cobinding
GATA4	GATA4_TBX15	TBX15	cobinding
GATA4	GATA4_FOXD3	FOXD3	cobinding
GCM1	GCM1_SP2	SP2	tethered-binding
GCM1	GCM1_CPEB1	CPEB1	tethered-binding
GCM1	GCM1_SP2	SP2	tethered-binding
GCM1	GCM1_ZNF467	ZNF467	tethered-binding
GCM1	GCM1_ZNF384	ZNF384	tethered-binding
GCM2	GCM2_ZNF502	ZNF502	tethered-binding
GCM2	GCM2_ZNF502	ZNF502	tethered-binding
GCM2	GCM2_ZNF502	ZNF502	tethered-binding
GCM2	GCM2_ZNF502	ZNF502	tethered-binding
GCM2	GCM2_ZNF502	ZNF502	tethered-binding
GLI2	GLI2_CPEB1	CPEB1	cobinding
GLI3-CL	GLI3-CL_SP1	SP1	tethered-binding
GLI3-CL	GLI3-CL_FOXL1	FOXL1	tethered-binding
GLI3-CL	GLI3-CL_ZNF341	ZNF341	tethered-binding
GLI3-CL	GLI3-CL_VEZF1	VEZF1	tethered-binding
GLI3-FL	GLI3-FL_CPEB1	CPEB1	cobinding
GLI3-FL	GLI3-FL_PITX2	PITX2	cobinding
GLI3-FL	GLI3-FL_SP2	SP2	cobinding
GLI3-FL	GLI3-FL_THA	THA	cobinding
GPBP1L1	GPBP1L1_ZNF502	ZNF502	tethered-binding
GPBP1L1	GPBP1L1_ZNF502	ZNF502	tethered-binding
GPBP1L1	GPBP1L1_ZNF502	ZNF502	tethered-binding
GPBP1L1	GPBP1L1_ZNF502	ZNF502	tethered-binding
GPBP1L1	GPBP1L1_ZNF502	ZNF502	tethered-binding
HES7	HES7_NR5A1	NR5A1	tethered-binding
HES7	HES7_MEF2A	MEF2A	tethered-binding
HES7	HES7_ZNF770	ZNF770	tethered-binding
HES7	HES7_ZNF502	ZNF502	tethered-binding
HNF1A	HNF1A_MAZ	MAZ	cobinding
HNF1A	HNF1A_KLF9	KLF9	cobinding
HNF1A	HNF1A_CPEB1	CPEB1	cobinding
HNF1B	HNF1B_VEZF1	VEZF1	cobinding
HNF1B	HNF1B_KLF9	KLF9	cobinding
HNF1B	HNF1B_HAND1	HAND1	cobinding
HNF4A	HNF4A_SP1	SP1	cobinding
HNF4A	HNF4A_FOXL1	FOXL1	cobinding
HNF4A	HNF4A_ZBTB17	ZBTB17	cobinding
HNF4A	HNF4A_Foxj3	Foxj3	cobinding
HOXA1	HOXA1_Zic1::Zic2	Zic1::Zic2	cobinding
HOXA10	HOXA10_ZNF467	ZNF467	cobinding
HOXA10	HOXA10_ZNF770	ZNF770	cobinding
HOXA10	HOXA10_ZNF563	ZNF563	cobinding
HOXA11	HOXA11_PPARG	PPARG	cobinding
HOXA11	HOXA11_PATZ1	PATZ1	cobinding
HOXA13	HOXA13_MAZ	MAZ	cobinding
HOXA13	HOXA13_SREBF1	SREBF1	cobinding
HOXA2	HOXA2_ZN524	ZN524	tethered-binding
HOXA2	HOXA2_ZNF76	ZNF76	tethered-binding
HOXA2	HOXA2_CPEB1	CPEB1	tethered-binding
HOXA3	HOXA3_MEF2A	MEF2A	tethered-binding
HOXA3	HOXA3_NR5A1	NR5A1	tethered-binding
HOXA3	HOXA3_ZNF770	ZNF770	tethered-binding
HOXA3	HOXA3_WT1	WT1	tethered-binding
HOXA4	HOXA4_ZNF121	ZNF121	tethered-binding
HOXA4	HOXA4_IKZF1	IKZF1	tethered-binding
HOXA4	HOXA4_FOXJ3	FOXJ3	tethered-binding
HOXA4	HOXA4_THAP	THAP	tethered-binding
HOXA5	HOXA5_CTCF	CTCF	tethered-binding
HOXA5	HOXA5_ZNF610	ZNF610	tethered-binding
HOXA9	HOXA9_CTCF	CTCF	tethered-binding
HOXA9	HOXA9_ZNF143	ZNF143	tethered-binding
HOXA9	HOXA9_VEZF1	VEZF1	tethered-binding
HOXA9	HOXA9_SOX10	SOX10	tethered-binding
HOXB13	HOXB13_VEZF1	VEZF1	cobinding
HOXB2	HOXB2_SP2	SP2	tethered-binding
HOXB2	HOXB2_ZNF76	ZNF76	tethered-binding
HOXB2	HOXB2_FOSL1::JUND	FOSL1::JUND	tethered-binding
HOXB2	HOXB2_FOXF2	FOXF2	tethered-binding
HOXD12	HOXD12_PITX2	PITX2	tethered-binding
HOXD12	HOXD12_FOS	FOS	tethered-binding
HOXD12	HOXD12_NFIC	NFIC	tethered-binding
HOXD12	HOXD12_FOXF2	FOXF2	tethered-binding
HSF1	HSF1_ZNF582	ZNF582	tethered-binding
HSF1	HSF1_ZNF502	ZNF502	tethered-binding
HSF1	HSF1_ZNF502	ZNF502	tethered-binding
HSF1	HSF1_ZNF502	ZNF502	tethered-binding
HSF1	HSF1_ZNF502	ZNF502	tethered-binding
HSF4	HSF4_CTCF	CTCF	cobinding
HSF4	HSF4_RFX3	RFX3	cobinding
HSF4	HSF4_MAZ	MAZ	cobinding
HSF4	HSF4_FOXL1	FOXL1	cobinding
IRF1	IRF1_SP2	SP2	cobinding
IRF1	IRF1_PITX2	PITX2	cobinding
IRF1	IRF1_CPEB1	CPEB1	cobinding
IRF3	IRF3_NRF1	NRF1	tethered-binding
IRF3	IRF3_PATZ1	PATZ1	tethered-binding
IRF3	IRF3_ZNF76	ZNF76	tethered-binding
IRF3	IRF3_CPEB1	CPEB1	tethered-binding
IRF3	IRF3_ELF2	ELF2	tethered-binding
IRF4	IRF4_STAT1::STAT2	STAT1::STAT2	tethered-binding
IRF4	IRF4_SP2	SP2	tethered-binding
IRF4	IRF4_Prdm15	Prdm15	tethered-binding
IRF4	IRF4_CTCF	CTCF	tethered-binding
IRF4	IRF4_ZNF143	ZNF143	tethered-binding
IRF5	IRF5_CTCFL	CTCFL	tethered-binding
IRF5	IRF5_ZNF93	ZNF93	tethered-binding
IRF5	IRF5_RREB1	RREB1	tethered-binding
IRF5	IRF5_SP2	SP2	tethered-binding
IRF5	IRF5_Prdm15	Prdm15	tethered-binding
IRF8	IRF8_PATZ1	PATZ1	tethered-binding
IRF8	IRF8_VEZF1	VEZF1	tethered-binding
IRF9	IRF9_PATZ1	PATZ1	tethered-binding
IRF9	IRF9_CPEB1	CPEB1	tethered-binding
IRF9	IRF9_SP2	SP2	tethered-binding
IRF9	IRF9_PITX2	PITX2	tethered-binding
ISX	ISX_ZNF460	ZNF460	tethered-binding
ISX	ISX_MEF2A	MEF2A	tethered-binding
ISX	ISX_NR5A1	NR5A1	tethered-binding
ISX	ISX_ZNF460	ZNF460	tethered-binding
ISX	ISX_SP2	SP2	tethered-binding
JAZF1	JAZF1_HOXD13	HOXD13	cobinding
JAZF1	JAZF1_HEY2	HEY2	cobinding
KLF10	KLF10_NFYB	NFYB	cobinding
KLF10	KLF10_FOXC2	FOXC2	cobinding
KLF12	KLF12_CPEB1	CPEB1	cobinding
KLF15	KLF15_RUNX2	RUNX2	cobinding
KLF16	KLF16_IRF1	IRF1	cobinding
KLF4	KLF4_TBX15	TBX15	cobinding
KLF5	KLF5_FOXL1	FOXL1	cobinding
KLF5	KLF5_RARB	RARB	cobinding
KLF6	KLF6_CPEB1	CPEB1	cobinding
KLF6	KLF6_THAP11	THAP11	cobinding
KLF8	KLF8_STAT1	STAT1	cobinding
KLF9	KLF9_PRDM1	PRDM1	cobinding
LEUTX	LEUTX_CPEB1	CPEB1	tethered-binding
LEUTX	LEUTX_ZNF770	ZNF770	tethered-binding
LHX1	LHX1_SP2	SP2	tethered-binding
LHX1	LHX1_ZNF460	ZNF460	tethered-binding
LHX1	LHX1_CPEB1	CPEB1	tethered-binding
LHX1	LHX1_RARB	RARB	tethered-binding
LHX1	LHX1_SP2	SP2	tethered-binding
LHX2	LHX2_SP2	SP2	tethered-binding
LHX2	LHX2_SP1	SP1	tethered-binding
LHX2	LHX2_MAZ	MAZ	tethered-binding
LHX2	LHX2_CPEB1	CPEB1	tethered-binding
LHX3	LHX3_SP2	SP2	tethered-binding
LHX3	LHX3_ZNF770	ZNF770	tethered-binding
LHX3	LHX3_VEZF1	VEZF1	tethered-binding
LHX3	LHX3_CPEB1	CPEB1	tethered-binding
LHX4	LHX4_VEZF1	VEZF1	tethered-binding
LHX4	LHX4_IKZF1	IKZF1	tethered-binding
LHX4	LHX4_SP2	SP2	tethered-binding
LHX6	LHX6_SP2	SP2	cobinding
LHX6	LHX6_ZSCAN31	ZSCAN31	cobinding
LHX8	LHX8_ZNF770	ZNF770	tethered-binding
LHX8	LHX8_CPEB1	CPEB1	tethered-binding
LHX8	LHX8_ZNF135	ZNF135	tethered-binding
LHX8	LHX8_SP2	SP2	tethered-binding
MAX	MAX_SP2	SP2	tethered-binding
MAX	MAX_ZNF76	ZNF76	tethered-binding
MAX	MAX_CPEB1	CPEB1	tethered-binding
MAX	MAX_CTCF	CTCF	tethered-binding
MEF2A	MEF2A_CPEB1	CPEB1	tethered-binding
MEF2A	MEF2A_ZNF460	ZNF460	tethered-binding
MYB	MYB_CPEB1	CPEB1	tethered-binding
MYB	MYB_SP2	SP2	tethered-binding
MYB	MYB_ZNF341	ZNF341	tethered-binding
MYB	MYB_CPEB1	CPEB1	tethered-binding
MYC	MYC_FOXL1	FOXL1	tethered-binding
MYC	MYC_VEZF1	VEZF1	tethered-binding
MYC	MYC_MAX	MAX	tethered-binding
MYC	MYC_Irf1	Irf1	tethered-binding
MYOD1	MYOD1_ZNF563	ZNF563	cobinding
MYSM1	MYSM1_ZNF502	ZNF502	tethered-binding
MYSM1	MYSM1_ZNF502	ZNF502	tethered-binding
MYSM1	MYSM1_ZNF502	ZNF502	tethered-binding
MYSM1	MYSM1_ZNF502	ZNF502	tethered-binding
MYSM1	MYSM1_ZNF770	ZNF770	tethered-binding
NFATC3	NFATC3_THAP1	THAP1	tethered-binding
NFATC3	NFATC3_FOXE1	FOXE1	tethered-binding
NFATC3	NFATC3_ZNF770	ZNF770	tethered-binding
NFATC3	NFATC3_ZNF263	ZNF263	tethered-binding
NFATC3	NFATC3_ZNF93	ZNF93	tethered-binding
NFATC4	NFATC4_ZNF93	ZNF93	tethered-binding
NFATC4	NFATC4_ZNF121	ZNF121	tethered-binding
NFATC4	NFATC4_ZNF770	ZNF770	tethered-binding
NFATC4	NFATC4_CPEB1	CPEB1	tethered-binding
NFIA	NFIA_VEZF1	VEZF1	cobinding
NFIA	NFIA_CPEB1	CPEB1	cobinding
NFIB	NFIB_CPEB1	CPEB1	cobinding
NFIB	NFIB_MAZ	MAZ	cobinding
NFIC	NFIC_CPEB1	CPEB1	cobinding
NFIC	NFIC_FOXD3	FOXD3	cobinding
NFIC	NFIC_SP1	SP1	cobinding
NFIX	NFIX_ZNF263	ZNF263	cobinding
NFKB1	NFKB1_SP3	SP3	cobinding
NFKB1	NFKB1_TCF7	TCF7	cobinding
NFKB1	NFKB1_CTCF	CTCF	cobinding
NFKB1	NFKB1_VEZF1	VEZF1	cobinding
NFYA	NFYA_ZNF502	ZNF502	tethered-binding
NFYA	NFYA_ZNF502	ZNF502	tethered-binding
NFYA	NFYA_ZNF502	ZNF502	tethered-binding
NFYA	NFYA_ZNF502	ZNF502	tethered-binding
NFYA	NFYA_ZNF502	ZNF502	tethered-binding
NFYC	NFYC_SP2	SP2	cobinding
NFYC	NFYC_PBX3	PBX3	cobinding
NKX2-5	NKX2-5_ZNF135	ZNF135	cobinding
NKX2-5	NKX2-5_ZNF384	ZNF384	cobinding
NR2F6	NR2F6_ZNF770	ZNF770	tethered-binding
NR2F6	NR2F6_JDP2	JDP2	tethered-binding
NR2F6	NR2F6_HOXD13	HOXD13	tethered-binding
OTX2	OTX2_ZNF770	ZNF770	tethered-binding
OTX2	OTX2_MEF2A	MEF2A	tethered-binding
OTX2	OTX2_ZNF135	ZNF135	tethered-binding
OTX2	OTX2_ZNF121	ZNF121	tethered-binding
PAX2	PAX2_CPEB1	CPEB1	tethered-binding
PAX2	PAX2_ZNF460	ZNF460	tethered-binding
PAX2	PAX2_ZNF460	ZNF460	tethered-binding
PAX2	PAX2_SP3	SP3	tethered-binding
PAX6	PAX6_ZNF770	ZNF770	cobinding
PAX6	PAX6_TBX15	TBX15	cobinding
PAX6	PAX6_EWSR1-FLI1	EWSR1-FLI1	cobinding
PAX7	PAX7_SP2	SP2	tethered-binding
PAX7	PAX7_ZNF121	ZNF121	tethered-binding
PAX7	PAX7_BACH2	BACH2	tethered-binding
PAX7	PAX7_VEZF1	VEZF1	tethered-binding
PAX8	PAX8_ZNF770	ZNF770	tethered-binding
PAX8	PAX8_HES2	HES2	tethered-binding
PAX9	PAX9_ZNF770	ZNF770	tethered-binding
PAX9	PAX9_ZFX	ZFX	tethered-binding
PAX9	PAX9_CPEB1	CPEB1	tethered-binding
PBX4	PBX4_NR5A1	NR5A1	cobinding
PBX4	PBX4_KLF2	KLF2	cobinding
PDX1	PDX1_SP2	SP2	tethered-binding
PDX1	PDX1_CPEB1	CPEB1	tethered-binding
PDX1	PDX1_SP5	SP5	tethered-binding
PDX1	PDX1_Prdm15	Prdm15	tethered-binding
PITX1	PITX1_ELK4	ELK4	tethered-binding
PITX1	PITX1_ZNF143	ZNF143	tethered-binding
PITX1	PITX1_NRF1	NRF1	tethered-binding
PITX1	PITX1_ZNF76	ZNF76	tethered-binding
POU2F1	POU2F1_FOXA1	FOXA1	cobinding
POU2F1	POU2F1_ZNF263	ZNF263	cobinding
POU2F1	POU2F1_SCRT1	SCRT1	cobinding
POU5F1	POU5F1_NR5A1	NR5A1	tethered-binding
POU5F1	POU5F1_CPEB1	CPEB1	tethered-binding
POU5F1	POU5F1_ZNF770	ZNF770	tethered-binding
POU5F1	POU5F1_NFIB	NFIB	tethered-binding
PPARG	PPARG_ZNF770	ZNF770	tethered-binding
PPARG	PPARG_CPEB1	CPEB1	tethered-binding
PPARG	PPARG_SP2	SP2	tethered-binding
RFX1	RFX1_SP2	SP2	cobinding
RFX1	RFX1_CPEB1	CPEB1	cobinding
RFX2	RFX2_KLF11	KLF11	cobinding
RFX2	RFX2_STAT1	STAT1	cobinding
RFX3	RFX3_FOXP2	FOXP2	tethered-binding
RFX3	RFX3_SP2	SP2	tethered-binding
RFX3	RFX3_ZBTB7B	ZBTB7B	tethered-binding
RFX3	RFX3_CPEB1	CPEB1	tethered-binding
RFX4	RFX4_ZNF76	ZNF76	tethered-binding
RFX4	RFX4_VEZF1	VEZF1	tethered-binding
RFX4	RFX4_CTCF	CTCF	tethered-binding
RFX4	RFX4_NRF1	NRF1	tethered-binding
RFX5	RFX5_ZBTB7B	ZBTB7B	tethered-binding
RFX5	RFX5_POU3F2	POU3F2	tethered-binding
RFX5	RFX5_KLF11	KLF11	tethered-binding
RFX5	RFX5_ELF3	ELF3	tethered-binding
RFX5	RFX5_ZBTB7B	ZBTB7B	tethered-binding
RFX6	RFX6_CTCF	CTCF	cobinding
RFX6	RFX6_NFIC	NFIC	cobinding
RFX6	RFX6_CREM	CREM	cobinding
RFX8	RFX8_ZNF770	ZNF770	tethered-binding
RFX8	RFX8_NR5A1	NR5A1	tethered-binding
RFX8	RFX8_ZNF121	ZNF121	tethered-binding
RFX8	RFX8_KLF2	KLF2	tethered-binding
RFX8	RFX8_IRF3	IRF3	tethered-binding
RREB1	RREB1_CPEB1	CPEB1	cobinding
RREB1	RREB1_COT1	COT1	cobinding
RREB1	RREB1_THAP	THAP	cobinding
RREB1	RREB1_RFX3	RFX3	cobinding
RXRA	RXRA_PITX2	PITX2	tethered-binding
RXRA	RXRA_CPEB1	CPEB1	tethered-binding
RXRA	RXRA_ZNF770	ZNF770	tethered-binding
RXRA	RXRA_ZNF460	ZNF460	tethered-binding
SATB1	SATB1_PATZ1	PATZ1	tethered-binding
SATB1	SATB1_ZFP82	ZFP82	tethered-binding
SATB1	SATB1_ZNF467	ZNF467	tethered-binding
SATB1	SATB1_Prdm15	Prdm15	tethered-binding
SATB1	SATB1_ZNF93	ZNF93	tethered-binding
SATB2	SATB2_PATZ1	PATZ1	tethered-binding
SATB2	SATB2_CPEB1	CPEB1	tethered-binding
SATB2	SATB2_Prdm15	Prdm15	tethered-binding
SATB2	SATB2_MEF2D	MEF2D	tethered-binding
SIX4	SIX4_ZNF770	ZNF770	tethered-binding
SIX4	SIX4_NR5A1	NR5A1	tethered-binding
SIX4	SIX4_ZNF770	ZNF770	tethered-binding
SIX5	SIX5_ZNF502	ZNF502	tethered-binding
SIX5	SIX5_ZNF502	ZNF502	tethered-binding
SIX5	SIX5_ZNF502	ZNF502	tethered-binding
SIX5	SIX5_ZNF502	ZNF502	tethered-binding
SKIL	SKIL_NRF1	NRF1	tethered-binding
SKIL	SKIL_ZNF76	ZNF76	tethered-binding
SKIL	SKIL_SP3	SP3	tethered-binding
SKIL	SKIL_NRF1	NRF1	tethered-binding
SKIL	SKIL_CPEB1	CPEB1	tethered-binding
SMAD1	SMAD1_CPEB1	CPEB1	tethered-binding
SMAD1	SMAD1_PITX2	PITX2	tethered-binding
SMAD1	SMAD1_WT1	WT1	tethered-binding
SMAD1	SMAD1_ZNF770	ZNF770	tethered-binding
SMAD1	SMAD1_ZNF143	ZNF143	tethered-binding
SMAD5	SMAD5_CPEB1	CPEB1	tethered-binding
SMAD5	SMAD5_ZNF770	ZNF770	tethered-binding
SMAD5	SMAD5_TEAD1	TEAD1	tethered-binding
SOX10	SOX10_SP2	SP2	cobinding
SOX10	SOX10_MAZ	MAZ	cobinding
SOX10	SOX10_CPEB1	CPEB1	cobinding
SOX15	SOX15_PATZ1	PATZ1	tethered-binding
SOX15	SOX15_CPEB1	CPEB1	tethered-binding
SOX15	SOX15_HOXB13	HOXB13	tethered-binding
SOX15	SOX15_THAP11	THAP11	tethered-binding
SOX17	SOX17_SP2	SP2	cobinding
SOX17	SOX17_CPEB1	CPEB1	cobinding
SOX17	SOX17_SP2	SP2	cobinding
SOX17	SOX17_PITX2	PITX2	cobinding
SOX2	SOX2_VEZF1	VEZF1	tethered-binding
SOX2	SOX2_MEIS2	MEIS2	tethered-binding
SOX2	SOX2_ZIC2	ZIC2	tethered-binding
SOX4	SOX4_PATZ1	PATZ1	tethered-binding
SOX4	SOX4_Prdm15	Prdm15	tethered-binding
SOX4	SOX4_ZNF467	ZNF467	tethered-binding
SOX4	SOX4_CTCFL	CTCFL	tethered-binding
SOX4	SOX4_ZNF76	ZNF76	tethered-binding
SOX5	SOX5_ZNF467	ZNF467	tethered-binding
SOX5	SOX5_FOXG1	FOXG1	tethered-binding
SOX5	SOX5_ZN281	ZN281	tethered-binding
SOX5	SOX5_ZNF93	ZNF93	tethered-binding
SOX6	SOX6_VEZF1	VEZF1	tethered-binding
SOX6	SOX6_CPEB1	CPEB1	tethered-binding
SOX6	SOX6_MAZ	MAZ	tethered-binding
SOX6	SOX6_FOXF1	FOXF1	tethered-binding
SOX9	SOX9_ZNF467	ZNF467	cobinding
SOX9	SOX9_CPEB1	CPEB1	cobinding
SOX9	SOX9_RREB1	RREB1	cobinding
SP7	SP7_DLX5	DLX5	cobinding
SPDEF	SPDEF_ZN281	ZN281	cobinding
SPDEF	SPDEF_FOXL1	FOXL1	cobinding
SPDEF	SPDEF_RREB1	RREB1	cobinding
SPI1	SPI1_BCL11A	BCL11A	cobinding
SPI1	SPI1_ZNF770	ZNF770	cobinding
SPI1	SPI1_NRF1	NRF1	cobinding
SPIB	SPIB_NRF1	NRF1	cobinding
SPIB	SPIB_BCL11A	BCL11A	cobinding
SPIB	SPIB_CPEB1	CPEB1	cobinding
SPIB	SPIB_PITX2	PITX2	cobinding
SPIC	SPIC_SP2	SP2	cobinding
SPIC	SPIC_MAZ	MAZ	cobinding
SPIC	SPIC_CPEB1	CPEB1	cobinding
SPIC	SPIC_CTCF	CTCF	cobinding
SPZ1	SPZ1_ZNF93	ZNF93	tethered-binding
SPZ1	SPZ1_NRF1	NRF1	tethered-binding
SPZ1	SPZ1_ZNF76	ZNF76	tethered-binding
SPZ1	SPZ1_GABPA	GABPA	tethered-binding
SPZ1	SPZ1_SP2	SP2	tethered-binding
STAT1	STAT1_ZNF384	ZNF384	tethered-binding
STAT1	STAT1_THAP1	THAP1	tethered-binding
STAT3	STAT3_ZNF93	ZNF93	tethered-binding
STAT3	STAT3_CTCFL	CTCFL	tethered-binding
STAT3	STAT3_SP2	SP2	tethered-binding
STAT3	STAT3_CPEB1	CPEB1	tethered-binding
STAT3	STAT3_Prdm15	Prdm15	tethered-binding
STAT4	STAT4_ZNF93	ZNF93	tethered-binding
STAT4	STAT4_ZNF467	ZNF467	tethered-binding
STAT4	STAT4_TBP	TBP	tethered-binding
STAT4	STAT4_Prdm15	Prdm15	tethered-binding
STAT4	STAT4_ATF7	ATF7	tethered-binding
STAT5A	STAT5A_ZNF263	ZNF263	tethered-binding
STAT5A	STAT5A_CREM	CREM	tethered-binding
STAT5A	STAT5A_ZNF143	ZNF143	tethered-binding
STAT5A	STAT5A_SP3	SP3	tethered-binding
STAT5B	STAT5B_ZNF93	ZNF93	tethered-binding
STAT5B	STAT5B_SP3	SP3	tethered-binding
STAT5B	STAT5B_CTCFL	CTCFL	tethered-binding
STAT5B	STAT5B_Prdm15	Prdm15	tethered-binding
STAT5B	STAT5B_ANDR	ANDR	tethered-binding
TBR1	TBR1_ZNF467	ZNF467	tethered-binding
TBR1	TBR1_ZNF770	ZNF770	tethered-binding
TBR1	TBR1_ZNF281	ZNF281	tethered-binding
TBX21	TBX21_HOXD11	HOXD11	tethered-binding
TBX21	TBX21_ZIC3	ZIC3	tethered-binding
TBX21	TBX21_GATA6	GATA6	tethered-binding
TBXT	TBXT_ZNF770	ZNF770	cobinding
TBXT	TBXT_THAP	THAP	cobinding
TCF3	TCF3_PITX2	PITX2	tethered-binding
TCF3	TCF3_MEF2A	MEF2A	tethered-binding
TCF3	TCF3_ZNF770	ZNF770	tethered-binding
TCF3	TCF3_ZFX	ZFX	tethered-binding
TEAD1	TEAD1_CPEB1	CPEB1	cobinding
TEAD1	TEAD1_SP1	SP1	cobinding
TEAD1	TEAD1_ZNF467	ZNF467	cobinding
TEAD1	TEAD1_SP1	SP1	cobinding
TEAD2	TEAD2_SP2	SP2	cobinding
TEAD2	TEAD2_CPEB1	CPEB1	cobinding
TEAD2	TEAD2_VEZF1	VEZF1	cobinding
TEAD3	TEAD3_ZNF93	ZNF93	tethered-binding
TEAD3	TEAD3_ZNF263	ZNF263	tethered-binding
TEAD4	TEAD4_CTCF	CTCF	cobinding
TEAD4	TEAD4_SP2	SP2	cobinding
TEAD4	TEAD4_CPEB1	CPEB1	cobinding
TEAD4	TEAD4_ZNF770	ZNF770	cobinding
TFAP2A	TFAP2A_SP2	SP2	cobinding
TFAP2A	TFAP2A_FOXC2	FOXC2	cobinding
TFAP2A	TFAP2A_ZNF143	ZNF143	cobinding
TFAP2A	TFAP2A_VEZF1	VEZF1	cobinding
TFAP2C	TFAP2C_FOXL1	FOXL1	cobinding
TFAP2C	TFAP2C_IKZF1	IKZF1	cobinding
TFAP2C	TFAP2C_CTCF	CTCF	cobinding
TFAP2C	TFAP2C_THAP	THAP	cobinding
TFAP4	TFAP4_CPEB1	CPEB1	tethered-binding
TFAP4	TFAP4_ZNF770	ZNF770	tethered-binding
TFAP4	TFAP4_ZNF460	ZNF460	tethered-binding
TLX1	TLX1_NR5A1	NR5A1	tethered-binding
TLX1	TLX1_MAZ	MAZ	tethered-binding
TLX1	TLX1_ZIC3	ZIC3	tethered-binding
TLX1	TLX1_KLF2	KLF2	tethered-binding
TLX2	TLX2_SP2	SP2	tethered-binding
TLX2	TLX2_ZIC3	ZIC3	tethered-binding
TLX2	TLX2_SP2	SP2	tethered-binding
TLX2	TLX2_CPEB1	CPEB1	tethered-binding
TLX3	TLX3_KLF16	KLF16	tethered-binding
TLX3	TLX3_Zic3	Zic3	tethered-binding
TLX3	TLX3_NFIC	NFIC	tethered-binding
TLX3	TLX3_FOSL1	FOSL1	tethered-binding
TPRX1	TPRX1_PATZ1	PATZ1	tethered-binding
TPRX1	TPRX1_NR5A1	NR5A1	tethered-binding
TPRX1	TPRX1_CPEB1	CPEB1	tethered-binding
TPRX2	TPRX2_NR5A1	NR5A1	cobinding
TPRX2	TPRX2_MEF2A	MEF2A	cobinding
TPRX2	TPRX2_NFIC	NFIC	cobinding
USF1	USF1_CDX4	CDX4	tethered-binding
USF1	USF1_VEZF1	VEZF1	tethered-binding
USF1	USF1_ZIC3	ZIC3	tethered-binding
USF1	USF1_NFIC	NFIC	tethered-binding
VSX1	VSX1_ZNF770	ZNF770	cobinding
VSX1	VSX1_ZNF135	ZNF135	cobinding
XBP1	XBP1_ZNF770	ZNF770	tethered-binding
XBP1	XBP1_MEF2A	MEF2A	tethered-binding
XBP1	XBP1_NR5A1	NR5A1	tethered-binding
XBP1	XBP1_ZNF135	ZNF135	tethered-binding
ZBTB7B	ZBTB7B_MEF2A	MEF2A	cobinding
ZBTB7B	ZBTB7B_PITX2	PITX2	cobinding
ZGPAT	ZGPAT_PITX2	PITX2	tethered-binding
ZGPAT	ZGPAT_THAP	THAP	tethered-binding
ZGPAT	ZGPAT_LMX1A	LMX1A	tethered-binding
ZHX2	ZHX2_MEF2A	MEF2A	tethered-binding
ZHX2	ZHX2_ZNF770	ZNF770	tethered-binding
ZHX2	ZHX2_HES2	HES2	tethered-binding
ZIC3	ZIC3_CPEB1	CPEB1	cobinding
ZNF200	ZNF200_PITX2	PITX2	tethered-binding
ZNF200	ZNF200_GATA2	GATA2	tethered-binding
ZNF808	ZNF808_NR1H3	NR1H3	cobinding
ZNF808	ZNF808_STAT1	STAT1	cobinding
