# Supplementary material
Source: Research Square preprint supplement (doi:10.21203/rs.3.rs-8894562/v1)
Supplement: Supplementary file 2 [file 192ff0ae577211854e625796.xlsx]

## Sheet: BaalChIP-results
Tag	ID	CHROM	POS	REF	ALT	REF.counts	ALT.counts	Total.counts	AR	RMbias	RAF	Bayes_lower	Bayes_upper	Corrected.AR	isASB	TF_name
1	rs10043083	chr5	1995573	G	C	2	4	6	0.333333	0.536663	0	0.901301	0.995396	0.948349	TRUE	ARGFX
2	rs1009156	chr22	46538704	G	A	16	4	20	0.8	0.536663	0.571429	0.517052	0.880047	0.698549	FALSE	ARGFX
3	rs1019512	chr5	32317333	C	T	8	4	12	0.666667	0.536663	0.666667	0.27392	0.753868	0.513894	FALSE	ARGFX
4	rs10225507	chr7	27130964	C	T	12	12	24	0.5	0.536663	0.375	0.453491	0.786582	0.620037	FALSE	ARGFX
5	rs10417381	chr19	3036352	T	C	12	16	28	0.428571	0.536663	0.333333	0.444802	0.770836	0.607819	FALSE	ARGFX
6	rs1057137	chr8	27459928	G	T	10	12	22	0.454545	0.536663	0.5	0.29048	0.651451	0.470966	FALSE	ARGFX
7	rs10773828	chr12	130838897	C	T	12	4	16	0.75	0.536663	1	0.0101681	0.0904623	0.0503152	TRUE	ARGFX
8	rs10863751	chr1	209062404	C	T	4	2	6	0.666667	0.536663	0.5	0.322438	0.873101	0.59777	FALSE	ARGFX
9	rs10915962	chr1	226223616	C	T	4	16	20	0.2	0.536663	0.333333	0.172933	0.584099	0.378516	FALSE	ARGFX
10	rs1109838	chr16	89828204	C	A	6	12	18	0.333333	0.536663	0.333333	0.317296	0.72445	0.520873	FALSE	ARGFX
11	rs11121691	chr1	11121270	C	T	4	14	18	0.222222	0.536663	0	0.906461	0.991527	0.948994	TRUE	ARGFX
12	rs111308825	chr19	33622079	G	A	42	14	56	0.75	0.536663	0.9	0.158544	0.372812	0.265678	TRUE	ARGFX
13	rs11160833	chr14	105090717	C	G	16	4	20	0.8	0.536663	0.5	0.599151	0.916121	0.757636	FALSE	ARGFX
14	rs11205707	chr1	50333190	G	A	14	20	34	0.411765	0.536663	0.2	0.611916	0.855124	0.73352	TRUE	ARGFX
15	rs112619223	chr7	138461033	C	T	12	10	22	0.545455	0.536663	0.666667	0.224206	0.584059	0.404133	FALSE	ARGFX
16	rs112652199	chr19	10416598	C	G	4	16	20	0.2	0.536663	0.6	0.0645555	0.327394	0.195975	TRUE	ARGFX
17	rs112835547	chr19	3585336	C	T	2	2	4	0.5	0.536663	1	0.00296278	0.0921753	0.047569	TRUE	ARGFX
18	rs112946632	chr2	238240172	A	C	6	4	10	0.6	0.536663	0	0.975453	0.997193	0.986323	TRUE	ARGFX
19	rs113338846	chr5	95731151	G	C	24	2	26	0.923077	0.536663	1	0.02857	0.340429	0.184499	TRUE	ARGFX
20	rs113340201	chr2	229921973	G	C	10	4	14	0.714286	0.536663	1	0.00945221	0.0765431	0.0429977	TRUE	ARGFX
21	rs113368091	chr12	51590852	C	A	10	24	34	0.294118	0.536663	0	0.947268	0.987617	0.967442	TRUE	ARGFX
22	rs114982608	chr1	941767	G	A	8	14	22	0.363636	0.536663	0.166667	0.565431	0.875669	0.72055	FALSE	ARGFX
23	rs11576019	chr1	32248405	G	C	14	12	26	0.538462	0.536663	0.8	0.141845	0.396033	0.268939	TRUE	ARGFX
24	rs115892653	chr1	23168827	C	A	16	6	22	0.727273	0.536663	0.75	0.282745	0.679969	0.481357	FALSE	ARGFX
25	rs11617995	chr13	110912717	A	G	16	4	20	0.8	0.536663	1	0.0133806	0.108406	0.0608933	TRUE	ARGFX
26	rs11641896	chr16	75266281	T	C	2	16	18	0.111111	0.536663	0.333333	0.0887659	0.509667	0.299216	FALSE	ARGFX
27	rs11642660	chr16	85420957	G	C	6	30	36	0.166667	0.536663	0	0.887797	0.983093	0.935445	TRUE	ARGFX
28	rs11669599	chr19	40663389	C	A	12	24	36	0.333333	0.536663	0.333333	0.354755	0.67543	0.515093	FALSE	ARGFX
29	rs11673016	chr19	48291117	G	A	16	8	24	0.666667	0.536663	0.666667	0.31494	0.690794	0.502867	FALSE	ARGFX
30	rs11701575	chr21	37073754	T	C	40	6	46	0.869565	0.536663	0.8	0.423635	0.76732	0.595477	FALSE	ARGFX
31	rs117990130	chr16	89720932	C	T	10	26	36	0.277778	0.536663	0.454545	0.201516	0.480031	0.340773	FALSE	ARGFX
32	rs118025671	chr19	2219784	G	A	10	6	16	0.625	0.536663	1	0.00905603	0.0428487	0.0259524	TRUE	ARGFX
33	rs118064999	chr19	1017254	C	A	20	8	28	0.714286	0.536663	0.5	0.535025	0.843613	0.689319	FALSE	ARGFX
34	rs118177621	chr19	29806422	G	C	10	2	12	0.833333	0.536663	0.666667	0.391489	0.873104	0.632297	FALSE	ARGFX
35	rs11913631	chr22	41951367	G	T	14	6	20	0.7	0.536663	0.25	0.731161	0.936154	0.833658	TRUE	ARGFX
36	rs12063227	chr1	40881380	C	T	6	8	14	0.428571	0.536663	0.5	0.225758	0.663905	0.444832	FALSE	ARGFX
37	rs12134070	chr1	175314454	A	G	6	4	10	0.6	0.536663	0.5	0.345201	0.821852	0.583527	FALSE	ARGFX
38	rs12403036	chr1	43991633	G	A	22	16	38	0.578947	0.536663	0.875	0.0955374	0.268313	0.181925	TRUE	ARGFX
39	rs12409704	chr1	16146498	C	T	14	4	18	0.777778	0.536663	1	0.0117352	0.100174	0.0559545	TRUE	ARGFX
40	rs12430462	chr13	52450239	G	C	16	2	18	0.888889	0.536663	1	0.0158026	0.293592	0.154697	TRUE	ARGFX
41	rs12541494	chr8	123417155	A	G	4	8	12	0.333333	0.536663	0	0.937761	0.991418	0.96459	TRUE	ARGFX
42	rs12567442	chr1	230129001	G	A	16	4	20	0.8	0.536663	0	0.993198	0.998948	0.996073	TRUE	ARGFX
43	rs12725494	chr1	203027461	A	G	4	4	8	0.5	0.536663	0.333333	0.390437	0.864303	0.62737	FALSE	ARGFX
44	rs1274524	chr12	94650492	T	C	6	14	20	0.3	0.536663	1	0.00164232	0.0101283	0.00588533	TRUE	ARGFX
45	rs12889089	chr14	90799257	C	A	4	4	8	0.5	0.536663	0	0.952942	0.996731	0.974837	TRUE	ARGFX
46	rs12921103	chr16	28278861	G	A	10	6	16	0.625	0.536663	0.666667	0.248809	0.678104	0.463456	FALSE	ARGFX
47	rs12953299	chr17	17823334	A	G	10	8	18	0.555556	0.536663	1	0.00536394	0.0325555	0.0189597	TRUE	ARGFX
48	rs12985118	chr19	5338964	T	C	6	10	16	0.375	0.536663	0.666667	0.115557	0.448791	0.282174	FALSE	ARGFX
49	rs13003268	chr2	38522975	G	C	12	2	14	0.857143	0.536663	0	0.993757	0.998919	0.996338	TRUE	ARGFX
50	rs13337338	chr16	85557180	C	T	12	6	18	0.666667	0.536663	0.5	0.459936	0.837107	0.648522	FALSE	ARGFX
51	rs13422401	chr2	201912134	G	T	2	2	4	0.5	0.536663	0	0.928797	0.999555	0.964176	TRUE	ARGFX
52	rs138175938	chr19	8241062	G	A	4	8	12	0.333333	0.536663	0.5	0.148573	0.604514	0.376544	FALSE	ARGFX
53	rs138808588	chr13	42040386	T	C	8	18	26	0.307692	0.536663	0	0.945121	0.98831	0.966715	TRUE	ARGFX
54	rs139501813	chr2	238847617	G	A	8	4	12	0.666667	0.536663	0.5	0.420466	0.863294	0.64188	FALSE	ARGFX
55	rs141549561	chr19	48331693	G	A	10	2	12	0.833333	0.536663	0.5	0.54455	0.937089	0.740819	FALSE	ARGFX
56	rs141580099	chr21	45387892	C	G	10	2	12	0.833333	0.536663	1	0.0122482	0.221513	0.116881	TRUE	ARGFX
57	rs146605240	chr20	50931128	C	T	10	6	16	0.625	0.536663	1	0.00905603	0.0428487	0.0259524	TRUE	ARGFX
58	rs148010116	chr17	28417930	G	A	8	6	14	0.571429	0.536663	0.5	0.349716	0.780227	0.564972	FALSE	ARGFX
59	rs148382115	chr8	142739282	A	T	8	10	18	0.444444	0.536663	0	0.970303	0.995785	0.983044	TRUE	ARGFX
60	rs149688477	chr9	135071681	G	A	12	2	14	0.857143	0.536663	1	0.0141777	0.247599	0.130889	TRUE	ARGFX
61	rs1547239	chr21	43718319	T	C	2	20	22	0.0909091	0.536663	0	0.744059	0.976992	0.860525	TRUE	ARGFX
62	rs1632169	chr18	36129799	G	C	2	28	30	0.0666667	0.536663	0	0.705894	0.969164	0.837529	TRUE	ARGFX
63	rs1713434	chr14	20413368	T	C	2	8	10	0.2	0.536663	0.5	0.0880027	0.516065	0.302034	FALSE	ARGFX
64	rs1765003	chr20	4155202	G	A	2	6	8	0.25	0.536663	0	0.874167	0.995752	0.934959	TRUE	ARGFX
65	rs17694108	chr19	33240645	G	A	6	14	20	0.3	0.536663	0.2	0.440955	0.826875	0.633915	FALSE	ARGFX
66	rs1783049	chr21	37682985	T	C	14	2	16	0.875	0.536663	0	0.994867	0.999196	0.997032	TRUE	ARGFX
67	rs17882748	chr21	33403415	T	C	24	4	28	0.857143	0.536663	1	0.0224644	0.161366	0.091915	TRUE	ARGFX
68	rs179744	chr14	31027006	T	C	14	2	16	0.875	0.536663	0.5	0.655671	0.961702	0.808687	TRUE	ARGFX
69	rs181823528	chr15	33068891	G	A	14	2	16	0.875	0.536663	1	0.015148	0.265021	0.140084	TRUE	ARGFX
70	rs182025879	chr1	8703291	C	A	6	2	8	0.75	0.536663	0.5	0.437814	0.911251	0.674532	FALSE	ARGFX
71	rs184999142	chr16	28822622	G	T	60	2	62	0.967742	0.536663	1	0.0743426	0.490163	0.282253	FALSE	ARGFX
72	rs1859953	chr19	2145451	T	C	4	8	12	0.333333	0.536663	1	0.00392612	0.0168564	0.0103913	TRUE	ARGFX
73	rs1864029	chr19	7952934	G	A	2	6	8	0.25	0.536663	1	0.0026838	0.0151048	0.00889429	TRUE	ARGFX
74	rs1884010	chr14	28774515	A	G	22	10	32	0.6875	0.536663	0	0.991319	0.997543	0.994431	TRUE	ARGFX
75	rs190195538	chr5	177447185	T	G	24	2	26	0.923077	0.536663	1	0.02857	0.340429	0.184499	TRUE	ARGFX
76	rs191386107	chrX	69208648	A	G	4	6	10	0.4	0.536663	0	0.947757	0.995791	0.971774	TRUE	ARGFX
77	rs192636910	chr22	31944414	T	A	20	2	22	0.909091	0.536663	1	0.0258194	0.318744	0.172282	TRUE	ARGFX
78	rs1944571	chr18	48230946	G	A	12	4	16	0.75	0.536663	1	0.0101681	0.0904623	0.0503152	TRUE	ARGFX
79	rs1984069	chr1	3419636	C	T	4	22	26	0.153846	0.536663	0.333333	0.157193	0.518381	0.337787	FALSE	ARGFX
80	rs2020948	chr21	44063352	G	A	2	16	18	0.111111	0.536663	0	0.770301	0.981468	0.875884	TRUE	ARGFX
81	rs2250306	chr16	3046862	G	T	2	8	10	0.2	0.536663	0.5	0.0880027	0.516065	0.302034	FALSE	ARGFX
82	rs2278049	chr16	77212898	C	G	16	8	24	0.666667	0.536663	0.6	0.400703	0.754244	0.577473	FALSE	ARGFX
83	rs2295412	chr20	21303598	T	C	4	24	28	0.142857	0.536663	0.2	0.247245	0.663534	0.45539	FALSE	ARGFX
84	rs2299805	chr21	43728427	C	G	6	26	32	0.1875	0.536663	0	0.898986	0.982568	0.940777	TRUE	ARGFX
85	rs2306941	chr1	179229518	T	C	10	8	18	0.555556	0.536663	0	0.980037	0.99627	0.988153	TRUE	ARGFX
86	rs233253	chr21	44559372	G	A	10	4	14	0.714286	0.536663	1	0.00945221	0.0765431	0.0429977	TRUE	ARGFX
87	rs2409489	chr21	33370311	A	G	2	16	18	0.111111	0.536663	0	0.770301	0.981468	0.875884	TRUE	ARGFX
88	rs2466208	chr8	22909036	C	T	4	10	14	0.285714	0.536663	1	0.00170761	0.0109429	0.00632525	TRUE	ARGFX
89	rs251742	chr16	4266167	G	A	10	6	16	0.625	0.536663	0	0.984606	0.997291	0.990948	TRUE	ARGFX
90	rs2533003	chr17	58083481	T	C	12	2	14	0.857143	0.536663	0.5	0.614715	0.957626	0.786171	TRUE	ARGFX
91	rs2682327	chr12	52970449	G	A	10	2	12	0.833333	0.536663	1	0.0122482	0.221513	0.116881	TRUE	ARGFX
92	rs2757560	chr6	7911015	C	A	20	2	22	0.909091	0.536663	1	0.0258194	0.318744	0.172282	TRUE	ARGFX
93	rs2816604	chr14	105248990	A	C	12	2	14	0.857143	0.536663	1	0.0141777	0.247599	0.130889	TRUE	ARGFX
94	rs28514715	chr17	3795774	C	T	6	4	10	0.6	0.536663	0.333333	0.503594	0.9016	0.702597	FALSE	ARGFX
95	rs28702740	chr3	24072878	G	A	10	6	16	0.625	0.536663	0	0.984606	0.997291	0.990948	TRUE	ARGFX
96	rs2889663	chr2	106262306	C	T	4	10	14	0.285714	0.536663	0.5	0.143107	0.558342	0.350725	FALSE	ARGFX
97	rs2967510	chr19	36379481	C	G	24	4	28	0.857143	0.536663	1	0.0224644	0.161366	0.091915	TRUE	ARGFX
98	rs34887712	chr7	149625097	C	G	4	14	18	0.222222	0.536663	0.142857	0.418993	0.835497	0.627245	FALSE	ARGFX
99	rs35120096	chr2	38523106	G	A	2	10	12	0.166667	0.536663	0.666667	0.0404617	0.321202	0.180832	TRUE	ARGFX
100	rs35220381	chr17	50866879	C	T	8	12	20	0.4	0.536663	0.333333	0.387122	0.753473	0.570297	FALSE	ARGFX
101	rs35501398	chr19	12801913	G	A	16	10	26	0.615385	0.536663	0.75	0.215372	0.539005	0.377188	FALSE	ARGFX
102	rs35634464	chr17	7043240	G	A	4	8	12	0.333333	0.536663	0.5	0.148573	0.604514	0.376544	FALSE	ARGFX
103	rs368922188	chr1	23960020	G	T	16	2	18	0.888889	0.536663	1	0.0158026	0.293592	0.154697	TRUE	ARGFX
104	rs372881388	chr7	115790035	G	T	14	2	16	0.875	0.536663	1	0.015148	0.265021	0.140084	TRUE	ARGFX
105	rs3752547	chr1	9234844	C	G	14	16	30	0.466667	0.536663	0.2	0.647428	0.87416	0.760794	TRUE	ARGFX
106	rs3756662	chr5	33440518	C	T	26	2	28	0.928571	0.536663	0.833333	0.420179	0.874318	0.647248	FALSE	ARGFX
107	rs3759608	chr14	23121070	G	A	12	8	20	0.6	0.536663	0.5	0.394645	0.771964	0.583304	FALSE	ARGFX
108	rs3764589	chr19	3366788	G	T	16	6	22	0.727273	0.536663	0.2	0.815668	0.960935	0.888301	TRUE	ARGFX
109	rs376939093	chr1	65265843	G	A	16	2	18	0.888889	0.536663	1	0.0158026	0.293592	0.154697	TRUE	ARGFX
110	rs3806187	chr1	159780839	G	A	6	4	10	0.6	0.536663	0.333333	0.503594	0.9016	0.702597	FALSE	ARGFX
111	rs3809139	chr12	26126635	G	A	8	20	28	0.285714	0.536663	0	0.944473	0.989706	0.967089	TRUE	ARGFX
112	rs41428545	chr19	33303120	C	T	2	26	28	0.0714286	0.536663	0.2	0.126918	0.560085	0.343501	FALSE	ARGFX
113	rs4337532	chr20	64083736	G	A	2	18	20	0.1	0.536663	0.25	0.123504	0.570908	0.347206	FALSE	ARGFX
114	rs4431000	chr20	64084195	C	A	2	14	16	0.125	0.536663	0.333333	0.111077	0.554125	0.332601	FALSE	ARGFX
115	rs4435314	chr17	7932341	G	A	16	16	32	0.5	0.536663	0	0.981779	0.994254	0.988017	TRUE	ARGFX
116	rs4578132	chrX	77017344	G	A	8	6	14	0.571429	0.536663	1	0.00475067	0.0367745	0.0207626	TRUE	ARGFX
117	rs4788003	chr16	27888079	C	T	12	10	22	0.545455	0.536663	0.5	0.371417	0.728576	0.549996	FALSE	ARGFX
118	rs4809331	chr20	63739537	A	G	4	8	12	0.333333	0.536663	1	0.00392612	0.0168564	0.0103913	TRUE	ARGFX
119	rs4838860	chr22	50186480	G	C	10	4	14	0.714286	0.536663	0.25	0.723483	0.95801	0.840747	TRUE	ARGFX
120	rs4911358	chr20	33674407	G	C	12	4	16	0.75	0.536663	1	0.0101681	0.0904623	0.0503152	TRUE	ARGFX
121	rs4911409	chr20	34122904	G	A	8	6	14	0.571429	0.536663	1	0.00475067	0.0367745	0.0207626	TRUE	ARGFX
122	rs551029	chrX	23666450	G	A	2	10	12	0.166667	0.536663	0	0.839585	0.989613	0.914599	TRUE	ARGFX
123	rs55961512	chr15	90002518	G	T	12	6	18	0.666667	0.536663	0	0.987814	0.998463	0.993139	TRUE	ARGFX
124	rs56027245	chr1	202144070	G	A	16	10	26	0.615385	0.536663	0.5	0.444778	0.787771	0.616274	FALSE	ARGFX
125	rs56252442	chr19	18118398	G	T	18	14	32	0.5625	0.536663	0.875	0.0871958	0.27202	0.179608	TRUE	ARGFX
126	rs56332896	chr15	67542465	C	T	24	6	30	0.8	0.536663	0.2	0.877117	0.975722	0.92642	TRUE	ARGFX
127	rs57591949	chr19	39126045	C	T	8	42	50	0.16	0.536663	0.428571	0.123663	0.351446	0.237555	TRUE	ARGFX
128	rs57597951	chr3	15378317	T	G	14	2	16	0.875	0.536663	1	0.015148	0.265021	0.140084	TRUE	ARGFX
129	rs57887245	chr1	68843708	T	C	6	6	12	0.5	0.536663	0	0.970375	0.997125	0.98375	TRUE	ARGFX
130	rs58270608	chr21	44522862	T	C	8	8	16	0.5	0.536663	0	0.973554	0.995422	0.984488	TRUE	ARGFX
131	rs593644	chr1	110128698	T	G	2	6	8	0.25	0.536663	0	0.874167	0.995752	0.934959	TRUE	ARGFX
132	rs6033858	chr20	1467025	C	T	20	14	34	0.588235	0.536663	0.833333	0.133431	0.356615	0.245023	TRUE	ARGFX
133	rs60590291	chr10	69498930	G	T	6	2	8	0.75	0.536663	1	0.00679935	0.164675	0.0857369	TRUE	ARGFX
134	rs61078535	chr14	96772310	G	A	8	6	14	0.571429	0.536663	0.5	0.349716	0.780227	0.564972	FALSE	ARGFX
135	rs6142641	chr20	62369202	G	A	16	18	34	0.470588	0.536663	0.2	0.65623	0.86977	0.763	TRUE	ARGFX
136	rs61811895	chr1	155003661	G	T	8	16	24	0.333333	0.536663	0.666667	0.10763	0.371075	0.239353	TRUE	ARGFX
137	rs61933190	chr12	64451935	G	A	12	14	26	0.461538	0.536663	0	0.974601	0.993507	0.984054	TRUE	ARGFX
138	rs61955196	chr12	122966471	G	C	24	12	36	0.666667	0.536663	1	0.00965898	0.037952	0.0238055	TRUE	ARGFX
139	rs61994063	chr14	92687067	G	A	10	22	32	0.3125	0.536663	0.5	0.194134	0.487191	0.340662	FALSE	ARGFX
140	rs62055866	chr16	30958236	G	C	8	16	24	0.333333	0.536663	0	0.953336	0.992765	0.97305	TRUE	ARGFX
141	rs62130136	chr19	1747285	G	A	6	4	10	0.6	0.536663	0	0.975453	0.997193	0.986323	TRUE	ARGFX
142	rs62229509	chr22	18157337	C	T	2	14	16	0.125	0.536663	0	0.786568	0.98432	0.885444	TRUE	ARGFX
143	rs633447	chrX	70083948	C	T	6	6	12	0.5	0.536663	0.5	0.27126	0.743592	0.507426	FALSE	ARGFX
144	rs6439667	chr3	136820008	G	C	6	4	10	0.6	0.536663	0	0.975453	0.997193	0.986323	TRUE	ARGFX
145	rs6509955	chr19	55703818	G	A	8	2	10	0.8	0.536663	0.5	0.510542	0.940466	0.725504	FALSE	ARGFX
146	rs6544602	chr2	42830066	A	G	4	8	12	0.333333	0.536663	0.5	0.148573	0.604514	0.376544	FALSE	ARGFX
147	rs6634990	chrX	134459991	T	G	2	12	14	0.142857	0.536663	0	0.823931	0.989804	0.906868	TRUE	ARGFX
148	rs6647460	chrX	74207427	G	A	12	2	14	0.857143	0.536663	1	0.0141777	0.247599	0.130889	TRUE	ARGFX
149	rs6647476	chrX	74421734	T	C	20	10	30	0.666667	0.536663	0.857143	0.148143	0.41818	0.283162	FALSE	ARGFX
150	rs6661240	chr1	200669719	A	G	24	8	32	0.75	0.536663	1	0.0136662	0.0616971	0.0376817	TRUE	ARGFX
151	rs6688581	chr1	200670028	G	A	12	4	16	0.75	0.536663	1	0.0101681	0.0904623	0.0503152	TRUE	ARGFX
152	rs675740	chr12	29783867	G	A	12	6	18	0.666667	0.536663	0	0.987814	0.998463	0.993139	TRUE	ARGFX
153	rs687351	chr8	60652088	A	C	10	10	20	0.5	0.536663	0.25	0.584061	0.895907	0.739984	FALSE	ARGFX
154	rs6956825	chr7	127392753	C	G	18	4	22	0.818182	0.536663	0.833333	0.246344	0.704044	0.475194	FALSE	ARGFX
155	rs710623	chr12	67270198	T	G	10	14	24	0.416667	0.536663	0	0.969809	0.991844	0.980827	TRUE	ARGFX
156	rs71579276	chr12	4809215	C	A	8	2	10	0.8	0.536663	1	0.00513427	0.208074	0.106604	TRUE	ARGFX
157	rs7162815	chr15	90000811	A	C	4	6	10	0.4	0.536663	1	0.00209329	0.0255817	0.0138375	TRUE	ARGFX
158	rs7201783	chr16	27228193	C	G	4	4	8	0.5	0.536663	0.5	0.248195	0.75481	0.501502	FALSE	ARGFX
159	rs7239625	chr18	58864068	C	T	2	10	12	0.166667	0.536663	0	0.839585	0.989613	0.914599	TRUE	ARGFX
160	rs727544	chr7	101936723	A	G	4	10	14	0.285714	0.536663	0	0.919	0.993865	0.956432	TRUE	ARGFX
161	rs7281778	chr21	44049768	G	A	2	14	16	0.125	0.536663	0	0.786568	0.98432	0.885444	TRUE	ARGFX
162	rs7284966	chr22	38756407	A	G	14	8	22	0.636364	0.536663	0.666667	0.292541	0.66359	0.478066	FALSE	ARGFX
163	rs7311692	chr12	25251404	C	G	4	22	26	0.153846	0.536663	0.25	0.204039	0.615271	0.409655	FALSE	ARGFX
164	rs73153494	chr7	131422345	C	T	6	8	14	0.428571	0.536663	0	0.964115	0.997093	0.980604	TRUE	ARGFX
165	rs7321798	chr13	99980760	G	C	6	6	12	0.5	0.536663	0.333333	0.428368	0.853259	0.640814	FALSE	ARGFX
166	rs73368140	chr17	82309230	C	T	4	6	10	0.4	0.536663	0	0.947757	0.995791	0.971774	TRUE	ARGFX
167	rs746761	chr11	36431956	T	C	6	8	14	0.428571	0.536663	0.5	0.225758	0.663905	0.444832	FALSE	ARGFX
168	rs7551834	chr1	31715271	G	A	4	10	14	0.285714	0.536663	0.5	0.143107	0.558342	0.350725	FALSE	ARGFX
169	rs7567240	chr2	196593642	G	A	12	14	26	0.461538	0.536663	0.333333	0.477966	0.799812	0.638889	FALSE	ARGFX
170	rs75820577	chr7	98617412	C	A	8	10	18	0.444444	0.536663	0.4	0.348391	0.739494	0.543942	FALSE	ARGFX
171	rs7592689	chr2	113756521	A	C	6	12	18	0.333333	0.536663	0.333333	0.317296	0.72445	0.520873	FALSE	ARGFX
172	rs77154445	chr19	41822388	C	A	8	2	10	0.8	0.536663	1	0.00513427	0.208074	0.106604	TRUE	ARGFX
173	rs7809993	chr7	117873610	C	G	2	6	8	0.25	0.536663	1	0.0026838	0.0151048	0.00889429	TRUE	ARGFX
174	rs79378930	chr16	1379382	C	A	14	16	30	0.466667	0.536663	1	0.00534172	0.0180889	0.0117153	TRUE	ARGFX
175	rs7986488	chr13	36348221	G	A	2	12	14	0.142857	0.536663	0	0.823931	0.989804	0.906868	TRUE	ARGFX
176	rs8103241	chr19	13011798	A	G	6	8	14	0.428571	0.536663	1	0.0042748	0.0222532	0.013264	TRUE	ARGFX
177	rs855611	chr19	38036826	G	C	14	6	20	0.7	0.536663	0.666667	0.338879	0.744114	0.541497	FALSE	ARGFX
178	rs887314	chr11	64285685	T	G	10	8	18	0.555556	0.536663	0.8	0.132424	0.444086	0.288255	FALSE	ARGFX
179	rs932816	chr1	46394077	G	A	8	4	12	0.666667	0.536663	0.666667	0.27392	0.753868	0.513894	FALSE	ARGFX
180	rs9524677	chr13	94923632	C	T	2	8	10	0.2	0.536663	0.5	0.0880027	0.516065	0.302034	FALSE	ARGFX
181	rs9566108	chr13	36346367	C	T	16	14	30	0.533333	0.536663	0.25	0.636199	0.871121	0.75366	TRUE	ARGFX
182	rs9841443	chr3	169812288	C	A	6	6	12	0.5	0.536663	0	0.970375	0.997125	0.98375	TRUE	ARGFX
183	rs988069	chr20	19206071	A	C	4	8	12	0.333333	0.536663	0.5	0.148573	0.604514	0.376544	FALSE	ARGFX
184	rs9975155	chr21	33403846	T	G	18	2	20	0.9	0.536663	1	0.0204184	0.298586	0.159502	TRUE	ARGFX
1	rs111381845	chr1	195269384	C	T	2	4	6	0.333333	0.476923	0.5	0.126715	0.66376	0.395238	FALSE	ARID5B
2	rs116611192	chr1	67621008	T	C	2	4	6	0.333333	0.476923	0	0.874627	0.996902	0.935764	TRUE	ARID5B
3	rs2431457	chr19	34936466	T	C	2	4	6	0.333333	0.476923	1	0.000977599	0.0251881	0.0130828	TRUE	ARID5B
4	rs458056	chr12	65039594	C	T	2	2	4	0.5	0.476923	1	0.000951076	0.0744186	0.0376849	TRUE	ARID5B
5	rs79284424	chr9	97028860	G	A	8	2	10	0.8	0.476923	1	0.00785063	0.167784	0.0878172	TRUE	ARID5B
1	rs10426850	chr19	35827020	G	A	20	2	22	0.909091	0.570138	1	0.0249528	0.321072	0.173013	TRUE	BAZ2A
2	rs112355147	chrX	78135525	G	T	12	4	16	0.75	0.570138	1	0.00951586	0.0942625	0.0518892	TRUE	BAZ2A
3	rs146506777	chrX	132422816	G	A	26	2	28	0.928571	0.570138	1	0.0290465	0.36186	0.195453	TRUE	BAZ2A
4	rs147113051	chrX	75686616	A	G	14	2	16	0.875	0.570138	1	0.017826	0.289539	0.153683	TRUE	BAZ2A
5	rs188751810	chr19	44245866	G	A	30	2	32	0.9375	0.570138	1	0.0273436	0.38643	0.206887	TRUE	BAZ2A
6	rs189308601	chrX	126970496	C	T	20	2	22	0.909091	0.570138	1	0.0249528	0.321072	0.173013	TRUE	BAZ2A
7	rs2150413	chr21	39242952	C	T	6	12	18	0.333333	0.570138	1	0.00227289	0.012207	0.00723992	TRUE	BAZ2A
8	rs2222960	chr21	35606348	C	T	12	12	24	0.5	0.570138	0	0.978106	0.994798	0.986452	TRUE	BAZ2A
9	rs2231569	chr19	36114973	G	T	32	4	36	0.888889	0.570138	1	0.0283351	0.202627	0.115481	TRUE	BAZ2A
10	rs2246697	chr21	45270084	G	A	18	2	20	0.9	0.570138	0.666667	0.558384	0.938193	0.748288	FALSE	BAZ2A
11	rs2835589	chr21	37091042	A	G	16	4	20	0.8	0.570138	1	0.0156728	0.117817	0.0667449	TRUE	BAZ2A
12	rs35048950	chr21	42120845	C	T	14	10	24	0.583333	0.570138	0	0.984027	0.995896	0.989961	TRUE	BAZ2A
13	rs4828466	chrX	87482229	C	T	8	10	18	0.444444	0.570138	1	0.00438244	0.0180277	0.0112051	TRUE	BAZ2A
14	rs5968443	chrX	85089243	A	G	10	8	18	0.555556	0.570138	0	0.98187	0.996603	0.989236	TRUE	BAZ2A
15	rs59839663	chr21	33007650	C	T	2	12	14	0.142857	0.570138	0.5	0.0656464	0.430443	0.248045	FALSE	BAZ2A
16	rs77389705	chr19	37788873	G	A	14	2	16	0.875	0.570138	1	0.017826	0.289539	0.153683	TRUE	BAZ2A
17	rs8130320	chr21	39208332	G	A	12	16	28	0.428571	0.570138	1	0.00381962	0.0152686	0.0095441	TRUE	BAZ2A
1	rs10744685	chr12	5499858	G	T	8	4	12	0.666667	0.554509	1	0.00729549	0.0714603	0.0393779	TRUE	BHLHA15
2	rs130386	chr22	42686472	G	C	20	10	30	0.666667	0.554509	0.8	0.203898	0.509624	0.356761	FALSE	BHLHA15
3	rs1395247	chr1	63747221	T	C	10	26	36	0.277778	0.554509	0.5	0.165865	0.439187	0.302526	FALSE	BHLHA15
4	rs1637930	chr1	230564894	A	G	6	12	18	0.333333	0.554509	0.666667	0.0951061	0.400535	0.247821	FALSE	BHLHA15
5	rs17105195	chr14	77032936	G	A	6	6	12	0.5	0.554509	0.5	0.287169	0.759888	0.523528	FALSE	BHLHA15
6	rs1772849	chr1	201311035	G	A	4	12	16	0.25	0.554509	1	0.00134613	0.0105032	0.00592465	TRUE	BHLHA15
7	rs1868214	chr3	125585621	C	G	10	18	28	0.357143	0.554509	0.333333	0.360107	0.70543	0.532768	FALSE	BHLHA15
8	rs2356271	chr16	20870916	T	C	14	8	22	0.636364	0.554509	1	0.00821105	0.0391173	0.0236642	TRUE	BHLHA15
9	rs2791725	chr9	130732569	G	A	18	2	20	0.9	0.554509	1	0.0229232	0.315216	0.16907	TRUE	BHLHA15
10	rs289588	chr8	13404277	A	G	12	2	14	0.857143	0.554509	1	0.015036	0.247402	0.131219	TRUE	BHLHA15
11	rs3764189	chr15	76012301	C	T	8	16	24	0.333333	0.554509	0.5	0.197963	0.53822	0.368091	FALSE	BHLHA15
12	rs3879742	chr18	3482215	G	A	8	24	32	0.25	0.554509	0.5	0.147731	0.431183	0.289457	FALSE	BHLHA15
13	rs4148111	chr21	42228825	G	C	18	4	22	0.818182	0.554509	1	0.0178545	0.12191	0.0698821	TRUE	BHLHA15
14	rs4241409	chr3	49459197	C	A	2	6	8	0.25	0.554509	0	0.878919	0.995165	0.937042	TRUE	BHLHA15
15	rs4326846	chr12	53829544	G	A	4	24	28	0.142857	0.554509	0	0.863582	0.979947	0.921765	TRUE	BHLHA15
16	rs60605633	chr21	45995188	G	A	12	2	14	0.857143	0.554509	1	0.015036	0.247402	0.131219	TRUE	BHLHA15
17	rs62048414	chr16	85028924	G	A	14	16	30	0.466667	0.554509	1	0.00470767	0.0162803	0.010494	TRUE	BHLHA15
18	rs6467906	chr7	82559654	A	G	22	8	30	0.733333	0.554509	0.25	0.791641	0.939837	0.865739	TRUE	BHLHA15
19	rs6684378	chr1	228864705	A	G	30	8	38	0.789474	0.554509	0.666667	0.472126	0.798713	0.63542	FALSE	BHLHA15
20	rs7212406	chr17	78717841	G	A	14	10	24	0.583333	0.554509	0.25	0.676259	0.907612	0.791936	TRUE	BHLHA15
21	rs7227237	chr18	49648309	C	T	12	2	14	0.857143	0.554509	1	0.015036	0.247402	0.131219	TRUE	BHLHA15
22	rs72696094	chr1	114524608	T	C	10	16	26	0.384615	0.554509	0.333333	0.378369	0.73053	0.554449	FALSE	BHLHA15
23	rs73729539	chr7	138000262	A	C	20	4	24	0.833333	0.554509	0.5	0.648594	0.931626	0.79011	TRUE	BHLHA15
24	rs755167	chr20	62915298	C	T	12	8	20	0.6	0.554509	0.2	0.729115	0.93395	0.831533	TRUE	BHLHA15
25	rs76275767	chr6	90353818	C	A	26	2	28	0.928571	0.554509	1	0.0264699	0.351361	0.188916	TRUE	BHLHA15
26	rs7972549	chr12	24713270	A	G	10	8	18	0.555556	0.554509	1	0.00523335	0.0334155	0.0193244	TRUE	BHLHA15
27	rs7988241	chr13	98766207	A	G	10	2	12	0.833333	0.554509	1	0.0124118	0.228102	0.120257	TRUE	BHLHA15
28	rs831745	chr1	201161158	T	A	8	18	26	0.307692	0.554509	0.5	0.177472	0.505977	0.341725	FALSE	BHLHA15
1	rs8030996	chr15	67739068	C	G	6	6	12	0.5	0.5	0	0.965497	0.995944	0.980721	TRUE	CEBPD
1	rs1005565	chr14	73943421	T	C	12	2	14	0.857143	0.548207	0	0.993437	0.999661	0.996549	TRUE	CEBPG
2	rs10128856	chr12	101827259	A	G	12	20	32	0.375	0.548207	0.333333	0.399568	0.722492	0.56103	FALSE	CEBPG
3	rs10230610	chr7	124785344	A	C	6	14	20	0.3	0.548207	0.75	0.0609575	0.270871	0.165914	TRUE	CEBPG
4	rs1025734	chr2	223970652	C	T	6	14	20	0.3	0.548207	0.571429	0.130862	0.457968	0.294415	FALSE	CEBPG
5	rs10454860	chr5	34736918	G	A	10	6	16	0.625	0.548207	0.25	0.665705	0.925399	0.795552	TRUE	CEBPG
6	rs10490748	chr2	206708331	T	G	6	16	22	0.272727	0.548207	0.25	0.348936	0.737769	0.543352	FALSE	CEBPG
7	rs10782758	chr1	81414504	A	G	14	24	38	0.368421	0.548207	0.4	0.341356	0.634788	0.488072	FALSE	CEBPG
8	rs10803961	chr2	182862201	A	G	10	14	24	0.416667	0.548207	1	0.0042568	0.0143433	0.00930004	TRUE	CEBPG
9	rs112299555	chr1	43650520	C	T	10	14	24	0.416667	0.548207	0.222222	0.540461	0.843508	0.691984	FALSE	CEBPG
10	rs113037117	chr13	36951878	G	A	20	4	24	0.833333	0.548207	1	0.018016	0.125019	0.0715174	TRUE	CEBPG
11	rs113239956	chr1	27119400	C	A	16	2	18	0.888889	0.548207	1	0.0194719	0.292585	0.156028	TRUE	CEBPG
12	rs113569979	chr12	116955853	A	G	32	20	52	0.615385	0.548207	0.5	0.491239	0.733837	0.612538	FALSE	CEBPG
13	rs1143857	chrX	145610150	A	C	8	6	14	0.571429	0.548207	0.5	0.350205	0.780937	0.565571	FALSE	CEBPG
14	rs11624967	chr14	73760543	G	A	16	8	24	0.666667	0.548207	0.5	0.482986	0.820126	0.651556	FALSE	CEBPG
15	rs116694137	chr17	82335620	A	C	8	10	18	0.444444	0.548207	0.333333	0.432125	0.811244	0.621684	FALSE	CEBPG
16	rs11671542	chr19	44212378	G	T	56	16	72	0.777778	0.548207	0.7	0.461017	0.725585	0.593301	FALSE	CEBPG
17	rs116893322	chr15	84981397	G	A	8	22	30	0.266667	0.548207	0.5	0.158002	0.455148	0.306575	FALSE	CEBPG
18	rs11718944	chr3	57680232	G	C	4	16	20	0.2	0.548207	0.5	0.100712	0.424402	0.262557	FALSE	CEBPG
19	rs11865749	chr16	667971	C	G	22	8	30	0.733333	0.548207	0.6	0.471858	0.80793	0.639894	FALSE	CEBPG
20	rs12060237	chr1	15524461	G	C	34	14	48	0.708333	0.548207	0.75	0.320946	0.599589	0.460268	FALSE	CEBPG
21	rs12274420	chr11	26754058	A	G	26	28	54	0.481481	0.548207	0.5	0.365877	0.616949	0.491413	FALSE	CEBPG
22	rs12330648	chr3	71168218	T	C	12	14	26	0.461538	0.548207	0	0.975053	0.993959	0.984506	TRUE	CEBPG
23	rs12473347	chr2	208201827	T	C	2	6	8	0.25	0.548207	0	0.876764	0.995077	0.93592	TRUE	CEBPG
24	rs12558286	chrX	86806955	C	T	14	22	36	0.388889	0.548207	0.5	0.26668	0.557947	0.412314	FALSE	CEBPG
25	rs12624686	chr20	33909642	C	T	8	8	16	0.5	0.548207	1	0.00422942	0.0247353	0.0144824	TRUE	CEBPG
26	rs12734523	chr1	183735265	T	G	30	10	40	0.75	0.548207	0	0.99317	0.997588	0.995379	TRUE	CEBPG
27	rs12805083	chr11	7513260	G	A	10	4	14	0.714286	0.548207	0.5	0.461929	0.873736	0.667833	FALSE	CEBPG
28	rs12920514	chr16	28824579	G	A	14	8	22	0.636364	0.548207	0.5	0.440725	0.802688	0.621706	FALSE	CEBPG
29	rs13044668	chr20	10314317	T	C	10	6	16	0.625	0.548207	1	0.00777459	0.0462494	0.027012	TRUE	CEBPG
30	rs1330718	chr11	31246640	A	C	2	22	24	0.0833333	0.548207	0.5	0.0342401	0.26792	0.15108	TRUE	CEBPG
31	rs13361707	chr5	40791782	C	T	6	36	42	0.142857	0.548207	0.2	0.253388	0.602278	0.427833	FALSE	CEBPG
32	rs1388941	chr8	19757960	A	G	24	20	44	0.545455	0.548207	0.8	0.150986	0.34841	0.249698	TRUE	CEBPG
33	rs139717021	chr12	123351540	G	C	18	8	26	0.692308	0.548207	0	0.991433	0.998048	0.994741	TRUE	CEBPG
34	rs144010570	chr5	43573335	C	T	20	2	22	0.909091	0.548207	0.666667	0.576817	0.938445	0.757631	FALSE	CEBPG
35	rs148506022	chr2	104853785	C	A	4	32	36	0.111111	0.548207	1	0.00119926	0.00361559	0.00240743	TRUE	CEBPG
36	rs1506074	chr1	225044562	G	T	16	10	26	0.615385	0.548207	0.6	0.333215	0.685431	0.509323	FALSE	CEBPG
37	rs1533800	chr11	33802952	T	G	22	14	36	0.611111	0.548207	0.25	0.701214	0.889811	0.795512	TRUE	CEBPG
38	rs1574213	chr15	98684558	G	A	14	28	42	0.333333	0.548207	0.5	0.213931	0.488405	0.351168	FALSE	CEBPG
39	rs1629783	chr14	69101439	C	G	8	14	22	0.363636	0.548207	0	0.956888	0.991477	0.974182	TRUE	CEBPG
40	rs1634605	chr7	84410449	C	A	6	14	20	0.3	0.548207	1	0.00161331	0.0100993	0.00585632	TRUE	CEBPG
41	rs16838414	chr3	132038396	G	C	6	12	18	0.333333	0.548207	0	0.948091	0.993999	0.971045	TRUE	CEBPG
42	rs16856737	chr1	232288160	G	A	22	6	28	0.785714	0.548207	1	0.01538	0.0855255	0.0504528	TRUE	CEBPG
43	rs16872356	chr7	107680666	G	A	14	6	20	0.7	0.548207	0.666667	0.320554	0.726258	0.523406	FALSE	CEBPG
44	rs1749327	chr10	44753263	T	A	26	2	28	0.928571	0.548207	1	0.0336345	0.350385	0.19201	TRUE	CEBPG
45	rs17525614	chr2	9539725	T	C	6	12	18	0.333333	0.548207	0.666667	0.0935647	0.39621	0.244887	TRUE	CEBPG
46	rs17783630	chr14	92489041	A	C	16	10	26	0.615385	0.548207	0.4	0.532298	0.836494	0.684396	FALSE	CEBPG
47	rs1791371	chr18	3652972	A	G	6	8	14	0.428571	0.548207	0	0.965186	0.995631	0.980408	TRUE	CEBPG
48	rs183603528	chr2	205680301	G	T	28	2	30	0.933333	0.548207	1	0.0370935	0.36722	0.202157	TRUE	CEBPG
49	rs184588010	chr12	111313943	G	T	28	26	54	0.518519	0.548207	0.625	0.283708	0.530176	0.406942	FALSE	CEBPG
50	rs189714781	chr12	52372563	C	A	26	2	28	0.928571	0.548207	1	0.0336345	0.350385	0.19201	TRUE	CEBPG
51	rs191983163	chr17	75128169	G	A	18	8	26	0.692308	0.548207	0.5	0.523104	0.846011	0.684557	FALSE	CEBPG
52	rs192432092	chr15	67998981	C	T	30	2	32	0.9375	0.548207	1	0.0457826	0.387483	0.216633	TRUE	CEBPG
53	rs1966530	chr2	159620897	G	A	14	8	22	0.636364	0.548207	0	0.986587	0.997126	0.991857	TRUE	CEBPG
54	rs1984069	chr1	3419636	C	T	8	16	24	0.333333	0.548207	0	0.956042	0.990106	0.973074	TRUE	CEBPG
55	rs2036764	chr17	48510969	C	T	6	12	18	0.333333	0.548207	0.5	0.18593	0.580583	0.383256	FALSE	CEBPG
56	rs2041527	chr7	118185780	A	G	6	12	18	0.333333	0.548207	0.333333	0.324359	0.72932	0.526839	FALSE	CEBPG
57	rs2143491	chr20	47599923	G	A	36	6	42	0.857143	0.548207	1	0.0231664	0.125629	0.0743976	TRUE	CEBPG
58	rs2150284	chr7	139017279	T	C	36	10	46	0.782609	0.548207	0.4	0.72559	0.902259	0.813925	TRUE	CEBPG
59	rs2158126	chr7	112104559	A	C	16	18	34	0.470588	0.548207	0.666667	0.203806	0.469281	0.336544	FALSE	CEBPG
60	rs2206656	chr20	50513582	C	G	20	10	30	0.666667	0.548207	0.5	0.506812	0.817389	0.662101	FALSE	CEBPG
61	rs2281004	chr1	171137792	A	G	4	12	16	0.25	0.548207	0	0.914275	0.991846	0.953061	TRUE	CEBPG
62	rs2358817	chr1	117148136	C	T	10	12	22	0.454545	0.548207	0.5	0.297359	0.658438	0.477898	FALSE	CEBPG
63	rs2403172	chr14	103368083	C	G	2	8	10	0.2	0.548207	0	0.862152	0.990706	0.926429	TRUE	CEBPG
64	rs2436608	chr12	105987544	C	T	16	6	22	0.727273	0.548207	1	0.0108392	0.069667	0.0402531	TRUE	CEBPG
65	rs2565675	chr12	19432926	T	C	6	12	18	0.333333	0.548207	0.333333	0.324359	0.72932	0.526839	FALSE	CEBPG
66	rs2620073	chr17	73875522	C	T	14	12	26	0.538462	0.548207	1	0.00605843	0.0217219	0.0138902	TRUE	CEBPG
67	rs2666846	chr1	214592113	A	G	16	4	20	0.8	0.548207	0.666667	0.423289	0.822026	0.622658	FALSE	CEBPG
68	rs2823602	chr21	16079956	T	G	6	16	22	0.272727	0.548207	0	0.932497	0.989492	0.960994	TRUE	CEBPG
69	rs282571	chr13	112711920	C	G	18	4	22	0.818182	0.548207	1	0.016153	0.126113	0.071133	TRUE	CEBPG
70	rs28546995	chr14	75536121	C	G	2	8	10	0.2	0.548207	1	0.00151035	0.0107233	0.00611683	TRUE	CEBPG
71	rs3095422	chr1	187764334	A	G	18	4	22	0.818182	0.548207	1	0.016153	0.126113	0.071133	TRUE	CEBPG
72	rs34085021	chr7	43525859	G	A	6	8	14	0.428571	0.548207	0	0.965186	0.995631	0.980408	TRUE	CEBPG
73	rs34148610	chr18	62720701	C	G	18	2	20	0.9	0.548207	0.5	0.706449	0.970679	0.838564	TRUE	CEBPG
74	rs34161369	chr1	214282041	G	T	24	12	36	0.666667	0.548207	0.75	0.259679	0.568281	0.41398	FALSE	CEBPG
75	rs34721444	chr1	28418394	A	T	6	14	20	0.3	0.548207	0	0.940038	0.991001	0.965519	TRUE	CEBPG
76	rs35357440	chr1	244687832	T	C	14	6	20	0.7	0.548207	0	0.99054	0.997453	0.993996	TRUE	CEBPG
77	rs35787586	chr16	19067848	C	A	8	24	32	0.25	0.548207	0.3	0.293482	0.634742	0.464112	FALSE	CEBPG
78	rs369626835	chr2	238169969	A	C	12	2	14	0.857143	0.548207	1	0.015517	0.248858	0.132187	TRUE	CEBPG
79	rs370700870	chr3	61578230	C	A	18	2	20	0.9	0.548207	1	0.0184467	0.309603	0.164025	TRUE	CEBPG
80	rs371612614	chr8	30643658	T	A	22	2	24	0.916667	0.548207	1	0.0223483	0.320886	0.171617	TRUE	CEBPG
81	rs373250099	chr12	46430716	T	A	16	2	18	0.888889	0.548207	1	0.0194719	0.292585	0.156028	TRUE	CEBPG
82	rs374111776	chr1	26387502	T	C	28	2	30	0.933333	0.548207	1	0.0370935	0.36722	0.202157	TRUE	CEBPG
83	rs375310584	chr15	68875988	T	C	40	2	42	0.952381	0.548207	1	0.04464	0.435162	0.239901	FALSE	CEBPG
84	rs3768324	chr1	39026790	C	T	38	12	50	0.76	0.548207	0.875	0.195626	0.458823	0.327224	FALSE	CEBPG
85	rs377162126	chrX	41330450	G	C	36	2	38	0.947368	0.548207	1	0.0491172	0.407932	0.228525	FALSE	CEBPG
86	rs3779326	chr7	78055406	G	A	12	14	26	0.461538	0.548207	0.5	0.308503	0.645881	0.477192	FALSE	CEBPG
87	rs41480152	chr3	45410131	C	T	20	22	42	0.47619	0.548207	1	0.00463309	0.0154419	0.0100375	TRUE	CEBPG
88	rs4346313	chr19	16886796	C	A	16	8	24	0.666667	0.548207	0.5	0.482986	0.820126	0.651556	FALSE	CEBPG
89	rs4594581	chr3	140203689	G	T	6	6	12	0.5	0.548207	0	0.969226	0.997517	0.983371	TRUE	CEBPG
90	rs4624325	chr2	148599300	T	C	26	2	28	0.928571	0.548207	1	0.0336345	0.350385	0.19201	TRUE	CEBPG
91	rs4732798	chr8	28003987	G	A	14	4	18	0.777778	0.548207	1	0.0106414	0.101449	0.0560454	TRUE	CEBPG
92	rs4787645	chr16	30446029	C	T	82	70	152	0.539474	0.548207	0.357143	0.615498	0.749832	0.682665	TRUE	CEBPG
93	rs4800713	chr18	26080046	A	G	4	18	22	0.181818	0.548207	0	0.877034	0.983551	0.930292	TRUE	CEBPG
94	rs4851439	chr2	101433802	A	G	10	8	18	0.555556	0.548207	0.333333	0.516329	0.852441	0.684385	FALSE	CEBPG
95	rs488766	chr11	121119530	A	G	8	28	36	0.222222	0.548207	0	0.928904	0.984938	0.956921	TRUE	CEBPG
96	rs4949718	chr1	76433779	T	C	12	4	16	0.75	0.548207	0.5	0.52182	0.897271	0.709545	FALSE	CEBPG
97	rs4980505	chr11	63872198	G	A	20	36	56	0.357143	0.548207	0	0.970045	0.989668	0.979856	TRUE	CEBPG
98	rs543589	chr1	66271377	A	C	18	16	34	0.529412	0.548207	0.6	0.292132	0.597003	0.444568	FALSE	CEBPG
99	rs55780735	chr16	69706471	A	G	14	18	32	0.4375	0.548207	1	0.00436414	0.0140967	0.0092304	TRUE	CEBPG
100	rs558900	chr22	27252447	G	C	8	18	26	0.307692	0.548207	1	0.00260667	0.0101771	0.00639189	TRUE	CEBPG
101	rs55912998	chr8	17204329	G	T	8	4	12	0.666667	0.548207	0	0.985339	0.997971	0.991655	TRUE	CEBPG
102	rs55954386	chr7	112462545	A	G	14	36	50	0.28	0.548207	0.25	0.405296	0.689704	0.5475	FALSE	CEBPG
103	rs56119017	chr16	1984136	C	T	12	2	14	0.857143	0.548207	1	0.015517	0.248858	0.132187	TRUE	CEBPG
104	rs57279772	chr12	56305176	G	A	10	6	16	0.625	0.548207	0	0.984909	0.996879	0.990894	TRUE	CEBPG
105	rs5757211	chr22	38655700	C	T	12	8	20	0.6	0.548207	0.5	0.41163	0.788642	0.600136	FALSE	CEBPG
106	rs5758989	chr22	42854563	C	T	6	4	10	0.6	0.548207	0	0.975453	0.996827	0.98614	TRUE	CEBPG
107	rs58726213	chr16	31033362	A	G	14	18	32	0.4375	0.548207	0.6	0.228733	0.513532	0.371133	FALSE	CEBPG
108	rs59016952	chr3	182713893	C	A	12	12	24	0.5	0.548207	0.666667	0.204548	0.527429	0.365988	FALSE	CEBPG
109	rs5909725	chrX	120486278	C	T	22	2	24	0.916667	0.548207	0.666667	0.601198	0.94444	0.772819	TRUE	CEBPG
110	rs59440035	chr11	19770014	C	G	4	8	12	0.333333	0.548207	0.5	0.171812	0.627758	0.399785	FALSE	CEBPG
111	rs59610400	chr3	170149472	A	C	12	2	14	0.857143	0.548207	0.5	0.612867	0.960306	0.786586	TRUE	CEBPG
112	rs5993657	chr22	19504472	T	A	8	6	14	0.571429	0.548207	0.333333	0.507052	0.878927	0.692989	FALSE	CEBPG
113	rs5997893	chr22	31160117	A	G	10	28	38	0.263158	0.548207	0.5	0.1544	0.423743	0.289072	FALSE	CEBPG
114	rs6031849	chr20	44885696	G	T	8	20	28	0.285714	0.548207	0	0.940239	0.98866	0.964449	TRUE	CEBPG
115	rs60833213	chr18	58045108	G	A	4	24	28	0.142857	0.548207	0	0.867652	0.981983	0.924818	TRUE	CEBPG
116	rs60987792	chr1	32265068	G	A	10	2	12	0.833333	0.548207	0	0.992093	0.999445	0.995769	TRUE	CEBPG
117	rs6142152	chr20	34373071	T	A	2	22	24	0.0833333	0.548207	0.4	0.0638398	0.376247	0.220043	TRUE	CEBPG
118	rs62111900	chr19	13789245	A	G	14	8	22	0.636364	0.548207	0.333333	0.613547	0.89367	0.753608	TRUE	CEBPG
119	rs62234272	chr22	43153254	G	A	28	12	40	0.7	0.548207	1	0.0134269	0.0424716	0.0279492	TRUE	CEBPG
120	rs62273861	chr3	156817478	G	T	2	20	22	0.0909091	0.548207	0	0.747594	0.979349	0.863471	TRUE	CEBPG
121	rs6660782	chr1	231038158	A	G	2	28	30	0.0666667	0.548207	0	0.705037	0.965802	0.83542	TRUE	CEBPG
122	rs6667180	chr1	167553951	T	A	12	10	22	0.545455	0.548207	0.666667	0.224793	0.573793	0.399293	FALSE	CEBPG
123	rs6711640	chr2	147709985	A	G	2	12	14	0.142857	0.548207	0	0.827567	0.988415	0.907991	TRUE	CEBPG
124	rs6753444	chr2	169709475	T	G	6	12	18	0.333333	0.548207	0.5	0.18593	0.580583	0.383256	FALSE	CEBPG
125	rs6783790	chr3	149657502	G	A	20	16	36	0.555556	0.548207	0	0.986793	0.99543	0.991112	TRUE	CEBPG
126	rs708590	chr17	15913345	T	C	4	10	14	0.285714	0.548207	1	0.00206769	0.014123	0.00809537	TRUE	CEBPG
127	rs709130	chr3	192957660	A	G	8	6	14	0.571429	0.548207	0.5	0.350205	0.780937	0.565571	FALSE	CEBPG
128	rs72751292	chr15	96355273	A	G	18	8	26	0.692308	0.548207	0.5	0.523104	0.846011	0.684557	FALSE	CEBPG
129	rs7304105	chr12	68787698	G	A	18	12	30	0.6	0.548207	0	0.987049	0.995556	0.991302	TRUE	CEBPG
130	rs73066935	chr3	182982767	A	C	8	4	12	0.666667	0.548207	1	0.00757036	0.0724413	0.0400058	TRUE	CEBPG
131	rs73155184	chr7	82384824	T	C	2	14	16	0.125	0.548207	1	0.00107286	0.00690482	0.00398884	TRUE	CEBPG
132	rs73169412	chr13	38951770	G	A	6	20	26	0.230769	0.548207	0.333333	0.235308	0.595864	0.415586	FALSE	CEBPG
133	rs733139	chr22	42994077	A	T	12	4	16	0.75	0.548207	0.333333	0.666291	0.931769	0.79903	TRUE	CEBPG
134	rs7341580	chr8	37621500	G	A	14	6	20	0.7	0.548207	1	0.0102106	0.0590239	0.0346173	TRUE	CEBPG
135	rs74282855	chr3	16534135	C	G	28	2	30	0.933333	0.548207	1	0.0370935	0.36722	0.202157	TRUE	CEBPG
136	rs74341300	chr7	64307493	T	G	8	6	14	0.571429	0.548207	0	0.978269	0.996498	0.987383	TRUE	CEBPG
137	rs75088972	chr14	50008891	G	C	6	4	10	0.6	0.548207	1	0.00480328	0.0591904	0.0319969	TRUE	CEBPG
138	rs75363167	chr16	57945877	G	T	16	28	44	0.363636	0.548207	0.5	0.241204	0.51602	0.378612	FALSE	CEBPG
139	rs757383	chr17	31269027	C	G	6	8	14	0.428571	0.548207	0.333333	0.395436	0.805326	0.600381	FALSE	CEBPG
140	rs757693	chr7	44848430	G	A	34	52	86	0.395349	0.548207	0.5	0.299534	0.494466	0.397	FALSE	CEBPG
141	rs7585985	chr2	45871469	T	C	6	8	14	0.428571	0.548207	0.5	0.228211	0.66637	0.44729	FALSE	CEBPG
142	rs7614823	chr3	54263158	G	A	8	14	22	0.363636	0.548207	0	0.956888	0.991477	0.974182	TRUE	CEBPG
143	rs76719591	chr11	130324236	T	G	18	2	20	0.9	0.548207	1	0.0184467	0.309603	0.164025	TRUE	CEBPG
144	rs77614079	chr1	151164913	G	A	26	22	48	0.541667	0.548207	0.833333	0.116882	0.289049	0.202966	TRUE	CEBPG
145	rs778152	chr2	61381405	C	A	14	12	26	0.538462	0.548207	0.333333	0.538684	0.838959	0.688821	FALSE	CEBPG
146	rs78018127	chr2	140863882	A	C	30	2	32	0.9375	0.548207	1	0.0457826	0.387483	0.216633	TRUE	CEBPG
147	rs78028661	chr12	64408672	T	G	26	2	28	0.928571	0.548207	0.5	0.772463	0.970149	0.871306	TRUE	CEBPG
148	rs78158530	chr1	93759143	C	A	8	10	18	0.444444	0.548207	0.333333	0.432125	0.811244	0.621684	FALSE	CEBPG
149	rs787525	chr1	67576698	G	C	8	18	26	0.307692	0.548207	1	0.00260667	0.0101771	0.00639189	TRUE	CEBPG
150	rs79693979	chr3	177452687	G	A	10	26	36	0.277778	0.548207	0.5	0.174505	0.443201	0.308853	FALSE	CEBPG
151	rs7983724	chr13	73732487	A	T	4	8	12	0.333333	0.548207	0	0.933331	0.994256	0.963793	TRUE	CEBPG
152	rs79973623	chr16	66899833	G	A	46	6	52	0.884615	0.548207	0.666667	0.633795	0.892635	0.763215	TRUE	CEBPG
153	rs8027781	chr15	65805373	C	A	26	20	46	0.565217	0.548207	0.75	0.203258	0.439569	0.321413	FALSE	CEBPG
154	rs8060520	chr16	13957919	C	G	8	22	30	0.266667	0.548207	0.666667	0.0895506	0.292201	0.190876	TRUE	CEBPG
155	rs8089831	chr18	21599251	T	C	4	22	26	0.153846	0.548207	0.333333	0.158529	0.51778	0.338154	FALSE	CEBPG
156	rs8105571	chr19	44006189	C	T	38	2	40	0.95	0.548207	1	0.0422784	0.414936	0.228607	FALSE	CEBPG
157	rs935714	chr17	73212014	G	A	14	18	32	0.4375	0.548207	1	0.00436414	0.0140967	0.0092304	TRUE	CEBPG
158	rs9889349	chr17	2633225	T	A	30	6	36	0.833333	0.548207	0	0.996508	0.998925	0.997717	TRUE	CEBPG
159	rs9899860	chr17	35614101	C	T	6	10	16	0.375	0.548207	0.75	0.0778636	0.356984	0.217424	TRUE	CEBPG
1	rs1009156	chr22	46538704	G	A	18	8	26	0.692308	0.540514	0	0.991433	0.998048	0.994741	TRUE	CPHXL
2	rs10146759	chr14	24429988	C	T	10	6	16	0.625	0.540514	1	0.00738973	0.0428173	0.0251035	TRUE	CPHXL
3	rs1019505	chr5	37731257	T	A	2	10	12	0.166667	0.540514	0	0.837775	0.988724	0.91325	TRUE	CPHXL
4	rs10225507	chr7	27130964	C	T	12	12	24	0.5	0.540514	1	0.00628792	0.0196373	0.0129626	TRUE	CPHXL
5	rs10407367	chr19	47274964	A	C	14	2	16	0.875	0.540514	1	0.0175266	0.277733	0.14763	TRUE	CPHXL
6	rs10417381	chr19	3036352	T	C	16	16	32	0.5	0.540514	1	0.00595625	0.0181925	0.0120744	TRUE	CPHXL
7	rs10423795	chr19	49019831	C	T	2	4	6	0.333333	0.540514	0	0.902248	0.996544	0.949396	TRUE	CPHXL
8	rs1044677	chr12	49867042	T	C	8	6	14	0.571429	0.540514	0.75	0.161763	0.560327	0.361045	FALSE	CPHXL
9	rs1047616	chr17	27315496	G	A	4	6	10	0.4	0.540514	0	0.949155	0.995736	0.972445	TRUE	CPHXL
10	rs10511998	chr9	71682329	A	G	6	2	8	0.75	0.540514	1	0.00587372	0.175732	0.0908027	TRUE	CPHXL
11	rs1065497	chr22	28884003	C	T	16	4	20	0.8	0.540514	0	0.993198	0.998948	0.996073	TRUE	CPHXL
12	rs10773828	chr12	130838897	C	T	12	8	20	0.6	0.540514	0	0.984729	0.996324	0.990527	TRUE	CPHXL
13	rs10774481	chr12	991471	G	C	16	8	24	0.666667	0.540514	0.6	0.399468	0.744262	0.571865	FALSE	CPHXL
14	rs1079357	chr20	62386856	A	T	8	24	32	0.25	0.540514	0.4	0.201269	0.525537	0.363403	FALSE	CPHXL
15	rs10842799	chr12	26832162	C	T	12	4	16	0.75	0.540514	1	0.0118979	0.0908331	0.0513655	TRUE	CPHXL
16	rs10849779	chr12	120702983	A	G	2	8	10	0.2	0.540514	0.5	0.087465	0.516211	0.301838	FALSE	CPHXL
17	rs10854161	chr19	17794810	A	G	6	8	14	0.428571	0.540514	0	0.964115	0.997093	0.980604	TRUE	CPHXL
18	rs10859991	chr12	95942616	G	C	10	16	26	0.384615	0.540514	0.166667	0.61336	0.884678	0.749019	TRUE	CPHXL
19	rs10893507	chr11	126416693	A	C	2	6	8	0.25	0.540514	0	0.878638	0.995965	0.937302	TRUE	CPHXL
20	rs10915962	chr1	226223616	C	T	10	22	32	0.3125	0.540514	0	0.95417	0.990541	0.972356	TRUE	CPHXL
21	rs11032535	chr11	34174731	G	C	6	6	12	0.5	0.540514	0.333333	0.428577	0.84888	0.638728	FALSE	CPHXL
22	rs11073761	chr15	88109192	G	C	2	8	10	0.2	0.540514	0	0.856429	0.993479	0.924954	TRUE	CPHXL
23	rs11082011	chr18	37565159	C	T	2	8	10	0.2	0.540514	0	0.856429	0.993479	0.924954	TRUE	CPHXL
24	rs11108265	chr12	95790324	G	A	6	14	20	0.3	0.540514	0.75	0.0595294	0.271232	0.165381	TRUE	CPHXL
25	rs111308825	chr19	33622079	G	A	32	4	36	0.888889	0.540514	0.875	0.300745	0.726381	0.513563	FALSE	CPHXL
26	rs111344771	chr1	111990024	G	A	8	14	22	0.363636	0.540514	1	0.00292021	0.012341	0.00763061	TRUE	CPHXL
27	rs111484016	chr16	58464080	G	T	8	14	22	0.363636	0.540514	0.6	0.153058	0.463839	0.308448	FALSE	CPHXL
28	rs111534123	chr14	56118291	T	G	10	2	12	0.833333	0.540514	1	0.011207	0.21836	0.114784	TRUE	CPHXL
29	rs111674074	chr19	2361374	G	C	8	2	10	0.8	0.540514	0	0.990316	0.999524	0.99492	TRUE	CPHXL
30	rs11170672	chr12	53739847	A	G	26	6	32	0.8125	0.540514	1	0.018531	0.09102	0.0547755	TRUE	CPHXL
31	rs111796090	chr21	31873380	G	A	4	20	24	0.166667	0.540514	0	0.877896	0.981514	0.929705	TRUE	CPHXL
32	rs11180823	chr12	76084161	A	C	4	8	12	0.333333	0.540514	0.8	0.0387081	0.293581	0.166145	TRUE	CPHXL
33	rs111959436	chr11	30585389	G	A	6	2	8	0.75	0.540514	1	0.00587372	0.175732	0.0908027	TRUE	CPHXL
34	rs11205707	chr1	50333190	G	A	14	42	56	0.25	0.540514	0	0.947702	0.984073	0.965888	TRUE	CPHXL
35	rs112087793	chr20	63652817	C	T	16	2	18	0.888889	0.540514	0.5	0.695988	0.973046	0.834517	TRUE	CPHXL
36	rs11209163	chr1	67833608	T	G	4	14	18	0.222222	0.540514	1	0.00165081	0.00775059	0.0047007	TRUE	CPHXL
37	rs112111321	chrX	132217514	G	A	2	8	10	0.2	0.540514	0	0.856429	0.993479	0.924954	TRUE	CPHXL
38	rs112114764	chr17	44123673	G	T	20	8	28	0.714286	0.540514	0.666667	0.377779	0.734034	0.555906	FALSE	CPHXL
39	rs112119401	chr12	53984333	C	T	6	14	20	0.3	0.540514	0.25	0.373744	0.768215	0.57098	FALSE	CPHXL
40	rs112137728	chr12	26125285	G	C	4	14	18	0.222222	0.540514	0.25	0.285935	0.723255	0.504595	FALSE	CPHXL
41	rs112146197	chr19	53103705	A	C	26	4	30	0.866667	0.540514	1	0.0181263	0.166231	0.0921787	TRUE	CPHXL
42	rs112299555	chr1	43650520	C	T	14	28	42	0.333333	0.540514	0.5	0.209705	0.487069	0.348387	FALSE	CPHXL
43	rs112342265	chr3	122681205	C	G	2	2	4	0.5	0.540514	1	0.00280527	0.0920524	0.0474288	TRUE	CPHXL
44	rs112359817	chr16	85027946	C	G	14	4	18	0.777778	0.540514	0.5	0.571358	0.914133	0.742746	FALSE	CPHXL
45	rs112408368	chr1	26827212	A	G	10	10	20	0.5	0.540514	0.714286	0.147983	0.472452	0.310218	FALSE	CPHXL
46	rs11248855	chr16	1126884	T	C	12	4	16	0.75	0.540514	0.666667	0.359871	0.816668	0.588269	FALSE	CPHXL
47	rs112522467	chr6	56843382	C	A	20	2	22	0.909091	0.540514	1	0.0277321	0.31788	0.172806	TRUE	CPHXL
48	rs112587865	chr7	975635	C	A	10	20	30	0.333333	0.540514	0.666667	0.12181	0.353704	0.237757	TRUE	CPHXL
49	rs112597118	chr17	80261121	G	A	18	2	20	0.9	0.540514	1	0.0165984	0.290481	0.153539	TRUE	CPHXL
50	rs112619223	chr7	138461033	C	T	22	16	38	0.578947	0.540514	1	0.00941398	0.0251537	0.0172838	TRUE	CPHXL
51	rs112997568	chr2	23940563	G	A	8	8	16	0.5	0.540514	0.333333	0.466881	0.844503	0.655692	FALSE	CPHXL
52	rs113059278	chr19	18941335	T	G	8	2	10	0.8	0.540514	0.666667	0.352051	0.848169	0.60011	FALSE	CPHXL
53	rs1132802	chr17	81703243	T	C	8	10	18	0.444444	0.540514	0.333333	0.41491	0.80413	0.60952	FALSE	CPHXL
54	rs113300592	chr17	82334349	T	C	2	20	22	0.0909091	0.540514	0.142857	0.214335	0.708566	0.461451	FALSE	CPHXL
55	rs113368091	chr12	51590852	C	A	12	18	30	0.4	0.540514	0.333333	0.421782	0.744269	0.583026	FALSE	CPHXL
56	rs113369180	chrX	16869874	G	C	10	4	14	0.714286	0.540514	1	0.00566184	0.0779808	0.0418213	TRUE	CPHXL
57	rs113458760	chr17	81396457	C	G	2	20	22	0.0909091	0.540514	0	0.736376	0.978125	0.85725	TRUE	CPHXL
58	rs113475910	chr22	50261654	C	T	12	2	14	0.857143	0.540514	0.333333	0.758325	0.976511	0.867418	TRUE	CPHXL
59	rs113522942	chr20	62142753	G	A	6	2	8	0.75	0.540514	1	0.00587372	0.175732	0.0908027	TRUE	CPHXL
60	rs113663555	chr19	45886068	C	T	12	12	24	0.5	0.540514	0.5	0.333753	0.691267	0.51251	FALSE	CPHXL
61	rs113708270	chr20	5001472	T	G	8	12	20	0.4	0.540514	0.333333	0.386855	0.759449	0.573152	FALSE	CPHXL
62	rs113742022	chr16	85028119	A	C	14	4	18	0.777778	0.540514	0.666667	0.410482	0.826058	0.61827	FALSE	CPHXL
63	rs113799953	chr14	100238553	T	G	26	2	28	0.928571	0.540514	1	0.0274882	0.356462	0.191975	TRUE	CPHXL
64	rs1145152	chr3	9187525	T	C	2	8	10	0.2	0.540514	0	0.856429	0.993479	0.924954	TRUE	CPHXL
65	rs114982608	chr1	941767	G	A	26	40	66	0.393939	0.540514	0.5	0.295779	0.52076	0.408269	FALSE	CPHXL
66	rs115266824	chr19	47608873	C	T	2	16	18	0.111111	0.540514	0	0.77565	0.984538	0.880094	TRUE	CPHXL
67	rs115379028	chr5	178131289	G	A	10	2	12	0.833333	0.540514	1	0.011207	0.21836	0.114784	TRUE	CPHXL
68	rs11538534	chr12	132687746	C	T	10	4	14	0.714286	0.540514	1	0.00566184	0.0779808	0.0418213	TRUE	CPHXL
69	rs11542411	chr2	130343161	G	A	2	8	10	0.2	0.540514	1	0.000765049	0.0109324	0.00584874	TRUE	CPHXL
70	rs11549412	chr1	150974780	C	G	18	2	20	0.9	0.540514	1	0.0165984	0.290481	0.153539	TRUE	CPHXL
71	rs11557085	chr8	144527516	C	T	2	4	6	0.333333	0.540514	0	0.902248	0.996544	0.949396	TRUE	CPHXL
72	rs115669754	chr2	85561615	C	A	18	18	36	0.5	0.540514	0.25	0.629441	0.858224	0.743833	TRUE	CPHXL
73	rs11576163	chr1	229342782	A	C	64	2	66	0.969697	0.540514	1	0.0780617	0.511884	0.294973	FALSE	CPHXL
74	rs11577707	chr1	15737065	G	A	6	6	12	0.5	0.540514	1	0.00360704	0.031386	0.0174965	TRUE	CPHXL
75	rs11588092	chr1	1069047	G	A	6	12	18	0.333333	0.540514	0.5	0.190262	0.574344	0.382303	FALSE	CPHXL
76	rs115892653	chr1	23168827	C	A	26	8	34	0.764706	0.540514	1	0.0154176	0.071709	0.0435633	TRUE	CPHXL
77	rs116000286	chr22	45979133	C	T	18	8	26	0.692308	0.540514	0.666667	0.351356	0.701197	0.526276	FALSE	CPHXL
78	rs11600261	chr11	121427411	A	C	8	2	10	0.8	0.540514	1	0.00603715	0.207978	0.107008	TRUE	CPHXL
79	rs11645448	chr16	50693164	A	G	8	4	12	0.666667	0.540514	1	0.00678393	0.0797429	0.0432634	TRUE	CPHXL
80	rs11655758	chr17	28710978	T	C	6	2	8	0.75	0.540514	0.5	0.429896	0.899619	0.664758	FALSE	CPHXL
81	rs116619767	chr9	111636991	G	T	14	2	16	0.875	0.540514	1	0.0175266	0.277733	0.14763	TRUE	CPHXL
82	rs11677667	chr2	237628177	C	T	12	4	16	0.75	0.540514	0	0.990875	0.998839	0.994857	TRUE	CPHXL
83	rs116853117	chr8	22574509	G	A	18	2	20	0.9	0.540514	1	0.0165984	0.290481	0.153539	TRUE	CPHXL
84	rs116986757	chr7	727345	C	A	6	6	12	0.5	0.540514	0.666667	0.167343	0.594426	0.380884	FALSE	CPHXL
85	rs117009988	chr19	18636238	G	A	20	4	24	0.833333	0.540514	0.6	0.541131	0.891755	0.716443	FALSE	CPHXL
86	rs117022703	chr11	10541133	G	A	12	10	22	0.545455	0.540514	0	0.980179	0.995454	0.987816	TRUE	CPHXL
87	rs11702478	chr21	45878601	G	A	6	2	8	0.75	0.540514	1	0.00587372	0.175732	0.0908027	TRUE	CPHXL
88	rs11706359	chr3	155870359	T	C	6	14	20	0.3	0.540514	1	0.00164232	0.0101283	0.00588533	TRUE	CPHXL
89	rs117164924	chr7	150448901	G	C	4	10	14	0.285714	0.540514	0.333333	0.245729	0.713496	0.479613	FALSE	CPHXL
90	rs117219709	chr13	49792088	G	A	16	4	20	0.8	0.540514	0.5	0.600813	0.916537	0.758675	TRUE	CPHXL
91	rs117659737	chr1	32500567	C	G	6	14	20	0.3	0.540514	1	0.00164232	0.0101283	0.00588533	TRUE	CPHXL
92	rs11766862	chr7	47328220	A	G	4	8	12	0.333333	0.540514	0	0.939048	0.99616	0.967604	TRUE	CPHXL
93	rs117990130	chr16	89720932	C	T	22	68	90	0.244444	0.540514	0	0.953305	0.9822	0.967753	TRUE	CPHXL
94	rs118007973	chr12	753114	G	A	18	2	20	0.9	0.540514	1	0.0165984	0.290481	0.153539	TRUE	CPHXL
95	rs11865749	chr16	667971	C	G	30	14	44	0.681818	0.540514	0.666667	0.371037	0.662532	0.516784	FALSE	CPHXL
96	rs11868888	chr17	19004876	A	G	8	6	14	0.571429	0.540514	0.333333	0.51875	0.887839	0.703295	FALSE	CPHXL
97	rs11879413	chr19	40832018	C	T	18	2	20	0.9	0.540514	1	0.0165984	0.290481	0.153539	TRUE	CPHXL
98	rs11881645	chr19	37056847	A	G	4	12	16	0.25	0.540514	1	0.00134613	0.0105032	0.00592465	TRUE	CPHXL
99	rs12048160	chr1	22564006	G	C	8	6	14	0.571429	0.540514	0.5	0.359468	0.789221	0.574344	FALSE	CPHXL
100	rs12113294	chr7	98281325	C	G	12	6	18	0.666667	0.540514	0.75	0.22426	0.638789	0.431525	FALSE	CPHXL
101	rs12151144	chr19	12801582	A	C	2	28	30	0.0666667	0.540514	0	0.700099	0.967378	0.833738	TRUE	CPHXL
102	rs12256036	chr10	17453446	C	A	8	2	10	0.8	0.540514	1	0.00603715	0.207978	0.107008	TRUE	CPHXL
103	rs1228814	chr6	77464103	G	T	6	8	14	0.428571	0.540514	0.25	0.488816	0.870436	0.679626	FALSE	CPHXL
104	rs12427430	chr13	110306600	G	T	14	4	18	0.777778	0.540514	1	0.0109059	0.105718	0.0583119	TRUE	CPHXL
105	rs12449272	chr16	28951434	G	A	10	18	28	0.357143	0.540514	0.6	0.160049	0.452095	0.306072	FALSE	CPHXL
106	rs12536382	chr7	127588674	C	T	22	8	30	0.733333	0.540514	0.833333	0.201361	0.544576	0.372969	FALSE	CPHXL
107	rs12617812	chr2	70132339	A	G	6	4	10	0.6	0.540514	1	0.00480328	0.0593122	0.0320578	TRUE	CPHXL
108	rs12618057	chr2	200306632	T	C	14	6	20	0.7	0.540514	1	0.0102168	0.0586194	0.0344181	TRUE	CPHXL
109	rs12626873	chr21	46294934	G	T	10	6	16	0.625	0.540514	1	0.00738973	0.0428173	0.0251035	TRUE	CPHXL
110	rs12715125	chr3	27721936	G	C	6	6	12	0.5	0.540514	1	0.00360704	0.031386	0.0174965	TRUE	CPHXL
111	rs12742403	chr1	242524418	G	C	14	4	18	0.777778	0.540514	0.75	0.285118	0.755156	0.520137	FALSE	CPHXL
112	rs12747275	chr1	92960984	G	A	8	12	20	0.4	0.540514	0	0.967639	0.993062	0.98035	TRUE	CPHXL
113	rs12754569	chr1	84997288	G	C	8	12	20	0.4	0.540514	0	0.967639	0.993062	0.98035	TRUE	CPHXL
114	rs12758212	chr1	201480634	A	G	8	10	18	0.444444	0.540514	0.666667	0.141473	0.488466	0.31497	FALSE	CPHXL
115	rs12804786	chr11	76381106	G	T	16	2	18	0.888889	0.540514	1	0.020956	0.301046	0.161001	TRUE	CPHXL
116	rs12883151	chr14	92323733	A	G	14	10	24	0.583333	0.540514	0	0.983583	0.996149	0.989866	TRUE	CPHXL
117	rs1291364	chr12	13000839	T	C	16	8	24	0.666667	0.540514	0	0.989567	0.99636	0.992964	TRUE	CPHXL
118	rs12920514	chr16	28824579	G	A	6	10	16	0.375	0.540514	0.5	0.225992	0.637198	0.431595	FALSE	CPHXL
119	rs12922662	chr16	9090872	C	G	6	4	10	0.6	0.540514	1	0.00480328	0.0593122	0.0320578	TRUE	CPHXL
120	rs12939116	chr17	38870542	G	C	12	8	20	0.6	0.540514	0.428571	0.472954	0.831219	0.652087	FALSE	CPHXL
121	rs12970964	chr18	12408231	C	T	6	14	20	0.3	0.540514	0	0.933154	0.989546	0.96135	TRUE	CPHXL
122	rs12981222	chr19	55642973	C	T	2	4	6	0.333333	0.540514	0.5	0.163661	0.7271	0.44538	FALSE	CPHXL
123	rs13027420	chr2	38396298	G	C	4	4	8	0.5	0.540514	0.666667	0.150607	0.629953	0.39028	FALSE	CPHXL
124	rs131988	chr22	45010161	G	C	6	30	36	0.166667	0.540514	0.666667	0.0485037	0.194323	0.121413	TRUE	CPHXL
125	rs1320057	chr4	8071234	C	A	2	2	4	0.5	0.540514	0	0.922037	0.99825	0.960144	TRUE	CPHXL
126	rs13299148	chr9	19184486	A	C	2	4	6	0.333333	0.540514	0	0.902248	0.996544	0.949396	TRUE	CPHXL
127	rs13337927	chr16	21084049	T	C	4	4	8	0.5	0.540514	0	0.955745	0.996425	0.976085	TRUE	CPHXL
128	rs13386862	chr2	44929185	G	A	6	2	8	0.75	0.540514	1	0.00587372	0.175732	0.0908027	TRUE	CPHXL
129	rs1353411	chr14	52314383	G	A	2	6	8	0.25	0.540514	1	0.0026838	0.0151048	0.00889429	TRUE	CPHXL
130	rs138218520	chr6	161592848	G	A	14	2	16	0.875	0.540514	1	0.0175266	0.277733	0.14763	TRUE	CPHXL
131	rs1383116	chr12	26125146	C	A	28	12	40	0.7	0.540514	0.666667	0.383726	0.684014	0.53387	FALSE	CPHXL
132	rs138792674	chr22	38317722	G	C	4	10	14	0.285714	0.540514	0.666667	0.0790632	0.396301	0.237682	TRUE	CPHXL
133	rs138808588	chr13	42040386	T	C	6	16	22	0.272727	0.540514	0	0.934395	0.990191	0.962293	TRUE	CPHXL
134	rs138842767	chr7	2632832	C	T	8	14	22	0.363636	0.540514	0	0.955105	0.991477	0.973291	TRUE	CPHXL
135	rs138889523	chr1	16164418	C	T	12	2	14	0.857143	0.540514	1	0.015139	0.239428	0.127284	TRUE	CPHXL
136	rs1388941	chr8	19757960	A	G	4	4	8	0.5	0.540514	0.666667	0.150607	0.629953	0.39028	FALSE	CPHXL
137	rs138931272	chr1	38005719	T	A	18	2	20	0.9	0.540514	1	0.0165984	0.290481	0.153539	TRUE	CPHXL
138	rs139799950	chr3	49133780	G	C	20	2	22	0.909091	0.540514	0	0.99737	0.999137	0.998254	TRUE	CPHXL
139	rs139962835	chr20	8132482	C	A	10	10	20	0.5	0.540514	0	0.974232	0.99485	0.984541	TRUE	CPHXL
140	rs140379134	chr3	151086829	A	G	12	2	14	0.857143	0.540514	1	0.015139	0.239428	0.127284	TRUE	CPHXL
141	rs140500978	chr22	43004370	C	T	2	14	16	0.125	0.540514	0.666667	0.0338737	0.247343	0.140608	TRUE	CPHXL
142	rs141427453	chr19	29715499	T	C	44	4	48	0.916667	0.540514	1	0.0465891	0.259443	0.153016	TRUE	CPHXL
143	rs141484893	chr20	43915039	T	G	4	10	14	0.285714	0.540514	0	0.916057	0.993865	0.954961	TRUE	CPHXL
144	rs142375387	chr3	179323269	G	C	6	10	16	0.375	0.540514	0	0.953944	0.994118	0.974031	TRUE	CPHXL
145	rs143711896	chr10	133187506	G	A	6	2	8	0.75	0.540514	1	0.00587372	0.175732	0.0908027	TRUE	CPHXL
146	rs1438386	chr15	67115561	G	A	8	10	18	0.444444	0.540514	0.333333	0.41491	0.80413	0.60952	FALSE	CPHXL
147	rs143874608	chr8	125430107	G	A	10	14	24	0.416667	0.540514	0	0.971683	0.993807	0.982745	TRUE	CPHXL
148	rs144443971	chr5	1524120	C	T	16	2	18	0.888889	0.540514	1	0.020956	0.301046	0.161001	TRUE	CPHXL
149	rs144693124	chr20	408274	G	C	8	24	32	0.25	0.540514	0.75	0.0541629	0.199845	0.127004	TRUE	CPHXL
150	rs145396941	chr7	129780514	C	A	24	10	34	0.705882	0.540514	0.5	0.545807	0.826056	0.685931	FALSE	CPHXL
151	rs146605240	chr20	50931128	C	T	22	12	34	0.647059	0.540514	1	0.00898724	0.0329051	0.0209462	TRUE	CPHXL
152	rs1474637	chr6	149237759	T	C	2	8	10	0.2	0.540514	0	0.856429	0.993479	0.924954	TRUE	CPHXL
153	rs148025174	chr16	4263815	G	A	18	2	20	0.9	0.540514	0	0.996831	0.999137	0.997984	TRUE	CPHXL
154	rs148382115	chr8	142739282	A	T	2	6	8	0.25	0.540514	1	0.0026838	0.0151048	0.00889429	TRUE	CPHXL
155	rs148383532	chr16	11797264	G	A	18	8	26	0.692308	0.540514	0.666667	0.351356	0.701197	0.526276	FALSE	CPHXL
156	rs1485345	chr12	30754806	T	G	12	22	34	0.352941	0.540514	0	0.963444	0.993085	0.978264	TRUE	CPHXL
157	rs149100456	chr19	40690434	G	A	24	2	26	0.923077	0.540514	0.909091	0.239895	0.739214	0.489555	FALSE	CPHXL
158	rs149259341	chr12	2795425	C	T	10	6	16	0.625	0.540514	1	0.00738973	0.0428173	0.0251035	TRUE	CPHXL
159	rs149698597	chr1	88992922	G	T	20	2	22	0.909091	0.540514	1	0.0277321	0.31788	0.172806	TRUE	CPHXL
160	rs150061390	chr19	7925270	G	C	6	8	14	0.428571	0.540514	0.75	0.0927832	0.421252	0.257018	FALSE	CPHXL
161	rs150316629	chr13	96090164	C	T	4	24	28	0.142857	0.540514	0	0.86622	0.979139	0.922679	TRUE	CPHXL
162	rs1511175	chr3	170358218	C	G	6	8	14	0.428571	0.540514	0	0.964115	0.997093	0.980604	TRUE	CPHXL
163	rs1547239	chr21	43718319	T	C	2	18	20	0.1	0.540514	0	0.753971	0.982992	0.868481	TRUE	CPHXL
164	rs15651	chr1	110338323	G	C	2	20	22	0.0909091	0.540514	0	0.736376	0.978125	0.85725	TRUE	CPHXL
165	rs165194	chr5	139709505	G	A	40	2	42	0.952381	0.540514	1	0.0466198	0.432335	0.239478	FALSE	CPHXL
166	rs1660345	chr8	100310534	C	A	2	12	14	0.142857	0.540514	0	0.818761	0.986615	0.902688	TRUE	CPHXL
167	rs1667605	chr2	74147757	G	A	6	4	10	0.6	0.540514	0	0.975453	0.997193	0.986323	TRUE	CPHXL
168	rs1674033	chr19	7596927	G	A	2	14	16	0.125	0.540514	0	0.79539	0.98598	0.890685	TRUE	CPHXL
169	rs1688123	chr19	3126334	A	G	2	14	16	0.125	0.540514	0	0.79539	0.98598	0.890685	TRUE	CPHXL
170	rs16884680	chr8	113432826	T	G	8	4	12	0.666667	0.540514	1	0.00678393	0.0797429	0.0432634	TRUE	CPHXL
171	rs16937698	chr8	71607320	C	T	4	6	10	0.4	0.540514	0	0.949155	0.995736	0.972445	TRUE	CPHXL
172	rs16992128	chr19	3933126	C	G	12	2	14	0.857143	0.540514	0	0.993757	0.998919	0.996338	TRUE	CPHXL
173	rs17345153	chr1	205210869	A	G	6	10	16	0.375	0.540514	0.25	0.426763	0.82209	0.624427	FALSE	CPHXL
174	rs17548596	chr17	35374471	T	C	6	2	8	0.75	0.540514	0	0.984601	0.999428	0.992015	TRUE	CPHXL
175	rs17554547	chr16	3457802	G	A	18	18	36	0.5	0.540514	1	0.00548876	0.018032	0.0117604	TRUE	CPHXL
176	rs17719836	chr7	157222944	A	G	8	4	12	0.666667	0.540514	0	0.986135	0.998588	0.992361	TRUE	CPHXL
177	rs1776178	chr1	241848232	A	G	10	40	50	0.2	0.540514	0.0833333	0.585761	0.843188	0.714475	FALSE	CPHXL
178	rs1780338	chr1	164636063	G	C	6	8	14	0.428571	0.540514	0	0.964115	0.997093	0.980604	TRUE	CPHXL
179	rs17882748	chr21	33403415	T	C	24	6	30	0.8	0.540514	1	0.0171276	0.091717	0.0544223	TRUE	CPHXL
180	rs17887160	chr12	6768555	C	T	6	4	10	0.6	0.540514	0.5	0.341533	0.821519	0.581526	FALSE	CPHXL
181	rs181215628	chr22	44331672	C	G	4	6	10	0.4	0.540514	1	0.00209329	0.0255817	0.0138375	TRUE	CPHXL
182	rs181355675	chr7	519896	T	C	4	2	6	0.666667	0.540514	1	0.00388858	0.136726	0.0703073	TRUE	CPHXL
183	rs182025879	chr1	8703291	C	A	4	8	12	0.333333	0.540514	0.5	0.171632	0.624008	0.39782	FALSE	CPHXL
184	rs183488561	chr7	158587744	G	T	4	4	8	0.5	0.540514	0.333333	0.391673	0.860932	0.626303	FALSE	CPHXL
185	rs183816339	chr4	143185089	G	T	12	2	14	0.857143	0.540514	1	0.015139	0.239428	0.127284	TRUE	CPHXL
186	rs184588010	chr12	111313943	G	T	14	6	20	0.7	0.540514	0.666667	0.341365	0.743798	0.542581	FALSE	CPHXL
187	rs185677744	chr15	82952948	C	A	8	12	20	0.4	0.540514	0.166667	0.590876	0.889036	0.739956	FALSE	CPHXL
188	rs186480464	chrX	120250811	T	C	20	6	26	0.769231	0.540514	1	0.015464	0.0794321	0.047448	TRUE	CPHXL
189	rs1870125	chr2	218323178	C	T	6	6	12	0.5	0.540514	1	0.00360704	0.031386	0.0174965	TRUE	CPHXL
190	rs1871925	chr1	83998785	C	G	12	6	18	0.666667	0.540514	0	0.987814	0.998463	0.993139	TRUE	CPHXL
191	rs187192810	chr16	4613382	A	G	6	2	8	0.75	0.540514	1	0.00587372	0.175732	0.0908027	TRUE	CPHXL
192	rs1872231	chr4	67700749	T	C	2	8	10	0.2	0.540514	0	0.856429	0.993479	0.924954	TRUE	CPHXL
193	rs1873209	chr3	87792916	T	C	8	4	12	0.666667	0.540514	0.666667	0.274896	0.754939	0.514917	FALSE	CPHXL
194	rs187368746	chrX	72307169	G	T	12	2	14	0.857143	0.540514	1	0.015139	0.239428	0.127284	TRUE	CPHXL
195	rs187660700	chr15	64460848	G	A	12	2	14	0.857143	0.540514	1	0.015139	0.239428	0.127284	TRUE	CPHXL
196	rs188132660	chr9	137454528	C	G	28	2	30	0.933333	0.540514	1	0.0247073	0.359147	0.191927	TRUE	CPHXL
197	rs1882551	chr12	6767122	G	C	14	2	16	0.875	0.540514	0.8	0.321874	0.826122	0.573998	FALSE	CPHXL
198	rs1883558	chr16	1276380	C	T	6	2	8	0.75	0.540514	0	0.984601	0.999428	0.992015	TRUE	CPHXL
199	rs1884010	chr14	28774515	A	G	12	10	22	0.545455	0.540514	0.6	0.283993	0.650915	0.467454	FALSE	CPHXL
200	rs189304970	chr20	43914708	A	C	2	4	6	0.333333	0.540514	0	0.902248	0.996544	0.949396	TRUE	CPHXL
201	rs189611932	chr15	101251653	G	A	8	2	10	0.8	0.540514	1	0.00603715	0.207978	0.107008	TRUE	CPHXL
202	rs190756141	chr1	9910178	C	A	16	2	18	0.888889	0.540514	1	0.020956	0.301046	0.161001	TRUE	CPHXL
203	rs1920128	chr3	184380405	A	C	8	6	14	0.571429	0.540514	1	0.00475067	0.0367745	0.0207626	TRUE	CPHXL
204	rs192789180	chr1	155563063	G	T	18	2	20	0.9	0.540514	1	0.0165984	0.290481	0.153539	TRUE	CPHXL
205	rs1947025	chr2	68251787	A	G	6	6	12	0.5	0.540514	1	0.00360704	0.031386	0.0174965	TRUE	CPHXL
206	rs1974745	chr17	20156511	C	G	10	6	16	0.625	0.540514	0.666667	0.250921	0.675863	0.463392	FALSE	CPHXL
207	rs201402793	chr2	144332184	A	G	14	2	16	0.875	0.540514	1	0.0175266	0.277733	0.14763	TRUE	CPHXL
208	rs2020919	chr8	42207691	A	G	12	16	28	0.428571	0.540514	0.25	0.540139	0.833494	0.686816	FALSE	CPHXL
209	rs2057367	chr14	54738373	G	A	4	6	10	0.4	0.540514	0	0.949155	0.995736	0.972445	TRUE	CPHXL
210	rs2064453	chr20	34873007	T	C	10	10	20	0.5	0.540514	0.8	0.112711	0.378291	0.245501	TRUE	CPHXL
211	rs2072596	chr19	12885686	A	G	10	4	14	0.714286	0.540514	0	0.988194	0.998843	0.993518	TRUE	CPHXL
212	rs2072726	chr20	44909956	G	T	2	10	12	0.166667	0.540514	0.333333	0.115588	0.614181	0.364885	FALSE	CPHXL
213	rs2081484	chr2	47426360	G	A	4	4	8	0.5	0.540514	1	0.00290702	0.0425797	0.0227433	TRUE	CPHXL
214	rs2115600	chr2	99781169	C	T	2	4	6	0.333333	0.540514	0	0.902248	0.996544	0.949396	TRUE	CPHXL
215	rs2196900	chr3	142889245	C	T	6	4	10	0.6	0.540514	0	0.975453	0.997193	0.986323	TRUE	CPHXL
216	rs2207610	chr6	152983590	T	C	20	2	22	0.909091	0.540514	1	0.0277321	0.31788	0.172806	TRUE	CPHXL
217	rs2231999	chr19	49119420	G	C	6	14	20	0.3	0.540514	0	0.933154	0.989546	0.96135	TRUE	CPHXL
218	rs2234580	chr11	32435592	A	G	14	10	24	0.583333	0.540514	0.666667	0.268438	0.623297	0.445867	FALSE	CPHXL
219	rs2242194	chr1	155017821	C	G	12	2	14	0.857143	0.540514	1	0.015139	0.239428	0.127284	TRUE	CPHXL
220	rs2274472	chr9	4985542	T	C	2	12	14	0.142857	0.540514	0	0.818761	0.986615	0.902688	TRUE	CPHXL
221	rs2278049	chr16	77212898	C	G	20	4	24	0.833333	0.540514	0.5	0.640553	0.925824	0.783189	TRUE	CPHXL
222	rs2281864	chr13	36346475	C	T	4	18	22	0.181818	0.540514	0.333333	0.179925	0.57975	0.379838	FALSE	CPHXL
223	rs2283568	chr17	4949010	G	A	4	12	16	0.25	0.540514	0.5	0.131058	0.520858	0.325958	FALSE	CPHXL
224	rs2285490	chrX	14873136	G	T	14	2	16	0.875	0.540514	1	0.0175266	0.277733	0.14763	TRUE	CPHXL
225	rs228749	chr17	44097202	A	G	20	8	28	0.714286	0.540514	0.8	0.237494	0.576425	0.406959	FALSE	CPHXL
226	rs2288381	chr12	108515207	G	A	16	2	18	0.888889	0.540514	0.666667	0.519649	0.935251	0.72745	FALSE	CPHXL
227	rs2288407	chr5	176537013	A	G	10	2	12	0.833333	0.540514	1	0.011207	0.21836	0.114784	TRUE	CPHXL
228	rs2295412	chr20	21303598	T	C	8	10	18	0.444444	0.540514	1	0.00321801	0.017647	0.0104325	TRUE	CPHXL
229	rs2297141	chr1	85581241	G	A	16	10	26	0.615385	0.540514	0.666667	0.276209	0.625076	0.450642	FALSE	CPHXL
230	rs2298841	chr8	104466471	A	G	2	6	8	0.25	0.540514	0	0.878638	0.995965	0.937302	TRUE	CPHXL
231	rs2303370	chr2	27428508	C	T	4	10	14	0.285714	0.540514	0.5	0.144958	0.558673	0.351815	FALSE	CPHXL
232	rs2303942	chr7	151078219	G	A	10	4	14	0.714286	0.540514	0	0.988194	0.998843	0.993518	TRUE	CPHXL
233	rs2306941	chr1	179229518	T	C	6	24	30	0.2	0.540514	0.571429	0.0902077	0.322853	0.20653	TRUE	CPHXL
234	rs2319459	chr22	49849285	C	T	8	6	14	0.571429	0.540514	0.5	0.359468	0.789221	0.574344	FALSE	CPHXL
235	rs236491	chr6	36715997	A	T	2	4	6	0.333333	0.540514	0	0.902248	0.996544	0.949396	TRUE	CPHXL
236	rs2390187	chr13	99086875	C	T	32	2	34	0.941176	0.540514	1	0.0362589	0.385362	0.21081	TRUE	CPHXL
237	rs2427397	chr20	62697326	G	T	6	12	18	0.333333	0.540514	0	0.942932	0.993884	0.968408	TRUE	CPHXL
238	rs2436865	chr8	102806542	G	T	8	12	20	0.4	0.540514	0.75	0.0964066	0.352003	0.224205	TRUE	CPHXL
239	rs2473808	chr1	19312389	T	C	38	2	40	0.95	0.540514	1	0.0419735	0.418289	0.230131	FALSE	CPHXL
240	rs2533003	chr17	58083481	T	C	8	8	16	0.5	0.540514	1	0.00424489	0.0248308	0.0145379	TRUE	CPHXL
241	rs2596912	chr3	9397062	C	T	6	18	24	0.25	0.540514	0.25	0.340205	0.729006	0.534605	FALSE	CPHXL
242	rs2693672	chr14	99274737	C	G	6	10	16	0.375	0.540514	0.5	0.225992	0.637198	0.431595	FALSE	CPHXL
243	rs2723158	chr2	112869774	G	C	4	12	16	0.25	0.540514	0.75	0.0429742	0.256601	0.149787	TRUE	CPHXL
244	rs2752894	chr20	36154424	A	T	2	12	14	0.142857	0.540514	0	0.818761	0.986615	0.902688	TRUE	CPHXL
245	rs2833743	chr21	32249246	T	C	2	8	10	0.2	0.540514	0	0.856429	0.993479	0.924954	TRUE	CPHXL
246	rs28360848	chr17	79832150	C	A	6	6	12	0.5	0.540514	1	0.00360704	0.031386	0.0174965	TRUE	CPHXL
247	rs2838755	chr21	45033583	C	T	6	4	10	0.6	0.540514	1	0.00480328	0.0593122	0.0320578	TRUE	CPHXL
248	rs28408686	chr17	32519606	C	G	6	10	16	0.375	0.540514	0	0.953944	0.994118	0.974031	TRUE	CPHXL
249	rs2843166	chr1	2289834	C	A	6	6	12	0.5	0.540514	0	0.970375	0.997125	0.98375	TRUE	CPHXL
250	rs28581471	chr8	35235264	G	T	4	2	6	0.666667	0.540514	0	0.96887	0.998153	0.983512	TRUE	CPHXL
251	rs28588601	chr6	43634964	A	C	24	2	26	0.923077	0.540514	1	0.027081	0.33543	0.181256	TRUE	CPHXL
252	rs28709500	chr8	98427044	T	C	4	4	8	0.5	0.540514	0.25	0.499037	0.916372	0.707705	FALSE	CPHXL
253	rs2885174	chr1	24694546	A	C	14	4	18	0.777778	0.540514	1	0.0109059	0.105718	0.0583119	TRUE	CPHXL
254	rs2959228	chr2	45009664	T	G	18	18	36	0.5	0.540514	0	0.981683	0.994396	0.98804	TRUE	CPHXL
255	rs2967510	chr19	36379481	C	G	24	8	32	0.75	0.540514	1	0.0137186	0.0617495	0.0377341	TRUE	CPHXL
256	rs2976265	chr8	26134325	C	T	20	2	22	0.909091	0.540514	0.5	0.730166	0.964692	0.847429	TRUE	CPHXL
257	rs2985686	chr14	49633965	C	G	2	18	20	0.1	0.540514	0	0.753971	0.982992	0.868481	TRUE	CPHXL
258	rs29939	chr19	33819895	A	G	28	2	30	0.933333	0.540514	0.666667	0.667969	0.959274	0.813622	TRUE	CPHXL
259	rs307719	chr19	3061770	A	G	10	2	12	0.833333	0.540514	0	0.992093	0.999445	0.995769	TRUE	CPHXL
260	rs3087357	chr2	200963642	C	G	12	8	20	0.6	0.540514	0.5	0.410621	0.783585	0.597103	FALSE	CPHXL
261	rs3171692	chr22	41246208	C	T	4	10	14	0.285714	0.540514	0	0.916057	0.993865	0.954961	TRUE	CPHXL
262	rs317815	chr18	57586478	G	A	2	16	18	0.111111	0.540514	0	0.77565	0.984538	0.880094	TRUE	CPHXL
263	rs3213563	chr1	172443855	T	C	8	14	22	0.363636	0.540514	0.75	0.0905984	0.31792	0.204259	TRUE	CPHXL
264	rs334405	chr18	7117301	C	T	8	2	10	0.8	0.540514	1	0.00603715	0.207978	0.107008	TRUE	CPHXL
265	rs34185514	chr17	81870372	G	A	10	4	14	0.714286	0.540514	0.333333	0.623244	0.932465	0.777854	TRUE	CPHXL
266	rs34197876	chr14	74257883	A	T	8	6	14	0.571429	0.540514	1	0.00475067	0.0367745	0.0207626	TRUE	CPHXL
267	rs34239095	chr15	88912537	C	G	6	4	10	0.6	0.540514	0.5	0.341533	0.821519	0.581526	FALSE	CPHXL
268	rs34506478	chr19	10527400	A	G	6	4	10	0.6	0.540514	1	0.00480328	0.0593122	0.0320578	TRUE	CPHXL
269	rs34787964	chr11	11660782	A	G	4	2	6	0.666667	0.540514	0	0.96887	0.998153	0.983512	TRUE	CPHXL
270	rs34887712	chr7	149625097	C	G	10	16	26	0.384615	0.540514	0	0.96607	0.992905	0.979488	TRUE	CPHXL
271	rs34927559	chr1	1019636	A	G	2	4	6	0.333333	0.540514	0	0.902248	0.996544	0.949396	TRUE	CPHXL
272	rs35034167	chr7	66115179	C	G	2	20	22	0.0909091	0.540514	0	0.736376	0.978125	0.85725	TRUE	CPHXL
273	rs35201266	chr8	22692184	C	T	4	16	20	0.2	0.540514	0.5	0.108191	0.433484	0.270838	FALSE	CPHXL
274	rs352575	chr5	77776011	G	A	2	34	36	0.0555556	0.540514	0	0.663533	0.965926	0.814729	TRUE	CPHXL
275	rs35501398	chr19	12801913	G	A	22	20	42	0.52381	0.540514	0.25	0.653501	0.857362	0.755431	TRUE	CPHXL
276	rs35520113	chr2	65432881	C	T	4	2	6	0.666667	0.540514	1	0.00388858	0.136726	0.0703073	TRUE	CPHXL
277	rs35592422	chr14	105530256	G	C	10	2	12	0.833333	0.540514	1	0.011207	0.21836	0.114784	TRUE	CPHXL
278	rs35687055	chr21	39313049	C	T	2	12	14	0.142857	0.540514	0.5	0.0624538	0.429052	0.245753	FALSE	CPHXL
279	rs35746260	chr7	151245748	C	T	4	8	12	0.333333	0.540514	0	0.939048	0.99616	0.967604	TRUE	CPHXL
280	rs35911837	chr19	344299	G	C	2	4	6	0.333333	0.540514	0	0.902248	0.996544	0.949396	TRUE	CPHXL
281	rs35991721	chr7	100131167	G	T	18	8	26	0.692308	0.540514	0.428571	0.579728	0.866815	0.723271	FALSE	CPHXL
282	rs36115739	chr4	183905228	A	T	4	16	20	0.2	0.540514	0	0.89077	0.986772	0.938771	TRUE	CPHXL
283	rs367756009	chr2	148644837	C	G	10	4	14	0.714286	0.540514	1	0.00566184	0.0779808	0.0418213	TRUE	CPHXL
284	rs367959021	chr4	140151690	C	G	18	2	20	0.9	0.540514	1	0.0165984	0.290481	0.153539	TRUE	CPHXL
285	rs370097200	chr2	85133196	G	A	18	2	20	0.9	0.540514	1	0.0165984	0.290481	0.153539	TRUE	CPHXL
286	rs370614055	chrX	140508278	G	T	14	2	16	0.875	0.540514	1	0.0175266	0.277733	0.14763	TRUE	CPHXL
287	rs370662621	chr12	53994823	G	T	18	2	20	0.9	0.540514	1	0.0165984	0.290481	0.153539	TRUE	CPHXL
288	rs372056274	chr4	826611	G	C	2	4	6	0.333333	0.540514	0	0.902248	0.996544	0.949396	TRUE	CPHXL
289	rs372800730	chr1	244653178	C	T	44	2	46	0.956522	0.540514	1	0.0466128	0.433989	0.240301	FALSE	CPHXL
290	rs373200654	chr20	25390747	G	C	4	2	6	0.666667	0.540514	0	0.96887	0.998153	0.983512	TRUE	CPHXL
291	rs3738520	chr1	235866598	C	T	2	18	20	0.1	0.540514	0.428571	0.0640676	0.388106	0.226087	TRUE	CPHXL
292	rs3742681	chr14	88554903	G	A	14	10	24	0.583333	0.540514	0	0.983583	0.996149	0.989866	TRUE	CPHXL
293	rs3743387	chr15	88913125	G	C	10	6	16	0.625	0.540514	0.666667	0.250921	0.675863	0.463392	FALSE	CPHXL
294	rs3743589	chr16	11742888	A	T	4	24	28	0.142857	0.540514	0.5	0.0843319	0.331082	0.207707	TRUE	CPHXL
295	rs3744652	chr17	8435965	C	T	28	22	50	0.56	0.540514	0.6	0.327137	0.591936	0.459537	FALSE	CPHXL
296	rs3745648	chr19	12832824	G	C	2	26	28	0.0714286	0.540514	1	0.000654816	0.00381653	0.00223568	TRUE	CPHXL
297	rs3745690	chr19	11355475	T	C	4	6	10	0.4	0.540514	0	0.949155	0.995736	0.972445	TRUE	CPHXL
298	rs3750076	chr7	32943234	G	A	14	14	28	0.5	0.540514	0.5	0.345128	0.672259	0.508694	FALSE	CPHXL
299	rs375214681	chr17	60391981	G	A	26	6	32	0.8125	0.540514	0.5	0.649771	0.912753	0.781262	TRUE	CPHXL
300	rs375259	chr4	48341533	C	T	16	2	18	0.888889	0.540514	1	0.020956	0.301046	0.161001	TRUE	CPHXL
301	rs3756087	chr4	99950774	A	G	2	20	22	0.0909091	0.540514	0	0.736376	0.978125	0.85725	TRUE	CPHXL
302	rs375922008	chr19	33623508	G	T	12	2	14	0.857143	0.540514	1	0.015139	0.239428	0.127284	TRUE	CPHXL
303	rs3759983	chr16	69107235	C	T	4	8	12	0.333333	0.540514	0	0.939048	0.99616	0.967604	TRUE	CPHXL
304	rs376091107	chr19	40279337	T	A	22	2	24	0.916667	0.540514	0.8	0.437416	0.888202	0.662809	FALSE	CPHXL
305	rs376450665	chr19	47468149	A	C	10	2	12	0.833333	0.540514	1	0.011207	0.21836	0.114784	TRUE	CPHXL
306	rs3765174	chr17	43546302	C	T	2	20	22	0.0909091	0.540514	0	0.736376	0.978125	0.85725	TRUE	CPHXL
307	rs376601356	chr3	170358394	A	T	6	2	8	0.75	0.540514	1	0.00587372	0.175732	0.0908027	TRUE	CPHXL
308	rs376909400	chr21	43279599	T	G	2	12	14	0.142857	0.540514	0	0.818761	0.986615	0.902688	TRUE	CPHXL
309	rs3794971	chr19	58474499	T	C	10	4	14	0.714286	0.540514	0	0.988194	0.998843	0.993518	TRUE	CPHXL
310	rs3795927	chr2	119224429	G	A	4	10	14	0.285714	0.540514	0	0.916057	0.993865	0.954961	TRUE	CPHXL
311	rs3809139	chr12	26126635	G	A	6	22	28	0.214286	0.540514	0.5	0.121602	0.407533	0.264567	FALSE	CPHXL
312	rs3809596	chr16	58515110	G	A	6	4	10	0.6	0.540514	0.5	0.341533	0.821519	0.581526	FALSE	CPHXL
313	rs3809646	chr16	89720447	C	T	6	12	18	0.333333	0.540514	0.75	0.074517	0.312908	0.193712	TRUE	CPHXL
314	rs3813904	chr16	70646841	G	C	4	6	10	0.4	0.540514	1	0.00209329	0.0255817	0.0138375	TRUE	CPHXL
315	rs3814027	chr2	111884277	C	T	14	2	16	0.875	0.540514	0.666667	0.485516	0.916482	0.700999	FALSE	CPHXL
316	rs3814477	chr7	1529782	C	T	4	6	10	0.4	0.540514	0	0.949155	0.995736	0.972445	TRUE	CPHXL
317	rs3826792	chr19	47273441	T	C	12	8	20	0.6	0.540514	0.8	0.140378	0.467302	0.30384	FALSE	CPHXL
318	rs3827256	chr21	44320940	A	G	2	10	12	0.166667	0.540514	0	0.837775	0.988724	0.91325	TRUE	CPHXL
319	rs3848549	chr19	49224739	G	A	8	2	10	0.8	0.540514	1	0.00603715	0.207978	0.107008	TRUE	CPHXL
320	rs3905118	chr1	183472842	C	T	4	20	24	0.166667	0.540514	0.5	0.0890964	0.372949	0.231023	TRUE	CPHXL
321	rs393025	chr1	166975691	C	A	14	2	16	0.875	0.540514	1	0.0175266	0.277733	0.14763	TRUE	CPHXL
322	rs3935068	chr11	57311247	C	T	4	4	8	0.5	0.540514	0.333333	0.391673	0.860932	0.626303	FALSE	CPHXL
323	rs403694	chr21	45147710	C	T	2	12	14	0.142857	0.540514	0	0.818761	0.986615	0.902688	TRUE	CPHXL
324	rs409170	chr16	89615942	A	G	8	6	14	0.571429	0.540514	0.5	0.359468	0.789221	0.574344	FALSE	CPHXL
325	rs41428545	chr19	33303120	C	T	2	22	24	0.0833333	0.540514	0.428571	0.0496985	0.341291	0.195495	TRUE	CPHXL
326	rs4147940	chr19	1066739	C	T	8	8	16	0.5	0.540514	0	0.973568	0.995252	0.98441	TRUE	CPHXL
327	rs426594	chr21	45913632	T	C	2	6	8	0.25	0.540514	0	0.878638	0.995965	0.937302	TRUE	CPHXL
328	rs4292	chr17	63476980	C	T	12	4	16	0.75	0.540514	0.75	0.251238	0.708074	0.479656	FALSE	CPHXL
329	rs4431000	chr20	64084195	C	A	4	10	14	0.285714	0.540514	0.333333	0.245729	0.713496	0.479613	FALSE	CPHXL
330	rs4469422	chr8	93916851	T	A	8	6	14	0.571429	0.540514	0	0.977488	0.995879	0.986683	TRUE	CPHXL
331	rs4655064	chr1	22451963	C	A	8	8	16	0.5	0.540514	0.5	0.309195	0.720027	0.514611	FALSE	CPHXL
332	rs469189	chr22	29553520	G	A	2	16	18	0.111111	0.540514	0	0.77565	0.984538	0.880094	TRUE	CPHXL
333	rs4702687	chr5	10297779	A	G	4	12	16	0.25	0.540514	0	0.917121	0.9928	0.954961	TRUE	CPHXL
334	rs4766460	chr12	111397205	A	G	4	26	30	0.133333	0.540514	0.142857	0.305288	0.72108	0.513184	FALSE	CPHXL
335	rs4782891	chr16	84080644	C	T	2	10	12	0.166667	0.540514	0.5	0.0734582	0.462949	0.268204	FALSE	CPHXL
336	rs4789770	chr17	82418779	C	T	12	6	18	0.666667	0.540514	0.75	0.22426	0.638789	0.431525	FALSE	CPHXL
337	rs4800495	chr18	23585445	T	C	6	10	16	0.375	0.540514	0	0.953944	0.994118	0.974031	TRUE	CPHXL
338	rs4809331	chr20	63739537	A	G	2	14	16	0.125	0.540514	0	0.79539	0.98598	0.890685	TRUE	CPHXL
339	rs4810690	chr20	47786524	G	A	10	4	14	0.714286	0.540514	0.5	0.45974	0.865386	0.662563	FALSE	CPHXL
340	rs4819356	chr21	43981342	C	T	6	4	10	0.6	0.540514	1	0.00480328	0.0593122	0.0320578	TRUE	CPHXL
341	rs4820044	chr22	31291327	A	G	6	16	22	0.272727	0.540514	0.666667	0.0861351	0.32458	0.205358	TRUE	CPHXL
342	rs4900534	chr14	102205656	C	T	10	2	12	0.833333	0.540514	1	0.011207	0.21836	0.114784	TRUE	CPHXL
343	rs4911358	chr20	33674407	G	C	14	6	20	0.7	0.540514	1	0.0102168	0.0586194	0.0344181	TRUE	CPHXL
344	rs4927019	chr1	53619375	C	T	10	2	12	0.833333	0.540514	0.666667	0.417743	0.891225	0.654484	FALSE	CPHXL
345	rs4968207	chr17	7717589	C	G	8	14	22	0.363636	0.540514	0.8	0.0566559	0.247351	0.152004	TRUE	CPHXL
346	rs4968747	chr17	62965927	G	T	10	6	16	0.625	0.540514	0.25	0.677085	0.942477	0.809781	TRUE	CPHXL
347	rs4989100	chr1	202144707	T	G	14	8	22	0.636364	0.540514	0.5	0.441433	0.807024	0.624229	FALSE	CPHXL
348	rs55741503	chr20	25247508	C	A	8	14	22	0.363636	0.540514	0.25	0.431626	0.79502	0.613323	FALSE	CPHXL
349	rs55859302	chr15	74222738	T	C	8	4	12	0.666667	0.540514	0.666667	0.274896	0.754939	0.514917	FALSE	CPHXL
350	rs55997320	chr8	53066942	C	A	6	2	8	0.75	0.540514	1	0.00587372	0.175732	0.0908027	TRUE	CPHXL
351	rs56123568	chr17	5031730	G	C	6	8	14	0.428571	0.540514	1	0.0042748	0.0222532	0.013264	TRUE	CPHXL
352	rs56158152	chr16	84700541	G	T	2	10	12	0.166667	0.540514	0.333333	0.115588	0.614181	0.364885	FALSE	CPHXL
353	rs56166765	chr14	55271300	T	C	12	14	26	0.461538	0.540514	1	0.00490111	0.0167519	0.0108265	TRUE	CPHXL
354	rs56294817	chr2	238240329	C	A	8	10	18	0.444444	0.540514	0.5	0.259417	0.663322	0.461369	FALSE	CPHXL
355	rs56303180	chr14	99253536	A	G	16	16	32	0.5	0.540514	0.25	0.603585	0.849045	0.726315	TRUE	CPHXL
356	rs56324376	chr12	118372134	T	C	2	8	10	0.2	0.540514	0.333333	0.1787	0.685832	0.432266	FALSE	CPHXL
357	rs56969689	chr8	30095740	C	T	12	6	18	0.666667	0.540514	1	0.00904919	0.0525637	0.0308065	TRUE	CPHXL
358	rs57509765	chr18	6730017	G	C	14	2	16	0.875	0.540514	1	0.0175266	0.277733	0.14763	TRUE	CPHXL
359	rs5753116	chr22	30387536	C	G	8	14	22	0.363636	0.540514	0	0.955105	0.991477	0.973291	TRUE	CPHXL
360	rs57591949	chr19	39126045	C	T	12	52	64	0.1875	0.540514	0	0.923933	0.977216	0.950575	TRUE	CPHXL
361	rs57808993	chr14	21526398	A	G	10	2	12	0.833333	0.540514	1	0.011207	0.21836	0.114784	TRUE	CPHXL
362	rs57911398	chr12	26833589	A	G	10	8	18	0.555556	0.540514	0.5	0.337397	0.736704	0.537051	FALSE	CPHXL
363	rs58027486	chr17	7238293	C	A	14	2	16	0.875	0.540514	1	0.0175266	0.277733	0.14763	TRUE	CPHXL
364	rs58424886	chr14	73714538	G	A	10	8	18	0.555556	0.540514	0.666667	0.213898	0.608585	0.411242	FALSE	CPHXL
365	rs58726213	chr16	31033362	A	G	2	20	22	0.0909091	0.540514	0.4	0.0538863	0.373907	0.213897	TRUE	CPHXL
366	rs59204964	chr17	58083344	G	A	8	8	16	0.5	0.540514	0.5	0.309195	0.720027	0.514611	FALSE	CPHXL
367	rs59249820	chr3	170037757	C	T	8	8	16	0.5	0.540514	0.333333	0.466881	0.844503	0.655692	FALSE	CPHXL
368	rs5955388	chrX	140106519	A	C	2	4	6	0.333333	0.540514	1	0.00130595	0.0284479	0.0148769	TRUE	CPHXL
369	rs6010716	chr20	64079697	C	A	4	22	26	0.153846	0.540514	0	0.873012	0.97761	0.925311	TRUE	CPHXL
370	rs6011489	chr20	62937465	C	T	8	18	26	0.307692	0.540514	0	0.94833	0.987127	0.967729	TRUE	CPHXL
371	rs60542959	chr12	56267121	G	T	26	12	38	0.684211	0.540514	0.5	0.534372	0.805324	0.669848	FALSE	CPHXL
372	rs6058017	chr20	34269192	A	G	4	2	6	0.666667	0.540514	0	0.96887	0.998153	0.983512	TRUE	CPHXL
373	rs6062263	chr20	62557870	A	T	4	4	8	0.5	0.540514	0	0.955745	0.996425	0.976085	TRUE	CPHXL
374	rs6062498	chr20	63707707	C	G	8	10	18	0.444444	0.540514	1	0.00321801	0.017647	0.0104325	TRUE	CPHXL
375	rs6087939	chr20	32584177	G	T	32	2	34	0.941176	0.540514	1	0.0362589	0.385362	0.21081	TRUE	CPHXL
376	rs6116153	chr20	4015561	C	T	8	4	12	0.666667	0.540514	0	0.986135	0.998588	0.992361	TRUE	CPHXL
377	rs6122889	chr20	50216686	T	A	12	2	14	0.857143	0.540514	1	0.015139	0.239428	0.127284	TRUE	CPHXL
378	rs61731322	chr7	101180348	C	G	2	8	10	0.2	0.540514	0	0.856429	0.993479	0.924954	TRUE	CPHXL
379	rs61773957	chr1	24643647	C	G	16	14	30	0.533333	0.540514	0.666667	0.23776	0.548714	0.393237	FALSE	CPHXL
380	rs61774764	chr1	41496483	C	G	32	10	42	0.761905	0.540514	0.75	0.342687	0.675896	0.509292	FALSE	CPHXL
381	rs61891388	chr11	66312347	T	G	2	18	20	0.1	0.540514	0	0.753971	0.982992	0.868481	TRUE	CPHXL
382	rs61926301	chr12	50764080	G	T	8	6	14	0.571429	0.540514	0.5	0.359468	0.789221	0.574344	FALSE	CPHXL
383	rs61955196	chr12	122966471	G	C	12	10	22	0.545455	0.540514	0.666667	0.222012	0.569979	0.395995	FALSE	CPHXL
384	rs61993005	chr14	100567853	G	A	2	2	4	0.5	0.540514	1	0.00280527	0.0920524	0.0474288	TRUE	CPHXL
385	rs61994063	chr14	92687067	G	A	14	18	32	0.4375	0.540514	0	0.976575	0.993794	0.985184	TRUE	CPHXL
386	rs62046613	chr16	77594883	C	T	2	8	10	0.2	0.540514	0.666667	0.0348231	0.366038	0.20043	TRUE	CPHXL
387	rs62049031	chr16	70438810	C	T	16	14	30	0.533333	0.540514	0	0.981999	0.994082	0.98804	TRUE	CPHXL
388	rs62056476	chr16	87550597	A	G	16	6	22	0.727273	0.540514	0.5	0.524288	0.862642	0.693465	FALSE	CPHXL
389	rs62096871	chr18	79400601	C	A	2	14	16	0.125	0.540514	0	0.79539	0.98598	0.890685	TRUE	CPHXL
390	rs62106609	chr19	6280056	C	T	18	2	20	0.9	0.540514	1	0.0165984	0.290481	0.153539	TRUE	CPHXL
391	rs62127764	chr19	55341345	C	G	10	6	16	0.625	0.540514	0.75	0.173208	0.588668	0.380938	FALSE	CPHXL
392	rs62128749	chr19	10230877	A	C	20	2	22	0.909091	0.540514	1	0.0277321	0.31788	0.172806	TRUE	CPHXL
393	rs62134788	chr19	46714330	C	T	4	8	12	0.333333	0.540514	0.333333	0.27387	0.739294	0.506582	FALSE	CPHXL
394	rs62214417	chr21	45321372	C	T	10	2	12	0.833333	0.540514	1	0.011207	0.21836	0.114784	TRUE	CPHXL
395	rs62237785	chr22	17121274	C	G	4	14	18	0.222222	0.540514	0.666667	0.0665414	0.31974	0.193141	TRUE	CPHXL
396	rs62465135	chr7	73433669	G	C	26	10	36	0.722222	0.540514	0.666667	0.405806	0.721354	0.56358	FALSE	CPHXL
397	rs62466263	chr7	73522573	G	A	8	8	16	0.5	0.540514	1	0.00424489	0.0248308	0.0145379	TRUE	CPHXL
398	rs637929	chr1	201721350	T	A	22	6	28	0.785714	0.540514	1	0.0196504	0.0861191	0.0528848	TRUE	CPHXL
399	rs6465798	chr7	101364179	G	C	4	10	14	0.285714	0.540514	0	0.916057	0.993865	0.954961	TRUE	CPHXL
400	rs650101	chr20	49779929	G	C	8	2	10	0.8	0.540514	1	0.00603715	0.207978	0.107008	TRUE	CPHXL
401	rs6502385	chr17	2594755	A	G	4	12	16	0.25	0.540514	0	0.917121	0.9928	0.954961	TRUE	CPHXL
402	rs655530	chr12	120584472	T	C	16	2	18	0.888889	0.540514	0.5	0.695988	0.973046	0.834517	TRUE	CPHXL
403	rs66460850	chr11	93758767	A	C	2	2	4	0.5	0.540514	1	0.00280527	0.0920524	0.0474288	TRUE	CPHXL
404	rs66956754	chr14	105181663	C	T	12	6	18	0.666667	0.540514	0.5	0.453097	0.831294	0.642196	FALSE	CPHXL
405	rs6752638	chr2	191020691	G	A	8	12	20	0.4	0.540514	1	0.00369952	0.0158991	0.00979933	TRUE	CPHXL
406	rs67545510	chr1	46340570	G	T	16	2	18	0.888889	0.540514	1	0.020956	0.301046	0.161001	TRUE	CPHXL
407	rs675740	chr12	29783867	G	A	12	12	24	0.5	0.540514	1	0.00628792	0.0196373	0.0129626	TRUE	CPHXL
408	rs6768359	chr3	27484217	C	T	2	4	6	0.333333	0.540514	1	0.00130595	0.0284479	0.0148769	TRUE	CPHXL
409	rs67775867	chr17	79215021	C	G	4	8	12	0.333333	0.540514	0	0.939048	0.99616	0.967604	TRUE	CPHXL
410	rs6835517	chr4	173168484	A	C	12	2	14	0.857143	0.540514	1	0.015139	0.239428	0.127284	TRUE	CPHXL
411	rs6956825	chr7	127392753	C	G	22	4	26	0.846154	0.540514	0.333333	0.799919	0.964243	0.882081	TRUE	CPHXL
412	rs6960603	chr7	141072599	G	A	12	4	16	0.75	0.540514	1	0.0118979	0.0908331	0.0513655	TRUE	CPHXL
413	rs6968563	chr7	128937677	T	C	6	4	10	0.6	0.540514	1	0.00480328	0.0593122	0.0320578	TRUE	CPHXL
414	rs6975847	chr7	16753879	A	G	4	14	18	0.222222	0.540514	0.666667	0.0665414	0.31974	0.193141	TRUE	CPHXL
415	rs701841	chr10	101286058	G	C	10	2	12	0.833333	0.540514	1	0.011207	0.21836	0.114784	TRUE	CPHXL
416	rs7046853	chr9	129885806	T	C	22	2	24	0.916667	0.540514	1	0.0263597	0.322276	0.174318	TRUE	CPHXL
417	rs710623	chr12	67270198	T	G	6	22	28	0.214286	0.540514	0.333333	0.217003	0.573441	0.395222	FALSE	CPHXL
418	rs7108534	chr11	44857284	G	A	4	4	8	0.5	0.540514	0	0.955745	0.996425	0.976085	TRUE	CPHXL
419	rs7123861	chr11	8870776	G	A	4	16	20	0.2	0.540514	0.666667	0.0492029	0.272083	0.160643	TRUE	CPHXL
420	rs7127647	chr11	71251295	C	T	14	4	18	0.777778	0.540514	0.333333	0.710711	0.94476	0.827736	TRUE	CPHXL
421	rs7141565	chr14	59576854	G	C	20	2	22	0.909091	0.540514	1	0.0277321	0.31788	0.172806	TRUE	CPHXL
422	rs71419296	chr14	96797592	T	C	14	10	24	0.583333	0.540514	0.4	0.506961	0.826058	0.666509	FALSE	CPHXL
423	rs71421262	chr14	102777071	A	G	6	6	12	0.5	0.540514	1	0.00360704	0.031386	0.0174965	TRUE	CPHXL
424	rs714780	chr21	38806593	G	T	2	12	14	0.142857	0.540514	0	0.818761	0.986615	0.902688	TRUE	CPHXL
425	rs71511461	chr1	57422718	G	T	6	8	14	0.428571	0.540514	0	0.964115	0.997093	0.980604	TRUE	CPHXL
426	rs7152548	chr14	60655322	A	G	2	6	8	0.25	0.540514	0	0.878638	0.995965	0.937302	TRUE	CPHXL
427	rs71585239	chr5	344215	A	G	20	2	22	0.909091	0.540514	1	0.0277321	0.31788	0.172806	TRUE	CPHXL
428	rs71644062	chr1	17654035	C	T	6	6	12	0.5	0.540514	0.5	0.295374	0.750932	0.523153	FALSE	CPHXL
429	rs7175303	chr15	101251400	G	A	2	14	16	0.125	0.540514	1	0.00107286	0.00690482	0.00398884	TRUE	CPHXL
430	rs717863	chr1	16237140	A	G	22	16	38	0.578947	0.540514	0.166667	0.788413	0.929451	0.858932	TRUE	CPHXL
431	rs7212757	chr17	50950495	C	T	20	10	30	0.666667	0.540514	0.833333	0.165337	0.455464	0.3104	FALSE	CPHXL
432	rs7212854	chr17	44177049	A	G	6	4	10	0.6	0.540514	0	0.975453	0.997193	0.986323	TRUE	CPHXL
433	rs7254755	chr19	17605773	A	G	4	6	10	0.4	0.540514	0	0.949155	0.995736	0.972445	TRUE	CPHXL
434	rs7257265	chr19	7888492	C	T	16	2	18	0.888889	0.540514	0.5	0.695988	0.973046	0.834517	TRUE	CPHXL
435	rs7257932	chr19	18416447	G	A	14	2	16	0.875	0.540514	1	0.0175266	0.277733	0.14763	TRUE	CPHXL
436	rs7258433	chr19	10543787	A	G	4	14	18	0.222222	0.540514	0	0.906461	0.991527	0.948994	TRUE	CPHXL
437	rs7262274	chr20	34825373	G	C	4	14	18	0.222222	0.540514	0	0.906461	0.991527	0.948994	TRUE	CPHXL
438	rs72654052	chr1	32886832	G	T	6	6	12	0.5	0.540514	0.5	0.295374	0.750932	0.523153	FALSE	CPHXL
439	rs7273313	chr20	25696551	G	A	18	2	20	0.9	0.540514	1	0.0165984	0.290481	0.153539	TRUE	CPHXL
440	rs7276578	chr21	43922471	C	G	6	10	16	0.375	0.540514	0	0.953944	0.994118	0.974031	TRUE	CPHXL
441	rs72813185	chr5	177312109	C	A	22	2	24	0.916667	0.540514	1	0.0263597	0.322276	0.174318	TRUE	CPHXL
442	rs7281361	chr21	34890130	A	G	38	2	40	0.95	0.540514	1	0.0419735	0.418289	0.230131	FALSE	CPHXL
443	rs72858243	chr11	8733012	A	G	8	4	12	0.666667	0.540514	0	0.986135	0.998588	0.992361	TRUE	CPHXL
444	rs73014347	chr11	124839956	G	A	8	6	14	0.571429	0.540514	0	0.977488	0.995879	0.986683	TRUE	CPHXL
445	rs73039245	chr7	2157810	T	C	10	8	18	0.555556	0.540514	0	0.980037	0.99627	0.988153	TRUE	CPHXL
446	rs73090789	chr12	32897240	G	A	12	4	16	0.75	0.540514	1	0.0118979	0.0908331	0.0513655	TRUE	CPHXL
447	rs7310175	chr12	120194926	C	T	18	10	28	0.642857	0.540514	0.8	0.181496	0.481909	0.331703	FALSE	CPHXL
448	rs73102769	chr2	232928501	T	C	12	8	20	0.6	0.540514	1	0.00630238	0.0359705	0.0211364	TRUE	CPHXL
449	rs7314742	chr12	121774846	G	T	8	10	18	0.444444	0.540514	0	0.969479	0.995333	0.982406	TRUE	CPHXL
450	rs73171811	chr22	36583733	C	G	4	4	8	0.5	0.540514	0.5	0.246485	0.759607	0.503046	FALSE	CPHXL
451	rs73437382	chr12	89709168	C	G	10	22	32	0.3125	0.540514	0.2	0.490593	0.79211	0.641352	FALSE	CPHXL
452	rs73437682	chr17	80037147	C	T	20	4	24	0.833333	0.540514	1	0.0183694	0.128251	0.07331	TRUE	CPHXL
453	rs73581711	chr19	48646791	G	T	20	8	28	0.714286	0.540514	0.5	0.534616	0.844506	0.689561	FALSE	CPHXL
454	rs736167	chr12	50283317	C	A	10	6	16	0.625	0.540514	1	0.00738973	0.0428173	0.0251035	TRUE	CPHXL
455	rs73691586	chr8	66775089	T	C	4	10	14	0.285714	0.540514	0.666667	0.0790632	0.396301	0.237682	TRUE	CPHXL
456	rs737260	chr16	3717472	G	A	8	20	28	0.285714	0.540514	0.333333	0.292347	0.65052	0.471434	FALSE	CPHXL
457	rs738248	chr22	41800463	A	G	4	18	22	0.181818	0.540514	0.5	0.0821181	0.385148	0.233633	TRUE	CPHXL
458	rs739789	chr11	61917497	G	A	8	10	18	0.444444	0.540514	0	0.969479	0.995333	0.982406	TRUE	CPHXL
459	rs74625883	chr2	65436247	G	A	8	4	12	0.666667	0.540514	0	0.986135	0.998588	0.992361	TRUE	CPHXL
460	rs750578	chr19	50667931	G	A	2	8	10	0.2	0.540514	0.5	0.087465	0.516211	0.301838	FALSE	CPHXL
461	rs7519071	chr1	57423555	T	A	4	10	14	0.285714	0.540514	0.166667	0.438646	0.859757	0.649202	FALSE	CPHXL
462	rs7530108	chr1	15153790	G	C	18	2	20	0.9	0.540514	1	0.0165984	0.290481	0.153539	TRUE	CPHXL
463	rs75342462	chr3	61561490	C	T	4	6	10	0.4	0.540514	1	0.00209329	0.0255817	0.0138375	TRUE	CPHXL
464	rs7567240	chr2	196593642	G	A	16	2	18	0.888889	0.540514	0.25	0.859273	0.986377	0.922825	TRUE	CPHXL
465	rs7576126	chr2	65431235	G	A	14	2	16	0.875	0.540514	1	0.0175266	0.277733	0.14763	TRUE	CPHXL
466	rs7579808	chr2	37672705	C	G	6	6	12	0.5	0.540514	1	0.00360704	0.031386	0.0174965	TRUE	CPHXL
467	rs7579996	chr2	109614115	C	A	10	20	30	0.333333	0.540514	0.444444	0.265726	0.583503	0.424615	FALSE	CPHXL
468	rs7583584	chr2	219254636	A	C	2	8	10	0.2	0.540514	0	0.856429	0.993479	0.924954	TRUE	CPHXL
469	rs758374	chr22	19984029	T	C	14	4	18	0.777778	0.540514	0	0.992593	0.999208	0.995901	TRUE	CPHXL
470	rs75851226	chr1	169894024	A	C	18	8	26	0.692308	0.540514	0.75	0.267481	0.629853	0.448667	FALSE	CPHXL
471	rs7592689	chr2	113756521	A	C	6	8	14	0.428571	0.540514	0.75	0.0927832	0.421252	0.257018	FALSE	CPHXL
472	rs75987362	chr17	4833543	G	A	22	2	24	0.916667	0.540514	1	0.0263597	0.322276	0.174318	TRUE	CPHXL
473	rs76096449	chr19	1236709	C	A	12	4	16	0.75	0.540514	0.4	0.614057	0.930707	0.772382	TRUE	CPHXL
474	rs76458579	chr8	60923272	C	G	10	4	14	0.714286	0.540514	0	0.988194	0.998843	0.993518	TRUE	CPHXL
475	rs76734856	chr1	233905283	C	A	16	10	26	0.615385	0.540514	1	0.00812594	0.0323738	0.0202499	TRUE	CPHXL
476	rs76842574	chr12	118371789	G	A	4	14	18	0.222222	0.540514	0	0.906461	0.991527	0.948994	TRUE	CPHXL
477	rs76969016	chr19	2475949	T	G	18	2	20	0.9	0.540514	1	0.0165984	0.290481	0.153539	TRUE	CPHXL
478	rs77584890	chr1	161098329	C	T	26	4	30	0.866667	0.540514	1	0.0181263	0.166231	0.0921787	TRUE	CPHXL
479	rs77607658	chr3	182793299	G	C	20	6	26	0.769231	0.540514	0.666667	0.428752	0.798954	0.613853	FALSE	CPHXL
480	rs7781141	chr7	4883930	C	A	4	12	16	0.25	0.540514	0.4	0.16392	0.583578	0.373749	FALSE	CPHXL
481	rs7792955	chr7	151426680	C	A	20	2	22	0.909091	0.540514	1	0.0277321	0.31788	0.172806	TRUE	CPHXL
482	rs78055223	chr2	240233358	C	A	10	6	16	0.625	0.540514	0.75	0.173208	0.588668	0.380938	FALSE	CPHXL
483	rs7807641	chr7	100158880	C	G	14	12	26	0.538462	0.540514	0.6	0.26834	0.612359	0.440349	FALSE	CPHXL
484	rs781655	chr4	56908285	C	G	2	14	16	0.125	0.540514	0	0.79539	0.98598	0.890685	TRUE	CPHXL
485	rs78363886	chr14	99967187	C	G	10	2	12	0.833333	0.540514	1	0.011207	0.21836	0.114784	TRUE	CPHXL
486	rs7837157	chr8	28494540	A	G	8	14	22	0.363636	0.540514	0.333333	0.363363	0.731582	0.547472	FALSE	CPHXL
487	rs78741986	chr7	25951612	T	C	18	4	22	0.818182	0.540514	1	0.0181132	0.120534	0.0693235	TRUE	CPHXL
488	rs78777741	chr19	1757834	C	T	10	2	12	0.833333	0.540514	1	0.011207	0.21836	0.114784	TRUE	CPHXL
489	rs78891815	chr11	114818565	G	A	2	6	8	0.25	0.540514	0	0.878638	0.995965	0.937302	TRUE	CPHXL
490	rs7894006	chr10	8056222	A	G	22	2	24	0.916667	0.540514	1	0.0263597	0.322276	0.174318	TRUE	CPHXL
491	rs78985989	chr1	202710011	C	G	10	10	20	0.5	0.540514	0.333333	0.469721	0.819401	0.644561	FALSE	CPHXL
492	rs79012926	chr20	36093456	C	G	10	4	14	0.714286	0.540514	1	0.00566184	0.0779808	0.0418213	TRUE	CPHXL
493	rs79034568	chr13	67230450	C	G	28	2	30	0.933333	0.540514	1	0.0247073	0.359147	0.191927	TRUE	CPHXL
494	rs7927458	chr11	75525975	T	A	18	12	30	0.6	0.540514	0.5	0.44048	0.760115	0.600298	FALSE	CPHXL
495	rs79350715	chr2	241036377	C	G	10	4	14	0.714286	0.540514	0	0.988194	0.998843	0.993518	TRUE	CPHXL
496	rs79378930	chr16	1379382	C	A	18	4	22	0.818182	0.540514	0	0.994399	0.999237	0.996818	TRUE	CPHXL
497	rs79412573	chr15	90185262	T	C	12	20	32	0.375	0.540514	0	0.963041	0.990466	0.976753	TRUE	CPHXL
498	rs7952113	chr11	120511700	T	C	2	12	14	0.142857	0.540514	0	0.818761	0.986615	0.902688	TRUE	CPHXL
499	rs79536844	chr3	50337635	C	T	8	8	16	0.5	0.540514	0.5	0.309195	0.720027	0.514611	FALSE	CPHXL
500	rs7958704	chr12	51590565	T	C	12	4	16	0.75	0.540514	0	0.990875	0.998839	0.994857	TRUE	CPHXL
501	rs79652007	chr17	75110027	A	C	22	2	24	0.916667	0.540514	1	0.0263597	0.322276	0.174318	TRUE	CPHXL
502	rs79878523	chr12	125249675	G	A	6	8	14	0.428571	0.540514	1	0.0042748	0.0222532	0.013264	TRUE	CPHXL
503	rs8006176	chr14	100566951	A	G	8	2	10	0.8	0.540514	0.666667	0.352051	0.848169	0.60011	FALSE	CPHXL
504	rs80099324	chr9	94166778	G	A	2	16	18	0.111111	0.540514	0	0.77565	0.984538	0.880094	TRUE	CPHXL
505	rs8017780	chr14	103520968	C	A	6	2	8	0.75	0.540514	0.8	0.173485	0.721497	0.447491	FALSE	CPHXL
506	rs8030331	chr15	99733939	T	C	6	12	18	0.333333	0.540514	0	0.942932	0.993884	0.968408	TRUE	CPHXL
507	rs8044	chr19	49150749	T	G	32	2	34	0.941176	0.540514	1	0.0362589	0.385362	0.21081	TRUE	CPHXL
508	rs8050598	chr16	49858053	C	T	8	2	10	0.8	0.540514	1	0.00603715	0.207978	0.107008	TRUE	CPHXL
509	rs8051558	chr16	88570647	C	G	2	6	8	0.25	0.540514	0	0.878638	0.995965	0.937302	TRUE	CPHXL
510	rs8060268	chr16	31333959	T	C	8	2	10	0.8	0.540514	1	0.00603715	0.207978	0.107008	TRUE	CPHXL
511	rs8065812	chr17	8436176	C	T	12	6	18	0.666667	0.540514	0.666667	0.294827	0.71509	0.504959	FALSE	CPHXL
512	rs8077209	chr17	82205345	T	C	16	2	18	0.888889	0.540514	1	0.020956	0.301046	0.161001	TRUE	CPHXL
513	rs8079253	chr17	10317443	G	A	4	4	8	0.5	0.540514	1	0.00290702	0.0425797	0.0227433	TRUE	CPHXL
514	rs8102492	chr19	48637552	A	C	2	16	18	0.111111	0.540514	0	0.77565	0.984538	0.880094	TRUE	CPHXL
515	rs8141941	chr22	19178750	G	A	12	4	16	0.75	0.540514	0.333333	0.678711	0.945566	0.812138	TRUE	CPHXL
516	rs847687	chr17	50152080	T	G	12	12	24	0.5	0.540514	0	0.97882	0.995163	0.986991	TRUE	CPHXL
517	rs884309	chr3	192409198	G	T	8	6	14	0.571429	0.540514	0.5	0.359468	0.789221	0.574344	FALSE	CPHXL
518	rs885675	chr17	19004360	G	C	10	4	14	0.714286	0.540514	0.285714	0.688032	0.958204	0.823118	TRUE	CPHXL
519	rs9296703	chr6	53172104	T	G	2	16	18	0.111111	0.540514	0	0.77565	0.984538	0.880094	TRUE	CPHXL
520	rs930392	chr16	30183519	A	G	22	10	32	0.6875	0.540514	0.6	0.432689	0.770053	0.601371	FALSE	CPHXL
521	rs9308665	chr2	112055814	C	G	10	12	22	0.454545	0.540514	0	0.973637	0.994378	0.984007	TRUE	CPHXL
522	rs937614	chr11	2305690	C	G	8	2	10	0.8	0.540514	1	0.00603715	0.207978	0.107008	TRUE	CPHXL
523	rs939348	chr17	40075600	T	C	6	12	18	0.333333	0.540514	1	0.00227289	0.012207	0.00723992	TRUE	CPHXL
524	rs951126	chr17	79659112	C	T	2	10	12	0.166667	0.540514	1	0.00136634	0.00861589	0.00499112	TRUE	CPHXL
525	rs9556411	chr13	94711630	G	C	4	4	8	0.5	0.540514	1	0.00290702	0.0425797	0.0227433	TRUE	CPHXL
526	rs9607636	chr22	39349693	G	T	8	12	20	0.4	0.540514	0.8	0.0710824	0.291886	0.181484	TRUE	CPHXL
527	rs9610804	chr22	37560207	A	G	10	16	26	0.384615	0.540514	0.333333	0.389735	0.741449	0.565592	FALSE	CPHXL
528	rs9610955	chr22	20436436	C	G	10	12	22	0.454545	0.540514	0.666667	0.167422	0.485947	0.326684	FALSE	CPHXL
529	rs968406	chr5	177608057	G	C	2	14	16	0.125	0.540514	0	0.79539	0.98598	0.890685	TRUE	CPHXL
530	rs968567	chr11	61828092	C	T	8	12	20	0.4	0.540514	0.75	0.0964066	0.352003	0.224205	TRUE	CPHXL
531	rs9850927	chr3	44242033	A	G	2	4	6	0.333333	0.540514	0	0.902248	0.996544	0.949396	TRUE	CPHXL
532	rs9889349	chr17	2633225	T	A	10	2	12	0.833333	0.540514	1	0.011207	0.21836	0.114784	TRUE	CPHXL
533	rs9899845	chr17	56960701	T	C	8	6	14	0.571429	0.540514	0.5	0.359468	0.789221	0.574344	FALSE	CPHXL
534	rs9900753	chr17	9021258	G	A	12	16	28	0.428571	0.540514	1	0.00381962	0.0152686	0.0095441	TRUE	CPHXL
535	rs9928139	chr16	1942811	A	T	2	16	18	0.111111	0.540514	0	0.77565	0.984538	0.880094	TRUE	CPHXL
536	rs9932922	chr16	71884275	T	C	4	12	16	0.25	0.540514	0.6	0.0905647	0.411407	0.250986	FALSE	CPHXL
537	rs9933198	chr16	28877088	C	T	4	4	8	0.5	0.540514	0.5	0.246485	0.759607	0.503046	FALSE	CPHXL
538	rs9982678	chr21	45000109	C	T	4	12	16	0.25	0.540514	0	0.917121	0.9928	0.954961	TRUE	CPHXL
1	rs10225507	chr7	27130964	C	T	8	10	18	0.444444	0.5703	0.375	0.397245	0.776418	0.586832	FALSE	CPHXL2
2	rs10753357	chr1	4068310	A	C	4	8	12	0.333333	0.5703	1	0.00368998	0.0163821	0.0100361	TRUE	CPHXL2
3	rs10915962	chr1	226223616	C	T	10	14	24	0.416667	0.5703	0.333333	0.410659	0.769842	0.590251	FALSE	CPHXL2
4	rs1106797	chr21	43750404	A	G	2	12	14	0.142857	0.5703	0	0.834286	0.98986	0.912073	TRUE	CPHXL2
5	rs11075777	chr16	70680384	G	A	6	6	12	0.5	0.5703	1	0.00451129	0.0342633	0.0193873	TRUE	CPHXL2
6	rs112137728	chr12	26125285	G	C	2	20	22	0.0909091	0.5703	0.2	0.159349	0.632006	0.395677	FALSE	CPHXL2
7	rs112215462	chr2	24920539	G	C	6	12	18	0.333333	0.5703	0.5	0.198891	0.584991	0.391941	FALSE	CPHXL2
8	rs112360628	chrX	121047512	C	G	2	2	4	0.5	0.5703	0	0.933144	0.998509	0.965827	TRUE	CPHXL2
9	rs112551948	chr22	49718863	A	C	6	2	8	0.75	0.5703	1	0.00445917	0.188207	0.0963331	TRUE	CPHXL2
10	rs112652199	chr19	10416598	C	G	10	12	22	0.454545	0.5703	0.6	0.224232	0.578985	0.401609	FALSE	CPHXL2
11	rs112657916	chr6	127516212	A	G	4	22	26	0.153846	0.5703	0	0.874414	0.980855	0.927634	TRUE	CPHXL2
12	rs112797371	chr17	81345818	C	T	20	2	22	0.909091	0.5703	1	0.0249528	0.321072	0.173013	TRUE	CPHXL2
13	rs113321069	chr17	81004185	A	T	4	2	6	0.666667	0.5703	0	0.97552	0.998867	0.987194	TRUE	CPHXL2
14	rs114982608	chr1	941767	G	A	16	12	28	0.571429	0.5703	0.166667	0.771164	0.931383	0.851273	TRUE	CPHXL2
15	rs115157601	chr2	207227447	C	A	2	6	8	0.25	0.5703	0	0.888748	0.99618	0.942464	TRUE	CPHXL2
16	rs11641847	chr16	85378328	C	A	8	6	14	0.571429	0.5703	0	0.980017	0.997018	0.988518	TRUE	CPHXL2
17	rs11656035	chr17	18182711	T	C	24	2	26	0.923077	0.5703	1	0.0241644	0.351905	0.188035	TRUE	CPHXL2
18	rs117022703	chr11	10541133	G	A	6	4	10	0.6	0.5703	0.333333	0.521067	0.927588	0.724327	FALSE	CPHXL2
19	rs117064964	chr8	38901710	C	T	6	16	22	0.272727	0.5703	0.333333	0.258021	0.648981	0.453501	FALSE	CPHXL2
20	rs117990130	chr16	89720932	C	T	10	26	36	0.277778	0.5703	0.454545	0.206131	0.492834	0.349482	FALSE	CPHXL2
21	rs11802454	chr1	170302530	A	G	8	2	10	0.8	0.5703	1	0.00837655	0.214697	0.111537	TRUE	CPHXL2
22	rs11908739	chr21	37648046	T	C	20	2	22	0.909091	0.5703	1	0.0249528	0.321072	0.173013	TRUE	CPHXL2
23	rs11908910	chr21	45913034	C	T	4	8	12	0.333333	0.5703	0	0.942595	0.993302	0.967949	TRUE	CPHXL2
24	rs11950215	chr5	151720282	T	C	2	12	14	0.142857	0.5703	0	0.834286	0.98986	0.912073	TRUE	CPHXL2
25	rs12134070	chr1	175314454	A	G	6	2	8	0.75	0.5703	0.5	0.445809	0.919286	0.682547	FALSE	CPHXL2
26	rs12313702	chr12	43201214	C	A	8	6	14	0.571429	0.5703	0.5	0.36586	0.78806	0.57696	FALSE	CPHXL2
27	rs12563427	chr1	225882982	C	T	16	10	26	0.615385	0.5703	1	0.00822099	0.0315703	0.0198956	TRUE	CPHXL2
28	rs12835015	chrX	102042867	A	G	4	6	10	0.4	0.5703	1	0.00434089	0.0265078	0.0154243	TRUE	CPHXL2
29	rs12883151	chr14	92323733	A	G	6	10	16	0.375	0.5703	0.666667	0.117943	0.459513	0.288728	FALSE	CPHXL2
30	rs12926991	chr16	2447009	C	T	2	2	4	0.5	0.5703	0.5	0.224353	0.835737	0.530045	FALSE	CPHXL2
31	rs12969307	chr18	10091388	A	G	8	2	10	0.8	0.5703	1	0.00837655	0.214697	0.111537	TRUE	CPHXL2
32	rs12999384	chr2	227473042	C	G	2	8	10	0.2	0.5703	0	0.868063	0.99337	0.930717	TRUE	CPHXL2
33	rs1383116	chr12	26125146	C	A	8	2	10	0.8	0.5703	0.333333	0.673396	0.964331	0.818863	TRUE	CPHXL2
34	rs138808588	chr13	42040386	T	C	8	14	22	0.363636	0.5703	0	0.959974	0.993831	0.976902	TRUE	CPHXL2
35	rs1406815	chr16	728158	C	G	10	10	20	0.5	0.5703	0.5	0.319296	0.691816	0.505556	FALSE	CPHXL2
36	rs141315553	chr2	11466231	C	G	40	2	42	0.952381	0.5703	1	0.043237	0.431141	0.237189	FALSE	CPHXL2
37	rs145188743	chr19	3062695	C	T	6	4	10	0.6	0.5703	1	0.00312027	0.0682359	0.0356781	TRUE	CPHXL2
38	rs148383532	chr16	11797264	G	A	14	6	20	0.7	0.5703	0.666667	0.332877	0.745975	0.539426	FALSE	CPHXL2
39	rs166720	chr19	31001327	T	G	2	8	10	0.2	0.5703	0	0.868063	0.99337	0.930717	TRUE	CPHXL2
40	rs16940363	chr16	86061507	T	C	2	8	10	0.2	0.5703	0	0.868063	0.99337	0.930717	TRUE	CPHXL2
41	rs182730783	chr13	101917077	G	A	4	6	10	0.4	0.5703	0	0.949209	0.996259	0.972734	TRUE	CPHXL2
42	rs1862584	chr5	37863570	G	A	8	4	12	0.666667	0.5703	1	0.00738832	0.0750649	0.0412266	TRUE	CPHXL2
43	rs189941834	chr9	96854388	C	A	18	2	20	0.9	0.5703	1	0.0225664	0.321844	0.172205	TRUE	CPHXL2
44	rs191042791	chr11	118531246	C	G	12	2	14	0.857143	0.5703	1	0.0171412	0.27784	0.147491	TRUE	CPHXL2
45	rs1947025	chr2	68251787	A	G	12	2	14	0.857143	0.5703	0.5	0.625009	0.956824	0.790916	TRUE	CPHXL2
46	rs201408120	chr1	46303192	G	C	18	6	24	0.75	0.5703	0.5	0.572621	0.875856	0.724239	FALSE	CPHXL2
47	rs2020948	chr21	44063352	G	A	2	10	12	0.166667	0.5703	0	0.850784	0.989377	0.92008	TRUE	CPHXL2
48	rs2162616	chr3	16604687	G	T	6	2	8	0.75	0.5703	1	0.00445917	0.188207	0.0963331	TRUE	CPHXL2
49	rs218722	chr17	3857327	G	T	8	2	10	0.8	0.5703	0.5	0.521917	0.940687	0.731302	FALSE	CPHXL2
50	rs2278049	chr16	77212898	C	G	14	4	18	0.777778	0.5703	0.6	0.485886	0.875239	0.680562	FALSE	CPHXL2
51	rs2297140	chr1	85580878	C	A	4	6	10	0.4	0.5703	0.8	0.0665782	0.39637	0.231474	TRUE	CPHXL2
52	rs2306941	chr1	179229518	T	C	10	16	26	0.384615	0.5703	0	0.967731	0.993799	0.980765	TRUE	CPHXL2
53	rs2668429	chr19	1518371	T	A	2	10	12	0.166667	0.5703	1	0.000986031	0.00974679	0.00536641	TRUE	CPHXL2
54	rs2749575	chr10	37993647	A	G	8	2	10	0.8	0.5703	1	0.00837655	0.214697	0.111537	TRUE	CPHXL2
55	rs281394	chr19	48719762	C	G	18	2	20	0.9	0.5703	1	0.0225664	0.321844	0.172205	TRUE	CPHXL2
56	rs2835960	chr21	37788725	G	A	10	2	12	0.833333	0.5703	1	0.011903	0.238941	0.125422	TRUE	CPHXL2
57	rs28360848	chr17	79832150	C	A	8	6	14	0.571429	0.5703	1	0.00515913	0.0388044	0.0219818	TRUE	CPHXL2
58	rs2839298	chr21	46504056	C	G	14	2	16	0.875	0.5703	1	0.017826	0.289539	0.153683	TRUE	CPHXL2
59	rs28547269	chr21	45505671	C	A	14	2	16	0.875	0.5703	1	0.017826	0.289539	0.153683	TRUE	CPHXL2
60	rs28627520	chrX	108527698	C	T	6	6	12	0.5	0.5703	0.5	0.293801	0.747363	0.520582	FALSE	CPHXL2
61	rs2967512	chr19	36386256	T	C	16	4	20	0.8	0.5703	1	0.0156728	0.117817	0.0667449	TRUE	CPHXL2
62	rs36254	chr19	8260111	C	G	12	2	14	0.857143	0.5703	0.5	0.625009	0.956824	0.790916	TRUE	CPHXL2
63	rs365364	chr6	117263549	G	A	2	14	16	0.125	0.5703	0	0.815275	0.987374	0.901324	TRUE	CPHXL2
64	rs369443983	chr17	82519516	G	A	32	2	34	0.941176	0.5703	1	0.0454653	0.386377	0.215921	TRUE	CPHXL2
65	rs369794182	chrX	40014931	C	T	6	2	8	0.75	0.5703	1	0.00445917	0.188207	0.0963331	TRUE	CPHXL2
66	rs3745961	chr19	38403462	G	A	28	2	30	0.933333	0.5703	1	0.0365358	0.37171	0.204123	TRUE	CPHXL2
67	rs377720541	chr18	34224811	T	G	28	2	30	0.933333	0.5703	1	0.0365358	0.37171	0.204123	TRUE	CPHXL2
68	rs3803790	chr17	74431161	C	T	8	12	20	0.4	0.5703	0	0.968164	0.991936	0.98005	TRUE	CPHXL2
69	rs3924532	chr9	89411966	T	C	6	2	8	0.75	0.5703	1	0.00445917	0.188207	0.0963331	TRUE	CPHXL2
70	rs4268748	chr16	89960104	T	C	2	10	12	0.166667	0.5703	0	0.850784	0.989377	0.92008	TRUE	CPHXL2
71	rs4788003	chr16	27888079	C	T	6	2	8	0.75	0.5703	0.5	0.445809	0.919286	0.682547	FALSE	CPHXL2
72	rs4817404	chr21	31558915	C	G	24	2	26	0.923077	0.5703	0.833333	0.402726	0.865573	0.63415	FALSE	CPHXL2
73	rs55664305	chr19	4851770	T	C	16	2	18	0.888889	0.5703	1	0.0232242	0.304841	0.164032	TRUE	CPHXL2
74	rs57591949	chr19	39126045	C	T	4	20	24	0.166667	0.5703	0.428571	0.122788	0.452157	0.287472	FALSE	CPHXL2
75	rs58324296	chr19	4969188	A	C	16	4	20	0.8	0.5703	0.8	0.275174	0.723972	0.499573	FALSE	CPHXL2
76	rs59165976	chr19	7198460	G	C	12	8	20	0.6	0.5703	0.333333	0.575309	0.873346	0.724328	FALSE	CPHXL2
77	rs59447934	chr14	101173715	T	C	8	2	10	0.8	0.5703	1	0.00837655	0.214697	0.111537	TRUE	CPHXL2
78	rs6033858	chr20	1467025	C	T	18	14	32	0.5625	0.5703	0.833333	0.122565	0.337759	0.230162	TRUE	CPHXL2
79	rs60495355	chr21	46422422	C	T	4	14	18	0.222222	0.5703	0	0.913259	0.990517	0.951888	TRUE	CPHXL2
80	rs6053839	chr20	675413	C	T	4	4	8	0.5	0.5703	1	0.00313415	0.0440827	0.0236084	TRUE	CPHXL2
81	rs6137445	chr20	21809165	A	G	2	14	16	0.125	0.5703	0	0.815275	0.987374	0.901324	TRUE	CPHXL2
82	rs61820086	chr1	150302305	T	A	4	2	6	0.666667	0.5703	1	0.00444033	0.140104	0.0722721	TRUE	CPHXL2
83	rs62397195	chr6	40978993	G	A	2	12	14	0.142857	0.5703	0	0.834286	0.98986	0.912073	TRUE	CPHXL2
84	rs6511695	chr19	10364024	C	T	2	6	8	0.25	0.5703	1	0.00167544	0.0142052	0.00794031	TRUE	CPHXL2
85	rs6583309	chr3	196431902	G	A	8	8	16	0.5	0.5703	0.5	0.316505	0.728284	0.522394	FALSE	CPHXL2
86	rs6603805	chr1	1890186	G	A	10	10	20	0.5	0.5703	0.4	0.410616	0.773625	0.59212	FALSE	CPHXL2
87	rs6645560	chrX	119370970	C	T	6	2	8	0.75	0.5703	0.5	0.445809	0.919286	0.682547	FALSE	CPHXL2
88	rs6645621	chrX	120131233	G	A	8	2	10	0.8	0.5703	0	0.989314	0.999524	0.994419	TRUE	CPHXL2
89	rs6661240	chr1	200669719	A	G	22	6	28	0.785714	0.5703	1	0.0176244	0.0871513	0.0523879	TRUE	CPHXL2
90	rs6676565	chr1	1890770	C	T	6	10	16	0.375	0.5703	0.25	0.452935	0.841154	0.647044	FALSE	CPHXL2
91	rs687351	chr8	60652088	A	C	2	14	16	0.125	0.5703	0.25	0.166332	0.641738	0.404035	FALSE	CPHXL2
92	rs694672	chr19	3708399	G	C	2	8	10	0.2	0.5703	0	0.868063	0.99337	0.930717	TRUE	CPHXL2
93	rs7094977	chr10	100745886	C	A	8	2	10	0.8	0.5703	1	0.00837655	0.214697	0.111537	TRUE	CPHXL2
94	rs72619589	chr22	50343347	G	C	16	2	18	0.888889	0.5703	1	0.0232242	0.304841	0.164032	TRUE	CPHXL2
95	rs72716547	chr5	7924673	G	C	6	6	12	0.5	0.5703	0	0.967611	0.995304	0.981458	TRUE	CPHXL2
96	rs73218815	chrX	119944407	C	A	10	2	12	0.833333	0.5703	0	0.992032	0.999721	0.995876	TRUE	CPHXL2
97	rs73530179	chr16	30096460	A	G	34	2	36	0.944444	0.5703	1	0.0370819	0.416011	0.226547	FALSE	CPHXL2
98	rs73691586	chr8	66775089	T	C	2	10	12	0.166667	0.5703	0.5	0.0666239	0.468953	0.267789	FALSE	CPHXL2
99	rs7370843	chr2	241734689	A	G	8	16	24	0.333333	0.5703	0.5	0.199811	0.537826	0.368818	FALSE	CPHXL2
100	rs7530620	chr1	241705870	C	T	6	6	12	0.5	0.5703	0	0.967611	0.995304	0.981458	TRUE	CPHXL2
101	rs76235422	chr17	82520527	C	T	8	12	20	0.4	0.5703	0	0.968164	0.991936	0.98005	TRUE	CPHXL2
102	rs764482	chr21	38661737	C	G	6	6	12	0.5	0.5703	0	0.967611	0.995304	0.981458	TRUE	CPHXL2
103	rs8100801	chr19	58380693	A	G	38	2	40	0.95	0.5703	1	0.0449814	0.430267	0.237624	FALSE	CPHXL2
104	rs847687	chr17	50152080	T	G	10	10	20	0.5	0.5703	0.2	0.653478	0.90913	0.781304	TRUE	CPHXL2
105	rs885675	chr17	19004360	G	C	16	4	20	0.8	0.5703	0.5	0.603144	0.9165	0.759822	TRUE	CPHXL2
106	rs9555673	chr13	110137139	A	T	8	2	10	0.8	0.5703	1	0.00837655	0.214697	0.111537	TRUE	CPHXL2
107	rs9577390	chr13	112782845	C	T	6	2	8	0.75	0.5703	1	0.00445917	0.188207	0.0963331	TRUE	CPHXL2
108	rs9983486	chr21	31088446	G	A	2	6	8	0.25	0.5703	0	0.888748	0.99618	0.942464	TRUE	CPHXL2
1	rs10422762	chr19	35666265	G	A	4	2	6	0.666667	0.476589	0.666667	0.172402	0.760579	0.466491	FALSE	CREB1
2	rs111741904	chr19	40530584	G	A	4	18	22	0.181818	0.476589	0	0.877407	0.986138	0.931773	TRUE	CREB1
3	rs112749718	chr16	560162	T	G	2	4	6	0.333333	0.476589	1	0.000977599	0.0251881	0.0130828	TRUE	CREB1
4	rs113708270	chr20	5001472	T	G	2	2	4	0.5	0.476589	0.5	0.196982	0.808985	0.502983	FALSE	CREB1
5	rs115131679	chr3	184562381	G	A	2	4	6	0.333333	0.476589	0	0.874627	0.996902	0.935764	TRUE	CREB1
6	rs115479386	chr5	93395001	G	A	2	2	4	0.5	0.476589	1	0.000951076	0.0742932	0.0376221	TRUE	CREB1
7	rs11548434	chr17	18858195	G	A	8	2	10	0.8	0.476589	0.8	0.184127	0.716955	0.450541	FALSE	CREB1
8	rs11668478	chr19	46624373	G	A	4	2	6	0.666667	0.476589	0.5	0.32658	0.874609	0.600595	FALSE	CREB1
9	rs12000219	chr9	4490513	C	G	12	2	14	0.857143	0.476589	1	0.0132847	0.221811	0.117548	TRUE	CREB1
10	rs12166817	chr22	39350419	C	A	4	2	6	0.666667	0.476589	0.714286	0.160767	0.701381	0.431074	FALSE	CREB1
11	rs12890396	chr14	105049889	C	T	2	8	10	0.2	0.476589	0.4	0.11758	0.603724	0.360652	FALSE	CREB1
12	rs144454089	chr12	133219299	G	A	4	2	6	0.666667	0.476589	0	0.967843	0.99721	0.982526	TRUE	CREB1
13	rs1456621	chr12	131672178	C	T	2	6	8	0.25	0.476589	0.5	0.105776	0.565505	0.33564	FALSE	CREB1
14	rs146831812	chr11	76654026	C	A	2	2	4	0.5	0.476589	1	0.000951076	0.0742932	0.0376221	TRUE	CREB1
15	rs1667605	chr2	74147757	G	A	6	4	10	0.6	0.476589	0.166667	0.680856	0.952535	0.816696	TRUE	CREB1
16	rs184474736	chr22	43411714	C	A	4	6	10	0.4	0.476589	0.666667	0.111334	0.521317	0.316325	FALSE	CREB1
17	rs1862731	chr16	85751154	G	A	2	6	8	0.25	0.476589	0	0.854917	0.994539	0.924728	TRUE	CREB1
18	rs187984232	chr20	62861010	C	A	2	4	6	0.333333	0.476589	0	0.874627	0.996902	0.935764	TRUE	CREB1
19	rs2031628	chr14	60249298	C	G	4	6	10	0.4	0.476589	0	0.939855	0.994735	0.967295	TRUE	CREB1
20	rs2045456	chr5	9011158	A	C	2	2	4	0.5	0.476589	1	0.000951076	0.0742932	0.0376221	TRUE	CREB1
21	rs2070380	chr21	32317982	C	A	8	2	10	0.8	0.476589	1	0.0120439	0.172492	0.0922681	TRUE	CREB1
22	rs2272983	chr1	11654311	T	G	2	8	10	0.2	0.476589	0	0.836369	0.992381	0.914375	TRUE	CREB1
23	rs2319459	chr22	49849285	C	T	2	2	4	0.5	0.476589	0.75	0.0650975	0.594043	0.32957	FALSE	CREB1
24	rs2513289	chr11	68652187	A	C	2	2	4	0.5	0.476589	1	0.000951076	0.0742932	0.0376221	TRUE	CREB1
25	rs281394	chr19	48719762	C	G	4	8	12	0.333333	0.476589	0.25	0.338164	0.800462	0.569313	FALSE	CREB1
26	rs28374894	chr17	18858346	C	A	6	8	14	0.428571	0.476589	0.428571	0.281712	0.728751	0.505232	FALSE	CREB1
27	rs28408686	chr17	32519606	C	G	2	8	10	0.2	0.476589	0.333333	0.124986	0.637672	0.381329	FALSE	CREB1
28	rs28444867	chr15	83107504	C	A	2	8	10	0.2	0.476589	0.75	0.0263068	0.274244	0.150276	TRUE	CREB1
29	rs3218026	chr19	29812231	C	A	2	2	4	0.5	0.476589	0.25	0.357034	0.911628	0.634331	FALSE	CREB1
30	rs35003	chr5	16616990	A	G	2	4	6	0.333333	0.476589	0.75	0.0384727	0.433003	0.235738	FALSE	CREB1
31	rs3761925	chr1	6701642	C	T	10	4	14	0.714286	0.476589	0.5	0.446907	0.852712	0.64981	FALSE	CREB1
32	rs4805605	chr19	30726407	A	T	8	6	14	0.571429	0.476589	1	0.0060105	0.035606	0.0208083	TRUE	CREB1
33	rs4989100	chr1	202144707	T	G	6	4	10	0.6	0.476589	0.333333	0.468824	0.895269	0.682047	FALSE	CREB1
34	rs55640917	chr17	1488414	A	G	8	6	14	0.571429	0.476589	0.5	0.344702	0.777238	0.56097	FALSE	CREB1
35	rs57122454	chr19	7862579	G	C	2	2	4	0.5	0.476589	0	0.90861	0.998715	0.953663	TRUE	CREB1
36	rs57345398	chr17	49280088	G	C	4	2	6	0.666667	0.476589	1	0.00475966	0.102433	0.0535966	TRUE	CREB1
37	rs5750495	chr22	37783113	T	A	4	8	12	0.333333	0.476589	0	0.925421	0.995884	0.960653	TRUE	CREB1
38	rs57591949	chr19	39126045	C	T	2	10	12	0.166667	0.476589	0.272727	0.162134	0.668489	0.415312	FALSE	CREB1
39	rs58324296	chr19	4969188	A	C	10	4	14	0.714286	0.476589	0.5	0.446907	0.852712	0.64981	FALSE	CREB1
40	rs6062498	chr20	63707707	C	G	4	4	8	0.5	0.476589	0.5	0.246794	0.771027	0.508911	FALSE	CREB1
41	rs6695848	chr1	234313611	G	C	6	6	12	0.5	0.476589	0.25	0.510007	0.889502	0.699755	FALSE	CREB1
42	rs7216465	chr17	31549738	T	C	2	10	12	0.166667	0.476589	0.333333	0.0957251	0.584441	0.340083	FALSE	CREB1
43	rs752503	chr19	33241688	C	T	2	2	4	0.5	0.476589	0	0.90861	0.998715	0.953663	TRUE	CREB1
44	rs79381401	chr1	212624749	G	A	4	2	6	0.666667	0.476589	1	0.00475966	0.102433	0.0535966	TRUE	CREB1
45	rs8080539	chr17	80992208	G	C	6	4	10	0.6	0.476589	1	0.00360266	0.0532517	0.0284272	TRUE	CREB1
46	rs8138196	chr22	30260646	A	G	6	2	8	0.75	0.476589	0.5	0.414905	0.895677	0.655291	FALSE	CREB1
1	rs1001745	chr2	46547920	T	C	18	4	22	0.818182	0.558545	0.333333	0.762351	0.959732	0.861041	TRUE	CRX
2	rs10059912	chr5	43543549	T	C	2	20	22	0.0909091	0.558545	0.333333	0.0893426	0.467355	0.278349	FALSE	CRX
3	rs1009156	chr22	46538704	G	A	4	4	8	0.5	0.558545	1	0.00254167	0.0420938	0.0223177	TRUE	CRX
4	rs10132281	chr14	32427510	G	T	12	6	18	0.666667	0.558545	1	0.00939366	0.0499205	0.0296571	TRUE	CRX
5	rs1022312	chr2	9900222	A	G	38	32	70	0.542857	0.558545	1	0.00780993	0.0178845	0.0128472	TRUE	CRX
6	rs10238493	chr7	26348802	G	A	4	8	12	0.333333	0.558545	0.666667	0.10124	0.475427	0.288333	FALSE	CRX
7	rs10241282	chr7	149662777	G	A	4	8	12	0.333333	0.558545	1	0.00333452	0.0155729	0.0094537	TRUE	CRX
8	rs10252238	chr7	157139592	C	G	2	10	12	0.166667	0.558545	0	0.849547	0.991725	0.920636	TRUE	CRX
9	rs1029391	chr7	96187919	C	A	6	12	18	0.333333	0.558545	0	0.94226	0.990568	0.966414	TRUE	CRX
10	rs1031507	chr2	191155892	A	C	24	40	64	0.375	0.558545	1	0.00376329	0.00957261	0.00666795	TRUE	CRX
11	rs1036932	chr18	50841886	T	C	24	4	28	0.857143	0.558545	1	0.0179704	0.16257	0.0902704	TRUE	CRX
12	rs10417381	chr19	3036352	T	C	2	6	8	0.25	0.558545	0.5	0.09417	0.579486	0.336828	FALSE	CRX
13	rs10430272	chr1	223471914	T	C	6	8	14	0.428571	0.558545	0	0.963958	0.996319	0.980139	TRUE	CRX
14	rs10469607	chr2	237996150	G	A	16	14	30	0.533333	0.558545	1	0.00580717	0.0223061	0.0140567	TRUE	CRX
15	rs10493015	chr1	22461731	A	G	8	24	32	0.25	0.558545	0.5	0.144885	0.431107	0.287996	FALSE	CRX
16	rs10496987	chr2	145745391	T	C	2	10	12	0.166667	0.558545	0.5	0.0815084	0.469809	0.275659	FALSE	CRX
17	rs10498527	chr14	69083045	C	T	2	12	14	0.142857	0.558545	0	0.825968	0.98797	0.906969	TRUE	CRX
18	rs10514505	chr16	80672780	G	C	4	14	18	0.222222	0.558545	0	0.905916	0.989581	0.947749	TRUE	CRX
19	rs10518707	chr15	67073284	A	G	12	4	16	0.75	0.558545	1	0.0117491	0.0921831	0.0519661	TRUE	CRX
20	rs10744008	chr12	12803935	C	T	2	6	8	0.25	0.558545	0	0.885201	0.995929	0.940565	TRUE	CRX
21	rs10752794	chr1	232599702	C	G	26	2	28	0.928571	0.558545	0.75	0.541093	0.929564	0.735329	FALSE	CRX
22	rs1075368	chr1	7557711	G	A	10	6	16	0.625	0.558545	0.5	0.403257	0.798046	0.600652	FALSE	CRX
23	rs10768024	chr11	33732931	T	C	12	12	24	0.5	0.558545	1	0.00570131	0.0199175	0.0128094	TRUE	CRX
24	rs10788883	chr1	48216362	A	C	20	6	26	0.769231	0.558545	1	0.013912	0.0832899	0.0486009	TRUE	CRX
25	rs10797659	chr1	145771120	T	C	10	22	32	0.3125	0.558545	1	0.00192293	0.00885945	0.00539119	TRUE	CRX
26	rs10853336	chr18	6367400	G	A	64	2	66	0.969697	0.558545	1	0.0839981	0.509949	0.296973	FALSE	CRX
27	rs10875976	chr12	49832684	G	A	32	4	36	0.888889	0.558545	0	0.997544	0.999347	0.998446	TRUE	CRX
28	rs10915962	chr1	226223616	C	T	4	12	16	0.25	0.558545	0	0.91351	0.99356	0.953535	TRUE	CRX
29	rs11032380	chr11	33778987	A	T	10	6	16	0.625	0.558545	0	0.984909	0.997107	0.991008	TRUE	CRX
30	rs11042227	chr11	9230526	C	T	12	10	22	0.545455	0.558545	0	0.982347	0.995454	0.988901	TRUE	CRX
31	rs11107349	chr12	94053338	C	T	8	20	28	0.285714	0.558545	1	0.00275382	0.00792931	0.00534156	TRUE	CRX
32	rs11119883	chr1	212213918	T	G	12	24	36	0.333333	0.558545	0	0.960126	0.990862	0.975494	TRUE	CRX
33	rs11160833	chr14	105090717	C	G	26	4	30	0.866667	0.558545	1	0.0193776	0.173865	0.0966212	TRUE	CRX
34	rs11170764	chr12	39108653	A	G	16	6	22	0.727273	0.558545	1	0.0108192	0.07467	0.0427446	TRUE	CRX
35	rs112299555	chr1	43650520	C	T	6	10	16	0.375	0.558545	1	0.00254161	0.0156645	0.00910308	TRUE	CRX
36	rs112498700	chr11	33058861	G	C	2	16	18	0.111111	0.558545	0	0.794518	0.987642	0.89108	TRUE	CRX
37	rs1126045	chr16	77988026	A	G	10	6	16	0.625	0.558545	1	0.00777459	0.0462494	0.027012	TRUE	CRX
38	rs112991950	chr17	50055743	A	C	10	2	12	0.833333	0.558545	1	0.0111615	0.227652	0.119407	TRUE	CRX
39	rs1130664	chr17	81860484	T	G	8	2	10	0.8	0.558545	1	0.00847766	0.215253	0.111866	TRUE	CRX
40	rs1132802	chr17	81703243	T	C	8	6	14	0.571429	0.558545	1	0.00631013	0.0421005	0.0242053	TRUE	CRX
41	rs114147554	chr7	5427321	T	A	16	6	22	0.727273	0.558545	0.5	0.536462	0.87769	0.707076	FALSE	CRX
42	rs114188545	chr19	30224761	C	A	32	2	34	0.941176	0.558545	1	0.032003	0.383158	0.20758	TRUE	CRX
43	rs114667483	chr5	34657322	G	T	24	2	26	0.923077	0.558545	1	0.0291985	0.345015	0.187107	TRUE	CRX
44	rs11528908	chr10	46523434	G	C	12	4	16	0.75	0.558545	0.333333	0.686456	0.941907	0.814182	TRUE	CRX
45	rs1154384	chr3	9176167	G	T	18	14	32	0.5625	0.558545	0	0.98706	0.996686	0.991873	TRUE	CRX
46	rs115818874	chr6	42726768	G	T	26	2	28	0.928571	0.558545	1	0.0297644	0.353222	0.191493	TRUE	CRX
47	rs11589067	chr1	1832335	G	A	8	6	14	0.571429	0.558545	0	0.977732	0.996123	0.986927	TRUE	CRX
48	rs116096240	chr6	149613850	T	C	32	2	34	0.941176	0.558545	1	0.032003	0.383158	0.20758	TRUE	CRX
49	rs116172436	chr19	48469633	C	T	4	4	8	0.5	0.558545	1	0.00254167	0.0420938	0.0223177	TRUE	CRX
50	rs11631785	chr15	67087642	C	T	10	20	30	0.333333	0.558545	0.5	0.209617	0.515838	0.362728	FALSE	CRX
51	rs11641520	chr16	11871533	C	G	26	8	34	0.764706	0.558545	1	0.0156385	0.0704283	0.0430334	TRUE	CRX
52	rs11647817	chr16	78003070	A	G	4	8	12	0.333333	0.558545	0.5	0.165268	0.616642	0.390955	FALSE	CRX
53	rs11654671	chr17	4829172	A	T	30	16	46	0.652174	0.558545	1	0.00941074	0.031488	0.0204494	TRUE	CRX
54	rs11666229	chr19	8238315	A	G	8	6	14	0.571429	0.558545	1	0.00631013	0.0421005	0.0242053	TRUE	CRX
55	rs11668332	chr19	41931584	G	T	2	10	12	0.166667	0.558545	0.333333	0.150368	0.644984	0.397676	FALSE	CRX
56	rs116745133	chr19	38316395	C	G	6	38	44	0.136364	0.558545	0	0.868123	0.971562	0.919842	TRUE	CRX
57	rs116944008	chr7	127741848	C	T	8	22	30	0.266667	0.558545	1	0.00130746	0.00711678	0.00421212	TRUE	CRX
58	rs117009988	chr19	18636238	G	A	12	6	18	0.666667	0.558545	1	0.00939366	0.0499205	0.0296571	TRUE	CRX
59	rs11712694	chr3	155895602	C	T	10	4	14	0.714286	0.558545	1	0.00884603	0.0790938	0.0439699	TRUE	CRX
60	rs11764740	chr7	114530197	A	G	12	14	26	0.461538	0.558545	0.25	0.564465	0.853532	0.708999	FALSE	CRX
61	rs11948322	chr5	10306334	C	T	2	10	12	0.166667	0.558545	0.5	0.0815084	0.469809	0.275659	FALSE	CRX
62	rs12013629	chrX	123865142	T	A	8	2	10	0.8	0.558545	0.6	0.414702	0.893166	0.653934	FALSE	CRX
63	rs12044883	chr1	93355018	G	A	14	6	20	0.7	0.558545	0.5	0.498384	0.858308	0.678346	FALSE	CRX
64	rs12104935	chr2	110106331	G	A	10	12	22	0.454545	0.558545	0	0.971276	0.99365	0.982463	TRUE	CRX
65	rs12139824	chr1	225627336	A	C	26	14	40	0.65	0.558545	1	0.0104993	0.033584	0.0220416	TRUE	CRX
66	rs12148825	chr15	99306407	C	G	52	28	80	0.65	0.558545	1	0.0139685	0.0273915	0.02068	TRUE	CRX
67	rs12149160	chr16	11345446	G	T	10	14	24	0.416667	0.558545	0	0.967536	0.992911	0.980223	TRUE	CRX
68	rs1223090	chr11	31478158	G	A	8	16	24	0.333333	0.558545	0.5	0.197051	0.53783	0.367441	FALSE	CRX
69	rs12276878	chr11	15250241	A	G	28	20	48	0.583333	0.558545	1	0.00810534	0.0224753	0.0152903	TRUE	CRX
70	rs12306	chr17	27295085	G	T	126	76	202	0.623762	0.558545	0.666667	0.381196	0.525145	0.453171	FALSE	CRX
71	rs12313449	chr12	64450349	A	G	12	10	22	0.545455	0.558545	1	0.00485443	0.0271501	0.0160023	TRUE	CRX
72	rs12366451	chr12	120789159	G	A	4	6	10	0.4	0.558545	1	0.00241544	0.029922	0.0161687	TRUE	CRX
73	rs12417736	chr11	119350236	T	C	18	14	32	0.5625	0.558545	1	0.00727663	0.0229237	0.0151002	TRUE	CRX
74	rs12425024	chr12	65184855	A	T	6	12	18	0.333333	0.558545	0.666667	0.096728	0.397461	0.247094	TRUE	CRX
75	rs12534233	chr7	117682604	C	T	6	16	22	0.272727	0.558545	1	0.00229803	0.00956165	0.00592984	TRUE	CRX
76	rs12586948	chr14	91871998	G	A	16	8	24	0.666667	0.558545	0.25	0.730515	0.926306	0.828411	TRUE	CRX
77	rs12625382	chr20	17678452	G	T	18	16	34	0.529412	0.558545	1	0.00837374	0.0204571	0.0144154	TRUE	CRX
78	rs12747275	chr1	92960984	G	A	2	16	18	0.111111	0.558545	0	0.794518	0.987642	0.89108	TRUE	CRX
79	rs12754081	chr1	214281588	C	G	8	2	10	0.8	0.558545	0.5	0.515698	0.936317	0.726008	FALSE	CRX
80	rs12884929	chr14	71322229	C	T	10	14	24	0.416667	0.558545	0	0.967536	0.992911	0.980223	TRUE	CRX
81	rs12906184	chr15	85584177	A	G	10	4	14	0.714286	0.558545	0	0.988194	0.998918	0.993556	TRUE	CRX
82	rs12940670	chr17	33564425	G	T	28	4	32	0.875	0.558545	0	0.997046	0.999137	0.998091	TRUE	CRX
83	rs1295640	chr1	226882677	C	T	32	12	44	0.727273	0.558545	1	0.0152865	0.0487861	0.0320363	TRUE	CRX
84	rs13017438	chr2	173195004	T	C	14	8	22	0.636364	0.558545	0.5	0.444466	0.810057	0.627261	FALSE	CRX
85	rs13022931	chr2	191156003	A	G	82	74	156	0.525641	0.558545	1	0.00798458	0.0155633	0.0117739	TRUE	CRX
86	rs13023991	chr2	158042432	A	C	10	6	16	0.625	0.558545	0	0.984909	0.997107	0.991008	TRUE	CRX
87	rs130386	chr22	42686472	G	C	10	8	18	0.555556	0.558545	0.5	0.354403	0.751024	0.552713	FALSE	CRX
88	rs131359	chr22	23518687	A	G	16	8	24	0.666667	0.558545	1	0.0108617	0.0448754	0.0278686	TRUE	CRX
89	rs13245191	chr7	51311220	A	G	8	4	12	0.666667	0.558545	1	0.00729795	0.0711462	0.0392221	TRUE	CRX
90	rs13281113	chr8	24218878	G	C	16	6	22	0.727273	0.558545	0	0.991771	0.998428	0.995099	TRUE	CRX
91	rs13311806	chr7	151534210	C	T	12	6	18	0.666667	0.558545	1	0.00939366	0.0499205	0.0296571	TRUE	CRX
92	rs1335318	chr13	92892869	G	A	10	12	22	0.454545	0.558545	0	0.971276	0.99365	0.982463	TRUE	CRX
93	rs13361707	chr5	40791782	C	T	14	42	56	0.25	0.558545	0.5	0.172399	0.391802	0.2821	TRUE	CRX
94	rs13392051	chr2	177712655	T	C	2	6	8	0.25	0.558545	0	0.885201	0.995929	0.940565	TRUE	CRX
95	rs1346779	chr2	174535670	A	T	10	6	16	0.625	0.558545	0.5	0.403257	0.798046	0.600652	FALSE	CRX
96	rs138409227	chr2	231199183	G	A	8	12	20	0.4	0.558545	0	0.968164	0.991936	0.98005	TRUE	CRX
97	rs139455787	chr16	73076056	T	A	148	2	150	0.986667	0.558545	1	0.177927	0.67752	0.427724	FALSE	CRX
98	rs1396448	chr5	176817904	G	T	2	48	50	0.04	0.558545	0	0.608002	0.946202	0.777102	TRUE	CRX
99	rs139800296	chr17	32527019	C	A	20	2	22	0.909091	0.558545	1	0.0193595	0.31837	0.168865	TRUE	CRX
100	rs1410388	chr1	193771135	A	G	12	6	18	0.666667	0.558545	1	0.00939366	0.0499205	0.0296571	TRUE	CRX
101	rs1420467	chr3	169009292	G	A	10	2	12	0.833333	0.558545	1	0.0111615	0.227652	0.119407	TRUE	CRX
102	rs142186138	chr16	79562691	C	G	28	2	30	0.933333	0.558545	1	0.0243075	0.367817	0.196062	TRUE	CRX
103	rs142267586	chr15	76514352	T	A	74	2	76	0.973684	0.558545	1	0.0968071	0.544262	0.320534	FALSE	CRX
104	rs142324065	chr15	92832567	G	A	20	2	22	0.909091	0.558545	1	0.0193595	0.31837	0.168865	TRUE	CRX
105	rs142535263	chr3	184015742	G	T	18	2	20	0.9	0.558545	1	0.0226929	0.310963	0.166828	TRUE	CRX
106	rs143452153	chr2	85605774	G	C	8	4	12	0.666667	0.558545	0.5	0.432449	0.864904	0.648676	FALSE	CRX
107	rs143991728	chrX	115429112	T	G	34	2	36	0.944444	0.558545	1	0.0366067	0.410095	0.223351	FALSE	CRX
108	rs144031794	chr17	8154556	A	T	32	2	34	0.941176	0.558545	1	0.032003	0.383158	0.20758	TRUE	CRX
109	rs145396941	chr7	129780514	C	A	6	6	12	0.5	0.558545	1	0.00267578	0.03213	0.0174029	TRUE	CRX
110	rs146461671	chr17	75035592	G	T	26	2	28	0.928571	0.558545	1	0.0297644	0.353222	0.191493	TRUE	CRX
111	rs146806959	chr7	42133855	G	A	2	10	12	0.166667	0.558545	1	0.000986031	0.00974679	0.00536641	TRUE	CRX
112	rs146952546	chr7	144827895	T	C	20	16	36	0.555556	0.558545	0.25	0.668138	0.868514	0.768326	TRUE	CRX
113	rs147445797	chr22	40610540	T	C	30	4	34	0.882353	0.558545	0	0.997362	0.999148	0.998255	TRUE	CRX
114	rs147884013	chr9	38069767	C	T	20	4	24	0.833333	0.558545	1	0.0199568	0.134248	0.0771023	TRUE	CRX
115	rs1482286	chr12	40099789	A	G	16	20	36	0.444444	0.558545	1	0.00436414	0.014085	0.00922457	TRUE	CRX
116	rs148345148	chr10	119212447	T	G	28	2	30	0.933333	0.558545	1	0.0243075	0.367817	0.196062	TRUE	CRX
117	rs148733203	chr11	82680750	C	A	44	2	46	0.956522	0.558545	1	0.0564275	0.461888	0.259158	FALSE	CRX
118	rs149471163	chr3	177835134	A	G	104	2	106	0.981132	0.558545	1	0.130401	0.613967	0.372184	FALSE	CRX
119	rs1495461	chr7	128911686	T	C	8	8	16	0.5	0.558545	1	0.00392061	0.0261986	0.0150596	TRUE	CRX
120	rs1514675	chr12	43169324	T	C	18	24	42	0.428571	0.558545	0	0.976559	0.991921	0.98424	TRUE	CRX
121	rs1515461	chr3	58237788	A	G	2	8	10	0.2	0.558545	0	0.863869	0.992396	0.928132	TRUE	CRX
122	rs1523300	chr2	70542233	A	C	8	10	18	0.444444	0.558545	1	0.00321801	0.017647	0.0104325	TRUE	CRX
123	rs1539551	chr1	65175641	G	C	8	24	32	0.25	0.558545	1	0.00294127	0.0103704	0.00665585	TRUE	CRX
124	rs1548838	chr12	12786617	T	G	14	36	50	0.28	0.558545	0.8	0.0569817	0.15937	0.108176	TRUE	CRX
125	rs1555886	chr1	153478904	T	G	18	18	36	0.5	0.558545	0	0.97974	0.994358	0.987049	TRUE	CRX
126	rs1565853	chr2	237721593	C	T	14	6	20	0.7	0.558545	0	0.990327	0.998609	0.994468	TRUE	CRX
127	rs1632169	chr18	36129799	G	C	2	10	12	0.166667	0.558545	0	0.849547	0.991725	0.920636	TRUE	CRX
128	rs1656019	chr1	213356757	C	G	20	6	26	0.769231	0.558545	0.333333	0.735164	0.935166	0.835165	TRUE	CRX
129	rs1667605	chr2	74147757	G	A	6	4	10	0.6	0.558545	0	0.9764	0.998129	0.987264	TRUE	CRX
130	rs17038072	chr12	106062795	A	C	12	2	14	0.857143	0.558545	1	0.0110804	0.254686	0.132883	TRUE	CRX
131	rs17141181	chr7	70069084	T	C	10	12	22	0.454545	0.558545	0.666667	0.168394	0.488589	0.328491	FALSE	CRX
132	rs17245785	chr7	43758065	G	A	8	6	14	0.571429	0.558545	0	0.977732	0.996123	0.986927	TRUE	CRX
133	rs1727314	chr12	123156117	C	A	8	8	16	0.5	0.558545	0.5	0.318126	0.728115	0.523121	FALSE	CRX
134	rs17287088	chr13	73535494	G	A	2	10	12	0.166667	0.558545	0.25	0.197048	0.701191	0.449119	FALSE	CRX
135	rs17456473	chr1	87370759	A	T	2	66	68	0.0294118	0.558545	0.333333	0.0264996	0.198455	0.112477	TRUE	CRX
136	rs17470228	chr15	77368003	T	C	28	10	38	0.736842	0.558545	1	0.0153047	0.0502454	0.032775	TRUE	CRX
137	rs17490331	chr2	38015177	G	A	6	10	16	0.375	0.558545	1	0.00254161	0.0156645	0.00910308	TRUE	CRX
138	rs17503428	chr15	95617431	A	C	14	20	34	0.411765	0.558545	0.5	0.282767	0.592402	0.437585	FALSE	CRX
139	rs17573677	chr22	45750729	G	T	10	4	14	0.714286	0.558545	0	0.988194	0.998918	0.993556	TRUE	CRX
140	rs1759203	chr1	16617088	G	A	64	4	68	0.941176	0.558545	1	0.06021	0.336858	0.198534	TRUE	CRX
141	rs17626153	chr2	205610639	T	C	6	8	14	0.428571	0.558545	0	0.963958	0.996319	0.980139	TRUE	CRX
142	rs17788084	chr8	96610720	A	T	6	8	14	0.428571	0.558545	1	0.00174731	0.020924	0.0113356	TRUE	CRX
143	rs17886464	chr17	31286369	G	A	12	20	32	0.375	0.558545	1	0.00292021	0.0124308	0.00767552	TRUE	CRX
144	rs1791642	chr12	52347756	C	T	20	8	28	0.714286	0.558545	0.666667	0.37993	0.739144	0.559537	FALSE	CRX
145	rs181140286	chr7	127897970	C	T	20	18	38	0.526316	0.558545	1	0.00725113	0.0193419	0.0132965	TRUE	CRX
146	rs181366	chr22	21579491	C	T	16	30	46	0.347826	0.558545	0.666667	0.141516	0.330631	0.236073	TRUE	CRX
147	rs1826377	chr5	5916354	A	C	6	12	18	0.333333	0.558545	0.333333	0.321274	0.72403	0.522652	FALSE	CRX
148	rs182999151	chr7	106072146	A	C	50	2	52	0.961538	0.558545	1	0.053018	0.466993	0.260005	FALSE	CRX
149	rs183388117	chr19	35724267	A	G	12	2	14	0.857143	0.558545	1	0.0110804	0.254686	0.132883	TRUE	CRX
150	rs183435218	chr20	33811168	A	C	20	2	22	0.909091	0.558545	1	0.0193595	0.31837	0.168865	TRUE	CRX
151	rs1842267	chr15	94078430	A	G	16	8	24	0.666667	0.558545	1	0.0108617	0.0448754	0.0278686	TRUE	CRX
152	rs184588010	chr12	111313943	G	T	8	8	16	0.5	0.558545	1	0.00392061	0.0261986	0.0150596	TRUE	CRX
153	rs184622750	chr7	133934835	T	A	40	2	42	0.952381	0.558545	1	0.047822	0.437279	0.242551	FALSE	CRX
154	rs185332308	chr11	62879265	T	G	16	2	18	0.888889	0.558545	1	0.0174158	0.297318	0.157367	TRUE	CRX
155	rs1862475	chr19	50639588	G	C	2	4	6	0.333333	0.558545	0.5	0.168363	0.713357	0.44086	FALSE	CRX
156	rs186847526	chr7	70091747	T	G	18	2	20	0.9	0.558545	1	0.0226929	0.310963	0.166828	TRUE	CRX
157	rs1877454	chr1	41789823	C	T	10	12	22	0.454545	0.558545	0	0.971276	0.99365	0.982463	TRUE	CRX
158	rs1882551	chr12	6767122	G	C	14	4	18	0.777778	0.558545	0.75	0.312143	0.758718	0.535431	FALSE	CRX
159	rs1883912	chr1	17111393	A	C	4	8	12	0.333333	0.558545	0	0.939939	0.994154	0.967047	TRUE	CRX
160	rs188696406	chr13	48233956	A	G	34	2	36	0.944444	0.558545	1	0.0366067	0.410095	0.223351	FALSE	CRX
161	rs188861141	chr1	45529848	G	A	8	16	24	0.333333	0.558545	0.5	0.197051	0.53783	0.367441	FALSE	CRX
162	rs188875245	chr12	110250822	C	A	12	2	14	0.857143	0.558545	1	0.0110804	0.254686	0.132883	TRUE	CRX
163	rs1892915	chr21	36989963	T	C	2	14	16	0.125	0.558545	0	0.809544	0.988503	0.899023	TRUE	CRX
164	rs189602855	chr8	101889392	T	C	100	2	102	0.980392	0.558545	1	0.123029	0.609607	0.366318	FALSE	CRX
165	rs189684248	chr1	204494174	A	C	16	2	18	0.888889	0.558545	1	0.0174158	0.297318	0.157367	TRUE	CRX
166	rs190060108	chr4	41992016	T	G	12	2	14	0.857143	0.558545	1	0.0110804	0.254686	0.132883	TRUE	CRX
167	rs190199354	chr22	45009933	C	T	12	12	24	0.5	0.558545	0	0.97722	0.995039	0.98613	TRUE	CRX
168	rs190208183	chr12	54265574	G	T	72	2	74	0.972973	0.558545	1	0.0972691	0.537153	0.317211	FALSE	CRX
169	rs1905039	chr8	71165822	T	C	6	10	16	0.375	0.558545	0.5	0.204388	0.622192	0.41329	FALSE	CRX
170	rs190676542	chrX	16791094	G	T	36	2	38	0.947368	0.558545	1	0.0283813	0.406099	0.21724	FALSE	CRX
171	rs191677626	chr5	139237026	G	T	38	2	40	0.95	0.558545	1	0.0407352	0.43324	0.236988	FALSE	CRX
172	rs1918137	chr12	67040559	G	A	12	14	26	0.461538	0.558545	0.5	0.31017	0.653135	0.481653	FALSE	CRX
173	rs191883062	chr4	123400136	A	G	18	2	20	0.9	0.558545	1	0.0226929	0.310963	0.166828	TRUE	CRX
174	rs191925020	chr11	16292434	G	T	34	2	36	0.944444	0.558545	1	0.0366067	0.410095	0.223351	FALSE	CRX
175	rs1975703	chr17	48230473	T	C	14	18	32	0.4375	0.558545	1	0.00436414	0.0140967	0.0092304	TRUE	CRX
176	rs1983853	chr1	84845509	C	T	22	20	42	0.52381	0.558545	0.333333	0.558801	0.805216	0.682008	FALSE	CRX
177	rs1986405	chr1	200126807	C	G	20	2	22	0.909091	0.558545	0	0.99737	0.999137	0.998254	TRUE	CRX
178	rs201419141	chr1	67432344	C	A	46	2	48	0.958333	0.558545	1	0.0539193	0.46314	0.25853	FALSE	CRX
179	rs202069939	chr8	26230417	G	T	24	2	26	0.923077	0.558545	1	0.0291985	0.345015	0.187107	TRUE	CRX
180	rs2024133	chr19	13124073	G	A	10	6	16	0.625	0.558545	0	0.984909	0.997107	0.991008	TRUE	CRX
181	rs203563	chr3	9861678	A	G	6	4	10	0.6	0.558545	0	0.9764	0.998129	0.987264	TRUE	CRX
182	rs2038504	chr20	35060384	T	C	4	18	22	0.181818	0.558545	0.5	0.0999401	0.407235	0.253588	FALSE	CRX
183	rs2084636	chr11	122517701	A	G	14	4	18	0.777778	0.558545	1	0.0114994	0.105415	0.0584572	TRUE	CRX
184	rs209677	chr20	33552481	T	C	12	6	18	0.666667	0.558545	0.5	0.450001	0.833032	0.641517	FALSE	CRX
185	rs2098116	chr7	69620378	C	T	6	10	16	0.375	0.558545	1	0.00254161	0.0156645	0.00910308	TRUE	CRX
186	rs2098395	chr12	68146965	A	G	10	12	22	0.454545	0.558545	0	0.971276	0.99365	0.982463	TRUE	CRX
187	rs2131458	chr3	4498542	G	A	8	8	16	0.5	0.558545	1	0.00392061	0.0261986	0.0150596	TRUE	CRX
188	rs2177067	chr2	138636800	C	G	14	6	20	0.7	0.558545	0	0.990327	0.998609	0.994468	TRUE	CRX
189	rs2183601	chr21	45647830	C	T	6	20	26	0.230769	0.558545	0	0.930277	0.986698	0.958487	TRUE	CRX
190	rs2205612	chr1	175207994	T	C	24	28	52	0.461538	0.558545	0.25	0.609407	0.813744	0.711575	TRUE	CRX
191	rs2242194	chr1	155017821	C	G	8	6	14	0.571429	0.558545	0	0.977732	0.996123	0.986927	TRUE	CRX
192	rs2270196	chr19	44002471	C	T	20	2	22	0.909091	0.558545	0.75	0.495089	0.918067	0.706578	FALSE	CRX
193	rs2273804	chr14	100376300	C	G	12	4	16	0.75	0.558545	0	0.990875	0.998839	0.994857	TRUE	CRX
194	rs2287433	chr2	210440934	G	A	8	6	14	0.571429	0.558545	1	0.00631013	0.0421005	0.0242053	TRUE	CRX
195	rs2402273	chr7	117960370	T	C	8	14	22	0.363636	0.558545	0	0.96198	0.994435	0.978207	TRUE	CRX
196	rs2424551	chr20	23414223	G	A	12	6	18	0.666667	0.558545	0.5	0.450001	0.833032	0.641517	FALSE	CRX
197	rs2425001	chr20	34807065	A	T	14	4	18	0.777778	0.558545	0	0.992975	0.999208	0.996092	TRUE	CRX
198	rs249177	chr12	95011497	C	T	8	6	14	0.571429	0.558545	1	0.00631013	0.0421005	0.0242053	TRUE	CRX
199	rs2508759	chr11	76522610	G	A	10	8	18	0.555556	0.558545	0	0.982257	0.995617	0.988937	TRUE	CRX
200	rs2529759	chr7	20818113	T	C	14	2	16	0.875	0.558545	0.5	0.651727	0.9692	0.810464	TRUE	CRX
201	rs2581260	chr8	76581291	T	A	14	18	32	0.4375	0.558545	0.5	0.303479	0.616621	0.46005	FALSE	CRX
202	rs2592177	chr2	70248801	T	G	10	12	22	0.454545	0.558545	0	0.971276	0.99365	0.982463	TRUE	CRX
203	rs2649714	chr12	106178979	G	C	12	2	14	0.857143	0.558545	0	0.993437	0.999661	0.996549	TRUE	CRX
204	rs2667762	chr15	77590075	A	G	20	38	58	0.344828	0.558545	1	0.00305075	0.00927442	0.00616259	TRUE	CRX
205	rs2673346	chr3	123144379	T	C	18	2	20	0.9	0.558545	0	0.99737	0.999137	0.998254	TRUE	CRX
206	rs27118	chr5	14473407	A	G	22	4	26	0.846154	0.558545	1	0.0159126	0.143781	0.079847	TRUE	CRX
207	rs2725355	chr8	31129262	A	C	6	10	16	0.375	0.558545	0.5	0.204388	0.622192	0.41329	FALSE	CRX
208	rs2761156	chr13	99796162	A	C	4	16	20	0.2	0.558545	0	0.902989	0.989289	0.946139	TRUE	CRX
209	rs2789784	chr1	219959023	T	G	8	16	24	0.333333	0.558545	0.333333	0.337306	0.707511	0.522409	FALSE	CRX
210	rs2813876	chr1	23619424	T	C	2	12	14	0.142857	0.558545	0.5	0.0638734	0.430337	0.247105	FALSE	CRX
211	rs2836959	chr21	39251742	T	G	2	28	30	0.0666667	0.558545	0	0.704457	0.967181	0.835819	TRUE	CRX
212	rs28429763	chr1	65390271	G	A	14	6	20	0.7	0.558545	1	0.0100646	0.0603517	0.0352081	TRUE	CRX
213	rs2851501	chr7	69645872	G	A	14	16	30	0.466667	0.558545	0	0.977381	0.994469	0.985925	TRUE	CRX
214	rs28534947	chr1	241999572	C	T	10	18	28	0.357143	0.558545	1	0.00287357	0.0113929	0.00713324	TRUE	CRX
215	rs2854330	chr17	31383745	T	G	18	2	20	0.9	0.558545	0.333333	0.825821	0.986068	0.905945	TRUE	CRX
216	rs285686	chr19	33779941	A	T	40	14	54	0.740741	0.558545	1	0.0181817	0.049514	0.0338478	TRUE	CRX
217	rs28611014	chr22	50296461	C	T	8	6	14	0.571429	0.558545	1	0.00631013	0.0421005	0.0242053	TRUE	CRX
218	rs2889850	chr20	34422841	G	C	8	10	18	0.444444	0.558545	1	0.00321801	0.017647	0.0104325	TRUE	CRX
219	rs2929408	chr3	20041477	C	A	14	6	20	0.7	0.558545	0.333333	0.650546	0.910018	0.780282	TRUE	CRX
220	rs294382	chr11	30585968	A	C	6	4	10	0.6	0.558545	1	0.00450509	0.0704041	0.0374546	TRUE	CRX
221	rs2964462	chr5	5350190	C	T	4	8	12	0.333333	0.558545	1	0.00333452	0.0155729	0.0094537	TRUE	CRX
222	rs3091497	chr20	49028890	G	T	2	16	18	0.111111	0.558545	0	0.794518	0.987642	0.89108	TRUE	CRX
223	rs3092251	chr20	47541305	A	G	12	10	22	0.545455	0.558545	0.666667	0.226239	0.570523	0.398381	FALSE	CRX
224	rs3110797	chr7	135697929	C	T	2	10	12	0.166667	0.558545	0	0.849547	0.991725	0.920636	TRUE	CRX
225	rs3134291	chr8	103413381	C	T	54	26	80	0.675	0.558545	1	0.0139118	0.0304377	0.0221748	TRUE	CRX
226	rs337513	chr12	62858662	A	T	10	12	22	0.454545	0.558545	1	0.00419855	0.0176756	0.0109371	TRUE	CRX
227	rs34056180	chr12	116184035	G	A	116	98	214	0.542056	0.558545	0	0.990111	0.993565	0.991838	TRUE	CRX
228	rs340835	chr1	213990332	G	A	38	26	64	0.59375	0.558545	1	0.00896925	0.0218478	0.0154085	TRUE	CRX
229	rs34324915	chr2	159126695	A	T	26	4	30	0.866667	0.558545	1	0.0193776	0.173865	0.0966212	TRUE	CRX
230	rs343319	chr3	146517607	T	C	14	2	16	0.875	0.558545	1	0.0166326	0.28914	0.152887	TRUE	CRX
231	rs34405151	chr12	27278004	C	T	34	4	38	0.894737	0.558545	1	0.0284366	0.205596	0.117016	TRUE	CRX
232	rs35494592	chr3	32829505	T	C	4	10	14	0.285714	0.558545	1	0.00206769	0.014123	0.00809537	TRUE	CRX
233	rs35508122	chr1	110647392	G	A	18	6	24	0.75	0.558545	0	0.992353	0.998576	0.995464	TRUE	CRX
234	rs35776963	chr2	111947003	G	A	30	20	50	0.6	0.558545	0	0.989148	0.995372	0.99226	TRUE	CRX
235	rs36088452	chr14	69351133	A	G	12	12	24	0.5	0.558545	0.333333	0.508514	0.827623	0.668069	FALSE	CRX
236	rs370630982	chr11	36619626	G	T	18	2	20	0.9	0.558545	1	0.0226929	0.310963	0.166828	TRUE	CRX
237	rs371771434	chr13	67010316	A	C	24	2	26	0.923077	0.558545	1	0.0291985	0.345015	0.187107	TRUE	CRX
238	rs371785972	chrX	154498926	G	A	22	2	24	0.916667	0.558545	1	0.0239112	0.3254	0.174656	TRUE	CRX
239	rs373037541	chr5	88882451	A	C	20	2	22	0.909091	0.558545	1	0.0193595	0.31837	0.168865	TRUE	CRX
240	rs3743589	chr16	11742888	A	T	2	12	14	0.142857	0.558545	1	0.00104399	0.00742187	0.00423293	TRUE	CRX
241	rs375528596	chr18	13514782	A	C	74	2	76	0.973684	0.558545	1	0.0968071	0.544262	0.320534	FALSE	CRX
242	rs3757778	chr7	127816553	C	T	14	6	20	0.7	0.558545	0.5	0.498384	0.858308	0.678346	FALSE	CRX
243	rs3758658	chr11	86955864	T	C	8	8	16	0.5	0.558545	0	0.975922	0.995895	0.985908	TRUE	CRX
244	rs376082864	chr4	5710928	C	A	16	2	18	0.888889	0.558545	1	0.0174158	0.297318	0.157367	TRUE	CRX
245	rs3771044	chr2	205712687	A	G	8	8	16	0.5	0.558545	0	0.975922	0.995895	0.985908	TRUE	CRX
246	rs3787334	chr20	50511483	T	C	6	8	14	0.428571	0.558545	1	0.00174731	0.020924	0.0113356	TRUE	CRX
247	rs3794278	chr12	101645559	C	A	16	4	20	0.8	0.558545	1	0.0130202	0.108397	0.0607087	TRUE	CRX
248	rs3803751	chr17	58572995	A	G	12	4	16	0.75	0.558545	1	0.0117491	0.0921831	0.0519661	TRUE	CRX
249	rs3827189	chr21	36939693	C	T	22	6	28	0.785714	0.558545	1	0.0174572	0.0871983	0.0523278	TRUE	CRX
250	rs3842988	chr1	234743997	C	A	6	16	22	0.272727	0.558545	0.5	0.13641	0.477477	0.306943	FALSE	CRX
251	rs3850997	chr16	11949655	G	T	4	6	10	0.4	0.558545	0	0.948418	0.996457	0.972437	TRUE	CRX
252	rs4074782	chr10	46523324	A	G	8	10	18	0.444444	0.558545	0	0.969902	0.995998	0.98295	TRUE	CRX
253	rs4078003	chr16	7867960	A	T	6	14	20	0.3	0.558545	0	0.941607	0.992184	0.966895	TRUE	CRX
254	rs4105125	chr12	29200970	G	C	12	14	26	0.461538	0.558545	0.6	0.235905	0.564015	0.39996	FALSE	CRX
255	rs41283227	chr22	21921151	C	T	8	2	10	0.8	0.558545	0.5	0.515698	0.936317	0.726008	FALSE	CRX
256	rs41428545	chr19	33303120	C	T	6	18	24	0.25	0.558545	0	0.928967	0.987732	0.958349	TRUE	CRX
257	rs4233371	chr1	161503335	G	C	2	12	14	0.142857	0.558545	0.25	0.170454	0.667037	0.418745	FALSE	CRX
258	rs429598	chr2	71183760	C	T	16	6	22	0.727273	0.558545	0	0.991771	0.998428	0.995099	TRUE	CRX
259	rs4362595	chr2	54471173	T	C	4	6	10	0.4	0.558545	0.5	0.215476	0.701416	0.458446	FALSE	CRX
260	rs4467173	chr18	21833858	G	A	2	14	16	0.125	0.558545	0	0.809544	0.988503	0.899023	TRUE	CRX
261	rs4502554	chr3	111712505	C	T	22	22	44	0.5	0.558545	0	0.985152	0.994179	0.989666	TRUE	CRX
262	rs458655	chr12	118287928	T	G	10	4	14	0.714286	0.558545	0.5	0.456764	0.870878	0.663821	FALSE	CRX
263	rs4738374	chr8	73483804	C	T	8	16	24	0.333333	0.558545	1	0.003086	0.0102243	0.00665513	TRUE	CRX
264	rs4794451	chr17	48107419	A	G	14	6	20	0.7	0.558545	0	0.990327	0.998609	0.994468	TRUE	CRX
265	rs488766	chr11	121119530	A	G	4	10	14	0.285714	0.558545	0.5	0.134473	0.552769	0.343621	FALSE	CRX
266	rs4889841	chr17	80220032	T	C	8	6	14	0.571429	0.558545	0	0.977732	0.996123	0.986927	TRUE	CRX
267	rs4893445	chrX	110007344	G	A	2	20	22	0.0909091	0.558545	0	0.757983	0.976908	0.867445	TRUE	CRX
268	rs4911401	chr20	34066756	C	A	62	38	100	0.62	0.558545	0.5	0.526956	0.706332	0.616644	FALSE	CRX
269	rs4930345	chr11	66204143	A	G	10	12	22	0.454545	0.558545	0	0.971276	0.99365	0.982463	TRUE	CRX
270	rs4930764	chr12	5593279	T	C	12	6	18	0.666667	0.558545	1	0.00939366	0.0499205	0.0296571	TRUE	CRX
271	rs4942830	chr13	49445240	T	A	24	54	78	0.307692	0.558545	0	0.960415	0.98509	0.972753	TRUE	CRX
272	rs4949665	chr1	74952903	T	C	10	4	14	0.714286	0.558545	0.5	0.456764	0.870878	0.663821	FALSE	CRX
273	rs55946986	chr8	37891959	A	G	6	2	8	0.75	0.558545	0.333333	0.583287	0.951938	0.767613	FALSE	CRX
274	rs55979485	chr1	82073968	G	A	20	10	30	0.666667	0.558545	0	0.989905	0.996988	0.993447	TRUE	CRX
275	rs560414	chr1	169959104	T	C	30	28	58	0.517241	0.558545	0	0.985439	0.993812	0.989626	TRUE	CRX
276	rs56110740	chr1	145878094	G	A	12	4	16	0.75	0.558545	1	0.0117491	0.0921831	0.0519661	TRUE	CRX
277	rs56288073	chrX	110002921	T	C	2	12	14	0.142857	0.558545	0	0.825968	0.98797	0.906969	TRUE	CRX
278	rs56387221	chr17	39280894	G	T	2	6	8	0.25	0.558545	0.333333	0.210209	0.75486	0.482535	FALSE	CRX
279	rs56397791	chr1	198174595	C	G	26	4	30	0.866667	0.558545	1	0.0193776	0.173865	0.0966212	TRUE	CRX
280	rs56922253	chr7	151824295	C	T	12	2	14	0.857143	0.558545	0.666667	0.444074	0.910819	0.677446	FALSE	CRX
281	rs57434570	chr6	43149573	G	T	62	2	64	0.96875	0.558545	1	0.0844415	0.512421	0.298431	FALSE	CRX
282	rs5754677	chr22	33797894	T	C	16	4	20	0.8	0.558545	1	0.0130202	0.108397	0.0607087	TRUE	CRX
283	rs58194642	chr8	37637339	C	A	8	2	10	0.8	0.558545	0	0.990316	0.999524	0.99492	TRUE	CRX
284	rs58429683	chr1	225931410	G	T	26	2	28	0.928571	0.558545	1	0.0297644	0.353222	0.191493	TRUE	CRX
285	rs58726213	chr16	31033362	A	G	8	10	18	0.444444	0.558545	0.5	0.257225	0.656926	0.457075	FALSE	CRX
286	rs5937195	chrX	69261298	T	C	8	8	16	0.5	0.558545	1	0.00392061	0.0261986	0.0150596	TRUE	CRX
287	rs5940115	chrX	93289235	A	C	12	12	24	0.5	0.558545	0.5	0.321125	0.666213	0.493669	FALSE	CRX
288	rs59468384	chr15	97076956	G	A	2	14	16	0.125	0.558545	1	0.00107286	0.00690482	0.00398884	TRUE	CRX
289	rs5996712	chr22	24525246	T	C	10	8	18	0.555556	0.558545	1	0.00536394	0.0296241	0.017494	TRUE	CRX
290	rs6002139	chr22	40795053	C	T	8	14	22	0.363636	0.558545	1	0.00283503	0.0122554	0.0075452	TRUE	CRX
291	rs6013018	chr20	50794549	A	G	20	6	26	0.769231	0.558545	1	0.013912	0.0832899	0.0486009	TRUE	CRX
292	rs6015426	chr20	59063760	T	C	10	2	12	0.833333	0.558545	0	0.992093	0.999445	0.995769	TRUE	CRX
293	rs60184908	chr3	29320090	C	G	6	4	10	0.6	0.558545	0	0.9764	0.998129	0.987264	TRUE	CRX
294	rs6033858	chr20	1467025	C	T	10	4	14	0.714286	0.558545	1	0.00884603	0.0790938	0.0439699	TRUE	CRX
295	rs6067168	chr20	49659307	A	G	164	64	228	0.719298	0.558545	0	0.994984	0.996841	0.995913	TRUE	CRX
296	rs60801951	chr4	16141924	A	C	8	2	10	0.8	0.558545	1	0.00847766	0.215253	0.111866	TRUE	CRX
297	rs6088694	chr20	35064568	G	A	10	12	22	0.454545	0.558545	0.5	0.289597	0.652041	0.470819	FALSE	CRX
298	rs6095601	chr20	49659163	T	C	76	26	102	0.745098	0.558545	1	0.0191134	0.0422427	0.030678	TRUE	CRX
299	rs61001248	chr1	229137372	T	C	28	6	34	0.823529	0.558545	1	0.0218723	0.102497	0.0621845	TRUE	CRX
300	rs61063054	chr12	120182347	T	C	38	2	40	0.95	0.558545	1	0.0407352	0.43324	0.236988	FALSE	CRX
301	rs6122779	chr20	49276477	T	C	12	4	16	0.75	0.558545	0	0.990875	0.998839	0.994857	TRUE	CRX
302	rs6142152	chr20	34373071	T	A	2	28	30	0.0666667	0.558545	1	0.000754612	0.00301344	0.00188403	TRUE	CRX
303	rs61452514	chr19	17395815	T	A	16	2	18	0.888889	0.558545	1	0.0174158	0.297318	0.157367	TRUE	CRX
304	rs61762077	chr1	2311682	G	C	14	4	18	0.777778	0.558545	1	0.0114994	0.105415	0.0584572	TRUE	CRX
305	rs61926301	chr12	50764080	G	T	8	2	10	0.8	0.558545	1	0.00847766	0.215253	0.111866	TRUE	CRX
306	rs61957990	chr13	52371868	C	A	10	12	22	0.454545	0.558545	1	0.00419855	0.0176756	0.0109371	TRUE	CRX
307	rs61984851	chr14	54123982	G	A	6	10	16	0.375	0.558545	0.5	0.204388	0.622192	0.41329	FALSE	CRX
308	rs61990776	chr14	79871322	C	T	48	36	84	0.571429	0.558545	1	0.0094764	0.0195509	0.0145137	TRUE	CRX
309	rs61994063	chr14	92687067	G	A	12	12	24	0.5	0.558545	0.5	0.321125	0.666213	0.493669	FALSE	CRX
310	rs62046613	chr16	77594883	C	T	2	12	14	0.142857	0.558545	0	0.825968	0.98797	0.906969	TRUE	CRX
311	rs62133165	chr2	45068208	C	T	8	10	18	0.444444	0.558545	1	0.00321801	0.017647	0.0104325	TRUE	CRX
312	rs62178330	chr2	216692216	T	C	6	12	18	0.333333	0.558545	0	0.94226	0.990568	0.966414	TRUE	CRX
313	rs62232099	chr3	5018437	T	C	6	4	10	0.6	0.558545	0.25	0.59821	0.937305	0.767757	FALSE	CRX
314	rs622687	chr1	63775828	G	A	16	10	26	0.615385	0.558545	0.333333	0.601222	0.880996	0.741109	TRUE	CRX
315	rs62466263	chr7	73522573	G	A	2	8	10	0.2	0.558545	0	0.863869	0.992396	0.928132	TRUE	CRX
316	rs62513189	chr8	128130000	T	C	10	6	16	0.625	0.558545	1	0.00777459	0.0462494	0.027012	TRUE	CRX
317	rs6465339	chr7	91941476	T	A	8	4	12	0.666667	0.558545	0	0.984961	0.998069	0.991515	TRUE	CRX
318	rs6469971	chr8	120960709	C	A	10	28	38	0.263158	0.558545	1	0.00280171	0.0102316	0.00651665	TRUE	CRX
319	rs6539131	chr12	104250919	A	G	6	24	30	0.2	0.558545	0	0.915531	0.986693	0.951112	TRUE	CRX
320	rs6543053	chr2	101435330	G	A	18	2	20	0.9	0.558545	0	0.99737	0.999137	0.998254	TRUE	CRX
321	rs655530	chr12	120584472	T	C	4	4	8	0.5	0.558545	0	0.954009	0.996559	0.975284	TRUE	CRX
322	rs6575521	chr14	95536172	A	G	10	18	28	0.357143	0.558545	0	0.965274	0.992308	0.978791	TRUE	CRX
323	rs6644221	chrX	115294682	G	A	22	2	24	0.916667	0.558545	0	0.997852	0.999641	0.998747	TRUE	CRX
324	rs66496937	chr2	159881998	A	G	16	2	18	0.888889	0.558545	1	0.0174158	0.297318	0.157367	TRUE	CRX
325	rs666637	chr1	229842961	A	G	12	6	18	0.666667	0.558545	1	0.00939366	0.0499205	0.0296571	TRUE	CRX
326	rs6667180	chr1	167553951	T	A	8	6	14	0.571429	0.558545	0.666667	0.202808	0.641612	0.42221	FALSE	CRX
327	rs6667985	chr1	170657379	T	C	16	14	30	0.533333	0.558545	1	0.00580717	0.0223061	0.0140567	TRUE	CRX
328	rs6727086	chr2	72847877	G	C	8	6	14	0.571429	0.558545	0	0.977732	0.996123	0.986927	TRUE	CRX
329	rs6731839	chr2	65573422	G	A	10	10	20	0.5	0.558545	0.666667	0.204321	0.55549	0.379905	FALSE	CRX
330	rs6738830	chr2	44543522	G	C	14	4	18	0.777778	0.558545	1	0.0114994	0.105415	0.0584572	TRUE	CRX
331	rs6786993	chr3	122954118	A	G	16	10	26	0.615385	0.558545	0	0.989011	0.997306	0.993158	TRUE	CRX
332	rs687378	chr17	14500206	G	A	40	20	60	0.666667	0.558545	0.666667	0.381401	0.635389	0.508395	FALSE	CRX
333	rs6874198	chr5	31838385	A	G	20	6	26	0.769231	0.558545	0.5	0.603036	0.899244	0.75114	TRUE	CRX
334	rs6955149	chr7	82382523	G	A	8	6	14	0.571429	0.558545	0	0.977732	0.996123	0.986927	TRUE	CRX
335	rs6986393	chr8	54382307	T	A	2	12	14	0.142857	0.558545	1	0.00104399	0.00742187	0.00423293	TRUE	CRX
336	rs6995988	chr8	38644935	G	A	16	10	26	0.615385	0.558545	0.666667	0.285483	0.635087	0.460285	FALSE	CRX
337	rs7001084	chr8	103214718	A	G	22	28	50	0.44	0.558545	1	0.00455621	0.0125042	0.00853018	TRUE	CRX
338	rs7032	chr12	30709719	T	A	24	6	30	0.8	0.558545	0.5	0.638366	0.908236	0.773301	TRUE	CRX
339	rs7113829	chr11	117019543	C	T	18	10	28	0.642857	0.558545	1	0.00901684	0.038503	0.0237599	TRUE	CRX
340	rs7126737	chr11	115911747	C	T	12	24	36	0.333333	0.558545	0	0.960126	0.990862	0.975494	TRUE	CRX
341	rs7127935	chr11	74675962	T	C	74	90	164	0.45122	0.558545	0	0.983841	0.990754	0.987297	TRUE	CRX
342	rs7135937	chr12	98520837	T	G	10	20	30	0.333333	0.558545	1	0.00242696	0.0123029	0.00736492	TRUE	CRX
343	rs71516784	chr8	125396894	C	T	6	10	16	0.375	0.558545	1	0.00254161	0.0156645	0.00910308	TRUE	CRX
344	rs717915	chr2	199850043	C	T	6	4	10	0.6	0.558545	0	0.9764	0.998129	0.987264	TRUE	CRX
345	rs7181595	chr15	75738667	C	T	12	4	16	0.75	0.558545	1	0.0117491	0.0921831	0.0519661	TRUE	CRX
346	rs7209460	chr17	2145419	C	T	8	6	14	0.571429	0.558545	0	0.977732	0.996123	0.986927	TRUE	CRX
347	rs7210150	chr17	80565794	T	A	14	12	26	0.538462	0.558545	0.666667	0.237327	0.559663	0.398495	FALSE	CRX
348	rs721059	chr20	2544281	T	C	8	18	26	0.307692	0.558545	0.333333	0.314984	0.671961	0.493473	FALSE	CRX
349	rs7211535	chr17	20019051	A	G	20	2	22	0.909091	0.558545	1	0.0193595	0.31837	0.168865	TRUE	CRX
350	rs7219163	chr17	29883685	A	C	8	6	14	0.571429	0.558545	0	0.977732	0.996123	0.986927	TRUE	CRX
351	rs7248155	chr19	32742384	T	C	16	2	18	0.888889	0.558545	1	0.0174158	0.297318	0.157367	TRUE	CRX
352	rs72629008	chr20	59790581	G	A	20	2	22	0.909091	0.558545	1	0.0193595	0.31837	0.168865	TRUE	CRX
353	rs72785870	chr2	30156496	A	G	18	12	30	0.6	0.558545	1	0.00800817	0.0281831	0.0180956	TRUE	CRX
354	rs72854780	chr3	33031065	C	T	44	2	46	0.956522	0.558545	1	0.0564275	0.461888	0.259158	FALSE	CRX
355	rs7299842	chr12	122054407	G	A	4	6	10	0.4	0.558545	1	0.00241544	0.029922	0.0161687	TRUE	CRX
356	rs73002351	chr11	112967397	C	T	14	10	24	0.583333	0.558545	0.333333	0.57846	0.874155	0.726308	FALSE	CRX
357	rs73007510	chr19	10696023	C	T	8	18	26	0.307692	0.558545	1	0.00260667	0.0101771	0.00639189	TRUE	CRX
358	rs73039245	chr7	2157810	T	C	30	14	44	0.681818	0.558545	0	0.99233	0.997281	0.994805	TRUE	CRX
359	rs7307261	chr12	7970710	G	A	12	2	14	0.857143	0.558545	1	0.0110804	0.254686	0.132883	TRUE	CRX
360	rs7307815	chr12	50528927	A	C	16	46	62	0.258065	0.558545	0.2	0.455278	0.716113	0.585695	FALSE	CRX
361	rs73085176	chr12	25365273	T	C	28	80	108	0.259259	0.558545	1	0.00310672	0.00536555	0.00423614	TRUE	CRX
362	rs7308961	chr12	52210667	A	G	14	4	18	0.777778	0.558545	0	0.992975	0.999208	0.996092	TRUE	CRX
363	rs73090789	chr12	32897240	G	A	12	6	18	0.666667	0.558545	1	0.00939366	0.0499205	0.0296571	TRUE	CRX
364	rs7314434	chr12	50518488	C	T	6	8	14	0.428571	0.558545	0	0.963958	0.996319	0.980139	TRUE	CRX
365	rs7315852	chr12	308467	A	G	4	16	20	0.2	0.558545	1	0.00119735	0.00615913	0.00367824	TRUE	CRX
366	rs73216891	chr12	93407500	G	A	6	14	20	0.3	0.558545	0	0.941607	0.992184	0.966895	TRUE	CRX
367	rs7339411	chr13	39145157	T	C	18	8	26	0.692308	0.558545	0.666667	0.355363	0.710614	0.532988	FALSE	CRX
368	rs734269	chr2	47038021	C	T	10	8	18	0.555556	0.558545	1	0.00536394	0.0296241	0.017494	TRUE	CRX
369	rs73503412	chr19	12776218	G	T	12	6	18	0.666667	0.558545	0	0.986461	0.996753	0.991607	TRUE	CRX
370	rs73691586	chr8	66775089	T	C	4	10	14	0.285714	0.558545	0	0.927424	0.994914	0.961169	TRUE	CRX
371	rs73925005	chr19	14574455	G	A	16	12	28	0.571429	0.558545	0.5	0.406435	0.737581	0.572008	FALSE	CRX
372	rs74026913	chr15	77440741	A	G	4	10	14	0.285714	0.558545	0	0.927424	0.994914	0.961169	TRUE	CRX
373	rs7404540	chr16	30412557	C	T	6	8	14	0.428571	0.558545	0	0.963958	0.996319	0.980139	TRUE	CRX
374	rs7405646	chr17	81584038	A	G	8	20	28	0.285714	0.558545	0.666667	0.0904615	0.306816	0.198639	TRUE	CRX
375	rs75110883	chr2	201932721	G	A	40	32	72	0.555556	0.558545	0.5	0.458904	0.675742	0.567323	FALSE	CRX
376	rs7513903	chr1	94785386	T	C	4	14	18	0.222222	0.558545	0.5	0.124567	0.480034	0.3023	FALSE	CRX
377	rs75240846	chr17	44821111	G	C	8	18	26	0.307692	0.558545	0	0.948789	0.991045	0.969917	TRUE	CRX
378	rs75342462	chr3	61561490	C	T	10	6	16	0.625	0.558545	0.5	0.403257	0.798046	0.600652	FALSE	CRX
379	rs75361607	chr1	232857069	A	G	14	6	20	0.7	0.558545	1	0.0100646	0.0603517	0.0352081	TRUE	CRX
380	rs7540534	chr1	209871479	A	T	8	6	14	0.571429	0.558545	0	0.977732	0.996123	0.986927	TRUE	CRX
381	rs7541261	chr1	86992160	T	C	10	6	16	0.625	0.558545	1	0.00777459	0.0462494	0.027012	TRUE	CRX
382	rs7579665	chr2	85515493	A	C	4	12	16	0.25	0.558545	0	0.91351	0.99356	0.953535	TRUE	CRX
383	rs75851226	chr1	169894024	A	C	24	8	32	0.75	0.558545	0.666667	0.419078	0.761249	0.590163	FALSE	CRX
384	rs7590375	chr2	113703800	T	C	4	14	18	0.222222	0.558545	1	0.001647	0.00890693	0.00527697	TRUE	CRX
385	rs76224134	chr19	1172640	G	T	4	16	20	0.2	0.558545	1	0.00119735	0.00615913	0.00367824	TRUE	CRX
386	rs76254199	chr2	101141162	C	T	10	10	20	0.5	0.558545	0	0.976553	0.996984	0.986769	TRUE	CRX
387	rs764686	chr2	134087514	T	C	4	38	42	0.0952381	0.558545	0	0.809005	0.966678	0.887842	TRUE	CRX
388	rs767762	chr1	9802314	C	T	18	18	36	0.5	0.558545	0	0.97974	0.994358	0.987049	TRUE	CRX
389	rs76938490	chr21	17451326	G	A	18	12	30	0.6	0.558545	0.5	0.443271	0.763347	0.603309	FALSE	CRX
390	rs772556	chr12	62910667	C	T	70	48	118	0.59322	0.558545	0.5	0.512458	0.677255	0.594856	FALSE	CRX
391	rs77353560	chr2	27862677	C	A	2	16	18	0.111111	0.558545	0	0.794518	0.987642	0.89108	TRUE	CRX
392	rs77685968	chr15	34799788	G	A	6	10	16	0.375	0.558545	0	0.956399	0.995622	0.97601	TRUE	CRX
393	rs77933991	chr13	78611264	T	A	32	70	102	0.313725	0.558545	0.333333	0.386443	0.58506	0.485752	FALSE	CRX
394	rs78362693	chr3	169556193	T	G	4	12	16	0.25	0.558545	1	0.00134613	0.0105032	0.00592465	TRUE	CRX
395	rs7840346	chr8	33345609	C	G	8	12	20	0.4	0.558545	1	0.00369952	0.0167096	0.0102046	TRUE	CRX
396	rs78642468	chr2	27296007	G	T	16	2	18	0.888889	0.558545	1	0.0174158	0.297318	0.157367	TRUE	CRX
397	rs79047981	chr6	57016700	C	A	124	2	126	0.984127	0.558545	1	0.159219	0.652124	0.405671	FALSE	CRX
398	rs79170781	chr19	35628648	G	A	2	22	24	0.0833333	0.558545	0.333333	0.0879443	0.439486	0.263715	FALSE	CRX
399	rs79275758	chr11	129215671	T	C	26	22	48	0.541667	0.558545	0	0.986455	0.994767	0.990611	TRUE	CRX
400	rs79286679	chr2	217316998	T	C	4	10	14	0.285714	0.558545	0	0.927424	0.994914	0.961169	TRUE	CRX
401	rs79336031	chr17	50762401	G	C	12	16	28	0.428571	0.558545	1	0.00381962	0.0152686	0.0095441	TRUE	CRX
402	rs79424432	chr15	84570509	C	G	10	4	14	0.714286	0.558545	1	0.00884603	0.0790938	0.0439699	TRUE	CRX
403	rs79540325	chr1	42393787	T	A	10	20	30	0.333333	0.558545	0.333333	0.336821	0.680453	0.508637	FALSE	CRX
404	rs7957667	chr12	51273121	A	C	6	8	14	0.428571	0.558545	0	0.963958	0.996319	0.980139	TRUE	CRX
405	rs7984127	chr13	48177055	T	C	10	4	14	0.714286	0.558545	0.5	0.456764	0.870878	0.663821	FALSE	CRX
406	rs80079695	chr19	41314647	C	G	6	20	26	0.230769	0.558545	0	0.930277	0.986698	0.958487	TRUE	CRX
407	rs80157892	chr7	78473306	T	C	4	4	8	0.5	0.558545	1	0.00254167	0.0420938	0.0223177	TRUE	CRX
408	rs8031196	chr15	80702590	C	T	12	6	18	0.666667	0.558545	1	0.00939366	0.0499205	0.0296571	TRUE	CRX
409	rs8035526	chr15	77390905	T	G	10	14	24	0.416667	0.558545	0	0.967536	0.992911	0.980223	TRUE	CRX
410	rs8101033	chr19	32873028	C	T	28	2	30	0.933333	0.558545	1	0.0243075	0.367817	0.196062	TRUE	CRX
411	rs8128620	chr21	39308244	G	C	34	2	36	0.944444	0.558545	1	0.0366067	0.410095	0.223351	FALSE	CRX
412	rs8141959	chr22	19150436	C	G	4	6	10	0.4	0.558545	1	0.00241544	0.029922	0.0161687	TRUE	CRX
413	rs861591	chr1	184770356	T	A	50	64	114	0.438596	0.558545	0	0.982315	0.990627	0.986471	TRUE	CRX
414	rs863501	chr16	4538393	G	C	4	6	10	0.4	0.558545	0	0.948418	0.996457	0.972437	TRUE	CRX
415	rs8713	chr7	116559743	A	C	6	28	34	0.176471	0.558545	0.5	0.102001	0.344884	0.223443	TRUE	CRX
416	rs879142	chr19	17511582	A	G	8	2	10	0.8	0.558545	1	0.00847766	0.215253	0.111866	TRUE	CRX
417	rs911263	chr14	68286876	C	T	2	16	18	0.111111	0.558545	0	0.794518	0.987642	0.89108	TRUE	CRX
418	rs916332	chr22	28912426	C	T	16	10	26	0.615385	0.558545	0	0.989011	0.997306	0.993158	TRUE	CRX
419	rs919655	chr1	213984629	G	A	10	8	18	0.555556	0.558545	1	0.00536394	0.0296241	0.017494	TRUE	CRX
420	rs9300565	chr13	99791211	C	G	14	14	28	0.5	0.558545	0.666667	0.206693	0.513025	0.359859	FALSE	CRX
421	rs9303642	chr17	31251342	T	C	12	34	46	0.26087	0.558545	1	0.00260102	0.0068177	0.00470936	TRUE	CRX
422	rs930392	chr16	30183519	A	G	4	8	12	0.333333	0.558545	1	0.00333452	0.0155729	0.0094537	TRUE	CRX
423	rs9316136	chr13	45396638	T	C	10	2	12	0.833333	0.558545	0	0.992093	0.999445	0.995769	TRUE	CRX
424	rs9435144	chr1	9235385	T	C	4	14	18	0.222222	0.558545	1	0.001647	0.00890693	0.00527697	TRUE	CRX
425	rs9531753	chr13	36296765	T	C	8	24	32	0.25	0.558545	0.5	0.144885	0.431107	0.287996	FALSE	CRX
426	rs9532988	chr13	42075570	A	G	16	2	18	0.888889	0.558545	0	0.994867	0.999196	0.997032	TRUE	CRX
427	rs9562368	chr13	41998513	G	A	4	16	20	0.2	0.558545	1	0.00119735	0.00615913	0.00367824	TRUE	CRX
428	rs9575871	chr13	36299064	C	A	6	22	28	0.214286	0.558545	0.333333	0.22146	0.577876	0.399668	FALSE	CRX
429	rs9610581	chr22	21901760	A	G	22	8	30	0.733333	0.558545	1	0.0144828	0.0584592	0.036471	TRUE	CRX
430	rs9611613	chr22	41565827	T	C	2	4	6	0.333333	0.558545	0	0.896329	0.996078	0.946203	TRUE	CRX
431	rs9639903	chr7	44910199	C	T	6	4	10	0.6	0.558545	1	0.00450509	0.0704041	0.0374546	TRUE	CRX
432	rs9820194	chr3	15072012	C	T	10	16	26	0.384615	0.558545	0.5	0.246429	0.582606	0.414518	FALSE	CRX
433	rs9820526	chr3	24199483	G	A	4	16	20	0.2	0.558545	0	0.902989	0.989289	0.946139	TRUE	CRX
434	rs9825011	chr3	10945905	T	C	6	12	18	0.333333	0.558545	0	0.94226	0.990568	0.966414	TRUE	CRX
435	rs9874866	chr3	156820881	A	G	16	2	18	0.888889	0.558545	0	0.994867	0.999196	0.997032	TRUE	CRX
436	rs9888179	chr11	12761054	G	T	4	6	10	0.4	0.558545	1	0.00241544	0.029922	0.0161687	TRUE	CRX
437	rs9929584	chr16	69455673	T	C	2	16	18	0.111111	0.558545	0.333333	0.100162	0.516339	0.30825	FALSE	CRX
438	rs9955626	chr18	47888550	G	A	12	2	14	0.857143	0.558545	1	0.0110804	0.254686	0.132883	TRUE	CRX
439	rs9976900	chr21	35012066	G	T	16	4	20	0.8	0.558545	1	0.0130202	0.108397	0.0607087	TRUE	CRX
440	rs9982175	chr21	41702316	T	C	32	4	36	0.888889	0.558545	1	0.0264935	0.193864	0.110179	TRUE	CRX
1	rs10226230	chr7	38229691	A	G	4	2	6	0.666667	0.528376	0	0.968869	0.998152	0.98351	TRUE	DLX3
2	rs1401117	chr2	140441433	C	T	4	14	18	0.222222	0.528376	1	0.00165081	0.00775059	0.0047007	TRUE	DLX3
1	rs1001179	chr11	34438684	C	T	20	2	22	0.909091	0.564591	1	0.0273997	0.322002	0.174701	TRUE	DPRX
2	rs10042852	chr5	43716344	C	G	8	2	10	0.8	0.564591	0	0.990316	0.999524	0.99492	TRUE	DPRX
3	rs10071514	chr5	173242768	A	G	10	2	12	0.833333	0.564591	1	0.011903	0.23797	0.124936	TRUE	DPRX
4	rs10098343	chr8	60185119	T	C	8	8	16	0.5	0.564591	0.5	0.313917	0.724188	0.519052	FALSE	DPRX
5	rs10142497	chr14	55581230	T	C	14	2	16	0.875	0.564591	1	0.0203597	0.293559	0.15696	TRUE	DPRX
6	rs10146759	chr14	24429988	C	T	8	2	10	0.8	0.564591	0.333333	0.683383	0.982936	0.833159	TRUE	DPRX
7	rs10176214	chr2	24919937	T	G	6	4	10	0.6	0.564591	0	0.9764	0.998129	0.987264	TRUE	DPRX
8	rs10184871	chr2	237627749	T	G	2	4	6	0.333333	0.564591	0.666667	0.0782821	0.550346	0.314314	FALSE	DPRX
9	rs10202094	chr2	128274016	C	T	8	2	10	0.8	0.564591	0	0.990316	0.999524	0.99492	TRUE	DPRX
10	rs10204724	chr2	29398763	A	G	6	4	10	0.6	0.564591	0	0.9764	0.998129	0.987264	TRUE	DPRX
11	rs10225507	chr7	27130964	C	T	32	24	56	0.571429	0.564591	0.5	0.445812	0.695156	0.570484	FALSE	DPRX
12	rs10272990	chr7	1664039	T	C	4	6	10	0.4	0.564591	1	0.00358953	0.0264676	0.0150285	TRUE	DPRX
13	rs10402774	chr19	3577376	C	G	16	4	20	0.8	0.564591	0	0.993531	0.998948	0.99624	TRUE	DPRX
14	rs10417381	chr19	3036352	T	C	10	14	24	0.416667	0.564591	1	0.00413501	0.0160797	0.0101074	TRUE	DPRX
15	rs10426423	chr19	44844996	C	T	14	16	30	0.466667	0.564591	0.5	0.327883	0.643334	0.485608	FALSE	DPRX
16	rs1047616	chr17	27315496	G	A	14	8	22	0.636364	0.564591	0.5	0.454698	0.811158	0.632928	FALSE	DPRX
17	rs1051750	chr14	102777609	C	T	2	4	6	0.333333	0.564591	0	0.899723	0.997988	0.948856	TRUE	DPRX
18	rs1056619	chr17	45132360	C	T	20	8	28	0.714286	0.564591	0.6	0.45416	0.787714	0.620937	FALSE	DPRX
19	rs1066390	chr12	67322773	C	T	2	18	20	0.1	0.564591	0	0.781036	0.984215	0.882625	TRUE	DPRX
20	rs10773828	chr12	130838897	C	T	10	8	18	0.555556	0.564591	0.333333	0.538298	0.868772	0.703535	FALSE	DPRX
21	rs10774481	chr12	991471	G	C	12	6	18	0.666667	0.564591	0.75	0.191459	0.615694	0.403577	FALSE	DPRX
22	rs1079455	chr18	1062471	T	A	8	4	12	0.666667	0.564591	1	0.00742796	0.0716062	0.0395171	TRUE	DPRX
23	rs10800284	chr1	167106241	C	T	24	6	30	0.8	0.564591	1	0.016419	0.0882415	0.0523303	TRUE	DPRX
24	rs10819783	chr9	100474037	C	A	2	8	10	0.2	0.564591	0	0.863046	0.993228	0.928137	TRUE	DPRX
25	rs10849558	chr12	804630	C	A	16	6	22	0.727273	0.564591	1	0.0119387	0.0728314	0.042385	TRUE	DPRX
26	rs10870133	chr9	136866465	A	G	22	2	24	0.916667	0.564591	1	0.0300701	0.334179	0.182124	TRUE	DPRX
27	rs10911205	chr1	183040142	C	A	22	2	24	0.916667	0.564591	1	0.0300701	0.334179	0.182124	TRUE	DPRX
28	rs10915962	chr1	226223616	C	T	4	14	18	0.222222	0.564591	0	0.913224	0.990741	0.951983	TRUE	DPRX
29	rs10917049	chr1	21809459	C	T	2	6	8	0.25	0.564591	0	0.880369	0.992573	0.936471	TRUE	DPRX
30	rs10958707	chr8	42140176	C	T	12	22	34	0.352941	0.564591	0.333333	0.38011	0.70007	0.54009	FALSE	DPRX
31	rs11043076	chr11	2202244	C	T	4	6	10	0.4	0.564591	0	0.945527	0.994127	0.969827	TRUE	DPRX
32	rs11048709	chr12	26832960	G	A	18	8	26	0.692308	0.564591	0.666667	0.354577	0.717482	0.536029	FALSE	DPRX
33	rs11055128	chr12	12885695	C	T	10	2	12	0.833333	0.564591	1	0.011903	0.23797	0.124936	TRUE	DPRX
34	rs11057297	chr12	123570543	C	T	4	16	20	0.2	0.564591	0	0.900472	0.99014	0.945306	TRUE	DPRX
35	rs11057888	chr12	124898583	C	A	22	2	24	0.916667	0.564591	1	0.0300701	0.334179	0.182124	TRUE	DPRX
36	rs11083461	chr19	38453352	T	C	10	10	20	0.5	0.564591	0.333333	0.468462	0.818771	0.643617	FALSE	DPRX
37	rs11083857	chr19	47046196	C	T	8	4	12	0.666667	0.564591	1	0.00742796	0.0716062	0.0395171	TRUE	DPRX
38	rs1109838	chr16	89828204	C	A	10	6	16	0.625	0.564591	0.75	0.170189	0.590145	0.380167	FALSE	DPRX
39	rs11108265	chr12	95790324	G	A	12	4	16	0.75	0.564591	0.5	0.535487	0.902051	0.718769	FALSE	DPRX
40	rs11118589	chr1	220671361	C	T	10	2	12	0.833333	0.564591	0.5	0.561301	0.948856	0.755078	FALSE	DPRX
41	rs111308825	chr19	33622079	G	A	28	12	40	0.7	0.564591	0.777778	0.26353	0.571606	0.417568	FALSE	DPRX
42	rs111344771	chr1	111990024	G	A	4	10	14	0.285714	0.564591	0	0.927573	0.993079	0.960326	TRUE	DPRX
43	rs11170672	chr12	53739847	A	G	30	8	38	0.789474	0.564591	0.8	0.323479	0.668415	0.495947	FALSE	DPRX
44	rs111771036	chr2	174487082	A	G	12	2	14	0.857143	0.564591	1	0.0154119	0.27594	0.145676	TRUE	DPRX
45	rs112034678	chr15	99814029	C	G	14	2	16	0.875	0.564591	0	0.994867	0.999196	0.997032	TRUE	DPRX
46	rs112299555	chr1	43650520	C	T	10	22	32	0.3125	0.564591	0.5	0.195325	0.492764	0.344045	FALSE	DPRX
47	rs112502960	chr17	49361940	G	A	10	4	14	0.714286	0.564591	0	0.988194	0.998918	0.993556	TRUE	DPRX
48	rs112587865	chr7	975635	C	A	10	6	16	0.625	0.564591	0.5	0.41123	0.811142	0.611186	FALSE	DPRX
49	rs112656571	chr1	118592717	A	G	2	8	10	0.2	0.564591	0	0.863046	0.993228	0.928137	TRUE	DPRX
50	rs112997568	chr2	23940563	G	A	4	6	10	0.4	0.564591	0.5	0.207749	0.702011	0.45488	FALSE	DPRX
51	rs113304510	chr16	2026930	C	G	6	8	14	0.428571	0.564591	1	0.00489309	0.0238058	0.0143494	TRUE	DPRX
52	rs113340201	chr2	229921973	G	C	8	4	12	0.666667	0.564591	1	0.00742796	0.0716062	0.0395171	TRUE	DPRX
53	rs113368091	chr12	51590852	C	A	12	16	28	0.428571	0.564591	0	0.975467	0.994728	0.985097	TRUE	DPRX
54	rs113485822	chr16	30699108	T	G	22	2	24	0.916667	0.564591	1	0.0300701	0.334179	0.182124	TRUE	DPRX
55	rs113708270	chr20	5001472	T	G	4	8	12	0.333333	0.564591	0.5	0.160486	0.618061	0.389274	FALSE	DPRX
56	rs1139829	chr2	98608705	C	T	4	8	12	0.333333	0.564591	0.666667	0.0872755	0.465734	0.276505	FALSE	DPRX
57	rs114533243	chr16	25022562	T	C	2	4	6	0.333333	0.564591	1	0.00243978	0.0293341	0.0158869	TRUE	DPRX
58	rs114693875	chr2	199458729	A	G	12	8	20	0.6	0.564591	0	0.984155	0.996843	0.990499	TRUE	DPRX
59	rs114982608	chr1	941767	G	A	10	16	26	0.384615	0.564591	0.714286	0.11669	0.355508	0.236099	TRUE	DPRX
60	rs115098832	chr3	194134863	C	A	26	2	28	0.928571	0.564591	1	0.0295268	0.363103	0.196315	TRUE	DPRX
61	rs11537648	chr12	96400338	T	A	18	2	20	0.9	0.564591	1	0.0228147	0.31004	0.166427	TRUE	DPRX
62	rs115392921	chr11	8964369	G	A	16	2	18	0.888889	0.564591	1	0.0228467	0.301554	0.1622	TRUE	DPRX
63	rs11549412	chr1	150974780	C	G	6	4	10	0.6	0.564591	0.75	0.153889	0.6142	0.384044	FALSE	DPRX
64	rs11555541	chr15	78149427	T	C	24	4	28	0.857143	0.564591	0.875	0.233953	0.670833	0.452393	FALSE	DPRX
65	rs115731330	chr20	50790785	G	A	22	6	28	0.785714	0.564591	1	0.0165972	0.0840421	0.0503196	TRUE	DPRX
66	rs115746499	chr1	42335242	C	T	6	14	20	0.3	0.564591	0.875	0.035093	0.151107	0.0931	TRUE	DPRX
67	rs11584354	chr1	150066990	G	A	12	10	22	0.545455	0.564591	0.5	0.373365	0.73294	0.553152	FALSE	DPRX
68	rs116101137	chr2	231038211	C	A	8	8	16	0.5	0.564591	0.5	0.313917	0.724188	0.519052	FALSE	DPRX
69	rs116148205	chr21	46327934	G	C	14	2	16	0.875	0.564591	1	0.0203597	0.293559	0.15696	TRUE	DPRX
70	rs11615019	chr12	69738929	A	G	10	14	24	0.416667	0.564591	0.5	0.265128	0.622137	0.443632	FALSE	DPRX
71	rs11641520	chr16	11871533	C	G	10	2	12	0.833333	0.564591	1	0.011903	0.23797	0.124936	TRUE	DPRX
72	rs11651657	chr17	57851976	A	G	8	18	26	0.307692	0.564591	0.4	0.24651	0.609892	0.428201	FALSE	DPRX
73	rs116527098	chr3	46878732	C	T	8	2	10	0.8	0.564591	1	0.0113642	0.216439	0.113901	TRUE	DPRX
74	rs11666329	chr19	44851039	A	G	18	4	22	0.818182	0.564591	0.333333	0.761118	0.954069	0.857593	TRUE	DPRX
75	rs11666480	chr19	1856555	C	G	6	6	12	0.5	0.564591	0.5	0.29663	0.750453	0.523541	FALSE	DPRX
76	rs116890232	chr19	3650210	G	A	12	2	14	0.857143	0.564591	0	0.994719	0.99959	0.997154	TRUE	DPRX
77	rs116893322	chr15	84981397	G	A	10	36	46	0.217391	0.564591	0.333333	0.238021	0.531442	0.384732	FALSE	DPRX
78	rs11700586	chr21	44709068	C	G	12	2	14	0.857143	0.564591	1	0.0154119	0.27594	0.145676	TRUE	DPRX
79	rs117008272	chr13	35478535	C	G	4	12	16	0.25	0.564591	0.2	0.381157	0.81037	0.595764	FALSE	DPRX
80	rs117009988	chr19	18636238	G	A	26	16	42	0.619048	0.564591	0.666667	0.315241	0.599914	0.457578	FALSE	DPRX
81	rs117117014	chr19	3028574	C	T	6	4	10	0.6	0.564591	1	0.0033133	0.0647875	0.0340504	TRUE	DPRX
82	rs117388367	chr12	31749569	C	T	30	4	34	0.882353	0.564591	1	0.0231433	0.191835	0.107489	TRUE	DPRX
83	rs117615927	chr1	233904798	G	A	16	6	22	0.727273	0.564591	1	0.0119387	0.0728314	0.042385	TRUE	DPRX
84	rs11766297	chr7	149624414	G	C	10	12	22	0.454545	0.564591	0	0.971276	0.99365	0.982463	TRUE	DPRX
85	rs11766862	chr7	47328220	A	G	6	10	16	0.375	0.564591	0.333333	0.358481	0.772602	0.565542	FALSE	DPRX
86	rs11768941	chr7	101822852	G	T	38	2	40	0.95	0.564591	1	0.033879	0.421321	0.2276	FALSE	DPRX
87	rs117732782	chr18	48951650	C	T	4	22	26	0.153846	0.564591	0	0.872708	0.978299	0.925504	TRUE	DPRX
88	rs117990130	chr16	89720932	C	T	4	24	28	0.142857	0.564591	0.75	0.0258738	0.14627	0.0860717	TRUE	DPRX
89	rs117991761	chr16	88941580	A	G	2	2	4	0.5	0.564591	0	0.929143	0.99849	0.963816	TRUE	DPRX
90	rs11800757	chr1	236495490	G	C	8	6	14	0.571429	0.564591	0.5	0.356546	0.78861	0.572578	FALSE	DPRX
91	rs118151917	chr16	30901874	G	C	10	8	18	0.555556	0.564591	0.333333	0.538298	0.868772	0.703535	FALSE	DPRX
92	rs11865749	chr16	667971	C	G	18	6	24	0.75	0.564591	0.25	0.799449	0.954462	0.876955	TRUE	DPRX
93	rs11868888	chr17	19004876	A	G	6	16	22	0.272727	0.564591	1	0.00229803	0.00956165	0.00592984	TRUE	DPRX
94	rs11908486	chr20	37349700	G	T	8	4	12	0.666667	0.564591	0.333333	0.585384	0.921718	0.753551	FALSE	DPRX
95	rs12096239	chr1	26470431	G	C	24	2	26	0.923077	0.564591	0.6	0.680838	0.962016	0.821427	TRUE	DPRX
96	rs12121737	chr1	203872458	T	A	4	8	12	0.333333	0.564591	0	0.939666	0.99269	0.966178	TRUE	DPRX
97	rs1217398	chr1	113905154	C	G	16	10	26	0.615385	0.564591	0.75	0.212932	0.541348	0.37714	FALSE	DPRX
98	rs12185577	chr2	65432354	A	G	4	2	6	0.666667	0.564591	1	0.00371333	0.140923	0.072318	TRUE	DPRX
99	rs12306	chr17	27295085	G	T	10	10	20	0.5	0.564591	1	0.00363654	0.0210327	0.0123346	TRUE	DPRX
100	rs12325614	chr16	10577821	G	A	6	8	14	0.428571	0.564591	0.333333	0.395903	0.807385	0.601644	FALSE	DPRX
101	rs12326928	chr18	48983208	G	T	2	16	18	0.111111	0.564591	0	0.802237	0.984132	0.893184	TRUE	DPRX
102	rs12412089	chr10	113579135	T	G	16	4	20	0.8	0.564591	1	0.0134509	0.117673	0.0655621	TRUE	DPRX
103	rs1241231	chr12	116508502	G	C	10	6	16	0.625	0.564591	1	0.0089604	0.0450738	0.0270171	TRUE	DPRX
104	rs12422933	chr12	114668883	C	A	18	2	20	0.9	0.564591	0	0.99737	0.999137	0.998254	TRUE	DPRX
105	rs12427430	chr13	110306600	G	T	20	2	22	0.909091	0.564591	1	0.0273997	0.322002	0.174701	TRUE	DPRX
106	rs12460421	chr19	10870676	A	G	18	2	20	0.9	0.564591	1	0.0228147	0.31004	0.166427	TRUE	DPRX
107	rs12532824	chr7	151126422	G	A	10	6	16	0.625	0.564591	1	0.0089604	0.0450738	0.0270171	TRUE	DPRX
108	rs12561771	chr1	15400852	A	G	12	6	18	0.666667	0.564591	1	0.00777341	0.0493942	0.0285838	TRUE	DPRX
109	rs12630379	chr3	128651361	G	C	4	6	10	0.4	0.564591	0	0.945527	0.994127	0.969827	TRUE	DPRX
110	rs12716973	chr16	29926331	G	A	12	16	28	0.428571	0.564591	0.857143	0.0534028	0.207037	0.13022	TRUE	DPRX
111	rs12725425	chr1	69949478	C	T	8	6	14	0.571429	0.564591	1	0.00556437	0.0399149	0.0227397	TRUE	DPRX
112	rs12742403	chr1	242524418	G	C	12	8	20	0.6	0.564591	0.5	0.397154	0.773466	0.58531	FALSE	DPRX
113	rs12743373	chr1	179385787	A	G	6	8	14	0.428571	0.564591	0.5	0.237878	0.68091	0.459394	FALSE	DPRX
114	rs12811124	chr12	96087582	G	A	12	2	14	0.857143	0.564591	0	0.994719	0.99959	0.997154	TRUE	DPRX
115	rs12879923	chr14	69152609	T	G	22	2	24	0.916667	0.564591	1	0.0300701	0.334179	0.182124	TRUE	DPRX
116	rs12924722	chr16	86523387	G	C	4	4	8	0.5	0.564591	0	0.954372	0.996979	0.975676	TRUE	DPRX
117	rs12959962	chr18	23121211	A	G	6	2	8	0.75	0.564591	1	0.00559834	0.181312	0.0934552	TRUE	DPRX
118	rs12985118	chr19	5338964	T	C	6	2	8	0.75	0.564591	0.333333	0.609734	0.967369	0.788552	TRUE	DPRX
119	rs12985789	chr19	47422198	C	T	2	16	18	0.111111	0.564591	0	0.802237	0.984132	0.893184	TRUE	DPRX
120	rs13019004	chr2	191245493	C	T	20	2	22	0.909091	0.564591	1	0.0273997	0.322002	0.174701	TRUE	DPRX
121	rs13027420	chr2	38396298	G	C	12	4	16	0.75	0.564591	1	0.00779981	0.0934326	0.0506162	TRUE	DPRX
122	rs13057671	chr22	45240603	C	A	12	2	14	0.857143	0.564591	1	0.0154119	0.27594	0.145676	TRUE	DPRX
123	rs13087645	chr3	185884140	A	G	4	2	6	0.666667	0.564591	0	0.972824	0.998891	0.985857	TRUE	DPRX
124	rs13250962	chr8	28505643	G	A	8	8	16	0.5	0.564591	0.5	0.313917	0.724188	0.519052	FALSE	DPRX
125	rs13251285	chr8	24921924	G	T	4	2	6	0.666667	0.564591	0	0.972824	0.998891	0.985857	TRUE	DPRX
126	rs13395300	chr2	17877595	A	G	10	4	14	0.714286	0.564591	0	0.988194	0.998918	0.993556	TRUE	DPRX
127	rs13410373	chr2	104860578	T	C	2	10	12	0.166667	0.564591	0	0.855947	0.988594	0.922271	TRUE	DPRX
128	rs1374385	chr2	238241004	C	G	4	12	16	0.25	0.564591	0	0.913836	0.99316	0.953498	TRUE	DPRX
129	rs138072	chr22	43838203	A	G	6	10	16	0.375	0.564591	1	0.00254161	0.0156645	0.00910308	TRUE	DPRX
130	rs138096908	chr1	2272437	A	T	14	2	16	0.875	0.564591	1	0.0203597	0.293559	0.15696	TRUE	DPRX
131	rs1383116	chr12	26125146	C	A	24	8	32	0.75	0.564591	1	0.0144079	0.0621294	0.0382686	TRUE	DPRX
132	rs138394	chr22	38412762	C	G	2	10	12	0.166667	0.564591	0	0.855947	0.988594	0.922271	TRUE	DPRX
133	rs139962835	chr20	8132482	C	A	12	4	16	0.75	0.564591	1	0.00779981	0.0934326	0.0506162	TRUE	DPRX
134	rs140123156	chr10	93719662	A	T	12	2	14	0.857143	0.564591	1	0.0154119	0.27594	0.145676	TRUE	DPRX
135	rs1406815	chr16	728158	C	G	6	8	14	0.428571	0.564591	0.571429	0.189131	0.615697	0.402414	FALSE	DPRX
136	rs141300809	chr10	21497372	G	C	32	2	34	0.941176	0.564591	1	0.0408113	0.3825	0.211656	TRUE	DPRX
137	rs141373280	chr15	84750808	C	A	22	2	24	0.916667	0.564591	1	0.0300701	0.334179	0.182124	TRUE	DPRX
138	rs142002099	chr7	159157825	G	T	10	4	14	0.714286	0.564591	1	0.0103903	0.0828199	0.0466051	TRUE	DPRX
139	rs142728885	chrX	129931057	T	C	28	2	30	0.933333	0.564591	1	0.032958	0.370162	0.20156	TRUE	DPRX
140	rs143874608	chr8	125430107	G	A	6	14	20	0.3	0.564591	0.5	0.192136	0.535802	0.363969	FALSE	DPRX
141	rs144863520	chr5	16909722	G	T	42	2	44	0.954545	0.564591	0.75	0.675416	0.963741	0.819579	TRUE	DPRX
142	rs145396941	chr7	129780514	C	A	14	10	24	0.583333	0.564591	0.75	0.187516	0.507522	0.347519	FALSE	DPRX
143	rs1458201	chr16	30904808	G	A	8	12	20	0.4	0.564591	0.4	0.328338	0.711829	0.520083	FALSE	DPRX
144	rs1465425	chr19	33280214	A	G	18	4	22	0.818182	0.564591	0.8	0.305512	0.75191	0.528711	FALSE	DPRX
145	rs146605240	chr20	50931128	C	T	18	4	22	0.818182	0.564591	0.8	0.305512	0.75191	0.528711	FALSE	DPRX
146	rs148383532	chr16	11797264	G	A	18	2	20	0.9	0.564591	0.25	0.876703	0.987662	0.932182	TRUE	DPRX
147	rs148506022	chr2	104853785	C	A	6	4	10	0.6	0.564591	0	0.9764	0.998129	0.987264	TRUE	DPRX
148	rs148676149	chr22	46679875	G	A	6	4	10	0.6	0.564591	1	0.0033133	0.0647875	0.0340504	TRUE	DPRX
149	rs149273644	chr3	38990116	C	A	8	2	10	0.8	0.564591	1	0.0113642	0.216439	0.113901	TRUE	DPRX
150	rs149673144	chr4	94758169	G	T	8	2	10	0.8	0.564591	1	0.0113642	0.216439	0.113901	TRUE	DPRX
151	rs150235640	chr6	17393872	T	G	22	2	24	0.916667	0.564591	1	0.0300701	0.334179	0.182124	TRUE	DPRX
152	rs150519022	chr16	51151771	C	T	6	8	14	0.428571	0.564591	1	0.00489309	0.0238058	0.0143494	TRUE	DPRX
153	rs1518100	chr2	198712655	C	T	8	4	12	0.666667	0.564591	0	0.984996	0.998124	0.99156	TRUE	DPRX
154	rs1554089	chr16	27796172	C	T	16	2	18	0.888889	0.564591	1	0.0228467	0.301554	0.1622	TRUE	DPRX
155	rs15651	chr1	110338323	G	C	2	20	22	0.0909091	0.564591	0	0.754653	0.977739	0.866196	TRUE	DPRX
156	rs1569584	chr1	22225973	G	A	14	2	16	0.875	0.564591	1	0.0203597	0.293559	0.15696	TRUE	DPRX
157	rs1570405	chr14	54087516	G	A	4	4	8	0.5	0.564591	1	0.00254167	0.0420938	0.0223177	TRUE	DPRX
158	rs159871	chr19	58038913	G	C	10	2	12	0.833333	0.564591	1	0.011903	0.23797	0.124936	TRUE	DPRX
159	rs1603493	chr8	114518319	C	G	4	4	8	0.5	0.564591	1	0.00254167	0.0420938	0.0223177	TRUE	DPRX
160	rs1613211	chr16	11227283	T	C	8	2	10	0.8	0.564591	0	0.990316	0.999524	0.99492	TRUE	DPRX
161	rs1619845	chr12	104517363	T	A	4	6	10	0.4	0.564591	0	0.945527	0.994127	0.969827	TRUE	DPRX
162	rs1642762	chr17	7651454	C	T	10	8	18	0.555556	0.564591	1	0.00522274	0.0295451	0.0173839	TRUE	DPRX
163	rs1667578	chr12	121800474	T	G	8	8	16	0.5	0.564591	0.5	0.313917	0.724188	0.519052	FALSE	DPRX
164	rs1667605	chr2	74147757	G	A	6	12	18	0.333333	0.564591	0.428571	0.23892	0.645322	0.442121	FALSE	DPRX
165	rs16982010	chr19	48345040	C	T	10	2	12	0.833333	0.564591	1	0.011903	0.23797	0.124936	TRUE	DPRX
166	rs17137544	chr16	5042903	C	G	14	2	16	0.875	0.564591	1	0.0203597	0.293559	0.15696	TRUE	DPRX
167	rs1725226	chr1	7526711	C	A	6	6	12	0.5	0.564591	1	0.00442501	0.0341771	0.019301	TRUE	DPRX
168	rs17272784	chr19	49362271	G	C	12	6	18	0.666667	0.564591	0.666667	0.282973	0.704322	0.493647	FALSE	DPRX
169	rs1727332	chr12	123233754	C	T	12	4	16	0.75	0.564591	1	0.00779981	0.0934326	0.0506162	TRUE	DPRX
170	rs17345153	chr1	205210869	A	G	8	8	16	0.5	0.564591	1	0.00488428	0.0258731	0.0153787	TRUE	DPRX
171	rs17490331	chr2	38015177	G	A	4	12	16	0.25	0.564591	1	0.00134613	0.0103817	0.00586391	TRUE	DPRX
172	rs17548596	chr17	35374471	T	C	8	16	24	0.333333	0.564591	0.166667	0.549612	0.850799	0.700206	FALSE	DPRX
173	rs17694108	chr19	33240645	G	A	2	12	14	0.142857	0.564591	0.142857	0.294516	0.811702	0.553109	FALSE	DPRX
174	rs17719836	chr7	157222944	A	G	8	6	14	0.571429	0.564591	0	0.979461	0.997589	0.988525	TRUE	DPRX
175	rs17882748	chr21	33403415	T	C	16	4	20	0.8	0.564591	1	0.0134509	0.117673	0.0655621	TRUE	DPRX
176	rs178895	chr17	31472396	G	A	12	2	14	0.857143	0.564591	1	0.0154119	0.27594	0.145676	TRUE	DPRX
177	rs181215628	chr22	44331672	C	G	12	4	16	0.75	0.564591	0	0.992063	0.998719	0.995391	TRUE	DPRX
178	rs182596128	chr1	11655099	G	A	14	2	16	0.875	0.564591	1	0.0203597	0.293559	0.15696	TRUE	DPRX
179	rs1834034	chr16	71883781	T	C	2	8	10	0.2	0.564591	0.333333	0.182323	0.689786	0.436055	FALSE	DPRX
180	rs183710123	chr14	31059716	T	C	12	10	22	0.545455	0.564591	0.5	0.373365	0.73294	0.553152	FALSE	DPRX
181	rs184738408	chr5	39075155	C	G	20	2	22	0.909091	0.564591	0.833333	0.339851	0.833056	0.586453	FALSE	DPRX
182	rs1853932	chr6	124849033	C	A	12	2	14	0.857143	0.564591	1	0.0154119	0.27594	0.145676	TRUE	DPRX
183	rs185469859	chr3	173397547	C	T	8	6	14	0.571429	0.564591	0.333333	0.520072	0.887233	0.703653	FALSE	DPRX
184	rs1882551	chr12	6767122	G	C	12	10	22	0.545455	0.564591	1	0.00525688	0.028821	0.017039	TRUE	DPRX
185	rs1886891	chrX	70494634	A	G	10	4	14	0.714286	0.564591	1	0.0103903	0.0828199	0.0466051	TRUE	DPRX
186	rs190199354	chr22	45009933	C	T	8	12	20	0.4	0.564591	0.333333	0.383462	0.768823	0.576143	FALSE	DPRX
187	rs190518462	chr1	161166275	C	A	44	2	46	0.956522	0.564591	1	0.0560497	0.455279	0.255664	FALSE	DPRX
188	rs190758047	chr18	24427487	G	T	12	2	14	0.857143	0.564591	1	0.0154119	0.27594	0.145676	TRUE	DPRX
189	rs1951351	chr14	92296850	G	A	6	8	14	0.428571	0.564591	0	0.963886	0.997348	0.980617	TRUE	DPRX
190	rs2154611	chr22	24593953	C	T	2	6	8	0.25	0.564591	0	0.880369	0.992573	0.936471	TRUE	DPRX
191	rs2158533	chr14	71233104	G	C	6	6	12	0.5	0.564591	0.75	0.10487	0.497884	0.301377	FALSE	DPRX
192	rs2163412	chr14	34085177	G	T	12	4	16	0.75	0.564591	1	0.00779981	0.0934326	0.0506162	TRUE	DPRX
193	rs2193382	chr12	22130017	C	T	6	4	10	0.6	0.564591	1	0.0033133	0.0647875	0.0340504	TRUE	DPRX
194	rs221210	chr7	157484903	C	T	8	4	12	0.666667	0.564591	0.5	0.43613	0.869097	0.652613	FALSE	DPRX
195	rs2240393	chr7	85025415	T	C	10	10	20	0.5	0.564591	0.5	0.331111	0.708961	0.520036	FALSE	DPRX
196	rs2251603	chr12	50655870	G	A	4	6	10	0.4	0.564591	0.666667	0.122137	0.542809	0.332473	FALSE	DPRX
197	rs2254854	chr7	139778286	C	T	16	8	24	0.666667	0.564591	0.5	0.478469	0.81939	0.648929	FALSE	DPRX
198	rs2258766	chr3	9363240	G	C	2	14	16	0.125	0.564591	0.25	0.148245	0.63125	0.389748	FALSE	DPRX
199	rs2272041	chr11	76206627	G	T	8	8	16	0.5	0.564591	0	0.976048	0.995359	0.985704	TRUE	DPRX
200	rs2273804	chr14	100376300	C	G	24	8	32	0.75	0.564591	0.666667	0.429279	0.767686	0.598482	FALSE	DPRX
201	rs2277843	chr22	36507202	T	G	8	26	34	0.235294	0.564591	1	0.00146851	0.00791021	0.00468936	TRUE	DPRX
202	rs2281864	chr13	36346475	C	T	2	18	20	0.1	0.564591	1	0.00104275	0.00403272	0.00253773	TRUE	DPRX
203	rs2284292	chr7	108446980	C	T	12	2	14	0.857143	0.564591	0	0.994719	0.99959	0.997154	TRUE	DPRX
204	rs2302616	chr2	10448065	C	A	4	12	16	0.25	0.564591	0.5	0.134443	0.528257	0.33135	FALSE	DPRX
205	rs238767	chr19	6517111	G	A	6	16	22	0.272727	0.564591	1	0.00229803	0.00956165	0.00592984	TRUE	DPRX
206	rs2412974	chr22	30143832	C	T	6	4	10	0.6	0.564591	0	0.9764	0.998129	0.987264	TRUE	DPRX
207	rs2474438	chr20	3768366	C	G	8	10	18	0.444444	0.564591	0.5	0.263696	0.663005	0.463351	FALSE	DPRX
208	rs2478978	chr1	43565986	C	T	6	6	12	0.5	0.564591	0	0.973156	0.997787	0.985472	TRUE	DPRX
209	rs2486	chr2	195658161	C	T	10	4	14	0.714286	0.564591	0.666667	0.319814	0.777597	0.548705	FALSE	DPRX
210	rs2510398	chr11	68653948	G	A	6	4	10	0.6	0.564591	0.5	0.341619	0.823532	0.582575	FALSE	DPRX
211	rs2531737	chr17	58476996	A	G	6	8	14	0.428571	0.564591	0	0.963886	0.997348	0.980617	TRUE	DPRX
212	rs25405	chr20	5119342	T	C	12	6	18	0.666667	0.564591	0.666667	0.282973	0.704322	0.493647	FALSE	DPRX
213	rs2585126	chr8	142777765	A	C	4	2	6	0.666667	0.564591	1	0.00371333	0.140923	0.072318	TRUE	DPRX
214	rs2640734	chr8	27675137	C	T	14	2	16	0.875	0.564591	0.75	0.398283	0.877537	0.63791	FALSE	DPRX
215	rs2673346	chr3	123144379	T	C	10	10	20	0.5	0.564591	0.5	0.331111	0.708961	0.520036	FALSE	DPRX
216	rs2717601	chr8	142726506	T	C	6	8	14	0.428571	0.564591	0	0.963886	0.997348	0.980617	TRUE	DPRX
217	rs2821226	chr1	203548164	A	G	16	2	18	0.888889	0.564591	1	0.0228467	0.301554	0.1622	TRUE	DPRX
218	rs2835786	chr21	37531748	A	G	8	6	14	0.571429	0.564591	1	0.00556437	0.0399149	0.0227397	TRUE	DPRX
219	rs2837260	chr21	39853323	C	A	8	4	12	0.666667	0.564591	1	0.00742796	0.0716062	0.0395171	TRUE	DPRX
220	rs28459852	chr8	142905020	T	A	6	2	8	0.75	0.564591	1	0.00559834	0.181312	0.0934552	TRUE	DPRX
221	rs28484580	chr4	102502392	A	G	2	4	6	0.333333	0.564591	0.5	0.156535	0.704706	0.430621	FALSE	DPRX
222	rs2854330	chr17	31383745	T	G	14	6	20	0.7	0.564591	0.5	0.486171	0.840853	0.663512	FALSE	DPRX
223	rs28548701	chr15	74053680	T	C	8	2	10	0.8	0.564591	0.5	0.514961	0.927139	0.72105	FALSE	DPRX
224	rs28565312	chr1	100352005	C	T	24	2	26	0.923077	0.564591	1	0.0267642	0.352056	0.18941	TRUE	DPRX
225	rs2856968	chr21	33325676	A	G	14	6	20	0.7	0.564591	1	0.00948736	0.0583782	0.0339328	TRUE	DPRX
226	rs2858942	chr16	175654	A	C	8	4	12	0.666667	0.564591	0.666667	0.283624	0.764376	0.524	FALSE	DPRX
227	rs28654239	chr16	1351894	G	C	10	14	24	0.416667	0.564591	0.666667	0.14917	0.438463	0.293816	FALSE	DPRX
228	rs28665476	chr21	46325462	G	A	4	18	22	0.181818	0.564591	0	0.89534	0.988046	0.941693	TRUE	DPRX
229	rs2869427	chr20	51562426	G	C	12	6	18	0.666667	0.564591	0.6	0.361501	0.769142	0.565321	FALSE	DPRX
230	rs28709500	chr8	98427044	T	C	8	2	10	0.8	0.564591	1	0.0113642	0.216439	0.113901	TRUE	DPRX
231	rs2913858	chr5	178232777	G	A	18	2	20	0.9	0.564591	1	0.0228147	0.31004	0.166427	TRUE	DPRX
232	rs2929408	chr3	20041477	C	A	12	8	20	0.6	0.564591	1	0.00628872	0.0359578	0.0211233	TRUE	DPRX
233	rs2932690	chr16	88776545	G	A	8	4	12	0.666667	0.564591	0	0.984996	0.998124	0.99156	TRUE	DPRX
234	rs2933310	chr3	10993660	G	T	4	12	16	0.25	0.564591	0.333333	0.235135	0.680794	0.457965	FALSE	DPRX
235	rs2981305	chr8	35076352	C	G	8	2	10	0.8	0.564591	0	0.990316	0.999524	0.99492	TRUE	DPRX
236	rs29939	chr19	33819895	A	G	22	4	26	0.846154	0.564591	0.4	0.754526	0.955518	0.855022	TRUE	DPRX
237	rs299644	chr3	12533398	A	G	8	6	14	0.571429	0.564591	1	0.00556437	0.0399149	0.0227397	TRUE	DPRX
238	rs30473	chr5	4982462	C	T	4	6	10	0.4	0.564591	1	0.00358953	0.0264676	0.0150285	TRUE	DPRX
239	rs3087357	chr2	200963642	C	G	12	12	24	0.5	0.564591	0.333333	0.507186	0.828024	0.667605	FALSE	DPRX
240	rs3213141	chr20	33686574	G	A	14	4	18	0.777778	0.564591	0.666667	0.410384	0.836403	0.623393	FALSE	DPRX
241	rs3218026	chr19	29812231	C	A	10	8	18	0.555556	0.564591	0	0.982162	0.995487	0.988825	TRUE	DPRX
242	rs331633	chr1	59214907	A	G	20	2	22	0.909091	0.564591	1	0.0273997	0.322002	0.174701	TRUE	DPRX
243	rs332109	chr2	118680588	A	G	6	2	8	0.75	0.564591	0	0.984193	0.999327	0.99176	TRUE	DPRX
244	rs34013846	chr1	223300135	A	C	10	16	26	0.384615	0.564591	0.5	0.245589	0.581368	0.413479	FALSE	DPRX
245	rs34063697	chr18	22348226	G	A	2	16	18	0.111111	0.564591	0	0.802237	0.984132	0.893184	TRUE	DPRX
246	rs34096439	chr16	54287459	G	A	2	16	18	0.111111	0.564591	1	0.00128008	0.00681279	0.00404644	TRUE	DPRX
247	rs34255732	chr15	90249708	C	A	12	12	24	0.5	0.564591	0.714286	0.163045	0.472413	0.317729	FALSE	DPRX
248	rs34523061	chr3	122023607	C	G	6	10	16	0.375	0.564591	0.5	0.227456	0.63691	0.432183	FALSE	DPRX
249	rs34743535	chr12	25675981	A	C	14	12	26	0.538462	0.564591	1	0.00652231	0.023269	0.0148957	TRUE	DPRX
250	rs34829483	chr15	77543644	C	T	12	2	14	0.857143	0.564591	0	0.994719	0.99959	0.997154	TRUE	DPRX
251	rs34892054	chr20	407872	C	T	34	2	36	0.944444	0.564591	1	0.0322034	0.410104	0.221153	FALSE	DPRX
252	rs34927559	chr1	1019636	A	G	10	6	16	0.625	0.564591	0	0.984953	0.99715	0.991051	TRUE	DPRX
253	rs34948680	chr7	140231658	G	C	16	4	20	0.8	0.564591	0.6	0.506845	0.880113	0.693479	FALSE	DPRX
254	rs34967860	chr19	8048735	C	T	10	2	12	0.833333	0.564591	1	0.011903	0.23797	0.124936	TRUE	DPRX
255	rs35051118	chr17	27793946	G	A	12	8	20	0.6	0.564591	0.6	0.323287	0.716691	0.519989	FALSE	DPRX
256	rs35348911	chr7	158647291	G	C	6	12	18	0.333333	0.564591	0.666667	0.0988479	0.398179	0.248513	TRUE	DPRX
257	rs35501398	chr19	12801913	G	A	8	8	16	0.5	0.564591	0.6	0.220248	0.624566	0.422407	FALSE	DPRX
258	rs35687055	chr21	39313049	C	T	2	18	20	0.1	0.564591	0	0.781036	0.984215	0.882625	TRUE	DPRX
259	rs35709881	chr21	42844714	G	A	6	10	16	0.375	0.564591	0	0.956103	0.995392	0.975747	TRUE	DPRX
260	rs35758028	chr7	121136806	G	A	8	4	12	0.666667	0.564591	0.666667	0.283624	0.764376	0.524	FALSE	DPRX
261	rs35834163	chr12	77065524	C	G	12	14	26	0.461538	0.564591	0.2	0.640041	0.887834	0.763937	TRUE	DPRX
262	rs35959283	chr3	194256724	G	A	8	4	12	0.666667	0.564591	1	0.00742796	0.0716062	0.0395171	TRUE	DPRX
263	rs367743592	chr19	15281227	A	C	54	8	62	0.870968	0.564591	1	0.0318602	0.122669	0.0772645	TRUE	DPRX
264	rs371870626	chr19	2151652	C	G	14	2	16	0.875	0.564591	1	0.0203597	0.293559	0.15696	TRUE	DPRX
265	rs3736641	chr3	148991372	G	C	10	10	20	0.5	0.564591	0	0.977384	0.995356	0.98637	TRUE	DPRX
266	rs3738520	chr1	235866598	C	T	4	14	18	0.222222	0.564591	0.142857	0.440682	0.842654	0.641668	FALSE	DPRX
267	rs3741747	chr12	64610536	T	C	12	2	14	0.857143	0.564591	0.5	0.619394	0.961539	0.790466	TRUE	DPRX
268	rs3742210	chr13	109783885	G	A	8	4	12	0.666667	0.564591	0.5	0.43613	0.869097	0.652613	FALSE	DPRX
269	rs3742681	chr14	88554903	G	A	16	4	20	0.8	0.564591	0.428571	0.669803	0.94307	0.806436	TRUE	DPRX
270	rs3745648	chr19	12832824	G	C	16	16	32	0.5	0.564591	1	0.00503615	0.0184713	0.0117537	TRUE	DPRX
271	rs3745690	chr19	11355475	T	C	4	10	14	0.285714	0.564591	0.333333	0.244461	0.705583	0.475022	FALSE	DPRX
272	rs3750243	chr8	38030499	C	G	10	8	18	0.555556	0.564591	1	0.00522274	0.0295451	0.0173839	TRUE	DPRX
273	rs3752547	chr1	9234844	C	G	10	16	26	0.384615	0.564591	0.5	0.245589	0.581368	0.413479	FALSE	DPRX
274	rs3756662	chr5	33440518	C	T	18	8	26	0.692308	0.564591	0.5	0.521021	0.840448	0.680735	FALSE	DPRX
275	rs3760828	chr19	31338380	T	C	26	2	28	0.928571	0.564591	1	0.0295268	0.363103	0.196315	TRUE	DPRX
276	rs376374327	chr16	4293395	A	T	14	2	16	0.875	0.564591	1	0.0203597	0.293559	0.15696	TRUE	DPRX
277	rs3775122	chr4	899499	G	A	2	10	12	0.166667	0.564591	0	0.855947	0.988594	0.922271	TRUE	DPRX
278	rs3795572	chr1	204222281	T	C	2	12	14	0.142857	0.564591	0.5	0.0629253	0.439565	0.251245	FALSE	DPRX
279	rs3803790	chr17	74431161	C	T	6	10	16	0.375	0.564591	0.2	0.513471	0.86601	0.68974	FALSE	DPRX
280	rs3809139	chr12	26126635	G	A	12	14	26	0.461538	0.564591	0	0.976448	0.994492	0.98547	TRUE	DPRX
281	rs3814875	chr16	74985172	C	A	2	12	14	0.142857	0.564591	0.333333	0.140594	0.599659	0.370126	FALSE	DPRX
282	rs381607	chr19	18070200	A	G	20	2	22	0.909091	0.564591	0	0.997578	0.999581	0.998579	TRUE	DPRX
283	rs3818535	chr13	102597356	A	G	2	14	16	0.125	0.564591	0.333333	0.119063	0.56033	0.339697	FALSE	DPRX
284	rs3821090	chr2	170929578	C	T	8	6	14	0.571429	0.564591	0	0.979461	0.997589	0.988525	TRUE	DPRX
285	rs3826792	chr19	47273441	T	C	20	12	32	0.625	0.564591	0	0.989856	0.99608	0.992968	TRUE	DPRX
286	rs3827189	chr21	36939693	C	T	18	2	20	0.9	0.564591	1	0.0228147	0.31004	0.166427	TRUE	DPRX
287	rs3845191	chr12	120229296	G	T	10	8	18	0.555556	0.564591	0.666667	0.210213	0.617417	0.413815	FALSE	DPRX
288	rs387526	chr8	129823514	T	A	6	4	10	0.6	0.564591	0	0.9764	0.998129	0.987264	TRUE	DPRX
289	rs3897473	chr13	94601666	T	G	12	6	18	0.666667	0.564591	1	0.00777341	0.0493942	0.0285838	TRUE	DPRX
290	rs390784	chr19	43984037	G	T	10	28	38	0.263158	0.564591	0.2	0.447828	0.762449	0.605139	FALSE	DPRX
291	rs4076988	chr16	86855954	T	C	4	4	8	0.5	0.564591	0.5	0.27479	0.790387	0.532588	FALSE	DPRX
292	rs41301797	chr16	28984904	T	C	10	2	12	0.833333	0.564591	1	0.011903	0.23797	0.124936	TRUE	DPRX
293	rs4292	chr17	63476980	C	T	6	10	16	0.375	0.564591	0	0.956103	0.995392	0.975747	TRUE	DPRX
294	rs4438692	chr3	51029821	G	A	2	10	12	0.166667	0.564591	0.75	0.0269636	0.245129	0.136046	TRUE	DPRX
295	rs444870	chr19	13756888	A	G	6	2	8	0.75	0.564591	1	0.00559834	0.181312	0.0934552	TRUE	DPRX
296	rs4621370	chr3	160565338	A	C	8	4	12	0.666667	0.564591	0.5	0.43613	0.869097	0.652613	FALSE	DPRX
297	rs4635350	chr16	28277922	C	T	8	20	28	0.285714	0.564591	1	0.00229419	0.00804277	0.00516848	TRUE	DPRX
298	rs464646	chr21	26216994	A	C	12	2	14	0.857143	0.564591	1	0.0154119	0.27594	0.145676	TRUE	DPRX
299	rs4661927	chr1	16725252	G	C	16	2	18	0.888889	0.564591	1	0.0228467	0.301554	0.1622	TRUE	DPRX
300	rs4707316	chr6	86724904	G	A	4	8	12	0.333333	0.564591	1	0.00368998	0.0163821	0.0100361	TRUE	DPRX
301	rs4726407	chr7	154319659	C	A	6	6	12	0.5	0.564591	0.666667	0.162133	0.597919	0.380026	FALSE	DPRX
302	rs4739527	chr8	37633075	T	C	16	8	24	0.666667	0.564591	0.666667	0.327205	0.699736	0.51347	FALSE	DPRX
303	rs474226	chr1	201721515	G	C	20	4	24	0.833333	0.564591	1	0.0197171	0.131795	0.075756	TRUE	DPRX
304	rs4766460	chr12	111397205	A	G	6	24	30	0.2	0.564591	0.75	0.0404782	0.175619	0.108048	TRUE	DPRX
305	rs4790649	chr17	4584166	G	C	6	16	22	0.272727	0.564591	0	0.933652	0.988221	0.960937	TRUE	DPRX
306	rs4815369	chr20	25085097	C	G	2	6	8	0.25	0.564591	0	0.880369	0.992573	0.936471	TRUE	DPRX
307	rs4826355	chrX	53814810	C	T	2	6	8	0.25	0.564591	0.5	0.103996	0.588603	0.346299	FALSE	DPRX
308	rs4845677	chr1	154865574	C	T	12	6	18	0.666667	0.564591	0	0.986461	0.996753	0.991607	TRUE	DPRX
309	rs4916365	chr1	173506534	G	C	4	6	10	0.4	0.564591	1	0.00358953	0.0264676	0.0150285	TRUE	DPRX
310	rs4964214	chr12	107380447	C	A	14	8	22	0.636364	0.564591	1	0.00842389	0.0391173	0.0237706	TRUE	DPRX
311	rs4968069	chr17	929225	C	T	2	12	14	0.142857	0.564591	0.5	0.0629253	0.439565	0.251245	FALSE	DPRX
312	rs4984903	chr16	630695	A	G	10	6	16	0.625	0.564591	1	0.0089604	0.0450738	0.0270171	TRUE	DPRX
313	rs4989100	chr1	202144707	T	G	16	4	20	0.8	0.564591	0.714286	0.387253	0.813436	0.600344	FALSE	DPRX
314	rs543589	chr1	66271377	A	C	8	10	18	0.444444	0.564591	0.666667	0.169564	0.504707	0.337136	FALSE	DPRX
315	rs551890	chr11	64710527	C	T	6	6	12	0.5	0.564591	1	0.00442501	0.0341771	0.019301	TRUE	DPRX
316	rs5520	chr4	148444757	C	G	2	6	8	0.25	0.564591	0	0.880369	0.992573	0.936471	TRUE	DPRX
317	rs55952242	chr3	183468939	G	C	4	2	6	0.666667	0.564591	1	0.00371333	0.140923	0.072318	TRUE	DPRX
318	rs56033857	chr16	74713553	C	G	2	14	16	0.125	0.564591	0	0.805035	0.987109	0.896072	TRUE	DPRX
319	rs56051972	chr17	41528346	C	G	18	8	26	0.692308	0.564591	0	0.991446	0.998103	0.994775	TRUE	DPRX
320	rs560804	chr1	201721861	C	T	28	20	48	0.583333	0.564591	0.333333	0.628573	0.833981	0.731277	TRUE	DPRX
321	rs56166765	chr14	55271300	T	C	8	20	28	0.285714	0.564591	0.833333	0.04285	0.162921	0.102885	TRUE	DPRX
322	rs56283994	chr21	39035736	T	A	14	2	16	0.875	0.564591	1	0.0203597	0.293559	0.15696	TRUE	DPRX
323	rs56376587	chr18	79400235	A	C	6	2	8	0.75	0.564591	1	0.00559834	0.181312	0.0934552	TRUE	DPRX
324	rs56393815	chr1	18601802	G	A	8	4	12	0.666667	0.564591	1	0.00742796	0.0716062	0.0395171	TRUE	DPRX
325	rs57395897	chr19	4868115	C	T	2	8	10	0.2	0.564591	0	0.863046	0.993228	0.928137	TRUE	DPRX
326	rs5756558	chr22	37212671	C	T	8	8	16	0.5	0.564591	0	0.976048	0.995359	0.985704	TRUE	DPRX
327	rs57694483	chr17	2706923	C	G	2	10	12	0.166667	0.564591	0	0.855947	0.988594	0.922271	TRUE	DPRX
328	rs58764079	chr21	41460029	C	T	8	4	12	0.666667	0.564591	0.5	0.43613	0.869097	0.652613	FALSE	DPRX
329	rs58845293	chr21	35867548	C	T	10	4	14	0.714286	0.564591	1	0.0103903	0.0828199	0.0466051	TRUE	DPRX
330	rs59133000	chr5	40798872	C	T	8	10	18	0.444444	0.564591	0.5	0.263696	0.663005	0.463351	FALSE	DPRX
331	rs594033	chr17	76840075	A	G	4	12	16	0.25	0.564591	0	0.913836	0.99316	0.953498	TRUE	DPRX
332	rs59448769	chr1	26378545	G	A	20	10	30	0.666667	0.564591	0.75	0.268345	0.59803	0.433187	FALSE	DPRX
333	rs5957164	chrX	119399460	T	C	8	2	10	0.8	0.564591	0.666667	0.356587	0.859621	0.608104	FALSE	DPRX
334	rs5997893	chr22	31160117	A	G	4	18	22	0.181818	0.564591	1	0.00208543	0.00951459	0.00580001	TRUE	DPRX
335	rs60216010	chr21	43884000	G	A	6	16	22	0.272727	0.564591	0	0.933652	0.988221	0.960937	TRUE	DPRX
336	rs6033858	chr20	1467025	C	T	20	6	26	0.769231	0.564591	0.625	0.471205	0.828537	0.649871	FALSE	DPRX
337	rs60460929	chr21	33055452	C	T	2	22	24	0.0833333	0.564591	0	0.739856	0.975105	0.857481	TRUE	DPRX
338	rs60532842	chr17	13600877	C	A	18	4	22	0.818182	0.564591	0	0.995197	0.999248	0.997223	TRUE	DPRX
339	rs60606979	chr19	57351088	A	G	6	6	12	0.5	0.564591	0.333333	0.432402	0.847653	0.640028	FALSE	DPRX
340	rs6067168	chr20	49659307	A	G	8	8	16	0.5	0.564591	0.5	0.313917	0.724188	0.519052	FALSE	DPRX
341	rs61080184	chr11	106022513	T	C	8	4	12	0.666667	0.564591	0	0.984996	0.998124	0.99156	TRUE	DPRX
342	rs6116931	chr20	645645	G	A	18	2	20	0.9	0.564591	1	0.0228147	0.31004	0.166427	TRUE	DPRX
343	rs6139097	chr20	408557	G	A	32	2	34	0.941176	0.564591	1	0.0408113	0.3825	0.211656	TRUE	DPRX
344	rs6142641	chr20	62369202	G	A	4	24	28	0.142857	0.564591	0	0.869842	0.982466	0.926154	TRUE	DPRX
345	rs61574875	chr14	94937016	G	C	4	16	20	0.2	0.564591	1	0.00119735	0.00615913	0.00367824	TRUE	DPRX
346	rs61773957	chr1	24643647	C	G	16	8	24	0.666667	0.564591	0.6	0.391836	0.746679	0.569257	FALSE	DPRX
347	rs61891528	chr11	50268063	G	A	6	4	10	0.6	0.564591	1	0.0033133	0.0647875	0.0340504	TRUE	DPRX
348	rs61933191	chr12	64452087	G	A	16	14	30	0.533333	0.564591	0.6	0.282435	0.609274	0.445854	FALSE	DPRX
349	rs61957990	chr13	52371868	C	A	8	6	14	0.571429	0.564591	1	0.00556437	0.0399149	0.0227397	TRUE	DPRX
350	rs62049031	chr16	70438810	C	T	4	8	12	0.333333	0.564591	0.25	0.385398	0.827345	0.606372	FALSE	DPRX
351	rs62107058	chr19	40530059	C	T	24	2	26	0.923077	0.564591	1	0.0267642	0.352056	0.18941	TRUE	DPRX
352	rs62109945	chr19	13193126	T	C	2	4	6	0.333333	0.564591	1	0.00243978	0.0293341	0.0158869	TRUE	DPRX
353	rs62181670	chr2	171523636	C	T	14	2	16	0.875	0.564591	1	0.0203597	0.293559	0.15696	TRUE	DPRX
354	rs62226377	chr21	33382488	A	G	12	2	14	0.857143	0.564591	1	0.0154119	0.27594	0.145676	TRUE	DPRX
355	rs62227745	chr21	33692427	G	A	2	10	12	0.166667	0.564591	0	0.855947	0.988594	0.922271	TRUE	DPRX
356	rs62237785	chr22	17121274	C	G	14	12	26	0.538462	0.564591	0.25	0.633443	0.876861	0.755152	TRUE	DPRX
357	rs635299	chr19	45770913	A	C	40	2	42	0.952381	0.564591	1	0.0466527	0.432477	0.239565	FALSE	DPRX
358	rs6442461	chr3	14540087	A	G	4	6	10	0.4	0.564591	1	0.00358953	0.0264676	0.0150285	TRUE	DPRX
359	rs6471522	chr8	95190746	A	C	6	4	10	0.6	0.564591	0.5	0.341619	0.823532	0.582575	FALSE	DPRX
360	rs655530	chr12	120584472	T	C	4	14	18	0.222222	0.564591	0	0.913224	0.990741	0.951983	TRUE	DPRX
361	rs6578052	chr8	139915760	A	G	6	4	10	0.6	0.564591	0.5	0.341619	0.823532	0.582575	FALSE	DPRX
362	rs66498525	chr19	20474005	G	T	2	6	8	0.25	0.564591	0.5	0.103996	0.588603	0.346299	FALSE	DPRX
363	rs6684516	chr1	16153010	T	C	6	16	22	0.272727	0.564591	0.5	0.162489	0.502866	0.332678	FALSE	DPRX
364	rs6688581	chr1	200670028	G	A	10	4	14	0.714286	0.564591	0.333333	0.635135	0.934079	0.784607	TRUE	DPRX
365	rs6695315	chr1	171468735	A	G	2	6	8	0.25	0.564591	0	0.880369	0.992573	0.936471	TRUE	DPRX
366	rs6725613	chr2	26350478	C	A	14	8	22	0.636364	0.564591	1	0.00842389	0.0391173	0.0237706	TRUE	DPRX
367	rs6726787	chr2	149994464	T	C	2	10	12	0.166667	0.564591	0.25	0.200099	0.703055	0.451577	FALSE	DPRX
368	rs6730625	chr2	202043452	C	T	2	10	12	0.166667	0.564591	1	0.000986031	0.00974679	0.00536641	TRUE	DPRX
369	rs6731839	chr2	65573422	G	A	10	4	14	0.714286	0.564591	1	0.0103903	0.0828199	0.0466051	TRUE	DPRX
370	rs67376518	chr1	181099780	A	T	14	10	24	0.583333	0.564591	0.5	0.414295	0.754287	0.584291	FALSE	DPRX
371	rs67664103	chr8	17374058	C	G	24	2	26	0.923077	0.564591	0.666667	0.633508	0.961279	0.797393	TRUE	DPRX
372	rs67775867	chr17	79215021	C	G	6	8	14	0.428571	0.564591	0	0.963886	0.997348	0.980617	TRUE	DPRX
373	rs6784499	chr3	186591658	C	G	6	8	14	0.428571	0.564591	1	0.00489309	0.0238058	0.0143494	TRUE	DPRX
374	rs67903834	chr16	49838960	T	C	2	10	12	0.166667	0.564591	0	0.855947	0.988594	0.922271	TRUE	DPRX
375	rs6960603	chr7	141072599	G	A	18	6	24	0.75	0.564591	0.75	0.311676	0.714743	0.513209	FALSE	DPRX
376	rs6982888	chr8	42152948	A	G	2	20	22	0.0909091	0.564591	0.666667	0.0193067	0.181858	0.100583	TRUE	DPRX
377	rs700618	chr5	138752429	C	T	2	20	22	0.0909091	0.564591	0	0.754653	0.977739	0.866196	TRUE	DPRX
378	rs7014800	chr8	130195426	C	T	6	8	14	0.428571	0.564591	1	0.00489309	0.0238058	0.0143494	TRUE	DPRX
379	rs7065257	chrX	115068897	A	T	4	12	16	0.25	0.564591	0.5	0.134443	0.528257	0.33135	FALSE	DPRX
380	rs710623	chr12	67270198	T	G	10	12	22	0.454545	0.564591	0	0.971276	0.99365	0.982463	TRUE	DPRX
381	rs7175303	chr15	101251400	G	A	4	12	16	0.25	0.564591	0.333333	0.235135	0.680794	0.457965	FALSE	DPRX
382	rs7198817	chr16	11851921	C	A	6	4	10	0.6	0.564591	1	0.0033133	0.0647875	0.0340504	TRUE	DPRX
383	rs7203657	chr16	54930014	T	C	8	6	14	0.571429	0.564591	1	0.00556437	0.0399149	0.0227397	TRUE	DPRX
384	rs7208143	chr17	1908689	G	T	8	2	10	0.8	0.564591	0.5	0.514961	0.927139	0.72105	FALSE	DPRX
385	rs7214370	chr17	57045936	G	A	8	6	14	0.571429	0.564591	0.333333	0.520072	0.887233	0.703653	FALSE	DPRX
386	rs7250497	chr19	45855167	A	G	2	8	10	0.2	0.564591	0.5	0.0889701	0.526624	0.307797	FALSE	DPRX
387	rs7250955	chr19	43316023	G	A	16	2	18	0.888889	0.564591	0.666667	0.533779	0.93749	0.735635	FALSE	DPRX
388	rs7254894	chr19	33218846	C	T	4	18	22	0.181818	0.564591	0	0.89534	0.988046	0.941693	TRUE	DPRX
389	rs7262274	chr20	34825373	G	C	12	6	18	0.666667	0.564591	0.5	0.467312	0.856133	0.661723	FALSE	DPRX
390	rs72624936	chr7	128409970	A	C	26	2	28	0.928571	0.564591	1	0.0295268	0.363103	0.196315	TRUE	DPRX
391	rs72630713	chrX	74420506	T	G	14	4	18	0.777778	0.564591	0.333333	0.72356	0.952514	0.838037	TRUE	DPRX
392	rs72637870	chr8	33060539	A	T	8	2	10	0.8	0.564591	1	0.0113642	0.216439	0.113901	TRUE	DPRX
393	rs7268511	chr20	37838169	G	A	4	10	14	0.285714	0.564591	0.666667	0.0816328	0.392471	0.237052	TRUE	DPRX
394	rs72698839	chr14	94750756	C	G	6	6	12	0.5	0.564591	0.333333	0.432402	0.847653	0.640028	FALSE	DPRX
395	rs72706016	chr1	161750640	G	C	2	16	18	0.111111	0.564591	0.5	0.0570958	0.361278	0.209187	TRUE	DPRX
396	rs72750481	chr5	28333752	T	C	6	8	14	0.428571	0.564591	0.333333	0.395903	0.807385	0.601644	FALSE	DPRX
397	rs72800847	chr16	31011318	G	A	2	8	10	0.2	0.564591	1	0.000765049	0.00983914	0.0053021	TRUE	DPRX
398	rs72975368	chr19	2495281	T	A	2	14	16	0.125	0.564591	0.5	0.0581397	0.378247	0.218193	TRUE	DPRX
399	rs73003874	chr2	232420570	T	C	4	4	8	0.5	0.564591	0.5	0.27479	0.790387	0.532588	FALSE	DPRX
400	rs73007510	chr19	10696023	C	T	4	12	16	0.25	0.564591	0	0.913836	0.99316	0.953498	TRUE	DPRX
401	rs73039245	chr7	2157810	T	C	20	14	34	0.588235	0.564591	0	0.987589	0.995962	0.991775	TRUE	DPRX
402	rs73068246	chr5	31570576	T	A	2	8	10	0.2	0.564591	0	0.863046	0.993228	0.928137	TRUE	DPRX
403	rs73090789	chr12	32897240	G	A	16	4	20	0.8	0.564591	0.6	0.506845	0.880113	0.693479	FALSE	DPRX
404	rs7311692	chr12	25251404	C	G	8	24	32	0.25	0.564591	0.75	0.0547288	0.205594	0.130161	TRUE	DPRX
405	rs7314434	chr12	50518488	C	T	4	8	12	0.333333	0.564591	0	0.939666	0.99269	0.966178	TRUE	DPRX
406	rs73218815	chrX	119944407	C	A	10	4	14	0.714286	0.564591	1	0.0103903	0.0828199	0.0466051	TRUE	DPRX
407	rs73220932	chr3	139534647	G	T	30	14	44	0.681818	0.564591	0.5	0.541179	0.79978	0.670479	FALSE	DPRX
408	rs73225010	chr12	120674382	A	G	6	10	16	0.375	0.564591	1	0.00254161	0.0156645	0.00910308	TRUE	DPRX
409	rs73228204	chr13	73580189	A	G	10	2	12	0.833333	0.564591	1	0.011903	0.23797	0.124936	TRUE	DPRX
410	rs7339411	chr13	39145157	T	C	16	4	20	0.8	0.564591	1	0.0134509	0.117673	0.0655621	TRUE	DPRX
411	rs73908378	chr21	43747636	C	T	4	10	14	0.285714	0.564591	0	0.927573	0.993079	0.960326	TRUE	DPRX
412	rs74177695	chr2	100321866	T	C	8	4	12	0.666667	0.564591	1	0.00742796	0.0716062	0.0395171	TRUE	DPRX
413	rs743114	chr1	93977123	A	G	18	8	26	0.692308	0.564591	0.5	0.521021	0.840448	0.680735	FALSE	DPRX
414	rs7502891	chr17	73998765	G	A	6	8	14	0.428571	0.564591	0	0.963886	0.997348	0.980617	TRUE	DPRX
415	rs75178253	chr19	44957750	A	G	4	10	14	0.285714	0.564591	0.25	0.348086	0.804809	0.576448	FALSE	DPRX
416	rs75434277	chr20	844676	T	C	28	2	30	0.933333	0.564591	1	0.032958	0.370162	0.20156	TRUE	DPRX
417	rs7566950	chr2	65228167	C	T	8	4	12	0.666667	0.564591	0.5	0.43613	0.869097	0.652613	FALSE	DPRX
418	rs7573363	chr2	45169894	G	A	2	22	24	0.0833333	0.564591	0	0.739856	0.975105	0.857481	TRUE	DPRX
419	rs75820577	chr7	98617412	C	A	10	8	18	0.555556	0.564591	0	0.982162	0.995487	0.988825	TRUE	DPRX
420	rs75851226	chr1	169894024	A	C	32	14	46	0.695652	0.564591	0.8	0.240827	0.519276	0.380051	FALSE	DPRX
421	rs75893715	chr16	1310090	C	T	4	6	10	0.4	0.564591	0	0.945527	0.994127	0.969827	TRUE	DPRX
422	rs76138953	chr16	57273451	T	C	10	4	14	0.714286	0.564591	0	0.988194	0.998918	0.993556	TRUE	DPRX
423	rs762521	chr16	13920383	G	A	8	14	22	0.363636	0.564591	0	0.957732	0.995381	0.976557	TRUE	DPRX
424	rs7647991	chr3	62369065	G	A	10	10	20	0.5	0.564591	1	0.00363654	0.0210327	0.0123346	TRUE	DPRX
425	rs76842574	chr12	118371789	G	A	10	8	18	0.555556	0.564591	1	0.00522274	0.0295451	0.0173839	TRUE	DPRX
426	rs77154567	chr17	4590331	C	T	10	4	14	0.714286	0.564591	0.333333	0.635135	0.934079	0.784607	TRUE	DPRX
427	rs774381	chr12	67046308	G	A	6	16	22	0.272727	0.564591	0.666667	0.0825446	0.327834	0.205189	TRUE	DPRX
428	rs77490555	chr16	86931418	A	G	6	8	14	0.428571	0.564591	0	0.963886	0.997348	0.980617	TRUE	DPRX
429	rs77934343	chr19	33801637	G	A	18	4	22	0.818182	0.564591	1	0.0207604	0.125115	0.0729379	TRUE	DPRX
430	rs78195628	chr17	48497322	C	T	12	2	14	0.857143	0.564591	0.5	0.619394	0.961539	0.790466	TRUE	DPRX
431	rs78375075	chr1	244299756	C	G	2	10	12	0.166667	0.564591	0	0.855947	0.988594	0.922271	TRUE	DPRX
432	rs78431470	chr7	92695756	G	T	42	2	44	0.954545	0.564591	1	0.0446094	0.443095	0.243852	FALSE	DPRX
433	rs7849759	chr9	135205276	T	C	2	12	14	0.142857	0.564591	0	0.827937	0.986814	0.907376	TRUE	DPRX
434	rs79390005	chr12	103925520	G	A	16	4	20	0.8	0.564591	0.666667	0.426635	0.824746	0.62569	FALSE	DPRX
435	rs79538952	chr18	77058167	C	G	6	4	10	0.6	0.564591	1	0.0033133	0.0647875	0.0340504	TRUE	DPRX
436	rs79589176	chr14	102777952	G	A	2	10	12	0.166667	0.564591	1	0.000986031	0.00974679	0.00536641	TRUE	DPRX
437	rs79612664	chr4	139177748	C	A	10	2	12	0.833333	0.564591	1	0.011903	0.23797	0.124936	TRUE	DPRX
438	rs7974948	chr12	98567179	A	G	8	6	14	0.571429	0.564591	1	0.00556437	0.0399149	0.0227397	TRUE	DPRX
439	rs8039105	chr15	62066886	C	T	2	16	18	0.111111	0.564591	0	0.802237	0.984132	0.893184	TRUE	DPRX
440	rs8044	chr19	49150749	T	G	20	2	22	0.909091	0.564591	1	0.0273997	0.322002	0.174701	TRUE	DPRX
441	rs8046707	chr16	30904912	G	A	6	8	14	0.428571	0.564591	0	0.963886	0.997348	0.980617	TRUE	DPRX
442	rs8055642	chr16	53503669	A	G	2	8	10	0.2	0.564591	0.5	0.0889701	0.526624	0.307797	FALSE	DPRX
443	rs8077860	chr17	48107973	G	A	18	8	26	0.692308	0.564591	1	0.0104498	0.0497015	0.0300757	TRUE	DPRX
444	rs8103849	chr19	4909617	C	G	10	2	12	0.833333	0.564591	0.5	0.561301	0.948856	0.755078	FALSE	DPRX
445	rs8106472	chr19	29217824	T	C	2	16	18	0.111111	0.564591	0	0.802237	0.984132	0.893184	TRUE	DPRX
446	rs8109493	chr19	14493120	T	C	10	2	12	0.833333	0.564591	1	0.011903	0.23797	0.124936	TRUE	DPRX
447	rs8129985	chr21	45308941	T	C	2	16	18	0.111111	0.564591	0	0.802237	0.984132	0.893184	TRUE	DPRX
448	rs8140986	chr22	37560833	A	C	4	12	16	0.25	0.564591	0.5	0.134443	0.528257	0.33135	FALSE	DPRX
449	rs8141959	chr22	19150436	C	G	6	4	10	0.6	0.564591	0.666667	0.225278	0.712964	0.469121	FALSE	DPRX
450	rs857231	chr14	98069625	G	C	4	8	12	0.333333	0.564591	1	0.00368998	0.0163821	0.0100361	TRUE	DPRX
451	rs864503	chr12	124505354	C	T	6	6	12	0.5	0.564591	1	0.00442501	0.0341771	0.019301	TRUE	DPRX
452	rs885675	chr17	19004360	G	C	16	4	20	0.8	0.564591	0.8	0.277057	0.73619	0.506624	FALSE	DPRX
453	rs894287	chr21	42375147	C	G	4	16	20	0.2	0.564591	0	0.900472	0.99014	0.945306	TRUE	DPRX
454	rs899646	chrX	15270071	T	C	8	2	10	0.8	0.564591	1	0.0113642	0.216439	0.113901	TRUE	DPRX
455	rs929881	chr16	74774527	G	A	2	8	10	0.2	0.564591	0.5	0.0889701	0.526624	0.307797	FALSE	DPRX
456	rs930392	chr16	30183519	A	G	14	8	22	0.636364	0.564591	0.333333	0.611645	0.900958	0.756301	TRUE	DPRX
457	rs9309013	chr2	37672167	A	G	10	4	14	0.714286	0.564591	0	0.988194	0.998918	0.993556	TRUE	DPRX
458	rs946127	chr13	112097289	C	G	6	6	12	0.5	0.564591	1	0.00442501	0.0341771	0.019301	TRUE	DPRX
459	rs950283	chr1	94101667	T	C	10	4	14	0.714286	0.564591	1	0.0103903	0.0828199	0.0466051	TRUE	DPRX
460	rs9538679	chr13	60397459	G	A	6	10	16	0.375	0.564591	1	0.00254161	0.0156645	0.00910308	TRUE	DPRX
461	rs9611116	chr22	39228047	A	G	6	8	14	0.428571	0.564591	0.5	0.237878	0.68091	0.459394	FALSE	DPRX
462	rs9626513	chr22	44679423	A	G	12	2	14	0.857143	0.564591	1	0.0154119	0.27594	0.145676	TRUE	DPRX
463	rs9834211	chr3	196016891	A	G	2	8	10	0.2	0.564591	0	0.863046	0.993228	0.928137	TRUE	DPRX
464	rs9852162	chr3	190911596	C	T	12	6	18	0.666667	0.564591	0	0.986461	0.996753	0.991607	TRUE	DPRX
465	rs9902512	chr17	49016912	C	G	6	16	22	0.272727	0.564591	0	0.933652	0.988221	0.960937	TRUE	DPRX
466	rs9909342	chr17	27325249	G	A	4	8	12	0.333333	0.564591	0.666667	0.0872755	0.465734	0.276505	FALSE	DPRX
467	rs9916692	chr17	57824035	C	T	6	6	12	0.5	0.564591	0	0.973156	0.997787	0.985472	TRUE	DPRX
468	rs9932922	chr16	71884275	T	C	2	10	12	0.166667	0.564591	0.5	0.0759179	0.468424	0.272171	FALSE	DPRX
469	rs9975531	chr21	38661111	C	G	2	14	16	0.125	0.564591	0	0.805035	0.987109	0.896072	TRUE	DPRX
470	rs9980304	chr21	36966669	T	C	16	2	18	0.888889	0.564591	1	0.0228467	0.301554	0.1622	TRUE	DPRX
471	rs9982175	chr21	41702316	T	C	22	2	24	0.916667	0.564591	1	0.0300701	0.334179	0.182124	TRUE	DPRX
[truncated: 47,809 more rows]

## Sheet: ASB number
TF_name	Number_of_ASB
ALX4	0
ARGFX	111
ARID5B	4
BAZ2A	15
BHLHA15	18
CEBPD	1
CEBPG	94
CPHXL	384
CPHXL2	75
CREB1	23
CRX	331
DLX3	2
DPRX	318
DUX4	28
DUXA	87
DUXB	87
E2F1	489
E2F3	24
EGR2	336
EGR3	0
EHF	65
ELF1	112
ELF2	106
ELF3	178
ELF4	308
ELF5	64
ELK1	225
ELK3	376
ELK4	479
ERF	68
ERG	265
ESR1	28
ETS1	19
ETS2	75
ETV1	171
ETV2	147
ETV3	296
ETV3L	0
ETV4	272
ETV5	204
ETV6	0
ETV7	500
FEV	217
FIGLA	25
FLI1	214
FOS	44
FOXA1	2
FOXA3	17
FOXI1	168
FOXJ2	210
FOXJ3	2
FOXL1	187
FOXO1	1
FOXQ1	235
GABPA	31
GABPB1	0
GATA1	8
GATA2	33
GATA3	238
GATA4	35
GCM1	399
GCM2	0
GLI2	257
GLI3-CL	327
GLI3-FL	128
GPBP1L1	0
HES7	0
HNF1A	14
HNF1B	46
HNF4A	104
HOXA1	11
HOXA10	62
HOXA11	94
HOXA13	5
HOXA2	57
HOXA3	30
HOXA4	5
HOXA5	20
HOXA9	51
HOXB13	85
HOXB2	156
HOXD12	25
HSF1	0
HSF4	0
IRF1	196
IRF3	326
IRF4	256
IRF5	282
IRF8	214
IRF9	332
ISX	68
JAZF1	37
KLF10	297
KLF12	471
KLF15	443
KLF16	419
KLF3	430
KLF4	267
KLF5	412
KLF6	132
KLF8	67
KLF9	315
LEUTX	30
LHX1	35
LHX2	17
LHX3	273
LHX4	119
LHX6	108
LHX8	1
MAX	483
MEF2A	338
MYB	56
MYC	27
MYOD1	551
MYSM1	0
NFATC3	109
NFATC4	116
NFIA	31
NFIB	10
NFIC	38
NFIX	110
NFKB1	432
NFYA	0
NFYC	18
NKX2-5	147
NR2F6	0
OTX2	25
PAX2	371
PAX6	73
PAX7	370
PAX8	53
PAX9	608
PBX4	1
PDX1	419
PITX1	16
POU2F1	2
POU5F1	49
PPARG	8
PRDM1	116
RFX1	2
RFX2	5
RFX3	135
RFX4	105
RFX5	39
RFX6	72
RFX8	0
RREB1	451
RXRA	9
SATB1	266
SATB2	185
SIX4	0
SIX5	0
SKIL	142
SMAD1	118
SMAD5	146
SOX10	142
SOX15	313
SOX17	282
SOX2	34
SOX4	231
SOX5	429
SOX6	358
SOX9	147
SP1	384
SP7	201
SPDEF	69
SPI1	103
SPIB	134
SPIC	122
SPZ1	221
STAT1	32
STAT3	175
STAT4	124
STAT5A	83
STAT5B	393
TBXT	392
TBR1	220
TBX21	4
TCF3	12
TEAD1	579
TEAD2	472
TEAD3	152
TEAD4	114
TFAP2A	332
TFAP2C	10
TFAP4	1
TLX1	396
TLX2	529
TLX3	290
TPRX1	158
TPRX2	127
USF1	9
VSX1	59
XBP1	35
YY1	36
ZBTB1	0
ZBTB33	0
ZBTB38	0
ZBTB7B	14
ZBTB9	0
ZGPAT	0
ZHX2	4
ZIC3	753
ZNF200	125
ZNF263	312
ZNF808	222

## Sheet: TF ASB
TF_name	ASB_info
SMAD1	rs1007568,rs10146759,rs10402946,rs10774481,rs11079572,rs112082219,rs11210564,rs112111321,rs112408368,rs1126134,rs114982608,rs115100968,rs11608885,rs116172436,rs11672724,rs11702480,rs117497971,rs11846963,rs12048160,rs12449272,rs12482648,rs12840549,rs12890225,rs12939520,rs138966521,rs1406813,rs1406815,rs141427453,rs145396941,rs1465425,rs148403815,rs149100456,rs17554547,rs17694108,rs184168539,rs1850…
ZBTB7B	rs112082219,rs117408860,rs16869688,rs2833275,rs2835589,rs2856968,rs4655064,rs57591949,rs62219136,rs6660782,rs7247811,rs7251331,rs74729083,rs76405423
IRF4	rs10176214,rs10403462,rs10407367,rs1056987,rs1065497,rs10773828,rs10774559,rs10876281,rs11108265,rs111258468,rs11135702,rs111413449,rs111592692,rs111622730,rs111623512,rs111796090,rs111975900,rs112017841,rs112111321,rs112114764,rs112146197,rs112219780,rs112266530,rs112304494,rs112359817,rs112408368,rs112502960,rs112852936,rs112946632,rs112986195,rs113340201,rs113368091,rs113471493,rs113663555,rs1…
YY1	rs1065497,rs10846594,rs112619223,rs113708270,rs11704744,rs12618057,rs1495276,rs1667605,rs16879539,rs17554547,rs183069399,rs184051871,rs1877173,rs189611932,rs191125037,rs201411586,rs2306941,rs2515621,rs2648593,rs28360848,rs28434767,rs368952081,rs372060761,rs372364310,rs373710116,rs4655064,rs55961512,rs57597951,rs61773957,rs61926301,rs6603805,rs675740,rs71514255,rs79822985,rs9313169,rs972856
PAX7	rs10060481,rs10089933,rs1009156,rs10094372,rs10136595,rs10146759,rs10176214,rs10225507,rs10238095,rs10281879,rs10415813,rs10417381,rs10424827,rs10482113,rs1065497,rs10749816,rs10752741,rs10773828,rs10842799,rs10854161,rs10859991,rs10915962,rs11022711,rs11075633,rs11084897,rs11090481,rs111252381,rs111527470,rs111699069,rs11170672,rs11205707,rs112087793,rs112111321,rs112119401,rs112359817,rs1124141…
DUXA	rs10044145,rs10111373,rs10133357,rs10402658,rs10423593,rs11160715,rs116714698,rs11702478,rs117184908,rs117499481,rs12220042,rs12482648,rs12675789,rs12692407,rs12698354,rs12922219,rs12951666,rs12977514,rs138030856,rs139433888,rs139849974,rs141427453,rs146374798,rs146606198,rs148125293,rs1511175,rs1530161,rs180718800,rs191872598,rs2238668,rs227249,rs233580,rs2429390,rs2429913,rs2643019,rs28360848,r…
TBR1	rs1007234,rs10407367,rs1054442,rs1056619,rs10741498,rs10774559,rs10799501,rs11020658,rs11046046,rs11078281,rs111261603,rs111308825,rs111606269,rs111622730,rs11169481,rs11170672,rs11172821,rs112114764,rs11216665,rs112215462,rs112600621,rs113340201,rs113368091,rs113708270,rs114982608,rs11537648,rs11642660,rs116738729,rs11711695,rs11711894,rs11771810,rs118039764,rs11865749,rs11972454,rs12060237,rs12…
FOS	rs11079299,rs111543816,rs111922015,rs112600262,rs11764740,rs12367873,rs12590590,rs1267582,rs13266450,rs1418584,rs143874608,rs144137570,rs144866556,rs146094712,rs149956528,rs16853551,rs181541,rs181668862,rs1853143,rs187538887,rs190919006,rs201899048,rs2693658,rs3179285,rs3742250,rs375542896,rs4655064,rs4766460,rs4955420,rs61080184,rs62609614,rs67753568,rs7113829,rs72873390,rs7497457,rs7580658,rs75…
FLI1	rs10225507,rs10407772,rs10415908,rs10417381,rs1079357,rs11039231,rs11160833,rs111616119,rs111622730,rs11170672,rs111819396,rs111863368,rs11205707,rs112061868,rs112137728,rs112137966,rs112215462,rs11240504,rs112619223,rs1131925,rs113210177,rs113785522,rs114747971,rs11542411,rs11576019,rs116000286,rs11670864,rs116990358,rs11717031,rs117549427,rs117659737,rs117848378,rs11786004,rs118035787,rs1181776…
ZNF263	rs10409437,rs10410956,rs10411508,rs10753872,rs10908454,rs10915962,rs10953065,rs11042227,rs11120964,rs11126836,rs111308825,rs111440307,rs111527470,rs111561531,rs11170672,rs112008860,rs11205707,rs112066618,rs112087793,rs112108916,rs112137728,rs112359817,rs11240501,rs11240504,rs112619223,rs113172457,rs1131925,rs113290987,rs113785522,rs113888803,rs1139132,rs114382205,rs114625568,rs1149619,rs116000286…
SPIB	rs10157498,rs10160792,rs1040402,rs1079357,rs111308825,rs111702114,rs11170672,rs112111321,rs112359817,rs113742022,rs114729946,rs114829951,rs11542411,rs11588920,rs11650304,rs116869463,rs117009988,rs117142089,rs1187718,rs12047622,rs12095061,rs12126474,rs12298179,rs12409763,rs12949115,rs12983068,rs13000317,rs138595457,rs139949586,rs141427453,rs144118207,rs145396941,rs149172009,rs149767434,rs1549143,r…
ZHX2	rs369611767,rs4647718,rs4784646,rs7647918
NFYC	rs10211067,rs111350651,rs111725982,rs1228814,rs12302895,rs199657801,rs219656,rs2959228,rs35201266,rs3755425,rs56380654,rs62335971,rs6989517,rs75329953,rs757693,rs79170781,rs858519,rs968567
TCF3	rs113208795,rs11765474,rs12069675,rs1925082,rs2162566,rs2869774,rs313184,rs34084401,rs4917559,rs60957616,rs62269065,rs74892525
TBX21	rs12104935,rs3861941,rs8061228,rs9845058
RFX3	rs10098538,rs10146759,rs10153315,rs10225507,rs10774481,rs10910455,rs11013409,rs11075998,rs11080327,rs11170672,rs1118001,rs112034319,rs11205707,rs11210564,rs112137728,rs114982608,rs116893322,rs116958755,rs11764740,rs117990130,rs12060237,rs12565220,rs125682,rs12592939,rs1260556,rs12625382,rs12757307,rs12939520,rs13092828,rs132793,rs13361707,rs137944554,rs138808588,rs140103307,rs141427453,rs14387460…
PBX4	rs134609
TLX3	rs10132732,rs1014257,rs10184871,rs10248248,rs10261267,rs10407367,rs1065497,rs10774559,rs10784480,rs10790766,rs1079357,rs11068058,rs11075674,rs11108265,rs111375471,rs111616119,rs111622730,rs11170672,rs112111321,rs112137728,rs112474011,rs11260822,rs112946632,rs113269073,rs113340201,rs113368091,rs113663555,rs113708270,rs113732836,rs113785522,rs113799953,rs115100968,rs11544472,rs11548434,rs115693910,…
SP7	rs10129265,rs1065497,rs10753870,rs10958707,rs11083461,rs11108265,rs111509424,rs111623512,rs111685837,rs11170672,rs111741904,rs11177642,rs111796090,rs112137728,rs112619223,rs113210177,rs113368091,rs113475910,rs113641964,rs113732836,rs113844048,rs113908274,rs114747971,rs11542411,rs115531303,rs11555541,rs116287156,rs11642660,rs116539897,rs11672724,rs117161313,rs117219709,rs117606993,rs117659737,rs11…
NFATC3	rs10238095,rs10406222,rs10482113,rs1051750,rs1065497,rs1072669,rs10842799,rs111908662,rs11205707,rs112619223,rs113532639,rs113540737,rs113799953,rs11465228,rs114829951,rs115131679,rs11548434,rs115892653,rs117022703,rs11707314,rs12914565,rs13374999,rs13399063,rs1383116,rs138808588,rs142375387,rs1439619,rs144690693,rs145188743,rs145396941,rs146288259,rs147621681,rs149207248,rs1760039,rs1776178,rs17…
BAZ2A	rs10426850,rs112355147,rs146506777,rs147113051,rs188751810,rs189308601,rs2150413,rs2222960,rs2231569,rs2835589,rs35048950,rs4828466,rs5968443,rs77389705,rs8130320
TEAD3	rs10160792,rs10244001,rs1033385,rs10402774,rs10407367,rs1044570,rs1055218,rs1065497,rs1075368,rs10850358,rs11108265,rs111355210,rs111359237,rs111796090,rs112111321,rs112329580,rs112428462,rs112587865,rs112790486,rs113368091,rs113392526,rs113708270,rs113883580,rs1149484,rs11576163,rs11608885,rs11622425,rs117219709,rs117659737,rs11819452,rs11868888,rs1228814,rs12353145,rs12459642,rs12534832,rs12819…
ARGFX	rs10043083,rs10773828,rs11121691,rs111308825,rs11205707,rs112652199,rs112835547,rs112946632,rs113338846,rs113340201,rs113368091,rs11576019,rs11617995,rs11642660,rs118025671,rs11913631,rs12403036,rs12409704,rs12430462,rs12541494,rs12567442,rs1274524,rs12889089,rs12953299,rs13003268,rs13422401,rs138808588,rs141580099,rs146605240,rs148382115,rs149688477,rs1547239,rs1632169,rs1765003,rs1783049,rs1788…
SOX9	rs10184871,rs10199199,rs10445831,rs10765765,rs10766359,rs10767811,rs11023312,rs11080126,rs11114096,rs11118986,rs111513320,rs111623512,rs111741904,rs112619223,rs112652199,rs113340201,rs113584314,rs113611728,rs113720198,rs115131679,rs115531303,rs11555541,rs115746499,rs11578994,rs11608885,rs11655184,rs11667883,rs11673626,rs116904515,rs11703043,rs117245067,rs117990130,rs1199458,rs12300350,rs12800503,…
GLI2	rs10176214,rs10417381,rs10419269,rs1054442,rs10773828,rs10876281,rs10888977,rs10894200,rs10917160,rs11083617,rs11108265,rs111252381,rs111882537,rs112111321,rs112502960,rs11265582,rs112946632,rs1132802,rs113340201,rs113363891,rs113368091,rs113373250,rs113392526,rs1135215,rs113635549,rs113655107,rs113708270,rs114104766,rs11528908,rs11549412,rs115628954,rs11673518,rs116795990,rs117022703,rs117506586…
SPZ1	rs10157498,rs10211067,rs10416817,rs10417381,rs10420277,rs1065497,rs10765543,rs1077420,rs10915962,rs11075664,rs111308825,rs112299555,rs112359817,rs112428462,rs112502960,rs112524533,rs112619223,rs112946632,rs113300592,rs113368091,rs113492636,rs113663555,rs113785522,rs114982608,rs11555541,rs115731330,rs11609751,rs11666494,rs1168666,rs116942340,rs117982737,rs11829669,rs11853396,rs12060237,rs12113294,…
SPDEF	rs10160792,rs10225507,rs10411508,rs111252381,rs111308825,rs11205707,rs112087793,rs113554591,rs11536931,rs116000286,rs117650092,rs117659737,rs11837423,rs11878203,rs12430462,rs12535567,rs12982061,rs12985118,rs13044490,rs13095733,rs139079895,rs141427453,rs148654632,rs1500976,rs181372356,rs181591178,rs2168634,rs2269403,rs2377037,rs2505972,rs2604895,rs2791647,rs28921978,rs2990682,rs340838,rs34136596,r…
EHF	rs1009156,rs10407772,rs10416513,rs111308825,rs11160833,rs111937628,rs11205707,rs112137966,rs112359817,rs1125091,rs113888803,rs11542411,rs116000286,rs11878203,rs12035664,rs12582765,rs13316433,rs141427453,rs1511175,rs17554547,rs1760042,rs17834186,rs1831323,rs184588010,rs1860430,rs1870939,rs190490782,rs200410284,rs2274311,rs234109,rs2501078,rs3021319,rs34190715,rs34829483,rs35501398,rs3650,rs3742681…
TLX2	rs10039443,rs10083697,rs10091313,rs10134381,rs10137489,rs10146759,rs10184871,rs10199199,rs10211067,rs10225507,rs10278001,rs1043361,rs1065497,rs10773828,rs10789281,rs10838396,rs10846588,rs10864990,rs10876530,rs10913203,rs10934858,rs10951937,rs11049610,rs11063710,rs1108259,rs11108265,rs111484016,rs111509424,rs111561531,rs111606269,rs111699095,rs11170672,rs111741904,rs111752251,rs111796090,rs1118613…
SATB2	rs1014297,rs10184871,rs10407367,rs10425598,rs1054442,rs111252381,rs111320423,rs111509107,rs111622730,rs112114764,rs112299555,rs112359817,rs112765506,rs112770825,rs112835547,rs112978338,rs113340201,rs113368091,rs113369180,rs113554591,rs113708270,rs113732836,rs114093789,rs1149608,rs11549412,rs115842617,rs11613417,rs11641847,rs11642660,rs11656206,rs116890232,rs11711894,rs117219709,rs117659737,rs1176…
STAT5B	rs1011701,rs10173538,rs10176214,rs10281879,rs10407367,rs10425598,rs10493037,rs10773828,rs10774559,rs10788975,rs10849268,rs10849397,rs10849860,rs10881583,rs10894030,rs11108265,rs111311750,rs111320423,rs111344771,rs11170672,rs111722176,rs111819396,rs111861376,rs111960388,rs112114764,rs112137728,rs112359817,rs112408368,rs112422823,rs112731206,rs113172457,rs1132802,rs113363891,rs113368091,rs113537348…
PITX1	rs113340201,rs113708952,rs1233444,rs13050837,rs28654239,rs3756662,rs41428545,rs56184201,rs57591949,rs58659337,rs61776480,rs73046449,rs7559150,rs75851226,rs77218797,rs9309632
IRF5	rs1014257,rs10407367,rs1054442,rs1056987,rs1065497,rs10773828,rs1079357,rs10876281,rs10880822,rs10958707,rs10985845,rs11108265,rs111258468,rs111298868,rs111311628,rs111320423,rs111729303,rs111796090,rs112114764,rs112137728,rs112408368,rs1124669,rs112541840,rs112946632,rs112986195,rs1132802,rs113313091,rs113340201,rs113368091,rs113392526,rs113587479,rs113699868,rs113708270,rs113732836,rs1149484,rs…
CEBPD	rs8030996
TEAD2	rs10134231,rs10146759,rs10184871,rs10187354,rs10199199,rs10208406,rs10403294,rs1056441,rs1065497,rs10766359,rs10773828,rs1077806,rs1079357,rs10861574,rs10864790,rs10865739,rs10883986,rs10899095,rs11061796,rs11066658,rs1108681,rs1109362,rs11108265,rs111252381,rs111261603,rs11127454,rs111308825,rs111509424,rs111561531,rs111606269,rs11170672,rs111716534,rs111741904,rs11176344,rs11180823,rs111951693,…
KLF10	rs10225507,rs1034421,rs10407367,rs10421558,rs10421915,rs10773828,rs10790324,rs10849397,rs10870468,rs10925149,rs10927794,rs11086052,rs111334531,rs111606269,rs112422823,rs112502960,rs1125790,rs112587865,rs112803404,rs112946632,rs113250937,rs113340201,rs113368091,rs113481265,rs1136165,rs113632030,rs113708270,rs113778654,rs114982608,rs11540278,rs11549412,rs115749686,rs11602759,rs11615859,rs1167704,rs…
FOXL1	rs10225507,rs10405317,rs10419269,rs1055218,rs1065497,rs10773828,rs10796867,rs10883986,rs10888977,rs10899095,rs11045,rs11048709,rs11069820,rs11071888,rs11083857,rs11089627,rs11108265,rs111669088,rs11170672,rs11228324,rs11228496,rs11237599,rs112408368,rs112835547,rs112946632,rs114491840,rs1145152,rs1149484,rs115100968,rs116795990,rs117022703,rs117219709,rs117650728,rs11833072,rs11837109,rs12148825,…
TFAP2C	rs10783607,rs11187167,rs199837312,rs373361927,rs57305384,rs76104771,rs768528,rs8030996,rs9574593,rs9610374
NKX2-5	rs10063290,rs10132281,rs10225507,rs1041420,rs10416373,rs1107481,rs11089068,rs11108265,rs111344771,rs111741904,rs112619223,rs112652199,rs112749718,rs113247640,rs113369180,rs115131679,rs11588950,rs115948179,rs1167080,rs11677667,rs117009988,rs117049096,rs117219709,rs117388367,rs11770695,rs118102968,rs11908910,rs11983200,rs1199729,rs12151059,rs12306,rs12445996,rs12473408,rs12474408,rs12614581,rs12656…
HNF1A	rs12547014,rs12708946,rs13067010,rs201438665,rs2071424,rs374978858,rs3773747,rs4892652,rs6727102,rs7113829,rs7292997,rs7579014,rs77670834,rs79382647
POU2F1	rs2402616,rs7640441
ELK3	rs1003619,rs10063290,rs10146759,rs10208406,rs10211067,rs10225507,rs10281879,rs10405424,rs10482724,rs1065497,rs10766359,rs10773828,rs11073920,rs11078408,rs1108341,rs11108265,rs111311750,rs111320423,rs111509424,rs111561531,rs111622730,rs11170672,rs11180823,rs112087793,rs112096670,rs112114764,rs112137728,rs112175201,rs112215462,rs11240504,rs112428462,rs112619223,rs112796256,rs112938132,rs112946632,r…
ELF3	rs10146759,rs10199199,rs10221974,rs1035328,rs10424906,rs1065497,rs10800138,rs10958707,rs11080126,rs11108265,rs111561531,rs111699095,rs11180823,rs11205707,rs11235674,rs112359817,rs112619223,rs112845275,rs112986195,rs1132802,rs113368091,rs115442764,rs115531303,rs11555046,rs11571378,rs11615019,rs11676235,rs117079227,rs117219709,rs117659737,rs117990130,rs11865749,rs12086240,rs12118515,rs12126422,rs12…
PAX9	rs1008410,rs10135782,rs10146759,rs10149496,rs10184871,rs10199199,rs10204951,rs10208284,rs10211067,rs10225507,rs10230188,rs10240006,rs10248960,rs10255425,rs1051750,rs1056987,rs1065497,rs10737259,rs10766359,rs10773571,rs10773828,rs1078398,rs10784721,rs10808118,rs10832833,rs10850644,rs10852140,rs10859991,rs10876229,rs10889524,rs10914472,rs10927794,rs10933509,rs10951937,rs11037860,rs11048705,rs110610…
KLF5	rs10047070,rs10082400,rs1009156,rs10094372,rs10136730,rs10160792,rs10168288,rs10176214,rs10176461,rs10185688,rs10211067,rs1021735,rs10240006,rs10407367,rs10417381,rs10421292,rs1047616,rs1051750,rs10750417,rs10760549,rs10773828,rs10808118,rs10838316,rs10858256,rs10893924,rs10903358,rs10911205,rs10951937,rs10953248,rs11057261,rs111447543,rs11145867,rs11150590,rs111509424,rs111543816,rs11160836,rs11…
RFX5	rs10042415,rs10894030,rs11111979,rs112369972,rs114471912,rs117064964,rs12044509,rs12212193,rs12731882,rs1573413,rs1688601,rs185643045,rs1861956,rs2436865,rs281391,rs2836912,rs28657787,rs2878967,rs3091497,rs3101339,rs34774661,rs373542020,rs3745648,rs3782553,rs4655064,rs4968207,rs4980505,rs56119017,rs56166765,rs58424886,rs5906282,rs6031849,rs67376518,rs6989517,rs705533,rs75088972,rs7579996,rs800911…
MEF2A	rs10095654,rs10126892,rs10184871,rs1018767,rs10221832,rs10246160,rs10411250,rs10421916,rs10466531,rs10482113,rs10808118,rs10866541,rs10909831,rs10917002,rs10934858,rs11061352,rs11061796,rs11068420,rs1107481,rs11079874,rs11109594,rs11121412,rs11136248,rs111561531,rs11157835,rs111674074,rs111699095,rs111741904,rs111752251,rs112174007,rs112252372,rs11248955,rs112711134,rs112835547,rs112972043,rs1133…
ERG	rs10175156,rs10198822,rs1056987,rs1065497,rs10773828,rs10802890,rs10849067,rs10864640,rs10877887,rs10915194,rs11024297,rs11048709,rs11057297,rs11108265,rs11125180,rs111308825,rs111410535,rs111615417,rs11170672,rs111863368,rs112111321,rs112114764,rs112658366,rs112860306,rs1132802,rs113340201,rs113368091,rs113582127,rs113708270,rs113785522,rs1149484,rs115157601,rs115378447,rs115669754,rs11636934,rs…
DLX3	rs10226230,rs1401117
EGR2	rs1004199,rs10157498,rs10176214,rs10415908,rs10445298,rs10501666,rs1051750,rs10772517,rs10915962,rs11078408,rs11114052,rs11120118,rs111308825,rs111440307,rs111527470,rs111538756,rs111561531,rs11170672,rs111815979,rs112005261,rs11205707,rs112087793,rs112111321,rs112137728,rs112215462,rs112359817,rs112503392,rs112619223,rs112872285,rs113059278,rs113340490,rs113369180,rs113785522,rs113877624,rs11438…
FOXQ1	rs10016374,rs10132732,rs10146759,rs10176214,rs10281879,rs10417381,rs10773828,rs10799501,rs10849559,rs10863914,rs11025569,rs1109726,rs11108265,rs111606269,rs111685837,rs11170672,rs111786665,rs111952154,rs11205707,rs112111321,rs112114764,rs11227624,rs112359817,rs112428462,rs112474011,rs112675621,rs112946632,rs113009839,rs1132802,rs113368091,rs113708270,rs113732836,rs114982608,rs11549412,rs11587364,…
HNF1B	rs1029731,rs10745511,rs10767634,rs112705404,rs1128817,rs112900094,rs11614212,rs11764740,rs1251594,rs12574404,rs1482286,rs182331691,rs184035396,rs189197,rs189900120,rs190452516,rs1939661,rs201438665,rs2337386,rs2777898,rs369636236,rs4076763,rs42896,rs4892652,rs5912576,rs6427589,rs6575525,rs6727102,rs7032,rs703860,rs7113829,rs7292997,rs7319441,rs74063273,rs75393780,rs75546751,rs7562173,rs76007244,r…
ZIC3	rs10042963,rs10129715,rs10134767,rs10140184,rs10146759,rs10184871,rs10211067,rs10225507,rs10229375,rs10260031,rs10274554,rs10409796,rs10415717,rs10425598,rs1045046,rs1047616,rs10484030,rs1065497,rs10748298,rs10753538,rs10754940,rs1076991,rs10773828,rs10774339,rs10792445,rs1079357,rs10799447,rs10808118,rs10849559,rs10854161,rs10892354,rs10916899,rs10951937,rs10951944,rs11022711,rs11046046,rs110721…
PAX2	rs10198822,rs10252238,rs10407367,rs10425598,rs1055218,rs1065497,rs10741812,rs10773828,rs10782758,rs10849559,rs10853781,rs10889524,rs10902431,rs11077947,rs11108265,rs11124084,rs111252381,rs111320423,rs111521549,rs111616119,rs111685837,rs11169480,rs11170672,rs11175885,rs111786665,rs111968669,rs112114764,rs112270784,rs112451165,rs112790486,rs112946632,rs1132802,rs113368091,rs113392526,rs113545716,rs…
DUXB	rs10146759,rs10416817,rs10915962,rs11071839,rs111344771,rs112521723,rs112749718,rs113262211,rs114858913,rs11614332,rs11669069,rs117088554,rs11748139,rs117990130,rs11829669,rs11865749,rs12150153,rs12205520,rs12445440,rs12829456,rs12981348,rs13005175,rs138011563,rs138595457,rs139848472,rs145928003,rs149050521,rs151247732,rs17345153,rs17754896,rs1776178,rs17882748,rs185677744,rs1862475,rs1955368,rs2…
FOXI1	rs10161050,rs10229230,rs10249362,rs10252238,rs10254777,rs10849558,rs10850358,rs10917332,rs11108265,rs111320423,rs111534123,rs111651648,rs111819396,rs11205707,rs112087793,rs112215462,rs112408368,rs11249792,rs112652199,rs112945321,rs112986195,rs1132802,rs113368091,rs113587479,rs113628078,rs113708270,rs113732836,rs1149484,rs114982608,rs116431230,rs11671503,rs117022703,rs117659737,rs117861539,rs11867…
NFIC	rs1022798,rs10233311,rs10406888,rs10792839,rs10928478,rs11240504,rs114188545,rs114982608,rs115482291,rs11577142,rs12472445,rs12691850,rs146900557,rs1497122,rs150374231,rs1525006,rs1998815,rs2260894,rs28432054,rs28565312,rs367743592,rs459137,rs4766460,rs5946052,rs62230185,rs6426546,rs6442130,rs6469116,rs6501857,rs6511284,rs655530,rs66796860,rs6967482,rs733164,rs7881747,rs79630679,rs8136969,rs99025…
FOXJ3	rs375177151,rs76083743
IRF1	rs10043386,rs1007106,rs10176214,rs10252922,rs10402946,rs10406613,rs10881583,rs10898153,rs11030214,rs11114583,rs11146552,rs112416021,rs113172457,rs113340201,rs113785522,rs114982608,rs115602248,rs115731330,rs11632076,rs11669500,rs117408699,rs11766297,rs11782589,rs117990130,rs11856468,rs11928090,rs11973211,rs12476291,rs12549737,rs12580705,rs12593739,rs12609913,rs12647127,rs12671604,rs12742403,rs1274…
MYC	rs12747275,rs13074291,rs151024482,rs1713074,rs1859769,rs2486009,rs2494391,rs2693672,rs368453449,rs373024213,rs3809048,rs457024,rs4637560,rs4655064,rs5919312,rs61926301,rs67918869,rs71627568,rs7173047,rs7212351,rs7236272,rs75201060,rs76016560,rs769440,rs77083233,rs79424432,rs932816
LHX2	rs1065497,rs111685837,rs112619223,rs114982608,rs1532770,rs1868101,rs2351704,rs28434767,rs3011482,rs34197876,rs369569203,rs370533692,rs3759579,rs4955420,rs73691586,rs75643255,rs76016560
STAT4	rs10407367,rs10425598,rs1065497,rs10773828,rs1079357,rs11108265,rs111252381,rs111320423,rs111355210,rs112114764,rs112252372,rs11233,rs112359817,rs1124669,rs112619223,rs112946632,rs112986195,rs1132802,rs113368091,rs1149608,rs114982608,rs11549412,rs11608885,rs117022703,rs117218125,rs12497539,rs12609305,rs12820345,rs1319915,rs13233679,rs13424690,rs138808588,rs138986173,rs1406815,rs140763106,rs142706…
ETV1	rs10157498,rs10252238,rs10402946,rs10753357,rs1079357,rs10853785,rs10907384,rs11083758,rs11084942,rs111308825,rs111440307,rs11205707,rs112087793,rs112146197,rs112215462,rs112521723,rs112997568,rs113259363,rs113400343,rs113785522,rs116000286,rs11649307,rs116869463,rs11696000,rs117650092,rs12027202,rs12093589,rs12118515,rs12131882,rs12132916,rs12461951,rs12462901,rs1257271,rs12622055,rs12805159,rs1…
MAX	rs1001821,rs1009156,rs10094587,rs10119215,rs10160792,rs1020042,rs10203039,rs10211067,rs10233311,rs10261267,rs10418560,rs10457082,rs10468043,rs10482724,rs10483475,rs10492519,rs10513656,rs10750417,rs10771350,rs1079357,rs10843539,rs10849558,rs10853781,rs10908454,rs10910232,rs11032374,rs11032380,rs11072728,rs111308825,rs111311750,rs111447543,rs111543816,rs11160836,rs11185148,rs112047677,rs112111321,r…
IRF3	rs1007881,rs10094372,rs1013153,rs10160792,rs10176214,rs10197990,rs10211067,rs10407367,rs10413237,rs10414308,rs10417381,rs1051750,rs10773828,rs10835866,rs10953175,rs11075664,rs111344771,rs111398992,rs11160833,rs11163404,rs111796090,rs111815979,rs11185676,rs111968669,rs11209163,rs112121758,rs112146197,rs112215462,rs112359817,rs112428462,rs112502960,rs112619223,rs112749718,rs113210177,rs113368091,rs…
SOX4	rs10071514,rs10146759,rs10157498,rs10417381,rs1051750,rs10764922,rs10898153,rs10902226,rs10928478,rs111398992,rs111534123,rs111742586,rs111968669,rs11209163,rs112137966,rs112226678,rs112359817,rs112374479,rs112408368,rs112450193,rs112619223,rs112860482,rs112986195,rs113340201,rs113368091,rs113554591,rs113710419,rs114382205,rs1149484,rs114982608,rs115049285,rs11549412,rs11571378,rs11576019,rs11596…
CEBPG	rs1005565,rs10230610,rs10454860,rs10803961,rs113037117,rs113239956,rs12330648,rs12473347,rs12624686,rs12734523,rs13044668,rs1330718,rs1388941,rs139717021,rs148506022,rs1533800,rs1629783,rs1634605,rs16838414,rs16856737,rs1749327,rs17525614,rs1791371,rs183603528,rs189714781,rs192432092,rs1966530,rs1984069,rs2143491,rs2150284,rs2281004,rs2403172,rs2436608,rs2620073,rs2823602,rs282571,rs28546995,rs30…
HOXA1	rs11587527,rs116795990,rs11764740,rs12757307,rs1341154,rs17417049,rs2288897,rs6673093,rs74140258,rs75921867,rs7796973
LHX6	rs10047957,rs10153315,rs1033905,rs10417381,rs111622730,rs11170672,rs11171710,rs112984464,rs113340201,rs113368091,rs114134833,rs114982608,rs11631785,rs117219709,rs117548969,rs11765421,rs117680626,rs118150194,rs12027391,rs12305014,rs12370269,rs12534938,rs12579420,rs1282970,rs12949411,rs13054065,rs13361707,rs1383116,rs138808588,rs141936124,rs144010570,rs144533217,rs150216250,rs151248695,rs1514675,rs…
IRF9	rs10133357,rs10278152,rs10407367,rs10421915,rs10473055,rs1054442,rs1055218,rs1066390,rs10754940,rs10773828,rs10849397,rs10849431,rs10849558,rs10850563,rs11108265,rs111252381,rs111534123,rs111543816,rs111861376,rs112004805,rs11205707,rs112359817,rs112428462,rs112684580,rs112756312,rs112946632,rs112986195,rs113037555,rs1132802,rs113368091,rs113392526,rs113447803,rs113646093,rs113708270,rs113711135,…
E2F1	rs1006910,rs10136700,rs1016107,rs10184871,rs10211067,rs10225507,rs1035328,rs10415924,rs10425598,rs10482113,rs1065497,rs10766359,rs10766658,rs10858417,rs10859991,rs10877897,rs10909977,rs10911015,rs11020767,rs11048709,rs11063710,rs11076717,rs11102484,rs11120794,rs111261603,rs111308825,rs111447543,rs111509424,rs111561531,rs111606269,rs111622730,rs11164880,rs11170672,rs111741904,rs11175197,rs11179609…
GATA3	rs10013573,rs10060195,rs1007210,rs10410797,rs10761187,rs10787978,rs10807150,rs10810649,rs10828247,rs10850766,rs10862406,rs10910868,rs10916146,rs10925299,rs10929609,rs10929692,rs10958707,rs11055132,rs11078770,rs11134877,rs11145867,rs11145954,rs11146419,rs111482467,rs111543816,rs11249203,rs112639882,rs11265891,rs112947658,rs113264846,rs113665144,rs113976679,rs114150764,rs1152887,rs11606393,rs116088…
KLF15	rs1004379,rs10089299,rs10105019,rs10146759,rs10204779,rs10208406,rs10211067,rs10225507,rs10230188,rs10274,rs10281879,rs10405269,rs10405424,rs10407367,rs10420569,rs10425598,rs10439322,rs1056987,rs1065497,rs10766359,rs10773828,rs10782758,rs10790241,rs10843871,rs10898864,rs10951937,rs11020767,rs11108265,rs11121233,rs11124201,rs111440307,rs111447543,rs111480490,rs1115050,rs11150836,rs111509424,rs1116…
GLI3-FL	rs10753538,rs10774481,rs10908482,rs10915194,rs1108064,rs11108265,rs111308825,rs111999329,rs112017841,rs11205707,rs112111321,rs112256708,rs112946632,rs112947658,rs113340201,rs113368091,rs113908274,rs114982608,rs11639040,rs11642660,rs117022703,rs11711695,rs117469893,rs11863729,rs12060237,rs12113294,rs12742403,rs12883151,rs12949115,rs12957551,rs12972800,rs12984041,rs1383116,rs138808588,rs139799950,r…
SOX15	rs10107447,rs10146759,rs10184871,rs10199199,rs10211067,rs10405424,rs10413786,rs10420356,rs1056987,rs1065497,rs10794316,rs1109755,rs11108265,rs111509424,rs111551856,rs11170672,rs111863368,rs111968669,rs112087793,rs112137728,rs112215462,rs112359817,rs112514815,rs112587865,rs11259990,rs112619223,rs112749718,rs112790486,rs112946632,rs112983956,rs112997568,rs1132802,rs113282701,rs113785522,rs114382205…
CRX	rs1001745,rs1009156,rs10132281,rs1022312,rs10241282,rs10252238,rs1029391,rs1031507,rs1036932,rs10430272,rs10469607,rs10498527,rs10514505,rs10518707,rs10744008,rs10768024,rs10788883,rs10797659,rs10875976,rs10915962,rs11032380,rs11042227,rs11107349,rs11119883,rs11160833,rs11170764,rs112299555,rs112498700,rs1126045,rs112991950,rs1130664,rs1132802,rs114188545,rs114667483,rs11528908,rs1154384,rs115818…
JAZF1	rs10423073,rs10854296,rs11635626,rs11672724,rs11739543,rs12185846,rs125682,rs12949115,rs12983093,rs141427453,rs146933524,rs148319662,rs1547239,rs181105515,rs2299813,rs2445824,rs2833796,rs2834271,rs2856968,rs3007751,rs3809596,rs3812142,rs3843754,rs453853,rs4787645,rs59503823,rs62101883,rs62108966,rs62226377,rs7215902,rs74636811,rs75291665,rs79378930,rs8103162,rs8106991,rs8107647,rs855612
TPRX2	rs1008410,rs1009156,rs10176214,rs10225507,rs10417381,rs1050099,rs1065497,rs10877887,rs11024076,rs111297484,rs111362998,rs111861376,rs11205707,rs112111321,rs112492380,rs112652199,rs114170095,rs117022703,rs12027747,rs12064827,rs12067422,rs12096831,rs12147182,rs12306,rs12440447,rs12482648,rs12597210,rs1262237,rs12713688,rs12850092,rs12911019,rs12940577,rs12945537,rs1328363,rs138151712,rs139799950,rs…
RFX1	rs4649310,rs9845144
HOXA13	rs12040904,rs12534448,rs183257205,rs2851501,rs3014712
TEAD1	rs1005447,rs10103941,rs10162825,rs10165552,rs10170555,rs10184871,rs10199199,rs10202390,rs10208406,rs10211067,rs10225507,rs1024428,rs10415924,rs1055218,rs1056987,rs1065497,rs10745511,rs10753365,rs10766359,rs10773828,rs10774559,rs10777153,rs10808118,rs10840178,rs10852836,rs10894030,rs10920183,rs10951937,rs11020767,rs11062386,rs11079750,rs11079929,rs11083857,rs1108681,rs11087484,rs11108265,rs1111215…
NFIA	rs11677932,rs12757307,rs12801550,rs1338317,rs147121942,rs17796529,rs1873209,rs189654608,rs2110977,rs28516905,rs34652325,rs35060706,rs4820294,rs4886467,rs57468900,rs60270063,rs605449,rs62459585,rs6429714,rs6436776,rs6469116,rs655530,rs66460104,rs7581442,rs7618733,rs78814609,rs79253201,rs8007838,rs8103974,rs9616853,rs9902512
DPRX	rs1001179,rs10042852,rs10071514,rs10142497,rs10146759,rs10176214,rs10202094,rs10204724,rs10272990,rs10402774,rs10417381,rs1051750,rs1066390,rs1079455,rs10800284,rs10819783,rs10849558,rs10870133,rs10911205,rs10915962,rs10917049,rs11043076,rs11055128,rs11057297,rs11057888,rs11083857,rs111344771,rs111771036,rs112034678,rs112502960,rs112656571,rs113304510,rs113340201,rs113368091,rs113485822,rs1145332…
ETV5	rs10146759,rs10182437,rs10208406,rs10211067,rs10225507,rs10253208,rs10445831,rs10766359,rs10774619,rs10775022,rs10894835,rs11061352,rs111344771,rs111367366,rs111509424,rs111606269,rs111819396,rs111968669,rs112020336,rs112087793,rs11209163,rs112137728,rs112146197,rs112502960,rs112619223,rs112652199,rs112997568,rs113340201,rs113570934,rs113708270,rs113787169,rs11534428,rs11537639,rs11542411,rs11642…
SPIC	rs1009156,rs10145275,rs10416513,rs10431386,rs10920230,rs11072196,rs111308825,rs112137728,rs11240504,rs112558212,rs113172457,rs1132802,rs11548478,rs115669754,rs11625269,rs116255351,rs11670757,rs118118481,rs12025572,rs12035664,rs12057222,rs12104935,rs12125682,rs12149160,rs1217398,rs12301925,rs12452513,rs12730813,rs12870592,rs12905855,rs12971793,rs13242357,rs141181905,rs142385872,rs149770651,rs15666…
ETS2	rs10866837,rs1105203,rs111440307,rs112200621,rs114795801,rs11690893,rs118041059,rs118047999,rs11868888,rs12043492,rs12113294,rs12135570,rs1217398,rs1228367,rs12313899,rs12462038,rs12626873,rs138300128,rs141427453,rs145396941,rs1725430,rs17526168,rs17554547,rs1776178,rs17887160,rs180811007,rs1859769,rs186480464,rs188306066,rs189064804,rs1957452,rs199597344,rs2282170,rs2303741,rs2304219,rs247068,rs…
ELF5	rs111308825,rs111509424,rs111543816,rs11205707,rs112342265,rs112908183,rs112946632,rs113319029,rs113365865,rs113711135,rs11552168,rs116000286,rs116040694,rs116130865,rs116529282,rs117659737,rs117680626,rs118041059,rs12452513,rs1256835,rs12609305,rs13353199,rs143874608,rs144693124,rs17523373,rs1832666,rs1837688,rs184051871,rs1873209,rs200796526,rs2251366,rs2306941,rs2556368,rs2693672,rs28546753,rs…
HOXB2	rs10096097,rs10146759,rs10225507,rs10400689,rs10753538,rs10754369,rs10774481,rs10824095,rs10849860,rs10853336,rs10910558,rs11022711,rs11046046,rs11080327,rs112137728,rs114982608,rs115228421,rs11582271,rs11615505,rs116171166,rs117079227,rs11764740,rs11773464,rs117990130,rs11903961,rs12096831,rs12104935,rs12148825,rs12306,rs12367873,rs12402647,rs12478635,rs12629052,rs12818008,rs12888408,rs12901160,…
SOX10	rs10165552,rs1035908,rs10409001,rs10482113,rs10773828,rs10774559,rs10791316,rs1079357,rs10798804,rs10902431,rs10925149,rs11108265,rs11118986,rs11121691,rs111352206,rs112111321,rs112408368,rs112502960,rs114982608,rs11617664,rs116588227,rs11690052,rs12032077,rs12409704,rs12435534,rs1245070,rs12587001,rs12609305,rs12612060,rs12724233,rs12742403,rs12801289,rs12937005,rs13043316,rs13399063,rs138720873…
KLF9	rs1001821,rs10146759,rs10208406,rs10211067,rs10225507,rs10437946,rs1065497,rs10766359,rs10849558,rs10899095,rs10951937,rs11048710,rs111279722,rs111594257,rs111674074,rs11175197,rs11180823,rs111968669,rs112087793,rs112111321,rs112137728,rs112175201,rs112215462,rs112359817,rs112502960,rs112587865,rs112619223,rs112638614,rs11264276,rs112778383,rs112938132,rs112946632,rs113011687,rs113340201,rs113368…
LEUTX	rs1125790,rs112986195,rs114982608,rs11642660,rs1259422,rs12787829,rs138151712,rs1383116,rs138808588,rs145228567,rs146605240,rs1483161,rs16840099,rs190199354,rs190522276,rs2255016,rs2351704,rs2409489,rs3218026,rs374543540,rs3752547,rs57591949,rs58324296,rs6079178,rs62089251,rs6661240,rs750578,rs7799818,rs8100979,rs9841443
HOXA10	rs10177746,rs10191980,rs10915194,rs11581566,rs11764740,rs12984288,rs13079656,rs13260665,rs13317307,rs1345468,rs17110111,rs17198857,rs17609880,rs177595,rs185505213,rs1984069,rs199837312,rs2038379,rs2111209,rs211976,rs2245225,rs2464996,rs2525735,rs2589310,rs2648463,rs2680687,rs2714488,rs2716227,rs2729448,rs2833504,rs2851438,rs34006114,rs4246263,rs4296545,rs4722463,rs4832046,rs4853705,rs57585543,rs6…
ARID5B	rs116611192,rs2431457,rs458056,rs79284424
ETS1	rs10489966,rs10791385,rs111543816,rs12306,rs12446376,rs12835814,rs1482286,rs149354782,rs1984584,rs34639219,rs3866543,rs4459386,rs62142648,rs6563367,rs6660782,rs7110277,rs7559150,rs77968482,rs9283650
BHLHA15	rs10744685,rs1772849,rs2356271,rs2791725,rs289588,rs4148111,rs4241409,rs4326846,rs60605633,rs62048414,rs6467906,rs7212406,rs7227237,rs73729539,rs755167,rs76275767,rs7972549,rs7988241
E2F3	rs1016827,rs10192827,rs10417381,rs11078409,rs11656035,rs1165839,rs28759016,rs2967429,rs2967510,rs2979688,rs298518,rs372628510,rs4238443,rs450308,rs4655064,rs56184201,rs57591949,rs6124314,rs653167,rs7179827,rs757693,rs76684205,rs80015519,rs9315393
ELK1	rs1000010,rs1008410,rs1009156,rs10225507,rs10271982,rs10281879,rs10414223,rs10422046,rs1051750,rs10752741,rs10774863,rs10841252,rs11046046,rs11076132,rs11076182,rs11119891,rs11122206,rs111308825,rs111509331,rs11164849,rs11170672,rs111796090,rs112087793,rs112111321,rs112240835,rs112299555,rs11231159,rs112558212,rs112619223,rs1132802,rs113400343,rs113522942,rs1136165,rs114414256,rs11542411,rs115820…
GATA2	rs10507735,rs10754369,rs111515468,rs11764740,rs1210684,rs12291016,rs141798394,rs1478658,rs1482286,rs16842681,rs17104684,rs181814062,rs184616826,rs192239606,rs2039623,rs2681411,rs2999519,rs35587381,rs4430547,rs57211553,rs5919549,rs61781002,rs6799592,rs687286,rs7113829,rs73169412,rs75048277,rs7539690,rs7558974,rs7600802,rs818296,rs825549,rs861591
CPHXL2	rs10753357,rs1106797,rs11075777,rs112360628,rs112551948,rs112657916,rs112797371,rs113321069,rs114982608,rs115157601,rs11641847,rs11656035,rs11802454,rs11908739,rs11908910,rs11950215,rs12563427,rs12835015,rs12969307,rs12999384,rs1383116,rs138808588,rs145188743,rs166720,rs16940363,rs182730783,rs1862584,rs189941834,rs191042791,rs1947025,rs2020948,rs2162616,rs2297140,rs2306941,rs2668429,rs2749575,rs2…
RXRA	rs11079572,rs11878203,rs17523436,rs2293738,rs4655064,rs4968207,rs62025078,rs79178345,rs9723509
NFATC4	rs10264443,rs10425598,rs1065497,rs1079357,rs10797000,rs10902431,rs11108265,rs111252381,rs11134014,rs111622730,rs111786665,rs111796939,rs112114764,rs112377091,rs112408368,rs112428462,rs1124669,rs112770825,rs112911989,rs112946632,rs112986195,rs113368091,rs113708270,rs113794290,rs115531303,rs11642660,rs11687271,rs117659737,rs12113294,rs12725924,rs12817125,rs12819167,rs12907541,rs13424690,rs138503112…
HOXB13	rs10184230,rs10489650,rs1054949,rs10861501,rs10927332,rs11062,rs11075674,rs11119588,rs11119883,rs11170776,rs11260822,rs115655539,rs11621510,rs12051373,rs12125166,rs12565590,rs12868646,rs12946228,rs13048959,rs1345468,rs1394781,rs142938079,rs1430351,rs145835089,rs146733182,rs1535112,rs1574213,rs1631576,rs1689604,rs17022861,rs17110111,rs17609880,rs181931074,rs183002584,rs183832365,rs190623927,rs1983…
PPARG	rs10772011,rs111398992,rs111509424,rs113699868,rs376257829,rs637929,rs71421264,rs77694338
ETV7	rs10002356,rs1008410,rs10136309,rs10146759,rs10184871,rs10199199,rs10208284,rs10208406,rs10211067,rs10225507,rs10252238,rs10281879,rs10405424,rs10408092,rs10419380,rs1055218,rs1065497,rs10773828,rs10774559,rs10789174,rs10852836,rs10908436,rs10927794,rs11020767,rs11046046,rs11061026,rs1108681,rs11090854,rs11108265,rs111228218,rs11123731,rs111308825,rs111320423,rs111379399,rs111484016,rs111509424,r…
ETV4	rs1010492,rs10146759,rs10176214,rs10405424,rs10417381,rs1049644,rs1051750,rs1065497,rs10850382,rs10894030,rs10951937,rs10958707,rs111320423,rs111509424,rs111543816,rs11160836,rs111699095,rs111796090,rs11180823,rs111815979,rs112137966,rs112215462,rs112619223,rs112749718,rs112872285,rs113059278,rs113165729,rs113285019,rs113368091,rs113460962,rs114124705,rs114188545,rs114197603,rs114693875,rs1149608…
STAT3	rs10176214,rs10199199,rs1033258,rs10404667,rs10784325,rs10863914,rs10894200,rs1093308,rs10951944,rs11127228,rs111308825,rs111320423,rs111622730,rs11170672,rs112359817,rs113155803,rs113368091,rs113600237,rs113708270,rs114093789,rs114306627,rs11549412,rs11549984,rs11642660,rs116588227,rs1167704,rs117022703,rs117164924,rs117370133,rs118102968,rs11833072,rs11865749,rs11868888,rs1189726,rs12113294,rs1…
HNF4A	rs10888563,rs1105258,rs11073920,rs11079572,rs111509424,rs111791472,rs11210564,rs112520194,rs112619223,rs114953172,rs114982608,rs11635145,rs11671185,rs116795990,rs117125310,rs11764487,rs11923765,rs12113294,rs12118515,rs12129690,rs12229901,rs12450429,rs12469681,rs12618057,rs12890225,rs12939853,rs13014796,rs13027352,rs130386,rs1327315,rs137945114,rs138286311,rs143874608,rs144172026,rs146797329,rs147…
FOXO1	rs17041271
ETV3	rs1008410,rs10146759,rs10176214,rs10209706,rs10225507,rs10405424,rs10417381,rs10459158,rs10477302,rs1058855,rs1065497,rs10737387,rs10760549,rs10775194,rs10782758,rs10798631,rs10842799,rs10854161,rs10876281,rs10903358,rs10928478,rs11022711,rs111344771,rs111476019,rs111543816,rs11170672,rs111796090,rs11205707,rs11209163,rs11210564,rs112416021,rs11258438,rs112587865,rs112619223,rs112652199,rs1127708…
PAX8	rs10835215,rs11084665,rs11264023,rs11669599,rs116893322,rs11704913,rs12025572,rs12121981,rs12205818,rs12459929,rs12999384,rs1383116,rs141427453,rs144135052,rs1568569,rs16869688,rs189190115,rs2102954,rs211976,rs224910,rs2284613,rs2596912,rs2650923,rs2783121,rs2979688,rs332857,rs346045,rs35500654,rs35501398,rs36114576,rs3756662,rs3812142,rs4655064,rs4713333,rs4776880,rs4810160,rs559260,rs6121209,rs…
HOXA2	rs11080327,rs11133783,rs112082219,rs114982608,rs116875756,rs11764740,rs12139824,rs12306,rs12319789,rs12757307,rs12901160,rs140735894,rs141427453,rs147547729,rs16951001,rs1776178,rs181618754,rs2041373,rs2049050,rs2242757,rs2251366,rs2834439,rs28376010,rs289378,rs2979688,rs33023,rs332837,rs34339675,rs349031,rs35060813,rs35739,rs372254148,rs3843754,rs4655064,rs543589,rs55834735,rs57591949,rs57868848…
FEV	rs1003619,rs10176214,rs10425598,rs10773828,rs10774559,rs10782758,rs1079357,rs10838316,rs11108265,rs11133964,rs111440891,rs111543816,rs111622730,rs111654222,rs11170672,rs112111321,rs112114764,rs1124669,rs112474011,rs112770825,rs112790486,rs112946632,rs112986195,rs113368091,rs113519174,rs113708270,rs113732836,rs113785522,rs114382205,rs114747971,rs114982608,rs115131679,rs11549412,rs11550134,rs116690…
HOXD12	rs10771350,rs12078729,rs12104935,rs12406215,rs13092828,rs13361707,rs134609,rs1574213,rs199837312,rs2823602,rs3014712,rs324398,rs34385289,rs36024111,rs4141789,rs4374230,rs4538150,rs6074015,rs61841147,rs62273861,rs6465470,rs6683163,rs73903463,rs77432067,rs9668071
ELF2	rs10096757,rs10160792,rs1055218,rs11073920,rs111308825,rs111543816,rs111616119,rs11180823,rs112299555,rs112619223,rs112674275,rs112881035,rs113799953,rs113888803,rs113919699,rs114625568,rs11636808,rs11654341,rs117219709,rs117479133,rs11907306,rs12027202,rs12301925,rs12310106,rs12449272,rs12478635,rs12609305,rs137954016,rs138986173,rs140456269,rs141519742,rs147856539,rs1514892,rs17554547,rs1819457…
HOXA4	rs11073942,rs2706710,rs5757280,rs8078750,rs8105800
KLF8	rs10168909,rs10176214,rs10773828,rs111308825,rs111509424,rs111616119,rs112619223,rs112622530,rs112908183,rs113059278,rs113368091,rs113473395,rs113618027,rs113708270,rs114182850,rs117680626,rs12113294,rs12618057,rs12888077,rs139564245,rs143874608,rs150519022,rs180956060,rs182455455,rs183488561,rs183781909,rs184640641,rs185627103,rs1862731,rs188534988,rs189304970,rs191615660,rs1936316,rs2336171,rs2…
TLX1	rs10078523,rs10112573,rs10146759,rs10165590,rs10225507,rs10261267,rs10465697,rs1052667,rs1056441,rs1065497,rs10771579,rs10808118,rs10832618,rs10859991,rs10888785,rs10914472,rs10919270,rs10930107,rs10934858,rs11061796,rs111311750,rs111509424,rs111561531,rs111699095,rs11170672,rs111742036,rs112087793,rs112137728,rs112205234,rs112239633,rs112276133,rs112281853,rs112428462,rs11261088,rs112619223,rs11…
SOX5	rs10040588,rs10082006,rs10084789,rs10146759,rs10148287,rs10157498,rs10176868,rs10211067,rs10240006,rs10410956,rs10417381,rs10424609,rs10460587,rs10773828,rs10836017,rs10876281,rs10892354,rs10894030,rs10935091,rs10952639,rs11022711,rs11071963,rs11086597,rs11122827,rs1113020,rs111398992,rs111509424,rs111543816,rs11160836,rs111815979,rs11210091,rs112111321,rs112137728,rs11227624,rs11240504,rs1126082…
STAT1	rs10054902,rs111311750,rs111527470,rs111547405,rs11210564,rs112619223,rs1131093,rs11557855,rs11649624,rs116918409,rs12118515,rs1359427,rs138986173,rs2251366,rs2306941,rs2572932,rs28636741,rs2959228,rs35201266,rs372034138,rs376252643,rs4609810,rs61811895,rs62237785,rs6478689,rs6684114,rs670425,rs6952435,rs75055357,rs76016560,rs79178345,rs79241981
CPHXL	rs1009156,rs10146759,rs1019505,rs10225507,rs10407367,rs10417381,rs10423795,rs1047616,rs10511998,rs1065497,rs10773828,rs10842799,rs10854161,rs10859991,rs10893507,rs10915962,rs11073761,rs11082011,rs11108265,rs111344771,rs111534123,rs111674074,rs11170672,rs111796090,rs11180823,rs111959436,rs11205707,rs112087793,rs11209163,rs112111321,rs112146197,rs112342265,rs112522467,rs112587865,rs112597118,rs1126…
OTX2	rs1079357,rs10871500,rs1132802,rs141427453,rs17554547,rs1870939,rs1892775,rs2024635,rs2241938,rs35201266,rs4655577,rs57591949,rs6062498,rs61926301,rs62005807,rs6603805,rs6956825,rs7311346,rs736262,rs7512803,rs75448266,rs7581943,rs818541,rs847687,rs932816
FOXA3	rs10064669,rs10803214,rs10843539,rs143874608,rs1870219,rs199837312,rs2190532,rs2236975,rs376633204,rs3772881,rs387639,rs6989517,rs7204845,rs7430189,rs8011105,rs8030996,rs963740
FIGLA	rs10235504,rs11623909,rs12329908,rs1239688,rs1259311,rs1338317,rs134609,rs1688012,rs1961677,rs216172,rs2457661,rs2500273,rs28444271,rs2948533,rs3026815,rs4935075,rs656323,rs7108229,rs7183707,rs77794820,rs789661,rs80221693,rs9611991,rs9787288,rs985569
GABPA	rs10225507,rs10979893,rs113369180,rs11669032,rs117990130,rs12449272,rs13439034,rs140921246,rs144693124,rs149902442,rs1561679,rs1573413,rs17436014,rs1776178,rs181973897,rs2289833,rs2839206,rs2839298,rs375099186,rs41311479,rs4797103,rs538704,rs6028167,rs62098305,rs6612242,rs6648375,rs71638501,rs717863,rs7540726,rs78313351,rs9935916
NFIX	rs10241282,rs10861501,rs11136012,rs115918372,rs11636934,rs117351323,rs11770421,rs12121981,rs12403691,rs12404717,rs12430462,rs12450429,rs12453468,rs12597122,rs1290616,rs1316329,rs13260665,rs132985,rs1330718,rs142393511,rs146458106,rs146741639,rs147789474,rs1513168,rs16846919,rs16856737,rs16927047,rs17076255,rs17548596,rs1776178,rs17831015,rs1811729,rs183523742,rs185659209,rs187479236,rs191747503,r…
POU5F1	rs10138791,rs10270298,rs10773109,rs1149743,rs11579248,rs11586128,rs11605633,rs11762921,rs12047418,rs12135121,rs12211003,rs1233444,rs12655501,rs1453003,rs17510499,rs182885909,rs183606251,rs187904257,rs200940444,rs2231569,rs2251366,rs2282979,rs2496360,rs2601206,rs3105572,rs35327698,rs35419594,rs35717991,rs35791631,rs35997851,rs371788965,rs3787184,rs469009,rs4900028,rs4978396,rs506657,rs57868848,rs5…
PAX6	rs10748298,rs10771350,rs10880096,rs10933443,rs112619223,rs117738019,rs1199729,rs12264256,rs12306,rs12445553,rs13092828,rs134609,rs137945114,rs138986173,rs143874608,rs144693124,rs146813762,rs149615243,rs151103380,rs1643034,rs17022861,rs17162712,rs17225744,rs185675647,rs1868101,rs188473663,rs191120102,rs196065,rs199705648,rs199857520,rs201254205,rs201385447,rs2301402,rs2504457,rs2581260,rs2680687,r…
SPI1	rs10402946,rs1079357,rs10863206,rs10915962,rs10915983,rs111308825,rs111745450,rs11180823,rs11205707,rs112215462,rs112287914,rs112359371,rs112825722,rs114797988,rs115696513,rs11576163,rs116745133,rs116869463,rs11704793,rs117442940,rs12026319,rs12118515,rs12313899,rs12485825,rs12626873,rs12814331,rs12899246,rs13000317,rs13095733,rs131359,rs140225614,rs144118207,rs145214891,rs1465425,rs148371528,rs1…
SATB1	rs10225507,rs10245681,rs10411508,rs10416758,rs10425598,rs10773828,rs10774345,rs10774559,rs1079354,rs10850358,rs10876281,rs10894030,rs10908436,rs1108064,rs11108265,rs11149803,rs11160833,rs111709742,rs111763940,rs111796090,rs111968669,rs112111321,rs112114764,rs112359817,rs112408368,rs11264554,rs112760221,rs112790486,rs112872285,rs112946632,rs113037438,rs113079526,rs113368091,rs113369180,rs113663555…
GLI3-CL	rs1002456,rs1005729,rs10094372,rs1009610,rs10146759,rs10176214,rs10405365,rs10417381,rs1051750,rs1066390,rs10773828,rs10853336,rs10908436,rs10928478,rs11067801,rs11073921,rs111344771,rs111398992,rs111509424,rs111534123,rs111560701,rs11160833,rs11160836,rs111752251,rs111796090,rs111952154,rs112005261,rs112111321,rs11240504,rs112451165,rs112521723,rs112619223,rs112651299,rs112870450,rs112938132,rs1…
NFIB	rs10096097,rs1338317,rs17223451,rs182020662,rs367743592,rs754790,rs7578575,rs79417151,rs9878609,rs9902512
SOX2	rs11075674,rs11685086,rs11845216,rs11901931,rs12629052,rs140597436,rs1514675,rs161974,rs17017229,rs1870219,rs189849878,rs199900731,rs2001678,rs2126143,rs2280151,rs2383302,rs2723158,rs4594581,rs493456,rs536823,rs543589,rs582200,rs637929,rs6469971,rs6492022,rs6660782,rs7116768,rs7218578,rs72740964,rs72768809,rs77297809,rs7949083,rs9427100,rs9594892
VSX1	rs10110397,rs10849559,rs111344771,rs11170672,rs117219709,rs11795613,rs1199730,rs1202928,rs12306,rs12636506,rs12820345,rs1325349,rs150519022,rs1589640,rs17367139,rs1880036,rs190199354,rs1985165,rs2048945,rs2297140,rs2421200,rs2703810,rs28627464,rs28731773,rs34265394,rs34385289,rs34997857,rs35375179,rs36085949,rs3759579,rs4822255,rs546856,rs55961512,rs60628344,rs61985042,rs61992274,rs62436946,rs653…
STAT5A	rs10281879,rs10773828,rs10783381,rs11021542,rs11108265,rs111320423,rs111359282,rs111622730,rs111802442,rs112542690,rs112770825,rs113340201,rs113368091,rs114274528,rs11549412,rs11634399,rs11642660,rs12430462,rs12609305,rs12612060,rs12707447,rs13014796,rs1408365,rs143817246,rs145396941,rs145928003,rs146605240,rs149100456,rs185677744,rs1884010,rs200545687,rs205898,rs2295412,rs2303741,rs2306941,rs233…
GATA4	rs10096097,rs10245627,rs11075674,rs114031048,rs117058497,rs11761892,rs11764740,rs11769390,rs11774986,rs1201332,rs12139824,rs12629052,rs13080985,rs142255094,rs1513081,rs1541714,rs17289605,rs17609880,rs2039623,rs2541600,rs2701654,rs2767508,rs67769150,rs6799592,rs6944734,rs72762349,rs745593,rs7539690,rs7575507,rs78385555,rs78964634,rs818296,rs861591,rs9283650,rs9857105
TBXT	rs10087841,rs10142489,rs10146759,rs10184871,rs10199199,rs10225507,rs10256487,rs1026001,rs1034414,rs10415924,rs10489741,rs10767634,rs10773828,rs10889705,rs10908436,rs10934858,rs11106590,rs11108265,rs11112157,rs111320423,rs111344771,rs111534123,rs11170672,rs11172821,rs111742586,rs111752251,rs111857565,rs111861376,rs112046181,rs112087793,rs112114764,rs112291223,rs112502960,rs112587865,rs112619223,rs…
HOXA5	rs10849546,rs11059891,rs112137728,rs117011776,rs11764740,rs117990130,rs12476744,rs13438256,rs17831015,rs183249223,rs186463743,rs319522,rs3746002,rs3756662,rs56166765,rs6554805,rs705533,rs7610425,rs861591,rs9944115
DUX4	rs1008050,rs10850381,rs1109303,rs11205707,rs11881918,rs12061275,rs12123211,rs138783038,rs1494512,rs150025531,rs16974196,rs190855108,rs2186845,rs2365516,rs2670342,rs3756662,rs55870811,rs62176332,rs62597517,rs6668965,rs6704041,rs6764364,rs719168,rs73144710,rs79981438,rs8181768,rs9540799,rs9830871
LHX4	rs10417381,rs10846880,rs10888977,rs10922179,rs11108265,rs111261603,rs11170672,rs112504358,rs112919507,rs1132802,rs113340201,rs113368091,rs113405498,rs113708270,rs1171571,rs117659737,rs11975237,rs12227917,rs12654029,rs12830302,rs12886549,rs12949115,rs12975585,rs13015877,rs131988,rs13242340,rs13251554,rs138808588,rs139799950,rs141909110,rs145396941,rs146605240,rs148360008,rs149373117,rs150235581,rs…
RREB1	rs10063290,rs10083697,rs1009156,rs10146759,rs10178369,rs10184871,rs10199199,rs10208284,rs10211067,rs10225507,rs10278152,rs10281879,rs10405269,rs10407367,rs1056987,rs1065497,rs10766359,rs10891942,rs10899095,rs10908436,rs10927794,rs10951937,rs11073921,rs11083447,rs11083461,rs11085889,rs11092429,rs11108265,rs11126027,rs111376483,rs111440307,rs111509424,rs111534123,rs111561531,rs11170672,rs111752251,…
ELK4	rs10103941,rs10146759,rs10170048,rs10184871,rs10199199,rs10208284,rs10211067,rs10225507,rs10281879,rs10402946,rs10407367,rs10413885,rs1062176,rs106871,rs10753365,rs10766359,rs10773828,rs10775389,rs1079357,rs10798281,rs10854673,rs10913203,rs10914472,rs11061352,rs11061796,rs11083857,rs11108265,rs111252381,rs111344771,rs111509424,rs111561531,rs11164880,rs111699095,rs111819396,rs111957864,rs111968669…
HOXA9	rs10230610,rs10445298,rs11020767,rs113172457,rs113210177,rs115250949,rs116000286,rs11619081,rs12442352,rs12707447,rs12897371,rs12937692,rs12973153,rs12974702,rs138300128,rs143597774,rs149100456,rs150316629,rs185059604,rs186579545,rs189379530,rs2235092,rs2288381,rs234123,rs2542044,rs2911442,rs319522,rs34141697,rs34191215,rs370701892,rs376372655,rs41428545,rs4319339,rs4925125,rs4955420,rs4968207,rs…
IRF8	rs1007881,rs10157498,rs10204724,rs10216097,rs10228592,rs10256087,rs10405424,rs10417381,rs10772497,rs10774913,rs10790241,rs10894030,rs10914472,rs11025555,rs11108265,rs111398992,rs112175201,rs112359817,rs112619223,rs112929405,rs113340201,rs113368091,rs113538281,rs113759524,rs113785522,rs114382205,rs114693875,rs114982608,rs11571378,rs115731330,rs115825639,rs11625290,rs116758960,rs11767363,rs11799013…
NFKB1	rs10039065,rs10168184,rs10184871,rs10236959,rs10416758,rs10425598,rs10440994,rs10482113,rs1049644,rs1055218,rs1055700,rs1063677,rs10773828,rs10774202,rs1079357,rs10875447,rs10880822,rs10890500,rs10907178,rs10920788,rs10940931,rs11079750,rs11083461,rs11092430,rs11108265,rs11121691,rs111355210,rs111410535,rs111646136,rs111796090,rs111815979,rs111861376,rs111952154,rs112111321,rs112256708,rs11227133…
SOX17	rs1002091,rs10052388,rs1009610,rs10157498,rs10180960,rs10211067,rs10402774,rs1055218,rs10746472,rs10771579,rs10784441,rs10808118,rs10950413,rs10950898,rs11033231,rs11057888,rs11083857,rs11108265,rs111346211,rs11160836,rs111861376,rs111960587,rs11210873,rs112111321,rs112146197,rs112244903,rs112428462,rs112483019,rs112619223,rs113340201,rs113368091,rs113614194,rs113663555,rs114982608,rs115731330,rs…
SMAD5	rs10200221,rs10407367,rs10416758,rs1065497,rs1079357,rs11071839,rs111305117,rs111308825,rs11171951,rs11178200,rs111796090,rs11205707,rs112076150,rs112190797,rs112252372,rs112359817,rs112408368,rs112488467,rs112848905,rs112986195,rs113315804,rs113368091,rs113740263,rs113898003,rs114382205,rs11549412,rs115628954,rs1167704,rs118039764,rs11829669,rs12077294,rs12140761,rs1228814,rs12299333,rs12430462,…
HOXA3	rs11167663,rs114172030,rs12031025,rs12447970,rs1291364,rs134596,rs148127902,rs148452796,rs2055642,rs2249938,rs236969,rs2644609,rs2708093,rs34290859,rs35661464,rs368433541,rs4806827,rs5917082,rs610775,rs62109945,rs72575928,rs7258963,rs73003874,rs77715335,rs79170794,rs7969198,rs8087903,rs8110150,rs968567,rs9900607
GCM1	rs10016216,rs1001686,rs1009156,rs10141733,rs10176214,rs10185551,rs10256087,rs1040402,rs10407367,rs10417381,rs10421915,rs10425598,rs10432363,rs10478787,rs106189,rs10748298,rs10750417,rs10766359,rs10849558,rs10907384,rs10927794,rs10948573,rs10950898,rs11022711,rs11103944,rs111359514,rs111509424,rs111527470,rs11160836,rs11161621,rs111815979,rs112017841,rs11207662,rs11209163,rs112137728,rs112175201,r…
ELF4	rs10160730,rs10165141,rs10176214,rs10208406,rs10211067,rs10405424,rs10414095,rs10417381,rs1051750,rs10751662,rs1079369,rs10849558,rs10951937,rs11075664,rs111437883,rs11145867,rs111509424,rs11160833,rs11160836,rs111796090,rs112017841,rs112078240,rs11209163,rs112137728,rs11240504,rs112502960,rs112578929,rs112619223,rs112778383,rs112946632,rs113059278,rs113368091,rs113766217,rs113785522,rs114382205,…
ZNF808	rs10157498,rs10165141,rs10176214,rs10252922,rs10405365,rs10405424,rs10417381,rs1066389,rs10787725,rs10808960,rs10845687,rs10853781,rs10853955,rs10894030,rs10933674,rs111311750,rs111398992,rs112005261,rs112359817,rs112542690,rs112619223,rs112749718,rs113300592,rs113368091,rs113667859,rs113766217,rs113785522,rs113873219,rs113986220,rs114715611,rs114982608,rs11542747,rs11571378,rs115731330,rs1158895…
ELF1	rs1051750,rs1065497,rs11079572,rs111308825,rs111398992,rs111509424,rs111527470,rs111543816,rs111908662,rs11205707,rs112111321,rs112460923,rs112619223,rs113319029,rs113711135,rs113799953,rs114625568,rs1150900,rs11608885,rs11768416,rs11769922,rs11786004,rs118151917,rs11880758,rs11904602,rs12035664,rs12113294,rs12231078,rs12301925,rs12306,rs12449272,rs12618057,rs12978692,rs138986173,rs144693124,rs14…
SP1	rs10176214,rs10208406,rs10281879,rs10405424,rs10407367,rs10425598,rs1046276,rs10773828,rs10774559,rs10951937,rs11046046,rs11108265,rs111447543,rs111527470,rs111543816,rs111685837,rs111695060,rs11170672,rs111786665,rs111796090,rs111796939,rs11205707,rs112114764,rs112175201,rs112359817,rs112408368,rs112499393,rs112543012,rs112652199,rs112829741,rs112946632,rs112997568,rs113068799,rs113172457,rs1132…
XBP1	rs11084788,rs112082219,rs115165487,rs1165839,rs12939520,rs139121661,rs149100456,rs150552759,rs186480464,rs189526884,rs2000549,rs2856968,rs28610170,rs2967510,rs33844,rs3843754,rs4802251,rs56080874,rs56166765,rs57591949,rs57597951,rs6503064,rs6528355,rs7251246,rs7257809,rs7259925,rs73437682,rs75663098,rs79170781,rs80343056,rs8101956,rs8103162,rs877567,rs9547346,rs9806590
KLF16	rs10089299,rs1009156,rs10281879,rs10405424,rs10407367,rs10417381,rs10425598,rs1065497,rs1075368,rs10773828,rs10782758,rs10854161,rs10929699,rs11079750,rs11083857,rs11095638,rs11108265,rs111311750,rs111440307,rs111543816,rs111616119,rs111685837,rs11170672,rs111845558,rs111974161,rs112111321,rs112114764,rs112269913,rs112342265,rs112359817,rs112408368,rs112428462,rs112499393,rs112946632,rs113233393,…
TFAP2A	rs10022598,rs10114626,rs10160792,rs10211067,rs10418560,rs10425598,rs10755419,rs10773828,rs1079357,rs10853336,rs10873301,rs10908454,rs10953923,rs11065612,rs11072728,rs1113020,rs111311750,rs111440307,rs111497668,rs111509424,rs111527470,rs111622730,rs11170672,rs11185148,rs11203425,rs112087793,rs112111321,rs112359817,rs11240501,rs112547384,rs112986195,rs112997568,rs113368091,rs113554591,rs113785522,r…
GATA1	rs11764740,rs12051373,rs237765,rs57868848,rs612548,rs7433704,rs8064732,rs861591
FOXJ2	rs10098538,rs10146759,rs10177746,rs10211067,rs10225507,rs10261267,rs10765712,rs10849860,rs10873301,rs10904322,rs10979893,rs11075674,rs11075998,rs11089197,rs11170672,rs11176344,rs112111321,rs11255487,rs112943893,rs113340201,rs113569979,rs114829951,rs114982608,rs116172436,rs11655019,rs11735092,rs11761892,rs11764740,rs11773464,rs12096831,rs12104935,rs12126653,rs12306,rs12404359,rs12450372,rs12461519…
LHX3	rs10083697,rs10146759,rs10211067,rs10215172,rs10225507,rs1035908,rs1047616,rs1052667,rs1065497,rs10766359,rs10902140,rs11049068,rs11061796,rs11090481,rs11127156,rs111509424,rs111598355,rs111622730,rs11170672,rs112087793,rs112137728,rs112215462,rs112502960,rs112541558,rs112619223,rs112986195,rs112990400,rs113118911,rs113340201,rs113368091,rs113651836,rs114213469,rs114628762,rs11542411,rs115531303,…
ETV2	rs10113779,rs10157498,rs1019512,rs10402946,rs10411508,rs10416843,rs1041879,rs10422762,rs10506978,rs1079357,rs10859991,rs10876530,rs10920230,rs11084719,rs11121817,rs11164849,rs112087793,rs112521723,rs113018480,rs113577760,rs113598576,rs116041682,rs11619109,rs11649307,rs117164924,rs117599251,rs117761251,rs11848055,rs11904602,rs12104935,rs12147883,rs12301925,rs12313899,rs12593301,rs12600336,rs130301…
LHX8	rs2693672
PRDM1	rs1009610,rs10198822,rs10208284,rs10417381,rs10732377,rs10840112,rs10933674,rs11029925,rs11057888,rs11085123,rs111509424,rs111534123,rs11185717,rs111908662,rs113300592,rs113340201,rs114982608,rs11549984,rs115731330,rs1164271,rs12138048,rs12184497,rs12484254,rs12578533,rs1262237,rs12884929,rs12936731,rs12939116,rs13089410,rs13204640,rs13265641,rs1383116,rs1388941,rs140543605,rs144693124,rs14850602…
USF1	rs11770695,rs17676666,rs199837312,rs2851501,rs34704317,rs4423210,rs7640308,rs7963939,rs858741
TFAP4	rs34405151
TEAD4	rs10048206,rs10282487,rs10454860,rs10737237,rs10745511,rs10836017,rs10879966,rs11041962,rs11079243,rs11158519,rs11177570,rs11196754,rs112137728,rs115038091,rs1151272,rs115250949,rs12136404,rs12563627,rs12624686,rs12677881,rs12785453,rs12890225,rs1293439,rs12939520,rs12980862,rs13049633,rs13079656,rs1398474,rs140280045,rs144566132,rs148891646,rs1713068,rs171343,rs17831015,rs185087,rs186119635,rs18…
ZNF200	rs10221127,rs10248844,rs1035159,rs1079357,rs10836017,rs10898414,rs11072270,rs11112234,rs111486708,rs11160718,rs11185148,rs112137728,rs113522942,rs114178422,rs116310478,rs11635626,rs11652544,rs11764740,rs117650092,rs11768271,rs11772641,rs12064785,rs12078729,rs12151059,rs12324016,rs12406215,rs12937005,rs12939520,rs12973653,rs12977514,rs13413374,rs138151712,rs1383116,rs145348479,rs145947891,rs146507…
ERF	rs1009156,rs11024636,rs111307142,rs111308825,rs112111321,rs11260822,rs113485822,rs114688279,rs11576163,rs117829797,rs11868888,rs11878203,rs12025572,rs12035664,rs1257331,rs13542,rs140534208,rs141427453,rs1420299,rs16869688,rs17554547,rs181543599,rs185059604,rs193228003,rs193249552,rs1981711,rs2072726,rs2098116,rs2251366,rs2299805,rs238767,rs241951,rs2585126,rs34239095,rs3746002,rs3754293,rs3756662…
RFX2	rs11957857,rs2983093,rs3808317,rs7318395,rs772556
RFX6	rs1014417,rs10185551,rs10200004,rs10772497,rs10774169,rs10842885,rs10923578,rs1105983,rs11084948,rs111754759,rs112355295,rs112378193,rs11264421,rs11674612,rs117064964,rs11895772,rs12027747,rs12492073,rs12516157,rs12731882,rs13083987,rs147990766,rs150072051,rs17022861,rs17676666,rs17819134,rs180954979,rs185861105,rs185899165,rs1861848,rs192121991,rs199765880,rs200534257,rs201018941,rs211976,rs2236…
SOX6	rs1008410,rs10169712,rs10184871,rs10199199,rs10211067,rs10225507,rs10231604,rs10419269,rs10425598,rs10428627,rs10766359,rs10773828,rs10845687,rs10859991,rs10908436,rs10951937,rs11083857,rs11112157,rs111252381,rs111349193,rs111509424,rs111616119,rs111674074,rs111699095,rs11170672,rs111741904,rs11176344,rs11180823,rs111984982,rs112087793,rs112108503,rs112111321,rs112137728,rs112163118,rs112215462,r…
KLF6	rs10168184,rs10407367,rs10773828,rs10849860,rs10874883,rs10908436,rs1110071,rs111368796,rs112281347,rs112299555,rs11261088,rs113368091,rs113661222,rs113708270,rs115681635,rs115917137,rs11656781,rs11668279,rs11670864,rs11708705,rs117659737,rs117680626,rs118093058,rs11865749,rs12049614,rs12060237,rs12113294,rs12742403,rs1274524,rs13222617,rs13233679,rs13243618,rs138808588,rs139799950,rs142510622,rs…
TPRX1	rs1002456,rs10096097,rs10145636,rs10225507,rs10417381,rs10765734,rs10782758,rs10888977,rs10934601,rs111796090,rs112017841,rs112137728,rs112619223,rs113368091,rs113369180,rs113458760,rs113554591,rs113663555,rs114693875,rs114982608,rs11641520,rs11764740,rs117990130,rs11865749,rs12138048,rs12306,rs12460985,rs1259422,rs12757307,rs12868646,rs13000317,rs13014796,rs13027636,rs131988,rs13405694,rs1383116…
KLF4	rs10160792,rs10415908,rs10773828,rs10836017,rs10909887,rs10951937,rs11061163,rs11079572,rs11079750,rs11083790,rs111308825,rs111440307,rs111484016,rs11150590,rs111509424,rs111527470,rs111543816,rs111616119,rs111635960,rs112008860,rs112111321,rs112299555,rs11237378,rs112518312,rs112520194,rs112619223,rs112637752,rs112829741,rs112946632,rs112981550,rs113059278,rs113661761,rs114982608,rs115078454,rs1…
FOXA1	rs62602423,rs7811911
ISX	rs10136729,rs10407320,rs10850358,rs11079750,rs111349193,rs11170672,rs11192947,rs113769174,rs114008430,rs117659737,rs117880161,rs12025572,rs1245070,rs1248035,rs12687144,rs12907541,rs12981121,rs13041320,rs13386862,rs140103307,rs140708319,rs1468009,rs147267139,rs1674033,rs1888600,rs1888633,rs190321095,rs2066440,rs2361467,rs2369502,rs2731347,rs2773170,rs28360848,rs2914438,rs324995,rs34288864,rs357150…
SKIL	rs10177746,rs10225507,rs10521683,rs10774481,rs10827405,rs10835215,rs10873301,rs11048709,rs11078408,rs11185148,rs11205707,rs112111321,rs112137728,rs112359817,rs112943893,rs113730019,rs113732836,rs113742022,rs114829951,rs114982608,rs11696270,rs11764740,rs117990130,rs12058658,rs12367873,rs12485244,rs12592939,rs12747275,rs12884929,rs12911703,rs12939520,rs12977498,rs13019683,rs132793,rs138026004,rs139…
HOXA11	rs11130520,rs11149741,rs11206895,rs112137966,rs114982608,rs117011776,rs11708616,rs12367873,rs12696328,rs12944041,rs12968719,rs13079656,rs1328363,rs13410413,rs137977930,rs148499987,rs149826267,rs16943785,rs17022861,rs17110818,rs17609880,rs17626153,rs183587090,rs187332561,rs191173955,rs191272403,rs192110959,rs192562604,rs192878844,rs1966136,rs199837312,rs201903735,rs202209183,rs211976,rs2278279,rs2…
LHX1	rs10054902,rs1065497,rs10880860,rs111509424,rs112424194,rs112619223,rs11764740,rs12032364,rs192979610,rs2066364,rs2301402,rs2306941,rs2442819,rs2494391,rs28439928,rs301907,rs34197876,rs4268920,rs4302219,rs4655064,rs4968207,rs56203783,rs61926301,rs62075824,rs6806100,rs74853208,rs7497457,rs76078632,rs7646772,rs7781141,rs79178345,rs79822985,rs861591,rs9430648,rs9906272
MYOD1	rs1005729,rs1009156,rs10109912,rs10115321,rs10146759,rs10147131,rs10172302,rs10210711,rs10225507,rs10233311,rs10252176,rs10281879,rs10407367,rs10417381,rs10422762,rs10432045,rs10464987,rs10750096,rs10750417,rs10766359,rs10773828,rs10778345,rs10778547,rs10784480,rs10793464,rs10832401,rs10876229,rs10881583,rs10916021,rs10928478,rs10973156,rs11025569,rs11039159,rs11106857,rs1113020,rs11133910,rs1113…
ESR1	rs10483869,rs11061796,rs11067059,rs111484016,rs11205707,rs11260090,rs117761251,rs12316925,rs140635128,rs141322730,rs149687598,rs180956060,rs1873209,rs2190332,rs2306941,rs28454866,rs375144120,rs473907,rs4883596,rs6011076,rs62025078,rs62335971,rs71456068,rs7208460,rs72640793,rs7945128,rs8066411,rs8121667
MYB	rs1055218,rs11114042,rs111308825,rs111509424,rs111527470,rs112590285,rs112619223,rs113584287,rs113742022,rs113799953,rs11764740,rs117990130,rs118190460,rs12025572,rs12325788,rs12478635,rs139564245,rs143874608,rs144693124,rs149259341,rs17272784,rs183815472,rs186380622,rs1868101,rs200545687,rs2279824,rs2306941,rs2351704,rs238767,rs2486009,rs28742580,rs304076,rs369408337,rs373824695,rs373945208,rs37…
CREB1	rs111741904,rs112749718,rs115131679,rs115479386,rs12000219,rs144454089,rs146831812,rs1667605,rs1862731,rs187984232,rs2031628,rs2045456,rs2070380,rs2272983,rs2513289,rs28444867,rs4805605,rs57122454,rs57345398,rs5750495,rs752503,rs79381401,rs8080539
KLF12	rs1008410,rs10146759,rs10184871,rs10199199,rs10208406,rs10211067,rs10225507,rs10402774,rs10407367,rs1056987,rs1065497,rs10773828,rs10784721,rs10897488,rs10927794,rs10951937,rs11020767,rs11037860,rs11046046,rs11049068,rs11050452,rs11090924,rs11108265,rs111308825,rs111447543,rs111509424,rs111561531,rs111685837,rs11170672,rs11180823,rs111968669,rs111988643,rs112087793,rs112111321,rs112137728,rs11217…
KLF3	rs1003619,rs10146759,rs10176214,rs10211067,rs1036493,rs10405269,rs10406430,rs10416817,rs10417381,rs1051750,rs1055218,rs10766359,rs1076991,rs10773828,rs10853989,rs10928478,rs10951937,rs11016886,rs11078770,rs11083857,rs111313095,rs111320423,rs111398992,rs111509424,rs111513320,rs111527470,rs11160833,rs11160836,rs111815979,rs111968669,rs112076150,rs112087793,rs112111321,rs112137966,rs112215462,rs1124…
PDX1	rs10230610,rs10233419,rs10278001,rs10409001,rs10417381,rs1043395,rs1056987,rs10774559,rs1079357,rs10836245,rs10853336,rs10888977,rs10915194,rs10951937,rs11046046,rs11078353,rs1108681,rs11108265,rs11122375,rs111513320,rs111534123,rs111622730,rs11164928,rs11170672,rs111999329,rs11205707,rs112108503,rs112111321,rs112114764,rs112271335,rs112359817,rs112652199,rs112835547,rs112865848,rs112895836,rs113…
RFX4	rs10225507,rs10230610,rs10774481,rs1079357,rs11078408,rs111878177,rs11210564,rs112359817,rs113620872,rs114829951,rs114982608,rs11608885,rs11670828,rs11672724,rs116893322,rs11696270,rs117219709,rs11739543,rs11909560,rs12083129,rs12452980,rs12478635,rs12481820,rs12618057,rs12974702,rs12981412,rs13051841,rs138792674,rs139793899,rs141427453,rs1465425,rs147762320,rs149100456,rs150316629,rs16951001,rs1…
