# Supplementary material
Source: Research Square preprint supplement (doi:10.21203/rs.3.rs-8894562/v1)
Supplement: Supplementary file 3 [file 1fd0bc04a05ec6e3e0f470de.xlsx]

## Sheet: Fisher's exact test (FDR<0.01)
Tag	Domain1	Domain2	Both	Just_Domain_1	Just_Domain_2	Neither	OR	OR.lower95	OR.upper95	p-value	FDR
Homeodomain + Homeodomain	Homeodomain	Homeodomain	356	8259	8259	14205	0.0741585	0.0662608	0.0827647	0	0
Ets + Homeodomain	Ets	Homeodomain	128	3944	8487	18520	0.0708216	0.0587919	0.0846417	0	0
Homeodomain + zf-C2H2	Homeodomain	zf-C2H2	543	8072	4455	18009	0.271944	0.247368	0.298548	1.55561e-215	2.03267e-211
Homeodomain + RFX_DNA_binding	Homeodomain	RFX_DNA_binding	60	8555	1892	20572	0.0762607	0.0578909	0.0987499	5.78747e-194	5.67172e-190
Ets + Ets	Ets	Ets	51	4021	4021	22986	0.0725073	0.0537685	0.0957605	9.34127e-189	7.32355e-185
HLH + Homeodomain	HLH	Homeodomain	123	1884	8492	20580	0.158216	0.130513	0.1903	4.88867e-142	3.19393e-138
Homeodomain + SAM_PNT	Homeodomain	SAM_PNT	49	8566	1429	21035	0.0842058	0.0619237	0.112079	8.82118e-142	4.93986e-138
Homeodomain + MH1	Homeodomain	MH1	109	8506	1774	20690	0.149452	0.121827	0.181753	3.52998e-138	1.72969e-134
Ets + zf-C2H2	Ets	zf-C2H2	188	3884	4810	22197	0.22337	0.191308	0.259547	1.15284e-128	5.02127e-125
Forkhead + Homeodomain	Forkhead	Homeodomain	196	2083	8419	20381	0.227824	0.195338	0.264447	1.37116e-121	5.37496e-118
BTB + Homeodomain	BTB	Homeodomain	62	1331	8553	21133	0.115097	0.0876531	0.148712	1.43131e-117	5.10067e-114
Homeodomain + TEA	Homeodomain	TEA	15	8600	978	21486	0.0383202	0.0213334	0.0635637	3.13254e-116	9.44582e-113
Homeodomain + YBD	Homeodomain	YBD	15	8600	978	21486	0.0383202	0.0213334	0.0635637	3.13254e-116	9.44582e-113
CTF_NFI + Homeodomain	CTF_NFI	Homeodomain	94	1454	8521	21010	0.159402	0.127818	0.196795	2.52475e-109	6.59801e-106
Homeodomain + NfI_DNAbd_pre-N	Homeodomain	NfI_DNAbd_pre-N	94	8521	1454	21010	0.159402	0.127818	0.196795	2.52475e-109	6.59801e-106
zf-C2H2 + zf-C2H2	zf-C2H2	zf-C2H2	334	4664	4664	21417	0.328872	0.292121	0.369267	7.26686e-103	1.78038e-99
Ets + Forkhead	Ets	Forkhead	40	4032	2239	24768	0.109747	0.0780516	0.150263	2.47275e-90	5.70187e-87
Homeodomain + RFX1_trans_act	Homeodomain	RFX1_trans_act	21	8594	828	21636	0.0638539	0.0392835	0.098373	6.52617e-89	1.42126e-85
RFX_DNA_binding + zf-C2H2	RFX_DNA_binding	zf-C2H2	53	1899	4945	24182	0.136487	0.101652	0.179635	3.09433e-86	6.38408e-83
Elf-1_N + Homeodomain	Elf-1_N	Homeodomain	25	819	8590	21645	0.0769195	0.0494679	0.114472	1.29099e-83	2.53033e-80
Forkhead_N + Homeodomain	Forkhead_N	Homeodomain	39	894	8576	21570	0.109725	0.077431	0.151381	1.09715e-80	2.04802e-77
Ets + RFX_DNA_binding	Ets	RFX_DNA_binding	31	4041	1921	25086	0.100183	0.0677657	0.142942	3.63818e-80	6.48258e-77
Forkhead + zf-C2H2	Forkhead	zf-C2H2	100	2179	4898	23902	0.223958	0.180984	0.274425	1.04753e-72	1.78535e-69
Ets + HLH	Ets	HLH	43	4029	1964	25043	0.136091	0.0980081	0.184394	3.80714e-72	6.21833e-69
Ets + MH1	Ets	MH1	40	4032	1843	25164	0.135459	0.0962529	0.185544	6.08998e-68	9.54909e-65
HSF_DNA-bind + Homeodomain	HSF_DNA-bind	Homeodomain	2	478	8613	21986	0.0107005	0.00129768	0.0388335	1.37872e-64	2.07868e-61
HLH + zf-C2H2	HLH	zf-C2H2	92	1915	4906	24166	0.236649	0.189404	0.292523	2.84056e-61	4.12407e-58
KRAB + KRAB	KRAB	KRAB	93	476	476	30034	12.322	9.5883	15.7242	3.48991e-60	4.88587e-57
Ets + TEA	Ets	TEA	1	4071	992	26015	0.00644371	0.000168965	0.0360068	8.37631e-60	1.0945e-56
Ets + YBD	Ets	YBD	1	4071	992	26015	0.00644371	0.000168965	0.0360068	8.37631e-60	1.0945e-56
SAM_PNT + zf-C2H2	SAM_PNT	zf-C2H2	50	1428	4948	24653	0.174459	0.128648	0.231719	5.44826e-57	6.88941e-54
CTF_NFI + Ets	CTF_NFI	Ets	33	1515	4039	25492	0.137482	0.0941414	0.194285	1.2125e-55	1.4403e-52
Ets + NfI_DNAbd_pre-N	Ets	NfI_DNAbd_pre-N	33	4039	1515	25492	0.137482	0.0941414	0.194285	1.2125e-55	1.4403e-52
HNF_C + Homeodomain	HNF_C	Homeodomain	34	622	8581	21842	0.13914	0.0953995	0.19672	5.5428e-51	6.39053e-48
MH1 + zf-C2H2	MH1	zf-C2H2	101	1782	4897	24299	0.281241	0.227292	0.344662	7.61663e-49	8.53063e-46
TEA + zf-C2H2	TEA	zf-C2H2	22	971	4976	25110	0.114336	0.0712669	0.174332	4.05916e-48	4.30052e-45
YBD + zf-C2H2	YBD	zf-C2H2	22	971	4976	25110	0.114336	0.0712669	0.174332	4.05916e-48	4.30052e-45
KRAB + zf-C2H2	KRAB	zf-C2H2	232	337	4766	25744	3.7184	3.12332	4.42123	7.74894e-46	7.99364e-43
BTB + Ets	BTB	Ets	35	1358	4037	25649	0.163754	0.113384	0.229355	1.1044e-45	1.11006e-42
Ets + SAM_PNT	Ets	SAM_PNT	42	4030	1436	25571	0.185588	0.132926	0.252701	8.13011e-45	7.9675e-42
CUT + Homeodomain	CUT	Homeodomain	106	917	8509	21547	0.292753	0.236745	0.35884	3.46918e-43	3.31687e-40
Ets + RFX1_trans_act	Ets	RFX1_trans_act	7	4065	842	26165	0.0535133	0.021431	0.110863	7.10115e-42	6.62774e-39
BTB + zf-C2H2	BTB	zf-C2H2	65	1328	4933	24753	0.245608	0.188108	0.315802	1.15137e-41	1.04962e-38
Homeodomain + SIX1_SD	Homeodomain	SIX1_SD	34	8581	536	21928	0.162099	0.110981	0.229571	1.06929e-40	9.52641e-38
Forkhead + RFX_DNA_binding	Forkhead	RFX_DNA_binding	21	2258	1931	26869	0.129413	0.079752	0.198933	2.42012e-40	2.10819e-37
CUT + Ets	CUT	Ets	18	1005	4054	26002	0.11488	0.0677202	0.182771	4.72571e-40	4.02712e-37
Homeodomain + JAB	Homeodomain	JAB	9	8606	364	22100	0.0634964	0.0287851	0.121957	1.4746e-39	1.22988e-36
BTB + Forkhead	BTB	Forkhead	5	1388	2274	27412	0.0433974	0.0140486	0.101745	1.92119e-39	1.56898e-36
Ets + Forkhead_N	Ets	Forkhead_N	14	4058	919	26088	0.0979391	0.0532807	0.165372	5.48747e-39	4.38997e-36
Homeodomain + zf-CCCH_4	Homeodomain	zf-CCCH_4	2	8613	287	22177	0.0179336	0.00216494	0.065426	1.14733e-37	8.99503e-35
Homeodomain + KRAB	Homeodomain	KRAB	38	8577	531	21933	0.183	0.127939	0.254795	1.66827e-37	1.28228e-34
Forkhead + SAM_PNT	Forkhead	SAM_PNT	9	2270	1469	27331	0.0737675	0.0336174	0.140664	2.4274e-37	1.82988e-34
MH1 + RFX_DNA_binding	MH1	RFX_DNA_binding	13	1870	1939	27257	0.0977274	0.0518406	0.167933	2.74787e-37	2.03239e-34
Homeodomain + Pou	Homeodomain	Pou	36	8579	513	21951	0.179558	0.124225	0.252194	1.31194e-36	9.52369e-34
DLL_N + Homeodomain	DLL_N	Homeodomain	9	329	8606	22135	0.0703625	0.0318777	0.135307	7.08973e-35	5.05305e-32
E2F_CC-MB + Homeodomain	E2F_CC-MB	Homeodomain	12	344	8603	22120	0.089696	0.045873	0.158806	3.73941e-34	2.61758e-31
HLH + RFX_DNA_binding	HLH	RFX_DNA_binding	20	1987	1932	27140	0.1414	0.0859699	0.219635	3.88958e-34	2.67494e-31
SIX1_SD + zf-C2H2	SIX1_SD	zf-C2H2	7	563	4991	25518	0.0635718	0.0254467	0.131965	1.26546e-33	8.55275e-31
Forkhead_N + zf-C2H2	Forkhead_N	zf-C2H2	35	898	4963	25183	0.197773	0.136671	0.277566	1.50281e-33	9.98474e-31
GATA + Homeodomain	GATA	Homeodomain	80	695	8535	21769	0.29357	0.229628	0.371023	3.86008e-33	2.52192e-30
Homeodomain + TF_AP-2	Homeodomain	TF_AP-2	7	8608	296	22168	0.0609043	0.0242586	0.127114	1.48248e-32	9.52676e-30
Homeodomain + Vert_HS_TF	Homeodomain	Vert_HS_TF	1	8614	238	22226	0.0108602	0.000278676	0.0610125	1.76905e-32	1.1185e-29
CTF_NFI + RFX_DNA_binding	CTF_NFI	RFX_DNA_binding	9	1539	1943	27588	0.0830358	0.0378376	0.158393	2.1479e-32	1.31559e-29
NfI_DNAbd_pre-N + RFX_DNA_binding	NfI_DNAbd_pre-N	RFX_DNA_binding	9	1539	1943	27588	0.0830358	0.0378376	0.158393	2.1479e-32	1.31559e-29
Ets + HMG_box	Ets	HMG_box	45	4027	1210	25797	0.238246	0.172499	0.321486	8.77135e-32	5.2898e-29
CTF_NFI + zf-C2H2	CTF_NFI	zf-C2H2	100	1448	4898	24633	0.347324	0.280081	0.426661	1.77777e-31	1.04013e-28
NfI_DNAbd_pre-N + zf-C2H2	NfI_DNAbd_pre-N	zf-C2H2	100	1448	4898	24633	0.347324	0.280081	0.426661	1.77777e-31	1.04013e-28
Elf-1_N + Ets	Elf-1_N	Ets	17	827	4055	26180	0.13272	0.0768392	0.214102	2.80053e-31	1.61442e-28
RFX_DNA_binding + RFX_DNA_binding	RFX_DNA_binding	RFX_DNA_binding	22	1930	1930	27197	0.160636	0.100179	0.24468	3.24978e-31	1.84625e-28
E2F_TDP + Homeodomain	E2F_TDP	Homeodomain	18	359	8597	22105	0.128923	0.0755129	0.206884	5.02554e-31	2.8143e-28
RFX1_trans_act + zf-C2H2	RFX1_trans_act	zf-C2H2	32	817	4966	25264	0.199267	0.135193	0.283998	1.80108e-30	9.94398e-28
Homeodomain + SWIRM	Homeodomain	SWIRM	24	8591	390	22074	0.158121	0.100019	0.239001	1.98254e-30	1.07938e-27
CUTL + Homeodomain	CUTL	Homeodomain	72	629	8543	21835	0.292548	0.225724	0.374351	3.12701e-30	1.65647e-27
Homeodomain + ULD	Homeodomain	ULD	72	8543	629	21835	0.292548	0.225724	0.374351	3.12701e-30	1.65647e-27
RFX_DNA_binding + SAM_PNT	RFX_DNA_binding	SAM_PNT	10	1942	1468	27659	0.0970231	0.0463506	0.179354	1.45101e-29	7.58395e-27
Homeodomain + PAX	Homeodomain	PAX	50	8565	515	21949	0.248792	0.18203	0.333428	4.22951e-29	2.18154e-26
Homeodomain + MH2	Homeodomain	MH2	15	8600	323	22141	0.119564	0.0661245	0.200338	6.04525e-29	3.07758e-26
Ets + PAX	Ets	PAX	4	4068	561	26446	0.0463545	0.0125876	0.119451	8.98488e-29	4.51548e-26
MH1 + MH1	MH1	MH1	21	1862	1862	27334	0.165568	0.101994	0.254646	1.30353e-28	6.46815e-26
Ets + HNF_C	Ets	HNF_C	9	4063	647	26360	0.0902509	0.0410616	0.172579	2.14572e-28	1.05141e-25
MH1 + SAM_PNT	MH1	SAM_PNT	10	1873	1468	27728	0.100848	0.0481754	0.186442	5.25987e-28	2.54552e-25
CUTL + Ets	CUTL	Ets	12	689	4060	26318	0.112902	0.0579915	0.198759	5.9776e-28	2.82315e-25
Ets + ULD	Ets	ULD	12	4060	689	26318	0.112902	0.0579915	0.198759	5.9776e-28	2.82315e-25
RHD_DNA_bind + RHD_dimer	RHD_DNA_bind	RHD_dimer	14	39	39	30987	281.358	131.282	591.287	6.1537e-28	2.87172e-25
Ets + SIX1_SD	Ets	SIX1_SD	5	4067	565	26442	0.0575383	0.0185907	0.13522	8.41581e-28	3.88117e-25
Forkhead + HLH	Forkhead	HLH	41	2238	1966	26834	0.250056	0.178353	0.341696	2.25431e-27	1.02754e-24
RFX_DNA_binding + TEA	RFX_DNA_binding	TEA	1	1951	992	28135	0.0145399	0.00037249	0.0813029	3.85233e-27	1.71604e-24
RFX_DNA_binding + YBD	RFX_DNA_binding	YBD	1	1951	992	28135	0.0145399	0.00037249	0.0813029	3.85233e-27	1.71604e-24
HMG_box + zf-C2H2	HMG_box	zf-C2H2	78	1177	4920	24904	0.335451	0.262702	0.423021	5.15968e-27	2.27258e-24
Forkhead + Forkhead	Forkhead	Forkhead	54	2225	2225	26575	0.28988	0.216317	0.381144	6.38299e-27	2.78015e-24
GCM + Homeodomain	GCM	Homeodomain	5	235	8610	22229	0.0549334	0.0176679	0.130097	1.22983e-26	5.29774e-24
Ets + HSF_DNA-bind	Ets	HSF_DNA-bind	2	4070	478	26529	0.0272951	0.00329331	0.0991374	1.39076e-26	5.92585e-24
BTB + HLH	BTB	HLH	12	1381	1995	27691	0.120614	0.0620549	0.211872	1.98745e-26	8.37723e-24
Forkhead + TEA	Forkhead	TEA	5	2274	988	27812	0.0618859	0.0200288	0.145163	2.58958e-26	1.06854e-23
Forkhead + YBD	Forkhead	YBD	5	2274	988	27812	0.0618859	0.0200288	0.145163	2.58958e-26	1.06854e-23
G-patch + Homeodomain	G-patch	Homeodomain	17	314	8598	22150	0.139478	0.080173	0.227121	2.69116e-26	1.09889e-23
HLH + SAM_PNT	HLH	SAM_PNT	15	1992	1463	27609	0.142109	0.0791927	0.235777	5.29265e-26	2.13889e-23
CUT + zf-C2H2	CUT	zf-C2H2	56	967	4942	25114	0.294295	0.220259	0.3862	5.68129e-26	2.27252e-23
DUF4074 + Homeodomain	DUF4074	Homeodomain	16	300	8599	22164	0.13747	0.0775128	0.227125	2.43488e-25	9.64116e-23
STAT_alpha + STAT_bind	STAT_alpha	STAT_bind	18	92	92	30877	65.5687	35.7629	115.103	2.69965e-25	1.03751e-22
STAT_alpha + STAT_int	STAT_alpha	STAT_int	18	92	92	30877	65.5687	35.7629	115.103	2.69965e-25	1.03751e-22
STAT_bind + STAT_int	STAT_bind	STAT_int	18	92	92	30877	65.5687	35.7629	115.103	2.69965e-25	1.03751e-22
HLH + MH1	HLH	MH1	30	1977	1853	27219	0.222907	0.149506	0.320392	4.89479e-25	1.86287e-22
HLH + TEA	HLH	TEA	3	2004	990	28082	0.0424849	0.00871117	0.124648	5.5152e-25	2.05901e-22
HLH + YBD	HLH	YBD	3	2004	990	28082	0.0424849	0.00871117	0.124648	5.5152e-25	2.05901e-22
Forkhead + MH1	Forkhead	MH1	40	2239	1843	26957	0.261314	0.185539	0.358448	8.84786e-25	3.27204e-22
MH2 + zf-C2H2	MH2	zf-C2H2	1	337	4997	25744	0.015298	0.000390796	0.0857949	1.35742e-24	4.97297e-22
HMG_box + Homeodomain	HMG_box	Homeodomain	197	1058	8418	21406	0.473496	0.403785	0.553017	1.63597e-24	5.93797e-22
Homeodomain + RFX5_DNA_bdg	Homeodomain	RFX5_DNA_bdg	13	8602	273	22191	0.122848	0.0645449	0.213799	2.22485e-24	7.92857e-22
Homeodomain + RFX5_N	Homeodomain	RFX5_N	13	8602	273	22191	0.122848	0.0645449	0.213799	2.22485e-24	7.92857e-22
HNF_C + zf-C2H2	HNF_C	zf-C2H2	24	632	4974	25449	0.194299	0.123442	0.292172	3.02752e-24	1.06918e-21
SH2 + STAT_alpha	SH2	STAT_alpha	18	111	92	30858	54.2984	29.7936	94.51	5.65489e-24	1.94449e-21
SH2 + STAT_bind	SH2	STAT_bind	18	111	92	30858	54.2984	29.7936	94.51	5.65489e-24	1.94449e-21
SH2 + STAT_int	SH2	STAT_int	18	111	92	30858	54.2984	29.7936	94.51	5.65489e-24	1.94449e-21
Elf-1_N + zf-C2H2	Elf-1_N	zf-C2H2	42	802	4956	25279	0.267124	0.190736	0.365009	6.26614e-24	2.13594e-21
Forkhead_N + RFX_DNA_binding	Forkhead_N	RFX_DNA_binding	2	931	1950	28196	0.0310732	0.00372389	0.112675	6.68714e-24	2.25979e-21
Ets + GATA	Ets	GATA	22	4050	753	26254	0.1894	0.117848	0.289353	1.18525e-23	3.9711e-21
CTF_NFI + SAM_PNT	CTF_NFI	SAM_PNT	8	1540	1470	28061	0.0991674	0.0426524	0.196448	2.6042e-23	8.57854e-21
NfI_DNAbd_pre-N + SAM_PNT	NfI_DNAbd_pre-N	SAM_PNT	8	1540	1470	28061	0.0991674	0.0426524	0.196448	2.6042e-23	8.57854e-21
BTB + HMG_box	BTB	HMG_box	2	1391	1253	28433	0.032637	0.00397171	0.11834	1.01039e-22	3.30061e-20
CUT + RFX_DNA_binding	CUT	RFX_DNA_binding	5	1018	1947	28109	0.0709028	0.0229546	0.166299	1.26957e-22	4.11299e-20
Ets + Pou	Ets	Pou	9	4063	540	26467	0.108573	0.049338	0.207883	2.24132e-22	7.20161e-20
BTB + RFX_DNA_binding	BTB	RFX_DNA_binding	16	1377	1936	27750	0.166555	0.094714	0.272199	5.47824e-22	1.74591e-19
MH1 + TEA	MH1	TEA	4	1879	989	28207	0.0606919	0.0164881	0.156235	6.1025e-22	1.91374e-19
MH1 + YBD	MH1	YBD	4	1879	989	28207	0.0606919	0.0164881	0.156235	6.1025e-22	1.91374e-19
Ets + KRAB	Ets	KRAB	11	4061	558	26449	0.128395	0.0636389	0.2318	8.71264e-22	2.7106e-19
GATA + zf-C2H2	GATA	zf-C2H2	39	736	4959	25345	0.270829	0.190738	0.37444	1.13498e-21	3.50323e-19
Homeodomain + IRF	Homeodomain	IRF	6	8609	204	22260	0.0760518	0.0275584	0.168487	1.19385e-21	3.65615e-19
DUF3528 + Homeodomain	DUF3528	Homeodomain	10	232	8605	22232	0.111366	0.0526757	0.208653	1.57492e-21	4.78582e-19
Homeodomain + PBC	Homeodomain	PBC	16	8599	262	22202	0.157677	0.0887309	0.261146	7.04849e-21	2.12539e-18
Vasculin + zf-C2H2	Vasculin	zf-C2H2	1	289	4997	25792	0.0178737	0.000455352	0.100346	8.10409e-21	2.42504e-18
SWIRM + zf-C2H2	SWIRM	zf-C2H2	9	405	4989	25676	0.114371	0.0518664	0.2195	1.35734e-20	4.03089e-18
Proteasome + zf-C2H2	Proteasome	zf-C2H2	40	15	4958	26066	14.0176	7.56778	27.307	1.4748e-20	4.34677e-18
CTF_NFI + HLH	CTF_NFI	HLH	25	1523	1982	27549	0.228168	0.146796	0.339216	1.80181e-20	5.23192e-18
HLH + NfI_DNAbd_pre-N	HLH	NfI_DNAbd_pre-N	25	1982	1523	27549	0.228168	0.146796	0.339216	1.80181e-20	5.23192e-18
Homeodomain + T-box	Homeodomain	T-box	47	8568	413	22051	0.29287	0.211631	0.397167	2.48068e-20	7.15019e-18
GABP-alpha + Homeodomain	GABP-alpha	Homeodomain	3	169	8612	22295	0.0459575	0.00936697	0.136671	3.82111e-20	1.09334e-17
Ets + Myb_DNA-binding	Ets	Myb_DNA-binding	24	4048	698	26309	0.223476	0.142001	0.335849	9.42613e-20	2.67757e-17
HMG_box + RFX_DNA_binding	HMG_box	RFX_DNA_binding	15	1240	1937	27887	0.174162	0.0970058	0.289152	1.73484e-19	4.89249e-17
BTB + MH1	BTB	MH1	18	1375	1865	27821	0.195288	0.115133	0.310732	2.00482e-19	5.6135e-17
Homeodomain + Hormone_recep	Homeodomain	Hormone_recep	52	8563	426	22038	0.314133	0.230634	0.42019	2.17957e-19	6.01685e-17
Homeodomain + zf-C4	Homeodomain	zf-C4	52	8563	426	22038	0.314133	0.230634	0.42019	2.17957e-19	6.01685e-17
Ets + LIM	Ets	LIM	16	4056	583	26424	0.178799	0.101407	0.293251	2.46055e-19	6.74501e-17
Homeodomain + bZIP_2	Homeodomain	bZIP_2	3	8612	161	22303	0.0482583	0.00983611	0.143642	4.04285e-19	1.10055e-16
HSF_DNA-bind + zf-C2H2	HSF_DNA-bind	zf-C2H2	16	464	4982	25617	0.177313	0.100412	0.291392	4.93767e-19	1.33487e-16
JAB + zf-C2H2	JAB	zf-C2H2	8	365	4990	25716	0.112957	0.0483889	0.225153	9.24887e-19	2.48326e-16
CTF_NFI + Forkhead	CTF_NFI	Forkhead	36	1512	2243	27288	0.28967	0.201535	0.404186	1.14503e-18	3.03279e-16
Forkhead + NfI_DNAbd_pre-N	Forkhead	NfI_DNAbd_pre-N	36	2243	1512	27288	0.28967	0.201535	0.404186	1.14503e-18	3.03279e-16
Cpn60_TCP1 + P53_TAD	Cpn60_TCP1	P53_TAD	8	7	57	31007	623.197	187.005	1914.08	1.48877e-18	3.89066e-16
Cpn60_TCP1 + TAD2	Cpn60_TCP1	TAD2	8	7	57	31007	623.197	187.005	1914.08	1.48877e-18	3.89066e-16
E2F_CC-MB + zf-C2H2	E2F_CC-MB	zf-C2H2	7	349	4991	25732	0.103413	0.0412637	0.215534	1.8334e-18	4.75956e-16
BTB + SAM_PNT	BTB	SAM_PNT	10	1383	1468	28218	0.138992	0.0663655	0.257137	1.85481e-18	4.78346e-16
Homeodomain + Myb_DNA-binding	Homeodomain	Myb_DNA-binding	102	8513	620	21844	0.422151	0.338446	0.522104	2.05362e-18	5.26157e-16
CTF_NFI + TEA	CTF_NFI	TEA	3	1545	990	28541	0.0560047	0.0115223	0.164394	2.58839e-18	6.46274e-16
CTF_NFI + YBD	CTF_NFI	YBD	3	1545	990	28541	0.0560047	0.0115223	0.164394	2.58839e-18	6.46274e-16
NfI_DNAbd_pre-N + TEA	NfI_DNAbd_pre-N	TEA	3	1545	990	28541	0.0560047	0.0115223	0.164394	2.58839e-18	6.46274e-16
NfI_DNAbd_pre-N + YBD	NfI_DNAbd_pre-N	YBD	3	1545	990	28541	0.0560047	0.0115223	0.164394	2.58839e-18	6.46274e-16
CUTL + zf-C2H2	CUTL	zf-C2H2	38	663	4960	25418	0.293724	0.205693	0.408129	3.09284e-18	7.6251e-16
ULD + zf-C2H2	ULD	zf-C2H2	38	663	4960	25418	0.293724	0.205693	0.408129	3.09284e-18	7.6251e-16
MH1 + RFX1_trans_act	MH1	RFX1_trans_act	4	1879	845	28351	0.0714094	0.0193783	0.183853	3.11537e-18	7.63266e-16
GATA + RFX_DNA_binding	GATA	RFX_DNA_binding	3	772	1949	28355	0.0565654	0.0116326	0.166104	4.2356e-18	1.03128e-15
CTF_NFI + CTF_NFI	CTF_NFI	CTF_NFI	16	1532	1532	27999	0.190879	0.108536	0.312048	4.35215e-18	1.04665e-15
NfI_DNAbd_pre-N + NfI_DNAbd_pre-N	NfI_DNAbd_pre-N	NfI_DNAbd_pre-N	16	1532	1532	27999	0.190879	0.108536	0.312048	4.35215e-18	1.04665e-15
Cpn60_TCP1 + P53	Cpn60_TCP1	P53	8	7	66	30998	530.347	162.896	1862.46	4.43746e-18	1.05423e-15
Cpn60_TCP1 + P53_tetramer	Cpn60_TCP1	P53_tetramer	8	7	66	30998	530.347	162.896	1862.46	4.43746e-18	1.05423e-15
Homeodomain + SOXp	Homeodomain	SOXp	12	8603	208	22256	0.149253	0.0758607	0.266523	3.23163e-17	7.63132e-15
Ets + Ras	Ets	Ras	85	3987	168	26839	3.40576	2.58641	4.4567	3.74864e-17	8.79921e-15
Myosin_head + zf-C2H2	Myosin_head	zf-C2H2	16	430	4982	25651	0.191586	0.108424	0.315073	5.97947e-17	1.39521e-14
DLL_N + Ets	DLL_N	Ets	3	335	4069	26672	0.0587029	0.0120453	0.173194	8.81637e-17	2.04498e-14
Ets + JAB	Ets	JAB	5	4067	368	26639	0.0889981	0.0286976	0.209776	1.21065e-16	2.79161e-14
HLH + RFX1_trans_act	HLH	RFX1_trans_act	7	2000	842	28230	0.117349	0.0469822	0.243348	1.31199e-16	3.00759e-14
CTF_NFI + RFX1_trans_act	CTF_NFI	RFX1_trans_act	2	1546	847	28684	0.0438247	0.00530561	0.159013	1.47052e-16	3.33205e-14
NfI_DNAbd_pre-N + RFX1_trans_act	NfI_DNAbd_pre-N	RFX1_trans_act	2	1546	847	28684	0.0438247	0.00530561	0.159013	1.47052e-16	3.33205e-14
Ets + G-patch	Ets	G-patch	3	4069	328	26679	0.0599714	0.0123026	0.17695	1.92377e-16	4.33401e-14
Forkhead + KRAB	Forkhead	KRAB	2	2277	567	28233	0.0437564	0.00529401	0.1589	1.94563e-16	4.35822e-14
SAM_PNT + SAM_PNT	SAM_PNT	SAM_PNT	15	1463	1463	28138	0.1972	0.109792	0.327488	3.27e-16	7.28319e-14
Homeodomain + LIM	Homeodomain	LIM	83	8532	516	21948	0.413799	0.323689	0.523408	3.69746e-16	8.14272e-14
HNF_C + RFX_DNA_binding	HNF_C	RFX_DNA_binding	2	654	1950	28473	0.0446706	0.00540499	0.162198	3.69403e-16	8.14272e-14
Elf-1_N + Forkhead	Elf-1_N	Forkhead	11	833	2268	27967	0.162841	0.0808494	0.293485	4.13354e-16	9.05221e-14
Ets + SWIRM	Ets	SWIRM	8	4064	406	26601	0.12898	0.0552939	0.256866	4.37964e-16	9.53788e-14
CUT + HLH	CUT	HLH	13	1010	1994	28062	0.181146	0.095933	0.311946	4.81523e-16	1.04286e-13
Ets + PBC	Ets	PBC	1	4071	277	26730	0.0237192	0.000602422	0.133225	6.05327e-16	1.30378e-13
RFX1_trans_act + SAM_PNT	RFX1_trans_act	SAM_PNT	2	847	1476	28754	0.0460149	0.00556782	0.16697	1.07448e-15	2.30162e-13
E2F_TDP + zf-C2H2	E2F_TDP	zf-C2H2	12	365	4986	25716	0.169571	0.086737	0.300153	1.09605e-15	2.33506e-13
Ets + Vasculin	Ets	Vasculin	2	4070	288	26719	0.0455824	0.00550457	0.166302	2.90841e-15	6.16269e-13
CUT + MH1	CUT	MH1	12	1011	1871	28185	0.178808	0.0919315	0.314526	3.13468e-15	6.60642e-13
Elf-1_N + MH1	Elf-1_N	MH1	7	837	1876	28359	0.126428	0.0506163	0.262196	3.89336e-15	8.16148e-13
BTB + Forkhead_N	BTB	Forkhead_N	3	1390	930	28756	0.0667642	0.013721	0.196045	3.99001e-15	8.31959e-13
CUTL + RFX_DNA_binding	CUTL	RFX_DNA_binding	4	697	1948	28430	0.0837533	0.022757	0.215785	4.2845e-15	8.83959e-13
RFX_DNA_binding + ULD	RFX_DNA_binding	ULD	4	1948	697	28430	0.0837533	0.022757	0.215785	4.2845e-15	8.83959e-13
IRF + zf-C2H2	IRF	zf-C2H2	1	209	4997	25872	0.0247979	0.000628666	0.139595	6.82921e-15	1.4016e-12
BTB + BTB	BTB	BTB	13	1380	1380	28306	0.193231	0.102351	0.332709	9.04091e-15	1.83629e-12
Forkhead + RFX1_trans_act	Forkhead	RFX1_trans_act	13	2266	836	27964	0.191906	0.101582	0.330717	9.03098e-15	1.83629e-12
RRM_1 + zf-C2H2	RRM_1	zf-C2H2	151	358	4847	25723	2.23835	1.83369	2.7218	1.08867e-14	2.19978e-12
HMG_box + RRM_1	HMG_box	RRM_1	62	1193	447	29377	3.41522	2.55878	4.494	1.137e-14	2.28566e-12
DUF4074 + Ets	DUF4074	Ets	4	312	4068	26695	0.0841335	0.022794	0.217769	1.54495e-14	3.0899e-12
Elf-1_N + SAM_PNT	Elf-1_N	SAM_PNT	3	841	1475	28760	0.0695856	0.0143071	0.204388	1.77712e-14	3.53619e-12
CUTL + HLH	CUTL	HLH	5	696	2002	28376	0.101827	0.0329386	0.23919	1.79776e-14	3.54131e-12
HLH + ULD	HLH	ULD	5	2002	696	28376	0.101827	0.0329386	0.23919	1.79776e-14	3.54131e-12
Homeodomain + SH2	Homeodomain	SH2	3	8612	126	22338	0.0617601	0.0125678	0.184717	1.9773e-14	3.87551e-12
CEBP1_N + RRM_1	CEBP1_N	RRM_1	21	121	488	30449	10.8237	6.41222	17.4886	2.19106e-14	4.23102e-12
CEBP_ZZ + RRM_1	CEBP_ZZ	RRM_1	21	121	488	30449	10.8237	6.41222	17.4886	2.19106e-14	4.23102e-12
RRM_1 + RRM_7	RRM_1	RRM_7	21	488	121	30449	10.8237	6.41222	17.4886	2.19106e-14	4.23102e-12
HNF-1B_C + Homeodomain	HNF-1B_C	Homeodomain	6	147	8609	22317	0.105811	0.0381796	0.236003	2.3589e-14	4.53278e-12
HLH + HLH	HLH	HLH	56	1951	1951	27121	0.399014	0.299081	0.522729	2.48527e-14	4.75232e-12
PBC + zf-C2H2	PBC	zf-C2H2	6	272	4992	25809	0.114049	0.0414891	0.251672	3.08671e-14	5.87374e-12
BTB + TEA	BTB	TEA	5	1388	988	28698	0.104638	0.0338429	0.245636	3.27419e-14	6.17059e-12
BTB + YBD	BTB	YBD	5	1388	988	28698	0.104638	0.0338429	0.245636	3.27419e-14	6.17059e-12
Elf-1_N + RFX_DNA_binding	Elf-1_N	RFX_DNA_binding	9	835	1943	28292	0.156949	0.071399	0.300035	3.7969e-14	7.12145e-12
E2F_TDP + Ets	E2F_TDP	Ets	8	369	4064	26638	0.14211	0.060869	0.283277	4.15468e-14	7.75506e-12
CUT + SAM_PNT	CUT	SAM_PNT	7	1016	1471	28585	0.133888	0.0536124	0.277584	4.17428e-14	7.75506e-12
Forkhead_N + SAM_PNT	Forkhead_N	SAM_PNT	5	928	1473	28673	0.104883	0.03392	0.246241	4.9246e-14	9.10587e-12
DUF3446 + Homeodomain	DUF3446	Homeodomain	4	129	8611	22335	0.0804301	0.0215828	0.211072	6.72285e-14	1.23726e-11
BTB + CTF_NFI	BTB	CTF_NFI	18	1375	1530	28156	0.240913	0.141941	0.383556	6.95801e-14	1.26862e-11
BTB + NfI_DNAbd_pre-N	BTB	NfI_DNAbd_pre-N	18	1375	1530	28156	0.240913	0.141941	0.383556	6.95801e-14	1.26862e-11
E2F_CC-MB + Ets	E2F_CC-MB	Ets	7	349	4065	26658	0.131539	0.0524757	0.274193	8.53634e-14	1.54919e-11
Homeodomain + zf_C2H2_ZHX	Homeodomain	zf_C2H2_ZHX	27	8588	253	22211	0.275997	0.178196	0.411634	9.86644e-14	1.78233e-11
PAX + RFX_DNA_binding	PAX	RFX_DNA_binding	2	563	1950	28564	0.052058	0.00628891	0.189136	1.29507e-13	2.32876e-11
Myb_DNA-binding + RFX_DNA_binding	Myb_DNA-binding	RFX_DNA_binding	6	716	1946	28411	0.122348	0.0446958	0.268129	1.38953e-13	2.4872e-11
LIM + zf-C2H2	LIM	zf-C2H2	37	562	4961	25519	0.338663	0.235631	0.473367	1.54253e-13	2.7485e-11
Ank_2 + Homeodomain	Ank_2	Homeodomain	86	492	8529	21972	0.450313	0.353356	0.568104	2.21361e-13	3.9264e-11
Ets + Hormone_recep	Ets	Hormone_recep	16	4056	462	26545	0.22666	0.128307	0.372559	2.76496e-13	4.86037e-11
Ets + zf-C4	Ets	zf-C4	16	4056	462	26545	0.22666	0.128307	0.372559	2.76496e-13	4.86037e-11
Elf-1_N + HLH	Elf-1_N	HLH	11	833	1996	28239	0.186831	0.0927288	0.336779	2.80817e-13	4.91429e-11
LIM + SSDP	LIM	SSDP	17	582	67	30413	13.2599	7.24728	23.0036	4.3154e-13	7.51525e-11
GATA + HLH	GATA	HLH	9	766	1998	28306	0.16646	0.0757146	0.318344	4.33277e-13	7.51525e-11
CUT + Forkhead	CUT	Forkhead	23	1000	2256	27800	0.283429	0.178419	0.428903	4.82974e-13	8.34035e-11
RFX5_DNA_bdg + zf-C2H2	RFX5_DNA_bdg	zf-C2H2	8	278	4990	25803	0.148809	0.0635846	0.297583	5.35572e-13	9.16788e-11
RFX5_N + zf-C2H2	RFX5_N	zf-C2H2	8	278	4990	25803	0.148809	0.0635846	0.297583	5.35572e-13	9.16788e-11
CTF_NFI + MH1	CTF_NFI	MH1	35	1513	1848	27683	0.346537	0.239653	0.485998	6.99665e-13	1.18383e-10
MH1 + NfI_DNAbd_pre-N	MH1	NfI_DNAbd_pre-N	35	1848	1513	27683	0.346537	0.239653	0.485998	6.99665e-13	1.18383e-10
IQ + zf-C2H2	IQ	zf-C2H2	11	311	4987	25770	0.182776	0.0902243	0.331914	7.00636e-13	1.18383e-10
HLH + HSF_DNA-bind	HLH	HSF_DNA-bind	1	2006	479	28593	0.0297648	0.000755866	0.166799	7.07342e-13	1.19004e-10
Homeodomain + TF_Otx	Homeodomain	TF_Otx	25	8590	235	22229	0.275286	0.174447	0.416987	7.99601e-13	1.3395e-10
Ets + MH2	Ets	MH2	7	4065	331	26676	0.138785	0.0553434	0.289464	8.48248e-13	1.41495e-10
Ets + TF_AP-2	Ets	TF_AP-2	5	4067	298	26709	0.110192	0.0355271	0.260292	9.98338e-13	1.65826e-10
BTB + RFX1_trans_act	BTB	RFX1_trans_act	4	1389	845	28841	0.0982849	0.026684	0.253185	1.5949e-12	2.63797e-10
Ank + RHD_dimer	Ank	RHD_dimer	10	194	43	30832	36.9428	16.3128	76.1447	1.8142e-12	2.95089e-10
Ank + RHD_DNA_bind	Ank	RHD_DNA_bind	10	194	43	30832	36.9428	16.3128	76.1447	1.8142e-12	2.95089e-10
CUTL + MH1	CUTL	MH1	6	695	1877	28501	0.131092	0.0478856	0.287351	1.81256e-12	2.95089e-10
MH1 + ULD	MH1	ULD	6	1877	695	28501	0.131092	0.0478856	0.287351	1.81256e-12	2.95089e-10
HMG_box + TEA	HMG_box	TEA	5	1250	988	28836	0.116748	0.0377463	0.274143	1.97972e-12	3.18054e-10
HMG_box + YBD	HMG_box	YBD	5	1250	988	28836	0.116748	0.0377463	0.274143	1.97972e-12	3.18054e-10
Ets + TF_Otx	Ets	TF_Otx	3	4069	257	26750	0.076743	0.0157017	0.227013	1.96742e-12	3.18054e-10
Myb_DNA-binding + zf-C2H2	Myb_DNA-binding	zf-C2H2	53	669	4945	25412	0.407125	0.301273	0.539976	2.02011e-12	3.23218e-10
Basic + Homeodomain	Basic	Homeodomain	1	95	8614	22369	0.0273361	0.000689387	0.156084	2.22167e-12	3.52589e-10
Homeodomain + Myf5	Homeodomain	Myf5	1	8614	95	22369	0.0273361	0.000689387	0.156084	2.22167e-12	3.52589e-10
Ets + SOXp	Ets	SOXp	1	4071	219	26788	0.0300701	0.000761525	0.169253	2.57026e-12	4.06267e-10
Ets + Vert_HS_TF	Ets	Vert_HS_TF	2	4070	237	26770	0.0555074	0.00668603	0.202864	2.97224e-12	4.6792e-10
CTF_NFI + Elf-1_N	CTF_NFI	Elf-1_N	6	1542	838	28693	0.133233	0.0486833	0.291912	3.0455e-12	4.75631e-10
Elf-1_N + NfI_DNAbd_pre-N	Elf-1_N	NfI_DNAbd_pre-N	6	838	1542	28693	0.133233	0.0486833	0.291912	3.0455e-12	4.75631e-10
FOXP-CC + zf-C2H2	FOXP-CC	zf-C2H2	23	416	4975	25665	0.285228	0.178595	0.434464	3.07901e-12	4.78957e-10
Ets + GCM	Ets	GCM	2	4070	238	26769	0.0552721	0.00665798	0.201996	3.12026e-12	4.83455e-10
RHD_dimer + RHD_dimer	RHD_dimer	RHD_dimer	7	46	46	30980	102.179	37.0024	246.079	4.03091e-12	6.19653e-10
RHD_DNA_bind + RHD_DNA_bind	RHD_DNA_bind	RHD_DNA_bind	7	46	46	30980	102.179	37.0024	246.079	4.03091e-12	6.19653e-10
Pkinase + zf-C2H2	Pkinase	zf-C2H2	24	421	4974	25660	0.294096	0.186103	0.444235	4.54225e-12	6.95531e-10
HLH + PAX	HLH	PAX	4	2003	561	28511	0.101494	0.0275452	0.261756	5.29122e-12	8.07066e-10
HSF_DNA-bind + MH1	HSF_DNA-bind	MH1	1	479	1882	28717	0.0318632	0.000808782	0.178568	5.52011e-12	8.38714e-10
Pou + zf-C2H2	Pou	zf-C2H2	35	514	4963	25567	0.350791	0.241304	0.495091	6.11289e-12	9.25194e-10
HLH + HMG_box	HLH	HMG_box	29	1978	1226	27846	0.333007	0.221433	0.482333	6.48506e-12	9.77748e-10
CTF_NFI + CUT	CTF_NFI	CUT	11	1537	1012	28519	0.20169	0.100141	0.363497	7.73771e-12	1.1577e-09
CUT + NfI_DNAbd_pre-N	CUT	NfI_DNAbd_pre-N	11	1012	1537	28519	0.20169	0.100141	0.363497	7.73771e-12	1.1577e-09
GATA + MH1	GATA	MH1	9	766	1874	28430	0.178252	0.0810625	0.340942	7.86771e-12	1.17268e-09
Ets + IRF	Ets	IRF	1	4071	209	26798	0.0315215	0.000797847	0.177532	8.43322e-12	1.25221e-09
HNF-1A_C + HSP70	HNF-1A_C	HSP70	6	23	48	31002	167.697	53.5771	453.952	9.51248e-12	1.40713e-09
KRAB + RFX_DNA_binding	KRAB	RFX_DNA_binding	4	565	1948	28562	0.103807	0.0281319	0.267711	1.14809e-11	1.69192e-09
Death + RHD_dimer	Death	RHD_dimer	7	55	46	30971	85.5312	31.1988	201.639	1.27115e-11	1.85929e-09
Death + RHD_DNA_bind	Death	RHD_DNA_bind	7	55	46	30971	85.5312	31.1988	201.639	1.27115e-11	1.85929e-09
Homeodomain + Hox9_act	Homeodomain	Hox9_act	26	8589	227	22237	0.296526	0.189464	0.44637	1.50581e-11	2.19435e-09
CUTL + Forkhead	CUTL	Forkhead	12	689	2267	28111	0.215973	0.110876	0.380515	1.94731e-11	2.81678e-09
Forkhead + ULD	Forkhead	ULD	12	2267	689	28111	0.215973	0.110876	0.380515	1.94731e-11	2.81678e-09
DUF3528 + Ets	DUF3528	Ets	3	239	4069	26768	0.0825784	0.0168996	0.24448	2.12736e-11	3.0659e-09
Homeodomain + POU2F1_C	Homeodomain	POU2F1_C	29	8586	238	22226	0.315405	0.206574	0.465392	2.16721e-11	3.11189e-09
CH + zf-C2H2	CH	zf-C2H2	6	229	4992	25852	0.13569	0.0492614	0.300153	2.41565e-11	3.45597e-09
HMG_box + SAM_PNT	HMG_box	SAM_PNT	17	1238	1461	28363	0.266588	0.154355	0.430154	2.94634e-11	4.19988e-09
HNF-1_N + Homeodomain	HNF-1_N	Homeodomain	11	150	8604	22314	0.190187	0.0928893	0.35041	3.55241e-11	5.04545e-09
Proteasome_A_N + zf-C2H2	Proteasome_A_N	zf-C2H2	20	7	4978	26074	14.9631	6.0741	41.9361	3.61609e-11	5.11735e-09
HLH + KRAB	HLH	KRAB	5	2002	564	28508	0.126243	0.040786	0.296873	3.97108e-11	5.59951e-09
PDZ + zf-C2H2	PDZ	zf-C2H2	7	235	4991	25846	0.154259	0.061319	0.323142	5.24822e-11	7.37385e-09
Homeodomain + Pax2_C	Homeodomain	Pax2_C	11	8604	148	22316	0.192774	0.094126	0.355317	5.27811e-11	7.38936e-09
Elf-1_N + TEA	Elf-1_N	TEA	1	843	992	29243	0.0349748	0.000887713	0.195835	5.31744e-11	7.39162e-09
Elf-1_N + YBD	Elf-1_N	YBD	1	843	992	29243	0.0349748	0.000887713	0.195835	5.31744e-11	7.39162e-09
Elf-1_N + HMG_box	Elf-1_N	HMG_box	4	840	1251	28984	0.110326	0.0299414	0.284274	6.7066e-11	9.28971e-09
BTB + PHD	BTB	PHD	5	1388	804	28882	0.129409	0.0418374	0.304	7.42653e-11	1.02507e-08
Forkhead_N + MH1	Forkhead_N	MH1	16	917	1867	28279	0.26429	0.150084	0.43274	8.49339e-11	1.16821e-08
Ets + T-box	Ets	T-box	19	4053	441	26566	0.282407	0.168218	0.446979	8.62762e-11	1.18253e-08
HNF_C + SAM_PNT	HNF_C	SAM_PNT	3	653	1475	28948	0.0901462	0.0185342	0.265226	1.0577e-10	1.44466e-08
PH + zf-C2H2	PH	zf-C2H2	5	207	4993	25874	0.125174	0.0401998	0.297072	1.0816e-10	1.47218e-08
RFX_DNA_binding + SWIRM	RFX_DNA_binding	SWIRM	1	1951	413	28714	0.0356453	0.000903898	0.199908	1.206e-10	1.63582e-08
Ets + FOXP-CC	Ets	FOXP-CC	18	4054	421	26586	0.280395	0.164377	0.449265	2.09549e-10	2.83252e-08
STAT_alpha + STAT_alpha	STAT_alpha	STAT_alpha	9	101	101	30868	27.2229	11.7648	55.7292	2.15382e-10	2.88156e-08
STAT_bind + STAT_bind	STAT_bind	STAT_bind	9	101	101	30868	27.2229	11.7648	55.7292	2.15382e-10	2.88156e-08
STAT_int + STAT_int	STAT_int	STAT_int	9	101	101	30868	27.2229	11.7648	55.7292	2.15382e-10	2.88156e-08
CUT + TEA	CUT	TEA	4	1019	989	29067	0.115368	0.0312926	0.297265	3.0939e-10	4.11121e-08
CUT + YBD	CUT	YBD	4	1019	989	29067	0.115368	0.0312926	0.297265	3.0939e-10	4.11121e-08
BTB + GATA	BTB	GATA	5	1388	770	28916	0.135282	0.0437316	0.317835	3.18137e-10	4.21316e-08
DUF3528 + zf-C2H2	DUF3528	zf-C2H2	8	234	4990	25847	0.177091	0.0755211	0.355067	3.28206e-10	4.33187e-08
Pou + RFX_DNA_binding	Pou	RFX_DNA_binding	5	544	1947	28583	0.134935	0.0435878	0.317371	3.71683e-10	4.88925e-08
Ets + Hox9_act	Ets	Hox9_act	5	4067	248	26759	0.132656	0.0426727	0.314075	4.51118e-10	5.91432e-08
HMG_box + RFX1_trans_act	HMG_box	RFX1_trans_act	5	1250	844	28980	0.13735	0.0444035	0.32271	4.67851e-10	6.11326e-08
HNF-1B_C + Pterin_4a	HNF-1B_C	Pterin_4a	4	149	0	30926	Inf	134.924	Inf	5.64701e-10	7.35285e-08
GATA + TEA	GATA	TEA	1	774	992	29312	0.0381826	0.000968586	0.213831	5.68345e-10	7.35285e-08
GATA + YBD	GATA	YBD	1	774	992	29312	0.0381826	0.000968586	0.213831	5.68345e-10	7.35285e-08
STAT1_TAZ2bind + STAT_alpha	STAT1_TAZ2bind	STAT_alpha	6	22	104	30947	81.1662	26.3208	212.844	6.05523e-10	7.75703e-08
STAT1_TAZ2bind + STAT_bind	STAT1_TAZ2bind	STAT_bind	6	22	104	30947	81.1662	26.3208	212.844	6.05523e-10	7.75703e-08
STAT1_TAZ2bind + STAT_int	STAT1_TAZ2bind	STAT_int	6	22	104	30947	81.1662	26.3208	212.844	6.05523e-10	7.75703e-08
Ank_2 + zf-C2H2	Ank_2	zf-C2H2	43	535	4955	25546	0.414381	0.295925	0.566834	6.83355e-10	8.72557e-08
HNF-1_N + Pterin_4a	HNF-1_N	Pterin_4a	4	157	0	30918	Inf	128.284	Inf	6.9377e-10	8.82981e-08
BTB + HNF_C	BTB	HNF_C	3	1390	653	29033	0.0959421	0.0197097	0.28229	7.17441e-10	9.10151e-08
PAX + SAM_PNT	PAX	SAM_PNT	2	563	1476	29038	0.0699126	0.00842505	0.254107	7.50798e-10	9.49396e-08
HLH + JAB	HLH	JAB	1	2006	372	28700	0.038471	0.000974907	0.215858	8.2487e-10	1.03971e-07
IRF + IRF-3	IRF	IRF-3	10	200	84	30785	18.3246	8.3512	36.0494	8.82982e-10	1.10939e-07
CUTL + SAM_PNT	CUTL	SAM_PNT	5	696	1473	28905	0.140976	0.045563	0.33135	8.91911e-10	1.11347e-07
SAM_PNT + ULD	SAM_PNT	ULD	5	1473	696	28905	0.140976	0.045563	0.33135	8.91911e-10	1.11347e-07
14-3-3 + FOXO_KIX_bdg	14-3-3	FOXO_KIX_bdg	6	11	209	30853	80.3932	24.192	238.718	1.18699e-09	1.47247e-07
14-3-3 + FOXO-TAD	14-3-3	FOXO-TAD	6	11	209	30853	80.3932	24.192	238.718	1.18699e-09	1.47247e-07
Myosin_head + zf_ZIC	Myosin_head	zf_ZIC	7	439	9	30624	54.1864	17.0812	164.574	1.22365e-09	1.51316e-07
zf-C2H2 + zf-CCCH_4	zf-C2H2	zf-CCCH_4	13	4985	276	25805	0.243828	0.128082	0.424369	1.35357e-09	1.66855e-07
HSP70 + P53_TAD	HSP70	P53_TAD	6	48	59	30966	65.4954	22.0588	160.801	1.57703e-09	1.93187e-07
HSP70 + TAD2	HSP70	TAD2	6	48	59	30966	65.4954	22.0588	160.801	1.57703e-09	1.93187e-07
SH2 + STAT1_TAZ2bind	SH2	STAT1_TAZ2bind	6	123	22	30928	68.4681	22.3171	177.915	1.58963e-09	1.94123e-07
Pou + SAM_PNT	Pou	SAM_PNT	2	547	1476	29054	0.0719975	0.00867732	0.26173	1.60439e-09	1.95318e-07
Band_7 + Homeodomain	Band_7	Homeodomain	8	119	8607	22345	0.174533	0.0735895	0.35541	1.62167e-09	1.9681e-07
Hormone_recep + zf-C2H2	Hormone_recep	zf-C2H2	33	445	4965	25636	0.382906	0.259958	0.546574	1.80232e-09	2.17387e-07
zf-C2H2 + zf-C4	zf-C2H2	zf-C4	33	4965	445	25636	0.382906	0.259958	0.546574	1.80232e-09	2.17387e-07
GATA + SAM_PNT	GATA	SAM_PNT	7	768	1471	28833	0.17866	0.0714356	0.370864	1.85603e-09	2.23179e-07
CTF_NFI + CUTL	CTF_NFI	CUTL	6	1542	695	28836	0.161447	0.0589557	0.354036	1.9075e-09	2.26588e-07
CTF_NFI + ULD	CTF_NFI	ULD	6	1542	695	28836	0.161447	0.0589557	0.354036	1.9075e-09	2.26588e-07
CUTL + NfI_DNAbd_pre-N	CUTL	NfI_DNAbd_pre-N	6	695	1542	28836	0.161447	0.0589557	0.354036	1.9075e-09	2.26588e-07
NfI_DNAbd_pre-N + ULD	NfI_DNAbd_pre-N	ULD	6	1542	695	28836	0.161447	0.0589557	0.354036	1.9075e-09	2.26588e-07
bZIP_1 + zf-C2H2	bZIP_1	zf-C2H2	3	163	4995	25918	0.0955024	0.0194803	0.284264	1.99395e-09	2.36141e-07
PAX + zf-C2H2	PAX	zf-C2H2	43	522	4955	25559	0.424917	0.303363	0.581445	2.03412e-09	2.40173e-07
CTF_NFI + NfI_DNAbd_pre-N	CTF_NFI	NfI_DNAbd_pre-N	32	1516	1516	28015	0.390078	0.264839	0.555555	2.23173e-09	2.62714e-07
Forkhead_N + HLH	Forkhead_N	HLH	21	912	1986	28160	0.326504	0.200641	0.50359	2.69231e-09	3.15984e-07
Ets + POU2F1_C	Ets	POU2F1_C	7	4065	260	26747	0.177154	0.0704493	0.370616	2.82258e-09	3.30284e-07
Ets + OAR	Ets	OAR	2	4070	186	26821	0.0708618	0.0085058	0.259758	2.85644e-09	3.33251e-07
Forkhead + GATA	Forkhead	GATA	19	2260	756	28044	0.31187	0.186332	0.491685	2.99849e-09	3.48786e-07
BTB + Bromodomain	BTB	Bromodomain	3	1390	613	29073	0.102348	0.0210549	0.301207	3.06772e-09	3.55783e-07
Prot_ATP_ID_OB + zf-C2H2	Prot_ATP_ID_OB	zf-C2H2	12	1	4986	26080	62.7602	9.28178	2643.55	3.27674e-09	3.78903e-07
BTB + Elf-1_N	BTB	Elf-1_N	8	1385	836	28850	0.199339	0.0855975	0.395742	3.42067e-09	3.94384e-07
HSP70 + P53	HSP70	P53	6	48	68	30957	56.8361	19.2316	139.361	3.49501e-09	4.00597e-07
HSP70 + P53_tetramer	HSP70	P53_tetramer	6	48	68	30957	56.8361	19.2316	139.361	3.49501e-09	4.00597e-07
BTB + PAX	BTB	PAX	2	1391	563	29123	0.0744011	0.00896894	0.270474	3.51404e-09	4.01604e-07
SH2 + SH2	SH2	SH2	9	120	120	30830	19.262	8.39976	38.9847	3.7141e-09	4.23234e-07
CTF_NFI + Forkhead_N	CTF_NFI	Forkhead_N	13	1535	920	28611	0.263385	0.139369	0.454063	4.17921e-09	4.73482e-07
Forkhead_N + NfI_DNAbd_pre-N	Forkhead_N	NfI_DNAbd_pre-N	13	920	1535	28611	0.263385	0.139369	0.454063	4.17921e-09	4.73482e-07
DLL_N + zf-C2H2	DLL_N	zf-C2H2	19	319	4979	25762	0.308184	0.182925	0.489913	6.14591e-09	6.94293e-07
WD40 + zf-C2H2	WD40	zf-C2H2	70	709	4928	25372	0.508332	0.391064	0.651845	6.29741e-09	7.09364e-07
KRAB + SAM_PNT	KRAB	SAM_PNT	3	566	1475	29035	0.104326	0.0214466	0.307115	6.37906e-09	7.16501e-07
MH1 + Pou	MH1	Pou	6	1877	543	28653	0.168682	0.0615539	0.370276	6.66256e-09	7.46207e-07
PHD + RFX_DNA_binding	PHD	RFX_DNA_binding	16	793	1936	28334	0.295298	0.167587	0.483851	6.87846e-09	7.68193e-07
CADH_Y-type_LIR + HoxA13_N	CADH_Y-type_LIR	HoxA13_N	5	29	57	30988	93.7019	27.3106	257.837	7.13082e-09	7.94114e-07
HLH + SIX1_SD	HLH	SIX1_SD	8	1999	562	28510	0.203025	0.0871066	0.403633	7.76055e-09	8.61795e-07
Forkhead + Hormone_recep	Forkhead	Hormone_recep	7	2272	471	28329	0.185316	0.073994	0.385486	7.88057e-09	8.70192e-07
Forkhead + zf-C4	Forkhead	zf-C4	7	2272	471	28329	0.185316	0.073994	0.385486	7.88057e-09	8.70192e-07
CTF_NFI + GATA	CTF_NFI	GATA	9	1539	766	28765	0.219609	0.099832	0.420231	8.08043e-09	8.84785e-07
GATA + NfI_DNAbd_pre-N	GATA	NfI_DNAbd_pre-N	9	766	1539	28765	0.219609	0.099832	0.420231	8.08043e-09	8.84785e-07
HSP70 + pKID	HSP70	pKID	4	50	10	31015	247.904	54.6456	874.917	8.04081e-09	8.84785e-07
TF_AP-2 + zf-C2H2	TF_AP-2	zf-C2H2	16	287	4982	25794	0.288644	0.162626	0.477425	9.68974e-09	1.05804e-06
KRAB + MH1	KRAB	MH1	7	562	1876	28634	0.190118	0.075965	0.395127	1.26969e-08	1.38255e-06
Cadherin + HoxA13_N	Cadherin	HoxA13_N	5	33	57	30984	82.1924	24.1795	224.621	1.27848e-08	1.38826e-06
MH1 + SIX1_SD	MH1	SIX1_SD	7	1876	563	28633	0.189774	0.0758278	0.394401	1.28942e-08	1.39628e-06
Ets + Sugar_tr	Ets	Sugar_tr	10	4062	1	27006	66.4846	9.45022	2837.93	1.43111e-08	1.54544e-06
CTF_NFI + SIX1_SD	CTF_NFI	SIX1_SD	4	1544	566	28965	0.132581	0.0359504	0.342057	1.48027e-08	1.58977e-06
NfI_DNAbd_pre-N + SIX1_SD	NfI_DNAbd_pre-N	SIX1_SD	4	1544	566	28965	0.132581	0.0359504	0.342057	1.48027e-08	1.58977e-06
BTB + Myb_DNA-binding	BTB	Myb_DNA-binding	6	1387	716	28970	0.175034	0.0638888	0.383894	1.56434e-08	1.67547e-06
DIL + zf-C2H2	DIL	zf-C2H2	4	163	4994	25918	0.127362	0.034258	0.332614	1.66176e-08	1.77496e-06
G-patch + RFX_DNA_binding	G-patch	RFX_DNA_binding	1	330	1951	28797	0.0447411	0.00113262	0.251258	1.76963e-08	1.88504e-06
HLH + Pou	HLH	Pou	8	1999	541	28531	0.211061	0.0905051	0.419717	2.12308e-08	2.25541e-06
BTB + T-box	BTB	T-box	1	1392	459	29227	0.0457533	0.00115897	0.256584	2.18574e-08	2.3157e-06
ARID + RFX_DNA_binding	ARID	RFX_DNA_binding	15	745	1937	28382	0.295025	0.16395	0.491056	2.21597e-08	2.3414e-06
CUT + Elf-1_N	CUT	Elf-1_N	4	1019	840	29216	0.136534	0.0370413	0.351993	2.32637e-08	2.45145e-06
CUT + RFX1_trans_act	CUT	RFX1_trans_act	4	1019	845	29211	0.135703	0.0368128	0.349836	2.39133e-08	2.51314e-06
E2F_CC-MB + HLH	E2F_CC-MB	HLH	2	354	2005	28718	0.080904	0.00975072	0.294897	2.58733e-08	2.71185e-06
Homeodomain + P53_TAD	Homeodomain	P53_TAD	1	8614	64	22400	0.0406332	0.00101727	0.234732	2.99075e-08	3.11802e-06
Homeodomain + TAD2	Homeodomain	TAD2	1	8614	64	22400	0.0406332	0.00101727	0.234732	2.99075e-08	3.11802e-06
Elf-1_N + Forkhead_N	Elf-1_N	Forkhead_N	3	841	930	29305	0.112388	0.0230832	0.330676	3.04747e-08	3.16872e-06
Bromodomain + RFX_DNA_binding	Bromodomain	RFX_DNA_binding	10	606	1942	28521	0.242356	0.115433	0.449831	3.195e-08	3.31334e-06
HMG_box + KRAB	HMG_box	KRAB	2	1253	567	29257	0.0823885	0.00993517	0.299546	3.46104e-08	3.57975e-06
Forkhead + SIX1_SD	Forkhead	SIX1_SD	12	2267	558	28242	0.267918	0.137381	0.472777	3.7142e-08	3.83149e-06
Ets + GrpE	Ets	GrpE	17	4055	14	26993	8.08414	3.74628	17.7256	4.05568e-08	4.17277e-06
Homeodomain + IRF-3	Homeodomain	IRF-3	5	8610	89	22375	0.145999	0.0462612	0.353829	4.50713e-08	4.62512e-06
Ets + RFX5_DNA_bdg	Ets	RFX5_DNA_bdg	10	4062	276	26731	0.238439	0.112975	0.445711	4.65825e-08	4.7553e-06
Ets + RFX5_N	Ets	RFX5_N	10	4062	276	26731	0.238439	0.112975	0.445711	4.65825e-08	4.7553e-06
Ras + SAM_PNT	Ras	SAM_PNT	34	219	1444	29382	3.15878	2.12495	4.5689	5.06582e-08	5.15792e-06
CUTL + TEA	CUTL	TEA	2	699	991	29387	0.0848711	0.0102375	0.308486	5.16711e-08	5.20696e-06
CUTL + YBD	CUTL	YBD	2	699	991	29387	0.0848711	0.0102375	0.308486	5.16711e-08	5.20696e-06
TEA + ULD	TEA	ULD	2	991	699	29387	0.0848711	0.0102375	0.308486	5.16711e-08	5.20696e-06
ULD + YBD	ULD	YBD	2	699	991	29387	0.0848711	0.0102375	0.308486	5.16711e-08	5.20696e-06
LIM + MH1	LIM	MH1	9	590	1874	28606	0.232857	0.105785	0.446094	5.31924e-08	5.34652e-06
E2F_CC-MB + RFX_DNA_binding	E2F_CC-MB	RFX_DNA_binding	2	354	1950	28773	0.0833461	0.0100457	0.303807	5.88985e-08	5.90491e-06
Forkhead + SWIRM	Forkhead	SWIRM	6	2273	408	28392	0.183696	0.0669307	0.403962	6.35635e-08	6.35635e-06
E2F_TDP + HLH	E2F_TDP	HLH	3	374	2004	28698	0.114873	0.0235583	0.33882	6.76536e-08	6.74814e-06
Myb_DNA-binding + SAM_PNT	Myb_DNA-binding	SAM_PNT	8	714	1470	28887	0.220185	0.0945019	0.437427	6.9789e-08	6.94348e-06
BTB + FOXP-CC	BTB	FOXP-CC	1	1392	438	29248	0.0479816	0.00121506	0.269149	7.14014e-08	7.08591e-06
Myosin_TH1 + zf-C2H2	Myosin_TH1	zf-C2H2	3	140	4995	25941	0.111291	0.0226533	0.332242	7.26783e-08	7.19442e-06
EF-hand_7 + zf-C2H2	EF-hand_7	zf-C2H2	5	165	4993	25916	0.157292	0.0503835	0.374826	8.01368e-08	7.91276e-06
CCDC47 + Ets	CCDC47	Ets	8	0	4064	27007	Inf	11.3367	Inf	8.63235e-08	8.50221e-06
SH2 + zf-C2H2	SH2	zf-C2H2	2	127	4996	25954	0.0818132	0.00979415	0.301861	9.47491e-08	9.30868e-06
BTB + Glyco_hydro_15	BTB	Glyco_hydro_15	7	1386	4	29682	37.4607	9.5107	174.898	1.00819e-07	9.85563e-06
BTB + KPBB_C	BTB	KPBB_C	7	1386	4	29682	37.4607	9.5107	174.898	1.00819e-07	9.85563e-06
ARID + BTB	ARID	BTB	8	752	1385	28934	0.22225	0.0953878	0.441479	1.02094e-07	9.95541e-06
Ribosomal_L44 + zf-C2H2	Ribosomal_L44	zf-C2H2	10	1	4988	26080	52.2832	7.43462	2240.91	1.07866e-07	1.04922e-05
CTF_NFI + LIM	CTF_NFI	LIM	6	1542	593	28938	0.189886	0.0692804	0.416755	1.1662e-07	1.12876e-05
LIM + NfI_DNAbd_pre-N	LIM	NfI_DNAbd_pre-N	6	593	1542	28938	0.189886	0.0692804	0.416755	1.1662e-07	1.12876e-05
RFX_DNA_binding + TF_AP-2	RFX_DNA_binding	TF_AP-2	1	1951	302	28825	0.0489376	0.00123805	0.275007	1.28594e-07	1.24159e-05
HLH + LIM	HLH	LIM	11	1996	588	28484	0.266973	0.132309	0.482317	1.32189e-07	1.27317e-05
PAX + TLE_N	PAX	TLE_N	19	546	226	30288	4.66338	2.73491	7.52302	1.41225e-07	1.35355e-05
JAB + RFX_DNA_binding	JAB	RFX_DNA_binding	3	370	1949	28757	0.119637	0.0245281	0.352912	1.41078e-07	1.35355e-05
CEBP1_N + KH_1	CEBP1_N	KH_1	7	135	80	30857	19.9977	7.64588	44.2623	1.54282e-07	1.46792e-05
CEBP_ZZ + KH_1	CEBP_ZZ	KH_1	7	135	80	30857	19.9977	7.64588	44.2623	1.54282e-07	1.46792e-05
KH_1 + RRM_7	KH_1	RRM_7	7	80	135	30857	19.9977	7.64588	44.2623	1.54282e-07	1.46792e-05
SOXp + zf-C2H2	SOXp	zf-C2H2	10	210	4988	25871	0.24699	0.116643	0.46376	1.57566e-07	1.49555e-05
GATA + RFX1_trans_act	GATA	RFX1_trans_act	2	773	847	29457	0.0900071	0.0108579	0.327202	1.59464e-07	1.5099e-05
HMG_box + MH1	HMG_box	MH1	36	1219	1847	27977	0.447343	0.310768	0.625252	1.68996e-07	1.5963e-05
Ank + Death	Ank	Death	7	197	55	30820	19.9026	7.54915	44.5752	1.71543e-07	1.61646e-05
T-box + zf-C2H2	T-box	zf-C2H2	36	424	4962	25657	0.439027	0.302919	0.618628	1.81504e-07	1.70622e-05
DLL_N + RFX_DNA_binding	DLL_N	RFX_DNA_binding	2	336	1950	28791	0.0878706	0.0105896	0.320402	1.84675e-07	1.73188e-05
Vert_HS_TF + zf-C2H2	Vert_HS_TF	zf-C2H2	12	227	4986	25854	0.27412	0.139456	0.488799	1.96049e-07	1.83415e-05
GCM + zf-C2H2	GCM	zf-C2H2	12	228	4986	25853	0.272908	0.138848	0.486592	2.01138e-07	1.87728e-05
HNF_C + MH1	HNF_C	MH1	12	644	1871	28552	0.28436	0.145866	0.501449	2.08384e-07	1.94029e-05
MH1 + SWIRM	MH1	SWIRM	4	1879	410	28786	0.149466	0.0404873	0.386302	2.22422e-07	2.0661e-05
BTB + SWIRM	BTB	SWIRM	1	1392	413	29273	0.0509298	0.00128925	0.285768	2.2718e-07	2.10531e-05
ARID + zf-C2H2	ARID	zf-C2H2	73	687	4925	25394	0.5479	0.423556	0.699693	2.30706e-07	2.13295e-05
DUF3446 + Ets	DUF3446	Ets	1	132	4071	26875	0.0500101	0.00126062	0.28371	2.34326e-07	2.16132e-05
Homeodomain + RRM_1	Homeodomain	RRM_1	91	8524	418	22046	0.563061	0.443164	0.708938	2.37836e-07	2.18854e-05
DLL_N + MH1	DLL_N	MH1	2	336	1881	28860	0.0913132	0.0110048	0.332977	2.54686e-07	2.3381e-05
HLH + PBC	HLH	PBC	1	2006	277	28795	0.0518388	0.00131078	0.291477	2.55865e-07	2.34343e-05
CTF_NFI + Pou	CTF_NFI	Pou	5	1543	544	28987	0.172672	0.0557623	0.406345	2.61526e-07	2.38414e-05
NfI_DNAbd_pre-N + Pou	NfI_DNAbd_pre-N	Pou	5	1543	544	28987	0.172672	0.0557623	0.406345	2.61526e-07	2.38414e-05
RFX_DNA_binding + zf-CCCH_4	RFX_DNA_binding	zf-CCCH_4	1	1951	288	28839	0.0513419	0.00129844	0.288607	2.67449e-07	2.43248e-05
Myb_DNA-binding + TEA	Myb_DNA-binding	TEA	3	719	990	29367	0.123758	0.025413	0.364234	2.70929e-07	2.45275e-05
Myb_DNA-binding + YBD	Myb_DNA-binding	YBD	3	719	990	29367	0.123758	0.025413	0.364234	2.70929e-07	2.45275e-05
HNF-1B_C + HSP70	HNF-1B_C	HSP70	6	147	48	30878	26.2565	9.03651	62.7001	2.74125e-07	2.47597e-05
Forkhead + MH2	Forkhead	MH2	4	2275	334	28466	0.149855	0.0405562	0.387839	2.75907e-07	2.48634e-05
Band_7_C + Ets	Band_7_C	Ets	10	3	4062	27004	22.1649	5.70166	124.995	2.89024e-07	2.59856e-05
E2F_TDP + SAM_PNT	E2F_TDP	SAM_PNT	1	376	1477	29225	0.0526366	0.00133203	0.295468	3.08088e-07	2.76363e-05
CUT + Forkhead_N	CUT	Forkhead_N	7	1016	926	29130	0.216743	0.0866711	0.450057	3.23275e-07	2.89324e-05
Forkhead + PBC	Forkhead	PBC	2	2277	276	28524	0.0907768	0.0109299	0.331449	3.31564e-07	2.96066e-05
Myc-LZ + SCA7	Myc-LZ	SCA7	4	113	12	30950	90.8867	21.0978	304.526	3.35242e-07	2.97993e-05
Myc_N + SCA7	Myc_N	SCA7	4	113	12	30950	90.8867	21.0978	304.526	3.35242e-07	2.97993e-05
Hormone_recep + SAM_PNT	Hormone_recep	SAM_PNT	3	475	1475	29126	0.124718	0.0255827	0.367461	3.50251e-07	3.09928e-05
SAM_PNT + zf-C4	SAM_PNT	zf-C4	3	1475	475	29126	0.124718	0.0255827	0.367461	3.50251e-07	3.09928e-05
Pax2_C + zf-C2H2	Pax2_C	zf-C2H2	5	154	4993	25927	0.168598	0.0539547	0.40234	3.512e-07	3.10069e-05
BTB + Pou	BTB	Pou	4	1389	545	29141	0.153985	0.0417451	0.39745	3.68865e-07	3.24933e-05
HNF-1_N + HSP70	HNF-1_N	HSP70	6	155	48	30870	24.8964	8.57438	59.3938	3.70099e-07	3.25289e-05
RFX_DNA_binding + zf_C2H2_ZHX	RFX_DNA_binding	zf_C2H2_ZHX	1	1951	279	28848	0.053015	0.00134044	0.298076	3.83396e-07	3.36222e-05
ESR1_C + Oest_recep	ESR1_C	Oest_recep	2	4	4	31069	4022.63	262.564	4503599627370490	4.6574e-07	4.07522e-05
Homeodomain + bZIP_1	Homeodomain	bZIP_1	19	8596	147	22317	0.335545	0.196297	0.543385	5.07773e-07	4.43312e-05
Elf-1_N + HNF_C	Elf-1_N	HNF_C	1	843	655	29580	0.0535797	0.00135673	0.300346	5.63795e-07	4.91128e-05
G-patch + MH1	G-patch	MH1	2	329	1881	28867	0.0932805	0.0112404	0.340201	5.81386e-07	5.05328e-05
DLL_N + HLH	DLL_N	HLH	3	335	2004	28737	0.12842	0.0263271	0.37912	5.92006e-07	5.13421e-05
PBC + RFX_DNA_binding	PBC	RFX_DNA_binding	1	277	1951	28850	0.0534015	0.00135015	0.300262	5.93521e-07	5.13599e-05
Homeodomain + LMSTEN	Homeodomain	LMSTEN	2	8613	61	22403	0.085284	0.0100947	0.321707	6.45935e-07	5.57723e-05
ATP-synt_G + Ets	ATP-synt_G	Ets	7	0	4065	27007	Inf	9.5696	Inf	6.59839e-07	5.68476e-05
Ets + Lectin_leg-like	Ets	Lectin_leg-like	8	4064	1	27006	53.1804	7.12259	2327.35	6.86584e-07	5.90222e-05
Myb_DNA-binding + RFX1_trans_act	Myb_DNA-binding	RFX1_trans_act	2	720	847	29510	0.0968063	0.0116661	0.351988	7.01925e-07	6.02088e-05
Forkhead_N + Forkhead_N	Forkhead_N	Forkhead_N	6	927	927	29219	0.204018	0.074474	0.447502	7.27401e-07	6.22579e-05
Myc-LZ + zf-C2H2	Myc-LZ	zf-C2H2	2	115	4996	25966	0.0903919	0.0108116	0.334213	7.49133e-07	6.38392e-05
Myc_N + zf-C2H2	Myc_N	zf-C2H2	2	115	4996	25966	0.0903919	0.0108116	0.334213	7.49133e-07	6.38392e-05
HLH + TF_AP-2	HLH	TF_AP-2	2	2005	301	28771	0.0953408	0.0114778	0.347914	7.73845e-07	6.5802e-05
Ets1_N_flank + zf-C2H2	Ets1_N_flank	zf-C2H2	1	100	4997	25981	0.0519951	0.00130736	0.296543	8.37184e-07	7.10338e-05
KOW + zf-C2H2	KOW	zf-C2H2	16	12	4982	26069	6.97617	3.09436	16.1596	8.43487e-07	7.1414e-05
G-patch + HLH	G-patch	HLH	3	328	2004	28744	0.131193	0.0268935	0.387398	8.50061e-07	7.18155e-05
Ets + PHD_2	Ets	PHD_2	10	4062	4	27003	16.6158	4.79022	72.6143	8.91754e-07	7.51758e-05
HMG_box + HSF_DNA-bind	HMG_box	HSF_DNA-bind	2	1253	478	29346	0.0980272	0.0118044	0.3567	9.48962e-07	7.94857e-05
CTF_NFI + DLL_N	CTF_NFI	DLL_N	1	1547	337	29194	0.0560123	0.00141675	0.314631	9.47273e-07	7.94857e-05
DLL_N + NfI_DNAbd_pre-N	DLL_N	NfI_DNAbd_pre-N	1	337	1547	29194	0.0560123	0.00141675	0.314631	9.47273e-07	7.94857e-05
E2F_CC-MB + SAM_PNT	E2F_CC-MB	SAM_PNT	1	355	1477	29246	0.0557907	0.00141134	0.313307	9.85068e-07	8.23341e-05
Homeodomain + Sox17_18_mid	Homeodomain	Sox17_18_mid	4	8611	72	22392	0.144469	0.0383162	0.386398	1.00394e-06	8.35661e-05
BTB + E2F_TDP	BTB	E2F_TDP	1	1392	376	29310	0.0560127	0.00141712	0.314472	1.00407e-06	8.35661e-05
BTB + Hormone_recep	BTB	Hormone_recep	3	1390	475	29211	0.132731	0.027243	0.391126	1.03265e-06	8.55813e-05
BTB + zf-C4	BTB	zf-C4	3	1390	475	29211	0.132731	0.027243	0.391126	1.03265e-06	8.55813e-05
Ank_2 + Ets	Ank_2	Ets	39	539	4033	26468	0.474874	0.333342	0.658997	1.04197e-06	8.61716e-05
Forkhead + Myb_DNA-binding	Forkhead	Myb_DNA-binding	22	2257	700	28100	0.391299	0.243078	0.598811	1.04704e-06	8.62399e-05
BTB + HSF_DNA-bind	BTB	HSF_DNA-bind	3	1390	477	29209	0.132165	0.0271269	0.389449	1.0472e-06	8.62399e-05
GATA + MACPF	GATA	MACPF	5	770	4	30300	49.1857	10.5581	250	1.1037e-06	9.07028e-05
Ets + zf_C2H2_ZHX	Ets	zf_C2H2_ZHX	12	4060	268	26739	0.294901	0.150324	0.524395	1.12096e-06	9.19283e-05
Ras + zf-C2H2	Ras	zf-C2H2	15	238	4983	25843	0.32687	0.179928	0.55076	1.16844e-06	9.56215e-05
Homeodomain + Pax7	Homeodomain	Pax7	9	8606	98	22366	0.23867	0.105955	0.472182	1.17347e-06	9.58333e-05
Ski_Sno + zf-C2H2	Ski_Sno	zf-C2H2	3	124	4995	25957	0.125728	0.0255561	0.376315	1.21117e-06	9.87064e-05
RFX_DNA_binding + SIX1_SD	RFX_DNA_binding	SIX1_SD	11	1941	559	28568	0.289631	0.143507	0.523484	1.21705e-06	9.89804e-05
Bromodomain + PPARgamma_N	Bromodomain	PPARgamma_N	8	608	33	30430	12.1289	4.82033	26.9341	1.22189e-06	9.91683e-05
Myosin_N + zf_ZIC	Myosin_N	zf_ZIC	3	40	13	31023	178.194	31.3771	673.319	1.3642e-06	0.000110489
Tropomyosin + zf_ZIC	Tropomyosin	zf_ZIC	3	41	13	31022	174.568	30.6716	657.236	1.46356e-06	0.000118292
CUTL + Elf-1_N	CUTL	Elf-1_N	2	699	842	29536	0.100395	0.0120894	0.365059	1.48836e-06	0.000119802
Elf-1_N + ULD	Elf-1_N	ULD	2	842	699	29536	0.100395	0.0120894	0.365059	1.48836e-06	0.000119802
Bromo_TP + Ets	Bromo_TP	Ets	16	18	4056	26989	5.9142	2.81897	12.2975	1.54552e-06	0.000123744
SH3_1 + zf-C2H2	SH3_1	zf-C2H2	5	143	4993	25938	0.181644	0.0580588	0.434194	1.54264e-06	0.000123744
HMG_box + SIX1_SD	HMG_box	SIX1_SD	4	1251	566	29258	0.165289	0.0448089	0.426644	1.54681e-06	0.000123744
HLH + zf-CCCH_4	HLH	zf-CCCH_4	2	2005	287	28785	0.100045	0.0120291	0.365191	1.58132e-06	0.000126062
BTB + JAB	BTB	JAB	1	1392	372	29314	0.0566228	0.00143247	0.317913	1.58221e-06	0.000126062
CUTL + Forkhead_N	CUTL	Forkhead_N	3	698	930	29448	0.136086	0.0279532	0.400652	1.6212e-06	0.000128646
Forkhead_N + ULD	Forkhead_N	ULD	3	930	698	29448	0.136086	0.0279532	0.400652	1.6212e-06	0.000128646
Elf-1_N + RFX1_trans_act	Elf-1_N	RFX1_trans_act	4	840	845	29390	0.165629	0.0449178	0.427265	1.63647e-06	0.000129595
zf-C2H2 + zf_C2H2_ZHX	zf-C2H2	zf_C2H2_ZHX	18	4980	262	25819	0.356196	0.207617	0.574822	1.64514e-06	0.000130019
Ets + Mt_ATP-synt_B	Ets	Mt_ATP-synt_B	9	4063	3	27004	19.9353	4.97244	114.836	1.70703e-06	0.000134639
BTB + LIM	BTB	LIM	6	1387	593	29093	0.212237	0.0774303	0.46595	1.87819e-06	0.000147841
Ets + JmjN	Ets	JmjN	13	4059	11	26996	7.85817	3.24641	19.3797	1.99493e-06	0.000156716
Ribosomal_L26 + zf-C2H2	Ribosomal_L26	zf-C2H2	10	3	4988	26078	17.4169	4.48469	98.6465	2.04709e-06	0.000160492
Ets + Peptidase_M28	Ets	Peptidase_M28	15	4057	16	26991	6.23652	2.86957	13.4764	2.11229e-06	0.000164943
BTB + E2F_CC-MB	BTB	E2F_CC-MB	1	1392	355	29331	0.0593689	0.00150153	0.333423	2.11036e-06	0.000164943
CTF_NFI + KRAB	CTF_NFI	KRAB	7	1541	562	28969	0.234155	0.0935238	0.486878	2.14963e-06	0.000167194
KRAB + NfI_DNAbd_pre-N	KRAB	NfI_DNAbd_pre-N	7	562	1541	28969	0.234155	0.0935238	0.486878	2.14963e-06	0.000167194
C2 + zf-C2H2	C2	zf-C2H2	9	180	4989	25901	0.259588	0.116713	0.504364	2.17599e-06	0.000168908
TEA + TEA	TEA	TEA	9	984	984	29102	0.270512	0.12294	0.5178	2.21016e-06	0.000170884
YBD + YBD	YBD	YBD	9	984	984	29102	0.270512	0.12294	0.5178	2.21016e-06	0.000170884
Hormone_recep + RFX_DNA_binding	Hormone_recep	RFX_DNA_binding	8	470	1944	28657	0.250921	0.10754	0.499545	2.29266e-06	0.000176566
RFX_DNA_binding + zf-C4	RFX_DNA_binding	zf-C4	8	1944	470	28657	0.250921	0.10754	0.499545	2.29266e-06	0.000176566
KRAB + zf-H2C2_2	KRAB	zf-H2C2_2	5	564	8	30502	33.7792	8.66681	117.542	2.30365e-06	0.000177065
Forkhead + HMG_box	Forkhead	HMG_box	52	2227	1203	27597	0.535657	0.396393	0.709836	2.40718e-06	0.000184661
Gelsolin + RFX_DNA_binding	Gelsolin	RFX_DNA_binding	22	93	1930	29034	3.55842	2.12316	5.72626	2.49946e-06	0.000191365
Band_7 + IRF-3	Band_7	IRF-3	6	121	88	30864	17.377	6.09315	40.4275	2.50832e-06	0.000191669
ATP_Ca_trans_C + Ets	ATP_Ca_trans_C	Ets	11	7	4061	27000	10.4457	3.69548	31.8296	2.52104e-06	0.000192266
HMG_box_2 + LIM	HMG_box_2	LIM	7	26	592	30454	13.8502	5.05339	32.8895	2.63712e-06	0.000200728
Ets + Sox_N	Ets	Sox_N	1	4071	114	26893	0.0579493	0.00145822	0.329635	2.66926e-06	0.000202781
HLH + HNF_C	HLH	HNF_C	16	1991	640	28432	0.357014	0.202402	0.585825	2.67624e-06	0.000202918
Cadherin_pro + HoxA13_N	Cadherin_pro	HoxA13_N	3	11	59	31006	143.142	24.9544	553.51	2.70901e-06	0.000205006
Hox9_act + RFX_DNA_binding	Hox9_act	RFX_DNA_binding	1	252	1951	28875	0.0587513	0.0014844	0.330631	2.72839e-06	0.000206075
PDZ + SIX1_SD	PDZ	SIX1_SD	17	225	553	30284	4.13727	2.35105	6.83468	2.80468e-06	0.00021143
DUF3528 + Forkhead	DUF3528	Forkhead	2	240	2277	28560	0.104527	0.0125805	0.382187	3.00871e-06	0.000226375
Ets + FAD_binding_6	Ets	FAD_binding_6	8	4064	2	27005	26.5655	5.30122	255.579	3.03444e-06	0.000227438
Ets + NAD_binding_1	Ets	NAD_binding_1	8	4064	2	27005	26.5655	5.30122	255.579	3.03444e-06	0.000227438
IRF-3 + zf-C2H2	IRF-3	zf-C2H2	1	93	4997	25988	0.0559237	0.00140477	0.319525	3.04333e-06	0.000227669
G-patch + SAM_PNT	G-patch	SAM_PNT	1	330	1477	29271	0.060069	0.0015189	0.337463	3.05298e-06	0.000227956
bZIP_2 + zf-C2H2	bZIP_2	zf-C2H2	7	157	4991	25924	0.231592	0.0915773	0.488929	3.34992e-06	0.000249652
DAGK_cat + Vasculin	DAGK_cat	Vasculin	4	8	286	30781	53.7357	11.7776	202.227	3.4653e-06	0.00025759
Forkhead + IRF	Forkhead	IRF	1	2278	209	28591	0.0600798	0.0015166	0.338644	3.46958e-06	0.00025759
Ribosomal_S7 + zf-C2H2	Ribosomal_S7	zf-C2H2	11	5	4987	26076	11.498	3.68208	42.2651	3.64062e-06	0.000269777
FOXP-CC + RFX_DNA_binding	FOXP-CC	RFX_DNA_binding	7	432	1945	28695	0.239063	0.0954019	0.497795	3.71464e-06	0.000274743
JAB + SAM_PNT	JAB	SAM_PNT	2	371	1476	29230	0.10674	0.0128774	0.389106	3.84229e-06	0.000283116
HLH + Vert_HS_TF	HLH	Vert_HS_TF	1	2006	238	28834	0.0604171	0.001526	0.340165	3.83991e-06	0.000283116
RFX_DNA_binding + TLE_N	RFX_DNA_binding	TLE_N	1	1951	244	28883	0.0606949	0.00153315	0.341664	3.87001e-06	0.000284624
Bromodomain + LIM	Bromodomain	LIM	30	586	569	29894	2.68936	1.78154	3.9238	4.19853e-06	0.000308207
CTF_NFI + HNF_C	CTF_NFI	HNF_C	10	1538	646	28885	0.290733	0.138472	0.539666	4.34446e-06	0.000317729
HNF_C + NfI_DNAbd_pre-N	HNF_C	NfI_DNAbd_pre-N	10	646	1538	28885	0.290733	0.138472	0.539666	4.34446e-06	0.000317729
Forkhead + Pou	Forkhead	Pou	15	2264	534	28266	0.350709	0.194532	0.585044	4.43454e-06	0.000323713
CEBP1_N + dsrm	CEBP1_N	dsrm	5	137	48	30889	23.4878	7.18172	59.9501	4.46253e-06	0.000323947
CEBP_ZZ + dsrm	CEBP_ZZ	dsrm	5	137	48	30889	23.4878	7.18172	59.9501	4.46253e-06	0.000323947
RRM_7 + dsrm	RRM_7	dsrm	5	137	48	30889	23.4878	7.18172	59.9501	4.46253e-06	0.000323947
Forkhead + GCM	Forkhead	GCM	2	2277	238	28562	0.105412	0.0126889	0.385461	4.49426e-06	0.000325647
DUF4074 + zf-C2H2	DUF4074	zf-C2H2	23	293	4975	25788	0.406904	0.253611	0.623321	4.58416e-06	0.000331548
GATA + TSP_1	GATA	TSP_1	6	769	13	30291	18.1746	5.64875	51.3468	4.84772e-06	0.000349965
CEBP1_N + HSP70	CEBP1_N	HSP70	5	137	49	30888	22.9768	7.04161	58.649	4.89989e-06	0.000351787
CEBP_ZZ + HSP70	CEBP_ZZ	HSP70	5	137	49	30888	22.9768	7.04161	58.649	4.89989e-06	0.000351787
HSP70 + RRM_7	HSP70	RRM_7	5	49	137	30888	22.9768	7.04161	58.649	4.89989e-06	0.000351787
E2F_TDP + RFX_DNA_binding	E2F_TDP	RFX_DNA_binding	5	372	1947	28755	0.198512	0.063999	0.468257	4.94765e-06	0.000354566
Ets + Tudor_2	Ets	Tudor_2	6	4066	0	27007	Inf	7.81618	Inf	5.04259e-06	0.000356156
ArgoL1 + CEBP1_N	ArgoL1	CEBP1_N	3	5	139	30932	133.673	20.4825	695.164	5.14245e-06	0.000356156
ArgoL1 + CEBP_ZZ	ArgoL1	CEBP_ZZ	3	5	139	30932	133.673	20.4825	695.164	5.14245e-06	0.000356156
ArgoL1 + RRM_7	ArgoL1	RRM_7	3	5	139	30932	133.673	20.4825	695.164	5.14245e-06	0.000356156
ArgoL2 + CEBP1_N	ArgoL2	CEBP1_N	3	5	139	30932	133.673	20.4825	695.164	5.14245e-06	0.000356156
ArgoL2 + CEBP_ZZ	ArgoL2	CEBP_ZZ	3	5	139	30932	133.673	20.4825	695.164	5.14245e-06	0.000356156
ArgoL2 + RRM_7	ArgoL2	RRM_7	3	5	139	30932	133.673	20.4825	695.164	5.14245e-06	0.000356156
ArgoMid + CEBP1_N	ArgoMid	CEBP1_N	3	5	139	30932	133.673	20.4825	695.164	5.14245e-06	0.000356156
ArgoMid + CEBP_ZZ	ArgoMid	CEBP_ZZ	3	5	139	30932	133.673	20.4825	695.164	5.14245e-06	0.000356156
ArgoMid + RRM_7	ArgoMid	RRM_7	3	5	139	30932	133.673	20.4825	695.164	5.14245e-06	0.000356156
ArgoN + CEBP1_N	ArgoN	CEBP1_N	3	5	139	30932	133.673	20.4825	695.164	5.14245e-06	0.000356156
ArgoN + CEBP_ZZ	ArgoN	CEBP_ZZ	3	5	139	30932	133.673	20.4825	695.164	5.14245e-06	0.000356156
ArgoN + RRM_7	ArgoN	RRM_7	3	5	139	30932	133.673	20.4825	695.164	5.14245e-06	0.000356156
CEBP1_N + Piwi	CEBP1_N	Piwi	3	139	5	30932	133.673	20.4825	695.164	5.14245e-06	0.000356156
CEBP_ZZ + Piwi	CEBP_ZZ	Piwi	3	139	5	30932	133.673	20.4825	695.164	5.14245e-06	0.000356156
Piwi + RRM_7	Piwi	RRM_7	3	5	139	30932	133.673	20.4825	695.164	5.14245e-06	0.000356156
Ets + SH2	Ets	SH2	2	4070	127	26880	0.10401	0.0124564	0.383806	5.0346e-06	0.000356156
HNF-1A_C + Pterin_4a	HNF-1A_C	Pterin_4a	2	27	2	31048	1165.84	79.3058	16384	5.0383e-06	0.000356156
Elf-1_N + PAX	Elf-1_N	PAX	1	843	564	29671	0.0624161	0.00157935	0.350093	5.13445e-06	0.000356156
Forkhead + Forkhead_N	Forkhead	Forkhead_N	35	2244	898	27902	0.484632	0.334519	0.681321	5.25939e-06	0.000363612
RFX1_trans_act + RFX_DNA_binding	RFX1_trans_act	RFX_DNA_binding	24	825	1928	28302	0.427047	0.271325	0.641945	5.30094e-06	0.00036584
G-patch + zf-C2H2	G-patch	zf-C2H2	25	306	4973	25775	0.423453	0.269462	0.638053	5.38178e-06	0.000370115
Elf-1_N + SIX1_SD	Elf-1_N	SIX1_SD	1	843	569	29666	0.0618572	0.00156528	0.346947	5.3743e-06	0.000370115
Sox_N + zf-C2H2	Sox_N	zf-C2H2	3	112	4995	25969	0.139263	0.0282917	0.417861	5.45572e-06	0.000373888
Spectrin + zf-C2H2	Spectrin	zf-C2H2	3	112	4995	25969	0.139263	0.0282917	0.417861	5.45572e-06	0.000373888
Ets + Tim44	Ets	Tim44	10	4062	6	27001	11.0766	3.64558	37.079	5.54659e-06	0.000379453
Band_7 + STAT_alpha	Band_7	STAT_alpha	6	121	104	30848	14.7036	5.17403	34.0143	6.25602e-06	0.000425757
Band_7 + STAT_bind	Band_7	STAT_bind	6	121	104	30848	14.7036	5.17403	34.0143	6.25602e-06	0.000425757
Band_7 + STAT_int	Band_7	STAT_int	6	121	104	30848	14.7036	5.17403	34.0143	6.25602e-06	0.000425757
PCI + zf-C2H2	PCI	zf-C2H2	18	20	4980	26061	4.70966	2.34694	9.38426	6.39027e-06	0.00043414
HMG_box + JAB	HMG_box	JAB	1	1254	372	29452	0.063149	0.00159695	0.354611	7.10215e-06	0.000481668
MH2 + RFX_DNA_binding	MH2	RFX_DNA_binding	4	334	1948	28793	0.177021	0.0479018	0.458265	7.47441e-06	0.00050604
Pou + RFX1_trans_act	Pou	RFX1_trans_act	1	548	848	29682	0.0638834	0.0016163	0.358353	7.55117e-06	0.000510355
DLL_N + Forkhead	DLL_N	Forkhead	6	332	2273	28468	0.226351	0.0823796	0.498741	7.59974e-06	0.000512754
CEBP1_N + PAZ	CEBP1_N	PAZ	3	139	6	30931	110.933	17.7862	532.349	7.68783e-06	0.000516032
CEBP_ZZ + PAZ	CEBP_ZZ	PAZ	3	139	6	30931	110.933	17.7862	532.349	7.68783e-06	0.000516032
PAZ + RRM_7	PAZ	RRM_7	3	6	139	30931	110.933	17.7862	532.349	7.68783e-06	0.000516032
KRAB + zf-C2H2_4	KRAB	zf-C2H2_4	6	563	21	30489	15.4707	5.08783	39.8216	7.82696e-06	0.000524473
FOXP-CC + HLH	FOXP-CC	HLH	8	431	1999	28641	0.265949	0.113918	0.529833	8.06932e-06	0.000539791
BTB + SET	BTB	SET	4	1389	471	29215	0.17863	0.0483997	0.461493	8.88498e-06	0.000593341
RFX_DNA_binding + SET	RFX_DNA_binding	SET	9	1943	466	28661	0.284896	0.129232	0.546731	8.99333e-06	0.000599555
Ets + Pax7	Ets	Pax7	1	4071	106	26901	0.0623414	0.00156738	0.355144	9.08146e-06	0.000604403
dsrm + zf-C2H2	dsrm	zf-C2H2	22	31	4976	26050	3.71504	2.04773	6.63293	9.14458e-06	0.000607572
IBN_N + zf-C2H2	IBN_N	zf-C2H2	10	179	4988	25902	0.290111	0.136678	0.546615	9.25489e-06	0.000613861
IRF-3 + Thioredoxin_6	IRF-3	Thioredoxin_6	3	91	11	30974	92.5268	16.3234	361.032	9.52015e-06	0.000630388
LIM + TEA	LIM	TEA	3	596	990	29490	0.149937	0.030779	0.441641	9.56649e-06	0.000631324
LIM + YBD	LIM	YBD	3	596	990	29490	0.149937	0.030779	0.441641	9.56649e-06	0.000631324
PAX + RAWUL	PAX	RAWUL	13	552	150	30364	4.76745	2.46474	8.46804	9.71861e-06	0.000639145
CUTL + RFX1_trans_act	CUTL	RFX1_trans_act	3	698	846	29532	0.150029	0.0308022	0.441826	9.73392e-06	0.000639145
RFX1_trans_act + ULD	RFX1_trans_act	ULD	3	846	698	29532	0.150029	0.0308022	0.441826	9.73392e-06	0.000639145
IRF-3 + IRF-3	IRF-3	IRF-3	5	89	89	30896	19.5029	6.03341	48.9133	1.00878e-05	0.000661271
BRI3BP + Ets1_N_flank	BRI3BP	Ets1_N_flank	2	0	99	30978	Inf	57.9611	Inf	1.04569e-05	0.000684322
CEBP1_N + R3H	CEBP1_N	R3H	3	139	7	30930	95.0916	15.7151	418.475	1.09458e-05	0.000712751
CEBP_ZZ + R3H	CEBP_ZZ	R3H	3	139	7	30930	95.0916	15.7151	418.475	1.09458e-05	0.000712751
R3H + RRM_7	R3H	RRM_7	3	7	139	30930	95.0916	15.7151	418.475	1.09458e-05	0.000712751
T-box + TEA	T-box	TEA	1	459	992	29627	0.065079	0.00164615	0.365196	1.10662e-05	0.000718201
T-box + YBD	T-box	YBD	1	459	992	29627	0.065079	0.00164615	0.365196	1.10662e-05	0.000718201
ATXN-1_C + PAX	ATXN-1_C	PAX	10	87	555	30427	6.30052	2.90282	12.2348	1.11112e-05	0.000718745
AXH + PAX	AXH	PAX	10	87	555	30427	6.30052	2.90282	12.2348	1.11112e-05	0.000718745
LIM + PHD	LIM	PHD	35	564	774	29706	2.3816	1.62998	3.38135	1.12068e-05	0.000723736
CTF_NFI + SWIRM	CTF_NFI	SWIRM	4	1544	410	29121	0.184012	0.0498345	0.475731	1.14784e-05	0.000738843
NfI_DNAbd_pre-N + SWIRM	NfI_DNAbd_pre-N	SWIRM	4	1544	410	29121	0.184012	0.0498345	0.475731	1.14784e-05	0.000738843
Forkhead + TF_AP-2	Forkhead	TF_AP-2	5	2274	298	28502	0.210305	0.0677153	0.497064	1.20083e-05	0.000771683
FOXP-CC + SAM_PNT	FOXP-CC	SAM_PNT	4	435	1474	29166	0.181954	0.0492875	0.470259	1.221e-05	0.000783359
Forkhead_N + Pou	Forkhead_N	Pou	2	931	547	29599	0.116277	0.0140502	0.423154	1.27979e-05	0.000819738
MH1 + USP8_dimer	MH1	USP8_dimer	9	1874	17	29179	8.24003	3.2326	19.5901	1.31314e-05	0.000839727
CUT + KRAB	CUT	KRAB	3	1020	566	29490	0.153243	0.0314524	0.451448	1.34912e-05	0.000861328
CUT + SIX1_SD	CUT	SIX1_SD	3	1020	567	29489	0.152968	0.0313962	0.450632	1.35894e-05	0.000866187
Myb_DNA-binding + Myb_DNA-binding	Myb_DNA-binding	Myb_DNA-binding	2	720	720	29637	0.114371	0.0138196	0.416097	1.36157e-05	0.000866451
Forkhead + zf_C2H2_ZHX	Forkhead	zf_C2H2_ZHX	4	2275	276	28524	0.181716	0.0491194	0.471241	1.39135e-05	0.000883972
Homeodomain + SSDP	Homeodomain	SSDP	42	8573	42	22422	2.61533	1.66276	4.11401	1.44381e-05	0.000915817
RFX_DNA_binding + TF_Otx	RFX_DNA_binding	TF_Otx	2	1950	258	28869	0.114768	0.0138406	0.4194	1.47959e-05	0.000936992
BTB + CUT	BTB	CUT	20	1373	1003	28683	0.416573	0.252502	0.649498	1.48326e-05	0.000937801
MH2 + PDZ	MH2	PDZ	12	326	230	30511	4.88235	2.46106	8.80989	1.54618e-05	0.000976013
Band_7 + SH2	Band_7	SH2	6	121	123	30829	12.423	4.38757	28.6038	1.55967e-05	0.000982945
MH1 + TF_AP-2	MH1	TF_AP-2	3	1880	300	28896	0.153707	0.0314874	0.454263	1.57307e-05	0.000989795
RhoGEF + zf-C2H2	RhoGEF	zf-C2H2	4	117	4994	25964	0.17775	0.0476164	0.467704	1.64298e-05	0.00103213
Homeodomain + RHD_dimer	Homeodomain	RHD_dimer	2	8613	51	22413	0.102052	0.0120105	0.38818	1.67655e-05	0.00104985
Homeodomain + RHD_DNA_bind	Homeodomain	RHD_DNA_bind	2	8613	51	22413	0.102052	0.0120105	0.38818	1.67655e-05	0.00104985
RFX_DNA_binding + SNF2-rel_dom	RFX_DNA_binding	SNF2-rel_dom	6	1946	378	28749	0.234504	0.0854058	0.516192	1.68322e-05	0.00105235
Fibrillin_U_N + zf-C2H2	Fibrillin_U_N	zf-C2H2	6	0	4992	26081	Inf	6.14891	Inf	1.72537e-05	0.00107527
TB + zf-C2H2	TB	zf-C2H2	6	0	4992	26081	Inf	6.14891	Inf	1.72537e-05	0.00107527
CEBP1_N + DZF	CEBP1_N	DZF	4	138	30	30907	29.8434	7.53689	86.2145	1.74129e-05	0.00107911
CEBP_ZZ + DZF	CEBP_ZZ	DZF	4	138	30	30907	29.8434	7.53689	86.2145	1.74129e-05	0.00107911
DZF + RRM_7	DZF	RRM_7	4	30	138	30907	29.8434	7.53689	86.2145	1.74129e-05	0.00107911
CTF_NFI + G-patch	CTF_NFI	G-patch	2	1546	329	29202	0.114815	0.0138615	0.418852	1.74529e-05	0.00107911
G-patch + NfI_DNAbd_pre-N	G-patch	NfI_DNAbd_pre-N	2	329	1546	29202	0.114815	0.0138615	0.418852	1.74529e-05	0.00107911
Atrophin-1 + TF_Otx	Atrophin-1	TF_Otx	6	59	254	30760	12.3114	4.30423	28.786	1.76795e-05	0.00108761
BTB + WH2	BTB	WH2	6	1387	8	29678	16.0503	4.58187	52.7734	1.76539e-05	0.00108761
FOXO_KIX_bdg + HLH	FOXO_KIX_bdg	HLH	1	214	2006	28858	0.0672506	0.00169726	0.379041	1.77054e-05	0.00108761
FOXO-TAD + HLH	FOXO-TAD	HLH	1	214	2006	28858	0.0672506	0.00169726	0.379041	1.77054e-05	0.00108761
RFX_DNA_binding + SOXp	RFX_DNA_binding	SOXp	1	1951	219	28908	0.0676837	0.00170835	0.381405	1.77291e-05	0.00108761
STAT_alpha + Tropomyosin	STAT_alpha	Tropomyosin	4	106	40	30929	29.1605	7.44578	82.7372	1.80799e-05	0.00110395
STAT_bind + Tropomyosin	STAT_bind	Tropomyosin	4	106	40	30929	29.1605	7.44578	82.7372	1.80799e-05	0.00110395
STAT_int + Tropomyosin	STAT_int	Tropomyosin	4	106	40	30929	29.1605	7.44578	82.7372	1.80799e-05	0.00110395
HLH + MH2	HLH	MH2	5	2002	333	28739	0.215548	0.0694481	0.508975	1.81764e-05	0.00110811
Forkhead + T-box	Forkhead	T-box	12	2267	448	28352	0.335	0.171547	0.592266	1.83696e-05	0.00111815
RFX_DNA_binding + RRM_1	RFX_DNA_binding	RRM_1	11	1941	498	28629	0.325802	0.161324	0.589412	1.86375e-05	0.00113033
Ets + Methyltransf_3	Ets	Methyltransf_3	7	4065	2	27005	23.2635	4.42386	228.574	1.8632e-05	0.00113033
IQ + zf_ZIC	IQ	zf_ZIC	4	318	12	30745	32.2096	7.52934	106.974	1.86562e-05	0.00113033
KRAB + TEA	KRAB	TEA	3	566	990	29520	0.158049	0.0324324	0.465635	1.88745e-05	0.00113828
KRAB + YBD	KRAB	YBD	3	566	990	29520	0.158049	0.0324324	0.465635	1.88745e-05	0.00113828
Elf-1_N + LIM	Elf-1_N	LIM	2	842	597	29638	0.117954	0.0141951	0.429212	1.88393e-05	0.00113828
MAP7 + zf-C2H2	MAP7	zf-C2H2	7	1	4991	26080	36.5938	4.69632	1633.57	1.90583e-05	0.0011476
FOXO_KIX_bdg + Forkhead	FOXO_KIX_bdg	Forkhead	2	213	2277	28587	0.117888	0.0141459	0.431633	1.91743e-05	0.00115105
FOXO-TAD + Forkhead	FOXO-TAD	Forkhead	2	213	2277	28587	0.117888	0.0141459	0.431633	1.91743e-05	0.00115105
Ets + Synaptobrevin	Ets	Synaptobrevin	14	4058	18	26989	5.1725	2.37895	11.0186	1.98287e-05	0.00118199
Mito_carr + P53_TAD	Mito_carr	P53_TAD	4	72	61	30942	28.1644	7.2451	78.7602	1.99611e-05	0.00118199
Mito_carr + TAD2	Mito_carr	TAD2	4	72	61	30942	28.1644	7.2451	78.7602	1.99611e-05	0.00118199
Ago_hook + CEBP1_N	Ago_hook	CEBP1_N	3	9	139	30928	74.0409	12.7588	300.402	1.99331e-05	0.00118199
Ago_hook + CEBP_ZZ	Ago_hook	CEBP_ZZ	3	9	139	30928	74.0409	12.7588	300.402	1.99331e-05	0.00118199
Ago_hook + RRM_7	Ago_hook	RRM_7	3	9	139	30928	74.0409	12.7588	300.402	1.99331e-05	0.00118199
CEBP1_N + TNRC6-PABC_bdg	CEBP1_N	TNRC6-PABC_bdg	3	139	9	30928	74.0409	12.7588	300.402	1.99331e-05	0.00118199
CEBP_ZZ + TNRC6-PABC_bdg	CEBP_ZZ	TNRC6-PABC_bdg	3	139	9	30928	74.0409	12.7588	300.402	1.99331e-05	0.00118199
RRM_7 + TNRC6-PABC_bdg	RRM_7	TNRC6-PABC_bdg	3	139	9	30928	74.0409	12.7588	300.402	1.99331e-05	0.00118199
Helicase_C + LIM	Helicase_C	LIM	36	819	563	29661	2.31568	1.59378	3.27203	2.01373e-05	0.00119062
ARID + Ets	ARID	Ets	62	698	4010	26309	0.582779	0.441072	0.75814	2.03078e-05	0.00119889
Homeodomain + Ras	Homeodomain	Ras	41	8574	212	22252	0.501927	0.349821	0.704664	2.06365e-05	0.00121646
CEBP1_N + DUF3697	CEBP1_N	DUF3697	2	140	0	30937	Inf	41.1045	Inf	2.07294e-05	0.00121646
CEBP_ZZ + DUF3697	CEBP_ZZ	DUF3697	2	140	0	30937	Inf	41.1045	Inf	2.07294e-05	0.00121646
DUF3697 + RRM_7	DUF3697	RRM_7	2	0	140	30937	Inf	41.1045	Inf	2.07294e-05	0.00121646
SAM_PNT + T-box	SAM_PNT	T-box	5	1473	455	29146	0.217443	0.070154	0.512371	2.08204e-05	0.00121997
HLH + zf_C2H2_ZHX	HLH	zf_C2H2_ZHX	3	2004	277	28795	0.155623	0.0318656	0.460224	2.2281e-05	0.0013036
CUT + CUT	CUT	CUT	12	1011	1011	29045	0.341004	0.175004	0.60101	2.29791e-05	0.00134244
HMG_box + hnRNP_Q_AcD	HMG_box	hnRNP_Q_AcD	7	1248	16	29808	10.4472	3.62799	26.8814	2.38875e-05	0.00139344
ARID + KRAB	ARID	KRAB	1	759	568	29751	0.0690209	0.00174581	0.387251	2.40636e-05	0.00140163
DLL_N + SAM_PNT	DLL_N	SAM_PNT	2	336	1476	29265	0.118009	0.0141915	0.430458	2.5339e-05	0.00147154
MH2 + SAM_PNT	MH2	SAM_PNT	2	336	1476	29265	0.118009	0.0141915	0.430458	2.5339e-05	0.00147154
CTF_NFI + USP8_dimer	CTF_NFI	USP8_dimer	8	1540	18	29513	8.517	3.19875	20.6223	2.5956e-05	0.00150292
NfI_DNAbd_pre-N + USP8_dimer	NfI_DNAbd_pre-N	USP8_dimer	8	1540	18	29513	8.517	3.19875	20.6223	2.5956e-05	0.00150292
Pax2_C + SKICH	Pax2_C	SKICH	2	157	0	30920	Inf	36.6175	Inf	2.60096e-05	0.0015038
Band_7 + IRF	Band_7	IRF	7	120	203	30749	8.8339	3.43408	19.0951	2.61949e-05	0.00151228
LIM + RFX_DNA_binding	LIM	RFX_DNA_binding	15	584	1937	28543	0.378493	0.210029	0.631126	2.63643e-05	0.00151983
HoxA13_N + Sec23_BS	HoxA13_N	Sec23_BS	3	59	26	30991	60.5155	11.4143	206.818	2.66199e-05	0.00152558
HoxA13_N + Sec23_helical	HoxA13_N	Sec23_helical	3	59	26	30991	60.5155	11.4143	206.818	2.66199e-05	0.00152558
HoxA13_N + Sec23_trunk	HoxA13_N	Sec23_trunk	3	59	26	30991	60.5155	11.4143	206.818	2.66199e-05	0.00152558
HoxA13_N + zf-Sec23_Sec24	HoxA13_N	zf-Sec23_Sec24	3	59	26	30991	60.5155	11.4143	206.818	2.66199e-05	0.00152558
E2F_CC-MB + MH1	E2F_CC-MB	MH1	5	351	1878	28845	0.218801	0.0705149	0.516441	2.66775e-05	0.00152665
Ank_2 + Helicase_C	Ank_2	Helicase_C	2	576	853	29648	0.120718	0.0145317	0.439325	2.71268e-05	0.0015501
Pkinase + TEA	Pkinase	TEA	32	413	961	29673	2.3923	1.60562	3.4538	2.77377e-05	0.00157823
Pkinase + YBD	Pkinase	YBD	32	413	961	29673	2.3923	1.60562	3.4538	2.77377e-05	0.00157823
Actin + STAT_alpha	Actin	STAT_alpha	5	94	105	30875	15.6343	4.86255	38.9333	2.78203e-05	0.00157823
Actin + STAT_bind	Actin	STAT_bind	5	94	105	30875	15.6343	4.86255	38.9333	2.78203e-05	0.00157823
Actin + STAT_int	Actin	STAT_int	5	94	105	30875	15.6343	4.86255	38.9333	2.78203e-05	0.00157823
BTB + CUTL	BTB	CUTL	11	1382	690	28996	0.33449	0.165776	0.604195	2.79332e-05	0.00158006
BTB + ULD	BTB	ULD	11	1382	690	28996	0.33449	0.165776	0.604195	2.79332e-05	0.00158006
PAX + zf-C3HC4_2	PAX	zf-C3HC4_2	13	552	167	30347	4.27879	2.21764	7.57984	2.79852e-05	0.00158072
DBINO + Ets	DBINO	Ets	13	16	4059	26991	5.40243	2.38864	11.9884	2.86002e-05	0.00161313
FOXP-CC + MH1	FOXP-CC	MH1	8	431	1875	28765	0.284765	0.121951	0.567398	2.89166e-05	0.00162864
AKAP95 + zf-C2H2	AKAP95	zf-C2H2	17	21	4981	26060	4.23511	2.09642	8.43518	2.94156e-05	0.00165112
CTF_NFI + Methyltransf_8	CTF_NFI	Methyltransf_8	4	1544	1	29530	76.3311	7.56093	3670.4	2.94422e-05	0.00165112
Methyltransf_8 + NfI_DNAbd_pre-N	Methyltransf_8	NfI_DNAbd_pre-N	4	1	1544	29530	76.3311	7.56093	3670.4	2.94422e-05	0.00165112
Homeodomain + zf-met	Homeodomain	zf-met	98	8517	147	22317	1.74679	1.33705	2.27377	2.98622e-05	0.00167228
GCM + HLH	GCM	HLH	2	238	2005	28834	0.120853	0.0145156	0.441989	3.00608e-05	0.001681
DUF3776 + GABP-alpha	DUF3776	GABP-alpha	2	0	170	30907	Inf	33.8693	Inf	3.04512e-05	0.00170041
DUF3528 + HLH	DUF3528	HLH	2	240	2005	28832	0.119837	0.0143927	0.438234	3.09447e-05	0.00172551
G_path_suppress + PAX	G_path_suppress	PAX	5	16	560	30498	17.0139	4.85713	48.8426	3.11936e-05	0.00173692
Ets + SpaA	Ets	SpaA	6	4066	1	27006	39.8197	4.83154	1813.79	3.13391e-05	0.00174254
HLH + T-box	HLH	T-box	10	1997	450	28622	0.318507	0.151465	0.592513	3.23312e-05	0.00179516
Band_7 + Ets	Band_7	Ets	34	93	4038	26914	2.43663	1.59227	3.65063	3.2384e-05	0.00179555
CEBP1_N + FDF	CEBP1_N	FDF	3	139	11	30926	60.6055	10.7388	231.944	3.27598e-05	0.00179606
CEBP1_N + LSM14	CEBP1_N	LSM14	3	139	11	30926	60.6055	10.7388	231.944	3.27598e-05	0.00179606
CEBP_ZZ + FDF	CEBP_ZZ	FDF	3	139	11	30926	60.6055	10.7388	231.944	3.27598e-05	0.00179606
CEBP_ZZ + LSM14	CEBP_ZZ	LSM14	3	139	11	30926	60.6055	10.7388	231.944	3.27598e-05	0.00179606
FDF + RRM_7	FDF	RRM_7	3	11	139	30926	60.6055	10.7388	231.944	3.27598e-05	0.00179606
LSM14 + RRM_7	LSM14	RRM_7	3	11	139	30926	60.6055	10.7388	231.944	3.27598e-05	0.00179606
TEA + Vg_Tdu	TEA	Vg_Tdu	3	990	0	30086	Inf	12.5324	Inf	3.25219e-05	0.00179606
Vg_Tdu + YBD	Vg_Tdu	YBD	3	0	990	30086	Inf	12.5324	Inf	3.25219e-05	0.00179606
Myb_DNA-binding + SIX1_SD	Myb_DNA-binding	SIX1_SD	1	721	569	29788	0.072621	0.00183652	0.407511	3.30637e-05	0.00181019
Mito_carr + P53	Mito_carr	P53	4	72	70	30933	24.5422	6.3365	68.3266	3.33639e-05	0.00182154
Mito_carr + P53_tetramer	Mito_carr	P53_tetramer	4	72	70	30933	24.5422	6.3365	68.3266	3.33639e-05	0.00182154
BASP1 + Ets	BASP1	Ets	11	11	4061	26996	6.64693	2.61144	16.9121	3.36941e-05	0.00182937
DUF3591 + Ets	DUF3591	Ets	11	11	4061	26996	6.64693	2.61144	16.9121	3.36941e-05	0.00182937
Ets + TBP-binding	Ets	TBP-binding	11	4061	11	26996	6.64693	2.61144	16.9121	3.36941e-05	0.00182937
Ets + zf-CCHC_6	Ets	zf-CCHC_6	11	4061	11	26996	6.64693	2.61144	16.9121	3.36941e-05	0.00182937
PAS_11 + TF_Otx	PAS_11	TF_Otx	7	100	253	30719	8.49743	3.29769	18.4147	3.38515e-05	0.00183284
SH2 + Tropomyosin	SH2	Tropomyosin	4	125	40	30910	24.7247	6.32697	69.8657	3.38111e-05	0.00183284
Ets + TLE_N	Ets	TLE_N	12	4060	233	26774	0.339643	0.172803	0.605419	3.53973e-05	0.0019139
E_Pc_C + zf-C2H2	E_Pc_C	zf-C2H2	16	19	4982	26062	4.40504	2.117	9.05139	3.62575e-05	0.00195233
EPL1 + zf-C2H2	EPL1	zf-C2H2	16	19	4982	26062	4.40504	2.117	9.05139	3.62575e-05	0.00195233
ING + zf-C2H2	ING	zf-C2H2	16	19	4982	26062	4.40504	2.117	9.05139	3.62575e-05	0.00195233
Elf-1_N + Elf-1_N	Elf-1_N	Elf-1_N	6	838	838	29397	0.251175	0.0916558	0.551365	3.69479e-05	0.00198678
FOXO_KIX_bdg + MHC_I	FOXO_KIX_bdg	MHC_I	3	212	7	30857	62.2772	10.3252	273.291	3.77985e-05	0.00202142
FOXO_KIX_bdg + MHC_I_C	FOXO_KIX_bdg	MHC_I_C	3	212	7	30857	62.2772	10.3252	273.291	3.77985e-05	0.00202142
FOXO-TAD + MHC_I	FOXO-TAD	MHC_I	3	212	7	30857	62.2772	10.3252	273.291	3.77985e-05	0.00202142
FOXO-TAD + MHC_I_C	FOXO-TAD	MHC_I_C	3	212	7	30857	62.2772	10.3252	273.291	3.77985e-05	0.00202142
Ets + Fer2_3	Ets	Fer2_3	5	4067	0	27007	Inf	6.08179	Inf	3.8528e-05	0.0020437
Ets + Fer4_17	Ets	Fer4_17	5	4067	0	27007	Inf	6.08179	Inf	3.8528e-05	0.0020437
Ets + Na_K-ATPase	Ets	Na_K-ATPase	5	4067	0	27007	Inf	6.08179	Inf	3.8528e-05	0.0020437
Ets + UPF0240	Ets	UPF0240	5	4067	0	27007	Inf	6.08179	Inf	3.8528e-05	0.0020437
Ets + Zip	Ets	Zip	5	4067	0	27007	Inf	6.08179	Inf	3.8528e-05	0.0020437
Elf-1_N + KRAB	Elf-1_N	KRAB	2	842	567	29668	0.12432	0.0149699	0.452496	3.84697e-05	0.0020437
KRAB + RFX1_trans_act	KRAB	RFX1_trans_act	2	567	847	29663	0.123566	0.0148781	0.449738	3.92048e-05	0.0020768
Elf-1_N + Tudor-knot	Elf-1_N	Tudor-knot	11	833	81	30154	4.91585	2.35153	9.31471	4.03446e-05	0.00213429
Homeodomain + P53	Homeodomain	P53	6	8609	68	22396	0.229539	0.081362	0.526229	4.15754e-05	0.00219348
Homeodomain + P53_tetramer	Homeodomain	P53_tetramer	6	8609	68	22396	0.229539	0.081362	0.526229	4.15754e-05	0.00219348
DUF4074 + MH1	DUF4074	MH1	4	312	1879	28884	0.197082	0.0532841	0.510583	4.19775e-05	0.00221172
MH1 + T-box	MH1	T-box	9	1874	451	28745	0.306104	0.138822	0.587618	4.35565e-05	0.00229183
GCM + RFX_DNA_binding	GCM	RFX_DNA_binding	2	238	1950	28889	0.124498	0.0149587	0.455308	4.37647e-05	0.0022997
Myosin_head + RFX_DNA_binding	Myosin_head	RFX_DNA_binding	51	395	1901	28732	1.95142	1.42287	2.62802	4.44937e-05	0.00232181
Ets + TPP_enzyme_C	Ets	TPP_enzyme_C	13	4059	17	26990	5.08453	2.26922	11.1256	4.44231e-05	0.00232181
Ets + TPP_enzyme_M	Ets	TPP_enzyme_M	13	4059	17	26990	5.08453	2.26922	11.1256	4.44231e-05	0.00232181
Ets + TPP_enzyme_N	Ets	TPP_enzyme_N	13	4059	17	26990	5.08453	2.26922	11.1256	4.44231e-05	0.00232181
HMG_box + dsrm	HMG_box	dsrm	10	1245	43	29781	5.56218	2.48635	11.2746	4.45036e-05	0.00232181
Myosin_head + STAT1_TAZ2bind	Myosin_head	STAT1_TAZ2bind	5	441	23	30610	15.0873	4.45873	40.8179	4.45408e-05	0.00232181
MH1 + zf_C2H2_ZHX	MH1	zf_C2H2_ZHX	3	1880	277	28919	0.166602	0.0340923	0.492786	4.46739e-05	0.00232565
Ets + IRF-3	Ets	IRF-3	1	4071	93	26914	0.0710901	0.00178442	0.406217	4.48933e-05	0.00233398
HLH + Hormone_recep	HLH	Hormone_recep	11	1996	467	28605	0.337572	0.167058	0.611031	4.55857e-05	0.00236371
HLH + zf-C4	HLH	zf-C4	11	1996	467	28605	0.337572	0.167058	0.611031	4.55857e-05	0.00236371
CTF_NFI + TF_AP-2	CTF_NFI	TF_AP-2	2	1546	301	29230	0.125624	0.0151118	0.458569	4.85386e-05	0.00250925
NfI_DNAbd_pre-N + TF_AP-2	NfI_DNAbd_pre-N	TF_AP-2	2	1546	301	29230	0.125624	0.0151118	0.458569	4.85386e-05	0.00250925
Elf-1_N + HSF_DNA-bind	Elf-1_N	HSF_DNA-bind	1	843	479	29756	0.0737027	0.00186356	0.413672	4.85848e-05	0.00250925
DUF4074 + SAM_PNT	DUF4074	SAM_PNT	2	314	1476	29287	0.126378	0.015206	0.461207	4.89268e-05	0.00252132
Helicase_C + SET	Helicase_C	SET	1	854	474	29750	0.0735061	0.00185859	0.412575	4.8947e-05	0.00252132
DZF + HMG_box	DZF	HMG_box	8	26	1247	29798	7.35014	2.87062	16.7633	4.91269e-05	0.00252726
MH1 + Myb_DNA-binding	MH1	Myb_DNA-binding	20	1863	702	28494	0.435754	0.263865	0.680271	5.11212e-05	0.00262297
Myosin_TH1 + zf_ZIC	Myosin_TH1	zf_ZIC	3	140	13	30923	50.8929	9.20272	186.957	5.11195e-05	0.00262297
EMP24_GP25L + LIM	EMP24_GP25L	LIM	5	17	594	30463	15.0825	4.33512	42.7574	5.24873e-05	0.00268955
E2F_TDP + HMG_box	E2F_TDP	HMG_box	2	375	1253	29449	0.125333	0.0150885	0.456943	5.35913e-05	0.00274253
FOXP-CC + Homeodomain	FOXP-CC	Homeodomain	85	354	8530	22110	0.622371	0.484617	0.791808	5.37644e-05	0.0027478
BTB + VPS9	BTB	VPS9	4	1389	2	29684	42.7217	6.1174	470.657	5.60577e-05	0.00286128
Meis_PKNOX_N + PBC	Meis_PKNOX_N	PBC	3	6	275	30795	55.8771	9.00526	264.395	5.71505e-05	0.00290524
Hormone_recep + TEA	Hormone_recep	TEA	2	476	991	29610	0.125518	0.0151194	0.457225	5.72896e-05	0.00290524
Hormone_recep + YBD	Hormone_recep	YBD	2	476	991	29610	0.125518	0.0151194	0.457225	5.72896e-05	0.00290524
TEA + zf-C4	TEA	zf-C4	2	991	476	29610	0.125518	0.0151194	0.457225	5.72896e-05	0.00290524
YBD + zf-C4	YBD	zf-C4	2	991	476	29610	0.125518	0.0151194	0.457225	5.72896e-05	0.00290524
Myosin_tail_1 + zf_ZIC	Myosin_tail_1	zf_ZIC	3	147	13	30916	48.403	8.76979	179.033	5.89289e-05	0.00298451
Actin + SH2	Actin	SH2	5	94	124	30856	13.2263	4.12782	32.7884	5.96483e-05	0.00301705
Ets + MRG	Ets	MRG	8	4064	5	27002	10.6286	3.06445	41.3197	6.00154e-05	0.0030317
EFhand_Ca_insen + STAT1_TAZ2bind	EFhand_Ca_insen	STAT1_TAZ2bind	2	11	26	31040	214.704	22.2004	1037.46	6.06781e-05	0.00306124
BTB + zf_C2H2_ZHX	BTB	zf_C2H2_ZHX	1	1392	279	29407	0.0757389	0.00191283	0.42612	6.25766e-05	0.00315296
POU2F1_C + SAM_PNT	POU2F1_C	SAM_PNT	1	266	1477	29335	0.0746867	0.00188603	0.420263	6.30876e-05	0.00317462
POU2F1_C + RFX_DNA_binding	POU2F1_C	RFX_DNA_binding	3	264	1949	28863	0.16829	0.0344237	0.497985	6.33118e-05	0.00318182
Actin + Ets	Actin	Ets	28	71	4044	26936	2.62679	1.63046	4.12666	6.34627e-05	0.00318532
MH1 + Methyltransf_8	MH1	Methyltransf_8	4	1879	1	29195	62.0082	6.14421	2998.34	6.39247e-05	0.00320441
MH1 + PBC	MH1	PBC	3	1880	275	28921	0.167825	0.0343375	0.496418	6.54863e-05	0.0032785
Ets + bZIP_1	Ets	bZIP_1	6	4066	160	26847	0.247612	0.0894722	0.551413	6.66967e-05	0.00332635
Band_7 + RHD_dimer	Band_7	RHD_dimer	4	123	49	30903	20.4973	5.29143	57.2341	6.66825e-05	0.00332635
Band_7 + RHD_DNA_bind	Band_7	RHD_DNA_bind	4	123	49	30903	20.4973	5.29143	57.2341	6.66825e-05	0.00332635
Homeodomain + T-box_assoc	Homeodomain	T-box_assoc	7	8608	72	22392	0.252899	0.0981425	0.548592	6.89483e-05	0.00343428
CTF_NFI + MH2	CTF_NFI	MH2	3	1545	335	29196	0.169232	0.0347125	0.499809	7.08554e-05	0.00352032
MH2 + NfI_DNAbd_pre-N	MH2	NfI_DNAbd_pre-N	3	335	1545	29196	0.169232	0.0347125	0.499809	7.08554e-05	0.00352032
Forkhead + RRM_1	Forkhead	RRM_1	16	2263	493	28307	0.405967	0.229795	0.667485	7.18027e-05	0.00356287
FOXO_KIX_bdg + Ras	FOXO_KIX_bdg	Ras	9	206	244	30620	5.48187	2.44252	10.7851	7.26088e-05	0.00358021
FOXO-TAD + Ras	FOXO-TAD	Ras	9	206	244	30620	5.48187	2.44252	10.7851	7.26088e-05	0.00358021
CEBP1_N + La	CEBP1_N	La	3	139	15	30922	44.455	8.15577	159.719	7.24614e-05	0.00358021
CEBP_ZZ + La	CEBP_ZZ	La	3	139	15	30922	44.455	8.15577	159.719	7.24614e-05	0.00358021
La + RRM_7	La	RRM_7	3	15	139	30922	44.455	8.15577	159.719	7.24614e-05	0.00358021
Nsp1_C + STAT_alpha	Nsp1_C	STAT_alpha	2	2	108	30967	284.803	20.5303	4301.57	7.41372e-05	0.00364183
Nsp1_C + STAT_bind	Nsp1_C	STAT_bind	2	2	108	30967	284.803	20.5303	4301.57	7.41372e-05	0.00364183
Nsp1_C + STAT_int	Nsp1_C	STAT_int	2	2	108	30967	284.803	20.5303	4301.57	7.41372e-05	0.00364183
YTH + zf-C2H2	YTH	zf-C2H2	11	9	4987	26072	6.3892	2.40553	17.4494	7.4482e-05	0.00365418
MH1 + PAX	MH1	PAX	14	1869	551	28645	0.389426	0.211037	0.660765	8.16724e-05	0.00399833
HoxA13_N + Peptidase_C1_2	HoxA13_N	Peptidase_C1_2	2	60	5	31012	206.225	19.2485	1266.43	8.17005e-05	0.00399833
Forkhead + PAX	Forkhead	PAX	19	2260	546	28254	0.435052	0.259406	0.687724	8.32698e-05	0.00406498
BAH + TF_Otx	BAH	TF_Otx	8	158	252	30661	6.15949	2.58563	12.6211	8.32462e-05	0.00406498
Gelsolin + HoxA13_N	Gelsolin	HoxA13_N	4	111	58	30906	19.1961	4.97539	53.191	8.40889e-05	0.00409986
PLDc_2 + Vasculin	PLDc_2	Vasculin	2	0	288	30789	Inf	19.9887	Inf	8.67712e-05	0.00422014
PLDc + Vasculin	PLDc	Vasculin	2	0	288	30789	Inf	19.9887	Inf	8.67712e-05	0.00422014
LIM + SAM_PNT	LIM	SAM_PNT	10	589	1468	29012	0.335541	0.159712	0.623312	8.84702e-05	0.00429744
IRF-3 + Pr_beta_C	IRF-3	Pr_beta_C	2	92	3	30982	223.412	18.4694	2044.76	8.99741e-05	0.00436508
KH_1 + zf-C2H2	KH_1	zf-C2H2	29	58	4969	26023	2.61841	1.61456	4.16143	9.32585e-05	0.00451325
PAP_assoc + zf-CCCH_4	PAP_assoc	zf-CCCH_4	4	22	285	30768	19.6179	4.88431	58.296	9.31635e-05	0.00451325
Forkhead + LIM	Forkhead	LIM	21	2258	578	28222	0.454112	0.278354	0.702617	9.6399e-05	0.00465948
Actin + STAT1_TAZ2bind	Actin	STAT1_TAZ2bind	3	96	25	30955	38.6538	7.34778	129.993	9.69332e-05	0.00467953
Bromodomain + Sox_N	Bromodomain	Sox_N	10	606	105	30358	4.77102	2.2116	9.1849	0.000100517	0.00483067
CEBP1_N + YTH	CEBP1_N	YTH	3	139	17	30920	39.2535	7.28094	137.939	0.000100557	0.00483067
CEBP_ZZ + YTH	CEBP_ZZ	YTH	3	139	17	30920	39.2535	7.28094	137.939	0.000100557	0.00483067
RRM_7 + YTH	RRM_7	YTH	3	139	17	30920	39.2535	7.28094	137.939	0.000100557	0.00483067
Homeodomain + TLE_N	Homeodomain	TLE_N	96	8519	149	22315	1.68766	1.29034	2.19857	0.000100866	0.00483958
zf-C2H2 + zf-C2H2_4	zf-C2H2	zf-C2H2_4	13	4985	14	26067	4.85539	2.09992	11.1445	0.000101021	0.00484109
BP28CT + Ets	BP28CT	Ets	9	8	4063	26999	7.47477	2.55819	22.2773	0.000101321	0.00484363
Ets + U3snoRNP10	Ets	U3snoRNP10	9	4063	8	26999	7.47477	2.55819	22.2773	0.000101321	0.00484363
Nsp1_C + SH2	Nsp1_C	SH2	2	2	127	30948	242.614	17.4732	3551.64	0.000102014	0.00487085
Ank_2 + HMG_box	Ank_2	HMG_box	7	571	1248	29253	0.287361	0.114766	0.597744	0.000103085	0.00490998
DUF4074 + Lyase_1	DUF4074	Lyase_1	2	314	0	30763	Inf	18.316	Inf	0.000103057	0.00490998
SAM_PNT + TF_AP-2	SAM_PNT	TF_AP-2	2	1476	301	29300	0.131898	0.0158728	0.481512	0.000103704	0.00493347
Histone + Homeodomain	Histone	Homeodomain	10	83	8605	22381	0.313351	0.14489	0.605973	0.000104069	0.00494486
IRF + Thioredoxin_6	IRF	Thioredoxin_6	3	207	11	30858	40.6152	7.22278	155.374	0.000104781	0.00497265
Ribosomal_L27A + zf-C2H2	Ribosomal_L27A	zf-C2H2	5	0	4993	26081	Inf	4.78427	Inf	0.000107378	0.00507748
SAM_PNT + SWIRM	SAM_PNT	SWIRM	5	1473	409	29192	0.242281	0.0781193	0.57136	0.000107143	0.00507748
LANC_like + SAM_PNT	LANC_like	SAM_PNT	3	0	1475	29601	Inf	8.28136	Inf	0.000107345	0.00507748
E2F_CC-MB + HMG_box	E2F_CC-MB	HMG_box	2	354	1253	29470	0.132867	0.0159998	0.484613	0.000107646	0.00508403
GATA-N + Tropomyosin	GATA-N	Tropomyosin	3	62	41	30973	36.5165	7.05023	119.246	0.00010876	0.00511199
OAR + Transglut_C	OAR	Transglut_C	2	186	1	30890	329.728	17.1619	16381.8	0.000108759	0.00511199
OAR + Transglut_core	OAR	Transglut_core	2	186	1	30890	329.728	17.1619	16381.8	0.000108759	0.00511199
OAR + Transglut_N	OAR	Transglut_N	2	186	1	30890	329.728	17.1619	16381.8	0.000108759	0.00511199
Ets + YL1_C	Ets	YL1_C	16	4056	29	26978	3.66917	1.85979	6.99177	0.000109259	0.00512929
LIM + RFX1_trans_act	LIM	RFX1_trans_act	3	596	846	29634	0.176321	0.0362107	0.519593	0.000110757	0.00519338
GATA + KRAB	GATA	KRAB	2	773	567	29737	0.13567	0.0163539	0.494127	0.000111918	0.00524154
GATA + SIX1_SD	GATA	SIX1_SD	2	773	568	29736	0.135427	0.0163245	0.493285	0.000112136	0.00524552
Forkhead + bZIP_2	Forkhead	bZIP_2	1	2278	163	28637	0.0771044	0.0019439	0.436285	0.000113452	0.00530074
14-3-3 + Forkhead	14-3-3	Forkhead	7	10	2272	28790	8.86918	2.86233	25.8356	0.00011387	0.00531395
Bromodomain + Myc-LZ	Bromodomain	Myc-LZ	10	606	107	30356	4.68125	2.17137	9.0048	0.000116116	0.00540587
Bromodomain + Myc_N	Bromodomain	Myc_N	10	606	107	30356	4.68125	2.17137	9.0048	0.000116116	0.00540587
PDZ_6 + zf-C2H2	PDZ_6	zf-C2H2	1	69	4997	26012	0.075445	0.00188669	0.434742	0.000116897	0.00543579
THRAP3_BCLAF1 + zf-C2H2	THRAP3_BCLAF1	zf-C2H2	8	4	4990	26077	10.4488	2.79847	47.4509	0.000119267	0.00553943
Biotin_carb_C + GATA-N	Biotin_carb_C	GATA-N	2	6	63	31008	163.299	15.8436	938.687	0.000119621	0.00554274
Biotin_carb_N + GATA-N	Biotin_carb_N	GATA-N	2	6	63	31008	163.299	15.8436	938.687	0.000119621	0.00554274
ARID + Sox_N	ARID	Sox_N	11	749	104	30215	4.26595	2.05718	7.9959	0.000123467	0.00562219
TPR_1 + zf-C2H2	TPR_1	zf-C2H2	10	158	4988	25923	0.328935	0.154618	0.621633	0.000123333	0.00562219
CTF_NFI + zf-RING_2	CTF_NFI	zf-RING_2	3	1545	0	29531	Inf	7.88824	Inf	0.000123342	0.00562219
NfI_DNAbd_pre-N + zf-RING_2	NfI_DNAbd_pre-N	zf-RING_2	3	1545	0	29531	Inf	7.88824	Inf	0.000123342	0.00562219
CEBP1_N + GYF	CEBP1_N	GYF	2	140	2	30935	219.448	15.8566	3174.28	0.000123631	0.00562219
CEBP1_N + PUF	CEBP1_N	PUF	2	140	2	30935	219.448	15.8566	3174.28	0.000123631	0.00562219
CEBP_ZZ + GYF	CEBP_ZZ	GYF	2	140	2	30935	219.448	15.8566	3174.28	0.000123631	0.00562219
CEBP_ZZ + PUF	CEBP_ZZ	PUF	2	140	2	30935	219.448	15.8566	3174.28	0.000123631	0.00562219
GYF + RRM_7	GYF	RRM_7	2	2	140	30935	219.448	15.8566	3174.28	0.000123631	0.00562219
Ldh_1_C + STAT_alpha	Ldh_1_C	STAT_alpha	2	3	108	30966	189.871	15.7594	1575.35	0.000123276	0.00562219
Ldh_1_C + STAT_bind	Ldh_1_C	STAT_bind	2	3	108	30966	189.871	15.7594	1575.35	0.000123276	0.00562219
Ldh_1_C + STAT_int	Ldh_1_C	STAT_int	2	3	108	30966	189.871	15.7594	1575.35	0.000123276	0.00562219
Ldh_1_N + STAT_alpha	Ldh_1_N	STAT_alpha	2	3	108	30966	189.871	15.7594	1575.35	0.000123276	0.00562219
Ldh_1_N + STAT_bind	Ldh_1_N	STAT_bind	2	3	108	30966	189.871	15.7594	1575.35	0.000123276	0.00562219
Ldh_1_N + STAT_int	Ldh_1_N	STAT_int	2	3	108	30966	189.871	15.7594	1575.35	0.000123276	0.00562219
PUF + RRM_7	PUF	RRM_7	2	2	140	30935	219.448	15.8566	3174.28	0.000123631	0.00562219
E2F_TDP + MH1	E2F_TDP	MH1	7	370	1876	28826	0.290709	0.1159	0.606222	0.000124478	0.00565416
Basic + Bromodomain	Basic	Bromodomain	9	87	607	30376	5.17596	2.27955	10.3519	0.000124857	0.00565827
Bromodomain + Myf5	Bromodomain	Myf5	9	607	87	30376	5.17596	2.27955	10.3519	0.000124857	0.00565827
SSDP + zf-C2H2	SSDP	zf-C2H2	2	82	4996	25999	0.12693	0.0150938	0.473642	0.00013341	0.00603887
Ets + HAUS5	Ets	HAUS5	7	4065	4	27003	11.6233	2.95336	54.1862	0.000134107	0.00605646
Ets + Mt_ATP-synt_D	Ets	Mt_ATP-synt_D	7	4065	4	27003	11.6233	2.95336	54.1862	0.000134107	0.00605646
CTF_NFI + DUF4074	CTF_NFI	DUF4074	3	1545	313	29218	0.181264	0.0371587	0.53566	0.000136753	0.00616174
DUF4074 + NfI_DNAbd_pre-N	DUF4074	NfI_DNAbd_pre-N	3	313	1545	29218	0.181264	0.0371587	0.53566	0.000136753	0.00616174
Band_7 + ETS_PEA3_N	Band_7	ETS_PEA3_N	5	122	115	30837	10.9863	3.44039	27.0859	0.000137804	0.00620197
Ribosomal_S18 + zf-C2H2	Ribosomal_S18	zf-C2H2	9	6	4989	26075	7.83768	2.49054	26.7798	0.000140903	0.00633418
CUT + Pou	CUT	Pou	4	1019	545	29511	0.212562	0.0575779	0.549085	0.000141092	0.00633541
CTF_NFI + PBC	CTF_NFI	PBC	2	1546	276	29255	0.137127	0.0164995	0.500938	0.000141519	0.00634007
NfI_DNAbd_pre-N + PBC	NfI_DNAbd_pre-N	PBC	2	1546	276	29255	0.137127	0.0164995	0.500938	0.000141519	0.00634007
Forkhead + RFX5_DNA_bdg	Forkhead	RFX5_DNA_bdg	6	2273	280	28520	0.268877	0.0977249	0.593602	0.000142488	0.00636891
Forkhead + RFX5_N	Forkhead	RFX5_N	6	2273	280	28520	0.268877	0.0977249	0.593602	0.000142488	0.00636891
SAM_PNT + Vasculin	SAM_PNT	Vasculin	2	1476	288	29313	0.137917	0.016598	0.503671	0.000143067	0.00638752
Arm_2 + JAB	Arm_2	JAB	2	0	371	30706	Inf	15.4793	Inf	0.000143659	0.00640662
BRK + LIM	BRK	LIM	11	137	588	30343	4.14298	2.00968	7.70184	0.000147252	0.00647059
STAT_alpha + Sec23_BS	STAT_alpha	Sec23_BS	3	107	26	30943	33.3374	6.36314	111.238	0.000147404	0.00647059
STAT_alpha + Sec23_helical	STAT_alpha	Sec23_helical	3	107	26	30943	33.3374	6.36314	111.238	0.000147404	0.00647059
STAT_alpha + Sec23_trunk	STAT_alpha	Sec23_trunk	3	107	26	30943	33.3374	6.36314	111.238	0.000147404	0.00647059
STAT_alpha + zf-Sec23_Sec24	STAT_alpha	zf-Sec23_Sec24	3	107	26	30943	33.3374	6.36314	111.238	0.000147404	0.00647059
STAT_bind + Sec23_BS	STAT_bind	Sec23_BS	3	107	26	30943	33.3374	6.36314	111.238	0.000147404	0.00647059
STAT_bind + Sec23_helical	STAT_bind	Sec23_helical	3	107	26	30943	33.3374	6.36314	111.238	0.000147404	0.00647059
STAT_bind + Sec23_trunk	STAT_bind	Sec23_trunk	3	107	26	30943	33.3374	6.36314	111.238	0.000147404	0.00647059
STAT_bind + zf-Sec23_Sec24	STAT_bind	zf-Sec23_Sec24	3	107	26	30943	33.3374	6.36314	111.238	0.000147404	0.00647059
STAT_int + Sec23_BS	STAT_int	Sec23_BS	3	107	26	30943	33.3374	6.36314	111.238	0.000147404	0.00647059
STAT_int + Sec23_helical	STAT_int	Sec23_helical	3	107	26	30943	33.3374	6.36314	111.238	0.000147404	0.00647059
STAT_int + Sec23_trunk	STAT_int	Sec23_trunk	3	107	26	30943	33.3374	6.36314	111.238	0.000147404	0.00647059
STAT_int + zf-Sec23_Sec24	STAT_int	zf-Sec23_Sec24	3	107	26	30943	33.3374	6.36314	111.238	0.000147404	0.00647059
Det1 + ETS_PEA3_N	Det1	ETS_PEA3_N	2	3	118	30956	174.875	14.4335	1569.46	0.000146726	0.00647059
Myb_DNA-binding + RRM_1	Myb_DNA-binding	RRM_1	1	721	508	29849	0.0815078	0.0020603	0.4576	0.00014821	0.00649871
BCL9 + LIM	BCL9	LIM	9	92	590	30388	5.03785	2.22221	10.0499	0.000149649	0.00655447
HNF-1B_C + HNF-1_N	HNF-1B_C	HNF-1_N	6	147	155	30771	8.10201	2.8816	18.4589	0.000151674	0.00663576
Myosin_head + bZIP_1	Myosin_head	bZIP_1	10	436	156	30477	4.48046	2.09226	8.53954	0.000152288	0.00665519
E2F_TDP + TEA	E2F_TDP	TEA	1	376	992	29710	0.079668	0.00201322	0.447547	0.000153922	0.00670416
E2F_TDP + YBD	E2F_TDP	YBD	1	376	992	29710	0.079668	0.00201322	0.447547	0.000153922	0.00670416
GATA + HSF_DNA-bind	GATA	HSF_DNA-bind	1	774	479	29825	0.0804589	0.00203379	0.451719	0.000153655	0.00670416
G-patch + PAP_assoc	G-patch	PAP_assoc	4	327	22	30726	17.077	4.25471	50.7444	0.000156956	0.00682871
PHD + TEA	PHD	TEA	9	800	984	29286	0.334832	0.152093	0.64149	0.00015924	0.00691275
PHD + YBD	PHD	YBD	9	800	984	29286	0.334832	0.152093	0.64149	0.00015924	0.00691275
PAS + TF_Otx	PAS	TF_Otx	7	130	253	30689	6.5304	2.54881	14.0392	0.000161495	0.00700287
FOXP-CC + TEA	FOXP-CC	TEA	2	437	991	29649	0.136906	0.0164977	0.498947	0.000162812	0.0070444
FOXP-CC + YBD	FOXP-CC	YBD	2	437	991	29649	0.136906	0.0164977	0.498947	0.000162812	0.0070444
CTF_NFI + Myb_DNA-bind_4	CTF_NFI	Myb_DNA-bind_4	6	1542	12	29519	9.5702	2.94288	27.601	0.000167162	0.00721669
Myb_DNA-bind_4 + NfI_DNAbd_pre-N	Myb_DNA-bind_4	NfI_DNAbd_pre-N	6	12	1542	29519	9.5702	2.94288	27.601	0.000167162	0.00721669
ATXN-1_C + TF_Otx	ATXN-1_C	TF_Otx	6	91	254	30728	7.97485	2.82585	18.2765	0.000169255	0.00728815
AXH + TF_Otx	AXH	TF_Otx	6	91	254	30728	7.97485	2.82585	18.2765	0.000169255	0.00728815
Ldh_1_C + SH2	Ldh_1_C	SH2	2	3	127	30947	161.959	13.4194	1427.39	0.000169561	0.00728815
Ldh_1_N + SH2	Ldh_1_N	SH2	2	3	127	30947	161.959	13.4194	1427.39	0.000169561	0.00728815
Glycogen_syn + HoxA13_N	Glycogen_syn	HoxA13_N	2	8	60	31009	128.808	13.0621	672.258	0.000174398	0.00748784
GATA + Ldl_recept_a	GATA	Ldl_recept_a	6	769	28	30276	8.43514	2.84732	20.8414	0.000174712	0.0074931
SH3_9 + zf-C2H2	SH3_9	zf-C2H2	1	66	4997	26015	0.0788834	0.00197122	0.455279	0.000175143	0.00750339
Arm_2 + SWIRM	Arm_2	SWIRM	2	0	412	30665	Inf	13.9299	Inf	0.000177023	0.00757567
PHD + TF_Otx	PHD	TF_Otx	18	791	242	30028	2.82345	1.63673	4.58723	0.000177824	0.00760163
BCL_N + T-box	BCL_N	T-box	8	98	452	30521	5.51207	2.30072	11.3853	0.000184323	0.00787085
HLH + IRF	HLH	IRF	2	2005	208	28864	0.138427	0.016633	0.507055	0.000186037	0.00793543
GCM + SAM_PNT	GCM	SAM_PNT	1	239	1477	29362	0.0832019	0.00209966	0.46865	0.000189065	0.0080558
MH1 + TF_Otx	MH1	TF_Otx	3	1880	257	28939	0.179691	0.0368025	0.531876	0.000192438	0.00819062
CTF_NFI + HMG_box	CTF_NFI	HMG_box	36	1512	1219	28312	0.553023	0.383926	0.773547	0.000200199	0.00850248
HMG_box + NfI_DNAbd_pre-N	HMG_box	NfI_DNAbd_pre-N	36	1219	1512	28312	0.553023	0.383926	0.773547	0.000200199	0.00850248
HSP70 + bZIP_1	HSP70	bZIP_1	4	50	162	30863	15.2356	3.94967	42.2311	0.000201583	0.00855202
Ras + TEA	Ras	TEA	20	233	973	29853	2.63346	1.57211	4.18464	0.00020217	0.00855837
Ras + YBD	Ras	YBD	20	233	973	29853	2.63346	1.57211	4.18464	0.00020217	0.00855837
CEBP1_N + DCP1	CEBP1_N	DCP1	2	140	3	30934	147.02	12.1835	1301	0.000205433	0.00864052
CEBP1_N + mRNA_decap_C	CEBP1_N	mRNA_decap_C	2	140	3	30934	147.02	12.1835	1301	0.000205433	0.00864052
CEBP_ZZ + DCP1	CEBP_ZZ	DCP1	2	140	3	30934	147.02	12.1835	1301	0.000205433	0.00864052
CEBP_ZZ + mRNA_decap_C	CEBP_ZZ	mRNA_decap_C	2	140	3	30934	147.02	12.1835	1301	0.000205433	0.00864052
DCP1 + RRM_7	DCP1	RRM_7	2	3	140	30934	147.02	12.1835	1301	0.000205433	0.00864052
RRM_7 + mRNA_decap_C	RRM_7	mRNA_decap_C	2	140	3	30934	147.02	12.1835	1301	0.000205433	0.00864052
BCL_N + LIM	BCL_N	LIM	9	97	590	30383	4.77812	2.11064	9.51213	0.000216191	0.00908327
Ets1_N_flank + Utp12	Ets1_N_flank	Utp12	2	99	5	30973	124.475	11.7519	789.237	0.000217273	0.00911896
Ets + TFIID-31kDa	Ets	TFIID-31kDa	12	4060	18	26989	4.43165	1.94546	9.73178	0.000219735	0.00921243
MH1 + zf-RING_2	MH1	zf-RING_2	3	1880	0	29196	Inf	6.41048	Inf	0.000222075	0.00930057
HNF-1_N + zf-C2H2	HNF-1_N	zf-C2H2	10	151	4988	25930	0.344277	0.161684	0.651433	0.000224436	0.00938943
HNF_C + Pou	HNF_C	Pou	1	655	548	29875	0.083244	0.00210411	0.467329	0.000224825	0.00939567
Homeodomain + ING	Homeodomain	ING	1	8614	34	22430	0.0765882	0.00188812	0.456703	0.000230322	0.00961514
CUT + SWIRM	CUT	SWIRM	2	1021	412	29644	0.140926	0.0169817	0.513712	0.000230572	0.00961535
ETS_PEA3_N + GrpE	ETS_PEA3_N	GrpE	3	117	28	30931	28.3116	5.43237	93.7002	0.000233169	0.00971332
DnaJ_CXXCXGXG + P53_TAD	DnaJ_CXXCXGXG	P53_TAD	2	9	63	31005	108.998	11.2515	549.925	0.00023402	0.00972808
DnaJ_CXXCXGXG + TAD2	DnaJ_CXXCXGXG	TAD2	2	9	63	31005	108.998	11.2515	549.925	0.00023402	0.00972808
SH2 + Sec23_BS	SH2	Sec23_BS	3	126	26	30924	28.3058	5.41328	94.2623	0.000235885	0.00976419
SH2 + Sec23_helical	SH2	Sec23_helical	3	126	26	30924	28.3058	5.41328	94.2623	0.000235885	0.00976419
SH2 + Sec23_trunk	SH2	Sec23_trunk	3	126	26	30924	28.3058	5.41328	94.2623	0.000235885	0.00976419
SH2 + zf-Sec23_Sec24	SH2	zf-Sec23_Sec24	3	126	26	30924	28.3058	5.41328	94.2623	0.000235885	0.00976419
Homeodomain + Proteasome	Homeodomain	Proteasome	4	8611	51	22413	0.204144	0.053541	0.555683	0.000236216	0.00976759
HSF_DNA-bind + SGT1	HSF_DNA-bind	SGT1	2	478	0	30599	Inf	11.9868	Inf	0.000238044	0.00983278
Homeobox_KN + PBC	Homeobox_KN	PBC	3	11	275	30790	30.521	5.43643	116.397	0.000239569	0.00988539
GATA + Pou	GATA	Pou	2	773	547	29757	0.140728	0.0169651	0.512635	0.000242414	0.00999226

## Sheet: FDR < 0.01 Pair details
TF1_TF2	P1_P2	Domain1	Domain2
DUXB_DUXB	A0A1W2PPF3_A0A1W2PPF3	Homeodomain	Homeodomain
CPHXL2_CPHXL2	A0A1W2PPK0_A0A1W2PPK0	Homeodomain	Homeodomain
CPHXL_CPHXL2	A0A1W2PPM1_A0A1W2PPK0	Homeodomain	Homeodomain
CPHXL_CPHXL	A0A1W2PPM1_A0A1W2PPM1	Homeodomain	Homeodomain
DPRX_DPRX	A6NFQ7_A6NFQ7	Homeodomain	Homeodomain
DUXA_DUXA	A6NLW8_A6NLW8	Homeodomain	Homeodomain
LEUTX_LEUTX	A8MZ59_A8MZ59	Homeodomain	Homeodomain
CRX_CRX	O43186_O43186	Homeodomain	Homeodomain
HOXA2_HOXA2	O43364_O43364	Homeodomain	Homeodomain
HOXA3_HOXA3	O43365_O43365	Homeodomain	Homeodomain
TLX3_TLX3	O43711_O43711	Homeodomain	Homeodomain
TLX2_TLX2	O43763_O43763	Homeodomain	Homeodomain
DLX3_DLX3	O60479_O60479	Homeodomain	Homeodomain
ONECUT2_ONECUT2	O95948_O95948	Homeodomain	Homeodomain
ONECUT2_SATB1	O95948_Q01826	Homeodomain	Homeodomain
HOXB2_HOXB2	P14652_P14652	Homeodomain	Homeodomain
POU2F1_POU2F1	P14859_P14859	Homeodomain	Homeodomain
HOXA5_HOXA5	P20719_P20719	Homeodomain	Homeodomain
PAX7_PAX7	P23759_P23759	Homeodomain	Homeodomain
PAX6_PAX6	P26367_P26367	Homeodomain	Homeodomain
HOXA10_HOXA10	P31260_P31260	Homeodomain	Homeodomain
HOXA9_HOXA9	P31269_P31269	Homeodomain	Homeodomain
HOXA11_HOXA11	P31270_P31270	Homeodomain	Homeodomain
TLX1_TLX1	P31314_P31314	Homeodomain	Homeodomain
OTX1_OTX1	P32242_P32242	Homeodomain	Homeodomain
OTX2_OTX2	P32243_P32243	Homeodomain	Homeodomain
HOXD12_HOXD12	P35452_P35452	Homeodomain	Homeodomain
LHX1_LHX1	P48742_P48742	Homeodomain	Homeodomain
LHX1_ISL2	P48742_Q96A47	Homeodomain	Homeodomain
HOXA1_HOXA1	P49639_P49639	Homeodomain	Homeodomain
LHX2_LHX2	P50458_P50458	Homeodomain	Homeodomain
PDX1_PDX1	P52945_P52945	Homeodomain	Homeodomain
PDX1_SATB2	P52945_Q9UPW6	Homeodomain	Homeodomain
GSC_GSC	P56915_P56915	Homeodomain	Homeodomain
PITX1_PITX1	P78337_P78337	Homeodomain	Homeodomain
HOXA4_HOXA4	Q00056_Q00056	Homeodomain	Homeodomain
SATB1_SATB1	Q01826_Q01826	Homeodomain	Homeodomain
SATB1_SATB2	Q01826_Q9UPW6	Homeodomain	Homeodomain
POU5F1_POU5F1	Q01860_Q01860	Homeodomain	Homeodomain
ISX_ISX	Q2M1V0_Q2M1V0	Homeodomain	Homeodomain
LHX8_LHX8	Q68G74_Q68G74	Homeodomain	Homeodomain
SIX5_SIX5	Q8N196_Q8N196	Homeodomain	Homeodomain
LHX4_LHX4	Q969G2_Q969G2	Homeodomain	Homeodomain
LHX4_ISL2	Q969G2_Q96A47	Homeodomain	Homeodomain
PITX2_PITX2	Q99697_Q99697	Homeodomain	Homeodomain
PBX4_PBX4	Q9BYU1_Q9BYU1	Homeodomain	Homeodomain
ALX4_ALX4	Q9H161_Q9H161	Homeodomain	Homeodomain
VSX1_VSX1	Q9NZR4_Q9NZR4	Homeodomain	Homeodomain
LHX3_ISL2	Q9UBR4_Q96A47	Homeodomain	Homeodomain
LHX3_LHX3	Q9UBR4_Q9UBR4	Homeodomain	Homeodomain
DUX4_DUX4	Q9UBX2_Q9UBX2	Homeodomain	Homeodomain
DUX4_SATB2	Q9UBX2_Q9UPW6	Homeodomain	Homeodomain
SIX4_SIX4	Q9UIU6_Q9UIU6	Homeodomain	Homeodomain
LHX6_LHX6	Q9UPM6_Q9UPM6	Homeodomain	Homeodomain
SATB2_PITX1	Q9UPW6_P78337	Homeodomain	Homeodomain
SATB2_SATB1	Q9UPW6_Q01826	Homeodomain	Homeodomain
SATB2_ZHX1	Q9UPW6_Q9UKY1	Homeodomain	Homeodomain
SATB2_SATB2	Q9UPW6_Q9UPW6	Homeodomain	Homeodomain
SATB2_ZHX2	Q9UPW6_Q9Y6X8	Homeodomain	Homeodomain
ZHX2_HOXA1	Q9Y6X8_P49639	Homeodomain	Homeodomain
ZHX2_ZHX2	Q9Y6X8_Q9Y6X8	Homeodomain	Homeodomain
DUXB_ZFHX4	A0A1W2PPF3_Q86UP3	Homeodomain	Homeodomain
DUXB_SATB2	A0A1W2PPF3_Q9UPW6	Homeodomain	Homeodomain
CPHXL2_ZFHX3	A0A1W2PPK0_Q15911	Homeodomain	Homeodomain
CPHXL2_ZFHX4	A0A1W2PPK0_Q86UP3	Homeodomain	Homeodomain
CPHXL_PBX2	A0A1W2PPM1_P40425	Homeodomain	Homeodomain
CPHXL_MNX1	A0A1W2PPM1_P50219	Homeodomain	Homeodomain
CPHXL_PITX1	A0A1W2PPM1_P78337	Homeodomain	Homeodomain
CPHXL_ZFHX4	A0A1W2PPM1_Q86UP3	Homeodomain	Homeodomain
CPHXL_SIX5	A0A1W2PPM1_Q8N196	Homeodomain	Homeodomain
CPHXL_ISL2	A0A1W2PPM1_Q96A47	Homeodomain	Homeodomain
CPHXL_SIX4	A0A1W2PPM1_Q9UIU6	Homeodomain	Homeodomain
CPHXL_SATB2	A0A1W2PPM1_Q9UPW6	Homeodomain	Homeodomain
DPRX_ZFHX3	A6NFQ7_Q15911	Homeodomain	Homeodomain
DPRX_ZFHX4	A6NFQ7_Q86UP3	Homeodomain	Homeodomain
DPRX_SATB2	A6NFQ7_Q9UPW6	Homeodomain	Homeodomain
ARGFX_ARGFX	A6NJG6_A6NJG6	Homeodomain	Homeodomain
LEUTX_SATB1	A8MZ59_Q01826	Homeodomain	Homeodomain
LEUTX_ZFHX3	A8MZ59_Q15911	Homeodomain	Homeodomain
LEUTX_ZFHX4	A8MZ59_Q86UP3	Homeodomain	Homeodomain
LEUTX_ZHX1	A8MZ59_Q9UKY1	Homeodomain	Homeodomain
LEUTX_SATB2	A8MZ59_Q9UPW6	Homeodomain	Homeodomain
LEUTX_ZHX2	A8MZ59_Q9Y6X8	Homeodomain	Homeodomain
CRX_POU2F1	O43186_P14859	Homeodomain	Homeodomain
CRX_HOXB9	O43186_P17482	Homeodomain	Homeodomain
CRX_PBX1	O43186_P40424	Homeodomain	Homeodomain
CRX_PBX2	O43186_P40425	Homeodomain	Homeodomain
CRX_MNX1	O43186_P50219	Homeodomain	Homeodomain
CRX_ZFHX3	O43186_Q15911	Homeodomain	Homeodomain
CRX_ZFHX4	O43186_Q86UP3	Homeodomain	Homeodomain
CRX_ISL2	O43186_Q96A47	Homeodomain	Homeodomain
CRX_ZHX1	O43186_Q9UKY1	Homeodomain	Homeodomain
CRX_SATB2	O43186_Q9UPW6	Homeodomain	Homeodomain
CRX_ZHX2	O43186_Q9Y6X8	Homeodomain	Homeodomain
HOXA2_HOXB2	O43364_P14652	Homeodomain	Homeodomain
HOXA2_PITX1	O43364_P78337	Homeodomain	Homeodomain
HOXA2_ZFHX4	O43364_Q86UP3	Homeodomain	Homeodomain
HOXA2_SIX4	O43364_Q9UIU6	Homeodomain	Homeodomain
HOXA2_SATB2	O43364_Q9UPW6	Homeodomain	Homeodomain
HOXA3_POU2F1	O43365_P14859	Homeodomain	Homeodomain
HOXA3_HOXB9	O43365_P17482	Homeodomain	Homeodomain
HOXA3_HOXA11	O43365_P31270	Homeodomain	Homeodomain
HOXA3_CUX1	O43365_P39880	Homeodomain	Homeodomain
HOXA3_MNX1	O43365_P50219	Homeodomain	Homeodomain
HOXA3_PITX1	O43365_P78337	Homeodomain	Homeodomain
HOXA3_SATB1	O43365_Q01826	Homeodomain	Homeodomain
HOXA3_ZFHX3	O43365_Q15911	Homeodomain	Homeodomain
HOXA3_ZFHX4	O43365_Q86UP3	Homeodomain	Homeodomain
HOXA3_SIX5	O43365_Q8N196	Homeodomain	Homeodomain
HOXA3_ISL2	O43365_Q96A47	Homeodomain	Homeodomain
HOXA3_NKX2-4	O43365_Q9H2Z4	Homeodomain	Homeodomain
HOXA3_SIX4	O43365_Q9UIU6	Homeodomain	Homeodomain
HOXA3_SATB2	O43365_Q9UPW6	Homeodomain	Homeodomain
TLX3_HOXC11	O43711_O43248	Homeodomain	Homeodomain
TLX3_POU2F1	O43711_P14859	Homeodomain	Homeodomain
TLX3_HOXB9	O43711_P17482	Homeodomain	Homeodomain
TLX3_HOXC9	O43711_P31274	Homeodomain	Homeodomain
TLX3_CUX1	O43711_P39880	Homeodomain	Homeodomain
TLX3_MNX1	O43711_P50219	Homeodomain	Homeodomain
TLX3_NKX2-5	O43711_P52952	Homeodomain	Homeodomain
TLX3_PITX1	O43711_P78337	Homeodomain	Homeodomain
TLX3_SATB1	O43711_Q01826	Homeodomain	Homeodomain
TLX3_ZFHX3	O43711_Q15911	Homeodomain	Homeodomain
TLX3_ZFHX4	O43711_Q86UP3	Homeodomain	Homeodomain
TLX3_SATB2	O43711_Q9UPW6	Homeodomain	Homeodomain
TLX2_CUX1	O43763_P39880	Homeodomain	Homeodomain
TLX2_MNX1	O43763_P50219	Homeodomain	Homeodomain
TLX2_SATB1	O43763_Q01826	Homeodomain	Homeodomain
TLX2_ZFHX3	O43763_Q15911	Homeodomain	Homeodomain
TLX2_SATB2	O43763_Q9UPW6	Homeodomain	Homeodomain
DLX3_HOXC9	O60479_P31274	Homeodomain	Homeodomain
DLX3_CUX1	O60479_P39880	Homeodomain	Homeodomain
DLX3_PITX1	O60479_P78337	Homeodomain	Homeodomain
DLX3_ZFHX3	O60479_Q15911	Homeodomain	Homeodomain
DLX3_ZFHX4	O60479_Q86UP3	Homeodomain	Homeodomain
DLX3_SIX5	O60479_Q8N196	Homeodomain	Homeodomain
DLX3_SIX4	O60479_Q9UIU6	Homeodomain	Homeodomain
ONECUT2_CUX2	O95948_O14529	Homeodomain	Homeodomain
ONECUT2_POU2F1	O95948_P14859	Homeodomain	Homeodomain
ONECUT2_HOXA10	O95948_P31260	Homeodomain	Homeodomain
ONECUT2_CUX1	O95948_P39880	Homeodomain	Homeodomain
ONECUT2_MNX1	O95948_P50219	Homeodomain	Homeodomain
ONECUT2_PITX1	O95948_P78337	Homeodomain	Homeodomain
ONECUT2_POU5F1	O95948_Q01860	Homeodomain	Homeodomain
ONECUT2_HMBOX1	O95948_Q6NT76	Homeodomain	Homeodomain
ONECUT2_ZFHX4	O95948_Q86UP3	Homeodomain	Homeodomain
ONECUT2_ISL2	O95948_Q96A47	Homeodomain	Homeodomain
ONECUT2_NKX2-4	O95948_Q9H2Z4	Homeodomain	Homeodomain
ONECUT2_SIX4	O95948_Q9UIU6	Homeodomain	Homeodomain
ONECUT2_SATB2	O95948_Q9UPW6	Homeodomain	Homeodomain
HOXB2_ZFHX3	P14652_Q15911	Homeodomain	Homeodomain
HOXB2_ZFHX4	P14652_Q86UP3	Homeodomain	Homeodomain
HOXB2_SIX4	P14652_Q9UIU6	Homeodomain	Homeodomain
HOXB2_ZHX1	P14652_Q9UKY1	Homeodomain	Homeodomain
HOXB2_SATB2	P14652_Q9UPW6	Homeodomain	Homeodomain
POU2F1_HOXB9	P14859_P17482	Homeodomain	Homeodomain
POU2F1_HOXD11	P14859_P31277	Homeodomain	Homeodomain
POU2F1_HOXD13	P14859_P35453	Homeodomain	Homeodomain
POU2F1_MSX2	P14859_P35548	Homeodomain	Homeodomain
POU2F1_MNX1	P14859_P50219	Homeodomain	Homeodomain
POU2F1_PITX1	P14859_P78337	Homeodomain	Homeodomain
POU2F1_SATB1	P14859_Q01826	Homeodomain	Homeodomain
POU2F1_ZFHX3	P14859_Q15911	Homeodomain	Homeodomain
POU2F1_ZFHX4	P14859_Q86UP3	Homeodomain	Homeodomain
POU2F1_SIX5	P14859_Q8N196	Homeodomain	Homeodomain
POU2F1_ZFHX2	P14859_Q9C0A1	Homeodomain	Homeodomain
POU2F1_NKX2-4	P14859_Q9H2Z4	Homeodomain	Homeodomain
POU2F1_SIX4	P14859_Q9UIU6	Homeodomain	Homeodomain
POU2F1_ZHX1	P14859_Q9UKY1	Homeodomain	Homeodomain
POU2F1_SATB2	P14859_Q9UPW6	Homeodomain	Homeodomain
POU2F1_ZHX2	P14859_Q9Y6X8	Homeodomain	Homeodomain
HOXA5_HOXB9	P20719_P17482	Homeodomain	Homeodomain
HOXA5_PAX6	P20719_P26367	Homeodomain	Homeodomain
HOXA5_HOXA11	P20719_P31270	Homeodomain	Homeodomain
HOXA5_CUX1	P20719_P39880	Homeodomain	Homeodomain
HOXA5_PBX2	P20719_P40425	Homeodomain	Homeodomain
HOXA5_PITX1	P20719_P78337	Homeodomain	Homeodomain
HOXA5_ZFHX3	P20719_Q15911	Homeodomain	Homeodomain
HOXA5_ZFHX4	P20719_Q86UP3	Homeodomain	Homeodomain
HOXA5_NKX2-4	P20719_Q9H2Z4	Homeodomain	Homeodomain
HOXA5_SATB2	P20719_Q9UPW6	Homeodomain	Homeodomain
PAX7_POU2F1	P23759_P14859	Homeodomain	Homeodomain
PAX7_MNX1	P23759_P50219	Homeodomain	Homeodomain
PAX7_SATB1	P23759_Q01826	Homeodomain	Homeodomain
PAX7_ZFHX3	P23759_Q15911	Homeodomain	Homeodomain
PAX7_ZFHX4	P23759_Q86UP3	Homeodomain	Homeodomain
PAX7_SIX4	P23759_Q9UIU6	Homeodomain	Homeodomain
PAX7_SATB2	P23759_Q9UPW6	Homeodomain	Homeodomain
PAX6_POU2F1	P26367_P14859	Homeodomain	Homeodomain
PAX6_CUX1	P26367_P39880	Homeodomain	Homeodomain
PAX6_MNX1	P26367_P50219	Homeodomain	Homeodomain
PAX6_SATB1	P26367_Q01826	Homeodomain	Homeodomain
PAX6_ZFHX3	P26367_Q15911	Homeodomain	Homeodomain
PAX6_ZFHX4	P26367_Q86UP3	Homeodomain	Homeodomain
PAX6_SIX4	P26367_Q9UIU6	Homeodomain	Homeodomain
PAX6_ZHX1	P26367_Q9UKY1	Homeodomain	Homeodomain
PAX6_SATB2	P26367_Q9UPW6	Homeodomain	Homeodomain
PAX6_ZHX2	P26367_Q9Y6X8	Homeodomain	Homeodomain
HOXA10_HOXB9	P31260_P17482	Homeodomain	Homeodomain
HOXA10_PAX6	P31260_P26367	Homeodomain	Homeodomain
HOXA10_HOXA9	P31260_P31269	Homeodomain	Homeodomain
HOXA10_CUX1	P31260_P39880	Homeodomain	Homeodomain
HOXA10_HOXA1	P31260_P49639	Homeodomain	Homeodomain
HOXA10_MNX1	P31260_P50219	Homeodomain	Homeodomain
HOXA10_PITX1	P31260_P78337	Homeodomain	Homeodomain
HOXA10_SATB1	P31260_Q01826	Homeodomain	Homeodomain
HOXA10_ZFHX3	P31260_Q15911	Homeodomain	Homeodomain
HOXA10_HMBOX1	P31260_Q6NT76	Homeodomain	Homeodomain
HOXA10_ZFHX4	P31260_Q86UP3	Homeodomain	Homeodomain
HOXA10_SIX5	P31260_Q8N196	Homeodomain	Homeodomain
HOXA10_ISL2	P31260_Q96A47	Homeodomain	Homeodomain
HOXA10_NKX2-4	P31260_Q9H2Z4	Homeodomain	Homeodomain
HOXA10_SIX4	P31260_Q9UIU6	Homeodomain	Homeodomain
HOXA10_ZHX1	P31260_Q9UKY1	Homeodomain	Homeodomain
HOXA10_SATB2	P31260_Q9UPW6	Homeodomain	Homeodomain
HOXA9_HOXB9	P31269_P17482	Homeodomain	Homeodomain
HOXA9_PAX6	P31269_P26367	Homeodomain	Homeodomain
HOXA9_HOXA10	P31269_P31260	Homeodomain	Homeodomain
HOXA9_PITX1	P31269_P78337	Homeodomain	Homeodomain
HOXA9_ZFHX3	P31269_Q15911	Homeodomain	Homeodomain
HOXA9_ZFHX4	P31269_Q86UP3	Homeodomain	Homeodomain
HOXA9_NKX2-4	P31269_Q9H2Z4	Homeodomain	Homeodomain
HOXA9_SIX4	P31269_Q9UIU6	Homeodomain	Homeodomain
HOXA11_PITX1	P31270_P78337	Homeodomain	Homeodomain
HOXA11_ZFHX4	P31270_Q86UP3	Homeodomain	Homeodomain
HOXA11_SATB2	P31270_Q9UPW6	Homeodomain	Homeodomain
HOXA13_HOXA13	P31271_P31271	Homeodomain	Homeodomain
TLX1_HOXB9	P31314_P17482	Homeodomain	Homeodomain
TLX1_CUX1	P31314_P39880	Homeodomain	Homeodomain
TLX1_PBX2	P31314_P40425	Homeodomain	Homeodomain
TLX1_MNX1	P31314_P50219	Homeodomain	Homeodomain
TLX1_SATB1	P31314_Q01826	Homeodomain	Homeodomain
TLX1_ZFHX3	P31314_Q15911	Homeodomain	Homeodomain
TLX1_ZFHX4	P31314_Q86UP3	Homeodomain	Homeodomain
TLX1_SIX4	P31314_Q9UIU6	Homeodomain	Homeodomain
TLX1_SATB2	P31314_Q9UPW6	Homeodomain	Homeodomain
OTX1_CRX	P32242_O43186	Homeodomain	Homeodomain
OTX1_POU2F1	P32242_P14859	Homeodomain	Homeodomain
OTX1_ZFHX3	P32242_Q15911	Homeodomain	Homeodomain
OTX1_ZFHX4	P32242_Q86UP3	Homeodomain	Homeodomain
OTX2_PBX2	P32243_P40425	Homeodomain	Homeodomain
OTX2_ZFHX3	P32243_Q15911	Homeodomain	Homeodomain
OTX2_ZFHX4	P32243_Q86UP3	Homeodomain	Homeodomain
HOXD12_POU2F1	P35452_P14859	Homeodomain	Homeodomain
HOXD12_HOXB9	P35452_P17482	Homeodomain	Homeodomain
HOXD12_CUX1	P35452_P39880	Homeodomain	Homeodomain
HOXD12_MNX1	P35452_P50219	Homeodomain	Homeodomain
HOXD12_PITX1	P35452_P78337	Homeodomain	Homeodomain
HOXD12_SATB1	P35452_Q01826	Homeodomain	Homeodomain
HOXD12_HMBOX1	P35452_Q6NT76	Homeodomain	Homeodomain
HOXD12_ZFHX4	P35452_Q86UP3	Homeodomain	Homeodomain
HOXD12_SIX4	P35452_Q9UIU6	Homeodomain	Homeodomain
HOXD12_ZHX1	P35452_Q9UKY1	Homeodomain	Homeodomain
HOXD12_SATB2	P35452_Q9UPW6	Homeodomain	Homeodomain
HOXD12_ZHX2	P35452_Q9Y6X8	Homeodomain	Homeodomain
LHX1_SATB1	P48742_Q01826	Homeodomain	Homeodomain
LHX1_ZFHX4	P48742_Q86UP3	Homeodomain	Homeodomain
LHX1_SATB2	P48742_Q9UPW6	Homeodomain	Homeodomain
HOXA1_MNX1	P49639_P50219	Homeodomain	Homeodomain
HOXA1_PITX1	P49639_P78337	Homeodomain	Homeodomain
HOXA1_ISL2	P49639_Q96A47	Homeodomain	Homeodomain
HOXA1_SIX4	P49639_Q9UIU6	Homeodomain	Homeodomain
LHX2_CUX1	P50458_P39880	Homeodomain	Homeodomain
LHX2_SATB1	P50458_Q01826	Homeodomain	Homeodomain
LHX2_ZFHX3	P50458_Q15911	Homeodomain	Homeodomain
LHX2_ZFHX4	P50458_Q86UP3	Homeodomain	Homeodomain
LHX2_ISL2	P50458_Q96A47	Homeodomain	Homeodomain
LHX2_SATB2	P50458_Q9UPW6	Homeodomain	Homeodomain
LHX2_ZHX2	P50458_Q9Y6X8	Homeodomain	Homeodomain
PDX1_POU2F1	P52945_P14859	Homeodomain	Homeodomain
PDX1_HOXB9	P52945_P17482	Homeodomain	Homeodomain
PDX1_HOXA5	P52945_P20719	Homeodomain	Homeodomain
PDX1_HOXA11	P52945_P31270	Homeodomain	Homeodomain
PDX1_HOXA13	P52945_P31271	Homeodomain	Homeodomain
PDX1_CUX1	P52945_P39880	Homeodomain	Homeodomain
PDX1_PBX2	P52945_P40425	Homeodomain	Homeodomain
PDX1_MNX1	P52945_P50219	Homeodomain	Homeodomain
PDX1_PITX1	P52945_P78337	Homeodomain	Homeodomain
PDX1_SATB1	P52945_Q01826	Homeodomain	Homeodomain
PDX1_ZFHX3	P52945_Q15911	Homeodomain	Homeodomain
PDX1_HMBOX1	P52945_Q6NT76	Homeodomain	Homeodomain
PDX1_ZFHX4	P52945_Q86UP3	Homeodomain	Homeodomain
PDX1_SIX5	P52945_Q8N196	Homeodomain	Homeodomain
PDX1_ISL2	P52945_Q96A47	Homeodomain	Homeodomain
PDX1_NKX2-4	P52945_Q9H2Z4	Homeodomain	Homeodomain
PDX1_SIX4	P52945_Q9UIU6	Homeodomain	Homeodomain
NKX2-5_NKX2-5	P52952_P52952	Homeodomain	Homeodomain
NKX2-5_NKX2-4	P52952_Q9H2Z4	Homeodomain	Homeodomain
GSC_POU2F1	P56915_P14859	Homeodomain	Homeodomain
GSC_PBX2	P56915_P40425	Homeodomain	Homeodomain
GSC_ZFHX3	P56915_Q15911	Homeodomain	Homeodomain
GSC_ZFHX4	P56915_Q86UP3	Homeodomain	Homeodomain
GSC_SATB2	P56915_Q9UPW6	Homeodomain	Homeodomain
PITX1_ZFHX3	P78337_Q15911	Homeodomain	Homeodomain
PITX1_ZFHX4	P78337_Q86UP3	Homeodomain	Homeodomain
PITX1_SATB2	P78337_Q9UPW6	Homeodomain	Homeodomain
HOXA4_HOXB9	Q00056_P17482	Homeodomain	Homeodomain
HOXA4_PBX1	Q00056_P40424	Homeodomain	Homeodomain
HOXA4_PBX2	Q00056_P40425	Homeodomain	Homeodomain
HOXA4_MNX1	Q00056_P50219	Homeodomain	Homeodomain
HOXA4_PITX1	Q00056_P78337	Homeodomain	Homeodomain
HOXA4_HMBOX1	Q00056_Q6NT76	Homeodomain	Homeodomain
HOXA4_NKX2-4	Q00056_Q9H2Z4	Homeodomain	Homeodomain
SATB1_CUX2	Q01826_O14529	Homeodomain	Homeodomain
SATB1_CUX1	Q01826_P39880	Homeodomain	Homeodomain
SATB1_ZFHX3	Q01826_Q15911	Homeodomain	Homeodomain
SATB1_ZFHX4	Q01826_Q86UP3	Homeodomain	Homeodomain
SATB1_ZHX1	Q01826_Q9UKY1	Homeodomain	Homeodomain
SATB1_ZHX2	Q01826_Q9Y6X8	Homeodomain	Homeodomain
POU5F1_PITX1	Q01860_P78337	Homeodomain	Homeodomain
POU5F1_ZFHX4	Q01860_Q86UP3	Homeodomain	Homeodomain
POU5F1_SIX5	Q01860_Q8N196	Homeodomain	Homeodomain
POU5F1_SIX4	Q01860_Q9UIU6	Homeodomain	Homeodomain
ISX_ZFHX4	Q2M1V0_Q86UP3	Homeodomain	Homeodomain
LHX8_ISL2	Q68G74_Q96A47	Homeodomain	Homeodomain
SIX5_POU2F1	Q8N196_P14859	Homeodomain	Homeodomain
SIX5_SIX4	Q8N196_Q9UIU6	Homeodomain	Homeodomain
HOXB13_HOXB13	Q92826_Q92826	Homeodomain	Homeodomain
LHX4_SATB1	Q969G2_Q01826	Homeodomain	Homeodomain
LHX4_ZHX1	Q969G2_Q9UKY1	Homeodomain	Homeodomain
LHX4_SATB2	Q969G2_Q9UPW6	Homeodomain	Homeodomain
LHX4_ZHX2	Q969G2_Q9Y6X8	Homeodomain	Homeodomain
PITX2_PITX1	Q99697_P78337	Homeodomain	Homeodomain
PITX2_ZFHX3	Q99697_Q15911	Homeodomain	Homeodomain
PITX2_ZFHX4	Q99697_Q86UP3	Homeodomain	Homeodomain
PITX2_SATB2	Q99697_Q9UPW6	Homeodomain	Homeodomain
PBX4_PBX1	Q9BYU1_P40424	Homeodomain	Homeodomain
PBX4_ADNP	Q9BYU1_Q9H2P0	Homeodomain	Homeodomain
PBX4_SIX4	Q9BYU1_Q9UIU6	Homeodomain	Homeodomain
ALX4_ZFHX4	Q9H161_Q86UP3	Homeodomain	Homeodomain
VSX1_HOXB9	Q9NZR4_P17482	Homeodomain	Homeodomain
VSX1_SATB1	Q9NZR4_Q01826	Homeodomain	Homeodomain
VSX1_ZFHX3	Q9NZR4_Q15911	Homeodomain	Homeodomain
VSX1_ZFHX4	Q9NZR4_Q86UP3	Homeodomain	Homeodomain
VSX1_SATB2	Q9NZR4_Q9UPW6	Homeodomain	Homeodomain
LHX3_CUX1	Q9UBR4_P39880	Homeodomain	Homeodomain
LHX3_MNX1	Q9UBR4_P50219	Homeodomain	Homeodomain
LHX3_ZFHX4	Q9UBR4_Q86UP3	Homeodomain	Homeodomain
LHX3_SIX4	Q9UBR4_Q9UIU6	Homeodomain	Homeodomain
LHX3_ZHX1	Q9UBR4_Q9UKY1	Homeodomain	Homeodomain
LHX3_SATB2	Q9UBR4_Q9UPW6	Homeodomain	Homeodomain
LHX3_ZHX2	Q9UBR4_Q9Y6X8	Homeodomain	Homeodomain
DUX4_CUX1	Q9UBX2_P39880	Homeodomain	Homeodomain
DUX4_SATB1	Q9UBX2_Q01826	Homeodomain	Homeodomain
LHX6_LHX8	Q9UPM6_Q68G74	Homeodomain	Homeodomain
SATB2_HOXB9	Q9UPW6_P17482	Homeodomain	Homeodomain
SATB2_CUX1	Q9UPW6_P39880	Homeodomain	Homeodomain
SATB2_MNX1	Q9UPW6_P50219	Homeodomain	Homeodomain
SATB2_ZFHX3	Q9UPW6_Q15911	Homeodomain	Homeodomain
SATB2_ZFHX4	Q9UPW6_Q86UP3	Homeodomain	Homeodomain
SATB2_SIX5	Q9UPW6_Q8N196	Homeodomain	Homeodomain
SATB2_NKX2-4	Q9UPW6_Q9H2Z4	Homeodomain	Homeodomain
SATB2_ZHX3	Q9UPW6_Q9H4I2	Homeodomain	Homeodomain
SATB2_SIX4	Q9UPW6_Q9UIU6	Homeodomain	Homeodomain
ZHX2_CERS2	Q9Y6X8_Q96G23	Homeodomain	Homeodomain
ZHX2_NKX2-4	Q9Y6X8_Q9H2Z4	Homeodomain	Homeodomain
CPHXL_ETV6	A0A1W2PPM1_P41212	Homeodomain	Ets
CPHXL_ERF	A0A1W2PPM1_P50548	Homeodomain	Ets
CPHXL_FLI1	A0A1W2PPM1_Q01543	Homeodomain	Ets
LEUTX_FLI1	A8MZ59_Q01543	Homeodomain	Ets
LEUTX_ELF2	A8MZ59_Q15723	Homeodomain	Ets
ETV2_PAX6	O00321_P26367	Ets	Homeodomain
ETV2_DLX6	O00321_P56179	Ets	Homeodomain
ETV2_ZFHX3	O00321_Q15911	Ets	Homeodomain
ETV2_ISL2	O00321_Q96A47	Ets	Homeodomain
ETV2_NKX2-4	O00321_Q9H2Z4	Ets	Homeodomain
CRX_ERF	O43186_P50548	Homeodomain	Ets
CRX_FLI1	O43186_Q01543	Homeodomain	Ets
HOXA2_ELF1	O43364_P32519	Homeodomain	Ets
HOXA3_ELF1	O43365_P32519	Homeodomain	Ets
HOXA3_ETV6	O43365_P41212	Homeodomain	Ets
HOXA3_ERF	O43365_P50548	Homeodomain	Ets
HOXA3_FLI1	O43365_Q01543	Homeodomain	Ets
DLX3_ETV6	O60479_P41212	Homeodomain	Ets
DLX3_ERF	O60479_P50548	Homeodomain	Ets
DLX3_FLI1	O60479_Q01543	Homeodomain	Ets
ONECUT2_ERG	O95948_P11308	Homeodomain	Ets
ONECUT2_ELF1	O95948_P32519	Homeodomain	Ets
ONECUT2_ERF	O95948_P50548	Homeodomain	Ets
ONECUT2_FLI1	O95948_Q01543	Homeodomain	Ets
ONECUT2_ELF2	O95948_Q15723	Homeodomain	Ets
ERG_ZFHX4	P11308_Q86UP3	Ets	Homeodomain
ERG_ISL2	P11308_Q96A47	Ets	Homeodomain
ERG_SATB2	P11308_Q9UPW6	Ets	Homeodomain
HOXB2_FLI1	P14652_Q01543	Homeodomain	Ets
POU2F1_ELF1	P14859_P32519	Homeodomain	Ets
POU2F1_FLI1	P14859_Q01543	Homeodomain	Ets
POU2F1_ELF2	P14859_Q15723	Homeodomain	Ets
POU2F1_ELF4	P14859_Q99607	Homeodomain	Ets
SPI1_ZFHX3	P17947_Q15911	Ets	Homeodomain
SPI1_ZFHX4	P17947_Q86UP3	Ets	Homeodomain
SPI1_CERS2	P17947_Q96G23	Ets	Homeodomain
SPI1_ADNP	P17947_Q9H2P0	Ets	Homeodomain
SPI1_ZHX1	P17947_Q9UKY1	Ets	Homeodomain
ELK1_SIX5	P19419_Q8N196	Ets	Homeodomain
HOXA5_ELF1	P20719_P32519	Homeodomain	Ets
HOXA5_ERF	P20719_P50548	Homeodomain	Ets
HOXA5_FLI1	P20719_Q01543	Homeodomain	Ets
PAX7_FLI1	P23759_Q01543	Homeodomain	Ets
PAX6_ELF2	P26367_Q15723	Homeodomain	Ets
HOXA10_ETV6	P31260_P41212	Homeodomain	Ets
HOXA10_ERF	P31260_P50548	Homeodomain	Ets
HOXA10_FLI1	P31260_Q01543	Homeodomain	Ets
HOXA9_ERG	P31269_P11308	Homeodomain	Ets
HOXA9_ERF	P31269_P50548	Homeodomain	Ets
HOXA9_FLI1	P31269_Q01543	Homeodomain	Ets
HOXA11_ERF	P31270_P50548	Homeodomain	Ets
HOXA11_FLI1	P31270_Q01543	Homeodomain	Ets
OTX2_FLI1	P32243_Q01543	Homeodomain	Ets
ELF1_ZHX2	P32519_Q9Y6X8	Ets	Homeodomain
HOXD12_ELF1	P35452_P32519	Homeodomain	Ets
HOXD12_ETV6	P35452_P41212	Homeodomain	Ets
HOXD12_FLI1	P35452_Q01543	Homeodomain	Ets
HOXD12_ELF2	P35452_Q15723	Homeodomain	Ets
ETV3_SATB1	P41162_Q01826	Ets	Homeodomain
ELK3_POU2F1	P41970_P14859	Ets	Homeodomain
ELK3_MNX1	P41970_P50219	Ets	Homeodomain
ELK3_ZFHX4	P41970_Q86UP3	Ets	Homeodomain
ELK3_ZHX1	P41970_Q9UKY1	Ets	Homeodomain
ELK3_SATB2	P41970_Q9UPW6	Ets	Homeodomain
ELK3_ZHX2	P41970_Q9Y6X8	Ets	Homeodomain
HOXA1_ELF1	P49639_P32519	Homeodomain	Ets
HOXA1_ETV6	P49639_P41212	Homeodomain	Ets
HOXA1_FLI1	P49639_Q01543	Homeodomain	Ets
LHX2_ELF2	P50458_Q15723	Homeodomain	Ets
PDX1_ERF	P52945_P50548	Homeodomain	Ets
PDX1_FLI1	P52945_Q01543	Homeodomain	Ets
GSC_FLI1	P56915_Q01543	Homeodomain	Ets
HOXA4_ERF	Q00056_P50548	Homeodomain	Ets
HOXA4_FLI1	Q00056_Q01543	Homeodomain	Ets
FLI1_HOXD11	Q01543_P31277	Ets	Homeodomain
FLI1_ZFHX3	Q01543_Q15911	Ets	Homeodomain
FLI1_ZFHX4	Q01543_Q86UP3	Ets	Homeodomain
FLI1_ISL2	Q01543_Q96A47	Ets	Homeodomain
FLI1_CERS2	Q01543_Q96G23	Ets	Homeodomain
FLI1_PITX2	Q01543_Q99697	Ets	Homeodomain
FLI1_NKX2-4	Q01543_Q9H2Z4	Ets	Homeodomain
SATB1_ELF1	Q01826_P32519	Homeodomain	Ets
POU5F1_ERF	Q01860_P50548	Homeodomain	Ets
POU5F1_FLI1	Q01860_Q01543	Homeodomain	Ets
SPIB_CERS2	Q01892_Q96G23	Ets	Homeodomain
SPIB_SIX4	Q01892_Q9UIU6	Ets	Homeodomain
GABPA_ZHX1	Q06546_Q9UKY1	Ets	Homeodomain
ELF2_POU2F1	Q15723_P14859	Ets	Homeodomain
ELF2_ZHX2	Q15723_Q9Y6X8	Ets	Homeodomain
ETV3L_MNX1	Q6ZN32_P50219	Ets	Homeodomain
ETV3L_ZFHX4	Q6ZN32_Q86UP3	Ets	Homeodomain
SIX5_ELF2	Q8N196_Q15723	Homeodomain	Ets
SPIC_ZFHX3	Q8N5J4_Q15911	Ets	Homeodomain
SPIC_ZFHX4	Q8N5J4_Q86UP3	Ets	Homeodomain
SPIC_CERS2	Q8N5J4_Q96G23	Ets	Homeodomain
SPIC_PITX2	Q8N5J4_Q99697	Ets	Homeodomain
SPIC_ZHX2	Q8N5J4_Q9Y6X8	Ets	Homeodomain
LHX4_GABPA	Q969G2_Q06546	Homeodomain	Ets
LHX4_ELF2	Q969G2_Q15723	Homeodomain	Ets
FEV_POU2F1	Q99581_P14859	Ets	Homeodomain
FEV_HOXB9	Q99581_P17482	Ets	Homeodomain
FEV_HOXC9	Q99581_P31274	Ets	Homeodomain
FEV_CUX1	Q99581_P39880	Ets	Homeodomain
FEV_PBX2	Q99581_P40425	Ets	Homeodomain
FEV_MNX1	Q99581_P50219	Ets	Homeodomain
FEV_SATB1	Q99581_Q01826	Ets	Homeodomain
FEV_ZFHX3	Q99581_Q15911	Ets	Homeodomain
FEV_ZFHX4	Q99581_Q86UP3	Ets	Homeodomain
FEV_SIX5	Q99581_Q8N196	Ets	Homeodomain
FEV_SIX4	Q99581_Q9UIU6	Ets	Homeodomain
FEV_ZHX1	Q99581_Q9UKY1	Ets	Homeodomain
FEV_SATB2	Q99581_Q9UPW6	Ets	Homeodomain
FEV_ZHX2	Q99581_Q9Y6X8	Ets	Homeodomain
ELF4_ZHX1	Q99607_Q9UKY1	Ets	Homeodomain
ELF4_ZHX2	Q99607_Q9Y6X8	Ets	Homeodomain
LHX3_GABPA	Q9UBR4_Q06546	Homeodomain	Ets
DUX4_ELF1	Q9UBX2_P32519	Homeodomain	Ets
DUX4_ELF2	Q9UBX2_Q15723	Homeodomain	Ets
ELF5_NKX2-5	Q9UKW6_P52952	Ets	Homeodomain
ELF5_SATB1	Q9UKW6_Q01826	Ets	Homeodomain
ELF5_SATB2	Q9UKW6_Q9UPW6	Ets	Homeodomain
SATB2_ERF	Q9UPW6_P50548	Homeodomain	Ets
SATB2_FLI1	Q9UPW6_Q01543	Homeodomain	Ets
SATB2_ELF2	Q9UPW6_Q15723	Homeodomain	Ets
ETV7_MNX1	Q9Y603_P50219	Ets	Homeodomain
ETV7_NKX2-4	Q9Y603_Q9H2Z4	Ets	Homeodomain
ETV7_SATB2	Q9Y603_Q9UPW6	Ets	Homeodomain
ZHX2_FLI1	Q9Y6X8_Q01543	Homeodomain	Ets
DUX4_ZSCAN4	Q9UBX2_Q8NAM6	Homeodomain	zf-C2H2
SATB2_ZNF536	Q9UPW6_O15090	Homeodomain	zf-C2H2
SATB2_ZNF217	Q9UPW6_O75362	Homeodomain	zf-C2H2
SATB2_ZBTB7A	Q9UPW6_O95365	Homeodomain	zf-C2H2
SATB2_HIVEP1	Q9UPW6_P15822	Homeodomain	zf-C2H2
SATB2_ZNF423	Q9UPW6_Q2M1K9	Homeodomain	zf-C2H2
SATB2_ZNF592	Q9UPW6_Q92610	Homeodomain	zf-C2H2
SATB2_ZNF521	Q9UPW6_Q96K83	Homeodomain	zf-C2H2
SATB2_BCL11A	Q9UPW6_Q9H165	Homeodomain	zf-C2H2
SATB2_SALL1	Q9UPW6_Q9NSC2	Homeodomain	zf-C2H2
SATB2_ZNF629	Q9UPW6_Q9UEG4	Homeodomain	zf-C2H2
SATB2_ZBTB21	Q9UPW6_Q9ULJ3	Homeodomain	zf-C2H2
SATB2_ZNF281	Q9UPW6_Q9Y2X9	Homeodomain	zf-C2H2
DUXB_ZFHX4	A0A1W2PPF3_Q86UP3	Homeodomain	zf-C2H2
CPHXL2_ZFHX3	A0A1W2PPK0_Q15911	Homeodomain	zf-C2H2
CPHXL2_ZFHX4	A0A1W2PPK0_Q86UP3	Homeodomain	zf-C2H2
CPHXL_ZNF195	A0A1W2PPM1_O14628	Homeodomain	zf-C2H2
CPHXL_ZNF536	A0A1W2PPM1_O15090	Homeodomain	zf-C2H2
CPHXL_ZNF217	A0A1W2PPM1_O75362	Homeodomain	zf-C2H2
CPHXL_MECOM	A0A1W2PPM1_Q03112	Homeodomain	zf-C2H2
CPHXL_ZFHX4	A0A1W2PPM1_Q86UP3	Homeodomain	zf-C2H2
CPHXL_ZNF516	A0A1W2PPM1_Q92618	Homeodomain	zf-C2H2
CPHXL_RREB1	A0A1W2PPM1_Q92766	Homeodomain	zf-C2H2
CPHXL_ZNF521	A0A1W2PPM1_Q96K83	Homeodomain	zf-C2H2
CPHXL_BCL11A	A0A1W2PPM1_Q9H165	Homeodomain	zf-C2H2
CPHXL_PRDM16	A0A1W2PPM1_Q9HAZ2	Homeodomain	zf-C2H2
CPHXL_PRDM6	A0A1W2PPM1_Q9NQX0	Homeodomain	zf-C2H2
CPHXL_SALL1	A0A1W2PPM1_Q9NSC2	Homeodomain	zf-C2H2
CPHXL_SALL2	A0A1W2PPM1_Q9Y467	Homeodomain	zf-C2H2
DPRX_ZFHX3	A6NFQ7_Q15911	Homeodomain	zf-C2H2
DPRX_ZFHX4	A6NFQ7_Q86UP3	Homeodomain	zf-C2H2
LEUTX_ZEB2	A8MZ59_O60315	Homeodomain	zf-C2H2
LEUTX_ZNF217	A8MZ59_O75362	Homeodomain	zf-C2H2
LEUTX_HIVEP1	A8MZ59_P15822	Homeodomain	zf-C2H2
LEUTX_YY1	A8MZ59_P25490	Homeodomain	zf-C2H2
LEUTX_ZEB1	A8MZ59_P37275	Homeodomain	zf-C2H2
LEUTX_ZFHX3	A8MZ59_Q15911	Homeodomain	zf-C2H2
LEUTX_ZFHX4	A8MZ59_Q86UP3	Homeodomain	zf-C2H2
LEUTX_RREB1	A8MZ59_Q92766	Homeodomain	zf-C2H2
LEUTX_SALL1	A8MZ59_Q9NSC2	Homeodomain	zf-C2H2
LEUTX_ZNF148	A8MZ59_Q9UQR1	Homeodomain	zf-C2H2
LEUTX_ZNF281	A8MZ59_Q9Y2X9	Homeodomain	zf-C2H2
LEUTX_SALL2	A8MZ59_Q9Y467	Homeodomain	zf-C2H2
ZBTB7B_ZHX1	O15156_Q9UKY1	zf-C2H2	Homeodomain
CRX_ZNF536	O43186_O15090	Homeodomain	zf-C2H2
CRX_ZEB2	O43186_O60315	Homeodomain	zf-C2H2
CRX_ZNF217	O43186_O75362	Homeodomain	zf-C2H2
CRX_MECOM	O43186_Q03112	Homeodomain	zf-C2H2
CRX_RLF	O43186_Q13129	Homeodomain	zf-C2H2
CRX_ZFHX3	O43186_Q15911	Homeodomain	zf-C2H2
CRX_ZFHX4	O43186_Q86UP3	Homeodomain	zf-C2H2
CRX_RREB1	O43186_Q92766	Homeodomain	zf-C2H2
CRX_PRDM16	O43186_Q9HAZ2	Homeodomain	zf-C2H2
CRX_SALL1	O43186_Q9NSC2	Homeodomain	zf-C2H2
CRX_ZNF148	O43186_Q9UQR1	Homeodomain	zf-C2H2
HOXA2_ZNF195	O43364_O14628	Homeodomain	zf-C2H2
HOXA2_ZNF536	O43364_O15090	Homeodomain	zf-C2H2
HOXA2_ZNF217	O43364_O75362	Homeodomain	zf-C2H2
HOXA2_SP1	O43364_P08047	Homeodomain	zf-C2H2
HOXA2_YY1	O43364_P25490	Homeodomain	zf-C2H2
HOXA2_MECOM	O43364_Q03112	Homeodomain	zf-C2H2
HOXA2_ZNF362	O43364_Q5T0B9	Homeodomain	zf-C2H2
HOXA2_ZFHX4	O43364_Q86UP3	Homeodomain	zf-C2H2
HOXA2_ZNF592	O43364_Q92610	Homeodomain	zf-C2H2
HOXA2_ZNF516	O43364_Q92618	Homeodomain	zf-C2H2
HOXA2_RREB1	O43364_Q92766	Homeodomain	zf-C2H2
HOXA2_BCL11A	O43364_Q9H165	Homeodomain	zf-C2H2
HOXA2_SALL1	O43364_Q9NSC2	Homeodomain	zf-C2H2
HOXA2_ZNF629	O43364_Q9UEG4	Homeodomain	zf-C2H2
HOXA2_ZBTB21	O43364_Q9ULJ3	Homeodomain	zf-C2H2
HOXA2_SALL2	O43364_Q9Y467	Homeodomain	zf-C2H2
HOXA3_ZBTB39	O43365_O15060	Homeodomain	zf-C2H2
HOXA3_ZNF536	O43365_O15090	Homeodomain	zf-C2H2
HOXA3_ZNF292	O43365_O60281	Homeodomain	zf-C2H2
HOXA3_ZNF217	O43365_O75362	Homeodomain	zf-C2H2
HOXA3_SP1	O43365_P08047	Homeodomain	zf-C2H2
HOXA3_HIVEP1	O43365_P15822	Homeodomain	zf-C2H2
HOXA3_YY1	O43365_P25490	Homeodomain	zf-C2H2
HOXA3_MECOM	O43365_Q03112	Homeodomain	zf-C2H2
HOXA3_ZFHX3	O43365_Q15911	Homeodomain	zf-C2H2
HOXA3_ZNF423	O43365_Q2M1K9	Homeodomain	zf-C2H2
HOXA3_ZNF362	O43365_Q5T0B9	Homeodomain	zf-C2H2
HOXA3_ZNF746	O43365_Q6NUN9	Homeodomain	zf-C2H2
HOXA3_ZFHX4	O43365_Q86UP3	Homeodomain	zf-C2H2
HOXA3_ZNF516	O43365_Q92618	Homeodomain	zf-C2H2
HOXA3_RREB1	O43365_Q92766	Homeodomain	zf-C2H2
HOXA3_ZNF521	O43365_Q96K83	Homeodomain	zf-C2H2
HOXA3_ZKSCAN3	O43365_Q9BRR0	Homeodomain	zf-C2H2
HOXA3_PRDM16	O43365_Q9HAZ2	Homeodomain	zf-C2H2
HOXA3_PRDM6	O43365_Q9NQX0	Homeodomain	zf-C2H2
HOXA3_SALL1	O43365_Q9NSC2	Homeodomain	zf-C2H2
HOXA3_ZBTB40	O43365_Q9NUA8	Homeodomain	zf-C2H2
HOXA3_ZNF629	O43365_Q9UEG4	Homeodomain	zf-C2H2
HOXA3_SALL2	O43365_Q9Y467	Homeodomain	zf-C2H2
TLX3_HIVEP1	O43711_P15822	Homeodomain	zf-C2H2
TLX3_ZFHX3	O43711_Q15911	Homeodomain	zf-C2H2
TLX3_ZFHX4	O43711_Q86UP3	Homeodomain	zf-C2H2
TLX3_ZNF512	O43711_Q96ME7	Homeodomain	zf-C2H2
TLX3_SALL1	O43711_Q9NSC2	Homeodomain	zf-C2H2
TLX3_ZNF281	O43711_Q9Y2X9	Homeodomain	zf-C2H2
TLX2_ZFHX3	O43763_Q15911	Homeodomain	zf-C2H2
TLX2_ZNF512	O43763_Q96ME7	Homeodomain	zf-C2H2
TLX2_ZNF281	O43763_Q9Y2X9	Homeodomain	zf-C2H2
DLX3_ZBTB39	O60479_O15060	Homeodomain	zf-C2H2
DLX3_ZNF536	O60479_O15090	Homeodomain	zf-C2H2
DLX3_ZNF292	O60479_O60281	Homeodomain	zf-C2H2
DLX3_ZEB2	O60479_O60315	Homeodomain	zf-C2H2
DLX3_ZNF217	O60479_O75362	Homeodomain	zf-C2H2
DLX3_HIVEP1	O60479_P15822	Homeodomain	zf-C2H2
DLX3_ZFHX3	O60479_Q15911	Homeodomain	zf-C2H2
DLX3_ZNF423	O60479_Q2M1K9	Homeodomain	zf-C2H2
DLX3_ZNF746	O60479_Q6NUN9	Homeodomain	zf-C2H2
DLX3_ZFHX4	O60479_Q86UP3	Homeodomain	zf-C2H2
DLX3_ZNF516	O60479_Q92618	Homeodomain	zf-C2H2
DLX3_RREB1	O60479_Q92766	Homeodomain	zf-C2H2
DLX3_ZNF521	O60479_Q96K83	Homeodomain	zf-C2H2
DLX3_BCL11A	O60479_Q9H165	Homeodomain	zf-C2H2
DLX3_PRDM16	O60479_Q9HAZ2	Homeodomain	zf-C2H2
DLX3_PRDM6	O60479_Q9NQX0	Homeodomain	zf-C2H2
DLX3_SALL1	O60479_Q9NSC2	Homeodomain	zf-C2H2
DLX3_ZBTB40	O60479_Q9NUA8	Homeodomain	zf-C2H2
DLX3_SALL2	O60479_Q9Y467	Homeodomain	zf-C2H2
PRDM1_ZFHX4	O75626_Q86UP3	zf-C2H2	Homeodomain
KLF8_POU2F1	O95600_P14859	zf-C2H2	Homeodomain
KLF8_HOXA5	O95600_P20719	zf-C2H2	Homeodomain
KLF8_ADNP	O95600_Q9H2P0	zf-C2H2	Homeodomain
KLF8_ZHX1	O95600_Q9UKY1	zf-C2H2	Homeodomain
KLF8_ZHX2	O95600_Q9Y6X8	zf-C2H2	Homeodomain
ONECUT2_ZNF536	O95948_O15090	Homeodomain	zf-C2H2
ONECUT2_ZBTB43	O95948_O43298	Homeodomain	zf-C2H2
ONECUT2_ZEB2	O95948_O60315	Homeodomain	zf-C2H2
ONECUT2_ZNF217	O95948_O75362	Homeodomain	zf-C2H2
ONECUT2_HIVEP1	O95948_P15822	Homeodomain	zf-C2H2
ONECUT2_ZNF423	O95948_Q2M1K9	Homeodomain	zf-C2H2
ONECUT2_ZFHX4	O95948_Q86UP3	Homeodomain	zf-C2H2
ONECUT2_ZBTB34	O95948_Q8NCN2	Homeodomain	zf-C2H2
ONECUT2_ZNF507	O95948_Q8TCN5	Homeodomain	zf-C2H2
ONECUT2_ZNF516	O95948_Q92618	Homeodomain	zf-C2H2
ONECUT2_RREB1	O95948_Q92766	Homeodomain	zf-C2H2
ONECUT2_ZNF521	O95948_Q96K83	Homeodomain	zf-C2H2
ONECUT2_PRDM16	O95948_Q9HAZ2	Homeodomain	zf-C2H2
ONECUT2_PRDM6	O95948_Q9NQX0	Homeodomain	zf-C2H2
ONECUT2_SALL1	O95948_Q9NSC2	Homeodomain	zf-C2H2
ONECUT2_ZBTB40	O95948_Q9NUA8	Homeodomain	zf-C2H2
ONECUT2_SALL2	O95948_Q9Y467	Homeodomain	zf-C2H2
GLI3_ZFHX3	P10071_Q15911	zf-C2H2	Homeodomain
GLI3_ZFHX4	P10071_Q86UP3	zf-C2H2	Homeodomain
EGR2_ZFHX3	P11161_Q15911	zf-C2H2	Homeodomain
EGR2_ZFHX4	P11161_Q86UP3	zf-C2H2	Homeodomain
EGR2_ISL2	P11161_Q96A47	zf-C2H2	Homeodomain
EGR2_SIX4	P11161_Q9UIU6	zf-C2H2	Homeodomain
HOXB2_ZNF536	P14652_O15090	Homeodomain	zf-C2H2
HOXB2_ZNF292	P14652_O60281	Homeodomain	zf-C2H2
HOXB2_ZEB2	P14652_O60315	Homeodomain	zf-C2H2
HOXB2_HIVEP1	P14652_P15822	Homeodomain	zf-C2H2
HOXB2_YY1	P14652_P25490	Homeodomain	zf-C2H2
HOXB2_PRDM2	P14652_Q13029	Homeodomain	zf-C2H2
HOXB2_RLF	P14652_Q13129	Homeodomain	zf-C2H2
HOXB2_ZFHX3	P14652_Q15911	Homeodomain	zf-C2H2
HOXB2_ZNF423	P14652_Q2M1K9	Homeodomain	zf-C2H2
HOXB2_ZNF362	P14652_Q5T0B9	Homeodomain	zf-C2H2
HOXB2_ZFHX4	P14652_Q86UP3	Homeodomain	zf-C2H2
HOXB2_RREB1	P14652_Q92766	Homeodomain	zf-C2H2
HOXB2_ZNF521	P14652_Q96K83	Homeodomain	zf-C2H2
HOXB2_BCL11A	P14652_Q9H165	Homeodomain	zf-C2H2
HOXB2_SALL1	P14652_Q9NSC2	Homeodomain	zf-C2H2
HOXB2_ZBTB40	P14652_Q9NUA8	Homeodomain	zf-C2H2
HOXB2_SALL2	P14652_Q9Y467	Homeodomain	zf-C2H2
POU2F1_ZNF536	P14859_O15090	Homeodomain	zf-C2H2
POU2F1_ZNF292	P14859_O60281	Homeodomain	zf-C2H2
POU2F1_SP1	P14859_P08047	Homeodomain	zf-C2H2
POU2F1_HIVEP1	P14859_P15822	Homeodomain	zf-C2H2
POU2F1_ZEB1	P14859_P37275	Homeodomain	zf-C2H2
POU2F1_ZNF143	P14859_P52747	Homeodomain	zf-C2H2
POU2F1_KLF3	P14859_P57682	Homeodomain	zf-C2H2
POU2F1_SP2	P14859_Q02086	Homeodomain	zf-C2H2
POU2F1_PRDM2	P14859_Q13029	Homeodomain	zf-C2H2
POU2F1_ZFHX3	P14859_Q15911	Homeodomain	zf-C2H2
POU2F1_ZNF362	P14859_Q5T0B9	Homeodomain	zf-C2H2
POU2F1_ZFHX4	P14859_Q86UP3	Homeodomain	zf-C2H2
POU2F1_ZNF384	P14859_Q8TF68	Homeodomain	zf-C2H2
POU2F1_ZNF516	P14859_Q92618	Homeodomain	zf-C2H2
POU2F1_RREB1	P14859_Q92766	Homeodomain	zf-C2H2
POU2F1_SALL1	P14859_Q9NSC2	Homeodomain	zf-C2H2
POU2F1_ZBTB40	P14859_Q9NUA8	Homeodomain	zf-C2H2
POU2F1_ZNF148	P14859_Q9UQR1	Homeodomain	zf-C2H2
POU2F1_ZNF281	P14859_Q9Y2X9	Homeodomain	zf-C2H2
POU2F1_SALL2	P14859_Q9Y467	Homeodomain	zf-C2H2
POU2F1_KLF12	P14859_Q9Y4X4	Homeodomain	zf-C2H2
HOXA5_ZNF195	P20719_O14628	Homeodomain	zf-C2H2
HOXA5_ZNF536	P20719_O15090	Homeodomain	zf-C2H2
HOXA5_ZEB2	P20719_O60315	Homeodomain	zf-C2H2
HOXA5_ZNF780A	P20719_O75290	Homeodomain	zf-C2H2
HOXA5_ZNF217	P20719_O75362	Homeodomain	zf-C2H2
HOXA5_ZBTB7A	P20719_O95365	Homeodomain	zf-C2H2
HOXA5_SP1	P20719_P08047	Homeodomain	zf-C2H2
HOXA5_HIVEP1	P20719_P15822	Homeodomain	zf-C2H2
HOXA5_ZNF12	P20719_P17014	Homeodomain	zf-C2H2
HOXA5_ZNF24	P20719_P17028	Homeodomain	zf-C2H2
HOXA5_MAZ	P20719_P56270	Homeodomain	zf-C2H2
HOXA5_MECOM	P20719_Q03112	Homeodomain	zf-C2H2
HOXA5_RLF	P20719_Q13129	Homeodomain	zf-C2H2
HOXA5_ZNF460	P20719_Q14592	Homeodomain	zf-C2H2
HOXA5_ZFHX3	P20719_Q15911	Homeodomain	zf-C2H2
HOXA5_ZNF423	P20719_Q2M1K9	Homeodomain	zf-C2H2
HOXA5_ZNF362	P20719_Q5T0B9	Homeodomain	zf-C2H2
HOXA5_ZNF746	P20719_Q6NUN9	Homeodomain	zf-C2H2
HOXA5_ZFHX4	P20719_Q86UP3	Homeodomain	zf-C2H2
HOXA5_ZNF687	P20719_Q8N1G0	Homeodomain	zf-C2H2
HOXA5_ZNF516	P20719_Q92618	Homeodomain	zf-C2H2
HOXA5_RREB1	P20719_Q92766	Homeodomain	zf-C2H2
HOXA5_ZNF521	P20719_Q96K83	Homeodomain	zf-C2H2
HOXA5_ZNF512	P20719_Q96ME7	Homeodomain	zf-C2H2
HOXA5_BCL11A	P20719_Q9H165	Homeodomain	zf-C2H2
HOXA5_SALL1	P20719_Q9NSC2	Homeodomain	zf-C2H2
HOXA5_ZBTB40	P20719_Q9NUA8	Homeodomain	zf-C2H2
HOXA5_ZNF629	P20719_Q9UEG4	Homeodomain	zf-C2H2
PAX7_ZNF217	P23759_O75362	Homeodomain	zf-C2H2
PAX7_HIVEP1	P23759_P15822	Homeodomain	zf-C2H2
PAX7_ZNF24	P23759_P17028	Homeodomain	zf-C2H2
PAX7_ZEB1	P23759_P37275	Homeodomain	zf-C2H2
PAX7_ZFHX3	P23759_Q15911	Homeodomain	zf-C2H2
PAX7_ZNF746	P23759_Q6NUN9	Homeodomain	zf-C2H2
PAX7_ZFHX4	P23759_Q86UP3	Homeodomain	zf-C2H2
PAX7_RREB1	P23759_Q92766	Homeodomain	zf-C2H2
PAX7_ZKSCAN4	P23759_Q969J2	Homeodomain	zf-C2H2
PAX7_IKZF3	P23759_Q9UKT9	Homeodomain	zf-C2H2
PAX7_ZNF281	P23759_Q9Y2X9	Homeodomain	zf-C2H2
PAX7_ZSCAN21	P23759_Q9Y5A6	Homeodomain	zf-C2H2
YY1_ADNP	P25490_Q9H2P0	zf-C2H2	Homeodomain
YY1_ZHX3	P25490_Q9H4I2	zf-C2H2	Homeodomain
YY1_ZHX1	P25490_Q9UKY1	zf-C2H2	Homeodomain
YY1_ZHX2	P25490_Q9Y6X8	zf-C2H2	Homeodomain
PAX6_ZNF536	P26367_O15090	Homeodomain	zf-C2H2
PAX6_ZEB2	P26367_O60315	Homeodomain	zf-C2H2
PAX6_HIVEP1	P26367_P15822	Homeodomain	zf-C2H2
PAX6_YY1	P26367_P25490	Homeodomain	zf-C2H2
PAX6_ZEB1	P26367_P37275	Homeodomain	zf-C2H2
PAX6_CTCF	P26367_P49711	Homeodomain	zf-C2H2
PAX6_ZNF121	P26367_P58317	Homeodomain	zf-C2H2
PAX6_RLF	P26367_Q13129	Homeodomain	zf-C2H2
PAX6_ZFHX3	P26367_Q15911	Homeodomain	zf-C2H2
PAX6_ZNF746	P26367_Q6NUN9	Homeodomain	zf-C2H2
PAX6_ZFHX4	P26367_Q86UP3	Homeodomain	zf-C2H2
PAX6_ZNF516	P26367_Q92618	Homeodomain	zf-C2H2
PAX6_RREB1	P26367_Q92766	Homeodomain	zf-C2H2
PAX6_ZKSCAN4	P26367_Q969J2	Homeodomain	zf-C2H2
PAX6_ZNF521	P26367_Q96K83	Homeodomain	zf-C2H2
PAX6_ZNF512	P26367_Q96ME7	Homeodomain	zf-C2H2
PAX6_ZNF607	P26367_Q96SK3	Homeodomain	zf-C2H2
PAX6_SALL1	P26367_Q9NSC2	Homeodomain	zf-C2H2
PAX6_IKZF3	P26367_Q9UKT9	Homeodomain	zf-C2H2
PAX6_ZNF148	P26367_Q9UQR1	Homeodomain	zf-C2H2
PAX6_ZNF281	P26367_Q9Y2X9	Homeodomain	zf-C2H2
HOXA10_ZBTB39	P31260_O15060	Homeodomain	zf-C2H2
HOXA10_ZNF536	P31260_O15090	Homeodomain	zf-C2H2
HOXA10_ZNF780A	P31260_O75290	Homeodomain	zf-C2H2
HOXA10_SP1	P31260_P08047	Homeodomain	zf-C2H2
HOXA10_HIVEP1	P31260_P15822	Homeodomain	zf-C2H2
HOXA10_ZNF24	P31260_P17028	Homeodomain	zf-C2H2
HOXA10_ZNF8	P31260_P17098	Homeodomain	zf-C2H2
HOXA10_YY1	P31260_P25490	Homeodomain	zf-C2H2
HOXA10_MAZ	P31260_P56270	Homeodomain	zf-C2H2
HOXA10_MECOM	P31260_Q03112	Homeodomain	zf-C2H2
HOXA10_VEZF1	P31260_Q14119	Homeodomain	zf-C2H2
HOXA10_ZNF146	P31260_Q15072	Homeodomain	zf-C2H2
HOXA10_ZFHX3	P31260_Q15911	Homeodomain	zf-C2H2
HOXA10_ZNF423	P31260_Q2M1K9	Homeodomain	zf-C2H2
HOXA10_ZFHX4	P31260_Q86UP3	Homeodomain	zf-C2H2
HOXA10_ZNF516	P31260_Q92618	Homeodomain	zf-C2H2
HOXA10_RREB1	P31260_Q92766	Homeodomain	zf-C2H2
HOXA10_ZNF521	P31260_Q96K83	Homeodomain	zf-C2H2
HOXA10_BCL11B	P31260_Q9C0K0	Homeodomain	zf-C2H2
HOXA10_BCL11A	P31260_Q9H165	Homeodomain	zf-C2H2
HOXA10_PRDM16	P31260_Q9HAZ2	Homeodomain	zf-C2H2
HOXA10_SALL1	P31260_Q9NSC2	Homeodomain	zf-C2H2
HOXA10_ZBTB40	P31260_Q9NUA8	Homeodomain	zf-C2H2
HOXA10_ZNF226	P31260_Q9NYT6	Homeodomain	zf-C2H2
HOXA10_ZNF629	P31260_Q9UEG4	Homeodomain	zf-C2H2
HOXA10_SALL2	P31260_Q9Y467	Homeodomain	zf-C2H2
HOXA9_ZNF536	P31269_O15090	Homeodomain	zf-C2H2
HOXA9_ZEB2	P31269_O60315	Homeodomain	zf-C2H2
HOXA9_ZNF217	P31269_O75362	Homeodomain	zf-C2H2
HOXA9_HIVEP1	P31269_P15822	Homeodomain	zf-C2H2
HOXA9_ZNF12	P31269_P17014	Homeodomain	zf-C2H2
HOXA9_ZKSCAN1	P31269_P17029	Homeodomain	zf-C2H2
HOXA9_INSM1	P31269_Q01101	Homeodomain	zf-C2H2
HOXA9_ZFHX3	P31269_Q15911	Homeodomain	zf-C2H2
HOXA9_ZNF423	P31269_Q2M1K9	Homeodomain	zf-C2H2
HOXA9_ZNF362	P31269_Q5T0B9	Homeodomain	zf-C2H2
HOXA9_ZFHX4	P31269_Q86UP3	Homeodomain	zf-C2H2
HOXA9_ZFP82	P31269_Q8N141	Homeodomain	zf-C2H2
HOXA9_RREB1	P31269_Q92766	Homeodomain	zf-C2H2
HOXA9_ZNF521	P31269_Q96K83	Homeodomain	zf-C2H2
HOXA9_BCL11A	P31269_Q9H165	Homeodomain	zf-C2H2
HOXA9_PRDM6	P31269_Q9NQX0	Homeodomain	zf-C2H2
HOXA9_SALL1	P31269_Q9NSC2	Homeodomain	zf-C2H2
HOXA9_ZBTB40	P31269_Q9NUA8	Homeodomain	zf-C2H2
HOXA9_ZNF629	P31269_Q9UEG4	Homeodomain	zf-C2H2
HOXA9_IKZF3	P31269_Q9UKT9	Homeodomain	zf-C2H2
HOXA9_SALL2	P31269_Q9Y467	Homeodomain	zf-C2H2
HOXA11_ZNF536	P31270_O15090	Homeodomain	zf-C2H2
HOXA11_INSM1	P31270_Q01101	Homeodomain	zf-C2H2
HOXA11_ZFHX4	P31270_Q86UP3	Homeodomain	zf-C2H2
HOXA11_RREB1	P31270_Q92766	Homeodomain	zf-C2H2
HOXA11_ZNF521	P31270_Q96K83	Homeodomain	zf-C2H2
HOXA11_SALL1	P31270_Q9NSC2	Homeodomain	zf-C2H2
HOXA11_ZNF629	P31270_Q9UEG4	Homeodomain	zf-C2H2
HOXA11_SALL2	P31270_Q9Y467	Homeodomain	zf-C2H2
TLX1_ZNF536	P31314_O15090	Homeodomain	zf-C2H2
TLX1_ZEB2	P31314_O60315	Homeodomain	zf-C2H2
TLX1_ZNF217	P31314_O75362	Homeodomain	zf-C2H2
TLX1_HIVEP1	P31314_P15822	Homeodomain	zf-C2H2
TLX1_ZFHX3	P31314_Q15911	Homeodomain	zf-C2H2
TLX1_ZNF260	P31314_Q3ZCT1	Homeodomain	zf-C2H2
TLX1_ZFHX4	P31314_Q86UP3	Homeodomain	zf-C2H2
TLX1_ZNF516	P31314_Q92618	Homeodomain	zf-C2H2
TLX1_RREB1	P31314_Q92766	Homeodomain	zf-C2H2
TLX1_ZKSCAN4	P31314_Q969J2	Homeodomain	zf-C2H2
TLX1_SALL1	P31314_Q9NSC2	Homeodomain	zf-C2H2
TLX1_ZNF281	P31314_Q9Y2X9	Homeodomain	zf-C2H2
TLX1_ZSCAN21	P31314_Q9Y5A6	Homeodomain	zf-C2H2
OTX1_ZNF536	P32242_O15090	Homeodomain	zf-C2H2
OTX1_ZNF217	P32242_O75362	Homeodomain	zf-C2H2
OTX1_HIVEP1	P32242_P15822	Homeodomain	zf-C2H2
OTX1_ZFHX3	P32242_Q15911	Homeodomain	zf-C2H2
OTX1_ZFHX4	P32242_Q86UP3	Homeodomain	zf-C2H2
OTX1_ZNF148	P32242_Q9UQR1	Homeodomain	zf-C2H2
OTX2_ZNF536	P32243_O15090	Homeodomain	zf-C2H2
OTX2_ZEB2	P32243_O60315	Homeodomain	zf-C2H2
OTX2_ZNF217	P32243_O75362	Homeodomain	zf-C2H2
OTX2_HIVEP1	P32243_P15822	Homeodomain	zf-C2H2
OTX2_MECOM	P32243_Q03112	Homeodomain	zf-C2H2
OTX2_ZFHX3	P32243_Q15911	Homeodomain	zf-C2H2
OTX2_ZNF746	P32243_Q6NUN9	Homeodomain	zf-C2H2
OTX2_ZFHX4	P32243_Q86UP3	Homeodomain	zf-C2H2
OTX2_ZNF516	P32243_Q92618	Homeodomain	zf-C2H2
OTX2_RREB1	P32243_Q92766	Homeodomain	zf-C2H2
OTX2_ZNF521	P32243_Q96K83	Homeodomain	zf-C2H2
OTX2_BCL11A	P32243_Q9H165	Homeodomain	zf-C2H2
OTX2_SALL1	P32243_Q9NSC2	Homeodomain	zf-C2H2
OTX2_IKZF3	P32243_Q9UKT9	Homeodomain	zf-C2H2
HOXD12_ZNF536	P35452_O15090	Homeodomain	zf-C2H2
HOXD12_ZEB2	P35452_O60315	Homeodomain	zf-C2H2
HOXD12_ZNF217	P35452_O75362	Homeodomain	zf-C2H2
HOXD12_HIVEP1	P35452_P15822	Homeodomain	zf-C2H2
HOXD12_YY1	P35452_P25490	Homeodomain	zf-C2H2
HOXD12_ZFHX4	P35452_Q86UP3	Homeodomain	zf-C2H2
HOXD12_ZNF507	P35452_Q8TCN5	Homeodomain	zf-C2H2
HOXD12_ZNF592	P35452_Q92610	Homeodomain	zf-C2H2
HOXD12_RREB1	P35452_Q92766	Homeodomain	zf-C2H2
HOXD12_ZNF521	P35452_Q96K83	Homeodomain	zf-C2H2
HOXD12_BCL11A	P35452_Q9H165	Homeodomain	zf-C2H2
HOXD12_ZBTB3	P35452_Q9H5J0	Homeodomain	zf-C2H2
HOXD12_PRDM16	P35452_Q9HAZ2	Homeodomain	zf-C2H2
HOXD12_SALL1	P35452_Q9NSC2	Homeodomain	zf-C2H2
HOXD12_ZNF281	P35452_Q9Y2X9	Homeodomain	zf-C2H2
HOXD12_ZNF711	P35452_Q9Y462	Homeodomain	zf-C2H2
HOXD12_SALL2	P35452_Q9Y467	Homeodomain	zf-C2H2
LHX1_ZNF724	P48742_A8MTY0	Homeodomain	zf-C2H2
LHX1_HIVEP1	P48742_P15822	Homeodomain	zf-C2H2
LHX1_CTCF	P48742_P49711	Homeodomain	zf-C2H2
LHX1_ZNF146	P48742_Q15072	Homeodomain	zf-C2H2
LHX1_ZFHX4	P48742_Q86UP3	Homeodomain	zf-C2H2
LHX1_ZKSCAN4	P48742_Q969J2	Homeodomain	zf-C2H2
LHX1_ZNF512	P48742_Q96ME7	Homeodomain	zf-C2H2
LHX1_ZSCAN21	P48742_Q9Y5A6	Homeodomain	zf-C2H2
HOXA1_ZNF536	P49639_O15090	Homeodomain	zf-C2H2
HOXA1_ZNF217	P49639_O75362	Homeodomain	zf-C2H2
HOXA1_HIVEP1	P49639_P15822	Homeodomain	zf-C2H2
HOXA1_ZNF516	P49639_Q92618	Homeodomain	zf-C2H2
HOXA1_ZNF521	P49639_Q96K83	Homeodomain	zf-C2H2
HOXA1_ZKSCAN3	P49639_Q9BRR0	Homeodomain	zf-C2H2
HOXA1_BCL11A	P49639_Q9H165	Homeodomain	zf-C2H2
HOXA1_SALL2	P49639_Q9Y467	Homeodomain	zf-C2H2
LHX2_ZNF724	P50458_A8MTY0	Homeodomain	zf-C2H2
LHX2_ZNF536	P50458_O15090	Homeodomain	zf-C2H2
LHX2_ZEB2	P50458_O60315	Homeodomain	zf-C2H2
LHX2_HIVEP1	P50458_P15822	Homeodomain	zf-C2H2
LHX2_YY1	P50458_P25490	Homeodomain	zf-C2H2
LHX2_CTCF	P50458_P49711	Homeodomain	zf-C2H2
LHX2_ZFHX3	P50458_Q15911	Homeodomain	zf-C2H2
LHX2_ZFHX4	P50458_Q86UP3	Homeodomain	zf-C2H2
LHX2_ZNF687	P50458_Q8N1G0	Homeodomain	zf-C2H2
LHX2_RREB1	P50458_Q92766	Homeodomain	zf-C2H2
LHX2_ZNF512	P50458_Q96ME7	Homeodomain	zf-C2H2
PDX1_ZNF724	P52945_A8MTY0	Homeodomain	zf-C2H2
PDX1_ZNF536	P52945_O15090	Homeodomain	zf-C2H2
PDX1_ZNF292	P52945_O60281	Homeodomain	zf-C2H2
PDX1_ZNF780A	P52945_O75290	Homeodomain	zf-C2H2
PDX1_ZNF217	P52945_O75362	Homeodomain	zf-C2H2
PDX1_ZBTB7A	P52945_O95365	Homeodomain	zf-C2H2
PDX1_HIVEP1	P52945_P15822	Homeodomain	zf-C2H2
PDX1_ZNF24	P52945_P17028	Homeodomain	zf-C2H2
PDX1_YY1	P52945_P25490	Homeodomain	zf-C2H2
PDX1_ZNF460	P52945_Q14592	Homeodomain	zf-C2H2
PDX1_ZFHX3	P52945_Q15911	Homeodomain	zf-C2H2
PDX1_ZNF746	P52945_Q6NUN9	Homeodomain	zf-C2H2
PDX1_ZFHX4	P52945_Q86UP3	Homeodomain	zf-C2H2
PDX1_ZFP82	P52945_Q8N141	Homeodomain	zf-C2H2
PDX1_ZNF516	P52945_Q92618	Homeodomain	zf-C2H2
PDX1_RREB1	P52945_Q92766	Homeodomain	zf-C2H2
PDX1_ZNF521	P52945_Q96K83	Homeodomain	zf-C2H2
PDX1_BCL11A	P52945_Q9H165	Homeodomain	zf-C2H2
PDX1_PRDM16	P52945_Q9HAZ2	Homeodomain	zf-C2H2
PDX1_PRDM6	P52945_Q9NQX0	Homeodomain	zf-C2H2
PDX1_SALL1	P52945_Q9NSC2	Homeodomain	zf-C2H2
PDX1_ZBTB40	P52945_Q9NUA8	Homeodomain	zf-C2H2
PDX1_ZNF226	P52945_Q9NYT6	Homeodomain	zf-C2H2
PDX1_ZNF629	P52945_Q9UEG4	Homeodomain	zf-C2H2
PDX1_ZBTB21	P52945_Q9ULJ3	Homeodomain	zf-C2H2
PDX1_SALL2	P52945_Q9Y467	Homeodomain	zf-C2H2
PDX1_ZSCAN21	P52945_Q9Y5A6	Homeodomain	zf-C2H2
GSC_ZNF536	P56915_O15090	Homeodomain	zf-C2H2
GSC_ZEB2	P56915_O60315	Homeodomain	zf-C2H2
GSC_HIVEP1	P56915_P15822	Homeodomain	zf-C2H2
GSC_MECOM	P56915_Q03112	Homeodomain	zf-C2H2
GSC_ZFHX3	P56915_Q15911	Homeodomain	zf-C2H2
GSC_ZFHX4	P56915_Q86UP3	Homeodomain	zf-C2H2
GSC_ZNF516	P56915_Q92618	Homeodomain	zf-C2H2
GSC_RREB1	P56915_Q92766	Homeodomain	zf-C2H2
GSC_ZNF521	P56915_Q96K83	Homeodomain	zf-C2H2
GSC_BCL11A	P56915_Q9H165	Homeodomain	zf-C2H2
GSC_PRDM16	P56915_Q9HAZ2	Homeodomain	zf-C2H2
GSC_PRDM6	P56915_Q9NQX0	Homeodomain	zf-C2H2
GSC_SALL1	P56915_Q9NSC2	Homeodomain	zf-C2H2
KLF3_ZFHX3	P57682_Q15911	zf-C2H2	Homeodomain
KLF3_ZFHX4	P57682_Q86UP3	zf-C2H2	Homeodomain
KLF3_ZHX3	P57682_Q9H4I2	zf-C2H2	Homeodomain
KLF3_SIX4	P57682_Q9UIU6	zf-C2H2	Homeodomain
KLF3_ZHX1	P57682_Q9UKY1	zf-C2H2	Homeodomain
KLF3_SATB2	P57682_Q9UPW6	zf-C2H2	Homeodomain
KLF3_ZHX2	P57682_Q9Y6X8	zf-C2H2	Homeodomain
PITX1_ZNF536	P78337_O15090	Homeodomain	zf-C2H2
PITX1_HIVEP1	P78337_P15822	Homeodomain	zf-C2H2
PITX1_ZFHX3	P78337_Q15911	Homeodomain	zf-C2H2
PITX1_ZFHX4	P78337_Q86UP3	Homeodomain	zf-C2H2
PITX1_RREB1	P78337_Q92766	Homeodomain	zf-C2H2
HOXA4_ZNF724	Q00056_A8MTY0	Homeodomain	zf-C2H2
HOXA4_ZNF536	Q00056_O15090	Homeodomain	zf-C2H2
HOXA4_RREB1	Q00056_Q92766	Homeodomain	zf-C2H2
HOXA4_SALL1	Q00056_Q9NSC2	Homeodomain	zf-C2H2
HOXA4_ZNF629	Q00056_Q9UEG4	Homeodomain	zf-C2H2
SATB1_ZNF536	Q01826_O15090	Homeodomain	zf-C2H2
SATB1_ZEB2	Q01826_O60315	Homeodomain	zf-C2H2
SATB1_ZFHX3	Q01826_Q15911	Homeodomain	zf-C2H2
SATB1_ZNF423	Q01826_Q2M1K9	Homeodomain	zf-C2H2
SATB1_ZNF362	Q01826_Q5T0B9	Homeodomain	zf-C2H2
SATB1_ZFHX4	Q01826_Q86UP3	Homeodomain	zf-C2H2
SATB1_ZNF521	Q01826_Q96K83	Homeodomain	zf-C2H2
SATB1_BCL11A	Q01826_Q9H165	Homeodomain	zf-C2H2
SATB1_PRDM16	Q01826_Q9HAZ2	Homeodomain	zf-C2H2
SATB1_SALL1	Q01826_Q9NSC2	Homeodomain	zf-C2H2
SATB1_SALL2	Q01826_Q9Y467	Homeodomain	zf-C2H2
POU5F1_ZNF536	Q01860_O15090	Homeodomain	zf-C2H2
POU5F1_ZEB2	Q01860_O60315	Homeodomain	zf-C2H2
POU5F1_HIVEP1	Q01860_P15822	Homeodomain	zf-C2H2
POU5F1_ZFHX4	Q01860_Q86UP3	Homeodomain	zf-C2H2
POU5F1_RREB1	Q01860_Q92766	Homeodomain	zf-C2H2
POU5F1_ZNF521	Q01860_Q96K83	Homeodomain	zf-C2H2
POU5F1_BCL11A	Q01860_Q9H165	Homeodomain	zf-C2H2
POU5F1_PRDM6	Q01860_Q9NQX0	Homeodomain	zf-C2H2
POU5F1_SALL1	Q01860_Q9NSC2	Homeodomain	zf-C2H2
POU5F1_ZBTB40	Q01860_Q9NUA8	Homeodomain	zf-C2H2
POU5F1_SALL2	Q01860_Q9Y467	Homeodomain	zf-C2H2
KLF5_ZHX2	Q13887_Q9Y6X8	zf-C2H2	Homeodomain
ISX_ZFHX4	Q2M1V0_Q86UP3	Homeodomain	zf-C2H2
SIX5_ZNF536	Q8N196_O15090	Homeodomain	zf-C2H2
SIX5_SP1	Q8N196_P08047	Homeodomain	zf-C2H2
SIX5_SALL1	Q8N196_Q9NSC2	Homeodomain	zf-C2H2
SIX5_SALL2	Q8N196_Q9Y467	Homeodomain	zf-C2H2
SP7_POU2F1	Q8TDD2_P14859	zf-C2H2	Homeodomain
SP7_HOXA10	Q8TDD2_P31260	zf-C2H2	Homeodomain
SP7_CUX1	Q8TDD2_P39880	zf-C2H2	Homeodomain
SP7_PBX1	Q8TDD2_P40424	zf-C2H2	Homeodomain
SP7_PBX2	Q8TDD2_P40425	zf-C2H2	Homeodomain
SP7_MNX1	Q8TDD2_P50219	zf-C2H2	Homeodomain
SP7_DLX6	Q8TDD2_P56179	zf-C2H2	Homeodomain
SP7_PITX1	Q8TDD2_P78337	zf-C2H2	Homeodomain
SP7_SATB1	Q8TDD2_Q01826	zf-C2H2	Homeodomain
SP7_ZFHX4	Q8TDD2_Q86UP3	zf-C2H2	Homeodomain
SP7_ISL2	Q8TDD2_Q96A47	zf-C2H2	Homeodomain
SP7_NKX2-4	Q8TDD2_Q9H2Z4	zf-C2H2	Homeodomain
SP7_SIX4	Q8TDD2_Q9UIU6	zf-C2H2	Homeodomain
SP7_SATB2	Q8TDD2_Q9UPW6	zf-C2H2	Homeodomain
LHX4_HIVEP1	Q969G2_P15822	Homeodomain	zf-C2H2
LHX4_YY1	Q969G2_P25490	Homeodomain	zf-C2H2
LHX4_ZNF687	Q969G2_Q8N1G0	Homeodomain	zf-C2H2
PITX2_HIVEP1	Q99697_P15822	Homeodomain	zf-C2H2
PITX2_ZFHX3	Q99697_Q15911	Homeodomain	zf-C2H2
PITX2_ZFHX4	Q99697_Q86UP3	Homeodomain	zf-C2H2
PITX2_ZNF521	Q99697_Q96K83	Homeodomain	zf-C2H2
KLF16_POU2F1	Q9BXK1_P14859	zf-C2H2	Homeodomain
KLF16_PITX1	Q9BXK1_P78337	zf-C2H2	Homeodomain
KLF16_ZHX1	Q9BXK1_Q9UKY1	zf-C2H2	Homeodomain
KLF16_ZHX2	Q9BXK1_Q9Y6X8	zf-C2H2	Homeodomain
PBX4_ZNF536	Q9BYU1_O15090	Homeodomain	zf-C2H2
PBX4_HIVEP1	Q9BYU1_P15822	Homeodomain	zf-C2H2
PBX4_SP2	Q9BYU1_Q02086	Homeodomain	zf-C2H2
PBX4_SALL1	Q9BYU1_Q9NSC2	Homeodomain	zf-C2H2
ALX4_ZFHX4	Q9H161_Q86UP3	Homeodomain	zf-C2H2
ALX4_RREB1	Q9H161_Q92766	Homeodomain	zf-C2H2
ALX4_SALL1	Q9H161_Q9NSC2	Homeodomain	zf-C2H2
VSX1_ZEB2	Q9NZR4_O60315	Homeodomain	zf-C2H2
VSX1_RLF	Q9NZR4_Q13129	Homeodomain	zf-C2H2
VSX1_ZFHX3	Q9NZR4_Q15911	Homeodomain	zf-C2H2
VSX1_ZFHX4	Q9NZR4_Q86UP3	Homeodomain	zf-C2H2
VSX1_ZNF516	Q9NZR4_Q92618	Homeodomain	zf-C2H2
VSX1_RREB1	Q9NZR4_Q92766	Homeodomain	zf-C2H2
VSX1_ZKSCAN4	Q9NZR4_Q969J2	Homeodomain	zf-C2H2
LHX3_ZEB2	Q9UBR4_O60315	Homeodomain	zf-C2H2
LHX3_HIVEP1	Q9UBR4_P15822	Homeodomain	zf-C2H2
LHX3_YY1	Q9UBR4_P25490	Homeodomain	zf-C2H2
LHX3_ZFHX4	Q9UBR4_Q86UP3	Homeodomain	zf-C2H2
LHX3_ZNF512	Q9UBR4_Q96ME7	Homeodomain	zf-C2H2
LHX3_SALL1	Q9UBR4_Q9NSC2	Homeodomain	zf-C2H2
DUX4_ZSCAN5C	Q9UBX2_A6NGD5	Homeodomain	zf-C2H2
DUX4_ZNF217	Q9UBX2_O75362	Homeodomain	zf-C2H2
DUX4_ZSCAN5DP	Q9UBX2_P0CG00	Homeodomain	zf-C2H2
DUX4_ZNF687	Q9UBX2_Q8N1G0	Homeodomain	zf-C2H2
KLF15_ZHX1	Q9UIH9_Q9UKY1	zf-C2H2	Homeodomain
LHX6_ZNF536	Q9UPM6_O15090	Homeodomain	zf-C2H2
LHX6_HIVEP1	Q9UPM6_P15822	Homeodomain	zf-C2H2
LHX6_ZEB1	Q9UPM6_P37275	Homeodomain	zf-C2H2
LHX6_ZNF516	Q9UPM6_Q92618	Homeodomain	zf-C2H2
LHX6_ZSCAN21	Q9UPM6_Q9Y5A6	Homeodomain	zf-C2H2
SATB2_ZEB2	Q9UPW6_O60315	Homeodomain	zf-C2H2
SATB2_SP1	Q9UPW6_P08047	Homeodomain	zf-C2H2
SATB2_ZEB1	Q9UPW6_P37275	Homeodomain	zf-C2H2
SATB2_MECOM	Q9UPW6_Q03112	Homeodomain	zf-C2H2
SATB2_ZNF460	Q9UPW6_Q14592	Homeodomain	zf-C2H2
SATB2_ZFHX3	Q9UPW6_Q15911	Homeodomain	zf-C2H2
SATB2_ZNF746	Q9UPW6_Q6NUN9	Homeodomain	zf-C2H2
SATB2_ZFHX4	Q9UPW6_Q86UP3	Homeodomain	zf-C2H2
SATB2_ZNF516	Q9UPW6_Q92618	Homeodomain	zf-C2H2
SATB2_RREB1	Q9UPW6_Q92766	Homeodomain	zf-C2H2
SATB2_ZBTB40	Q9UPW6_Q9NUA8	Homeodomain	zf-C2H2
SATB2_SALL2	Q9UPW6_Q9Y467	Homeodomain	zf-C2H2
KLF12_ZHX3	Q9Y4X4_Q9H4I2	zf-C2H2	Homeodomain
KLF12_ZHX1	Q9Y4X4_Q9UKY1	zf-C2H2	Homeodomain
KLF12_ZHX2	Q9Y4X4_Q9Y6X8	zf-C2H2	Homeodomain
ZHX2_ZNF362	Q9Y6X8_Q5T0B9	Homeodomain	zf-C2H2
ZHX2_SALL1	Q9Y6X8_Q9NSC2	Homeodomain	zf-C2H2
HOXA9_RFX2	P31269_P48378	Homeodomain	RFX_DNA_binding
LEUTX_ARID2	A8MZ59_Q68CP9	Homeodomain	RFX_DNA_binding
CRX_ARID2	O43186_Q68CP9	Homeodomain	RFX_DNA_binding
HOXA2_RFX5	O43364_P48382	Homeodomain	RFX_DNA_binding
TLX3_ARID2	O43711_Q68CP9	Homeodomain	RFX_DNA_binding
DLX3_RFX2	O60479_P48378	Homeodomain	RFX_DNA_binding
DLX3_ARID2	O60479_Q68CP9	Homeodomain	RFX_DNA_binding
ONECUT2_RFX2	O95948_P48378	Homeodomain	RFX_DNA_binding
HOXB2_RFX5	P14652_P48382	Homeodomain	RFX_DNA_binding
HOXB2_RFX7	P14652_Q2KHR2	Homeodomain	RFX_DNA_binding
HOXB2_ARID2	P14652_Q68CP9	Homeodomain	RFX_DNA_binding
POU2F1_RFX5	P14859_P48382	Homeodomain	RFX_DNA_binding
POU2F1_RFX7	P14859_Q2KHR2	Homeodomain	RFX_DNA_binding
POU2F1_ARID2	P14859_Q68CP9	Homeodomain	RFX_DNA_binding
HOXA5_RFX2	P20719_P48378	Homeodomain	RFX_DNA_binding
HOXA5_RFX5	P20719_P48382	Homeodomain	RFX_DNA_binding
RFX1_PBX2	P22670_P40425	RFX_DNA_binding	Homeodomain
RFX1_NKX2-4	P22670_Q9H2Z4	RFX_DNA_binding	Homeodomain
RFX1_SIX4	P22670_Q9UIU6	RFX_DNA_binding	Homeodomain
PAX6_RFX5	P26367_P48382	Homeodomain	RFX_DNA_binding
PAX6_ARID2	P26367_Q68CP9	Homeodomain	RFX_DNA_binding
HOXA10_RFX2	P31260_P48378	Homeodomain	RFX_DNA_binding
HOXA10_RFX5	P31260_P48382	Homeodomain	RFX_DNA_binding
OTX2_ARID2	P32243_Q68CP9	Homeodomain	RFX_DNA_binding
HOXD12_RFX1	P35452_P22670	Homeodomain	RFX_DNA_binding
HOXD12_RFX5	P35452_P48382	Homeodomain	RFX_DNA_binding
HOXD12_RFX6	P35452_Q8HWS3	Homeodomain	RFX_DNA_binding
RFX2_ZFHX2	P48378_Q9C0A1	RFX_DNA_binding	Homeodomain
RFX2_SIX4	P48378_Q9UIU6	RFX_DNA_binding	Homeodomain
RFX3_PITX1	P48380_P78337	RFX_DNA_binding	Homeodomain
RFX3_SATB1	P48380_Q01826	RFX_DNA_binding	Homeodomain
RFX3_SIX5	P48380_Q8N196	RFX_DNA_binding	Homeodomain
RFX3_SIX4	P48380_Q9UIU6	RFX_DNA_binding	Homeodomain
RFX3_ZHX1	P48380_Q9UKY1	RFX_DNA_binding	Homeodomain
RFX3_SATB2	P48380_Q9UPW6	RFX_DNA_binding	Homeodomain
RFX5_MNX1	P48382_P50219	RFX_DNA_binding	Homeodomain
RFX5_SIX5	P48382_Q8N196	RFX_DNA_binding	Homeodomain
RFX5_SIX4	P48382_Q9UIU6	RFX_DNA_binding	Homeodomain
LHX1_ARID2	P48742_Q68CP9	Homeodomain	RFX_DNA_binding
HOXA1_RFX2	P49639_P48378	Homeodomain	RFX_DNA_binding
LHX2_ARID2	P50458_Q68CP9	Homeodomain	RFX_DNA_binding
PDX1_RFX2	P52945_P48378	Homeodomain	RFX_DNA_binding
PDX1_RFX5	P52945_P48382	Homeodomain	RFX_DNA_binding
PDX1_ARID2	P52945_Q68CP9	Homeodomain	RFX_DNA_binding
POU5F1_RFX2	Q01860_P48378	Homeodomain	RFX_DNA_binding
POU5F1_RFX5	Q01860_P48382	Homeodomain	RFX_DNA_binding
RFX4_CERS2	Q33E94_Q96G23	RFX_DNA_binding	Homeodomain
LHX8_ARID2	Q68G74_Q68CP9	Homeodomain	RFX_DNA_binding
RFX6_PITX1	Q8HWS3_P78337	RFX_DNA_binding	Homeodomain
RFX6_ISL2	Q8HWS3_Q96A47	RFX_DNA_binding	Homeodomain
RFX6_SIX4	Q8HWS3_Q9UIU6	RFX_DNA_binding	Homeodomain
SIX5_RFX5	Q8N196_P48382	Homeodomain	RFX_DNA_binding
SIX5_ARID2	Q8N196_Q68CP9	Homeodomain	RFX_DNA_binding
SIX5_RFX8	Q8N196_Q6ZV50	Homeodomain	RFX_DNA_binding
LHX4_ARID2	Q969G2_Q68CP9	Homeodomain	RFX_DNA_binding
LHX3_ARID2	Q9UBR4_Q68CP9	Homeodomain	RFX_DNA_binding
SIX4_ARID2	Q9UIU6_Q68CP9	Homeodomain	RFX_DNA_binding
LHX6_ARID2	Q9UPM6_Q68CP9	Homeodomain	RFX_DNA_binding
SATB2_RFX1	Q9UPW6_P22670	Homeodomain	RFX_DNA_binding
SATB2_ARID2	Q9UPW6_Q68CP9	Homeodomain	RFX_DNA_binding
ETV2_ETV2	O00321_O00321	Ets	Ets
SPDEF_SPDEF	O95238_O95238	Ets	Ets
ERG_ERG	P11308_P11308	Ets	Ets
ETS1_ETS1	P14921_P14921	Ets	Ets
ETS2_ETS2	P15036_P15036	Ets	Ets
SPI1_SPI1	P17947_P17947	Ets	Ets
ELK1_ELK1	P19419_P19419	Ets	Ets
ELK4_ELK4	P28324_P28324	Ets	Ets
ELF1_ELF1	P32519_P32519	Ets	Ets
ETV5_ETV5	P41161_P41161	Ets	Ets
ETV3_ETV3	P41162_P41162	Ets	Ets
ETV6_ETV6	P41212_P41212	Ets	Ets
ELK3_ELK3	P41970_P41970	Ets	Ets
ETV4_ETV4	P43268_P43268	Ets	Ets
ERF_ERF	P50548_P50548	Ets	Ets
ETV1_ETV1	P50549_P50549	Ets	Ets
ELF3_ELF3	P78545_P78545	Ets	Ets
FLI1_FLI1	Q01543_Q01543	Ets	Ets
SPIB_SPIB	Q01892_Q01892	Ets	Ets
GABPA_GABPA	Q06546_Q06546	Ets	Ets
ELF2_ELF1	Q15723_P32519	Ets	Ets
ELF2_ELF2	Q15723_Q15723	Ets	Ets
ETV3L_ETV3L	Q6ZN32_Q6ZN32	Ets	Ets
SPIC_SPIC	Q8N5J4_Q8N5J4	Ets	Ets
FEV_FEV	Q99581_Q99581	Ets	Ets
ELF4_ELF4	Q99607_Q99607	Ets	Ets
EHF_EHF	Q9NZC4_Q9NZC4	Ets	Ets
ELF5_ELF5	Q9UKW6_Q9UKW6	Ets	Ets
ETV7_ETV6	Q9Y603_P41212	Ets	Ets
ETV7_ETV7	Q9Y603_Q9Y603	Ets	Ets
ETV2_ERF	O00321_P50548	Ets	Ets
ETV2_FLI1	O00321_Q01543	Ets	Ets
ERG_FLI1	P11308_Q01543	Ets	Ets
SPI1_ETV6	P17947_P41212	Ets	Ets
SPI1_FLI1	P17947_Q01543	Ets	Ets
ELF1_GABPA	P32519_Q06546	Ets	Ets
ELF1_ELF2	P32519_Q15723	Ets	Ets
ETV3_GABPA	P41162_Q06546	Ets	Ets
ELK3_GABPA	P41970_Q06546	Ets	Ets
ETV4_FLI1	P43268_Q01543	Ets	Ets
FLI1_ERG	Q01543_P11308	Ets	Ets
FLI1_ETV6	Q01543_P41212	Ets	Ets
SPIB_FLI1	Q01892_Q01543	Ets	Ets
ELF2_GABPA	Q15723_Q06546	Ets	Ets
ETV3L_ELF1	Q6ZN32_P32519	Ets	Ets
ETV3L_ETV3	Q6ZN32_P41162	Ets	Ets
SPIC_FLI1	Q8N5J4_Q01543	Ets	Ets
FEV_ELF1	Q99581_P32519	Ets	Ets
FEV_GABPA	Q99581_Q06546	Ets	Ets
ELF4_GABPA	Q99607_Q06546	Ets	Ets
ELF4_ELF2	Q99607_Q15723	Ets	Ets
ONECUT2_TFAP4	O95948_Q01664	Homeodomain	HLH
USF1_HOXA9	P22415_P31269	HLH	Homeodomain
CPHXL_TCF3	A0A1W2PPM1_P15923	Homeodomain	HLH
CPHXL_TFE3	A0A1W2PPM1_P19532	Homeodomain	HLH
CPHXL_NCOA1	A0A1W2PPM1_Q15788	Homeodomain	HLH
LEUTX_MITF	A8MZ59_O75030	Homeodomain	HLH
LEUTX_TFE3	A8MZ59_P19532	Homeodomain	HLH
LEUTX_MGA	A8MZ59_Q8IWI9	Homeodomain	HLH
CRX_ARNT	O43186_P27540	Homeodomain	HLH
CRX_TFAP4	O43186_Q01664	Homeodomain	HLH
CRX_NCOA1	O43186_Q15788	Homeodomain	HLH
CRX_MGA	O43186_Q8IWI9	Homeodomain	HLH
HOXA2_BHLHA15	O43364_Q7RTS1	Homeodomain	HLH
HOXA2_MGA	O43364_Q8IWI9	Homeodomain	HLH
HOXA3_TCF3	O43365_P15923	Homeodomain	HLH
HOXA3_TFE3	O43365_P19532	Homeodomain	HLH
HOXA3_AHR	O43365_P35869	Homeodomain	HLH
HOXA3_SIM1	O43365_P81133	Homeodomain	HLH
HOXA3_TFAP4	O43365_Q01664	Homeodomain	HLH
HOXA3_NCOA1	O43365_Q15788	Homeodomain	HLH
HOXA3_ARNT2	O43365_Q9HBZ2	Homeodomain	HLH
TLX3_TFE3	O43711_P19532	Homeodomain	HLH
DLX3_TCF3	O60479_P15923	Homeodomain	HLH
DLX3_TFE3	O60479_P19532	Homeodomain	HLH
DLX3_TFAP4	O60479_Q01664	Homeodomain	HLH
ONECUT2_TCF3	O95948_P15923	Homeodomain	HLH
ONECUT2_TFEB	O95948_P19484	Homeodomain	HLH
ONECUT2_TFE3	O95948_P19532	Homeodomain	HLH
ONECUT2_SIM1	O95948_P81133	Homeodomain	HLH
ONECUT2_NCOA1	O95948_Q15788	Homeodomain	HLH
HOXB2_TFE3	P14652_P19532	Homeodomain	HLH
HOXB2_NCOA1	P14652_Q15788	Homeodomain	HLH
HOXB2_MGA	P14652_Q8IWI9	Homeodomain	HLH
POU2F1_BMAL1	P14859_O00327	Homeodomain	HLH
POU2F1_CLOCK	P14859_O15516	Homeodomain	HLH
POU2F1_TFE3	P14859_P19532	Homeodomain	HLH
POU2F1_USF1	P14859_P22415	Homeodomain	HLH
POU2F1_TFAP4	P14859_Q01664	Homeodomain	HLH
POU2F1_MGA	P14859_Q8IWI9	Homeodomain	HLH
MYOD1_CUX1	P15172_P39880	HLH	Homeodomain
TCF3_MNX1	P15923_P50219	HLH	Homeodomain
TCF3_PITX1	P15923_P78337	HLH	Homeodomain
TCF3_ISL2	P15923_Q96A47	HLH	Homeodomain
TCF3_NKX2-4	P15923_Q9H2Z4	HLH	Homeodomain
TCF3_SIX4	P15923_Q9UIU6	HLH	Homeodomain
HOXA5_TFE3	P20719_P19532	Homeodomain	HLH
HOXA5_SIM1	P20719_P81133	Homeodomain	HLH
HOXA5_TFAP4	P20719_Q01664	Homeodomain	HLH
HOXA5_MGA	P20719_Q8IWI9	Homeodomain	HLH
USF1_PBX2	P22415_P40425	HLH	Homeodomain
USF1_MNX1	P22415_P50219	HLH	Homeodomain
USF1_PITX1	P22415_P78337	HLH	Homeodomain
USF1_SATB1	P22415_Q01826	HLH	Homeodomain
USF1_HMBOX1	P22415_Q6NT76	HLH	Homeodomain
USF1_ZFHX4	P22415_Q86UP3	HLH	Homeodomain
USF1_ISL2	P22415_Q96A47	HLH	Homeodomain
USF1_NKX2-4	P22415_Q9H2Z4	HLH	Homeodomain
USF1_SIX4	P22415_Q9UIU6	HLH	Homeodomain
USF1_ZHX1	P22415_Q9UKY1	HLH	Homeodomain
USF1_SATB2	P22415_Q9UPW6	HLH	Homeodomain
PAX7_ARNT	P23759_P27540	Homeodomain	HLH
PAX6_TFAP4	P26367_Q01664	Homeodomain	HLH
PAX6_MGA	P26367_Q8IWI9	Homeodomain	HLH
HOXA10_TFE3	P31260_P19532	Homeodomain	HLH
HOXA10_SIM1	P31260_P81133	Homeodomain	HLH
HOXA10_TFAP4	P31260_Q01664	Homeodomain	HLH
HOXA10_MGA	P31260_Q8IWI9	Homeodomain	HLH
HOXA9_TFE3	P31269_P19532	Homeodomain	HLH
HOXA9_SIM1	P31269_P81133	Homeodomain	HLH
HOXA9_TFAP4	P31269_Q01664	Homeodomain	HLH
HOXA9_BHLHA15	P31269_Q7RTS1	Homeodomain	HLH
HOXA11_TFAP4	P31270_Q01664	Homeodomain	HLH
HOXA11_BHLHA15	P31270_Q7RTS1	Homeodomain	HLH
TLX1_TFAP4	P31314_Q01664	Homeodomain	HLH
OTX2_ARNT	P32243_P27540	Homeodomain	HLH
OTX2_TFAP4	P32243_Q01664	Homeodomain	HLH
OTX2_MGA	P32243_Q8IWI9	Homeodomain	HLH
HOXD12_TFE3	P35452_P19532	Homeodomain	HLH
HOXD12_SIM1	P35452_P81133	Homeodomain	HLH
HOXD12_TFAP4	P35452_Q01664	Homeodomain	HLH
HOXD12_NCOA1	P35452_Q15788	Homeodomain	HLH
HOXD12_MGA	P35452_Q8IWI9	Homeodomain	HLH
LHX1_MGA	P48742_Q8IWI9	Homeodomain	HLH
HOXA1_TFE3	P49639_P19532	Homeodomain	HLH
HOXA1_SIM1	P49639_P81133	Homeodomain	HLH
HOXA1_TFAP4	P49639_Q01664	Homeodomain	HLH
HOXA1_NCOA1	P49639_Q15788	Homeodomain	HLH
LHX2_MGA	P50458_Q8IWI9	Homeodomain	HLH
PDX1_TFE3	P52945_P19532	Homeodomain	HLH
PDX1_SIM1	P52945_P81133	Homeodomain	HLH
PDX1_TFAP4	P52945_Q01664	Homeodomain	HLH
PDX1_MGA	P52945_Q8IWI9	Homeodomain	HLH
GSC_ARNT	P56915_P27540	Homeodomain	HLH
MAX_HOXB9	P61244_P17482	HLH	Homeodomain
MAX_ZFHX4	P61244_Q86UP3	HLH	Homeodomain
MAX_ZHX1	P61244_Q9UKY1	HLH	Homeodomain
HOXA4_TFAP4	Q00056_Q01664	Homeodomain	HLH
TFAP4_HOXA9	Q01664_P31269	HLH	Homeodomain
TFAP4_CUX1	Q01664_P39880	HLH	Homeodomain
TFAP4_PITX1	Q01664_P78337	HLH	Homeodomain
TFAP4_ZFHX4	Q01664_Q86UP3	HLH	Homeodomain
TFAP4_SIX5	Q01664_Q8N196	HLH	Homeodomain
TFAP4_SIX4	Q01664_Q9UIU6	HLH	Homeodomain
SATB1_TFE3	Q01826_P19532	Homeodomain	HLH
POU5F1_TFE3	Q01860_P19532	Homeodomain	HLH
POU5F1_SIM1	Q01860_P81133	Homeodomain	HLH
FIGLA_ZFHX4	Q6QHK4_Q86UP3	HLH	Homeodomain
BHLHA15_MNX1	Q7RTS1_P50219	HLH	Homeodomain
BHLHA15_PITX1	Q7RTS1_P78337	HLH	Homeodomain
BHLHA15_SIX5	Q7RTS1_Q8N196	HLH	Homeodomain
BHLHA15_SIX4	Q7RTS1_Q9UIU6	HLH	Homeodomain
SIX5_BMAL1	Q8N196_O00327	Homeodomain	HLH
SIX5_CLOCK	Q8N196_O15516	Homeodomain	HLH
LHX4_MGA	Q969G2_Q8IWI9	Homeodomain	HLH
HES7_ZFHX4	Q9BYE0_Q86UP3	HLH	Homeodomain
VSX1_TFE3	Q9NZR4_P19532	Homeodomain	HLH
LHX3_MGA	Q9UBR4_Q8IWI9	Homeodomain	HLH
DUX4_TFE3	Q9UBX2_P19532	Homeodomain	HLH
DUX4_NCOA1	Q9UBX2_Q15788	Homeodomain	HLH
DUX4_MGA	Q9UBX2_Q8IWI9	Homeodomain	HLH
SATB2_TFAP4	Q9UPW6_Q01664	Homeodomain	HLH
SATB2_MGA	Q9UPW6_Q8IWI9	Homeodomain	HLH
ZHX2_TFAP4	Q9Y6X8_Q01664	Homeodomain	HLH
CPHXL_ETV6	A0A1W2PPM1_P41212	Homeodomain	SAM_PNT
CPHXL_FLI1	A0A1W2PPM1_Q01543	Homeodomain	SAM_PNT
LEUTX_FLI1	A8MZ59_Q01543	Homeodomain	SAM_PNT
CRX_FLI1	O43186_Q01543	Homeodomain	SAM_PNT
HOXA3_ETV6	O43365_P41212	Homeodomain	SAM_PNT
HOXA3_FLI1	O43365_Q01543	Homeodomain	SAM_PNT
DLX3_ETV6	O60479_P41212	Homeodomain	SAM_PNT
DLX3_FLI1	O60479_Q01543	Homeodomain	SAM_PNT
ONECUT2_ERG	O95948_P11308	Homeodomain	SAM_PNT
ONECUT2_FLI1	O95948_Q01543	Homeodomain	SAM_PNT
ERG_ZFHX4	P11308_Q86UP3	SAM_PNT	Homeodomain
ERG_ISL2	P11308_Q96A47	SAM_PNT	Homeodomain
ERG_SATB2	P11308_Q9UPW6	SAM_PNT	Homeodomain
HOXB2_FLI1	P14652_Q01543	Homeodomain	SAM_PNT
POU2F1_FLI1	P14859_Q01543	Homeodomain	SAM_PNT
HOXA5_FLI1	P20719_Q01543	Homeodomain	SAM_PNT
PAX7_FLI1	P23759_Q01543	Homeodomain	SAM_PNT
HOXA10_ETV6	P31260_P41212	Homeodomain	SAM_PNT
HOXA10_FLI1	P31260_Q01543	Homeodomain	SAM_PNT
HOXA9_ERG	P31269_P11308	Homeodomain	SAM_PNT
HOXA9_FLI1	P31269_Q01543	Homeodomain	SAM_PNT
HOXA11_FLI1	P31270_Q01543	Homeodomain	SAM_PNT
OTX2_FLI1	P32243_Q01543	Homeodomain	SAM_PNT
HOXD12_ETV6	P35452_P41212	Homeodomain	SAM_PNT
HOXD12_FLI1	P35452_Q01543	Homeodomain	SAM_PNT
HOXA1_ETV6	P49639_P41212	Homeodomain	SAM_PNT
HOXA1_FLI1	P49639_Q01543	Homeodomain	SAM_PNT
PDX1_FLI1	P52945_Q01543	Homeodomain	SAM_PNT
GSC_FLI1	P56915_Q01543	Homeodomain	SAM_PNT
HOXA4_FLI1	Q00056_Q01543	Homeodomain	SAM_PNT
FLI1_HOXD11	Q01543_P31277	SAM_PNT	Homeodomain
FLI1_ZFHX3	Q01543_Q15911	SAM_PNT	Homeodomain
FLI1_ZFHX4	Q01543_Q86UP3	SAM_PNT	Homeodomain
FLI1_ISL2	Q01543_Q96A47	SAM_PNT	Homeodomain
FLI1_CERS2	Q01543_Q96G23	SAM_PNT	Homeodomain
FLI1_PITX2	Q01543_Q99697	SAM_PNT	Homeodomain
FLI1_NKX2-4	Q01543_Q9H2Z4	SAM_PNT	Homeodomain
POU5F1_FLI1	Q01860_Q01543	Homeodomain	SAM_PNT
GABPA_ZHX1	Q06546_Q9UKY1	SAM_PNT	Homeodomain
LHX4_GABPA	Q969G2_Q06546	Homeodomain	SAM_PNT
LHX3_GABPA	Q9UBR4_Q06546	Homeodomain	SAM_PNT
ELF5_NKX2-5	Q9UKW6_P52952	SAM_PNT	Homeodomain
ELF5_SATB1	Q9UKW6_Q01826	SAM_PNT	Homeodomain
ELF5_SATB2	Q9UKW6_Q9UPW6	SAM_PNT	Homeodomain
SATB2_FLI1	Q9UPW6_Q01543	Homeodomain	SAM_PNT
ETV7_MNX1	Q9Y603_P50219	SAM_PNT	Homeodomain
ETV7_NKX2-4	Q9Y603_Q9H2Z4	SAM_PNT	Homeodomain
ETV7_SATB2	Q9Y603_Q9UPW6	SAM_PNT	Homeodomain
ZHX2_FLI1	Q9Y6X8_Q01543	Homeodomain	SAM_PNT
CPHXL_SMAD4	A0A1W2PPM1_Q13485	Homeodomain	MH1
LEUTX_NFIB	A8MZ59_O00712	Homeodomain	MH1
LEUTX_NFIC	A8MZ59_P08651	Homeodomain	MH1
LEUTX_NFIA	A8MZ59_Q12857	Homeodomain	MH1
NFIB_CUX1	O00712_P39880	MH1	Homeodomain
NFIB_PITX1	O00712_P78337	MH1	Homeodomain
NFIB_ZFHX4	O00712_Q86UP3	MH1	Homeodomain
NFIB_NKX2-4	O00712_Q9H2Z4	MH1	Homeodomain
NFIB_SIX4	O00712_Q9UIU6	MH1	Homeodomain
NFIB_SATB2	O00712_Q9UPW6	MH1	Homeodomain
CRX_NFIC	O43186_P08651	Homeodomain	MH1
CRX_NFIA	O43186_Q12857	Homeodomain	MH1
HOXA2_NFIC	O43364_P08651	Homeodomain	MH1
HOXA3_NFIB	O43365_O00712	Homeodomain	MH1
HOXA3_NFIC	O43365_P08651	Homeodomain	MH1
HOXA3_SMAD4	O43365_Q13485	Homeodomain	MH1
HOXA3_NFIX	O43365_Q14938	Homeodomain	MH1
TLX3_NFIB	O43711_O00712	Homeodomain	MH1
TLX3_NFIC	O43711_P08651	Homeodomain	MH1
TLX3_NFIA	O43711_Q12857	Homeodomain	MH1
TLX2_NFIB	O43763_O00712	Homeodomain	MH1
TLX2_NFIA	O43763_Q12857	Homeodomain	MH1
DLX3_NFIB	O60479_O00712	Homeodomain	MH1
DLX3_SMAD4	O60479_Q13485	Homeodomain	MH1
ONECUT2_NFIC	O95948_P08651	Homeodomain	MH1
ONECUT2_SMAD4	O95948_Q13485	Homeodomain	MH1
NFIC_POU2F1	P08651_P14859	MH1	Homeodomain
NFIC_CUX1	P08651_P39880	MH1	Homeodomain
NFIC_PBX2	P08651_P40425	MH1	Homeodomain
NFIC_MNX1	P08651_P50219	MH1	Homeodomain
NFIC_PITX1	P08651_P78337	MH1	Homeodomain
NFIC_ZFHX4	P08651_Q86UP3	MH1	Homeodomain
NFIC_NKX2-4	P08651_Q9H2Z4	MH1	Homeodomain
NFIC_SIX4	P08651_Q9UIU6	MH1	Homeodomain
NFIC_ZHX1	P08651_Q9UKY1	MH1	Homeodomain
NFIC_SATB2	P08651_Q9UPW6	MH1	Homeodomain
HOXB2_NFIB	P14652_O00712	Homeodomain	MH1
HOXB2_NFIA	P14652_Q12857	Homeodomain	MH1
POU2F1_NFIB	P14859_O00712	Homeodomain	MH1
POU2F1_NFIC	P14859_P08651	Homeodomain	MH1
POU2F1_NFIA	P14859_Q12857	Homeodomain	MH1
HOXA5_NFIB	P20719_O00712	Homeodomain	MH1
HOXA5_NFIC	P20719_P08651	Homeodomain	MH1
HOXA5_NFIX	P20719_Q14938	Homeodomain	MH1
PAX7_NFIB	P23759_O00712	Homeodomain	MH1
PAX7_NFIC	P23759_P08651	Homeodomain	MH1
PAX7_NFIA	P23759_Q12857	Homeodomain	MH1
PAX6_NFIB	P26367_O00712	Homeodomain	MH1
PAX6_NFIA	P26367_Q12857	Homeodomain	MH1
HOXA10_NFIB	P31260_O00712	Homeodomain	MH1
HOXA10_NFIC	P31260_P08651	Homeodomain	MH1
HOXA10_SMAD4	P31260_Q13485	Homeodomain	MH1
HOXA10_NFIX	P31260_Q14938	Homeodomain	MH1
HOXA9_NFIB	P31269_O00712	Homeodomain	MH1
HOXA9_NFIC	P31269_P08651	Homeodomain	MH1
HOXA9_SMAD4	P31269_Q13485	Homeodomain	MH1
HOXA9_NFIX	P31269_Q14938	Homeodomain	MH1
TLX1_NFIB	P31314_O00712	Homeodomain	MH1
TLX1_NFIC	P31314_P08651	Homeodomain	MH1
TLX1_NFIA	P31314_Q12857	Homeodomain	MH1
OTX2_NFIA	P32243_Q12857	Homeodomain	MH1
HOXD12_NFIB	P35452_O00712	Homeodomain	MH1
HOXD12_NFIC	P35452_P08651	Homeodomain	MH1
HOXD12_NFIA	P35452_Q12857	Homeodomain	MH1
HOXD12_SMAD4	P35452_Q13485	Homeodomain	MH1
HOXD12_NFIX	P35452_Q14938	Homeodomain	MH1
LHX1_NFIB	P48742_O00712	Homeodomain	MH1
HOXA1_NFIB	P49639_O00712	Homeodomain	MH1
HOXA1_NFIC	P49639_P08651	Homeodomain	MH1
HOXA1_SMAD4	P49639_Q13485	Homeodomain	MH1
LHX2_NFIB	P50458_O00712	Homeodomain	MH1
LHX2_NFIA	P50458_Q12857	Homeodomain	MH1
PDX1_NFIB	P52945_O00712	Homeodomain	MH1
PDX1_NFIC	P52945_P08651	Homeodomain	MH1
PDX1_SMAD4	P52945_Q13485	Homeodomain	MH1
GSC_NFIC	P56915_P08651	Homeodomain	MH1
GSC_NFIA	P56915_Q12857	Homeodomain	MH1
HOXA4_SMAD4	Q00056_Q13485	Homeodomain	MH1
POU5F1_SMAD4	Q01860_Q13485	Homeodomain	MH1
NFIA_HOXB9	Q12857_P17482	MH1	Homeodomain
NFIA_CUX1	Q12857_P39880	MH1	Homeodomain
NFIA_MNX1	Q12857_P50219	MH1	Homeodomain
NFIA_PITX1	Q12857_P78337	MH1	Homeodomain
NFIA_ZFHX3	Q12857_Q15911	MH1	Homeodomain
NFIA_ZFHX4	Q12857_Q86UP3	MH1	Homeodomain
NFIA_SIX4	Q12857_Q9UIU6	MH1	Homeodomain
NFIA_SATB2	Q12857_Q9UPW6	MH1	Homeodomain
NFIX_POU2F1	Q14938_P14859	MH1	Homeodomain
NFIX_CUX1	Q14938_P39880	MH1	Homeodomain
NFIX_ZFHX3	Q14938_Q15911	MH1	Homeodomain
NFIX_ZFHX4	Q14938_Q86UP3	MH1	Homeodomain
NFIX_SIX4	Q14938_Q9UIU6	MH1	Homeodomain
NFIX_SATB2	Q14938_Q9UPW6	MH1	Homeodomain
NFIX_ZHX2	Q14938_Q9Y6X8	MH1	Homeodomain
SIX5_SMAD4	Q8N196_Q13485	Homeodomain	MH1
SIX5_SMAD1	Q8N196_Q15797	Homeodomain	MH1
LHX4_NFIB	Q969G2_O00712	Homeodomain	MH1
LHX4_NFIA	Q969G2_Q12857	Homeodomain	MH1
PBX4_NFIB	Q9BYU1_O00712	Homeodomain	MH1
PBX4_SMAD4	Q9BYU1_Q13485	Homeodomain	MH1
VSX1_NFIB	Q9NZR4_O00712	Homeodomain	MH1
VSX1_NFIA	Q9NZR4_Q12857	Homeodomain	MH1
LHX3_NFIA	Q9UBR4_Q12857	Homeodomain	MH1
DUX4_NFIB	Q9UBX2_O00712	Homeodomain	MH1
DUX4_NFIA	Q9UBX2_Q12857	Homeodomain	MH1
SIX4_SMAD4	Q9UIU6_Q13485	Homeodomain	MH1
SATB2_NFIC	Q9UPW6_P08651	Homeodomain	MH1
SATB2_NFIA	Q9UPW6_Q12857	Homeodomain	MH1
ZHX2_NFIB	Q9Y6X8_O00712	Homeodomain	MH1
ETV2_ZNF292	O00321_O60281	Ets	zf-C2H2
ETV2_HIVEP1	O00321_P15822	Ets	zf-C2H2
ETV2_MECOM	O00321_Q03112	Ets	zf-C2H2
ETV2_ZFHX3	O00321_Q15911	Ets	zf-C2H2
ETV2_ZNF746	O00321_Q6NUN9	Ets	zf-C2H2
ETV2_ZNF516	O00321_Q92618	Ets	zf-C2H2
ETV2_RREB1	O00321_Q92766	Ets	zf-C2H2
ETV2_BCL11A	O00321_Q9H165	Ets	zf-C2H2
ETV2_PRDM16	O00321_Q9HAZ2	Ets	zf-C2H2
ETV2_SALL1	O00321_Q9NSC2	Ets	zf-C2H2
ETV2_ZNF148	O00321_Q9UQR1	Ets	zf-C2H2
KLF8_ELF1	O95600_P32519	zf-C2H2	Ets
KLF8_GABPA	O95600_Q06546	zf-C2H2	Ets
KLF8_ELF2	O95600_Q15723	zf-C2H2	Ets
EGR2_FLI1	P11161_Q01543	zf-C2H2	Ets
ERG_HIVEP1	P11308_P15822	Ets	zf-C2H2
ERG_ZNF746	P11308_Q6NUN9	Ets	zf-C2H2
ERG_ZFHX4	P11308_Q86UP3	Ets	zf-C2H2
ERG_ZNF521	P11308_Q96K83	Ets	zf-C2H2
ERG_ZNF148	P11308_Q9UQR1	Ets	zf-C2H2
ERG_ZNF281	P11308_Q9Y2X9	Ets	zf-C2H2
ETS1_HIVEP1	P14921_P15822	Ets	zf-C2H2
SPI1_HIVEP1	P17947_P15822	Ets	zf-C2H2
SPI1_YY1	P17947_P25490	Ets	zf-C2H2
SPI1_MECOM	P17947_Q03112	Ets	zf-C2H2
SPI1_ZFHX3	P17947_Q15911	Ets	zf-C2H2
SPI1_ZNF746	P17947_Q6NUN9	Ets	zf-C2H2
SPI1_ZFHX4	P17947_Q86UP3	Ets	zf-C2H2
SPI1_ZNF516	P17947_Q92618	Ets	zf-C2H2
SPI1_RREB1	P17947_Q92766	Ets	zf-C2H2
SPI1_ZNF521	P17947_Q96K83	Ets	zf-C2H2
SPI1_BCL11A	P17947_Q9H165	Ets	zf-C2H2
SPI1_PRDM16	P17947_Q9HAZ2	Ets	zf-C2H2
SPI1_SALL1	P17947_Q9NSC2	Ets	zf-C2H2
SPI1_ZBTB40	P17947_Q9NUA8	Ets	zf-C2H2
SPI1_ZNF148	P17947_Q9UQR1	Ets	zf-C2H2
ELK1_ZBTB14	P19419_O43829	Ets	zf-C2H2
ELK1_SP1	P19419_P08047	Ets	zf-C2H2
ELK1_ZNF143	P19419_P52747	Ets	zf-C2H2
ELK1_VEZF1	P19419_Q14119	Ets	zf-C2H2
ELK1_RREB1	P19419_Q92766	Ets	zf-C2H2
ELK1_SALL1	P19419_Q9NSC2	Ets	zf-C2H2
ELF1_ZNF536	P32519_O15090	Ets	zf-C2H2
ELF1_SP1	P32519_P08047	Ets	zf-C2H2
ELF1_HIVEP1	P32519_P15822	Ets	zf-C2H2
ELF1_YY1	P32519_P25490	Ets	zf-C2H2
ELF1_ZNF200	P32519_P98182	Ets	zf-C2H2
ELF1_SP2	P32519_Q02086	Ets	zf-C2H2
ELF1_ZNF687	P32519_Q8N1G0	Ets	zf-C2H2
ELF1_RREB1	P32519_Q92766	Ets	zf-C2H2
ELF1_ZBTB40	P32519_Q9NUA8	Ets	zf-C2H2
ELF1_ZNF148	P32519_Q9UQR1	Ets	zf-C2H2
ETV3_ZNF512	P41162_Q96ME7	Ets	zf-C2H2
ETV3_ZNF148	P41162_Q9UQR1	Ets	zf-C2H2
ETV6_INSM1	P41212_Q01101	Ets	zf-C2H2
ETV6_ZNF146	P41212_Q15072	Ets	zf-C2H2
ELK3_ZBTB14	P41970_O43829	Ets	zf-C2H2
ELK3_ZEB2	P41970_O60315	Ets	zf-C2H2
ELK3_ZNF217	P41970_O75362	Ets	zf-C2H2
ELK3_HIVEP1	P41970_P15822	Ets	zf-C2H2
ELK3_YY1	P41970_P25490	Ets	zf-C2H2
ELK3_SP2	P41970_Q02086	Ets	zf-C2H2
ELK3_MECOM	P41970_Q03112	Ets	zf-C2H2
ELK3_VEZF1	P41970_Q14119	Ets	zf-C2H2
ELK3_ZNF746	P41970_Q6NUN9	Ets	zf-C2H2
ELK3_ZFHX4	P41970_Q86UP3	Ets	zf-C2H2
ELK3_RREB1	P41970_Q92766	Ets	zf-C2H2
ELK3_PRDM16	P41970_Q9HAZ2	Ets	zf-C2H2
ELK3_ZNF148	P41970_Q9UQR1	Ets	zf-C2H2
ELK3_ZNF281	P41970_Q9Y2X9	Ets	zf-C2H2
ERF_ZNF148	P50548_Q9UQR1	Ets	zf-C2H2
KLF3_ELF1	P57682_P32519	zf-C2H2	Ets
KLF3_GABPA	P57682_Q06546	zf-C2H2	Ets
KLF3_ELF2	P57682_Q15723	zf-C2H2	Ets
ELF3_ZNF536	P78545_O15090	Ets	zf-C2H2
ELF3_ZNF808	P78545_Q8N4W9	Ets	zf-C2H2
FLI1_ZNF292	Q01543_O60281	Ets	zf-C2H2
FLI1_ZEB2	Q01543_O60315	Ets	zf-C2H2
FLI1_SP1	Q01543_P08047	Ets	zf-C2H2
FLI1_HIVEP1	Q01543_P15822	Ets	zf-C2H2
FLI1_YY1	Q01543_P25490	Ets	zf-C2H2
FLI1_HIVEP2	Q01543_P31629	Ets	zf-C2H2
FLI1_ZNF143	Q01543_P52747	Ets	zf-C2H2
FLI1_MECOM	Q01543_Q03112	Ets	zf-C2H2
FLI1_ZFHX3	Q01543_Q15911	Ets	zf-C2H2
FLI1_ZNF423	Q01543_Q2M1K9	Ets	zf-C2H2
FLI1_ZNF746	Q01543_Q6NUN9	Ets	zf-C2H2
FLI1_ZFHX4	Q01543_Q86UP3	Ets	zf-C2H2
FLI1_ZNF516	Q01543_Q92618	Ets	zf-C2H2
FLI1_RREB1	Q01543_Q92766	Ets	zf-C2H2
FLI1_ZNF521	Q01543_Q96K83	Ets	zf-C2H2
FLI1_BCL11B	Q01543_Q9C0K0	Ets	zf-C2H2
FLI1_BCL11A	Q01543_Q9H165	Ets	zf-C2H2
FLI1_PRDM16	Q01543_Q9HAZ2	Ets	zf-C2H2
FLI1_PATZ1	Q01543_Q9HBE1	Ets	zf-C2H2
FLI1_SALL1	Q01543_Q9NSC2	Ets	zf-C2H2
FLI1_ZNF148	Q01543_Q9UQR1	Ets	zf-C2H2
SPIB_ZNF536	Q01892_O15090	Ets	zf-C2H2
SPIB_SALL1	Q01892_Q9NSC2	Ets	zf-C2H2
SPIB_ZBTB40	Q01892_Q9NUA8	Ets	zf-C2H2
GABPA_ZBTB11	Q06546_O95625	Ets	zf-C2H2
GABPA_YY1	Q06546_P25490	Ets	zf-C2H2
GABPA_ZNF143	Q06546_P52747	Ets	zf-C2H2
GABPA_SP2	Q06546_Q02086	Ets	zf-C2H2
GABPA_ZBTB2	Q06546_Q8N680	Ets	zf-C2H2
GABPA_ZNF592	Q06546_Q92610	Ets	zf-C2H2
GABPA_SALL1	Q06546_Q9NSC2	Ets	zf-C2H2
GABPA_ZNF148	Q06546_Q9UQR1	Ets	zf-C2H2
KLF9_GABPA	Q13886_Q06546	zf-C2H2	Ets
ELF2_ZNF536	Q15723_O15090	Ets	zf-C2H2
ELF2_ZBTB14	Q15723_O43829	Ets	zf-C2H2
ELF2_ZEB2	Q15723_O60315	Ets	zf-C2H2
ELF2_ZBTB11	Q15723_O95625	Ets	zf-C2H2
ELF2_HIVEP1	Q15723_P15822	Ets	zf-C2H2
ELF2_YY1	Q15723_P25490	Ets	zf-C2H2
ELF2_ZEB1	Q15723_P37275	Ets	zf-C2H2
ELF2_ZNF143	Q15723_P52747	Ets	zf-C2H2
ELF2_ZNF200	Q15723_P98182	Ets	zf-C2H2
ELF2_SP2	Q15723_Q02086	Ets	zf-C2H2
ELF2_ZNF746	Q15723_Q6NUN9	Ets	zf-C2H2
ELF2_ZNF574	Q15723_Q6ZN55	Ets	zf-C2H2
ELF2_ZFP82	Q15723_Q8N141	Ets	zf-C2H2
ELF2_ZNF507	Q15723_Q8TCN5	Ets	zf-C2H2
ELF2_RREB1	Q15723_Q92766	Ets	zf-C2H2
ELF2_ZFP91	Q15723_Q96JP5	Ets	zf-C2H2
ELF2_ZBTB40	Q15723_Q9NUA8	Ets	zf-C2H2
ELF2_ZNF148	Q15723_Q9UQR1	Ets	zf-C2H2
ELF2_ZNF281	Q15723_Q9Y2X9	Ets	zf-C2H2
ELF2_ZNF711	Q15723_Q9Y462	Ets	zf-C2H2
ETV3L_ZFHX4	Q6ZN32_Q86UP3	Ets	zf-C2H2
SPIC_ZEB2	Q8N5J4_O60315	Ets	zf-C2H2
SPIC_SP1	Q8N5J4_P08047	Ets	zf-C2H2
SPIC_HIVEP1	Q8N5J4_P15822	Ets	zf-C2H2
SPIC_ZNF24	Q8N5J4_P17028	Ets	zf-C2H2
SPIC_MECOM	Q8N5J4_Q03112	Ets	zf-C2H2
SPIC_ZFHX3	Q8N5J4_Q15911	Ets	zf-C2H2
SPIC_ZNF423	Q8N5J4_Q2M1K9	Ets	zf-C2H2
SPIC_ZFHX4	Q8N5J4_Q86UP3	Ets	zf-C2H2
SPIC_ZNF516	Q8N5J4_Q92618	Ets	zf-C2H2
SPIC_RREB1	Q8N5J4_Q92766	Ets	zf-C2H2
SPIC_BCL11A	Q8N5J4_Q9H165	Ets	zf-C2H2
SPIC_PRDM16	Q8N5J4_Q9HAZ2	Ets	zf-C2H2
SPIC_SALL1	Q8N5J4_Q9NSC2	Ets	zf-C2H2
SPIC_ZNF148	Q8N5J4_Q9UQR1	Ets	zf-C2H2
SP7_FLI1	Q8TDD2_Q01543	zf-C2H2	Ets
SP7_GABPA	Q8TDD2_Q06546	zf-C2H2	Ets
SP7_ELF2	Q8TDD2_Q15723	zf-C2H2	Ets
FEV_ZBTB14	Q99581_O43829	Ets	zf-C2H2
FEV_ZEB2	Q99581_O60315	Ets	zf-C2H2
FEV_ZNF217	Q99581_O75362	Ets	zf-C2H2
FEV_ZBTB7A	Q99581_O95365	Ets	zf-C2H2
FEV_HIVEP1	Q99581_P15822	Ets	zf-C2H2
FEV_ZNF24	Q99581_P17028	Ets	zf-C2H2
FEV_YY1	Q99581_P25490	Ets	zf-C2H2
FEV_ZEB1	Q99581_P37275	Ets	zf-C2H2
FEV_CTCF	Q99581_P49711	Ets	zf-C2H2
FEV_ZNF143	Q99581_P52747	Ets	zf-C2H2
FEV_SP2	Q99581_Q02086	Ets	zf-C2H2
FEV_MECOM	Q99581_Q03112	Ets	zf-C2H2
FEV_RLF	Q99581_Q13129	Ets	zf-C2H2
FEV_VEZF1	Q99581_Q14119	Ets	zf-C2H2
FEV_ZFHX3	Q99581_Q15911	Ets	zf-C2H2
FEV_ZNF691	Q99581_Q5VV52	Ets	zf-C2H2
FEV_ZNF746	Q99581_Q6NUN9	Ets	zf-C2H2
FEV_ZFHX4	Q99581_Q86UP3	Ets	zf-C2H2
FEV_RREB1	Q99581_Q92766	Ets	zf-C2H2
FEV_ZKSCAN4	Q99581_Q969J2	Ets	zf-C2H2
FEV_HIC2	Q99581_Q96JB3	Ets	zf-C2H2
FEV_ZNF521	Q99581_Q96K83	Ets	zf-C2H2
FEV_ZNF512	Q99581_Q96ME7	Ets	zf-C2H2
FEV_ZKSCAN3	Q99581_Q9BRR0	Ets	zf-C2H2
FEV_BCL11A	Q99581_Q9H165	Ets	zf-C2H2
FEV_SALL1	Q99581_Q9NSC2	Ets	zf-C2H2
FEV_ZNF148	Q99581_Q9UQR1	Ets	zf-C2H2
FEV_ZNF281	Q99581_Q9Y2X9	Ets	zf-C2H2
FEV_ZSCAN21	Q99581_Q9Y5A6	Ets	zf-C2H2
ELF4_YY1	Q99607_P25490	Ets	zf-C2H2
ELF4_SP2	Q99607_Q02086	Ets	zf-C2H2
ELF4_ZNF687	Q99607_Q8N1G0	Ets	zf-C2H2
ELF4_ZNF148	Q99607_Q9UQR1	Ets	zf-C2H2
KLF16_ELF1	Q9BXK1_P32519	zf-C2H2	Ets
KLF16_GABPA	Q9BXK1_Q06546	zf-C2H2	Ets
KLF16_ELF2	Q9BXK1_Q15723	zf-C2H2	Ets
KLF15_ERF	Q9UIH9_P50548	zf-C2H2	Ets
ELF5_ZNF281	Q9UKW6_Q9Y2X9	Ets	zf-C2H2
KLF12_GABPA	Q9Y4X4_Q06546	zf-C2H2	Ets
KLF12_ELF2	Q9Y4X4_Q15723	zf-C2H2	Ets
ETV7_HIVEP1	Q9Y603_P15822	Ets	zf-C2H2
SATB2_FOXP4	Q9UPW6_Q8IVH2	Homeodomain	Forkhead
SATB2_FOXP1	Q9UPW6_Q9H334	Homeodomain	Forkhead
FOXA2_SATB2	Q9Y261_Q9UPW6	Forkhead	Homeodomain
CPHXL_FOXP2	A0A1W2PPM1_O15409	Homeodomain	Forkhead
CPHXL_FOXM1	A0A1W2PPM1_Q08050	Homeodomain	Forkhead
CPHXL_FOXC1	A0A1W2PPM1_Q12948	Homeodomain	Forkhead
CPHXL_FOXP4	A0A1W2PPM1_Q8IVH2	Homeodomain	Forkhead
CPHXL_FOXP1	A0A1W2PPM1_Q9H334	Homeodomain	Forkhead
CPHXL_FOXJ3	A0A1W2PPM1_Q9UPW0	Homeodomain	Forkhead
CRX_FOXP2	O43186_O15409	Homeodomain	Forkhead
CRX_FOXK1	O43186_P85037	Homeodomain	Forkhead
CRX_FOXK2	O43186_Q01167	Homeodomain	Forkhead
CRX_FOXP4	O43186_Q8IVH2	Homeodomain	Forkhead
CRX_FOXP1	O43186_Q9H334	Homeodomain	Forkhead
HOXA2_FOXM1	O43364_Q08050	Homeodomain	Forkhead
HOXA2_FOXP4	O43364_Q8IVH2	Homeodomain	Forkhead
HOXA2_FOXP1	O43364_Q9H334	Homeodomain	Forkhead
HOXA3_FOXP2	O43365_O15409	Homeodomain	Forkhead
HOXA3_FOXD2	O43365_O60548	Homeodomain	Forkhead
HOXA3_FOXA1	O43365_P55317	Homeodomain	Forkhead
HOXA3_FOXK1	O43365_P85037	Homeodomain	Forkhead
HOXA3_FOXM1	O43365_Q08050	Homeodomain	Forkhead
HOXA3_FOXC1	O43365_Q12948	Homeodomain	Forkhead
HOXA3_FOXP4	O43365_Q8IVH2	Homeodomain	Forkhead
HOXA3_FOXP1	O43365_Q9H334	Homeodomain	Forkhead
HOXA3_FOXJ3	O43365_Q9UPW0	Homeodomain	Forkhead
TLX3_FOXK1	O43711_P85037	Homeodomain	Forkhead
TLX3_FOXC1	O43711_Q12948	Homeodomain	Forkhead
TLX3_FOXP4	O43711_Q8IVH2	Homeodomain	Forkhead
TLX3_FOXP1	O43711_Q9H334	Homeodomain	Forkhead
TLX2_FOXP4	O43763_Q8IVH2	Homeodomain	Forkhead
DLX3_FOXP2	O60479_O15409	Homeodomain	Forkhead
DLX3_FOXM1	O60479_Q08050	Homeodomain	Forkhead
DLX3_FOXC1	O60479_Q12948	Homeodomain	Forkhead
DLX3_FOXP4	O60479_Q8IVH2	Homeodomain	Forkhead
DLX3_FOXP1	O60479_Q9H334	Homeodomain	Forkhead
DLX3_FOXJ3	O60479_Q9UPW0	Homeodomain	Forkhead
ONECUT2_FOXP2	O95948_O15409	Homeodomain	Forkhead
ONECUT2_FOXA1	O95948_P55317	Homeodomain	Forkhead
ONECUT2_FOXM1	O95948_Q08050	Homeodomain	Forkhead
ONECUT2_FOXC1	O95948_Q12948	Homeodomain	Forkhead
ONECUT2_FOXP4	O95948_Q8IVH2	Homeodomain	Forkhead
ONECUT2_FOXP1	O95948_Q9H334	Homeodomain	Forkhead
ONECUT2_FOXJ3	O95948_Q9UPW0	Homeodomain	Forkhead
HOXB2_FOXP2	P14652_O15409	Homeodomain	Forkhead
HOXB2_FOXC1	P14652_Q12948	Homeodomain	Forkhead
HOXB2_FOXP4	P14652_Q8IVH2	Homeodomain	Forkhead
HOXB2_FOXP1	P14652_Q9H334	Homeodomain	Forkhead
POU2F1_FOXP2	P14859_O15409	Homeodomain	Forkhead
POU2F1_FOXK1	P14859_P85037	Homeodomain	Forkhead
POU2F1_FOXK2	P14859_Q01167	Homeodomain	Forkhead
POU2F1_FOXC1	P14859_Q12948	Homeodomain	Forkhead
POU2F1_FOXP4	P14859_Q8IVH2	Homeodomain	Forkhead
POU2F1_FOXB1	P14859_Q99853	Homeodomain	Forkhead
POU2F1_FOXP1	P14859_Q9H334	Homeodomain	Forkhead
HOXA5_FOXP2	P20719_O15409	Homeodomain	Forkhead
HOXA5_FOXA1	P20719_P55317	Homeodomain	Forkhead
HOXA5_FOXC1	P20719_Q12948	Homeodomain	Forkhead
HOXA5_FOXP4	P20719_Q8IVH2	Homeodomain	Forkhead
HOXA5_FOXP1	P20719_Q9H334	Homeodomain	Forkhead
PAX7_FOXC1	P23759_Q12948	Homeodomain	Forkhead
PAX7_FOXP4	P23759_Q8IVH2	Homeodomain	Forkhead
PAX7_FOXP1	P23759_Q9H334	Homeodomain	Forkhead
PAX6_FOXK1	P26367_P85037	Homeodomain	Forkhead
PAX6_FOXK2	P26367_Q01167	Homeodomain	Forkhead
PAX6_FOXC1	P26367_Q12948	Homeodomain	Forkhead
PAX6_FOXP1	P26367_Q9H334	Homeodomain	Forkhead
HOXA10_FOXP2	P31260_O15409	Homeodomain	Forkhead
HOXA10_FOXA1	P31260_P55317	Homeodomain	Forkhead
HOXA10_FOXM1	P31260_Q08050	Homeodomain	Forkhead
HOXA10_FOXC1	P31260_Q12948	Homeodomain	Forkhead
HOXA10_FOXP4	P31260_Q8IVH2	Homeodomain	Forkhead
HOXA10_FOXP1	P31260_Q9H334	Homeodomain	Forkhead
HOXA9_FOXP2	P31269_O15409	Homeodomain	Forkhead
HOXA9_FOXA1	P31269_P55317	Homeodomain	Forkhead
HOXA9_FOXM1	P31269_Q08050	Homeodomain	Forkhead
HOXA9_FOXC1	P31269_Q12948	Homeodomain	Forkhead
HOXA9_FOXP4	P31269_Q8IVH2	Homeodomain	Forkhead
HOXA9_FOXP1	P31269_Q9H334	Homeodomain	Forkhead
HOXA9_FOXJ3	P31269_Q9UPW0	Homeodomain	Forkhead
HOXA11_FOXP4	P31270_Q8IVH2	Homeodomain	Forkhead
HOXA11_FOXP1	P31270_Q9H334	Homeodomain	Forkhead
TLX1_FOXK1	P31314_P85037	Homeodomain	Forkhead
TLX1_FOXC1	P31314_Q12948	Homeodomain	Forkhead
TLX1_FOXP4	P31314_Q8IVH2	Homeodomain	Forkhead
TLX1_FOXP1	P31314_Q9H334	Homeodomain	Forkhead
OTX1_FOXP4	P32242_Q8IVH2	Homeodomain	Forkhead
OTX2_FOXP2	P32243_O15409	Homeodomain	Forkhead
OTX2_FOXP4	P32243_Q8IVH2	Homeodomain	Forkhead
OTX2_FOXP1	P32243_Q9H334	Homeodomain	Forkhead
HOXD12_FOXP2	P35452_O15409	Homeodomain	Forkhead
HOXD12_FOXK1	P35452_P85037	Homeodomain	Forkhead
HOXD12_FOXM1	P35452_Q08050	Homeodomain	Forkhead
HOXD12_FOXC1	P35452_Q12948	Homeodomain	Forkhead
HOXD12_FOXP4	P35452_Q8IVH2	Homeodomain	Forkhead
HOXD12_FOXP1	P35452_Q9H334	Homeodomain	Forkhead
HOXD12_FOXJ3	P35452_Q9UPW0	Homeodomain	Forkhead
HOXD12_FOXA2	P35452_Q9Y261	Homeodomain	Forkhead
LHX1_FOXP4	P48742_Q8IVH2	Homeodomain	Forkhead
HOXA1_FOXM1	P49639_Q08050	Homeodomain	Forkhead
HOXA1_FOXC1	P49639_Q12948	Homeodomain	Forkhead
HOXA1_FOXP4	P49639_Q8IVH2	Homeodomain	Forkhead
HOXA1_FOXP1	P49639_Q9H334	Homeodomain	Forkhead
LHX2_FOXK1	P50458_P85037	Homeodomain	Forkhead
LHX2_FOXP4	P50458_Q8IVH2	Homeodomain	Forkhead
LHX2_FOXP1	P50458_Q9H334	Homeodomain	Forkhead
PDX1_FOXP2	P52945_O15409	Homeodomain	Forkhead
PDX1_FOXA1	P52945_P55317	Homeodomain	Forkhead
PDX1_FOXC1	P52945_Q12948	Homeodomain	Forkhead
PDX1_FOXP4	P52945_Q8IVH2	Homeodomain	Forkhead
PDX1_FOXP1	P52945_Q9H334	Homeodomain	Forkhead
PDX1_FOXJ3	P52945_Q9UPW0	Homeodomain	Forkhead
FOXA1_HOXB9	P55317_P17482	Forkhead	Homeodomain
FOXA1_PAX6	P55317_P26367	Forkhead	Homeodomain
FOXA1_MNX1	P55317_P50219	Forkhead	Homeodomain
FOXA1_PITX1	P55317_P78337	Forkhead	Homeodomain
FOXA1_ZFHX3	P55317_Q15911	Forkhead	Homeodomain
FOXA1_ZFHX4	P55317_Q86UP3	Forkhead	Homeodomain
FOXA1_SIX5	P55317_Q8N196	Forkhead	Homeodomain
FOXA1_NKX2-4	P55317_Q9H2Z4	Forkhead	Homeodomain
FOXA1_SIX4	P55317_Q9UIU6	Forkhead	Homeodomain
FOXA1_SATB2	P55317_Q9UPW6	Forkhead	Homeodomain
FOXA3_POU2F1	P55318_P14859	Forkhead	Homeodomain
FOXA3_MNX1	P55318_P50219	Forkhead	Homeodomain
FOXA3_PITX1	P55318_P78337	Forkhead	Homeodomain
FOXA3_SIX5	P55318_Q8N196	Forkhead	Homeodomain
FOXA3_SIX4	P55318_Q9UIU6	Forkhead	Homeodomain
GSC_FOXP2	P56915_O15409	Homeodomain	Forkhead
GSC_FOXP4	P56915_Q8IVH2	Homeodomain	Forkhead
GSC_FOXP1	P56915_Q9H334	Homeodomain	Forkhead
PITX1_FOXP4	P78337_Q8IVH2	Homeodomain	Forkhead
HOXA4_FOXC1	Q00056_Q12948	Homeodomain	Forkhead
HOXA4_FOXP4	Q00056_Q8IVH2	Homeodomain	Forkhead
HOXA4_FOXP1	Q00056_Q9H334	Homeodomain	Forkhead
POU5F1_FOXP2	Q01860_O15409	Homeodomain	Forkhead
POU5F1_FOXM1	Q01860_Q08050	Homeodomain	Forkhead
POU5F1_FOXP4	Q01860_Q8IVH2	Homeodomain	Forkhead
POU5F1_FOXP1	Q01860_Q9H334	Homeodomain	Forkhead
FOXI1_SATB1	Q12951_Q01826	Forkhead	Homeodomain
FOXI1_ZFHX4	Q12951_Q86UP3	Forkhead	Homeodomain
FOXI1_SATB2	Q12951_Q9UPW6	Forkhead	Homeodomain
FOXL1_POU2F1	Q12952_P14859	Forkhead	Homeodomain
FOXL1_CUX1	Q12952_P39880	Forkhead	Homeodomain
FOXL1_SATB1	Q12952_Q01826	Forkhead	Homeodomain
FOXL1_ZFHX3	Q12952_Q15911	Forkhead	Homeodomain
FOXL1_ZFHX4	Q12952_Q86UP3	Forkhead	Homeodomain
FOXL1_SIX4	Q12952_Q9UIU6	Forkhead	Homeodomain
FOXL1_SATB2	Q12952_Q9UPW6	Forkhead	Homeodomain
SIX5_FOXP4	Q8N196_Q8IVH2	Homeodomain	Forkhead
SIX5_FOXP1	Q8N196_Q9H334	Homeodomain	Forkhead
LHX4_FOXK1	Q969G2_P85037	Homeodomain	Forkhead
LHX4_FOXP4	Q969G2_Q8IVH2	Homeodomain	Forkhead
PBX4_FOXP4	Q9BYU1_Q8IVH2	Homeodomain	Forkhead
PBX4_FOXP1	Q9BYU1_Q9H334	Homeodomain	Forkhead
FOXQ1_ZFHX4	Q9C009_Q86UP3	Forkhead	Homeodomain
FOXP1_POU2F1	Q9H334_P14859	Forkhead	Homeodomain
FOXP1_PITX1	Q9H334_P78337	Forkhead	Homeodomain
FOXP1_ZFHX4	Q9H334_Q86UP3	Forkhead	Homeodomain
FOXP1_SIX5	Q9H334_Q8N196	Forkhead	Homeodomain
FOXP1_NKX2-4	Q9H334_Q9H2Z4	Forkhead	Homeodomain
FOXP1_SIX4	Q9H334_Q9UIU6	Forkhead	Homeodomain
FOXP1_SATB2	Q9H334_Q9UPW6	Forkhead	Homeodomain
VSX1_FOXP4	Q9NZR4_Q8IVH2	Homeodomain	Forkhead
VSX1_FOXP1	Q9NZR4_Q9H334	Homeodomain	Forkhead
FOXJ2_HOXA9	Q9P0K8_P31269	Forkhead	Homeodomain
FOXJ2_ZFHX3	Q9P0K8_Q15911	Forkhead	Homeodomain
FOXJ2_ZFHX4	Q9P0K8_Q86UP3	Forkhead	Homeodomain
FOXJ2_ZHX1	Q9P0K8_Q9UKY1	Forkhead	Homeodomain
LHX3_FOXK1	Q9UBR4_P85037	Homeodomain	Forkhead
LHX3_FOXP4	Q9UBR4_Q8IVH2	Homeodomain	Forkhead
LHX3_FOXP1	Q9UBR4_Q9H334	Homeodomain	Forkhead
DUX4_FOXK1	Q9UBX2_P85037	Homeodomain	Forkhead
DUX4_FOXC1	Q9UBX2_Q12948	Homeodomain	Forkhead
FOXJ3_NKX2-4	Q9UPW0_Q9H2Z4	Forkhead	Homeodomain
FOXJ3_SIX4	Q9UPW0_Q9UIU6	Forkhead	Homeodomain
SATB2_FOXA1	Q9UPW6_P55317	Homeodomain	Forkhead
SATB2_FOXK1	Q9UPW6_P85037	Homeodomain	Forkhead
SATB2_FOXC1	Q9UPW6_Q12948	Homeodomain	Forkhead
FOXA2_CUX2	Q9Y261_O14529	Forkhead	Homeodomain
FOXA2_ONECUT2	Q9Y261_O95948	Forkhead	Homeodomain
FOXA2_POU2F1	Q9Y261_P14859	Forkhead	Homeodomain
FOXA2_HOXB9	Q9Y261_P17482	Forkhead	Homeodomain
FOXA2_PAX6	Q9Y261_P26367	Forkhead	Homeodomain
FOXA2_HOXA10	Q9Y261_P31260	Forkhead	Homeodomain
FOXA2_HOXC9	Q9Y261_P31274	Forkhead	Homeodomain
FOXA2_CUX1	Q9Y261_P39880	Forkhead	Homeodomain
FOXA2_MNX1	Q9Y261_P50219	Forkhead	Homeodomain
FOXA2_PITX1	Q9Y261_P78337	Forkhead	Homeodomain
FOXA2_ZFHX4	Q9Y261_Q86UP3	Forkhead	Homeodomain
FOXA2_SIX5	Q9Y261_Q8N196	Forkhead	Homeodomain
FOXA2_ISL2	Q9Y261_Q96A47	Forkhead	Homeodomain
FOXA2_NKX2-4	Q9Y261_Q9H2Z4	Forkhead	Homeodomain
FOXA2_SIX4	Q9Y261_Q9UIU6	Forkhead	Homeodomain
ZHX2_FOXK1	Q9Y6X8_P85037	Homeodomain	Forkhead
ZHX2_FOXC1	Q9Y6X8_Q12948	Homeodomain	Forkhead
ZHX2_FOXP1	Q9Y6X8_Q9H334	Homeodomain	Forkhead
ONECUT2_NACC1	O95948_Q96RE7	Homeodomain	BTB
HOXD12_KLHL21	P35452_Q9UJP4	Homeodomain	BTB
SATB2_ZBTB7A	Q9UPW6_O95365	Homeodomain	BTB
SATB2_ZBTB10	Q9UPW6_Q96DT7	Homeodomain	BTB
SATB2_ZBTB21	Q9UPW6_Q9ULJ3	Homeodomain	BTB
DPRX_SLX4	A6NFQ7_Q8IY92	Homeodomain	BTB
ZBTB7B_ZHX1	O15156_Q9UKY1	BTB	Homeodomain
HOXA2_KLHL7	O43364_Q8IXQ5	Homeodomain	BTB
HOXA2_ZBTB21	O43364_Q9ULJ3	Homeodomain	BTB
HOXA3_ZBTB39	O43365_O15060	Homeodomain	BTB
HOXA3_KLHL7	O43365_Q8IXQ5	Homeodomain	BTB
HOXA3_BACH2	O43365_Q9BYV9	Homeodomain	BTB
HOXA3_ZBTB40	O43365_Q9NUA8	Homeodomain	BTB
DLX3_ZBTB39	O60479_O15060	Homeodomain	BTB
DLX3_ZBTB33	O60479_Q86T24	Homeodomain	BTB
DLX3_ZBTB40	O60479_Q9NUA8	Homeodomain	BTB
DLX3_ZBTB4	O60479_Q9P1Z0	Homeodomain	BTB
ONECUT2_ZBTB43	O95948_O43298	Homeodomain	BTB
ONECUT2_ZBTB33	O95948_Q86T24	Homeodomain	BTB
ONECUT2_ZBTB34	O95948_Q8NCN2	Homeodomain	BTB
ONECUT2_NACC2	O95948_Q96BF6	Homeodomain	BTB
ONECUT2_ZBTB9	O95948_Q96C00	Homeodomain	BTB
ONECUT2_ZBTB10	O95948_Q96DT7	Homeodomain	BTB
ONECUT2_BACH2	O95948_Q9BYV9	Homeodomain	BTB
ONECUT2_ZBTB40	O95948_Q9NUA8	Homeodomain	BTB
HOXB2_ZBTB40	P14652_Q9NUA8	Homeodomain	BTB
POU2F1_SLX4	P14859_Q8IY92	Homeodomain	BTB
POU2F1_ZBTB40	P14859_Q9NUA8	Homeodomain	BTB
POU2F1_ZBTB4	P14859_Q9P1Z0	Homeodomain	BTB
HOXA5_ZBTB7A	P20719_O95365	Homeodomain	BTB
HOXA5_ZBTB33	P20719_Q86T24	Homeodomain	BTB
HOXA5_ZBTB40	P20719_Q9NUA8	Homeodomain	BTB
PAX6_ZBTB9	P26367_Q96C00	Homeodomain	BTB
PAX6_ZBTB10	P26367_Q96DT7	Homeodomain	BTB
HOXA10_ZBTB39	P31260_O15060	Homeodomain	BTB
HOXA10_ZBTB33	P31260_Q86T24	Homeodomain	BTB
HOXA10_ZBTB40	P31260_Q9NUA8	Homeodomain	BTB
HOXA9_KLHL7	P31269_Q8IXQ5	Homeodomain	BTB
HOXA9_ZBTB40	P31269_Q9NUA8	Homeodomain	BTB
HOXA11_KLHL7	P31270_Q8IXQ5	Homeodomain	BTB
HOXD12_ZBTB33	P35452_Q86T24	Homeodomain	BTB
HOXD12_ZBTB10	P35452_Q96DT7	Homeodomain	BTB
HOXD12_ZBTB3	P35452_Q9H5J0	Homeodomain	BTB
LHX1_ZBTB10	P48742_Q96DT7	Homeodomain	BTB
HOXA1_BACH2	P49639_Q9BYV9	Homeodomain	BTB
PDX1_ZBTB7A	P52945_O95365	Homeodomain	BTB
PDX1_ZBTB9	P52945_Q96C00	Homeodomain	BTB
PDX1_ZBTB10	P52945_Q96DT7	Homeodomain	BTB
PDX1_ZBTB40	P52945_Q9NUA8	Homeodomain	BTB
PDX1_ZBTB21	P52945_Q9ULJ3	Homeodomain	BTB
HOXA4_KLHL7	Q00056_Q8IXQ5	Homeodomain	BTB
SATB1_KLHL7	Q01826_Q8IXQ5	Homeodomain	BTB
SATB1_ZBTB10	Q01826_Q96DT7	Homeodomain	BTB
SATB1_ANKFY1	Q01826_Q9P2R3	Homeodomain	BTB
POU5F1_ZBTB40	Q01860_Q9NUA8	Homeodomain	BTB
HOXB13_ZBTB33	Q92826_Q86T24	Homeodomain	BTB
LHX6_ZBTB9	Q9UPM6_Q96C00	Homeodomain	BTB
SATB2_ZNF131	Q9UPW6_P52739	Homeodomain	BTB
SATB2_ZBTB33	Q9UPW6_Q86T24	Homeodomain	BTB
SATB2_ZBTB9	Q9UPW6_Q96C00	Homeodomain	BTB
SATB2_NACC1	Q9UPW6_Q96RE7	Homeodomain	BTB
SATB2_ZBTB40	Q9UPW6_Q9NUA8	Homeodomain	BTB
CRX_TEAD1	O43186_P28347	Homeodomain	TEA
HOXA3_TEAD1	O43365_P28347	Homeodomain	TEA
ONECUT2_TEAD1	O95948_P28347	Homeodomain	TEA
HOXA5_TEAD1	P20719_P28347	Homeodomain	TEA
TEAD1_HOXB9	P28347_P17482	TEA	Homeodomain
TEAD1_HOXA10	P28347_P31260	TEA	Homeodomain
TEAD1_CUX1	P28347_P39880	TEA	Homeodomain
TEAD1_SATB1	P28347_Q01826	TEA	Homeodomain
TEAD1_ZFHX3	P28347_Q15911	TEA	Homeodomain
TEAD1_ZFHX4	P28347_Q86UP3	TEA	Homeodomain
TEAD1_SATB2	P28347_Q9UPW6	TEA	Homeodomain
TEAD1_ZHX2	P28347_Q9Y6X8	TEA	Homeodomain
HOXA10_TEAD1	P31260_P28347	Homeodomain	TEA
HOXD12_TEAD1	P35452_P28347	Homeodomain	TEA
TEAD4_HMBOX1	Q15561_Q6NT76	TEA	Homeodomain
CRX_TEAD1	O43186_P28347	Homeodomain	YBD
HOXA3_TEAD1	O43365_P28347	Homeodomain	YBD
ONECUT2_TEAD1	O95948_P28347	Homeodomain	YBD
HOXA5_TEAD1	P20719_P28347	Homeodomain	YBD
TEAD1_HOXB9	P28347_P17482	YBD	Homeodomain
TEAD1_HOXA10	P28347_P31260	YBD	Homeodomain
TEAD1_CUX1	P28347_P39880	YBD	Homeodomain
TEAD1_SATB1	P28347_Q01826	YBD	Homeodomain
TEAD1_ZFHX3	P28347_Q15911	YBD	Homeodomain
TEAD1_ZFHX4	P28347_Q86UP3	YBD	Homeodomain
TEAD1_SATB2	P28347_Q9UPW6	YBD	Homeodomain
TEAD1_ZHX2	P28347_Q9Y6X8	YBD	Homeodomain
HOXA10_TEAD1	P31260_P28347	Homeodomain	YBD
HOXD12_TEAD1	P35452_P28347	Homeodomain	YBD
TEAD4_HMBOX1	Q15561_Q6NT76	YBD	Homeodomain
LEUTX_NFIB	A8MZ59_O00712	Homeodomain	CTF_NFI
LEUTX_NFIC	A8MZ59_P08651	Homeodomain	CTF_NFI
LEUTX_NFIA	A8MZ59_Q12857	Homeodomain	CTF_NFI
NFIB_CUX1	O00712_P39880	CTF_NFI	Homeodomain
NFIB_PITX1	O00712_P78337	CTF_NFI	Homeodomain
NFIB_ZFHX4	O00712_Q86UP3	CTF_NFI	Homeodomain
NFIB_NKX2-4	O00712_Q9H2Z4	CTF_NFI	Homeodomain
NFIB_SIX4	O00712_Q9UIU6	CTF_NFI	Homeodomain
NFIB_SATB2	O00712_Q9UPW6	CTF_NFI	Homeodomain
CRX_NFIC	O43186_P08651	Homeodomain	CTF_NFI
CRX_NFIA	O43186_Q12857	Homeodomain	CTF_NFI
HOXA2_NFIC	O43364_P08651	Homeodomain	CTF_NFI
HOXA3_NFIB	O43365_O00712	Homeodomain	CTF_NFI
HOXA3_NFIC	O43365_P08651	Homeodomain	CTF_NFI
HOXA3_NFIX	O43365_Q14938	Homeodomain	CTF_NFI
TLX3_NFIB	O43711_O00712	Homeodomain	CTF_NFI
TLX3_NFIC	O43711_P08651	Homeodomain	CTF_NFI
TLX3_NFIA	O43711_Q12857	Homeodomain	CTF_NFI
TLX2_NFIB	O43763_O00712	Homeodomain	CTF_NFI
TLX2_NFIA	O43763_Q12857	Homeodomain	CTF_NFI
DLX3_NFIB	O60479_O00712	Homeodomain	CTF_NFI
ONECUT2_NFIC	O95948_P08651	Homeodomain	CTF_NFI
NFIC_POU2F1	P08651_P14859	CTF_NFI	Homeodomain
NFIC_CUX1	P08651_P39880	CTF_NFI	Homeodomain
NFIC_PBX2	P08651_P40425	CTF_NFI	Homeodomain
NFIC_MNX1	P08651_P50219	CTF_NFI	Homeodomain
NFIC_PITX1	P08651_P78337	CTF_NFI	Homeodomain
NFIC_ZFHX4	P08651_Q86UP3	CTF_NFI	Homeodomain
NFIC_NKX2-4	P08651_Q9H2Z4	CTF_NFI	Homeodomain
NFIC_SIX4	P08651_Q9UIU6	CTF_NFI	Homeodomain
NFIC_ZHX1	P08651_Q9UKY1	CTF_NFI	Homeodomain
NFIC_SATB2	P08651_Q9UPW6	CTF_NFI	Homeodomain
HOXB2_NFIB	P14652_O00712	Homeodomain	CTF_NFI
HOXB2_NFIA	P14652_Q12857	Homeodomain	CTF_NFI
POU2F1_NFIB	P14859_O00712	Homeodomain	CTF_NFI
POU2F1_NFIC	P14859_P08651	Homeodomain	CTF_NFI
POU2F1_NFIA	P14859_Q12857	Homeodomain	CTF_NFI
HOXA5_NFIB	P20719_O00712	Homeodomain	CTF_NFI
HOXA5_NFIC	P20719_P08651	Homeodomain	CTF_NFI
HOXA5_NFIX	P20719_Q14938	Homeodomain	CTF_NFI
PAX7_NFIB	P23759_O00712	Homeodomain	CTF_NFI
PAX7_NFIC	P23759_P08651	Homeodomain	CTF_NFI
PAX7_NFIA	P23759_Q12857	Homeodomain	CTF_NFI
PAX6_NFIB	P26367_O00712	Homeodomain	CTF_NFI
PAX6_NFIA	P26367_Q12857	Homeodomain	CTF_NFI
HOXA10_NFIB	P31260_O00712	Homeodomain	CTF_NFI
HOXA10_NFIC	P31260_P08651	Homeodomain	CTF_NFI
HOXA10_NFIX	P31260_Q14938	Homeodomain	CTF_NFI
HOXA9_NFIB	P31269_O00712	Homeodomain	CTF_NFI
HOXA9_NFIC	P31269_P08651	Homeodomain	CTF_NFI
HOXA9_NFIX	P31269_Q14938	Homeodomain	CTF_NFI
TLX1_NFIB	P31314_O00712	Homeodomain	CTF_NFI
TLX1_NFIC	P31314_P08651	Homeodomain	CTF_NFI
TLX1_NFIA	P31314_Q12857	Homeodomain	CTF_NFI
OTX2_NFIA	P32243_Q12857	Homeodomain	CTF_NFI
HOXD12_NFIB	P35452_O00712	Homeodomain	CTF_NFI
HOXD12_NFIC	P35452_P08651	Homeodomain	CTF_NFI
HOXD12_NFIA	P35452_Q12857	Homeodomain	CTF_NFI
HOXD12_NFIX	P35452_Q14938	Homeodomain	CTF_NFI
LHX1_NFIB	P48742_O00712	Homeodomain	CTF_NFI
HOXA1_NFIB	P49639_O00712	Homeodomain	CTF_NFI
HOXA1_NFIC	P49639_P08651	Homeodomain	CTF_NFI
LHX2_NFIB	P50458_O00712	Homeodomain	CTF_NFI
LHX2_NFIA	P50458_Q12857	Homeodomain	CTF_NFI
PDX1_NFIB	P52945_O00712	Homeodomain	CTF_NFI
PDX1_NFIC	P52945_P08651	Homeodomain	CTF_NFI
GSC_NFIC	P56915_P08651	Homeodomain	CTF_NFI
GSC_NFIA	P56915_Q12857	Homeodomain	CTF_NFI
NFIA_HOXB9	Q12857_P17482	CTF_NFI	Homeodomain
NFIA_CUX1	Q12857_P39880	CTF_NFI	Homeodomain
NFIA_MNX1	Q12857_P50219	CTF_NFI	Homeodomain
NFIA_PITX1	Q12857_P78337	CTF_NFI	Homeodomain
NFIA_ZFHX3	Q12857_Q15911	CTF_NFI	Homeodomain
NFIA_ZFHX4	Q12857_Q86UP3	CTF_NFI	Homeodomain
NFIA_SIX4	Q12857_Q9UIU6	CTF_NFI	Homeodomain
NFIA_SATB2	Q12857_Q9UPW6	CTF_NFI	Homeodomain
NFIX_POU2F1	Q14938_P14859	CTF_NFI	Homeodomain
NFIX_CUX1	Q14938_P39880	CTF_NFI	Homeodomain
NFIX_ZFHX3	Q14938_Q15911	CTF_NFI	Homeodomain
NFIX_ZFHX4	Q14938_Q86UP3	CTF_NFI	Homeodomain
NFIX_SIX4	Q14938_Q9UIU6	CTF_NFI	Homeodomain
NFIX_SATB2	Q14938_Q9UPW6	CTF_NFI	Homeodomain
NFIX_ZHX2	Q14938_Q9Y6X8	CTF_NFI	Homeodomain
LHX4_NFIB	Q969G2_O00712	Homeodomain	CTF_NFI
LHX4_NFIA	Q969G2_Q12857	Homeodomain	CTF_NFI
PBX4_NFIB	Q9BYU1_O00712	Homeodomain	CTF_NFI
VSX1_NFIB	Q9NZR4_O00712	Homeodomain	CTF_NFI
VSX1_NFIA	Q9NZR4_Q12857	Homeodomain	CTF_NFI
LHX3_NFIA	Q9UBR4_Q12857	Homeodomain	CTF_NFI
DUX4_NFIB	Q9UBX2_O00712	Homeodomain	CTF_NFI
DUX4_NFIA	Q9UBX2_Q12857	Homeodomain	CTF_NFI
SATB2_NFIC	Q9UPW6_P08651	Homeodomain	CTF_NFI
SATB2_NFIA	Q9UPW6_Q12857	Homeodomain	CTF_NFI
ZHX2_NFIB	Q9Y6X8_O00712	Homeodomain	CTF_NFI
LEUTX_NFIB	A8MZ59_O00712	Homeodomain	NfI_DNAbd_pre-N
LEUTX_NFIC	A8MZ59_P08651	Homeodomain	NfI_DNAbd_pre-N
LEUTX_NFIA	A8MZ59_Q12857	Homeodomain	NfI_DNAbd_pre-N
NFIB_CUX1	O00712_P39880	NfI_DNAbd_pre-N	Homeodomain
NFIB_PITX1	O00712_P78337	NfI_DNAbd_pre-N	Homeodomain
NFIB_ZFHX4	O00712_Q86UP3	NfI_DNAbd_pre-N	Homeodomain
NFIB_NKX2-4	O00712_Q9H2Z4	NfI_DNAbd_pre-N	Homeodomain
NFIB_SIX4	O00712_Q9UIU6	NfI_DNAbd_pre-N	Homeodomain
NFIB_SATB2	O00712_Q9UPW6	NfI_DNAbd_pre-N	Homeodomain
CRX_NFIC	O43186_P08651	Homeodomain	NfI_DNAbd_pre-N
[truncated: 11,121 more rows]
