# Supplementary material
Source: Research Square preprint supplement (doi:10.21203/rs.3.rs-8894562/v1)
Supplement: Supplementary file 4 [file 4d244a92e8fd57fa97b4383f.xlsx]

## Sheet: 216 TF info
ID	TF name	DBD Type	ChIP-seq	PPI	ChIP-seq peak number	APMS	BioID
1	ALX4	Homeodomain	Y	Y	62	54	25
2	ARGFX	Homeodomain	Y	Y	25978	0	9
3	ARID5B	ARID/BRIGHT	Y	Y	9938	42	240
4	BAZ2A	MBD; AT hook	Y	ND	6001
5	BHLHA15	bHLH	Y	Y	7479	84	208
6	CEBPD	bZIP	Y	Y	581	13	0
7	CEBPG	bZIP	Y	Y	30433	13	142
8	CPEB1	Unknown	ND	Y		65	72
9	CPHXL	Homeodomain	Y	Y	56049	95	237
10	CPHXL2	Homeodomain	Y	Y	15706	11	41
11	CREB1	bZIP	Y	Y	6615	2	0
12	CRX	Homeodomain	Y	Y	80422	0	143
13	DLX3	Homeodomain	Y	Y	4292	83	250
14	DPRX	Homeodomain	Y	Y	65118	0	15
15	DUX4	Homeodomain	Y	Y	10441	20	114
16	DUXA	Homeodomain	Y	Y	30555	0	11
17	DUXB	Homeodomain	Y	Y	21837	1	14
18	E2F1	E2F	Y	Y	106612	1	18
19	E2F3	E2F	Y	Y	6563	55	237
20	EGR2	C2H2 ZF	Y	Y	91662	4	135
21	EGR3	C2H2 ZF	Y	ND	498
22	EHF	Ets	Y	Y	18351	2	90
23	ELF1	Ets	Y	Y	18619	76	292
24	ELF2	Ets	Y	Y	26329	46	270
25	ELF3	Ets; AT hook	Y	Y	39152	78	237
26	ELF4	Ets	Y	Y	45719	10	94
27	ELF5	Ets	Y	Y	18450	3	33
28	ELK1	Ets	Y	Y	62088	6	77
29	ELK3	Ets	Y	Y	56828	6	101
30	ELK4	Ets	Y	Y	110723	2	1
31	ERF	Ets	Y	Y	21101	6	44
32	ERG	Ets	Y	Y	59945	3	98
33	ESR1	Nuclear receptor	Y	Y	18179	0	5
34	ETS1	Ets	Y	Y	6000	2	42
35	ETS2	Ets	Y	Y	36372	27	30
36	ETV1	Ets	Y	Y	86426	4	60
37	ETV2	Ets	Y	Y	55530	3	186
38	ETV3	Ets	Y	Y	47465	6	66
39	ETV3L	Ets	Y	Y	478	46	69
40	ETV4	Ets	Y	Y	51715	9	42
41	ETV5	Ets	Y	Y	42618	0	6
42	ETV6	Ets	Y	Y	59	68	257
43	ETV7	Ets	Y	Y	94468	3	17
44	FEV	Ets	Y	Y	40524	4	197
45	FIGLA	bHLH	Y	Y	15986	26	35
46	FLI1	Ets	Y	Y	38020	6	217
47	FOS	bZIP	Y	Y	25826	15	93
48	FOXA1	Forkhead	Y	Y	5721	66	228
49	FOXA2	Forkhead	ND	Y		69	246
50	FOXA3	Forkhead	Y	Y	12473	32	247
51	FOXI1	Forkhead	Y	Y	52207	0	54
52	FOXJ2	Forkhead	Y	Y	49739	13	229
53	FOXJ3	Forkhead	Y	Y	3146	18	164
54	FOXL1	Forkhead	Y	Y	62405	0	84
55	FOXO1	Forkhead	Y	Y	2470	8	203
56	FOXP1	Forkhead	ND	Y		59	180
57	FOXQ1	Forkhead	Y	Y	50276	5	35
58	GABPA	Ets	Y	Y	8143	3	159
59	GABPB1	Unknown	Y	Y	51	24	226
60	GATA1	GATA	Y	Y	4223	3	56
61	GATA2	GATA	Y	Y	15927	18	116
62	GATA3	GATA	Y	Y	55944	86	303
63	GATA4	GATA	Y	Y	21362	34	0
64	GCM1	GCM	Y	Y	67052	3	54
65	GCM2	GCM	Y	Y	77	68	110
66	GLI2	C2H2 ZF	Y	Y	53102	15	91
67	GLI3	C2H2 ZF	ND	Y		7	60
68	GLI3-CL	C2H2 ZF	Y	Y	48642
69	GLI3-FL	C2H2 ZF	Y	ND	18686
70	GPBP1L1	Unknown	Y	Y	62	73	219
71	GSC	Homeodomain	ND	Y		0	72
72	HES7	bHLH	Y	Y	244	44	181
73	HNF1A	Homeodomain	Y	Y	8194	3	19
74	HNF1B	Homeodomain	Y	Y	22005	2	125
75	HNF4A	Nuclear receptor	Y	Y	33533	0	194
76	HOXA1	Homeodomain	Y	Y	4907	86	236
77	HOXA10	Homeodomain	Y	Y	24063	26	200
78	HOXA11	Homeodomain	Y	Y	27451	21	201
79	HOXA13	Homeodomain	Y	Y	6029	31	0
80	HOXA2	Homeodomain	Y	Y	16616	6	223
81	HOXA3	Homeodomain	Y	Y	14634	70	253
82	HOXA4	Homeodomain	Y	Y	4443	53	246
83	HOXA5	Homeodomain	Y	Y	5970	10	254
84	HOXA9	Homeodomain	Y	Y	15194	21	192
85	HOXB13	Homeodomain	Y	Y	22847	34	0
86	HOXB2	Homeodomain	Y	Y	29788	26	232
87	HOXD12	Homeodomain	Y	Y	26495	20	205
88	HSF1	HSF	Y	Y	50	50	190
89	HSF4	HSF	Y	Y	723	85	159
90	IRF1	IRF	Y	Y	53610	1	19
91	IRF3	IRF	Y	Y	54458	4	0
92	IRF4	IRF	Y	Y	40085	1	47
93	IRF5	IRF	Y	Y	63398	4	6
94	IRF8	IRF	Y	Y	43977	6	24
95	IRF9	IRF	Y	Y	59194	0	3
96	ISX	Homeodomain	Y	Y	24172	1	16
97	JAZF1	C2H2 ZF	Y	Y	8222	62	226
98	KLF10	C2H2 ZF	Y	Y	64772	7	10
99	KLF12	C2H2 ZF	Y	Y	62101	21	142
100	KLF15	C2H2 ZF	Y	Y	71854	159	103
101	KLF16	C2H2 ZF	Y	Y	62272	307	156
102	KLF3	C2H2 ZF	Y	Y	64006	38	217
103	KLF4	C2H2 ZF	Y	Y	75463	103	23
104	KLF5	C2H2 ZF	Y	Y	67226	51	101
105	KLF6	C2H2 ZF	Y	Y	29256	7	65
106	KLF8	C2H2 ZF	Y	Y	9776	204	158
107	KLF9	C2H2 ZF	Y	Y	51339	10	79
108	LEUTX	Homeodomain	Y	Y	5832	1	119
109	LHX1	Homeodomain	Y	Y	10137	7	84
110	LHX2	Homeodomain	Y	Y	4436	3	148
111	LHX3	Homeodomain	Y	Y	61739	2	85
112	LHX4	Homeodomain	Y	Y	33098	4	95
113	LHX6	Homeodomain	Y	Y	23293	4	21
114	LHX8	Homeodomain	Y	Y	414	1	21
115	MAX	bHLH	Y	Y	99768	50	175
116	MEF2A	MADS box	Y	Y	99581	0	3
117	MYB	Myb/SANT	Y	Y	11930	0	65
118	MYC	bHLH	Y	Y	10866	3	111
119	MYOD1	bHLH	Y	Y	98377	1	96
120	MYSM1	Myb/SANT	Y	Y	79	85	233
121	NFATC3	Rel	Y	Y	21761	5	3
122	NFATC4	Rel	Y	Y	26573	2	18
123	NFIA	SMAD	Y	Y	34378	65	234
124	NFIB	SMAD	Y	Y	24961	67	262
125	NFIC	SMAD	Y	Y	36667	54	271
126	NFIX	SMAD	Y	Y	47209	79	280
127	NFKB1	Rel	Y	Y	97504	2	8
128	NFYA	CBF/NF-Y	Y	ND	86
129	NFYC	Unknown	Y	Y	10707	2	53
130	NKX2-5	Homeodomain	Y	Y	33943	47	0
131	NR2F6	Nuclear receptor	Y	Y	211	30	75
132	ONECUT2	CUT; Homeodomain	ND	Y		64	226
133	OTX1	Homeodomain	ND	Y		2	47
134	OTX2	Homeodomain	Y	Y	6428	0	77
135	PAX2	Homeodomain; Paired box	Y	Y	89931	1	51
136	PAX6	Homeodomain; Paired box	Y	Y	29275	1	185
137	PAX7	Homeodomain; Paired box	Y	Y	76274	6	103
138	PAX8	Paired box	Y	Y	11465	13	96
139	PAX9	Paired box	Y	Y	122429	1	104
140	PBX4	Homeodomain	Y	Y	1446	57	200
141	PDX1	Homeodomain	Y	Y	87739	80	281
142	PITX1	Homeodomain	Y	Y	2324	2	39
143	PITX2	Homeodomain	ND	Y		4	28
144	POU2F1	Homeodomain; POU	Y	Y	3213	14	227
145	POU5F1	Homeodomain; POU	Y	Y	6491	83	190
146	PPARG	Nuclear receptor	Y	Y	2018	0	41
147	PRDM1	C2H2 ZF	Y	Y	27674	6	33
148	RFX1	RFX	Y	Y	1634	41	229
149	RFX2	RFX	Y	Y	1845	78	197
150	RFX3	RFX	Y	Y	33661	71	194
151	RFX4	RFX	Y	Y	21382	51	192
152	RFX5	RFX	Y	Y	10936	18	239
153	RFX6	RFX	Y	Y	20301	15	163
154	RFX7	RFX	ND	Y		41	0
155	RFX8	RFX	Y	Y	776	51	245
156	RREB1	C2H2 ZF	Y	Y	89996	0	3
157	RXRA	Nuclear receptor	Y	Y	4397	1	0
158	SATB1	CUT; Homeodomain	Y	Y	40448	3	243
159	SATB2	CUT; Homeodomain	Y	Y	36760	159	161
160	SIX4	Homeodomain	Y	Y	359	71	175
161	SIX5	Homeodomain	Y	Y	76	74	168
162	SKIL	Unknown	Y	ND	25001
163	SMAD1	SMAD	Y	Y	24598	77	213
164	SMAD5	SMAD	Y	Y	28513	0	9
165	SOX10	HMG/Sox	Y	Y	46247	0	42
166	SOX15	HMG/Sox	Y	Y	63778	37	81
167	SOX17	HMG/Sox	Y	Y	56240	0	78
168	SOX2	HMG/Sox	Y	Y	13639	35	184
169	SOX4	HMG/Sox	Y	Y	35882	4	27
170	SOX5	HMG/Sox	Y	Y	74172	46	67
171	SOX6	HMG/Sox	Y	Y	61708	63	100
172	SOX9	HMG/Sox	Y	Y	49607	0	45
173	SP1	C2H2 ZF	Y	Y	49154	53	2
174	SP7	C2H2 ZF	Y	Y	32716	28	275
175	SPDEF	Ets	Y	Y	22115	8	17
176	SPI1	Ets	Y	Y	46653	12	194
177	SPIB	Ets	Y	Y	54736	90	327
178	SPIC	Ets	Y	Y	37661	15	193
179	SPZ1	Unknown	Y	Y	45485	1	10
180	STAT1	STAT	Y	Y	8187	1	24
181	STAT3	STAT	Y	Y	44453	8	28
182	STAT4	STAT	Y	Y	22299	3	20
183	STAT5A	STAT	Y	Y	19715	5	0
184	STAT5B	STAT	Y	Y	67593	16	2
185	TAL1	bHLH	ND	Y		40	10
186	TBR1	T-box	Y	Y	4313	0	78
187	TBX21	T-box	Y	Y	92351	12	181
188	TBXT	T-box	Y	Y	43334	2	111
189	TCF3	bHLH	Y	Y	8313	35	237
190	TEAD1	TEA	Y	Y	129073	69	334
191	TEAD2	TEA	Y	Y	92033	75	162
192	TEAD3	TEA	Y	Y	31826	38	274
193	TEAD4	TEA	Y	Y	43882	17	0
194	TFAP2A	AP-2	Y	Y	53334	74	201
195	TFAP2C	AP-2	Y	Y	6424	6	0
196	TFAP4	bHLH	Y	Y	1589	12	204
197	TLX1	Homeodomain	Y	Y	99860	65	120
198	TLX2	Homeodomain	Y	Y	115594	39	101
199	TLX3	Homeodomain	Y	Y	51496	14	146
200	TP53	p53	ND	Y		40	6
201	TPRX1	Homeodomain	Y	Y	33065	1	187
202	TPRX2	Homeodomain	Y	Y	32360	52	19
203	USF1	bHLH	Y	Y	13019	15	187
204	VSX1	Homeodomain	Y	Y	23715	9	46
205	XBP1	bZIP	Y	ND	10877
206	YY1	C2H2 ZF	Y	Y	10074	6	119
207	ZBTB1	C2H2 ZF	Y	Y	101	21	243
208	ZBTB33	C2H2 ZF	Y	Y	43	60	227
209	ZBTB38	C2H2 ZF	Y	Y	65	0	232
210	ZBTB7B	C2H2 ZF	Y	Y	3724	47	207
211	ZBTB9	C2H2 ZF	Y	Y	104	16	148
212	ZGPAT	CCCH ZF	Y	Y	544	54	246
213	ZHX2	Homeodomain	Y	Y	2473	8	208
214	ZIC3	C2H2 ZF	Y	Y	131094	17	0
215	ZNF200	C2H2 ZF	Y	Y	62739	17	37
216	ZNF263	C2H2 ZF	Y	Y	89201	3	16
217	ZNF808	C2H2 ZF	Y	Y	56082	86	323
218	ZSCAN4	C2H2 ZF	ND	Y		0	43
Y: Yes
ND: Not Done
