# Supplementary material
Source: Research Square preprint supplement (doi:10.21203/rs.3.rs-8894562/v1)
Supplement: Supplementary file 5 [file 7e61e86568a84d1998827338.xlsx]

## Sheet: Community info
community1	community2	community3	community4	community5	community6	community7	community8	community9	community10	community11	community12	community13	community14	community15	community16	community17	community18	community19	community20	community21	community22	community23	community24	community25	community26	community27	community28	community29	community30	community31	community32	community33	community34	community35	community36	community37	community38	community39	community40	community41	community42	community43	community44	community45	community46	community47	community48	community49	community50
GATA2	H3C1	TLX2	SREK1IP1	PPP1R12A	POLD1	TEAD1	POLDIP2	LRP1	PLK1	VAPA	MED8	LSM14B	SATB2	MED10	RFX5	PARD3	WTAP	DUXB	SLC25A19	PXMP4	TLX3	LEUTX	E2F3	SPEN	MED17	LORICRIN	H4C1	JMJD1C	TRRAP	KLF3	NMT1	DUX4	USP7	PAFAH1B2	TAF5	ANK3	TOP3A	HOXA3	PDPR	CLEC14A	H1-2	ENSA	BAG2	IDH3G	ZBTB7B	MAX	STK24	DIMT1	LTA4H
CPHXL2	MED25	SOX15	PRPF38A	COIL	NBR1	SLIT2	IRS4	LYRM7	LGALS3BP	HIP1	NFIB	IGF2BP3	MED16	TBR1	ENKD1	ABLIM1	CRX	LUZP1	FLYWCH2	ZBTB33	DDX5	YEATS2	DNAJC6	POU2F1	MED24	IGG1	H1-4	ETV2	HADHA	KLF12	CPS1	SF3B6	CPHXL	MRPS17	TAF2	ANXA6	ANXA5	ACOT7	TMLHE	HSPA4L	ACTBL2	MRPL32	TP53	RFX8	LGALS7	WDR3	LSM3	DDB1	OTUB1
HSPD1	MED27	RPL9	FAM89A	MPRIP	SIPA1L2	POLR1A	ENTR1	AGK	SEC24B	HIP1R	RRP9	HNRNPR	CWF19L2	TCEAL1	GLO1	LRCH2	HOXB2	ZNF263	ASNS	TFAP2A	XRN2	CHD8	PCK2	DAD1	MED15	APOA1	RPS28	RBMS1	MYC	ZSCAN4	DLX3	H3Y2	UBR5	GGCT	SP2	NOP56	ALDH5A1	CLIC1	MDH1	EFTUD2	ZIC3	CSTPP1	CUL7	IVD	BDP1	ADD2	ZGPAT	DET1	MRPS11
RRM2B	MED12	TLX1	B3GALT6	TAOK1	AURKA	POLR1D	LTV1	MT-CO2	DNAJC7	TWF2	NFIC	SYNCRIP	ALDH1A2	GPS2	MRPL47	DOCK7	KIF14	SCAND1	MRPS28	ARPC3	KHSRP	RB1	APPL2	DLAT	MED14	ALX4	XRCC6	SLC25A10	FBXW7	UCHL1	DPYSL4	MED1	MOCS3	TIMM9	MORF4L1	MAGOH	HNRNPC	TBCA	TFAP4	IMP3	MYH9	GTPBP6	RAD50	GATD1	DGAT1	CBX5	CCDC86	STK40	SRM
AGRN	ASH2L	H2AC4	SLK	RP9	ARRB2	COL18A1	USP16	YWHAZ	BAG5	OGDH	BUD31	PABPC1	CMTR1	EGR2	RFXAP	THG1L	RUVBL2	KIAA1671	IDH2	ACTN4	PPP6C	DUXA	DNAH5	CENPF	MED23	SPRR1A	HAL	ACTL6A	EP400	ME2	FDXR	RBM33	TRIM27	PPP6R3	CAMSAP1	MYO19	RBMX	APRT	NUBPL	HSF1	MYH10	ZBTB1	HSPA2	MIB2	GLCE	MXI1	MTFR1L	COP1	SATB1
DKC1	SMARCD1	SOX6	TAOK3	CORO2A	LLGL1	PLCB3	GTPBP1	STUB1	RANBP9	MAPK1	NFIA	YBX3	DPYSL5	CDH1	RFXANK	ACTR10	RUVBL1	PML	VPS25	WDR1	TPRX2	TFDP1	TANC2	TPRX1	PEPD	DSG1	SRRM2	IRF1	H2BC11	RPL26	ALDH1B1	STEEP1	GNAZ	HSD17B11	GABPA	PRKDC	ZNF326	FH	ARID5B	ECD	FOS	CHAF1B	TUBB4A	TMEM126A	A2M	MXD1	TROAP	ETS2	TMED5
RPS17	ARID3B	SOX2	MPHOSPH10	AP2M1	CPT1A	PTPN13	KIN	ERLIN2	TRAF2	LIG3	SND1	RPL17	TBPL1	CDH2	SMAP1	REPS1	RPA1	TTF2	MRS2	FLNB	HDAC1	BAZ1A	SUCLG1	FEV	GLUL	DSC1	ARHGDIA	SPI1	YEATS4	FAU	VARS2	PNP	MDK	XPOT	EFHC2	ABCD3	CRYZ	ESD	USF1	ADH5	JUN	UBE2V2	SLC25A5	RAB3GAP2	C3	MXD4	CBX6	SLC25A17	RAB11B
ESRRA	ARID3A	KLF16	RRP8	EFHD1	PPP1R7	PLCB4	DDX54	NDUFB10	SHKBP1	KCTD10	PARS2	RPS19	AQR	ERG	FRMD8P1	PIK3R2	SUPT16H	ZMYM3	ZSCAN18	ACTN1	RBM25	OGT	GPI	GPATCH8	UBE2L3	PKP1	PRDM1	GCC2	KAT14	MRPS22	CHRAC1	FUS	TARS1	RPN1	GABPB2	SYNE2	ACTR3	FDPS	HOXD12	HSF2	NPM1	LIG1	SLC25A6	SCPEP1	IGKC	MAP4K1	OGFOD3	TACC2	MCU
NID1	ARID1A	SMN1	SIPA1L3	PPP1R12C	VWA8	POLR1F	DAB2	CAVIN1	ETV6	VRK1	PPWD1	RPS24	WRNIP1	MYOD1	IK	TRIOBP	APOE	CEP41	RFX2	ACTR2	CSNK2B	YY1	GATD3B	KMT2A	MOCS2	PIP	TIMM10	FLI1	DMAP1	MRPS25	CDV3	NOSIP	GALC	GALK1	RPS6KA1	BCAP31	HBB	AKR1B1	KLHL21	EAPP	JUNB	GOLPH3	TCP1	TRIP12	FGA	MNT	ZNF385A	ALDH3A2	CSK
EIF2S2	SMARCB1	YTHDF3	CEBPZ	DDX47	PATJ	GPATCH4	BHLHA15	COMT	LRP4	ERF	WDR89	YBX1	GTF2E1	PAX7	THAP12	DAPK1	RPA2	ZBTB9	MAP2K7	SSRP1	PPARG	YY2	TEAD3	BCORL1	CHAMP1	GYS1	TIMM29	RECQL	H2AZ1	RPL29	ONECUT2	DDX17	SNU13	ETV3L	KANSL2	HES7	RMI1	ECHS1	TDRKH	PRPF8	JUND	GSTK1	DNAJA1	SLC25A12	TF	TBRG1	MAPK8IP3	TBL3	NDUFS7
FXR2	SMARCA4	PSMD1	DDX10	UNC45A	FEM1B	NKAPD1	FBL	NOMO2	LRP5	MAPK3	ITCH	ILF2	POLR3A	CTTN	ORC5	SORBS1	ASPRV1	IPO7	CAND2	TWF1	SORL1	TFPT	MRI1	MLLT10	DNAJC10	FABP5	HNRNPL	SPIC	MBTD1	CTBP2	GTPBP10	NXF1	RRP1	TPP1	KDM5A	FMR1	RFLNB	PEBP1	PITX1	STING1	RPL35A	RINL	STIP1	NAPG	IVL	SGO2	LSM5	ASPH	TMEM43
NEXN	SMARCC2	AKAP8L	TUT7	RAI14	EIF3H	RBFA	RPS26	UCHL5	LRP6	ETV1	WDR12	ILF3	PUS7	HNRNPM	BRIP1	TFCP2	POF1B	PCLAF	SGPL1	FLII	ETV4	INO80D	MTG2	BICRA	HOXA1	ALDH2	SEC13	GCSH	EPC2	GLUD1	SEC24D	SPDL1	FRG1	PPM1F	ZNF592	ABRACL	H2BC12	PPIF	S100A8	COA5	TRIB1	PPP2R5C	CCT6A	L2HGDH	IGLC6	RADX	MCM10	PWP2	MT-ATP8
TRAF7	SMARCC1	PPIL2	ZNF460	SNX9	HERC1	NKAP	RPL39	TFRC	RPS6KB1	POU5F1	RLIM	PABPC4	KNL1	PAX6	DSN1	INA	ETS1	SZRD1	ACADSB	PLEC	SUGP1	NFRKB	FASN	MBD6	CAPZA2	S100A9	SRSF3	MRPL58	KAT5	MYB	GFM2	SENP6	FAM133B	RNASEL	KAT8	SUN1	SMARCAL1	ADSS2	SLURP1	ZDHHC13	DDA1	SLC35E1	CCT5	SMPD4	JAK1	MBD4	CAPN15	RPL7L1	ANXA7
PTPMT1	EP300	KLF4	ZNF771	PLEKHG3	NUP107	NGDN	LBR	HPS6	PCSK6	PEX12	PNKP	LARP1	UIMC1	MSH2	ORC3	KPNA3	RRS1	PALLD	AFF3	AMOT	PBX1	INO80C	NAMPT	ZNF362	ARPC5	S100A7	HNRNPUL2	TRIM25	BRD8	OTX1	NACC1	MED20	NOM1	PON2	CEP97	LLPH	RALY	ADSL	GFM1	NCDN	LIPT1	SRP54	CCT3	RAB4A	TRAM1	MSL1	GRK6	WDR36	RFC4
EFHD2	CREBBP	DHX15	ZNF808	PIK3C2A	APC	FMNL2	NUDT19	FOXO1	PHKA2	ZNF185	PAXX	ZC3HAV1	RBBP7	HNF1B	KPNA6	SMAD1	MAK16	EMC6	TMED1	SPECC1L	LENG8	INO80E	TARS2	ATF3	IDE	CASP14	SSBP3	PITX2	EPC1	PDIA4	ZC3H7B	RBBP6	PDCD10	CDC37	ZNF143	PPAN	PPHLN1	HIBADH	MGME1	DNAJB4	CASP12	ABHD12	CCT8	INPPL1	KNOP1	REV3L	RAP1GAP	BRI3BP	INPP1
PKP4	ATAD3A	MRPS14	MTPAP	GIPC1	MCRS1	CEP89	NOL10	RCCD1	TRAF3	ANKRD54	HOXA2	UPF1	SBNO1	GFPT2	CLTC	EPN2	SOX9	ZMYM2	OXA1L	PAWR	SP7	INO80B	STXBP3	PHC1	CRK	POLR1C	ESR1	LHX3	MEAF6	ELK3	ODC1	ESS2	EPB41L4B	ZNG1F	PRKAR1A	MPC2	ZNF200	ATIC	EBF3	ZNHIT2	ELK4	SBF1	CCT4	TIMM17B	RSBN1	DHRS2	RIDA	MYBBP1A	GSK3A
CPVL	AHCYL1	RSL1D1	TBL2	PPP1R12B	CEP290	UTP14A	TMED10	YWHAQ	BIRC2	CMAS	ERBIN	IGF2BP1	CDK2AP1	TIMM8A	HUWE1	RHEB	ANXA1	WASF2	ODR4	PPP1R9B	TIMM50	ACTR8	ERAL1	KDM1B	CAPZB	FLG	ITM2B	HAX1	ING3	DNPH1	TBX1	PPIL3	ACTL8	CDC42BPG	PYGB	WDR43	TASOR2	S100A11	MED31	AAR2	ACTB	GXYLT1	RPL11	PTCD1	MARK2	ARL6IP1	MAPK6	TMEM109	RAB13
MOV10	NBN	SSB	MRPS35	TOM1	WDR6	UACA	BCKDK	YWHAB	DCAF8	ARHGEF40	CPNE3	IGF2BP2	SYNJ1	PAX9	UBXN7	CNNM2	AHCTF1	VCPIP1	LETMD1	SH3BGRL3	CPSF1	INO80	GOT2	KAT6A	NXN	FLG2	XRCC5	ATP5MG	TAF9B	ATP1A1	MAMLD1	KIF23	ESRP2	WDR59	PRKACB	BMS1	H3C15	TALDO1	ZBED4	SQOR	STAT1	VPS13C	CCT2	MAP2K4	S100A14	BRD3	SNX30	HYOU1	DYNLT3
KIF2A	BRD9	RPS2	MRPS34	TOM1L2	DNMBP	POLR1E	PATL1	DNA2	CNNM4	CCDC127	POLG	CCAR2	ZFC3H1	SOX10	CENPH	ADD3	LHX4	ZNF451	ATG9A	HOMER3	SOX17	HNF4A	AKT1	E2F7	FAM83H	CAT	GATA4	KDM4B	TAF5L	APP	GATA6	CCDC174	EPB41L5	RHOT2	TAF4B	MRPS36	TMEM263	ANP32A	HDAC4	MED11	CALM2	GBF1	MDM2	GNB1	HELLS	ICE2	GCC1	WDR76	UBE2E1
CLTB	HMGXB4	RPS3	MRPS9	LRRC47	EXOG	GLIPR2	ZNF598	YWHAG	RANBP10	KCTD3	XPC	HNRNPA3	OGA	GSC	PCIF1	LEMD3	DDX18	GMDS	TMED4	CORO1C	RPRD2	E2F1	DNM2	ZBTB4	EPM2AIP1	ARG1	PCCA	SNUPN	KLF6	HSP90B1	BACH2	RACGAP1	DDX41	PASK	ASXL1	UTP15	GRN	ALDH9A1	RCOR2	PHKG2	ACTC1	UBE4A	CUL9	AKAP17A	NUFIP1	ANKRD11	SEPTIN5	RAB18	CASZ1
BASP1	PDCD11	RPS12	MRPS27	KIFBP	ZMYM1	POLR1B	DLG3	YWHAE	UHMK1	SPIB	LZTS2	HNRNPA2B1	N4BP1	MSH3	KIFC1	PPP5C	FOXJ2	GNG5	NOP9	PACSIN2	ZNF318	TFDP2	VAV2	HOXD11	ZER1	LYZ	PCCB	DLX6	ATXN7L3	CALR	NCS1	TPX2	PNMA2	SUCLA2	RCC1	UTP4	HCFC1	PGD	CRTC3	ABCC1	RFX7	GAPVD1	CDKN2A	VAC14	EXO1	MSL3	CCDC77	RAB21	PDXP
DHX29	REXO4	RPL10	MRPS24	STAMBPL1	MICOS13	ZCCHC17	OTUD4	YWHAH	PHKB	ALDH18A1	HOXA5	HNRNPH1	RPS6KA5	PAX2	SAC3D1	MPP7	ELF5	MON2	ARPC1A	CFL2	SCAF8	SLC25A11	PRPSAP1	MLLT6	DNASE2B	BLMH	XRCC1	TAF13	TANGO6	PDIA3	MIER1	CDK1	AGTPBP1	DICER1	RRM2	CYC1	TRA2A	GSTO1	BTRC	HSPA13	ANKRA2	ERCC6L	ACO2	STIM1	NVL	RNF169	TUT1	PRSS2	TMX3
GPSM1	RPF2	RPL35	PTCD3	SIPA1	UGGT2	PLCB1	ISG20L2	TRABD	GTPBP3	RFLNA	PHF8	PRRC2A	MED6	FOXI1	BRCA1	API5	SRCAP	PTPN12	AIFM2	ZNF780B	HOXC11	ELF4	SKIC3	PHC3	ZYG11B	KPLCE	RPA3	CCDC47	USP22	CLPP	IRX3	ZMAT2	NCKAP1	NUBP2	BLTP3B	SCAMP1	TUT4	TTLL12	ATP6AP1	EPHA4	CFL1	RALGAPB	CCT7	SCYL3	ZNF77	UHRF2	NOL6	ARHGDIB	XPNPEP1
RBM12B	MPDZ	NOP2	MRPS26	TOLLIP	MAP4K4	NHP2	QPCTL	F11R	RSPRY1	RAB7A	LIG4	HNRNPK	WDHD1	IRF4	ACADVL	NUP98	KDELR2	MOSPD2	DESI2	TFAP2C	MBNL1	NT5C2	FASTKD5	NSD1	NIF3L1	HOXA13	ECH1	ACTR6	SUPT7L	IRF9	CUX2	HAT1	FOXA1	DDOST	PHF20L1	DNAJC13	H1-0	HADH	CDT1	TBCEL	IRF3	PIK3C3	CCDC8	SPAG5	NOL8	ZNF518B	CAMSAP3	ATP1B3	SEC23IP
SARS2	DCTN5	RPL27A	MRPL15	NCKIPSD	IRS2	AATF	MAGED1	MRPL28	KLHL15	HSD17B12	VRK3	HNRNPAB	RPP40	FOXQ1	DLGAP5	PDZD11	ZNF292	PTRH2	LRRC1	SPCS3	DAZAP1	ADNP	PTGR3	TBX3	CNPY2	TGM3	HAGH	ABCB10	KAT2B	RPL28	ZBTB43	ANLN	PLOD1	FAF2	DIAPH1	G6PD	HCFC2	FBXO22	COQ6	DYM	DYRK1A	IFT140	PEX14	VAMP8	C6orf120	SCAF1	PNMA3
UTP18	ZNF24	RPS5	MRPS7	PACSIN3	CDH3	FARP1	H3-5	RHOT1	WDR26	EHF	MC1R	PRRC2C	ZBTB7A	TIMM8B	ZNF507	ARMC1	ZNF518A	IPO8	INTS2	TMEM167A	DCD	CXXC1	NELFB	CBX8	FBXO7	DSC3	MCCC1	TDP1	PFDN4	ZHX3	EOMES	CACTIN	FOXL1	ACSL3	CLASP2	CTPS1	MPHOSPH8	GNPNAT1	KDM6B	ORMDL3	MYL12A	LNPK	HSD17B4	RIC8A	FHOD1	CORO1A
LRRFIP2	ZMYM4	RPS10	MRPS2	EPN1	METTL15	KPNA4	DNAH10	DPM1	KLHL9	PAM16	UBTF	YTHDF2	TTLL1	GCM1	QRICH1	LAMTOR2	CDCA2	SAR1A	ATP13A2	EIF3J	FILIP1L	ZMYND8	COQ8B	CBX4	FOXA3	CDSN	PAX8	AP3B1	TADA3	MRPL49	TFEB	KRT5	PFDN1	RBM42	ARHGEF5	POLR2J	DYNLL1	TXNDC17	ZNF618	THAP6	LASP1	PTPN23	TP53BP2	SPCS1
CENPV	SORT1	RPL14	MRPS16	ARPC1B	TMEM201	STAMBP	MAGED2	CYB5R3	NYNRIN	SIX4	HOXA10	MCRIP2	GTF2F2	PABPC1L	CETN3	NISCH	TADA2A	GTSE1	CGGBP1	ABI1	SERPINH1	SMARCA5	TRMT2B	BMAL1	SETDB1	PRR4	CIT	HIVEP2	TAF12	MRPL2	DLST	KRT14	RTN3	LPCAT1	PPRC1	POLN	CENPC	ANP32E	RNF220	ZNF597	ANXA2	VPS45
LMO7	UBE2M	DAP3	MRPS23	BANF1	SPHK2	METAP1	TMED9	ATP5PB	EPDR1	MAP1LC3B2	HERC2	HNRNPA0	CDK11B	TBX21	KPNA1	NUP62	CMPK1	ANKRD13A	INTS6	KCTD15	TCERG1	MDC1	TBCD	AKR7A2	VIRMA	ECM1	CKB	RFC3	TADA2B	B3GALNT2	SOX8	CDK2	NUBP1	RDH10	ZBTB2	WDR75	MECP2	OLA1	NOXA1	MRPL57	MSN
BMP2K	ZBTB40	RPS20	ERCC2	AP2A2	CEP350	PRPF4B	FBXO3	SFXN1	STAT4	NLRC3	PDCL	ANKRD17	GTF2E2	XPNPEP3	CUL1	NAAA	NAA50	XRN1	SLC7A11	PPIP5K2	CD2BP2	TOP2A	DDX28	ATF2	ZHX2	SBSN	APLP2	VAMP2	SUPT20H	GMEB2	LSM6	PTOV1	RBL2	UBE2G2	CIP2A	ARHGEF26	DDX39B	PSAT1	LCORL	ADPGK	STAT2
TJP2	PCMTD2	RPS3A	ADAMTS1	AP2A1	GPBP1L1	CTNNBL1	NKX2-5	POMGNT2	MRPS21	NUP37	HMBOX1	ANKHD1	BRCC3	MBD2	STXBP2	CPNE8	POLR2D	EXOC4	CIAO2B	DSTN	SNRNP70	SMARCA1	MTO1	BMI1	TLE2	SERPINB12	CALCOCO2	SLC7A5	ATXN7	NOL4	MYT1	RNF8	TTC33	AUP1	PHF20	MRPL48	RTN1	FOXD2	HDAC7	NSMCE4A	SEPTIN6
EMD	STAU1	RPS8	GAR1	ITPRID2	CNOT1	DHX38	RPL37	TTC1	AAMP	RAB2A	ARL10	ZCCHC3	DHPS	HDAC5	AVL9	PTPRG	ZNHIT1	PLOD2	ALG6	TPRN	SNRPA	MKI67	PNO1	HOXD13	CDC42BPB	CALML5	TAX1BP1	INTS1	SUPT3H	ATF7IP	PFKFB3	RBM22	HROB	AK2	DNAH6	UCKL1	KLK5	ARNT2	SETD5
DSP	RPS18	RPS16	MRPL27	AP2B1	PLD2	NFS1	C1QBP	SCML1	PPID	CFAP47	OTX2	STAU2	CDK7	MRPS33	CELF1	UBXN6	EED	CSNK1G3	CEBPD	JAZF1	SP9	BAZ1B	SSR1	MSX2	POLR2C	ARPC4	HS6ST2	SRBD1	TAF10	MDH2	SDCCAG8	ZSCAN5C	CEP76	CISD2	TRAPPC4	RBM8A
CALML3	RPS4X	RPS14	NOP14	FBXO46	CNOT3	LYAR	SMG1	RHOC	SUMO2	INTS10	PDX1	FAM120A	PAPOLA	MAML2	COMMD4	CASK	PHF14	SLMAP	CHCHD4	PDLIM1	SNRPB	ZNF687	TERF2	GTF2A1	PELP1	HP	ISX	MRTFA	MORF4L2	GATAD2A	ZBTB34	RFPL4A	DDB2	RMDN1
CCDC59	SSBP1	RPS23	MAP7D1	PALS1	PMPCB	GTF2H2	NKX2-4	RAB3B	SPATA2	GLT8D1	POLB	EIF4A3	BRCA2	ZC4H2	ANAPC7	HSPA12A	SON	SYNJ2	MRPS6	RNF25	ZNF3	CBX1	NRAS	GTF2A2	P4HA1	IGHA1	LHX6	NDUFAF4	ATXN7L2	UBC	CHMP7	ZSCAN5DP	WAC
FBXO21	DDX50	RPS29	NOC4L	MYO18A	TYK2	CHCHD6	DHX57	ARL1	PRKAR2A	MICU2	HLTF	YTHDF1	XIAP	DPY30	ZBTB3	EPHA2	ATRX	IRAK1	ZBTB21	CAPN2	YLPM1	KANSL3	ATP6V1H	RBPJ	IQGAP1	TGM1	ERP29	TOMM22	TADA1	RPL13	NACC2	RFPL4B	PLAGL2
FHL1	HNRNPUL1	RPS13	ZNF146	EMG1	GGCX	PPIH	CMSS1	RAB9A	SRGAP2	SCYL1	CHD1L	CPEB1	FAM50A	ATF7	COPA	ROR2	CKS1B	PYGL	SNX2	GEMIN8	RBM10	KANSL1	COX15	CBX2	GCFC2	S100P	AHSG	FHL3	SGF29	RPL23	GTF2IRD1	MBD3L2B	PIAS3
PPA1	VIM	RPS11	DCAF1	MISP3	PIP4K2A	UTP25	TUG1	CHP1	N4BP2	VPS51	BANP	CSTF2	FAM91A1	FOXK2	RNASEH2A	DSC2	SUZ12	SH3GLB2	AASS	S100A2	MLLT1	DYNLL2	TMEM11	SNAPC1	CCNC	LCE1C	PDIA6	PATZ1	MRGBP	MRPS18C	TESMIN
UBE2S	TFAM	RPL23A	PTDSS1	LRCH3	DGKE	RIOK2	LAMA5	STOML2	HGS	GET3	LEMD2	ELAVL2	CWF19L1	NAB1	ZWINT	DLG1	EZH2	TRAF5	ARL6IP5	MRPL53	RBM39	NUMA1	CDC42EP1	HS1BP3	EIF2B2	NCCRP1	PRSS3P2	ATP5PF	ATXN7L1
PITHD1	FLOT2	RPS15	ZSWIM8	IARS2	AMPD2	ZRANB2	BCAT2	SCAMP2	IKBKG	LANCL1	POLR3B	PUM1	CTR9	GLI3CL	KIF4A	SCRIB	CDCA8	GRK2	ZNG1A	TET3	TUBA1A	RIF1	SEC31A	SNAPC4	DHX34	LMNA	FAM168B	TAF1L	TAF6L
MATR3	POLDIP3	RPS25	TRIM56	ARHGEF12	POLE	PAK4	RNASEH1	PTK7	VPS26A	SDHB	UBP1	ELAVL1	KDM3B	KPNA5	ATP5F1D	VAMP3	DNTTIP2	GKAP1	RAB3GAP1	PEDS1	CDC26	THOC7	BCL2L13	ADNP2	PRPF40B	LMNB2	VSIG10L2	IKZF5
MRPS5	MRPS12	RPL10A	REPIN1	DCTN4	PMPCA	EIF2AK2	LRP3	IQGAP2	PEX19	LMAN1	PARP2	FIP1L1	KHDC4	ATP5ME	TRMT5	MAP9	C16orf87	SECISBP2	COPS7B	KCTD1	PRCC	BAP18	ARAF	SLC25A47	FLAD1	SYNE1	SMAD5
ZFR	TOP1	MRPS15	HERC5	LIMCH1	PLD1	H2BC17	PLAT	MOXD1	PRRC1	SLC39A14	POLG2	SYMPK	FNBP4	NAB2	DDX59	STEAP3	MPND	MARF1	TPBG	CMC1	CLP1	INTS12	RBBP9	ZNF384	MIS12	MT2A	SLC1A5
DBN1	RBM34	RPL24	CUSTOS	PALM2AKAP2	BTG3	GSK3B	AHR	ATAD1	GON7	NSDHL	TIMELESS	PURB	NEK9	HIPK2	PMF1	GPRIN3	RBM15	DAPK3	UQCC1	NDUFAF1	WDR83	THAP11	MPST	SNAPC3	POLI	CD59
PYCR1	ZNF512	RPL36A	ZNF711	NME4	PLEKHG4	JMJD6	TRAPPC10	STX16	PPIL4	TOMM40	CEBPG	STRBP	LEO1	SOD1	MOB3B	PPFIBP1	ZNF106	MAP3K7	PPP3R1	FANCA	RBM4	DIDO1	LARS2	FOXB1	ZC3H13
MAPK9	C7orf50	RPL19	TRIM37	MYO5A	OBI1	SNX27	MAD2L1	SPTLC2	ARFGAP1	PPT1	CCDC85B	FUBP3	CCDC97	ATF1	VPS36	UNC5B	ZDBF2	CFAP410	GMNN	BID	SRRT	ERCC4	EARS2	NSD3	SPC25
SUGP2	GTPBP4	RPL18A	ZNF850	SEC24C	LPCAT4	AIMP1	MOGS	RHOG	ARHGAP32	SH3KBP1	FAM83D	CEP85	MASTL	QKI	ZC3HC1	VANGL1	CNIH4	TTK	MLEC	NDUFB6	WDR33	RBMXL1	BPHL	ZFHX2	DAXX
DOCK6	DDX24	DHX9	NHERF2	DCLK1	PHLDB3	ITPR3	MBTPS1	TAMM41	TPD52L2	LETM1	GULP1	TNRC6A	TONSL	VGLL4	FAM114A1	PCDH19	BAZ2B	LRBA	INPP5A	TGOLN2	PNN	ZNF471	RASSF8	RAI2
TES	RBM28	RRP1B	NEURL4	HDHD5	RETSAT	SCAMP3	NOL9	NIPSNAP1	SERPINB7	UTRN	RBM19	AGO3	INTS4	NDUFAF2	AFAP1L2	FRS2	BAZ2A	AHI1	ENOSF1	SYNJ2BP	RBM27	CCNA2	PIP5K1A	CHD9
TPM3	HMGA2	RRP12	GPATCH1	SH3BGRL2	USP30	NDUFA9	TRNP1	EIF2B3	STAM2	SLC12A2	MSANTD7	TNRC6B	KIF20B	ZNF260	ARL14EP	NIBAN2	LSM7	POC1A	CACUL1	RRAS2	TFIP11	RBL1
TPM1	SKI	DDX1	KIAA1522	YARS2	LRP10	ELF3	HIBCH	NDUFS2	CEP43	GOLGB1	ZBTB39	SMG7	PIK3R4	MED19	SHCBP1	CDCA3	NOP58	KBTBD8	COA1	HEATR5A	CDK11A
TPM4	PYGO2	MRPS31	CDK5RAP2	MYO1C	MCAT	CIBAR1	TRMT10C	SLC1A3	SNAP29	TRAPPC1	PDS5B	EIF4ENIF1	SLC4A1AP	ZNF174	FBXO17	NUDT12	TMX2	POC1B	TM9SF3	ARL15	WBP11
MYH14	PGRMC1	MRPL4	PRKRA	MYO1B	KSR1	ELL	FBXO33	EMC1	TTC4	CLGN	TEX10	AGO2	SETD2	VBP1	NSL1	PARD6B	HMGB2	RAPGEF6	ZNF446	SLC25A15
GCM2	SEC16A	DDX21	PUM3	MYO1D	RPTOR	EGLN1	KBTBD6	TM9SF4	BAG3	TAP2	ROMO1	SMG5	CRNKL1	RBM6	USP28	ZDHHC5	CHD1	SENP2	PLXNA1
NFASC	PRDX4	MRPL39	POP1	MYO6	PLCD3	VGLL2	GALNT12	NDUFB9	NUP214	AGPS	IKBIP	TNRC6C	PHAX	UQCRB	KIF2C	EPB41L1	GLDC	DIAPH3	MTCH2
GSN	CTBP1	RTCB	MARK3	ARPC2	WDTC1	TEAD2	CSGALNACT2	TIMM23	SPA17	CLU	ATAD5	R3HDM1	PPP4R2	PKN1	OSBPL10	PEAK1	UBE2D3
PRSS1	PRRC2B	MRPS18B	LONRF2	SVIL	TC2N	KIF22	METTL13	AAAS	PROSER3	RALA	VEZF1	SMAP2	CFDP1	H2BK1	NELFA	PSD3	TOE1
MYL6B	ZNF516	PSME3	POLRMT	MYO1E	PIP4K2C	ATAD3B	CCDC71L	TLCD1	RILPL1	ATP2B4	PDPK1	GARRE1	CIZ1	COX7C	DCP1A	RASAL2	CASP8AP2
LAP3	SMC3	HSPE1	URB1	MYO5C	CERK	MIB1	GOLM1	TMT1A	TMEM214	GARS1	TSHZ1	GIGYF1	PAXBP1	GNG10	AFF4	VANGL2
SCIN	P4HA2	ALYREF	NKTR	MYO5B	CNOT9	MYSM1	GRPEL2	TOR1A	RAB11FIP2	PAFAH1B1	NMD3	UBAP2L	MED22	DUOXA1	CDYL
AKAP8	HIRA	LSM14A	SOGA1	FKBP5	FBXW5	MGST3	OLIG1	SNAP23	NUP54	RAP1B	GCLM	TTC31	NELFCD	MRPL14
COX6B1	KMT2D	PSMA7	ZNF324	CLPX	ITPKC	POLR1G	PPP1R35	CDIPT	HOOK3	ANK2	CDC7	UBAP2	MSANTD2	CHCHD1
PRDX3	ZNF609	PSMA3	ZBTB11	RHOA	FAR2	MTX2	USP33	STRN	ERICH1	OCLN	XRCC3	CC2D1A	CHD3	MRPL34
NSUN2	HDAC3	PSMA4	ZNF121	PPP1R18	CNOT6L	STK10	KBTBD7	GBA1	IFT20	SZT2	SGO1	EDC4	SOBP	NOP10
ZNF638	KDM6A	PSMA5	TRIM26	SLC25A13	DUSP9	FRYL	POMGNT1	ACAD11	STAM	DPP9	PVR	GIGYF2	MTA3	CHMP2B
TMED2	TBL1X	NAP1L1	URB2	SPTBN2	MICU1	SRC	LPGAT1	ELMOD2	ATG2B	GOLGA5	MAN1A1	USP54	GATAD2B
HMGA1	NCOR1	G3BP1	LAMA4	GLB1	TNKS1BP1	ERCC3	DYNC2I2	TMX1	NUP88	RDH11	MPI	LARP4	SEC61G
USP10	ATXN1L	HNRNPA1L2	ZNF569	CDC42BPA	CNOT10	GTF2H1	SCARF2	GPD2	TBL1Y	TIMM17A	MLH1	RNF214	RSRC1
HNRNPLL	DCAF7	PABPN1	ZNF787	UHRF1	UTP6	CACNA2D1	CDK5RAP1	RTN4IP1	IFT27	ASCC2	BAG6	PUM2	EMC7
DNAJA2	TLE1	GNL3	ZNF227	CEP250	CNOT2	ITPR1	THTPA	SAMM50	CUEDC2	SDF2	RUNX1T1	EDC3	C19orf25
MRE11	TLE3	STRAP	ZNF100	FLOT1	CNOT8	RFTN1	C1orf198	BAG4	WDCP	PLXNB2	CYP51A1	ATXN2
NF2	RING1	GNL2	ZFP82	CTNNA1	CNOT7	TOMM20	RNF41	HLA-A	FAM114A2	CYP4X1	DOLPP1	AGO1
TJP1	NCOA6	HP1BP3	ZFP62	DDX52	CNOT11	TBC1D10B	ITM2C	ATL2	CLN6	TENT4B	RAB24
SPTAN1	GSE1	BRIX1	ZNF420	UBR4	CNOT6	APOOL	CHST7	RAB2B	LIMD1	CDK5RAP3	ZC3H10
CRACD	RBBP5	NOC3L	ZNF483	XPO7	AP4B1	STXBP4	TCP11L1	VAMP7	JPT1	MGST2
AIF1L	NCOA2	PRMT1	ZNF689	ARPC5L	TTC28	MTERF4	SRRD	EMC8	KNSTRN	GPN1
TMOD3	BRMS1L	PITRM1	ZNF48	LRCH1	EIF3M	ARMC10	MAN1B1	SUN2	WDR45	RELCH
TMOD2	LIN9	KLF8	ZNF607	ATXN10	GREB1L	KLHDC4	FBXL3	EPHX1	WIPI2
LIMA1	LIN54	POM121C	RAB11FIP5	ZNF629	KLC4	GTF2H4	FAF1	CYB5A	NME7
PPP1R9A	BCOR	FHAD1	SMARCAD1	TEAD4	HECA	MTARC2	DAAM1	ERGIC1	LDHB
CORO2B	PAXIP1	PSMD11	DROSHA	CUL2	ASCC3	NAT10	LAS1L	MYEF2	RPL38
LRP2	ZZZ3	PSMD12	ZFP30	DNM1L	EIF2AK4	DHX35	CHCHD2	GEMIN2	KARS1
DYNC1H1	ARID1B	PSMD14	NOP16	TOMM70	WASHC2C	AGPAT5	DVL1	GDPD1	SEC23B
EIF2S1	KDM2B	DDX3X	MSI2	IMMT	BIRC6	CWC25	SKA1	DEGS1	DIS3L
PYM1	DPF1	PDCD5	MRPL10	NSA2	DDX20	ARMCX3	HAUS8	NIPSNAP2
LONP1	DPF2	EIF3D	MRPL41	HSPBP1	COMMD9	SHANK2	SGTA	BAX
HSPG2	SMARCD2	PSMD3	MRPL43	DARS2	SASS6	COX6A1	HELZ	SLC27A3
CTNNB1	SMARCE1	BUD23	FAR1	ODF2	CCP110	ABCB7	SMIM11	EIF2B5
CETN2	PCGF1	EIF3G	MRPL38	CAMK2G	SUMO1	TMEM205	HAUS3	CPD
MTPN	PAGR1	AIFM1	MRPL20	NUP205	RPGRIP1L	IPO9	SLX4	NNT
GATA1	TBL1XR1	ATP5F1B	MRPL13	ELN	DLG5	SDF4	NAA25	APMAP
TRIP6	SALL1	HMGB1	MRPL1	STT3A	CEP192	NCLN	STX12	NAPA
DHX36	RCOR1	HNRNPA1	MRPL17	GNG12	PIBF1	FDFT1	CBS	PRAF2
PRPF40A	PRR12	TXN	MRPS18A	ESYT2	UNK	MUC16	BZW2	NDUFB8
SPTBN1	SSBP2	PCNA	MRPS10	CYB5B	CEP72	PALS2	NOL4L	HLA-B
SIRT1	LDB1	COX4I1	ZNF195	PDCD6	ELOVL5	YIPF5	CYRIB	INSR
HOXA9	RXRA	PRKCSH	PRORP	CTSB	HAUS5	YAP1	UBE2Q1	RRAS
RFX6	POGZ	ZKSCAN1	FASTKD2	DTYMK	NCAPG2	RAD51C	PIAS2	HLA-C
RFX1	ACTR5	PSMC3	GRAMD1A	AK4	GPT2	RAB34	TOP3B	GNA11
DLD	MAU2	PSMB1	EIF2B4	NDUFA8	EIF3K	TM9SF1	RC3H1	NME3
IMPDH2	BPTF	VDAC1	BCS1L	TPD52	CCDC85C	SACM1L	TDRD3	ANO6
GATA3	CSNK2A2	PSMA1	MFN2	NPEPPS	TBKBP1	LMAN2	LEF1	TOR1AIP1
FTL	PBX2	PSMA2	ASMTL	ABCE1	ASCC1	COLGALT1	UBE2O	AGTRAP
FTH1	UBN2	CANX	LRRC41	SEC61A1	STRN4	VGLL3	OIP5	KIAA2013
FXR1	RPS27L	PSMB4	SAMD4B	NUP160	PTK2	ACSL4	NUDCD3	STT3B
TARBP1	TIMM13	PSMB6	SARM1	EBP	BLTP3A	NUP155	MOB4	PIEZO1
PYCR3	ETV5	PSMB5	SLFN11	SKIC2	ANKRD28	RAB6A	HAUS7	MBOAT7
MAEA	TRIM8	HNRNPH3	TOR1AIP2	TRIP13	NOS1AP	LSS	DDHD2	VPS13A
PEG10	SALL2	PHB1	PIGT	TOMM34	NEDD1	FBXL20	EIF2D	NDC1
ARMC8	ISL2	PSMC2	ZNF622	NUP188	FHL2	KIRREL1	AKT1S1	ALG8
ANKRD52	SSBP4	ATP5F1C	KTI12	USP34	TUBGCP4	PIGS	GTF3C2	LDAH
NOA1	TAF1	TMPO	YME1L1	PRUNE1	KATNB1	FOXC2	HAUS4	ATP13A1
DDX55	BEND3	PSMC4	VPS33B	LRRC49	DENND5A	WWTR1	SPART	TIMMDC1
LARP4B	CHD7	VDAC2	USP24	COQ8A	SYT12	RAB1B	TAB3	BPNT2
USP9X	CABIN1	ATP5PO	APBB1	ARHGEF2	NUP133	SIL1	ALMS1	RAB23
ARK2N	E2F6	PSMB3	MCM3AP	TBRG4	TAPBP	TAOK2	HAUS1	SLC4A7
AHCYL2	VPS72	PSMB2	CLPTM1	ARL8A	GNG4	SRPRB	HAUS2
NAF1	MGA	PSMD7	ZNF680	AURKB	FBXW9	SPCS2	SLX4IP
DCAF5	L3MBTL2	HNRNPF	TELO2	S100A13	CSPP1	PCYOX1L	CAPNS1
TRAPPC9	NOP53	PSMD4	DHX37	UQCC2	KIAA0753	KIF13B	MTMR12
RMND5A	FBXW11	EIF3B	POGK	TUBGCP2	CEP162	PALM	GLTP
MRM3	TLE5	MAZ	RAB29	MDN1	LARP1B	NDUFS3	KATNA1
MKRN1	TAF4	EIF3E	ETFDH	DDX19A	LLGL2	GOSR1	EFL1
RRP7A	TAF6	EIF4A1	DDX31	FANCI	CEP112	ITGA5	KIF5C
CUEDC1	TAF8	RPL37A	MRPS30	STK26	NAV1	CD81	KIF1B
TMOD1	LHX8	RPS7	HEATR3	SEC63	KLC2	JAGN1	ERCC1
MYL6	EYA4	PSMC1	ZNF780A	ECI2	PHKA1	NKIRAS2	CBL
MYL12B	MORC2	PSMC5	ZNF12	ATP2B1	PAN3	LAMB1	SULT1A1
CGNL1	ZNF217	PSMC6	EXD2	TUBG1	DCP1B	DHCR24	RASSF2
CGN	SMC1A	GTF2I	DCAKD	NUP210	PPP1R13B	UFSP2	CORO7
EWSR1	CTCF	ERH	IPO11	DYNC1LI1	MBLAC1	ARFGEF1	CDK5
RAN	FOXP2	HNRNPU	PLAA	OPA1	SIPA1L1	SMC2	CAMK1
WRAP73	FOXP4	EIF4G1	THEM6	NDUFA10	DYNC1LI2	ALPL	PAN2
PSME1	DDX56	PRDX1	ZNF8	PFKM	WDR62	CDC42	KIAA0930
PURA	SETD1A	PSMD2	RNF213	SRPRA	ZNRD2	CAV1	ABRAXAS1
RFX4	ZNF536	TRIM28	ZNF226	CPT2	EIF4E2	DOCK11	DPY19L3
JCAD	TRIM24	EIF3I	HTT	BSG	OPHN1	GLMN	TDRD7
CALM1	TNRC18	HNRNPD	HECTD1	MAP2K2	BCR	PIGQ	STON2
RBM11	MYBL2	EIF3A	MAOA	IDH3A	EPS8	PRXL2A	IFT81
PIN1	HIVEP1	MAP7	TOMM7	S100A10	TRIM32	PTGFRN	APBB2
TNFRSF10B	ATXN1	CAPRIN1	NIP7	MTX1	PPFIA1	SLC12A4	COPS4
AFDN	FOXK1	GANAB	ZNF724	FKBP8	FOCAD	ZBTB38	WDR41
DECR1	QSER1	NOLC1	NIFK	NCAPD2	HAUS6	GNAI1	COMMD3
ATP5PD	ZNF423	PSMD6	SDAD1	AARS2	DGKH	AP3S1	R3HDM2
PSAP	ARID4B	RCN1	RIOX1	IPO4	DDX60	NDUFB11	RNF114
VTN	TSHZ3	ADRM1	MRPL19	TNPO1	FCSK
ITIH3	ARID2	SLC5A9	DOP1B	DDRGK1	CNTROB
TSSC4	MIDEAS	ZNF66	MRPL45	CLPTM1L	FBXW8
MYO9A	C15orf39	ZNF611	PI4KA	MMS19	NIN
GAK	MED13L	SERBP1	MRPL40	PKP2	MINK1
POTEF	ASXL2	ZNF485	ECSIT	LMF2	CEP120
GABPB1	EMSY	ZNF721	TMEM209	NUP85	BBS1
GAPDHS	RAI1	HDAC2	TMX4	OSBPL8	TSC1
EXOSC2	PCGF5	RPL36AL	ZNF316	LRRC40	SNF8
DHTKD1	STAG2	LRRC59	ZNF197	NOC2L	IFT74
RCC2	KMT2C	HIC2	ZNF264	AFG3L2	MPHOSPH9
KLF10	TET1	SAMD11	MSI1	NBAS	RPAP1
JUP	CHD6	PSMB7	ZNF749	GNPAT	ELP3
IQGAP3	MORC4	EIF3C	ZNF354A	ORC4	CTNNAL1
TNKS	DOT1L	PHB2	ZNF189	CTNND1	ANKRD26
GJA1	GATAD1	ZNF768	ZNF432	LTN1	TBC1D2B
SPRR2D	BAP1	MID1IP1	ZNF875	UFL1	PRKAB1
SERPINB3	ZBTB10	BCLAF1	ZNF250	NDUFB4	CRYBG1
DMTN	ZNF521	TRMT112	ZNF23	CDS2
SPECC1	PHF12	G3BP2	ZNF28	CAPN1
AMOTL1	CIC	PSMD13	ZNF30	HMOX2
FIGLA	BCL11A	EIF3L	ZNF7	SOAT1
AIP	ZNF703	VDAC3	IGHMBP2	NCAPD3
ACP1	FBRSL1	THRAP3	ZNF133	PTPN9
ATG13	RCOR3	RPL36	ZNF136	PPOX
TRNT1	TCF20	PARP1	GEMIN4	ARFIP1
P4HB	TRPS1	KPNB1	FAM193A	GTF2B
COX5A	ZHX1	H2BC5	ZNF45	EIF2B1
PTBP1	ZNF608	CSNK2A1	ZNF92	INF2
KHDRBS1	KMT2B	CHMP4B	ZNF33A	TKFC
TARDBP	ZNF281	SOX5	ZNF616	ECPAS
NDUFA5	RAD54L2	RPS15A	ZNF543	SLC25A24
TECR	NCOR2	COX6C	ZNF155	SFXN4
HIGD1A	MRPL11	CIRBP	GAS6	TMTC3
PBX4	ZFHX4	PGAM5	ZNF267	CLASP1
MEIS1	RESF1	ETV3	ZNF234	DNAAF5
MEIS2	TRIM33	LHX1	ZNF235	KLHL7
POLR2I	BCL9	DGKK	ZNF273	GSPT2
PKNOX1	ATN1	LHX2	ZKSCAN8	UBLCP1
MRPL54	ZFHX3	NUSAP1	MRPL23	CKAP2
CASD1	BCL7A	SOX4	ZNF829	TUBGCP3
AK6	RBM20	KLF5	ZNF792	NSUN5
NKRF	RBM14	HRNR	ZIK1	VAT1
HSPB1	DNTTIP1	NFATC4	MRPL51	NTPCR
FOXP1	FBRS	COX5B	ZNF585B	FANCD2
ARHGEF11	RERE	PFKP	ZNF805	NT5DC2
ZFP28	NCOA3	EIF3F	ZNF667	HINT3
GADD45GIP1	TP73	PES1	ZNF658	SDR39U1
HSF4	CBFA2T2	PHGDH	ZNF776	PANK4
GK	PRC1	SURF6	HEATR6	STK39
SESTD1	PIAS1	ZMPSTE24	ZNF324B	VPS4A
DNAJC11	WIZ	RPN2	ZNF529	SBDS
FOXJ3	SKIL	ENO1	ZFP1	TNPO3
CAMK2D	TFE3	HSP90AA1	ZNF562	SCO1
MRPL50	MNX1	HSP90AB1	ZNF620	GLS
HBA1	MECOM	EEF2	ZNF551	YARS1
SPRR2E	TLE4	COX7A2	ZNF554	UBXN4
GPC4	FOXM1	NME1	ZNF354C	ATP5MK
ZFPM2	FOXC1	ATP2A2	ZNF573	VPS35
TIMM44	STRN3	STMN1	ZNF567	NDUFA13
MPDU1	SMAD4	NME2	ZNF614	NOB1
GRPEL1	NCOA1	UQCRC2	ZNF615	IST1
SPTB	PCGF3	ATP5F1A	ZNF383	RAC1
ABCF2	FIGN	UQCRC1	ZNF555	COASY
GOLT1B	AHDC1	PRDX2	ZFP90	DHRS7B
NUDT1	TET2	RPL22	ZNF606	COQ9
HSDL2	SMARCD3	RANBP1	ZNF566	UBL4A
MAVS	TPGS1	KPNA2	ZNF274	SH3GLB1
RBPMS	BCL9L	MRPL12	ZNF764	MAP2K1
PYCR2	PROSER1	CSE1L	ZNF845	FAM162A
DNAJA3	IRF2BP1	RAB8A	ZNF668	COPE
POMK	RAVER1	ARF3	ZNF570	OSBP
ANAPC15	ZMIZ2	RAB1A	ZNF317	ARF6
TOMM6	AUTS2	RPL31	ZNF587	ITPA
ISOC1	MAML1	RPL32	ZNF184	ZW10
SKP1	RREB1	RPL8	ZNF649
CCAR1	ZNF503	PPIA	ALG1
MGMT	TRERF1	H3-3A	GZF1
CEP128	ASXL3	SLC25A3	PDF
RPRD1A	PRDM16	SET	ZNF286A
DPCD	HMG20A	TRAP1	ZNF160
MAPK1IP1L	TCF7L2	PHF6	ZFP14
RRP15	PRDM6	GNB4	ZNF331
UBE2C	HMG20B	DIABLO	ZNF71
CHCHD3	BAHCC1	HACD3	ZNF302
MACROH2A2	DACH1	KCMF1	SPATS2L
UBE3A	ZMIZ1	PRPF19	RBAK
UBQLN2	SOX13	RPL26L1	USP36
UBQLN1	EHMT2	NUDC	ZNF624
CTSA	ZNF644	KLF15	ZNF107
ANKFY1	ZNF512B	HNRNPDL	ZNF225
BLVRA	MEN1	ZNF284	ZNF221
SMU1	MITF	MRPL21	RCL1
RC3H2	SLC2A1	RAB1C	ZNF337
ZNF709	SS18	MRPL24	ZNF175
MAIP1	TAF9	MRPL37	ALG5
PCF11	TAF3	MRPL44
CPSF4	NIPBL	MRPL22
CSTF1	ZNF746	MRPL16
CPSF7	PBRM1	ZNF319
FUBP1	YAF2	ETV7
RBM12	RYBP	ZKSCAN3
CPSF2	PHF10	EIF6
CERS2	BCL7C	TRMT1L
MYCBP	DPF3	CHD5
C6	ZNF462	ZKSCAN4
PCYT1A	BCL7B	ZBTB14
NUCB2	CECR2	USP27X
MTCH1	PCGF6	DEAF1
PSMD9	HEATR1	BRD2
MAP1S	BRMS1	PRDM2
EXOC2	UBN1	NEMP1
AGPAT1	BRD7	ASF1A
DCUN1D5	DHCR7	TDP2
SLX9	ZNF148	MTA1
UQCR10	AP3M1	DHX40
EXOC7	ZEB2	RFC1
NDUFS4	NR2C1	C3P1
LAMTOR5	CUX1	H2AC1
NDUFS6	RFC5	NEPRO
HSBP1	NSF	HMGB3
SCAF4	NR2C2	PHF2
PTTG1	SMARCA2	MMTAG2
F2	SIM1	TAF15
C5	GTF3C1	ZFP91
HBD	RLF	RECQL5
C9	PDS5A	SLU7
C8A	IRF2BP2	MFAP1
C8B	L3MBTL3	SNW1
C8G	SAP130	ZNF770
UQCRH	IRF2BPL	H1-10
LGALS1	EHMT1	SCAF11
C7	GTF3C3	PPIL1
F5	MED28	SQSTM1
MYL4	TRIM65
NDUFV2	PRKAR2B
CTNNA2	BLM
PRDX5	SS18L1
PRSS3	HOMEZ
ETFB	SINHCAF
ANXA11	ZSCAN21
UBE2N	HOXB9
RAB14	ARNT
CAMK2B	LMO4
LAMTOR1	LRIF1
MZT2B	PIAS4
MRPL52	RNGTT
GAS2L3	VPS4B
ENAH	TBX2
TXNDC5	PHF21A
NUDCD2	TCF7L1
GEMIN6	PYGO1
PSMF1	GLYR1
NDUFAF3	FTSJ3
DCTPP1	DDX27
SLTM	SMCHD1
UGGT1	LIN52
FKBP4	KAT2A
MUCL1	LIN37
UBQLN4	MBIP
BSDC1	POLH
RER1	RNF2
CIAO1	RAD21
NDUFV1	ZEB1
PRKD1	MEF2D
PRKD2	BCL11B
TPGS2	IKZF3
TBC1D19
FKBP10
KLHL10
MEAK7
TMEM33
ZCCHC8
XPO5
GALNT2
NEFL
LYN
LAMC1
UQCRFS1
NID2
RSU1
TPD52L1
CROCC
ERLEC1
SGTB
MMAB
CBY1
SH3PXD2B
EGFR
ETFA
PREP
MFSD10
OCIAD2
HM13
PLEKHF1
SEC62
MAGT1
EPPK1
RAP1A
SPEG
RNF168
TRAPPC14
WDR24
RDH14
ALG13
CENPM
RFC2
ECE1
SFT2D3
SANBR
TBC1D31
NMNAT1
MIF4GD
PPP6R2
CNP
CD9
FECH
WEE1
RBX1
PTP4A2
ATPAF1
DHX32
WDFY1
UNC45B
SCCPDH
HINT2
NUDT4
CARHSP1
[truncated: 31 more columns]

## Sheet: Com-Com interaction (All)
C1	C2	Both	Just_C1	Just_C2	Neither	pValues (Fisher exact test)	FDR	Judge1 (Both - Just_C1)	Judge2 (Both - Just_C2)	Judge		Column	Description
community2	community5	3	10829	6454	12001	0	0	-10826	-6451	In isolation		C1	community 1
community3	community5	16	2478	6441	20352	3.17263e-251	2.85695e-248	-2462	-6425	In isolation		C2	community 2
community1	community2	661	3408	10171	15047	3.98055e-213	2.38966e-210	-2747	-9510	In isolation		Both	The protein-protein interaction contain C1 and C2
community15	community2	1230	466	9602	17989	3.56293e-206	1.60421e-203	764	-8372	Closely		Just_C1	The protein-protein interaction only contain C1
community2	community7	170	10662	1795	16660	1.42739e-194	5.14145e-192	-10492	-1625	In isolation		Just_C2	The protein-protein interaction only contain C2
community15	community5	8	1688	6449	21142	3.8191e-173	1.14637e-170	-1680	-6441	In isolation		Neither	The protein-protein interaction does not contain C1 and C2
community2	community4	24	10808	996	17459	2.06482e-166	5.31249e-164	-10784	-972	In isolation		pValues (Fisher exact test)	Fisher exact test's P-value
community2	community9	11	10821	842	17613	1.22679e-152	2.7618e-150	-10810	-831	In isolation		FDR	P-value, after Benjamini-Hochberg correction. Only cases with p < 0.05 are shown
community2	community8	38	10794	775	17680	4.01739e-109	8.03924e-107	-10756	-737	In isolation
community2	community24	22	10810	688	17767	1.93315e-108	3.4816e-106	-10788	-666	In isolation
community2	community6	4	10828	547	17908	8.49533e-104	1.39092e-101	-10824	-543	In isolation
community2	community21	96	10736	916	17539	1.20127e-91	1.8029e-89	-10640	-820	In isolation
community31	community5	2	865	6455	21965	2.11065e-91	2.92406e-89	-863	-6453	In isolation
community11	community2	191	1171	10641	17284	1.12647e-82	1.44913e-80	-980	-10450	In isolation
community23	community5	2	783	6455	22047	2.43591e-82	2.92471e-80	-781	-6453	In isolation
community13	community3	162	179	2332	26614	1.60803e-81	1.81004e-79	-17	-2170	In isolation
community22	community5	5	727	6452	22103	2.77084e-71	2.93547e-69	-722	-6447	In isolation
community1	community15	32	4037	1664	23554	8.69477e-71	8.6996e-69	-4005	-1632	In isolation
community25	community5	17	843	6440	21987	8.38208e-69	7.94533e-67	-826	-6423	In isolation
community10	community2	17	438	10815	18017	6.77815e-66	6.10373e-64	-421	-10798	In isolation
community1	community12	126	3943	2669	22549	1.25929e-64	1.08e-62	-3817	-2543	In isolation
community18	community5	36	941	6421	21889	1.75119e-61	1.43359e-59	-905	-6385	In isolation
community12	community3	45	2750	2449	24043	8.52048e-60	6.67191e-58	-2705	-2404	In isolation
community17	community2	19	410	10813	18045	7.12851e-59	5.34935e-57	-391	-10794	In isolation
community13	community2	7	334	10825	18121	4.60096e-57	3.31453e-55	-327	-10818	In isolation
community1	community3	116	3953	2378	22840	2.32428e-55	1.61001e-53	-3837	-2262	In isolation
community2	community38	4	10828	304	18151	4.20496e-55	2.80486e-53	-10824	-300	In isolation
community2	community35	20	10812	379	18076	2.55963e-52	1.64639e-50	-10792	-359	In isolation
community30	community5	2	478	6455	22352	5.52413e-49	3.43067e-47	-476	-6453	In isolation
community2	community45	13	10819	314	18141	1.39583e-46	8.37966e-45	-10806	-301	In isolation
community15	community7	4	1692	1961	25630	4.09999e-46	2.38196e-44	-1688	-1957	In isolation
community3	community7	27	2467	1938	24855	2.95498e-45	1.6631e-43	-2440	-1911	In isolation
community2	community22	457	10375	275	18180	4.14145e-45	2.26023e-43	-9918	182	Closely
community5	community9	48	6409	805	22025	7.18081e-41	3.80372e-39	-6361	-757	In isolation
community2	community43	15	10817	287	18168	5.97327e-40	3.07368e-38	-10802	-272	In isolation
community2	community20	47	10785	416	18039	8.3922e-40	4.19843e-38	-10738	-369	In isolation
community19	community2	23	320	10809	18135	1.95955e-39	9.53825e-38	-297	-10786	In isolation
community11	community3	12	1350	2482	25443	1.47349e-37	6.98358e-36	-1338	-2470	In isolation
community21	community3	2	1010	2492	25783	1.6962e-36	7.83297e-35	-1008	-2490	In isolation
community40	community5	94	1042	6363	21788	2.13187e-36	9.59876e-35	-948	-6269	In isolation
community28	community5	4	388	6453	22442	2.40673e-36	1.0572e-34	-384	-6449	In isolation
community1	community23	12	4057	773	24445	1.84721e-35	7.921e-34	-4045	-761	In isolation
community11	community12	22	1340	2773	25152	1.99992e-34	8.3764e-33	-1318	-2751	In isolation
community2	community30	59	10773	421	18034	2.99339e-34	1.22525e-32	-10714	-362	In isolation
community29	community5	84	945	6373	21885	1.2431e-33	4.97518e-32	-861	-6289	In isolation
community5	community8	55	6402	758	22072	4.51682e-33	1.73081e-31	-6347	-703	In isolation
community15	community3	31	1665	2463	25128	4.44193e-33	1.73081e-31	-1634	-2432	In isolation
community29	community3	5	1024	2489	25769	5.50827e-33	2.06675e-31	-1019	-2484	In isolation
community12	community15	42	2753	1654	24838	2.81786e-32	1.03571e-30	-2711	-1612	In isolation
community5	community7	650	5807	1315	21515	1.98304e-31	7.1429e-30	-5157	-665	In isolation
community4	community5	87	933	6370	21897	2.02527e-31	7.152e-30	-846	-6283	In isolation
community2	community57	36	10796	322	18133	2.97587e-31	1.03068e-29	-10760	-286	In isolation
community21	community5	383	629	6074	22201	4.74573e-31	1.61265e-29	-246	-5691	In isolation
community2	community37	21	10811	259	18196	2.78838e-30	9.29976e-29	-10790	-238	In isolation
community2	community27	6	10826	188	18267	4.27327e-30	1.3993e-28	-10820	-182	In isolation
community24	community5	290	420	6167	22410	6.03726e-30	1.94163e-28	-130	-5877	In isolation
community1	community29	36	4033	993	24225	6.58338e-30	2.08012e-28	-3997	-957	In isolation
community2	community48	28	10804	277	18178	8.40537e-29	2.61001e-27	-10776	-249	In isolation
community2	community56	34	10798	294	18161	4.33266e-28	1.32256e-26	-10764	-260	In isolation
community11	community5	473	889	5984	21941	4.86717e-28	1.46096e-26	-416	-5511	In isolation
community2	community3	1179	9653	1315	17140	5.48273e-28	1.61875e-26	-8474	-136	In isolation
community40	community7	5	1131	1960	26191	7.62027e-28	2.21357e-26	-1126	-1955	In isolation
community11	community15	6	1356	1690	26235	9.87898e-28	2.82413e-26	-1350	-1684	In isolation
community38	community5	4	304	6453	22526	1.50345e-27	4.23082e-26	-300	-6449	In isolation
community12	community21	16	2779	996	25496	5.87425e-26	1.60296e-24	-2763	-980	In isolation
community3	community40	16	2478	1120	25673	5.80356e-26	1.60296e-24	-2462	-1104	In isolation
community1	community18	38	4031	939	24279	6.22177e-26	1.67245e-24	-3993	-901	In isolation
community16	community2	55	347	10777	18108	1.58601e-25	4.20059e-24	-292	-10722	In isolation
community12	community26	11	2784	875	25617	1.79406e-25	4.68275e-24	-2773	-864	In isolation
community1	community31	30	4039	837	24381	2.02097e-25	5.19965e-24	-4009	-807	In isolation
community24	community3	2	708	2492	26085	5.86296e-25	1.48721e-23	-706	-2490	In isolation
community23	community30	62	723	418	28084	8.9497e-25	2.23867e-23	-661	-356	In isolation
community35	community5	16	383	6441	22447	1.82168e-24	4.49431e-23	-367	-6425	In isolation
community12	community29	19	2776	1010	25482	3.21899e-24	7.83433e-23	-2757	-991	In isolation
community2	community31	464	10368	403	18052	1.2131e-23	2.91307e-22	-9904	61	Closely
community2	community36	36	10796	267	18188	7.18691e-23	1.70311e-21	-10760	-231	In isolation
community15	community21	3	1693	1009	26582	1.53991e-22	3.60179e-21	-1690	-1006	In isolation
community12	community31	14	2781	853	25639	4.21445e-22	9.73105e-21	-2767	-839	In isolation
community18	community7	6	971	1959	26351	5.08124e-22	1.15839e-20	-965	-1953	In isolation
community1	community25	36	4033	824	24394	1.99367e-21	4.48824e-20	-3997	-788	In isolation
community2	community50	40	10792	269	18186	2.69025e-21	5.98165e-20	-10752	-229	In isolation
community3	community34	11	2483	863	25930	3.30768e-21	7.2648e-20	-2472	-852	In isolation
community23	community7	2	783	1963	26539	3.42962e-21	7.44186e-20	-781	-1961	In isolation
community25	community7	4	856	1961	26466	8.02449e-21	1.72049e-19	-852	-1957	In isolation
community22	community7	2	730	1963	26592	1.213e-19	2.57013e-18	-728	-1961	In isolation
community3	community32	7	2487	713	26080	1.75332e-19	3.67177e-18	-2480	-706	In isolation
community12	community22	11	2784	721	25771	2.13131e-19	4.41205e-18	-2773	-710	In isolation
community31	community7	6	861	1959	26461	4.84471e-19	9.91513e-18	-855	-1953	In isolation
community13	community79	19	322	70	28876	5.90116e-19	1.19416e-17	-303	-51	In isolation
community2	community67	42	10790	258	18197	8.28392e-19	1.6577e-17	-10748	-216	In isolation
community15	community18	6	1690	971	26620	2.67409e-18	5.29234e-17	-1684	-965	In isolation
community1	community58	11	4058	463	24755	2.72561e-18	5.33569e-17	-4047	-452	In isolation
community18	community2	493	484	10339	17971	2.90686e-18	5.6293e-17	9	-9846	Closely
community2	community44	1	10831	94	18361	6.13173e-18	1.17481e-16	-10830	-93	In isolation
community1	community30	12	4057	468	24750	8.57834e-18	1.62627e-16	-4045	-456	In isolation
community2	community49	9	10823	133	18322	2.02929e-17	3.80703e-16	-10814	-124	In isolation
community26	community3	17	869	2477	25924	7.11416e-17	1.32089e-15	-852	-2460	In isolation
community2	community77	96	10736	36	18419	7.64392e-17	1.40477e-15	-10640	60	Closely
community26	community5	101	785	6356	22045	1.07154e-16	1.94934e-15	-684	-6255	In isolation
community29	community7	14	1015	1951	26307	1.3216e-16	2.3802e-15	-1001	-1937	In isolation
community3	community6	4	2490	547	26246	1.6418e-16	2.9276e-15	-2486	-543	In isolation
community15	community4	9	1687	1011	26580	1.74476e-16	3.08069e-15	-1678	-1002	In isolation
community1	community14	20	4049	542	24676	2.05037e-16	3.58516e-15	-4029	-522	In isolation
community1	community40	72	3997	1064	24154	2.29889e-16	3.98105e-15	-3925	-992	In isolation
community26	community7	10	876	1955	26446	6.39448e-16	1.09681e-14	-866	-1945	In isolation
community27	community5	4	190	6453	22640	7.63531e-16	1.29728e-14	-186	-6449	In isolation
community18	community3	23	954	2471	25839	8.03701e-16	1.35277e-14	-931	-2448	In isolation
community12	community23	19	2776	766	25726	1.78381e-15	2.97468e-14	-2757	-747	In isolation
community45	community5	136	191	6321	22639	1.83442e-15	3.031e-14	-55	-6185	In isolation
community1	community22	36	4033	696	24522	1.87978e-15	3.07772e-14	-3997	-660	In isolation
community3	community9	18	2476	835	25958	2.58073e-15	4.18729e-14	-2458	-817	In isolation
community2	community58	96	10736	378	18077	2.6579e-15	4.23617e-14	-10640	-282	In isolation
community12	community32	16	2779	704	25788	2.65542e-15	4.23617e-14	-2763	-688	In isolation
community1	community26	51	4018	835	24383	5.10582e-15	8.0663e-14	-3967	-784	In isolation
community12	community34	25	2770	849	25643	7.88805e-15	1.23534e-13	-2745	-824	In isolation
community15	community34	7	1689	867	26724	8.65767e-15	1.34418e-13	-1682	-860	In isolation
community3	community64	3	2491	467	26326	1.1701e-14	1.80115e-13	-2488	-464	In isolation
community11	community18	5	1357	972	26953	1.4744e-14	2.25033e-13	-1352	-967	In isolation
community11	community31	3	1359	864	27061	1.74064e-14	2.63437e-13	-1356	-861	In isolation
community12	community18	32	2763	945	25547	2.42233e-14	3.63551e-13	-2731	-913	In isolation
community48	community6	31	274	520	28462	3.04987e-14	4.53951e-13	-243	-489	In isolation
community30	community47	28	452	254	28553	3.34948e-14	4.9446e-13	-424	-226	In isolation
community11	community22	1	1361	731	27194	4.1678e-14	6.10261e-13	-1360	-730	In isolation
community15	community32	4	1692	716	26875	4.39866e-14	6.38869e-13	-1688	-712	In isolation
community14	community5	56	506	6401	22324	5.0125e-14	7.22201e-13	-450	-6345	In isolation
community15	community40	16	1680	1120	26471	6.0173e-14	8.60092e-13	-1664	-1104	In isolation
community12	community17	4	2791	425	26067	6.25415e-14	8.86907e-13	-2787	-421	In isolation
community12	community13	1	2794	340	26152	6.62703e-14	9.32443e-13	-2793	-339	In isolation
community12	community40	43	2752	1093	25399	6.98181e-14	9.74747e-13	-2709	-1050	In isolation
community15	community31	8	1688	859	26732	7.98906e-14	1.10679e-12	-1680	-851	In isolation
community15	community29	13	1683	1016	26575	8.73138e-14	1.2004e-12	-1670	-1003	In isolation
community15	community24	4	1692	706	26885	9.90079e-14	1.35086e-12	-1688	-702	In isolation
community53	community6	22	129	529	28607	1.1717e-13	1.58663e-12	-107	-507	In isolation
community11	community7	32	1330	1933	25992	1.30155e-13	1.74932e-12	-1298	-1901	In isolation
community16	community5	33	369	6424	22461	1.57136e-13	2.09631e-12	-336	-6391	In isolation
community1	community4	68	4001	952	24266	1.59015e-13	2.10578e-12	-3933	-884	In isolation
community15	community9	8	1688	845	26746	1.63618e-13	2.15092e-12	-1680	-837	In isolation
community5	community53	3	6454	148	22682	8.3606e-13	1.09112e-11	-6451	-145	In isolation
community5	community67	121	6336	179	22651	9.55237e-13	1.23768e-11	-6215	-58	In isolation
community36	community5	21	282	6436	22548	1.29168e-12	1.66165e-11	-261	-6415	In isolation
community29	community31	1	1028	866	27392	1.52093e-12	1.9427e-11	-1027	-865	In isolation
community12	community30	8	2787	472	26020	1.93729e-12	2.45708e-11	-2779	-464	In isolation
community25	community4	1	859	1019	27408	2.17485e-12	2.73909e-11	-858	-1018	In isolation
community12	community24	20	2775	690	25802	2.19662e-12	2.7473e-11	-2755	-670	In isolation
community12	community48	1	2794	304	26188	2.47483e-12	3.07391e-11	-2793	-303	In isolation
community1	community64	20	4049	450	24768	5.59914e-12	6.90688e-11	-4029	-430	In isolation
community11	community23	4	1358	781	27144	6.69484e-12	8.20231e-11	-1354	-777	In isolation
community2	community59	5	10827	84	18371	9.14849e-12	1.11327e-10	-10822	-79	In isolation
community5	community6	60	6397	491	22339	1.00029e-11	1.20908e-10	-6337	-431	In isolation
community3	community56	1	2493	327	26466	1.03598e-11	1.24387e-10	-2492	-326	In isolation
community31	community40	3	864	1133	27287	1.18387e-11	1.41202e-10	-861	-1130	In isolation
community3	community54	3	2491	384	26409	1.21667e-11	1.44159e-10	-2488	-381	In isolation
community10	community12	8	447	2787	26045	1.69005e-11	1.9894e-10	-439	-2779	In isolation
community18	community40	5	972	1131	27179	1.75253e-11	2.04955e-10	-967	-1126	In isolation
community21	community26	2	1010	884	27391	1.78878e-11	2.07845e-10	-1008	-882	In isolation
community11	community25	6	1356	854	27071	1.81773e-11	2.09855e-10	-1350	-848	In isolation
community15	community26	12	1684	874	26717	2.33371e-11	2.67708e-10	-1672	-862	In isolation
community5	community52	1	6456	112	22718	2.70163e-11	3.07951e-10	-6455	-111	In isolation
community1	community7	179	3890	1786	23432	3.14359e-11	3.56076e-10	-3711	-1607	In isolation
community21	community23	1	1011	784	27491	3.31935e-11	3.73634e-10	-1010	-783	In isolation
community53	community79	10	141	79	29057	3.52569e-11	3.94395e-10	-131	-69	In isolation
community30	community7	3	477	1962	26845	3.70944e-11	4.12389e-10	-474	-1959	In isolation
community11	community26	7	1355	879	27046	3.78651e-11	4.18375e-10	-1348	-872	In isolation
community21	community40	6	1006	1130	27145	3.9787e-11	4.3693e-10	-1000	-1124	In isolation
community25	community3	26	834	2468	25959	4.72593e-11	5.15842e-10	-808	-2442	In isolation
community12	community25	32	2763	828	25664	5.96016e-11	6.46641e-10	-2731	-796	In isolation
community12	community43	2	2793	300	26192	7.51518e-11	8.05645e-10	-2791	-298	In isolation
community3	community48	1	2493	304	26489	7.51377e-11	8.05645e-10	-2492	-303	In isolation
community18	community21	4	973	1008	27302	9.6263e-11	1.02586e-09	-969	-1004	In isolation
community74	community76	5	23	27	29232	1.0833e-10	1.14766e-09	-18	-22	In isolation
community3	community67	1	2493	299	26494	1.11002e-10	1.16909e-09	-2492	-298	In isolation
community3	community43	1	2493	301	26492	1.16493e-10	1.21979e-09	-2492	-300	In isolation
community12	community64	10	2785	460	26032	1.21868e-10	1.2687e-09	-2775	-450	In isolation
community2	community29	480	10352	549	17906	1.27395e-10	1.31861e-09	-9872	-69	In isolation
community5	community57	132	6325	226	22604	1.35695e-10	1.39649e-09	-6193	-94	In isolation
community2	community64	109	10723	361	18094	1.50906e-10	1.54421e-09	-10614	-252	In isolation
community1	community55	9	4060	293	24925	1.5957e-10	1.62365e-09	-4051	-284	In isolation
community1	community36	9	4060	294	24924	1.61645e-10	1.63552e-09	-4051	-285	In isolation
community2	community40	523	10309	613	17842	2.1667e-10	2.18001e-09	-9786	-90	In isolation
community23	community40	3	782	1133	27369	2.36071e-10	2.36202e-09	-779	-1130	In isolation
community15	community22	9	1687	723	26868	3.47141e-10	3.44918e-09	-1678	-714	In isolation
community21	community31	3	1009	864	27411	3.48557e-10	3.44918e-09	-1006	-861	In isolation
community21	community7	24	988	1941	26334	3.53511e-10	3.47909e-09	-964	-1917	In isolation
community25	community9	1	859	852	27575	3.59821e-10	3.52195e-09	-858	-851	In isolation
community3	community39	2	2492	314	26479	4.03671e-10	3.9298e-09	-2490	-312	In isolation
community15	community17	1	1695	428	27163	4.16259e-10	4.03055e-09	-1694	-427	In isolation
community15	community62	2	1694	467	27124	4.3014e-10	4.14269e-09	-1692	-465	In isolation
community1	community11	116	3953	1246	23972	5.59115e-10	5.35621e-09	-3837	-1130	In isolation
community11	community40	15	1347	1121	26804	5.80041e-10	5.52727e-09	-1332	-1106	In isolation
community23	community4	2	783	1018	27484	5.83417e-10	5.53018e-09	-781	-1016	In isolation
community29	community40	8	1021	1128	27130	6.15941e-10	5.8079e-09	-1013	-1120	In isolation
community27	community73	8	186	38	29055	6.74637e-10	6.32823e-09	-178	-30	In isolation
community1	community32	48	4021	672	24546	7.61073e-10	7.10203e-09	-3973	-624	In isolation
community1	community45	12	4057	315	24903	8.73131e-10	8.07476e-09	-4045	-303	In isolation
community4	community40	8	1012	1128	27139	8.7428e-10	8.07476e-09	-1004	-1120	In isolation
community32	community7	13	707	1952	26615	9.3731e-10	8.61273e-09	-694	-1939	In isolation
community43	community5	113	189	6344	22641	1.19933e-09	1.09645e-08	-76	-6231	In isolation
community2	community61	61	10771	235	18220	1.41215e-09	1.28449e-08	-10710	-174	In isolation
community22	community40	3	729	1133	27422	1.50796e-09	1.36474e-08	-726	-1130	In isolation
community30	community31	41	439	826	27981	1.64679e-09	1.48293e-08	-398	-785	In isolation
community12	community39	4	2791	312	26180	1.73094e-09	1.55096e-08	-2787	-308	In isolation
community11	community49	26	1336	116	27809	1.95007e-09	1.73865e-08	-1310	-90	In isolation
community44	community5	1	94	6456	22736	2.43906e-09	2.16392e-08	-93	-6455	In isolation
community15	community8	13	1683	800	26791	2.76352e-09	2.43976e-08	-1670	-787	In isolation
community2	community42	49	10783	201	18254	3.11458e-09	2.73628e-08	-10734	-152	In isolation
community12	community28	8	2787	384	26108	3.45445e-09	3.02013e-08	-2779	-376	In isolation
community20	community3	9	454	2485	26339	3.72656e-09	3.22733e-08	-445	-2476	In isolation
community21	community22	2	1010	730	27545	3.72778e-09	3.22733e-08	-1008	-728	In isolation
community31	community9	2	865	851	27569	3.7452e-09	3.22733e-08	-863	-849	In isolation
community12	community45	5	2790	322	26170	3.79674e-09	3.25616e-08	-2785	-317	In isolation
community12	community37	3	2792	277	26215	4.47543e-09	3.82002e-08	-2789	-274	In isolation
community12	community55	4	2791	298	26194	5.16519e-09	4.38798e-08	-2787	-294	In isolation
community18	community26	4	973	882	27428	5.5379e-09	4.68251e-08	-969	-878	In isolation
community15	community64	3	1693	467	27124	5.77208e-09	4.85772e-08	-1690	-464	In isolation
community5	community55	28	6429	274	22556	6.90686e-09	5.7857e-08	-6401	-246	In isolation
community11	community34	10	1352	864	27061	7.0208e-09	5.85392e-08	-1342	-854	In isolation
community11	community58	1	1361	473	27452	7.05454e-09	5.85495e-08	-1360	-472	In isolation
community12	community42	2	2793	248	26244	7.50073e-09	6.19671e-08	-2791	-246	In isolation
community15	community20	3	1693	460	27131	8.31003e-09	6.83396e-08	-1690	-457	In isolation
community12	community58	13	2782	461	26031	8.4867e-09	6.94752e-08	-2769	-448	In isolation
community28	community7	3	389	1962	26933	1.01767e-08	8.29331e-08	-386	-1959	In isolation
community10	community15	3	452	1693	27139	1.1726e-08	9.51284e-08	-449	-1690	In isolation
community3	community35	7	2487	392	26401	1.23428e-08	9.96833e-08	-2480	-385	In isolation
community2	community51	5	10827	65	18390	1.34571e-08	1.08197e-07	-10822	-60	In isolation
community3	community55	3	2491	299	26494	1.71068e-08	1.3693e-07	-2488	-296	In isolation
community22	community9	1	731	852	27703	1.80532e-08	1.43866e-07	-730	-851	In isolation
community15	community57	1	1695	357	27234	1.8583e-08	1.47436e-07	-1694	-356	In isolation
community27	community38	14	180	294	28799	2.10006e-08	1.65887e-07	-166	-280	In isolation
community31	community34	3	864	871	27549	2.1131e-08	1.66187e-07	-861	-868	In isolation
community10	community3	10	445	2484	26348	2.35499e-08	1.84406e-07	-435	-2474	In isolation
community2	community70	16	10816	101	18354	2.46336e-08	1.90869e-07	-10800	-85	In isolation
community12	community50	5	2790	304	26188	2.46932e-08	1.90869e-07	-2785	-299	In isolation
community13	community7	2	339	1963	26983	2.44819e-08	1.90869e-07	-337	-1961	In isolation
community23	community34	2	783	872	27630	2.53967e-08	1.94943e-07	-781	-870	In isolation
community24	community25	1	709	859	27718	2.54368e-08	1.94943e-07	-708	-858	In isolation
community21	community29	8	1004	1021	27254	2.6576e-08	2.02811e-07	-996	-1013	In isolation
community19	community3	5	338	2489	26455	2.72867e-08	2.07356e-07	-333	-2484	In isolation
community29	community32	3	1026	717	27541	2.91818e-08	2.20825e-07	-1023	-714	In isolation
community5	community56	116	6341	212	22618	2.97853e-08	2.24449e-07	-6225	-96	In isolation
community21	community25	5	1007	855	27420	3.50956e-08	2.63363e-07	-1002	-850	In isolation
community67	community7	1	299	1964	27023	3.67231e-08	2.74433e-07	-298	-1963	In isolation
community24	community29	3	707	1026	27551	4.21458e-08	3.13656e-07	-704	-1023	In isolation
community38	community70	11	297	106	28873	4.69982e-08	3.48328e-07	-286	-95	In isolation
community18	community34	5	972	869	27441	4.77247e-08	3.52263e-07	-967	-864	In isolation
community2	community41	52	10780	197	18258	4.81518e-08	3.53965e-07	-10728	-145	In isolation
community12	community67	5	2790	295	26197	4.99426e-08	3.65636e-07	-2785	-290	In isolation
community1	community43	13	4056	289	24929	5.71186e-08	4.1648e-07	-4043	-276	In isolation
community23	community36	27	758	276	28226	6.07914e-08	4.41473e-07	-731	-249	In isolation
community29	community34	6	1023	868	27390	6.36758e-08	4.60563e-07	-1017	-862	In isolation
community12	community61	5	2790	291	26201	7.2049e-08	5.19041e-07	-2785	-286	In isolation
community18	community29	8	969	1021	27289	7.24162e-08	5.19608e-07	-961	-1013	In isolation
community29	community4	9	1020	1011	27247	8.59115e-08	6.13995e-07	-1011	-1002	In isolation
community18	community22	3	974	729	27581	9.39516e-08	6.68802e-07	-971	-726	In isolation
community12	community41	3	2792	246	26246	9.53624e-08	6.73521e-07	-2789	-243	In isolation
community57	community7	3	355	1962	26967	9.5138e-08	6.73521e-07	-352	-1959	In isolation
community11	community64	2	1360	468	27457	9.94206e-08	6.9944e-07	-1358	-466	In isolation
community22	community34	2	730	872	27683	1.1196e-07	7.8459e-07	-728	-870	In isolation
community5	community59	2	6455	87	22743	1.18465e-07	8.26956e-07	-6453	-85	In isolation
community1	community62	29	4040	440	24778	1.21248e-07	8.43118e-07	-4011	-411	In isolation
community49	community5	8	134	6449	22696	1.25301e-07	8.6795e-07	-126	-6441	In isolation
community27	community55	13	181	289	28804	1.27854e-07	8.82241e-07	-168	-276	In isolation
community12	community46	3	2792	239	26253	1.32638e-07	9.11759e-07	-2789	-236	In isolation
community22	community29	4	728	1025	27530	1.33869e-07	9.16724e-07	-724	-1021	In isolation
community3	community46	2	2492	240	26553	1.87048e-07	1.27604e-06	-2490	-238	In isolation
community24	community40	5	705	1131	27446	1.87942e-07	1.2773e-06	-700	-1126	In isolation
community12	community14	21	2774	541	25951	2.00443e-07	1.35713e-06	-2753	-520	In isolation
community53	community68	5	146	21	29115	2.05477e-07	1.38601e-06	-141	-16	In isolation
community2	community46	52	10780	190	18265	2.13686e-07	1.436e-06	-10728	-138	In isolation
community26	community29	7	879	1022	27379	2.2538e-07	1.50896e-06	-872	-1015	In isolation
community23	community9	3	782	850	27652	2.62951e-07	1.75398e-06	-779	-847	In isolation
community2	community62	121	10711	348	18107	2.82963e-07	1.8805e-06	-10590	-227	In isolation
community2	community73	2	10830	44	18411	2.9974e-07	1.98468e-06	-10828	-42	In isolation
community12	community54	11	2784	376	26116	3.20395e-07	2.11367e-06	-2773	-365	In isolation
community18	community31	6	971	861	27449	3.71345e-07	2.44085e-06	-965	-855	In isolation
community15	community36	1	1695	302	27289	4.02191e-07	2.63399e-06	-1694	-301	In isolation
community3	community62	13	2481	456	26337	4.31479e-07	2.81556e-06	-2468	-443	In isolation
community21	community34	7	1005	867	27408	4.35132e-07	2.82914e-06	-998	-860	In isolation
community3	community4	134	2360	886	25907	4.37386e-07	2.83357e-06	-2226	-752	In isolation
community34	community40	9	865	1127	27286	4.39236e-07	2.83535e-06	-856	-1118	In isolation
community61	community7	2	294	1963	27028	5.00722e-07	3.22071e-06	-292	-1961	In isolation
community14	community3	18	544	2476	26249	5.35587e-07	3.43271e-06	-526	-2458	In isolation
community26	community31	5	881	862	27539	5.37928e-07	3.43503e-06	-876	-857	In isolation
community22	community26	3	729	883	27672	5.39764e-07	3.43503e-06	-726	-880	In isolation
community15	community43	1	1695	301	27290	6.33106e-07	4.01487e-06	-1694	-300	In isolation
community12	community57	10	2785	348	26144	7.55637e-07	4.7751e-06	-2775	-338	In isolation
community5	community51	1	6456	69	22761	7.98334e-07	5.02727e-06	-6455	-68	In isolation
community1	community67	15	4054	285	24933	8.41784e-07	5.28242e-06	-4039	-270	In isolation
community1	community19	19	4050	324	24894	8.75248e-07	5.47334e-06	-4031	-305	In isolation
community6	community79	11	540	78	28658	9.19316e-07	5.72903e-06	-529	-67	In isolation
community3	community41	3	2491	246	26547	9.75539e-07	6.05843e-06	-2488	-243	In isolation
community14	community21	2	560	1010	27715	9.83014e-07	6.08388e-06	-558	-1008	In isolation
community40	community6	3	1133	548	27603	1.06322e-06	6.55775e-06	-1130	-545	In isolation
community12	community47	6	2789	276	26216	1.09841e-06	6.75165e-06	-2783	-270	In isolation
community12	community9	43	2752	810	25682	1.10423e-06	6.76435e-06	-2709	-767	In isolation
community25	community34	5	855	869	27558	1.11601e-06	6.81332e-06	-850	-864	In isolation
community22	community31	3	729	864	27691	1.18917e-06	7.23543e-06	-726	-861	In isolation
community19	community7	4	339	1961	26983	1.20562e-06	7.31086e-06	-335	-1957	In isolation
community15	community23	17	1679	768	26823	1.22127e-06	7.38089e-06	-1662	-751	In isolation
community11	community9	72	1290	781	27144	1.28036e-06	7.71212e-06	-1218	-709	In isolation
community1	community16	25	4044	377	24841	1.33898e-06	8.03835e-06	-4019	-352	In isolation
community18	community8	6	971	807	27503	1.36597e-06	8.17316e-06	-965	-801	In isolation
community1	community47	14	4055	268	24950	1.50673e-06	8.98552e-06	-4041	-254	In isolation
community59	community74	4	85	24	29174	1.54273e-06	9.16984e-06	-81	-20	In isolation
community29	community62	1	1028	468	27790	1.56183e-06	9.25282e-06	-1027	-467	In isolation
community31	community6	1	866	550	27870	1.59037e-06	9.39099e-06	-865	-549	In isolation
community17	community40	1	428	1135	27723	1.59635e-06	9.39552e-06	-427	-1134	In isolation
community24	community34	3	707	871	27706	1.64737e-06	9.66419e-06	-704	-868	In isolation
community38	community7	3	305	1962	27017	1.69712e-06	9.92377e-06	-302	-1959	In isolation
community18	community38	28	949	280	28030	1.86673e-06	1.08802e-05	-921	-252	In isolation
community15	community37	1	1695	279	27312	1.91096e-06	1.11021e-05	-1694	-278	In isolation
community12	community8	41	2754	772	25720	2.09158e-06	1.21123e-05	-2713	-731	In isolation
community11	community32	10	1352	710	27215	2.34524e-06	1.35377e-05	-1342	-700	In isolation
community18	community9	7	970	846	27464	2.37543e-06	1.36682e-05	-963	-839	In isolation
community15	community39	2	1694	314	27277	2.45271e-06	1.40679e-05	-1692	-312	In isolation
community11	community14	6	1356	556	27369	2.46399e-06	1.40878e-05	-1350	-550	In isolation
community23	community3	33	752	2461	26041	2.62622e-06	1.49678e-05	-719	-2428	In isolation
community11	community28	2	1360	390	27535	2.69338e-06	1.53021e-05	-1358	-388	In isolation
community3	community47	5	2489	277	26516	2.71431e-06	1.53725e-05	-2484	-272	In isolation
community11	community21	19	1343	993	26932	2.9445e-06	1.66239e-05	-1324	-974	In isolation
community11	community30	4	1358	476	27449	2.96111e-06	1.66655e-05	-1354	-472	In isolation
community18	community6	2	975	549	27761	3.09238e-06	1.73501e-05	-973	-547	In isolation
community16	community3	11	391	2483	26402	3.36168e-06	1.88024e-05	-380	-2472	In isolation
community15	community58	7	1689	467	27124	3.7797e-06	2.1075e-05	-1682	-460	In isolation
community11	community62	4	1358	465	27460	4.14511e-06	2.30412e-05	-1354	-461	In isolation
community18	community32	5	972	715	27595	4.27476e-06	2.36888e-05	-967	-710	In isolation
community12	community36	8	2787	295	26197	4.38066e-06	2.42011e-05	-2779	-287	In isolation
community22	community32	2	730	718	27837	4.58337e-06	2.52436e-05	-728	-716	In isolation
community12	community20	18	2777	445	26047	4.6604e-06	2.55896e-05	-2759	-427	In isolation
community18	community4	11	966	1009	27301	4.74751e-06	2.59887e-05	-955	-998	In isolation
community10	community18	1	454	976	27856	4.83552e-06	2.63902e-05	-453	-975	In isolation
community18	community20	1	976	462	27848	5.07728e-06	2.76259e-05	-975	-461	In isolation
community2	community72	3	10829	41	18414	6.02171e-06	3.26659e-05	-10826	-38	In isolation
community12	community6	24	2771	527	25965	6.7804e-06	3.66712e-05	-2747	-503	In isolation
community39	community7	4	312	1961	27010	7.08543e-06	3.82062e-05	-308	-1957	In isolation
community15	community61	2	1694	294	27297	7.43481e-06	3.99704e-05	-1692	-292	In isolation
community15	community56	3	1693	325	27266	7.75348e-06	4.15596e-05	-1690	-322	In isolation
community18	community37	25	952	255	28055	8.94843e-06	4.78223e-05	-927	-230	In isolation
community23	community24	3	782	707	27795	9.41426e-06	5.0163e-05	-779	-704	In isolation
community41	community7	2	247	1963	27075	9.76175e-06	5.18611e-05	-245	-1961	In isolation
community23	community32	3	782	717	27785	1.00506e-05	5.32387e-05	-779	-714	In isolation
community47	community7	3	279	1962	27043	1.07739e-05	5.69025e-05	-276	-1959	In isolation
community12	community16	15	2780	387	26105	1.12048e-05	5.90055e-05	-2765	-372	In isolation
community1	community8	72	3997	741	24477	1.15348e-05	6.05663e-05	-3925	-669	In isolation
community11	community57	2	1360	356	27569	1.15862e-05	6.06591e-05	-1358	-354	In isolation
community11	community16	3	1359	399	27526	1.22017e-05	6.36964e-05	-1356	-396	In isolation
community29	community64	2	1027	468	27790	1.23695e-05	6.43859e-05	-1025	-466	In isolation
community29	community58	2	1027	472	27786	1.25327e-05	6.50471e-05	-1025	-470	In isolation
community54	community7	7	380	1958	26942	1.30727e-05	6.76552e-05	-373	-1951	In isolation
community27	community70	7	187	110	28983	1.34676e-05	6.9499e-05	-180	-103	In isolation
community15	community41	1	1695	248	27343	1.35831e-05	6.98947e-05	-1694	-247	In isolation
community48	community7	4	301	1961	27021	1.44006e-05	7.38904e-05	-297	-1957	In isolation
community15	community47	2	1694	280	27311	1.53824e-05	7.87036e-05	-1692	-278	In isolation
community17	community18	1	428	976	27882	1.5821e-05	8.07182e-05	-427	-975	In isolation
community3	community51	18	2476	52	26741	1.62483e-05	8.24316e-05	-2458	-34	In isolation
community30	community34	1	479	873	27934	1.62138e-05	8.24316e-05	-478	-872	In isolation
community48	community8	23	282	790	28192	1.6749e-05	8.47331e-05	-259	-767	In isolation
community1	community28	27	4042	365	24853	1.75314e-05	8.8443e-05	-4015	-338	In isolation
community20	community29	2	461	1027	27797	1.80129e-05	9.0618e-05	-459	-1025	In isolation
community40	community62	3	1133	466	27685	1.80736e-05	9.067e-05	-1130	-463	In isolation
community22	community8	4	728	809	27746	1.81253e-05	9.0677e-05	-724	-805	In isolation
community25	community6	2	858	549	27878	1.8279e-05	9.11924e-05	-856	-547	In isolation
community15	community46	1	1695	241	27350	1.96875e-05	9.79478e-05	-1694	-240	In isolation
community28	community38	15	377	293	28602	2.01269e-05	9.9858e-05	-362	-278	In isolation
community1	community10	96	3973	359	24859	2.11568e-05	0.00010468	-3877	-263	In isolation
community15	community19	4	1692	339	27252	2.13043e-05	0.000105121	-1688	-335	In isolation
community28	community4	1	391	1019	27876	2.15284e-05	0.000105936	-390	-1018	In isolation
community22	community4	7	725	1013	27542	2.20327e-05	0.000108122	-718	-1006	In isolation
community26	community32	5	881	715	27686	2.22605e-05	0.000108943	-876	-710	In isolation
community23	community8	5	780	808	27694	2.23316e-05	0.000108995	-775	-803	In isolation
community14	community24	1	561	709	28016	2.24901e-05	0.000109472	-560	-708	In isolation
community22	community6	1	731	550	28005	2.27865e-05	0.000110616	-730	-549	In isolation
community31	community62	1	866	468	27952	2.31167e-05	0.000111917	-865	-467	In isolation
community31	community64	1	866	469	27951	2.33707e-05	0.000112844	-865	-468	In isolation
community11	community54	3	1359	384	27541	2.51102e-05	0.000120918	-1356	-381	In isolation
community12	community56	11	2784	317	26175	2.59565e-05	0.00012466	-2773	-306	In isolation
community1	community39	20	4049	296	24922	2.651e-05	0.000126938	-4029	-276	In isolation
community10	community29	2	453	1027	27805	2.65717e-05	0.000126938	-451	-1025	In isolation
community2	community69	34	10798	17	18438	2.76148e-05	0.000131572	-10764	17	Closely
community3	community58	17	2477	457	26336	2.84695e-05	0.000135287	-2460	-440	In isolation
community1	community34	81	3988	793	24425	2.91834e-05	0.000138314	-3907	-712	In isolation
community21	community32	7	1005	713	27562	2.96661e-05	0.000140233	-998	-706	In isolation
community32	community34	5	715	869	27698	3.13144e-05	0.000147637	-710	-864	In isolation
community4	community54	1	1019	386	27881	3.2457e-05	0.000152511	-1018	-385	In isolation
community30	community8	1	479	812	27995	3.25176e-05	0.000152511	-478	-811	In isolation
community1	community46	13	4056	229	24989	3.27961e-05	0.000153418	-4043	-216	In isolation
community20	community25	1	462	859	27965	3.5021e-05	0.000163401	-461	-858	In isolation
community45	community9	24	303	829	28131	3.72128e-05	0.000173179	-279	-805	In isolation
community10	community11	5	450	1357	27475	4.0889e-05	0.000189797	-445	-1352	In isolation
community29	community49	16	1013	126	28132	4.14503e-05	0.000191907	-997	-110	In isolation
community32	community9	5	715	848	27719	4.31711e-05	0.000199362	-710	-843	In isolation
community3	community36	8	2486	295	26498	4.41465e-05	0.000203345	-2478	-287	In isolation
community2	community47	72	10760	210	18245	5.18053e-05	0.000238014	-10688	-138	In isolation
community2	community63	14	10818	70	18385	5.97817e-05	0.000273961	-10804	-56	In isolation
community15	community54	6	1690	381	27210	6.24277e-05	0.000285361	-1684	-375	In isolation
community40	community45	1	1135	326	27825	6.64519e-05	0.000302222	-1134	-325	In isolation
community29	community57	1	1028	357	27901	6.6407e-05	0.000302222	-1027	-356	In isolation
community24	community7	23	687	1942	26635	6.99986e-05	0.00031755	-664	-1919	In isolation
community11	community39	2	1360	314	27611	7.08258e-05	0.000320495	-1358	-312	In isolation
community16	community7	9	393	1956	26929	7.45912e-05	0.000336689	-384	-1947	In isolation
community22	community59	10	722	79	28476	7.69162e-05	0.000346315	-712	-69	In isolation
community1	community53	6	4063	145	25073	8.35316e-05	0.000375163	-4057	-139	In isolation
community16	community55	14	388	288	28597	8.41346e-05	0.000376931	-374	-274	In isolation
community12	community38	11	2784	297	26195	8.45409e-05	0.000377812	-2773	-286	In isolation
community40	community64	4	1132	466	27685	9.33903e-05	0.000416326	-1128	-462	In isolation
community7	community9	87	1878	766	26556	9.43004e-05	0.000418286	-1791	-679	In isolation
community13	community6	18	323	533	28413	9.45267e-05	0.000418286	-305	-515	In isolation
community37	community47	11	269	271	28736	9.43637e-05	0.000418286	-258	-260	In isolation
community40	community58	4	1132	470	27681	9.55382e-05	0.000421726	-1128	-466	In isolation
community29	community36	25	1004	278	27980	9.65387e-05	0.000425101	-979	-253	In isolation
community10	community23	1	454	784	28048	0.0001002	0.000440148	-453	-783	In isolation
community17	community5	129	300	6328	22530	0.000101849	0.0004463	-171	-6199	In isolation
community44	community74	3	92	25	29167	0.000102124	0.000446419	-89	-22	In isolation
community21	community62	3	1009	466	27809	0.00010485	0.000457225	-1006	-463	In isolation
community14	community9	3	559	850	27875	0.000109335	0.000474489	-556	-847	In isolation
community34	community58	2	872	472	27941	0.000109277	0.000474489	-870	-470	In isolation
community27	community37	9	185	271	28822	0.000111903	0.000483302	-176	-262	In isolation
community26	community58	2	884	472	27929	0.000111667	0.000483302	-882	-470	In isolation
community33	community7	1	174	1964	27148	0.000112735	0.000485731	-173	-1963	In isolation
community15	community35	7	1689	392	27199	0.000129616	0.000557132	-1682	-385	In isolation
community13	community21	1	340	1011	27935	0.000139819	0.000599559	-339	-1010	In isolation
community36	community58	15	288	459	28525	0.000141514	0.000605385	-273	-444	In isolation
community13	community4	1	340	1019	27927	0.000142019	0.000606103	-339	-1018	In isolation
community11	community61	2	1360	294	27631	0.000143318	0.000610201	-1358	-292	In isolation
community22	community62	1	731	468	28087	0.000144683	0.00061456	-730	-467	In isolation
community30	community32	1	479	719	28088	0.000146023	0.000618793	-478	-718	In isolation
community12	community49	2	2793	140	26352	0.000146653	0.000620004	-2791	-138	In isolation
community10	community21	3	452	1009	27823	0.000147686	0.000622909	-449	-1006	In isolation
community14	community7	17	545	1948	26777	0.000160597	0.000675784	-528	-1931	In isolation
community34	community62	2	872	467	27946	0.000161645	0.000678606	-870	-465	In isolation
community47	community5	37	245	6420	22585	0.000162541	0.000680782	-208	-6383	In isolation
community34	community64	2	872	468	27945	0.000163085	0.000681477	-870	-466	In isolation
community22	community23	5	727	780	27775	0.000165952	0.00069185	-722	-775	In isolation
community10	community6	21	434	530	28302	0.000169519	0.000705087	-413	-509	In isolation
community10	community40	4	451	1132	27700	0.000189017	0.000784378	-447	-1128	In isolation
community1	community13	25	4044	316	24902	0.000198531	0.000821965	-4019	-291	In isolation
community31	community8	8	859	805	27615	0.000206283	0.000850767	-851	-797	In isolation
community54	community9	1	386	852	28048	0.000206433	0.000850767	-385	-851	In isolation
community28	community9	1	391	852	28043	0.000208379	0.000856829	-390	-851	In isolation
community10	community22	1	454	731	28101	0.00021014	0.000862102	-453	-730	In isolation
community17	community23	1	428	784	28074	0.000213865	0.000875387	-427	-783	In isolation
community29	community8	11	1018	802	27456	0.000214958	0.000877868	-1007	-791	In isolation
community38	community47	11	297	271	28708	0.00021659	0.000882532	-286	-260	In isolation
community16	community18	2	400	975	27910	0.000219633	0.000892911	-398	-973	In isolation
community3	community77	1	2493	131	26662	0.000221222	0.000897344	-2492	-130	In isolation
community20	community31	2	461	865	27959	0.00023873	0.000966184	-459	-863	In isolation
community12	community33	4	2791	171	26321	0.000247611	0.000999881	-2787	-167	In isolation
community40	community47	1	1135	281	27870	0.000285654	0.00115092	-1134	-280	In isolation
community36	community7	6	297	1959	27025	0.000286508	0.00115179	-291	-1953	In isolation
community21	community39	1	1011	315	27960	0.000291679	0.00116996	-1010	-314	In isolation
community39	community4	1	315	1019	27952	0.000292992	0.00117122	-314	-1018	In isolation
community18	community45	1	976	326	27984	0.000293293	0.00117122	-975	-325	In isolation
community11	community47	2	1360	280	27645	0.00029575	0.00117582	-1358	-278	In isolation
community12	community52	1	2794	112	26380	0.000295289	0.00117582	-2793	-111	In isolation
community13	community74	4	337	24	28922	0.000296458	0.00117604	-333	-20	In isolation
community29	community39	1	1028	315	27943	0.000297821	0.00117885	-1027	-314	In isolation
community10	community24	1	454	709	28123	0.000306582	0.00121086	-453	-708	In isolation
community45	community7	7	320	1958	27002	0.000313559	0.00123571	-313	-1951	In isolation
community17	community26	2	427	884	27974	0.000316006	0.00124264	-425	-882	In isolation
community15	community16	8	1688	394	27197	0.000336289	0.00131951	-1680	-386	In isolation
community30	community4	4	476	1016	27791	0.000361824	0.00141662	-472	-1012	In isolation
community1	community65	4	4065	112	25106	0.000369913	0.00144515	-4061	-108	In isolation
community48	community5	94	211	6363	22619	0.000375387	0.00146336	-117	-6269	In isolation
community27	community3	4	190	2490	26603	0.000391487	0.00152282	-186	-2486	In isolation
community44	community72	3	92	41	29151	0.00039763	0.00154339	-89	-38	In isolation
community13	community15	6	335	1690	27256	0.00040503	0.00156873	-329	-1684	In isolation
community13	community53	8	333	143	28803	0.000408656	0.00157938	-325	-135	In isolation
community29	community67	1	1028	299	27959	0.000420965	0.00162346	-1027	-298	In isolation
community29	community43	1	1028	301	27957	0.000423071	0.0016281	-1027	-300	In isolation
community38	community4	1	307	1019	27960	0.000433084	0.00166308	-306	-1018	In isolation
community37	community40	1	279	1135	27872	0.000444112	0.00169944	-278	-1134	In isolation
community23	community35	1	784	398	28104	0.00044444	0.00169944	-783	-397	In isolation
community3	community59	18	2476	71	26722	0.00044686	0.00170507	-2458	-53	In isolation
community6	community8	30	521	783	27953	0.000535666	0.00203961	-491	-753	In isolation
community11	community48	3	1359	302	27623	0.00054465	0.00206944	-1356	-299	In isolation
community11	community24	15	1347	695	27230	0.000551994	0.00209293	-1332	-680	In isolation
community12	community19	15	2780	328	26164	0.000563744	0.00213299	-2765	-313	In isolation
community26	community64	3	883	467	27934	0.000584886	0.00220372	-880	-464	In isolation
community26	community62	3	883	466	27935	0.000583932	0.00220372	-880	-463	In isolation
community29	community6	6	1023	545	27713	0.000614505	0.00230567	-1017	-539	In isolation
community18	community48	1	976	304	28006	0.000614128	0.00230567	-975	-303	In isolation
community23	community26	9	776	877	27625	0.000671974	0.00251606	-767	-868	In isolation
community18	community58	4	973	470	27840	0.000690107	0.0025786	-969	-466	In isolation
community6	community9	4	547	849	27887	0.000728419	0.00271611	-543	-845	In isolation
community26	community4	14	872	1006	27395	0.000759293	0.00282539	-858	-992	In isolation
community46	community5	76	166	6381	22664	0.000764915	0.00284044	-90	-6305	In isolation
community51	community55	5	65	297	28920	0.000789513	0.00292575	-60	-292	In isolation
community11	community55	3	1359	299	27626	0.000793123	0.00293309	-1356	-296	In isolation
community53	community7	1	150	1964	27172	0.000806509	0.00297648	-149	-1963	In isolation
community12	community27	6	2789	188	26304	0.000827197	0.00304659	-2783	-182	In isolation
community26	community34	11	875	863	27538	0.000862869	0.00317148	-864	-852	In isolation
community29	community9	49	980	804	27454	0.000870548	0.00319319	-931	-755	In isolation
community19	community6	16	327	535	28409	0.000873474	0.00319741	-311	-519	In isolation
community40	community48	2	1134	303	27848	0.000876486	0.00320193	-1132	-301	In isolation
community21	community47	1	1011	281	27994	0.000881248	0.00321281	-1010	-280	In isolation
community1	community77	6	4063	126	25092	0.000884717	0.00321894	-4057	-120	In isolation
community1	community33	10	4059	165	25053	0.000896997	0.00325048	-4049	-155	In isolation
community18	community61	1	976	295	28015	0.000896304	0.00325048	-975	-294	In isolation
community31	community56	1	866	327	28093	0.000898956	0.00325105	-865	-326	In isolation
community13	community29	2	339	1027	27919	0.000910688	0.00327396	-337	-1025	In isolation
community31	community35	2	865	397	28023	0.000907636	0.00327396	-863	-395	In isolation
community26	community45	1	885	326	28075	0.000910746	0.00327396	-884	-325	In isolation
community13	community9	1	340	852	28094	0.000922541	0.00330975	-339	-851	In isolation
community3	community50	11	2483	298	26495	0.000932323	0.0033382	-2472	-287	In isolation
community18	community43	1	976	301	28009	0.000949751	0.00338713	-975	-300	In isolation
community18	community55	1	976	301	28009	0.000949751	0.00338713	-975	-300	In isolation
community19	community25	1	342	859	28085	0.000964507	0.00343296	-341	-858	In isolation
community16	community22	1	401	731	28154	0.000969456	0.00344377	-400	-730	In isolation
community1	community66	1	4068	64	25154	0.00104083	0.00369003	-4067	-63	In isolation
community4	community7	95	925	1870	26397	0.001137	0.00402305	-830	-1775	In isolation
community10	community31	3	452	864	27968	0.00115057	0.00406311	-449	-861	In isolation
community29	community54	3	1026	384	27874	0.0011543	0.00406827	-1023	-381	In isolation
community40	community8	15	1121	798	27353	0.00119066	0.00418824	-1106	-783	In isolation
community27	community46	7	187	235	28858	0.00120079	0.00421564	-180	-228	In isolation
community11	community41	2	1360	247	27678	0.00122454	0.00429066	-1358	-245	In isolation
community40	community46	1	1135	241	27910	0.00125027	0.00437229	-1134	-240	In isolation
community13	community18	2	339	975	27971	0.0012668	0.00442153	-337	-973	In isolation
community11	community45	4	1358	323	27602	0.00129025	0.004486	-1354	-319	In isolation
community31	community54	2	865	385	28035	0.00128952	0.004486	-863	-383	In isolation
community10	community8	25	430	788	28044	0.00129675	0.00449991	-405	-763	In isolation
community40	community43	2	1134	300	27851	0.00131846	0.00456044	-1132	-298	In isolation
community24	community54	1	709	386	28191	0.00131926	0.00456044	-708	-385	In isolation
community40	community41	1	1135	248	27903	0.00132387	0.00456761	-1134	-247	In isolation
community28	community40	4	388	1132	27763	0.00133297	0.00459021	-384	-1128	In isolation
community24	community28	1	709	391	28186	0.00133956	0.00460409	-708	-390	In isolation
community27	community7	3	191	1962	27131	0.00135189	0.00463763	-188	-1959	In isolation
community28	community3	52	340	2442	26453	0.00135602	0.00464234	-288	-2390	In isolation
community32	community58	2	718	472	28095	0.00135842	0.00464234	-716	-470	In isolation
community34	community9	11	863	842	27571	0.00147589	0.00503423	-852	-831	In isolation
community20	community40	6	457	1130	27694	0.00149556	0.0050917	-451	-1124	In isolation
community2	community34	279	10553	595	17860	0.00154201	0.00523993	-10274	-316	In isolation
community18	community54	3	974	384	27926	0.00157375	0.00533772	-971	-381	In isolation
community1	community57	30	4039	328	24890	0.00157795	0.0053419	-4009	-298	In isolation
community14	community29	7	555	1022	27703	0.00159112	0.00537636	-548	-1015	In isolation
community12	community77	3	2792	129	26363	0.00163091	0.00550051	-2789	-126	In isolation
community15	community27	2	1694	192	27399	0.00166203	0.00559498	-1692	-190	In isolation
community17	community6	18	411	533	28325	0.00170294	0.005722	-393	-515	In isolation
community4	community8	13	1007	800	27467	0.00176296	0.00591265	-994	-787	In isolation
community1	community20	42	4027	421	24797	0.00179467	0.00600781	-3985	-379	In isolation
community36	community63	5	298	79	28905	0.00181776	0.00607383	-293	-74	In isolation
community50	community7	8	301	1957	27021	0.00185128	0.00617436	-293	-1949	In isolation
community31	community55	1	866	301	28119	0.00186751	0.00621698	-865	-300	In isolation
community38	community9	1	307	852	28127	0.00187116	0.00621763	-306	-851	In isolation
community26	community67	1	885	299	28102	0.0018816	0.00624082	-884	-298	In isolation
community12	community7	149	2646	1816	24676	0.0019124	0.00631108	-2497	-1667	In isolation
community32	community4	11	709	1009	27558	0.001917	0.00631108	-698	-998	In isolation
community15	community38	6	1690	302	27289	0.0019173	0.00631108	-1684	-296	In isolation
community12	community53	4	2791	147	26345	0.00192158	0.00631108	-2787	-143	In isolation
community14	community64	1	561	469	28256	0.00192114	0.00631108	-560	-468	In isolation
community30	community6	1	479	550	28257	0.00192381	0.00631108	-478	-549	In isolation
community39	community9	1	315	852	28119	0.00194421	0.00636641	-314	-851	In isolation
community34	community50	1	873	308	28105	0.00194988	0.00637337	-872	-307	In isolation
community3	community38	12	2482	296	26497	0.00195751	0.00638673	-2470	-284	In isolation
community14	community2	173	389	10659	18066	0.00199845	0.00648522	-216	-10486	In isolation
community27	community40	17	177	1119	27974	0.00199455	0.00648522	-160	-1102	In isolation
community16	community66	5	397	60	28825	0.0019985	0.00648522	-392	-55	In isolation
community19	community8	20	323	793	28151	0.00226038	0.00732185	-303	-773	In isolation
community15	community25	30	1666	830	26761	0.00230594	0.00745601	-1636	-800	In isolation
community11	community4	28	1334	992	26933	0.00236688	0.00763935	-1306	-964	In isolation
community7	community77	1	1964	131	27191	0.00239079	0.00770269	-1963	-130	In isolation
community48	community68	3	302	23	28959	0.00243488	0.00783074	-299	-20	In isolation
community18	community39	2	975	314	27996	0.00253011	0.0081225	-973	-312	In isolation
community34	community57	2	872	356	28057	0.00257853	0.00826323	-870	-354	In isolation
community16	community23	2	400	783	28102	0.00263994	0.00844499	-398	-781	In isolation
community18	community62	5	972	464	27846	0.00265872	0.00847823	-967	-459	In isolation
community4	community41	1	1019	248	28019	0.00265974	0.00847823	-1018	-247	In isolation
community26	community47	1	885	281	28120	0.00268301	0.00853729	-884	-280	In isolation
community10	community4	5	450	1015	27817	0.00269899	0.00857275	-445	-1010	In isolation
community38	community8	1	307	812	28167	0.00270368	0.00857275	-306	-811	In isolation
community29	community42	1	1028	249	28009	0.00271582	0.00859611	-1027	-248	In isolation
community7	community8	34	1931	779	26543	0.00272865	0.00862158	-1897	-745	In isolation
community31	community61	1	866	295	28125	0.0027567	0.00869495	-865	-294	In isolation
community14	community18	7	555	970	27755	0.00279759	0.00880849	-548	-963	In isolation
community34	community61	1	873	295	28118	0.00280909	0.00881388	-872	-294	In isolation
community10	community14	1	454	561	28271	0.00280689	0.00881388	-453	-560	In isolation
community32	community57	1	719	357	28210	0.00282673	0.00885381	-718	-356	In isolation
community25	community43	1	859	301	28126	0.00284643	0.00890004	-858	-300	In isolation
community58	community65	7	467	109	28704	0.00285686	0.00890349	-460	-102	In isolation
community31	community67	1	866	299	28121	0.00285742	0.00890349	-865	-298	In isolation
community2	community25	360	10472	500	17955	0.00291174	0.00905706	-10112	-140	In isolation
community1	community24	72	3997	638	24580	0.00296269	0.00919966	-3925	-566	In isolation
community44	community59	3	92	86	29106	0.00306892	0.00951313	-89	-83	In isolation
community45	community8	19	308	794	28166	0.00314706	0.00973859	-289	-775	In isolation
community1	community49	8	4061	134	25084	0.00316668	0.00978249	-4053	-126	In isolation
community20	community23	3	460	782	28042	0.00320066	0.00987054	-457	-779	In isolation
community42	community7	6	244	1959	27078	0.00327099	0.0100702	-238	-1953	In isolation
community2	community23	330	10502	455	18000	0.00344268	0.0105807	-10172	-125	In isolation
community11	community56	5	1357	323	27602	0.00345468	0.0105994	-1352	-318	In isolation
community15	community49	1	1695	141	27450	0.00346354	0.0106086	-1694	-140	In isolation
community21	community30	29	983	451	27824	0.00353321	0.0108036	-954	-422	In isolation
community13	community34	2	339	872	28074	0.00360601	0.0110075	-337	-870	In isolation
community22	community25	9	723	851	27704	0.00363421	0.0110748	-714	-842	In isolation
community19	community26	2	341	884	28060	0.00368423	0.0112083	-339	-882	In isolation
community23	community54	2	783	385	28117	0.00371634	0.0112869	-781	-383	In isolation
community14	community34	6	556	868	27857	0.00372904	0.0113064	-550	-862	In isolation
community1	community63	3	4066	81	25137	0.00381157	0.0115372	-4063	-78	In isolation
community23	community28	2	783	390	28112	0.00384787	0.0116276	-781	-388	In isolation
community21	community46	1	1011	241	28034	0.00388937	0.0117333	-1010	-240	In isolation
community23	community48	1	784	304	28198	0.00389792	0.0117394	-783	-303	In isolation
community23	community50	1	784	308	28194	0.0039316	0.011821	-783	-307	In isolation
community13	community24	1	340	709	28237	0.0039501	0.0118569	-339	-708	In isolation
community14	community17	1	561	428	28297	0.00397232	0.0119037	-560	-427	In isolation
community34	community47	1	873	281	28132	0.00400724	0.0119885	-872	-280	In isolation
community2	community39	142	10690	174	18281	0.00402562	0.0120234	-10548	-32	In isolation
community29	community46	1	1028	241	28017	0.00404817	0.0120708	-1027	-240	In isolation
community26	community37	1	885	279	28122	0.00407131	0.0121197	-884	-278	In isolation
community3	community70	2	2492	115	26678	0.00412479	0.0122587	-2490	-113	In isolation
community25	community8	11	849	802	27625	0.00422789	0.0125444	-838	-791	In isolation
community28	community34	3	389	871	28024	0.00425668	0.012609	-386	-868	In isolation
community40	community50	3	1133	306	27845	0.00426384	0.0126095	-1130	-303	In isolation
community10	community7	16	439	1949	26883	0.00439445	0.0129744	-423	-1933	In isolation
community42	community5	37	213	6420	22617	0.00451996	0.0133232	-176	-6383	In isolation
community16	community26	23	379	863	28022	0.00459378	0.0135186	-356	-840	In isolation
community36	community66	4	299	61	28923	0.00463443	0.013616	-295	-57	In isolation
community21	community54	4	1008	383	27892	0.00464299	0.0136189	-1004	-379	In isolation
community1	community9	91	3978	762	24456	0.00487714	0.0142593	-3887	-671	In isolation
community15	community33	2	1694	173	27418	0.00487376	0.0142593	-1692	-171	In isolation
community14	community4	8	554	1012	27713	0.00489258	0.0142813	-546	-1004	In isolation
community23	community6	5	780	546	27956	0.0049261	0.0143558	-775	-541	In isolation
community34	community56	2	872	326	28087	0.00507423	0.0147636	-870	-324	In isolation
community16	community24	2	400	708	28177	0.00513835	0.0149261	-398	-706	In isolation
community56	community7	10	318	1955	27004	0.00522661	0.015158	-308	-1945	In isolation
community22	community35	2	730	397	28158	0.00524552	0.0151884	-728	-395	In isolation
community8	community9	11	802	842	27632	0.00557615	0.0161198	-791	-831	In isolation
community47	community8	1	281	812	28193	0.00559407	0.0161457	-280	-811	In isolation
community22	community39	1	731	315	28240	0.00567875	0.0163639	-730	-314	In isolation
community40	community61	3	1133	293	27858	0.00580274	0.0166895	-1130	-290	In isolation
community21	community45	3	1009	324	27951	0.00581027	0.0166895	-1006	-321	In isolation
community18	community19	3	974	340	27970	0.00587263	0.0168417	-971	-337	In isolation
community32	community56	1	719	327	28240	0.00591021	0.0169226	-718	-326	In isolation
community23	community55	1	784	301	28201	0.00593824	0.0169758	-783	-300	In isolation
community32	community62	3	717	466	28101	0.00606384	0.0173074	-714	-463	In isolation
community25	community29	16	844	1013	27414	0.0060997	0.0173548	-828	-997	In isolation
community32	community64	3	717	467	28100	0.00609053	0.0173548	-714	-464	In isolation
community46	community7	6	236	1959	27086	0.00612603	0.0174022	-230	-1953	In isolation
community34	community5	160	714	6297	22116	0.00624354	0.0177081	-554	-6137	In isolation
community39	community5	50	266	6407	22564	0.00630159	0.0178066	-216	-6357	In isolation
community11	community50	5	1357	304	27621	0.00630795	0.0178066	-1352	-299	In isolation
community42	community72	3	247	41	28996	0.00628856	0.0178066	-244	-38	In isolation
community26	community30	5	881	475	27926	0.00665579	0.0187591	-876	-470	In isolation
community43	community8	17	285	796	28189	0.00679904	0.0191329	-268	-779	In isolation
community26	community50	2	884	307	28094	0.00711158	0.0199812	-882	-305	In isolation
community31	community39	2	865	314	28106	0.00712385	0.0199845	-863	-312	In isolation
community43	community7	9	293	1956	27029	0.0073132	0.0204838	-284	-1947	In isolation
community28	community32	2	390	718	28177	0.00747186	0.0208957	-388	-716	In isolation
community34	community44	8	866	87	28326	0.00756435	0.0211215	-858	-79	In isolation
community1	community54	36	4033	351	24867	0.00757867	0.0211288	-3997	-315	In isolation
community6	community7	22	529	1943	26793	0.0075972	0.0211477	-507	-1921	In isolation
community12	community2	969	1826	9863	16629	0.00787121	0.0218766	-857	-8894	In isolation
community34	community42	1	873	249	28164	0.00799572	0.0221884	-872	-248	In isolation
community18	community56	3	974	325	27985	0.00805076	0.0223068	-971	-322	In isolation
community32	community43	1	719	301	28266	0.00808165	0.022358	-718	-300	In isolation
community1	community59	4	4065	85	25133	0.00813475	0.022436	-4061	-81	In isolation
community22	community67	1	731	299	28256	0.00813474	0.022436	-730	-298	In isolation
community20	community62	1	462	468	28356	0.00817455	0.0225113	-461	-467	In isolation
community43	community6	13	289	538	28447	0.00819223	0.0225255	-276	-525	In isolation
community22	community36	1	731	302	28253	0.00824472	0.022582	-730	-301	In isolation
community32	community38	1	719	307	28260	0.00825038	0.022582	-718	-306	In isolation
community20	community58	1	462	473	28351	0.00823468	0.022582	-461	-472	In isolation
community24	community39	1	709	315	28262	0.00844991	0.023093	-708	-314	In isolation
community5	community50	88	6369	221	22609	0.00858841	0.023436	-6281	-133	In isolation
community16	community4	5	397	1015	27870	0.00879025	0.0239504	-392	-1010	In isolation
community24	community9	33	677	820	27757	0.0088802	0.024159	-644	-787	In isolation
community18	community64	6	971	464	27846	0.00891742	0.0242236	-965	-458	In isolation
community53	community74	2	149	26	29110	0.00914224	0.0247969	-147	-24	In isolation
community11	community27	2	1360	192	27733	0.00951342	0.0257649	-1358	-190	In isolation
community25	community32	10	850	710	27717	0.00970416	0.026242	-840	-700	In isolation
community3	community49	4	2490	138	26655	0.00983831	0.0265649	-2486	-134	In isolation
community37	community38	8	272	300	28707	0.00995122	0.0268296	-264	-292	In isolation
community34	community43	2	872	300	28113	0.009995	0.0269073	-870	-298	In isolation
community34	community36	2	872	301	28112	0.0100164	0.0269246	-870	-299	In isolation
community26	community43	2	884	300	28101	0.0101224	0.027169	-882	-298	In isolation
community31	community50	2	865	307	28113	0.0101579	0.0272238	-863	-305	In isolation
community13	community23	2	339	783	28163	0.0102116	0.027327	-337	-781	In isolation
community34	community38	2	872	306	28107	0.0102365	0.0273531	-870	-304	In isolation
community26	community48	2	884	303	28098	0.0103061	0.0274983	-882	-301	In isolation
community36	community64	11	292	459	28525	0.0103265	0.0275118	-281	-448	In isolation
community5	community72	3	6454	41	22789	0.010519	0.0279832	-6451	-38	In isolation
community5	community61	84	6373	212	22618	0.0109919	0.0291982	-6289	-128	In isolation
community36	community4	3	300	1017	27967	0.011048	0.0293041	-297	-1014	In isolation
community17	community7	16	413	1949	26909	0.0110896	0.0293711	-397	-1933	In isolation
community31	community57	3	864	355	28065	0.0112225	0.0296794	-861	-352	In isolation
community63	community9	7	77	846	28357	0.0113112	0.0298701	-70	-839	In isolation
community14	community6	3	559	548	28177	0.0113612	0.0299582	-556	-545	In isolation
community25	community26	14	846	872	27555	0.0113802	0.0299645	-832	-858	In isolation
community29	community38	3	1026	305	27953	0.0114706	0.0301586	-1023	-302	In isolation
community25	community46	1	859	241	28186	0.0115278	0.0302648	-858	-240	In isolation
community5	community63	9	6448	75	22755	0.0115744	0.0303428	-6439	-66	In isolation
community16	community34	4	398	870	28015	0.0117423	0.0307381	-394	-866	In isolation
community24	community61	1	709	295	28282	0.0118153	0.0308845	-708	-294	In isolation
community25	community62	5	855	464	27963	0.0121166	0.0315885	-850	-459	In isolation
community32	community61	1	719	295	28272	0.0121197	0.0315885	-718	-294	In isolation
community24	community55	1	709	301	28276	0.0123057	0.0319805	-708	-300	In isolation
community10	community62	1	454	468	28364	0.0122967	0.0319805	-453	-467	In isolation
community10	community64	1	454	469	28363	0.0123577	0.0320696	-453	-468	In isolation
community6	community68	3	548	23	28713	0.0124845	0.0323519	-545	-20	In isolation
community38	community73	3	305	43	28936	0.0125265	0.0324142	-302	-40	In isolation
community22	community3	44	688	2450	26105	0.0129141	0.0333693	-644	-2406	In isolation
community25	community61	2	858	294	28133	0.0140969	0.0363731	-856	-292	In isolation
community4	community45	20	1000	307	27960	0.0143288	0.0369188	-980	-287	In isolation
community25	community55	2	858	300	28127	0.0145867	0.0375294	-856	-298	In isolation
community14	community40	11	551	1125	27600	0.0146512	0.0376417	-540	-1114	In isolation
community1	community6	57	4012	494	24724	0.0151241	0.0387462	-3955	-437	In isolation
community17	community48	10	419	295	28563	0.0151032	0.0387462	-409	-285	In isolation
community15	community65	1	1695	115	27476	0.015168	0.0388034	-1694	-114	In isolation
community21	community61	3	1009	293	27982	0.0152807	0.0390362	-1006	-290	In isolation
community15	community70	1	1695	116	27475	0.0153189	0.0390783	-1694	-115	In isolation
community19	community34	3	340	871	28073	0.0154595	0.0393814	-337	-868	In isolation
community18	community50	3	974	306	28004	0.0154891	0.0394008	-971	-303	In isolation
community1	community48	28	4041	277	24941	0.0155557	0.0395146	-4013	-249	In isolation
community21	community67	3	1009	297	27978	0.0156058	0.039586	-1006	-294	In isolation
community36	community40	4	299	1132	27852	0.0156844	0.0397294	-295	-1128	In isolation
community37	community7	9	271	1956	27051	0.015766	0.0398241	-262	-1947	In isolation
community19	community40	5	338	1131	27813	0.0157646	0.0398241	-333	-1126	In isolation
community18	community35	5	972	394	27916	0.015969	0.0401679	-967	-389	In isolation
community26	community54	4	882	383	28018	0.0159297	0.0401679	-878	-379	In isolation
community25	community35	4	856	395	28032	0.0159668	0.0401679	-852	-391	In isolation
community33	community40	1	174	1135	27977	0.0163016	0.0409471	-173	-1134	In isolation
community16	community31	4	398	863	28022	0.0163442	0.0409972	-394	-859	In isolation
community24	community4	37	673	983	27594	0.016495	0.0413177	-636	-946	In isolation
community3	community78	3	2491	4	26789	0.0166166	0.0413922	-2488	-1	In isolation
community27	community29	1	193	1028	28065	0.0165764	0.0413922	-192	-1027	In isolation
community23	community42	1	784	249	28253	0.0165729	0.0413922	-783	-248	In isolation
community51	community78	1	69	6	29211	0.0166132	0.0413922	-68	-5	In isolation
community30	community40	9	471	1127	27680	0.016907	0.0420203	-462	-1118	In isolation
community24	community37	1	709	279	28298	0.0169155	0.0420203	-708	-278	In isolation
community27	community35	7	187	392	28701	0.0174466	0.0432801	-180	-385	In isolation
community32	community47	1	719	281	28286	0.0175996	0.0435995	-718	-280	In isolation
community15	community55	8	1688	294	27297	0.0176356	0.0436287	-1680	-286	In isolation
community26	community9	38	848	815	27586	0.0189827	0.0468968	-810	-777	In isolation
community11	community19	7	1355	336	27589	0.0191698	0.0472942	-1348	-329	In isolation
community12	community66	1	2794	64	26428	0.0192202	0.0473537	-2793	-63	In isolation
community25	community37	2	858	278	28149	0.0195328	0.0479925	-856	-276	In isolation
community47	community9	2	280	851	28154	0.019531	0.0479925	-278	-849	In isolation
community67	community8	2	298	811	28176	0.0198348	0.0486683	-296	-809	In isolation
community23	community39	2	783	314	28188	0.0204588	0.0501309	-781	-312	Not significant
community40	community56	5	1131	323	27828	0.0207718	0.0508289	-1126	-318	Not significant
community34	community45	3	871	324	28089	0.0210229	0.0513735	-868	-321	Not significant
community28	community80	2	390	15	28880	0.0212825	0.0519374	-388	-13	Not significant
community26	community56	3	883	325	28076	0.0214192	0.0522003	-880	-322	Not significant
community10	community32	4	451	716	28116	0.0215565	0.0524639	-447	-712	Not significant
community19	community5	58	285	6399	22545	0.0216524	0.052626	-227	-6341	Not significant
community53	community72	2	149	42	29094	0.0216852	0.0526348	-147	-40	Not significant
community19	community9	3	340	850	28094	0.0217418	0.0527011	-337	-847	Not significant
community24	community58	4	706	470	28107	0.0221969	0.053732	-702	-466	Not significant
community44	community78	1	94	6	29186	0.0224888	0.0543656	-93	-5	Not significant
community22	community42	1	731	249	28306	0.0236204	0.0570245	-730	-248	Not significant
community54	community62	1	386	468	28432	0.0238563	0.057517	-385	-467	Not significant
community14	community56	1	561	327	28398	0.023953	0.0576552	-560	-326	Not significant
community28	community62	1	391	468	28427	0.0239776	0.0576552	-390	-467	Not significant
community28	community64	1	391	469	28426	0.0240117	0.0576601	-390	-468	Not significant
community65	community7	2	114	1963	27208	0.0245963	0.0589067	-112	-1961	Not significant
community23	community46	1	784	241	28261	0.0245931	0.0589067	-783	-240	Not significant
community5	community64	124	6333	346	22484	0.0247733	0.0592519	-6209	-222	Not significant
community12	community65	4	2791	112	26380	0.0248371	0.0593258	-2787	-108	Not significant
community12	community35	25	2770	374	26118	0.0252318	0.0601887	-2745	-349	Not significant
community30	community35	1	479	398	28409	0.0253859	0.0604761	-478	-397	Not significant
community37	community68	2	278	24	28983	0.0254526	0.060555	-276	-22	Not significant
community11	community67	6	1356	294	27631	0.0262242	0.0623084	-1350	-288	Not significant
community40	community57	6	1130	352	27799	0.0265371	0.0629689	-1124	-346	Not significant
community10	community17	13	442	416	28416	0.0266241	0.0630921	-429	-403	Not significant
community19	community43	8	335	294	28650	0.0266749	0.0631294	-327	-286	Not significant
community15	community50	9	1687	300	27291	0.0267941	0.0632067	-1678	-291	Not significant
community35	community4	6	393	1014	27874	0.0267588	0.0632067	-387	-1008	Not significant
community10	community26	6	449	880	27952	0.0268129	0.0632067	-443	-874	Not significant
community37	community8	2	278	811	28196	0.0271898	0.0640116	-276	-809	Not significant
community22	community50	2	730	307	28248	0.0272946	0.0641001	-728	-305	Not significant
community22	community38	2	730	306	28249	0.0272986	0.0641001	-728	-304	Not significant
community16	community29	6	396	1023	27862	0.0274648	0.0644064	-390	-1017	Not significant
community39	community40	5	311	1131	27840	0.0275624	0.0645512	-306	-1126	Not significant
community23	community61	2	783	294	28208	0.0276754	0.0647318	-781	-292	Not significant
community24	community56	2	708	326	28251	0.0278753	0.0651146	-706	-324	Not significant
community3	community65	17	2477	99	26694	0.0279972	0.0652303	-2460	-82	Not significant
community34	community8	14	860	799	27614	0.0279771	0.0652303	-846	-785	Not significant
community26	community8	14	872	799	27602	0.0283407	0.0659452	-858	-785	Not significant
community54	community8	4	383	809	28091	0.0288122	0.0669558	-379	-805	Not significant
community34	community39	3	871	313	28100	0.0288908	0.067052	-868	-310	Not significant
community21	community4	23	989	997	27278	0.0291355	0.0675329	-966	-974	Not significant
community35	community8	4	395	809	28079	0.0296495	0.0686359	-391	-805	Not significant
community3	community8	52	2442	761	26032	0.0299636	0.0692739	-2390	-709	Not significant
community41	community76	2	247	30	29008	0.0302042	0.0697408	-245	-28	Not significant
community28	community69	3	389	48	28847	0.0308815	0.0712132	-386	-45	Not significant
community32	community40	17	703	1119	27448	0.0310804	0.0715804	-686	-1102	Not significant
community4	community46	15	1005	227	28040	0.0318126	0.0731731	-990	-212	Not significant
community44	community81	1	94	9	29183	0.031973	0.0734482	-93	-8	Not significant
community27	community34	1	193	873	28220	0.0332521	0.0762892	-192	-872	Not significant
community4	community6	10	1010	541	27726	0.0334574	0.0766626	-1000	-531	Not significant
community42	community49	4	246	138	28899	0.033775	0.077292	-242	-134	Not significant
community38	community6	1	307	550	28429	0.0338947	0.0774675	-306	-549	Not significant
community11	community77	1	1361	131	27794	0.0340187	0.0775539	-1360	-130	Not significant
community14	community48	1	561	304	28421	0.0339783	0.0775539	-560	-303	Not significant
community24	community42	1	709	249	28328	0.0349216	0.0795119	-708	-248	Not significant
community20	community9	6	457	847	27977	0.0353523	0.0803908	-451	-841	Not significant
community14	community15	21	541	1675	27050	0.035414	0.0804295	-520	-1654	Not significant
community32	community42	1	719	249	28318	0.0357777	0.0811532	-718	-248	Not significant
community20	community54	1	462	386	28438	0.0358464	0.0812066	-461	-385	Not significant
community34	community35	5	869	394	28019	0.0370999	0.0839408	-864	-389	Not significant
community79	community8	6	83	807	28391	0.0375478	0.0848478	-77	-801	Not significant
community34	community41	2	872	247	28166	0.0377226	0.0851358	-870	-245	Not significant
community29	community61	4	1025	292	27966	0.0381314	0.0859506	-1021	-288	Not significant
community24	community38	2	708	306	28271	0.0382149	0.0860314	-706	-304	Not significant
community32	community48	2	718	303	28264	0.0383412	0.0862079	-716	-301	Not significant
community52	community56	4	109	324	28850	0.0384874	0.0864286	-105	-320	Not significant
community21	community48	4	1008	301	27974	0.0385669	0.0864993	-1004	-297	Not significant
community14	community28	2	560	390	28335	0.0387145	0.0867223	-558	-388	Not significant
community43	community9	15	287	838	28147	0.0388672	0.0867541	-272	-823	Not significant
community29	community55	4	1025	298	27960	0.0388731	0.0867541	-1021	-294	Not significant
community62	community64	2	467	468	28350	0.0387908	0.0867541	-465	-466	Not significant
community26	community61	3	883	293	28108	0.0390028	0.0869358	-880	-290	Not significant
community25	community40	22	838	1114	27313	0.03915	0.0871559	-816	-1092	Not significant
community34	community55	3	871	299	28114	0.0392418	0.0872525	-868	-296	Not significant
community58	community6	3	471	548	28265	0.0394429	0.0875915	-468	-545	Not significant
community34	community48	3	871	302	28111	0.0397179	0.0879852	-868	-299	Not significant
community14	community62	3	559	466	28259	0.0396897	0.0879852	-556	-463	Not significant
community26	community36	3	883	300	28101	0.0401445	0.088821	-880	-297	Not significant
community15	community42	7	1689	243	27348	0.0404287	0.0893399	-1682	-236	Not significant
community38	community55	7	301	295	28684	0.0414286	0.0914373	-294	-288	Not significant
community42	community75	1	249	4	29033	0.0419614	0.0925	-248	-3	Not significant
community15	community44	1	1695	94	27497	0.0448932	0.0988419	-1694	-93	Not significant
community63	community7	1	83	1964	27239	0.0449973	0.0989502	-82	-1963	Not significant
community26	community33	10	876	165	28236	0.045305	0.0994703	-866	-155	Not significant
community17	community67	9	420	291	28567	0.0453443	0.0994703	-411	-282	Not significant
community13	community71	1	340	3	28943	0.0457688	0.100279	-339	-2	Not significant
community11	community70	1	1361	116	27809	0.0458296	0.100291	-1360	-115	Not significant
community64	community8	6	464	807	28010	0.0460918	0.100742	-458	-801	Not significant
community10	community9	6	449	847	27985	0.047004	0.102487	-443	-841	Not significant
community3	community63	2	2492	82	26711	0.0469981	0.102487	-2490	-80	Not significant
community10	community19	10	445	333	28499	0.0475722	0.1036	-435	-323	Not significant
community14	community37	1	561	279	28446	0.0481513	0.104735	-560	-278	Not significant
community29	community56	5	1024	323	27935	0.0485451	0.105464	-1019	-318	Not significant
community34	community4	20	854	1000	27413	0.0490099	0.106263	-834	-980	Not significant
community6	community61	1	550	295	28441	0.0490307	0.106263	-549	-294	Not significant
community28	community31	5	387	862	28033	0.0492375	0.106583	-382	-857	Not significant
community13	community30	1	340	479	28467	0.049313	0.106618	-339	-478	Not significant
community55	community6	1	301	550	28435	0.0502429	0.108498	-300	-549	Not significant
community53	community81	1	150	9	29127	0.0503863	0.108678	-149	-8	Not significant
community2	community32	241	10591	479	17976	0.0506278	0.109068	-10350	-238	Not significant
community29	community47	4	1025	278	27980	0.0507816	0.109268	-1021	-274	Not significant
community57	community62	1	357	468	28461	0.0510784	0.109776	-356	-467	Not significant
community57	community64	1	357	469	28460	0.0512651	0.110046	-356	-468	Not significant
community11	community6	16	1346	535	27390	0.0515211	0.110332	-1330	-519	Not significant
community18	community36	4	973	299	28011	0.051466	0.110332	-969	-295	Not significant
community10	community60	3	452	51	28781	0.0516321	0.110439	-449	-48	Not significant
community28	community42	7	385	243	28652	0.0520794	0.111263	-378	-236	Not significant
community36	community8	3	300	810	28174	0.0527473	0.112291	-297	-807	Not significant
community22	community47	2	730	280	28275	0.0526947	0.112291	-728	-278	Not significant
community17	community64	2	427	468	28390	0.0527322	0.112291	-425	-466	Not significant
community34	community46	2	872	240	28173	0.0537326	0.114253	-870	-238	Not significant
community43	community45	7	295	320	28665	0.0538852	0.114443	-288	-313	Not significant
community24	community57	3	707	355	28222	0.0540923	0.114747	-704	-352	Not significant
community16	community21	7	395	1005	27880	0.0543412	0.11514	-388	-998	Not significant
community14	community50	11	551	298	28427	0.0546965	0.115381	-540	-287	Not significant
community20	community26	7	456	879	27945	0.054694	0.115381	-449	-872	Not significant
community39	community8	3	313	810	28161	0.0547114	0.115381	-310	-807	Not significant
community20	community6	3	460	548	28276	0.0545921	0.115381	-457	-545	Not significant
community54	community6	2	385	549	28351	0.0552089	0.116294	-383	-547	Not significant
community20	community61	9	454	287	28537	0.0556154	0.116877	-445	-278	Not significant
community44	community70	2	93	115	29077	0.0555597	0.116877	-91	-113	Not significant
community2	community26	355	10477	531	17924	0.0563513	0.118285	-10122	-176	Not significant
community4	community62	24	996	445	27822	0.056465	0.118386	-972	-421	Not significant
community5	community70	17	6440	100	22730	0.0566671	0.118534	-6423	-83	Not significant
community12	community70	5	2790	112	26380	0.0566179	0.118534	-2785	-107	Not significant
community2	community79	24	10808	65	18390	0.0609022	0.127097	-10784	-41	Not significant
community10	community44	4	451	91	28741	0.0608879	0.127097	-447	-87	Not significant
community58	community64	13	461	457	28356	0.0613313	0.127845	-448	-444	Not significant
community3	community52	4	2490	109	26684	0.0614637	0.127972	-2486	-105	Not significant
community49	community63	2	140	82	29063	0.06289	0.130791	-138	-80	Not significant
community15	community28	14	1682	378	27213	0.0631929	0.131269	-1668	-364	Not significant
community17	community4	8	421	1012	27846	0.0633763	0.131347	-413	-1004	Not significant
community29	community52	8	1021	105	28153	0.0633465	0.131347	-1013	-97	Not significant
community15	community51	8	1688	62	27529	0.0640717	0.132636	-1680	-54	Not significant
community21	community56	5	1007	323	27952	0.06524	0.134899	-1002	-318	Not significant
community18	community47	15	962	267	28043	0.0665837	0.13752	-947	-252	Not significant
community40	community42	4	1132	246	27905	0.0678194	0.139912	-1128	-242	Not significant
community15	community52	2	1694	111	27480	0.0680532	0.140233	-1692	-109	Not significant
community30	community43	1	479	301	28506	0.0684937	0.140819	-478	-300	Not significant
community30	community55	1	479	301	28506	0.0684937	0.140819	-478	-300	Not significant
community39	community64	1	315	469	28502	0.0688464	0.141221	-314	-468	Not significant
community39	community62	1	315	468	28503	0.068785	0.141221	-314	-467	Not significant
community22	community54	4	728	383	28172	0.0689618	0.14125	-724	-379	Not significant
community35	community52	4	395	109	28779	0.0690174	0.14125	-391	-105	Not significant
community4	community53	1	1019	150	28117	0.0691628	0.141387	-1018	-149	Not significant
community30	community39	1	479	315	28492	0.0698118	0.142552	-478	-314	Not significant
community29	community53	1	1028	150	28108	0.0699455	0.142664	-1027	-149	Not significant
community62	community9	7	462	846	27972	0.0704055	0.143439	-455	-839	Not significant
community45	community62	1	326	468	28492	0.0706098	0.143693	-325	-467	Not significant
community56	community62	1	327	468	28491	0.070859	0.144037	-326	-467	Not significant
community25	community64	7	853	463	27964	0.0711361	0.144438	-846	-456	Not significant
community35	community54	1	398	386	28502	0.0712458	0.144497	-397	-385	Not significant
community14	community32	7	555	713	28012	0.0714829	0.144815	-548	-706	Not significant
community21	community27	2	1010	192	28083	0.0721004	0.145902	-1008	-190	Not significant
community18	community41	3	974	246	28064	0.0724797	0.146505	-971	-243	Not significant
community31	community37	3	864	277	28143	0.0726717	0.146728	-861	-274	Not significant
community34	community37	3	871	277	28136	0.0734687	0.148171	-868	-274	Not significant
community57	community6	2	356	549	28380	0.0739257	0.148926	-354	-547	Not significant
community52	community70	2	111	115	29059	0.0752254	0.151375	-109	-113	Not significant
community1	community80	5	4064	12	25206	0.0757258	0.152212	-4059	-7	Not significant
community68	community79	1	25	88	29173	0.0761128	0.15282	-24	-87	Not significant
community60	community72	1	53	43	29190	0.0780486	0.156532	-52	-42	Not significant
community21	community8	19	993	794	27481	0.0793326	0.15893	-974	-775	Not significant
community12	community44	4	2791	91	26401	0.0800783	0.160246	-2787	-87	Not significant
community1	community72	2	4067	42	25176	0.080208	0.160327	-4065	-40	Not significant
community18	community25	38	939	822	27488	0.0817844	0.163297	-901	-784	Not significant
community42	community81	1	249	9	29028	0.0821688	0.163883	-248	-8	Not significant
community21	community50	5	1007	304	27971	0.0832154	0.165787	-1002	-299	Not significant
community2	community33	76	10756	99	18356	0.0839017	0.166969	-10680	-23	Not significant
community40	community52	8	1128	105	28046	0.0842433	0.167464	-1120	-97	Not significant
community26	community57	5	881	353	28048	0.0847189	0.168223	-876	-348	Not significant
community22	community33	8	724	167	28388	0.0851866	0.168966	-716	-159	Not significant
community13	community59	3	338	86	28860	0.0857286	0.169854	-335	-83	Not significant
community3	community79	3	2491	86	26707	0.0867416	0.171672	-2488	-83	Not significant
community11	community37	7	1355	273	27652	0.087426	0.172837	-1348	-266	Not significant
community26	community27	10	876	184	28217	0.0893918	0.176529	-866	-174	Not significant
community56	community8	4	324	809	28150	0.0900902	0.177714	-320	-805	Not significant
community14	community58	4	558	470	28255	0.0906633	0.178648	-554	-466	Not significant
community1	community61	31	4038	265	24953	0.0911841	0.179478	-4007	-234	Not significant
community59	community76	1	88	31	29167	0.0928471	0.182552	-87	-30	Not significant
community13	community8	15	326	798	28148	0.0932694	0.183182	-311	-783	Not significant
community40	community70	1	1135	116	28035	0.094062	0.184538	-1134	-115	Not significant
community37	community52	3	277	110	28897	0.0944228	0.185044	-274	-107	Not significant
community11	community20	14	1348	449	27476	0.0955949	0.18707	-1334	-435	Not significant
community52	community68	1	112	25	29149	0.0956643	0.18707	-111	-24	Not significant
community19	community48	7	336	298	28646	0.0957974	0.187127	-329	-291	Not significant
community18	community49	1	976	141	28169	0.0961479	0.187608	-975	-140	Not significant
community58	community62	3	471	466	28347	0.0963547	0.187808	-468	-463	Not significant
community23	community66	4	781	61	28441	0.0967313	0.188338	-777	-57	Not significant
community47	community58	1	281	473	28532	0.0969455	0.188348	-280	-472	Not significant
community33	community80	1	174	16	29096	0.0968924	0.188348	-173	-15	Not significant
community19	community28	1	342	391	28553	0.0971254	0.188494	-341	-390	Not significant
community17	community39	1	428	315	28543	0.09724	0.188514	-427	-314	Not significant
community10	community67	1	454	299	28533	0.0974092	0.188639	-453	-298	Not significant
community40	community67	6	1130	294	27857	0.0975609	0.188729	-1124	-288	Not significant
community29	community33	2	1027	173	28085	0.0976834	0.188764	-1025	-171	Not significant
community10	community36	1	454	302	28530	0.0978552	0.188893	-453	-301	Not significant
community10	community48	1	454	304	28528	0.0982391	0.189431	-453	-303	Not significant
community16	community9	6	396	847	28038	0.0988849	0.189736	-390	-841	Not significant
community32	community41	2	718	247	28320	0.0989498	0.189736	-716	-245	Not significant
community33	community8	1	174	812	28300	0.0990845	0.189736	-173	-811	Not significant
community58	community61	1	473	295	28518	0.0990002	0.189736	-472	-294	Not significant
community20	community55	1	462	301	28523	0.0987524	0.189736	-461	-300	Not significant
community28	community57	1	391	357	28538	0.0991345	0.189736	-390	-356	Not significant
community44	community76	1	94	31	29161	0.0987965	0.189736	-93	-30	Not significant
community21	community49	1	1011	141	28134	0.0992976	0.189846	-1010	-140	Not significant
community56	community6	2	326	549	28410	0.0997303	0.190471	-324	-547	Not significant
community55	community64	1	301	469	28516	0.100077	0.190728	-300	-468	Not significant
community51	community72	1	69	43	29174	0.100008	0.190728	-68	-42	Not significant
community58	community67	1	473	299	28514	0.100258	0.190872	-472	-298	Not significant
community11	community38	8	1354	300	27625	0.100641	0.191251	-1346	-292	Not significant
community54	community58	2	385	472	28428	0.100669	0.191251	-383	-470	Not significant
community25	community31	17	843	850	27577	0.100908	0.191503	-826	-833	Not significant
community20	community35	2	461	397	28427	0.10123	0.191911	-459	-395	Not significant
community47	community65	3	279	113	28892	0.101782	0.19235	-276	-110	Not significant
community30	community54	2	478	385	28422	0.101722	0.19235	-476	-383	Not significant
community30	community67	1	479	299	28508	0.101708	0.19235	-478	-298	Not significant
community26	community6	10	876	541	27860	0.101945	0.192457	-866	-531	Not significant
community48	community58	1	304	473	28509	0.102237	0.192805	-303	-472	Not significant
community18	community27	11	966	183	28127	0.102437	0.192981	-955	-172	Not significant
community28	community30	2	390	478	28417	0.103175	0.194167	-388	-476	Not significant
community2	community81	1	10831	9	18446	0.103303	0.194206	-10830	-8	Not significant
community16	community64	2	400	468	28417	0.103733	0.194811	-398	-466	Not significant
community11	community60	5	1357	49	27876	0.105321	0.197587	-1352	-44	Not significant
community21	community9	38	974	815	27460	0.1057	0.197885	-936	-777	Not significant
community3	community53	7	2487	144	26649	0.105679	0.197885	-2480	-137	Not significant
community25	community47	13	847	269	28158	0.106822	0.199571	-834	-256	Not significant
community1	community69	3	4066	48	25170	0.106736	0.199571	-4063	-45	Not significant
community13	community31	5	336	862	28084	0.108245	0.202019	-331	-857	Not significant
community1	community35	44	4025	355	24863	0.108398	0.202048	-3981	-311	Not significant
community4	community61	5	1015	291	27976	0.108485	0.202048	-1010	-286	Not significant
community11	community52	9	1353	104	27821	0.110454	0.205504	-1344	-95	Not significant
community26	community40	25	861	1111	27290	0.110941	0.206198	-836	-1086	Not significant
community15	community76	4	1692	28	27563	0.111474	0.206974	-1688	-24	Not significant
community2	community54	128	10704	259	18196	0.111996	0.207729	-10576	-131	Not significant
community21	community60	4	1008	50	28225	0.11597	0.214878	-1004	-46	Not significant
community28	community59	3	389	86	28809	0.117167	0.216874	-386	-83	Not significant
community27	community47	4	190	278	28815	0.118318	0.218779	-186	-274	Not significant
community63	community72	1	83	43	29160	0.118803	0.21945	-82	-42	Not significant
community29	community60	4	1025	50	28208	0.121245	0.223731	-1021	-46	Not significant
community16	community72	2	400	42	28843	0.122188	0.225241	-398	-40	Not significant
community18	community30	22	955	458	27852	0.12379	0.227729	-933	-436	Not significant
community25	community66	4	856	61	28366	0.123749	0.227729	-852	-57	Not significant
community12	community73	1	2794	45	26447	0.125427	0.230504	-2793	-44	Not significant
community28	community81	1	391	9	28886	0.126085	0.231478	-390	-8	Not significant
community3	community69	1	2493	50	26743	0.126425	0.231865	-2492	-49	Not significant
community4	community56	6	1014	322	27945	0.126936	0.232565	-1008	-316	Not significant
community34	community6	10	864	541	27872	0.127227	0.232862	-854	-531	Not significant
community24	community64	6	704	464	28113	0.127764	0.233607	-698	-458	Not significant
community58	community9	8	466	845	27968	0.128246	0.233763	-458	-837	Not significant
community25	community28	6	854	386	28041	0.128628	0.233763	-848	-380	Not significant
community25	community42	3	857	247	28180	0.128626	0.233763	-854	-244	Not significant
community25	community41	3	857	246	28181	0.128307	0.233763	-854	-243	Not significant
community24	community67	3	707	297	28280	0.128609	0.233763	-704	-294	Not significant
community35	community81	1	398	9	28879	0.1282	0.233763	-397	-8	Not significant
community25	community58	8	852	466	27961	0.128974	0.234155	-844	-458	Not significant
community32	community67	3	717	297	28270	0.12966	0.235163	-714	-294	Not significant
community35	community73	2	397	44	28844	0.129797	0.235175	-395	-42	Not significant
community14	community54	3	559	384	28341	0.130893	0.236923	-556	-381	Not significant
community20	community64	3	460	467	28357	0.131064	0.236994	-457	-464	Not significant
community2	community80	3	10829	14	18441	0.131551	0.237635	-10826	-11	Not significant
community24	community8	13	697	800	27777	0.132433	0.23875	-684	-787	Not significant
community35	community6	3	396	548	28340	0.132362	0.23875	-393	-545	Not significant
community32	community8	13	707	800	27767	0.133579	0.240577	-694	-787	Not significant
community18	community33	2	975	173	28137	0.135102	0.243075	-973	-171	Not significant
community42	community80	1	249	16	29021	0.135651	0.24382	-248	-15	Not significant
community26	community49	1	885	141	28260	0.136001	0.244205	-884	-140	Not significant
community14	community67	2	560	298	28427	0.136156	0.24424	-558	-296	Not significant
community3	community30	50	2444	430	26363	0.137321	0.244733	-2394	-380	Not significant
community32	community33	1	719	174	28393	0.137001	0.244733	-718	-173	Not significant
community17	community47	1	428	281	28577	0.136958	0.244733	-427	-280	Not significant
community28	community39	1	391	315	28580	0.137382	0.244733	-390	-314	Not significant
community39	community54	1	315	386	28585	0.137081	0.244733	-314	-385	Not significant
community28	community50	1	391	308	28587	0.137025	0.244733	-390	-307	Not significant
community19	community57	1	342	357	28587	0.137171	0.244733	-341	-356	Not significant
community5	community54	73	6384	314	22516	0.138431	0.246114	-6311	-241	Not significant
community32	community46	2	718	240	28327	0.138379	0.246114	-716	-238	Not significant
community39	community6	2	314	549	28422	0.138926	0.246752	-312	-547	Not significant
community1	community37	30	4039	250	24968	0.139422	0.247389	-4009	-220	Not significant
community4	community47	5	1015	277	27990	0.139688	0.247617	-1010	-272	Not significant
community28	community56	1	391	327	28568	0.139897	0.247742	-390	-326	Not significant
community1	community17	49	4020	380	24838	0.140225	0.24808	-3971	-331	Not significant
community24	community41	2	708	247	28330	0.140522	0.248361	-706	-245	Not significant
community32	community35	5	715	394	28173	0.14088	0.24875	-710	-389	Not significant
community20	community47	1	462	281	28543	0.141527	0.249648	-461	-280	Not significant
community40	community54	9	1127	378	27773	0.14241	0.25096	-1118	-369	Not significant
community16	community45	1	401	326	28559	0.142565	0.250987	-400	-325	Not significant
community2	community76	16	10816	16	18439	0.14356	0.25241	-10800	0	Not significant
community47	community64	1	281	469	28536	0.143661	0.25241	-280	-468	Not significant
community60	community63	1	53	83	29150	0.143794	0.25241	-52	-82	Not significant
community12	community59	4	2791	85	26407	0.144416	0.253114	-2787	-81	Not significant
community5	community80	1	6456	16	22814	0.144476	0.253114	-6455	-15	Not significant
community23	community62	7	778	462	28040	0.146257	0.255986	-771	-455	Not significant
community10	community72	2	453	42	28790	0.149163	0.260817	-451	-40	Not significant
community14	community33	6	556	169	28556	0.154967	0.270703	-550	-163	Not significant
community4	community9	22	998	831	27436	0.155248	0.270931	-976	-809	Not significant
community19	community32	4	339	716	28228	0.156788	0.273354	-335	-712	Not significant
community58	community8	8	466	805	28008	0.159673	0.278114	-458	-797	Not significant
community10	community73	2	453	44	28788	0.160036	0.278478	-451	-42	Not significant
community3	community37	17	2477	263	26530	0.161297	0.280401	-2460	-246	Not significant
community16	community42	6	396	244	28641	0.16232	0.281754	-390	-238	Not significant
community22	community78	1	731	6	28549	0.162388	0.281754	-730	-5	Not significant
community12	community60	2	2793	52	26440	0.16857	0.292198	-2791	-50	Not significant
community14	community26	11	551	875	27850	0.169299	0.29318	-540	-864	Not significant
community6	community81	1	550	9	28727	0.173008	0.299315	-549	-8	Not significant
community52	community69	1	112	50	29124	0.179077	0.309518	-111	-49	Not significant
community72	community77	1	43	131	29112	0.180375	0.311462	-42	-130	Not significant
community3	community73	1	2493	45	26748	0.180584	0.311525	-2492	-44	Not significant
community19	community29	7	336	1022	27922	0.181149	0.3122	-329	-1015	Not significant
community24	community43	11	699	291	28286	0.182367	0.313197	-688	-280	Not significant
community26	community35	7	879	392	28009	0.182075	0.313197	-872	-385	Not significant
community26	community39	5	881	311	28090	0.182379	0.313197	-876	-306	Not significant
community36	community49	3	300	139	28845	0.182423	0.313197	-297	-136	Not significant
community40	community49	2	1134	140	28011	0.184759	0.316474	-1132	-138	Not significant
community56	community58	2	326	472	28487	0.185034	0.316474	-324	-470	Not significant
community45	community58	2	325	472	28488	0.184919	0.316474	-323	-470	Not significant
community17	community57	2	427	356	28502	0.18479	0.316474	-425	-354	Not significant
community28	community35	2	390	397	28498	0.185426	0.316843	-388	-395	Not significant
community14	community47	2	560	280	28445	0.18601	0.317239	-558	-278	Not significant
community13	community20	2	339	461	28485	0.185985	0.317239	-337	-459	Not significant
community19	community64	2	341	468	28476	0.18816	0.320602	-339	-466	Not significant
community12	community63	4	2791	80	26412	0.189176	0.322028	-2787	-76	Not significant
community4	community57	17	1003	341	27926	0.189757	0.322713	-986	-324	Not significant
community44	community66	1	94	64	29128	0.190565	0.32378	-93	-63	Not significant
community25	community77	1	859	131	28296	0.191766	0.325514	-858	-130	Not significant
community4	community52	1	1019	112	28155	0.191997	0.325599	-1018	-111	Not significant
community31	community77	1	866	131	28289	0.192355	0.325899	-865	-130	Not significant
community10	community46	1	454	241	28591	0.192696	0.32617	-453	-240	Not significant
community34	community77	1	873	131	28282	0.193058	0.326476	-872	-130	Not significant
community19	community56	1	342	327	28617	0.19366	0.327187	-341	-326	Not significant
community46	community64	1	241	469	28576	0.194047	0.327535	-240	-468	Not significant
community46	community58	1	241	473	28572	0.194709	0.328256	-240	-472	Not significant
community54	community61	1	386	295	28605	0.194839	0.328256	-385	-294	Not significant
community38	community42	5	303	245	28734	0.195175	0.328271	-298	-240	Not significant
community20	community41	1	462	248	28576	0.195213	0.328271	-461	-247	Not significant
community4	community70	1	1019	116	28151	0.196595	0.330287	-1018	-115	Not significant
community42	community64	1	249	469	28568	0.19736	0.330647	-248	-468	Not significant
community36	community54	1	302	386	28598	0.197315	0.330647	-301	-385	Not significant
community45	community57	1	326	357	28603	0.197139	0.330647	-325	-356	Not significant
community25	community74	2	858	26	28401	0.198178	0.331429	-856	-24	Not significant
community48	community54	1	304	386	28596	0.198195	0.331429	-303	-385	Not significant
community42	community58	1	249	473	28564	0.198532	0.331685	-248	-472	Not significant
community15	community30	21	1675	459	27132	0.200256	0.334036	-1654	-438	Not significant
community49	community9	7	135	846	28299	0.20031	0.334036	-128	-839	Not significant
community30	community64	11	469	459	28348	0.201423	0.335142	-458	-448	Not significant
community32	community39	4	716	312	28255	0.201532	0.335142	-712	-308	Not significant
community35	community55	1	398	301	28587	0.20147	0.335142	-397	-300	Not significant
community4	community55	6	1014	296	27971	0.203731	0.338175	-1008	-290	Not significant
community44	community51	1	94	69	29123	0.203638	0.338175	-93	-68	Not significant
community23	community67	4	781	296	28206	0.203946	0.338219	-777	-292	Not significant
community11	community8	30	1332	783	27142	0.205162	0.339923	-1302	-753	Not significant
community17	community32	6	423	714	28144	0.205485	0.340145	-417	-708	Not significant
community21	community38	6	1006	302	27973	0.205699	0.340187	-1000	-296	Not significant
community35	community50	7	392	302	28586	0.206087	0.340517	-385	-295	Not significant
community14	community31	11	551	856	27869	0.206448	0.3408	-540	-845	Not significant
community37	community59	2	278	87	28920	0.209253	0.345114	-276	-85	Not significant
community21	community24	18	994	692	27583	0.210642	0.346771	-976	-674	Not significant
community35	community65	3	396	113	28775	0.210608	0.346771	-393	-110	Not significant
community41	community74	1	248	27	29011	0.212732	0.34989	-247	-26	Not significant
community35	community70	3	396	114	28774	0.214144	0.351891	-393	-111	Not significant
community5	community62	92	6365	377	22453	0.216711	0.355785	-6273	-285	Not significant
community13	community22	12	329	720	28226	0.219083	0.358836	-317	-708	Not significant
community45	community6	9	318	542	28418	0.218834	0.358836	-309	-533	Not significant
community1	community79	8	4061	81	25137	0.219167	0.358836	-4053	-73	Not significant
community4	community78	1	1019	6	28261	0.21977	0.359497	-1018	-5	Not significant
community32	community81	1	719	9	28558	0.220384	0.360174	-718	-8	Not significant
community20	community7	24	439	1941	26883	0.222511	0.363321	-415	-1917	Not significant
community14	community45	3	559	324	28401	0.225325	0.367583	-556	-321	Not significant
community10	community16	3	452	399	28433	0.225581	0.367667	-449	-396	Not significant
community59	community63	1	88	83	29115	0.225873	0.367809	-87	-82	Not significant
community35	community62	3	396	466	28422	0.226143	0.367917	-393	-463	Not significant
community35	community58	3	396	471	28417	0.226949	0.368894	-393	-468	Not significant
community16	community58	3	399	471	28414	0.227734	0.369503	-396	-468	Not significant
community65	community66	1	115	64	29107	0.227595	0.369503	-114	-63	Not significant
community50	community9	5	304	848	28130	0.230684	0.372945	-299	-843	Not significant
community22	community57	5	727	353	28202	0.23067	0.372945	-722	-348	Not significant
community6	community64	5	546	465	28271	0.230466	0.372945	-541	-460	Not significant
community6	community62	5	546	464	28272	0.2304	0.372945	-541	-459	Not significant
community38	community40	16	292	1120	27859	0.232655	0.374788	-276	-1104	Not significant
community31	community38	5	862	303	28117	0.232475	0.374788	-857	-298	Not significant
community12	community69	2	2793	49	26443	0.232251	0.374788	-2791	-47	Not significant
community61	community68	1	295	25	28966	0.232202	0.374788	-294	-24	Not significant
community10	community80	1	454	16	28816	0.233758	0.376227	-453	-15	Not significant
community1	community44	9	4060	86	25132	0.23737	0.3817	-4051	-77	Not significant
community28	community51	2	390	68	28827	0.24086	0.386966	-388	-66	Not significant
community33	community73	1	174	45	29067	0.241114	0.387028	-173	-44	Not significant
community51	community65	1	69	115	29102	0.242805	0.389397	-68	-114	Not significant
community4	community49	2	1018	140	28127	0.247687	0.396872	-1016	-138	Not significant
community15	community79	2	1694	87	27504	0.248264	0.397172	-1692	-85	Not significant
community18	community53	2	975	149	28161	0.249903	0.397172	-973	-147	Not significant
community27	community32	2	192	718	28375	0.248364	0.397172	-190	-716	Not significant
community20	community50	2	461	307	28517	0.250079	0.397172	-459	-305	Not significant
community20	community36	2	461	301	28523	0.249598	0.397172	-459	-299	Not significant
community20	community43	2	461	300	28524	0.249606	0.397172	-459	-298	Not significant
community10	community50	2	453	307	28525	0.249629	0.397172	-451	-305	Not significant
community10	community38	2	453	306	28526	0.24962	0.397172	-451	-304	Not significant
community17	community56	2	427	326	28532	0.249696	0.397172	-425	-324	Not significant
community41	community52	2	247	111	28927	0.249701	0.397172	-245	-109	Not significant
community50	community64	2	307	468	28510	0.25105	0.398362	-305	-466	Not significant
community30	community38	2	478	306	28501	0.252912	0.400964	-476	-304	Not significant
community52	community7	4	109	1961	27213	0.254121	0.402446	-105	-1957	Not significant
community10	community56	2	453	326	28506	0.254294	0.402446	-451	-324	Not significant
community13	community63	2	339	82	28864	0.256095	0.404941	-337	-80	Not significant
community28	community54	2	390	385	28510	0.257187	0.406311	-388	-383	Not significant
community15	community77	4	1692	128	27463	0.257611	0.406624	-1688	-124	Not significant
community41	community9	10	239	843	28195	0.258262	0.406937	-229	-833	Not significant
community19	community63	2	341	82	28862	0.25822	0.406937	-339	-80	Not significant
community12	community5	640	2155	5817	20675	0.259567	0.408637	-1515	-5177	Not significant
community28	community77	3	389	129	28766	0.259928	0.408848	-386	-126	Not significant
community23	community37	4	781	276	28226	0.261271	0.410601	-777	-272	Not significant
community26	community42	4	882	246	28155	0.261627	0.410803	-878	-242	Not significant
community13	community68	1	340	25	28921	0.262608	0.411983	-339	-24	Not significant
community32	community50	4	716	305	28262	0.263145	0.412467	-712	-301	Not significant
community40	community73	3	1133	43	28108	0.263926	0.412622	-1130	-40	Not significant
community38	community44	2	306	93	28886	0.26389	0.412622	-304	-91	Not significant
community19	community68	1	342	25	28919	0.263932	0.412622	-341	-24	Not significant
community10	community34	9	446	865	27967	0.264222	0.412719	-437	-856	Not significant
community64	community9	9	461	844	27973	0.265675	0.414628	-452	-835	Not significant
community29	community44	1	1028	94	28164	0.266403	0.414758	-1027	-93	Not significant
community4	community44	1	1019	94	28173	0.26637	0.414758	-1018	-93	Not significant
community21	community44	1	1011	94	28181	0.266449	0.414758	-1010	-93	Not significant
community34	community52	1	873	112	28301	0.26785	0.416219	-872	-111	Not significant
community31	community52	1	866	112	28308	0.267672	0.416219	-865	-111	Not significant
community26	community52	1	885	112	28289	0.268402	0.416717	-884	-111	Not significant
community36	community56	1	302	327	28657	0.271074	0.41906	-301	-326	Not significant
community55	community56	1	301	327	28658	0.270944	0.41906	-300	-326	Not significant
community56	community67	1	327	299	28660	0.270738	0.41906	-326	-298	Not significant
community45	community67	1	326	299	28661	0.270669	0.41906	-325	-298	Not significant
community19	community47	1	342	281	28663	0.270527	0.41906	-341	-280	Not significant
community26	community70	1	885	116	28285	0.271494	0.419348	-884	-115	Not significant
community50	community56	1	308	327	28651	0.272226	0.419401	-307	-326	Not significant
community45	community50	1	326	308	28652	0.272004	0.419401	-325	-307	Not significant
community38	community45	1	307	326	28653	0.271785	0.419401	-306	-325	Not significant
community19	community67	1	342	299	28645	0.27356	0.421096	-341	-298	Not significant
community19	community55	1	342	301	28643	0.274277	0.421838	-341	-300	Not significant
community3	community33	19	2475	156	26637	0.275184	0.422873	-2456	-137	Not significant
community13	community50	1	340	308	28638	0.276477	0.424497	-339	-307	Not significant
community29	community50	7	1022	302	27956	0.277267	0.425348	-1015	-295	Not significant
community27	community6	1	193	550	28543	0.278035	0.426162	-192	-549	Not significant
community45	community56	1	326	327	28633	0.27932	0.427769	-325	-326	Not significant
community37	community54	1	279	386	28621	0.281152	0.430208	-278	-385	Not significant
community1	community70	12	4057	105	25113	0.286026	0.437294	-4045	-93	Not significant
community23	community31	28	757	839	27663	0.286434	0.437547	-729	-811	Not significant
community49	community51	1	141	69	29076	0.288676	0.440598	-140	-68	Not significant
community19	community45	6	337	321	28623	0.289019	0.440748	-331	-315	Not significant
community2	community65	37	10795	79	18376	0.289323	0.440839	-10758	-42	Not significant
community18	community42	5	972	245	28065	0.289769	0.441144	-967	-240	Not significant
community50	community8	5	304	808	28170	0.292744	0.445298	-299	-803	Not significant
community3	community74	4	2490	24	26769	0.294593	0.447732	-2486	-20	Not significant
community35	community40	11	388	1125	27763	0.295354	0.448438	-377	-1114	Not significant
community50	community6	3	306	548	28430	0.295556	0.448438	-303	-545	Not significant
community57	community59	2	356	87	28842	0.296783	0.449199	-354	-85	Not significant
community47	community52	2	280	111	28894	0.296806	0.449199	-278	-109	Not significant
community21	community81	1	1011	9	28266	0.296517	0.449199	-1010	-8	Not significant
community36	community9	12	291	841	28143	0.298035	0.450302	-279	-829	Not significant
community14	community39	3	559	313	28412	0.297936	0.450302	-556	-310	Not significant
community19	community21	8	335	1004	27940	0.298672	0.450509	-327	-996	Not significant
community63	community8	4	80	809	28394	0.298635	0.450509	-76	-805	Not significant
community22	community58	8	724	466	28089	0.299951	0.452061	-716	-458	Not significant
community10	community53	4	451	147	28685	0.302067	0.454869	-447	-143	Not significant
community37	community70	2	278	115	28892	0.308056	0.463499	-276	-113	Not significant
community26	community55	12	874	290	28111	0.309394	0.465123	-862	-278	Not significant
community17	community37	6	423	274	28584	0.311027	0.467189	-417	-268	Not significant
community14	community25	12	550	848	27877	0.311804	0.467965	-538	-836	Not significant
community18	community23	31	946	754	27556	0.313779	0.470538	-915	-723	Not significant
community23	community58	16	769	458	28044	0.315508	0.472738	-753	-442	Not significant
community13	community57	6	335	352	28594	0.317621	0.475112	-329	-346	Not significant
community35	community63	2	397	82	28806	0.317616	0.475112	-395	-80	Not significant
community14	community19	9	553	334	28391	0.318241	0.475644	-544	-325	Not significant
community56	community9	6	322	847	28112	0.319301	0.476834	-316	-841	Not significant
community35	community38	6	393	302	28586	0.320399	0.478077	-387	-296	Not significant
community43	community46	4	298	238	28747	0.320981	0.478224	-294	-234	Not significant
community16	community74	1	401	27	28858	0.321029	0.478224	-400	-26	Not significant
community40	community9	27	1109	826	27325	0.321463	0.478474	-1082	-799	Not significant
community16	community38	6	396	302	28583	0.323666	0.480959	-390	-296	Not significant
community3	community60	2	2492	52	26741	0.323564	0.480959	-2490	-50	Not significant
community23	community29	22	763	1007	27495	0.324902	0.482028	-741	-985	Not significant
community43	community52	2	300	111	28874	0.325188	0.482028	-298	-109	Not significant
community52	community55	2	111	300	28874	0.325188	0.482028	-109	-298	Not significant
community23	community44	4	781	91	28411	0.326226	0.483168	-777	-87	Not significant
community36	community52	2	301	111	28873	0.326601	0.483326	-299	-109	Not significant
community61	community65	2	294	114	28877	0.327807	0.484713	-292	-112	Not significant
community11	community44	2	1360	93	27832	0.32934	0.48658	-1358	-91	Not significant
community51	community7	2	68	1963	27254	0.331443	0.488898	-66	-1961	Not significant
community59	community77	1	88	131	29067	0.331452	0.488898	-87	-130	Not significant
community40	community65	2	1134	114	28037	0.332204	0.489607	-1132	-112	Not significant
community11	community43	10	1352	292	27633	0.334875	0.490991	-1342	-282	Not significant
community22	community37	4	728	276	28279	0.334149	0.490991	-724	-272	Not significant
community17	community62	4	425	465	28393	0.334264	0.490991	-421	-461	Not significant
community27	community28	4	190	388	28705	0.334961	0.490991	-186	-384	Not significant
community26	community53	2	884	149	28252	0.335471	0.490991	-882	-147	Not significant
community31	community53	2	865	149	28271	0.333708	0.490991	-863	-147	Not significant
community17	community43	2	427	300	28558	0.335597	0.490991	-425	-298	Not significant
community16	community39	2	400	314	28571	0.33538	0.490991	-398	-312	Not significant
community50	community52	2	307	111	28867	0.335059	0.490991	-305	-109	Not significant
community35	community45	2	397	325	28563	0.335963	0.491128	-395	-323	Not significant
community29	community35	10	1019	389	27869	0.336729	0.491848	-1009	-379	Not significant
community17	community50	2	427	307	28551	0.337002	0.491849	-425	-305	Not significant
community38	community41	4	304	245	28734	0.338339	0.492991	-300	-241	Not significant
community30	community37	2	478	278	28529	0.338276	0.492991	-476	-276	Not significant
community10	community61	2	453	294	28538	0.338606	0.492991	-451	-292	Not significant
community3	community57	25	2469	333	26460	0.340473	0.495308	-2444	-308	Not significant
community13	community16	2	339	400	28546	0.341258	0.49605	-337	-398	Not significant
community10	community55	2	453	300	28532	0.341553	0.496079	-451	-298	Not significant
community20	community67	2	461	298	28526	0.343503	0.497707	-459	-296	Not significant
community54	community57	2	385	356	28544	0.343146	0.497707	-383	-354	Not significant
community64	community68	1	469	25	28792	0.343489	0.497707	-468	-24	Not significant
community61	community64	2	294	468	28523	0.343796	0.497731	-292	-466	Not significant
community37	community72	1	279	43	28964	0.344922	0.498959	-278	-42	Not significant
community37	community5	55	225	6402	22605	0.347244	0.501915	-170	-6347	Not significant
community22	community80	1	731	16	28539	0.349763	0.50515	-730	-15	Not significant
community28	community76	1	391	31	28864	0.350424	0.5057	-390	-30	Not significant
community62	community7	26	443	1939	26879	0.352029	0.50761	-417	-1913	Not significant
community14	community23	11	551	774	27951	0.354547	0.510831	-540	-763	Not significant
community7	community70	5	1960	112	27210	0.357142	0.514158	-1955	-107	Not significant
community44	community54	2	93	385	28807	0.358021	0.515012	-91	-383	Not significant
community17	community19	7	422	336	28522	0.358761	0.515665	-415	-329	Not significant
community52	community65	1	112	115	29059	0.361939	0.519818	-111	-114	Not significant
community24	community62	8	702	461	28116	0.365212	0.524101	-694	-453	Not significant
community35	community9	8	391	845	28043	0.366113	0.524976	-383	-837	Not significant
community20	community45	7	456	320	28504	0.36911	0.528851	-449	-313	Not significant
community42	community53	2	248	149	28888	0.369961	0.52965	-246	-147	Not significant
community23	community38	5	780	303	28199	0.370611	0.53016	-775	-298	Not significant
community17	community8	15	414	798	28060	0.371202	0.530297	-399	-783	Not significant
community3	community66	3	2491	62	26731	0.371296	0.530297	-2488	-59	Not significant
community19	community46	4	339	238	28706	0.372406	0.53104	-335	-234	Not significant
community38	community72	1	307	43	28936	0.372195	0.53104	-306	-42	Not significant
community4	community63	1	1019	83	28184	0.373755	0.532542	-1018	-82	Not significant
community4	community58	20	1000	454	27813	0.374827	0.533226	-980	-434	Not significant
community18	community59	1	976	88	28222	0.374646	0.533226	-975	-87	Not significant
community31	community72	2	865	42	28378	0.375756	0.53397	-863	-40	Not significant
community10	community63	2	453	82	28750	0.375944	0.53397	-451	-80	Not significant
community21	community59	1	1011	88	28187	0.377041	0.534332	-1010	-87	Not significant
community13	community41	1	340	248	28698	0.377928	0.534332	-339	-247	Not significant
community36	community37	1	302	279	28705	0.377978	0.534332	-301	-278	Not significant
community37	community43	1	279	301	28706	0.377962	0.534332	-278	-300	Not significant
community47	community67	1	281	299	28706	0.377965	0.534332	-280	-298	Not significant
community37	community67	1	279	299	28708	0.377977	0.534332	-278	-298	Not significant
community34	community72	2	872	42	28371	0.379544	0.535284	-870	-40	Not significant
community10	community27	1	454	193	28639	0.378973	0.535284	-453	-192	Not significant
community43	community73	1	301	45	28940	0.379464	0.535284	-300	-44	Not significant
community41	community57	1	248	357	28681	0.380055	0.535586	-247	-356	Not significant
community50	community61	1	308	295	28683	0.3827	0.537709	-307	-294	Not significant
community48	community67	1	304	299	28683	0.382748	0.537709	-303	-298	Not significant
community36	community43	1	302	301	28683	0.382756	0.537709	-301	-300	Not significant
community36	community55	1	302	301	28683	0.382756	0.537709	-301	-300	Not significant
community43	community48	1	301	304	28681	0.38358	0.538447	-300	-303	Not significant
community17	community9	9	420	844	28014	0.384923	0.539475	-411	-835	Not significant
community13	community62	3	338	466	28480	0.385298	0.539475	-335	-463	Not significant
community16	community35	3	399	396	28489	0.38551	0.539475	-396	-393	Not significant
community38	community43	1	307	301	28678	0.38493	0.539475	-306	-300	Not significant
community38	community48	1	307	304	28675	0.386445	0.540363	-306	-303	Not significant
community17	community34	9	420	865	27993	0.38817	0.541454	-411	-856	Not significant
community25	community27	3	857	191	28236	0.387631	0.541454	-854	-188	Not significant
community14	community61	3	559	293	28432	0.388729	0.541454	-556	-290	Not significant
community38	community50	1	307	308	28671	0.388675	0.541454	-306	-307	Not significant
community44	community53	1	94	150	29042	0.388516	0.541454	-93	-149	Not significant
community13	community37	1	340	279	28667	0.389248	0.541758	-339	-278	Not significant
community35	community46	5	394	237	28651	0.391324	0.544227	-389	-232	Not significant
community34	community67	6	868	294	28119	0.393987	0.547509	-862	-288	Not significant
community14	community20	6	556	457	28268	0.395067	0.548494	-550	-451	Not significant
community58	community63	2	472	82	28731	0.395305	0.548494	-470	-80	Not significant
community14	community30	6	556	474	28251	0.397995	0.551376	-550	-468	Not significant
community35	community41	5	394	244	28644	0.397811	0.551376	-389	-239	Not significant
community25	community70	5	855	112	28315	0.39897	0.552302	-850	-107	Not significant
community31	community80	1	866	16	28404	0.400106	0.553449	-865	-15	Not significant
community11	community35	22	1340	377	27548	0.400827	0.554022	-1318	-355	Not significant
community13	community72	1	340	43	28903	0.402915	0.55648	-339	-42	Not significant
community60	community7	5	49	1960	27273	0.40985	0.565625	-44	-1955	Not significant
community57	community72	1	357	43	28886	0.418162	0.576213	-356	-42	Not significant
community50	community69	1	308	50	28928	0.418074	0.576213	-307	-49	Not significant
community49	community52	1	141	112	29033	0.423209	0.582722	-140	-111	Not significant
community16	community62	4	398	465	28420	0.424857	0.584098	-394	-461	Not significant
community35	community64	4	395	466	28422	0.424797	0.584098	-391	-462	Not significant
community23	community41	4	781	245	28257	0.426433	0.585817	-777	-241	Not significant
community60	community67	1	53	299	28934	0.426791	0.585862	-52	-298	Not significant
community12	community62	39	2756	430	26062	0.427658	0.586158	-2717	-391	Not significant
community42	community66	1	249	64	28973	0.42756	0.586158	-248	-63	Not significant
community2	community28	137	10695	255	18200	0.429589	0.58689	-10558	-118	Not significant
community17	community20	4	425	459	28399	0.430147	0.58689	-421	-455	Not significant
community66	community8	3	62	810	28412	0.429827	0.58689	-59	-807	Not significant
community36	community60	1	302	53	28931	0.429989	0.58689	-301	-52	Not significant
community43	community60	1	301	53	28932	0.428925	0.58689	-300	-52	Not significant
community55	community60	1	301	53	28932	0.428925	0.58689	-300	-52	Not significant
community1	community60	5	4064	49	25169	0.430828	0.587374	-4059	-44	Not significant
community33	community55	3	172	299	28813	0.432286	0.588471	-169	-296	Not significant
community48	community60	1	304	53	28929	0.432111	0.588471	-303	-52	Not significant
community50	community60	1	308	53	28925	0.436332	0.59353	-307	-52	Not significant
community20	community46	5	458	237	28587	0.439115	0.596865	-453	-232	Not significant
community41	community5	60	189	6397	22641	0.442662	0.601232	-129	-6337	Not significant
community52	community53	1	112	150	29024	0.44303	0.601278	-111	-149	Not significant
community21	community52	2	1010	111	28164	0.443558	0.601542	-1008	-109	Not significant
community4	community65	2	1018	114	28153	0.44466	0.602583	-1016	-112	Not significant
community31	community49	2	865	140	28280	0.44984	0.605122	-863	-138	Not significant
community53	community8	2	149	811	28325	0.449774	0.605122	-147	-809	Not significant
community30	community42	2	478	248	28559	0.44895	0.605122	-476	-246	Not significant
community30	community41	2	478	247	28560	0.448609	0.605122	-476	-245	Not significant
community41	community58	2	247	472	28566	0.447761	0.605122	-245	-470	Not significant
community16	community67	2	400	298	28587	0.449641	0.605122	-398	-296	Not significant
community35	community36	2	397	301	28587	0.449894	0.605122	-395	-299	Not significant
community35	community61	2	397	294	28594	0.44802	0.605122	-395	-292	Not significant
community28	community55	2	390	300	28595	0.448175	0.605122	-388	-298	Not significant
community54	community67	2	385	298	28602	0.447332	0.605122	-383	-296	Not significant
community1	community71	1	4068	3	25215	0.450296	0.605212	-4067	-2	Not significant
community34	community49	2	872	140	28273	0.451009	0.605267	-870	-138	Not significant
community16	community36	2	400	301	28584	0.450712	0.605267	-398	-299	Not significant
community1	community38	38	4031	270	24948	0.457133	0.613028	-3993	-232	Not significant
community14	community35	5	557	394	28331	0.459333	0.61552	-552	-389	Not significant
community24	community45	10	700	317	28260	0.465076	0.622752	-690	-307	Not significant
community27	community39	3	191	313	28780	0.469789	0.628596	-188	-310	Not significant
community19	community60	1	342	53	28891	0.470987	0.629732	-341	-52	Not significant
community23	community33	6	779	169	28333	0.477778	0.637936	-773	-163	Not significant
community17	community72	1	428	43	28815	0.477832	0.637936	-427	-42	Not significant
community61	community66	1	295	64	28927	0.483673	0.645256	-294	-63	Not significant
community21	community42	6	1006	244	28031	0.484513	0.645898	-1000	-238	Not significant
community57	community60	1	357	53	28876	0.485604	0.646873	-356	-52	Not significant
community66	community67	1	64	299	28923	0.488288	0.649969	-63	-298	Not significant
community37	community51	1	279	69	28938	0.489955	0.651705	-278	-68	Not significant
community31	community36	11	856	292	28128	0.49196	0.65389	-845	-281	Not significant
community10	community5	94	361	6363	22469	0.494453	0.656718	-267	-6269	Not significant
community38	community58	3	305	471	28508	0.496984	0.657719	-302	-468	Not significant
community20	community39	3	460	313	28511	0.497074	0.657719	-457	-310	Not significant
community38	community64	3	305	467	28512	0.496853	0.657719	-302	-464	Not significant
community38	community62	3	305	466	28513	0.496845	0.657719	-302	-463	Not significant
community10	community39	3	452	313	28519	0.496891	0.657719	-449	-310	Not significant
community38	community66	1	307	64	28915	0.497397	0.657719	-306	-63	Not significant
community19	community23	11	332	774	28170	0.499684	0.660257	-321	-763	Not significant
community45	community64	3	324	467	28493	0.501326	0.661941	-321	-464	Not significant
community33	community65	1	174	115	28997	0.50172	0.661976	-173	-114	Not significant
community47	community6	3	279	548	28457	0.502807	0.662925	-276	-545	Not significant
community31	community4	26	841	994	27426	0.509707	0.67153	-815	-968	Not significant
community12	community74	1	2794	27	26465	0.514112	0.676345	-2793	-26	Not significant
community51	community67	1	69	299	28918	0.514023	0.676345	-68	-298	Not significant
community30	community72	1	479	43	28764	0.516959	0.679593	-478	-42	Not significant
community23	community25	26	759	834	27668	0.519233	0.681588	-733	-808	Not significant
community68	community8	1	25	812	28449	0.519188	0.681588	-24	-811	Not significant
community1	community75	1	4068	4	25214	0.52668	0.681947	-4067	-3	Not significant
community40	community66	1	1135	64	28087	0.521313	0.681947	-1134	-63	Not significant
community34	community59	1	873	88	28325	0.52656	0.681947	-872	-87	Not significant
community31	community59	1	866	88	28332	0.525867	0.681947	-865	-87	Not significant
community25	community59	1	859	88	28339	0.525244	0.681947	-858	-87	Not significant
community59	community9	1	88	852	28346	0.524692	0.681947	-87	-851	Not significant
community79	community9	1	88	852	28346	0.524692	0.681947	-87	-851	Not significant
community59	community8	1	88	812	28386	0.522971	0.681947	-87	-811	Not significant
community14	community77	1	561	131	28594	0.525193	0.681947	-560	-130	Not significant
community30	community53	1	479	150	28657	0.525001	0.681947	-478	-149	Not significant
community42	community55	1	249	301	28736	0.527079	0.681947	-248	-300	Not significant
community46	community50	1	241	308	28737	0.526569	0.681947	-240	-307	Not significant
community41	community43	1	248	301	28737	0.526858	0.681947	-247	-300	Not significant
community46	community48	1	241	304	28741	0.526059	0.681947	-240	-303	Not significant
community36	community46	1	302	241	28743	0.525873	0.681947	-301	-240	Not significant
community41	community61	1	248	295	28743	0.526026	0.681947	-247	-294	Not significant
community46	community67	1	241	299	28746	0.525679	0.681947	-240	-298	Not significant
community46	community61	1	241	295	28750	0.525586	0.681947	-240	-294	Not significant
community16	community60	1	401	53	28832	0.526229	0.681947	-400	-52	Not significant
community38	community51	1	307	69	28910	0.523334	0.681947	-306	-68	Not significant
community42	community50	1	249	308	28729	0.528679	0.683035	-248	-307	Not significant
community41	community50	1	248	308	28730	0.528355	0.683035	-247	-307	Not significant
community17	community69	1	428	50	28808	0.529156	0.683161	-427	-49	Not significant
community14	community49	1	561	141	28584	0.5311	0.68518	-560	-140	Not significant
community44	community9	1	94	852	28340	0.53158	0.685308	-93	-851	Not significant
community18	community63	1	976	83	28227	0.532794	0.685941	-975	-82	Not significant
community41	community59	1	248	88	28950	0.532833	0.685941	-247	-87	Not significant
community20	community33	1	462	174	28650	0.53352	0.686335	-461	-173	Not significant
community31	community44	1	866	94	28326	0.53399	0.686449	-865	-93	Not significant
community33	community64	1	174	469	28643	0.535708	0.686697	-173	-468	Not significant
community42	community56	1	249	327	28710	0.535645	0.686697	-248	-326	Not significant
community41	community56	1	248	327	28711	0.535047	0.686697	-247	-326	Not significant
community41	community45	1	248	326	28712	0.534605	0.686697	-247	-325	Not significant
community33	community58	1	174	473	28639	0.537059	0.687831	-173	-472	Not significant
community37	community61	1	279	295	28712	0.537356	0.687831	-278	-294	Not significant
community17	community27	1	428	193	28665	0.537775	0.687879	-427	-192	Not significant
community47	community61	1	281	295	28710	0.53855	0.688381	-280	-294	Not significant
community19	community41	4	339	245	28699	0.54275	0.692933	-335	-241	Not significant
community36	community47	4	299	278	28706	0.542881	0.692933	-295	-274	Not significant
community40	community55	9	1127	293	27858	0.547225	0.697513	-1118	-284	Not significant
community34	community54	9	865	378	28035	0.547243	0.697513	-856	-369	Not significant
community17	community60	1	428	53	28805	0.549581	0.699997	-427	-52	Not significant
community61	community67	4	292	296	28695	0.551392	0.701807	-288	-292	Not significant
community46	community8	8	234	805	28240	0.553787	0.703593	-226	-797	Not significant
community20	community27	4	459	190	28634	0.553967	0.703593	-455	-186	Not significant
community36	community61	4	299	292	28692	0.553867	0.703593	-295	-288	Not significant
community48	community61	4	301	292	28690	0.555565	0.705125	-297	-288	Not significant
community23	community65	4	781	112	28390	0.556468	0.705277	-777	-108	Not significant
community41	community44	1	248	94	28944	0.556235	0.705277	-247	-93	Not significant
community36	community67	4	299	296	28688	0.557383	0.705828	-295	-292	Not significant
community42	community44	1	249	94	28943	0.557687	0.705828	-248	-93	Not significant
community1	community50	39	4030	270	24948	0.563169	0.712267	-3991	-231	Not significant
community46	community9	5	237	848	28197	0.564518	0.712971	-232	-843	Not significant
community42	community8	5	245	808	28229	0.56437	0.712971	-240	-803	Not significant
community58	community69	1	473	50	28763	0.565208	0.713342	-472	-49	Not significant
community20	community8	10	453	803	28021	0.566276	0.71419	-443	-793	Not significant
community6	community72	1	550	43	28693	0.566695	0.714218	-549	-42	Not significant
community39	community55	4	312	298	28673	0.571808	0.720158	-308	-294	Not significant
community52	community9	4	109	849	28325	0.57379	0.721797	-105	-845	Not significant
community33	community49	1	174	141	28971	0.573911	0.721797	-173	-140	Not significant
community61	community63	1	295	83	28908	0.57451	0.722047	-294	-82	Not significant
community22	community77	4	728	128	28427	0.575002	0.722161	-724	-124	Not significant
community20	community60	1	462	53	28771	0.577386	0.724499	-461	-52	Not significant
community51	community57	1	69	357	28860	0.577668	0.724499	-68	-356	Not significant
community32	community6	11	709	540	28027	0.578492	0.725027	-698	-529	Not significant
community39	community50	4	312	305	28666	0.579488	0.725266	-308	-301	Not significant
community63	community67	1	83	299	28904	0.57942	0.725266	-82	-298	Not significant
community20	community34	11	452	863	27961	0.580004	0.725408	-441	-852	Not significant
community1	community41	31	4038	218	25000	0.58079	0.725649	-4007	-187	Not significant
community23	community76	1	784	31	28471	0.581002	0.725649	-783	-30	Not significant
community60	community62	1	53	468	28765	0.582114	0.726534	-52	-467	Not significant
community60	community64	1	53	469	28764	0.582897	0.727007	-52	-468	Not significant
community28	community66	1	391	64	28831	0.583909	0.727764	-390	-63	Not significant
community1	community52	13	4056	100	25118	0.584922	0.728523	-4043	-87	Not significant
community58	community60	1	473	53	28760	0.586015	0.72938	-472	-52	Not significant
community48	community56	4	301	324	28658	0.588203	0.731058	-297	-320	Not significant
community34	community70	2	872	115	28298	0.588945	0.731058	-870	-113	Not significant
community31	community70	2	865	115	28305	0.5889	0.731058	-863	-113	Not significant
community23	community77	2	783	130	28372	0.589773	0.731058	-781	-128	Not significant
community32	community49	2	718	140	28427	0.589798	0.731058	-716	-138	Not significant
community3	community81	1	2493	9	26784	0.589416	0.731058	-2492	-8	Not significant
community35	community66	1	398	64	28824	0.590417	0.731322	-397	-63	Not significant
community17	community46	2	427	240	28618	0.591437	0.731356	-425	-238	Not significant
community13	community48	2	339	303	28643	0.591664	0.731356	-337	-301	Not significant
community39	community56	2	314	326	28645	0.591556	0.731356	-312	-324	Not significant
community13	community38	2	339	306	28640	0.592078	0.731366	-337	-304	Not significant
community5	community73	8	6449	38	22792	0.592965	0.731893	-6441	-30	Not significant
community55	community8	6	296	807	28178	0.594129	0.731893	-290	-801	Not significant
community43	community57	2	300	356	28629	0.594071	0.731893	-298	-354	Not significant
community55	community57	2	300	356	28629	0.594071	0.731893	-298	-354	Not significant
community48	community57	2	303	356	28626	0.595026	0.732496	-301	-354	Not significant
community59	community61	1	88	295	28903	0.595643	0.732754	-87	-294	Not significant
community61	community9	10	286	843	28148	0.599941	0.735319	-276	-833	Not significant
community10	community42	2	453	248	28584	0.600283	0.735319	-451	-246	Not significant
community10	community41	2	453	247	28585	0.599644	0.735319	-451	-245	Not significant
community39	community57	2	314	356	28615	0.59958	0.735319	-312	-354	Not significant
community21	community68	1	1011	25	28250	0.599366	0.735319	-1010	-24	Not significant
community59	community67	1	88	299	28899	0.600585	0.735319	-87	-298	Not significant
community37	community44	1	279	94	28913	0.599122	0.735319	-278	-93	Not significant
community4	community68	1	1019	25	28242	0.602304	0.736922	-1018	-24	Not significant
community14	community8	13	549	800	27925	0.603623	0.738034	-536	-787	Not significant
community36	community59	1	302	88	28896	0.604253	0.738304	-301	-87	Not significant
community1	community51	11	4058	59	25159	0.605514	0.739342	-4047	-48	Not significant
community25	community67	10	850	290	28137	0.606206	0.739343	-840	-280	Not significant
community51	community54	1	69	386	28831	0.606335	0.739343	-68	-385	Not significant
community38	community59	1	307	88	28891	0.610293	0.743665	-306	-87	Not significant
community25	community50	7	853	302	28125	0.611007	0.744032	-846	-295	Not significant
community27	community49	1	193	141	28952	0.611724	0.744402	-192	-140	Not significant
community16	community48	5	397	300	28585	0.616475	0.749677	-392	-295	Not significant
community17	community66	1	428	64	28794	0.617195	0.750046	-427	-63	Not significant
community31	community76	1	866	31	28389	0.617924	0.750426	-865	-30	Not significant
community39	community59	1	315	88	28883	0.619766	0.751649	-314	-87	Not significant
community44	community61	1	94	295	28897	0.619625	0.751649	-93	-294	Not significant
community42	community52	1	249	112	28925	0.621143	0.752812	-248	-111	Not significant
community35	community39	5	394	311	28577	0.624444	0.755968	-389	-306	Not significant
community44	community67	1	94	299	28893	0.624587	0.755968	-93	-298	Not significant
community14	community69	1	561	50	28675	0.62806	0.759662	-560	-49	Not significant
community2	community71	2	10830	2	18453	0.629806	0.761262	-10828	0	Not significant
community16	community56	3	399	325	28560	0.635107	0.766802	-396	-322	Not significant
community19	community54	3	340	384	28560	0.63524	0.766802	-337	-381	Not significant
community14	community46	3	559	239	28486	0.635902	0.767086	-556	-236	Not significant
community21	community6	21	991	530	27745	0.636585	0.767395	-970	-509	Not significant
community16	community19	3	399	340	28545	0.637281	0.767721	-396	-337	Not significant
community17	community45	3	426	324	28534	0.638959	0.769228	-423	-321	Not significant
community30	community61	3	477	293	28514	0.640451	0.770509	-474	-290	Not significant
community20	community38	3	460	305	28519	0.640989	0.770642	-457	-302	Not significant
community64	community7	34	436	1931	26886	0.641645	0.770916	-402	-1897	Not significant
community58	community7	34	440	1931	26882	0.643887	0.773094	-406	-1897	Not significant
community20	community24	9	454	701	28123	0.646273	0.775442	-445	-692	Not significant
community26	community73	2	884	44	28357	0.650562	0.780069	-882	-42	Not significant
community31	community33	6	861	169	28251	0.651716	0.780932	-855	-163	Not significant
community37	community6	6	274	545	28462	0.656937	0.786664	-268	-539	Not significant
community49	community67	2	140	298	28847	0.658954	0.788556	-138	-296	Not significant
community12	community4	101	2694	919	25573	0.664655	0.793796	-2593	-818	Not significant
community23	community64	14	771	456	28046	0.664364	0.793796	-757	-442	Not significant
community20	community44	2	461	93	28731	0.66392	0.793796	-459	-91	Not significant
community19	community30	4	339	476	28468	0.667724	0.796932	-335	-472	Not significant
community1	community5	886	3183	5571	19647	0.66873	0.797604	-2297	-4685	Not significant
community16	community52	2	400	111	28774	0.669839	0.798398	-398	-109	Not significant
community30	community44	2	478	93	28714	0.670406	0.798546	-476	-91	Not significant
community62	community8	11	458	802	28016	0.671242	0.798897	-447	-791	Not significant
community16	community17	4	398	425	28460	0.672032	0.798897	-394	-421	Not significant
community28	community70	2	390	115	28780	0.671662	0.798897	-388	-113	Not significant
community24	community6	11	699	540	28037	0.673298	0.799348	-688	-529	Not significant
community6	community63	2	549	82	28654	0.673121	0.799348	-547	-80	Not significant
community16	community65	2	400	114	28771	0.674859	0.800672	-398	-112	Not significant
community1	community27	29	4040	165	25053	0.676645	0.801783	-4011	-136	Not significant
community29	community73	2	1027	44	28214	0.676686	0.801783	-1025	-42	Not significant
community26	community60	2	884	52	28349	0.679215	0.804251	-882	-50	Not significant
community10	community35	7	448	392	28440	0.68134	0.806238	-441	-385	Not significant
community27	community42	2	192	248	28845	0.683046	0.807726	-190	-246	Not significant
community22	community51	2	730	68	28487	0.694812	0.8211	-728	-66	Not significant
community16	community40	17	385	1119	27766	0.695414	0.821273	-368	-1102	Not significant
community2	community66	22	10810	43	18412	0.69991	0.826041	-10788	-21	Not significant
community52	community62	2	111	467	28707	0.703176	0.829352	-109	-465	Not significant
community31	community42	8	859	242	28178	0.709144	0.835844	-851	-234	Not significant
community3	community44	9	2485	86	26707	0.711463	0.83748	-2476	-77	Not significant
community23	community47	6	779	276	28226	0.711247	0.83748	-773	-270	Not significant
community30	community65	2	478	114	28693	0.715704	0.841922	-476	-112	Not significant
community61	community8	9	287	804	28187	0.720959	0.846445	-278	-795	Not significant
community34	community66	2	872	63	28350	0.720951	0.846445	-870	-61	Not significant
community35	community49	2	397	140	28748	0.720321	0.846445	-395	-138	Not significant
community11	community72	1	1361	43	27882	0.722934	0.848211	-1360	-42	Not significant
community11	community73	1	1361	45	27880	0.724408	0.849387	-1360	-44	Not significant
community25	community51	1	859	69	28358	0.725282	0.849859	-858	-68	Not significant
community24	community63	1	709	83	28494	0.725761	0.849867	-708	-82	Not significant
community34	community7	61	813	1904	26509	0.73138	0.849905	-752	-1843	Not significant
community48	community9	7	298	846	28136	0.730088	0.849905	-291	-839	Not significant
community12	community68	3	2792	23	26469	0.733318	0.849905	-2789	-20	Not significant
community18	community66	1	976	64	28246	0.726702	0.849905	-975	-63	Not significant
community23	community63	1	784	83	28419	0.729796	0.849905	-783	-82	Not significant
community32	community44	1	719	94	28473	0.733096	0.849905	-718	-93	Not significant
community24	community44	1	709	94	28483	0.731863	0.849905	-708	-93	Not significant
community6	community70	1	550	116	28620	0.729133	0.849905	-549	-115	Not significant
community49	community58	1	141	473	28672	0.732413	0.849905	-140	-472	Not significant
community49	community64	1	141	469	28676	0.731739	0.849905	-140	-468	Not significant
community49	community62	1	141	468	28677	0.731576	0.849905	-140	-467	Not significant
community10	community77	1	454	131	28701	0.726833	0.849905	-453	-130	Not significant
community33	community54	1	174	386	28726	0.733147	0.849905	-173	-385	Not significant
community19	community27	1	342	193	28751	0.731803	0.849905	-341	-192	Not significant
community27	community56	1	193	327	28766	0.729043	0.849905	-192	-326	Not significant
community37	community46	1	279	241	28766	0.733344	0.849905	-278	-240	Not significant
community20	community53	1	462	150	28674	0.736035	0.851937	-461	-149	Not significant
community33	community35	1	174	398	28714	0.736043	0.851937	-173	-397	Not significant
community16	community33	1	401	174	28711	0.736839	0.852311	-400	-173	Not significant
community26	community38	10	876	298	28103	0.738033	0.852596	-866	-288	Not significant
community53	community64	1	150	469	28667	0.737677	0.852596	-149	-468	Not significant
community25	community63	3	857	81	28346	0.738766	0.852895	-854	-78	Not significant
community32	community54	8	712	379	28188	0.741763	0.855807	-704	-371	Not significant
community36	community41	3	300	246	28738	0.746041	0.860192	-297	-243	Not significant
community16	community27	3	399	191	28694	0.751232	0.865623	-396	-188	Not significant
community4	community67	9	1011	291	27976	0.752955	0.867054	-1002	-282	Not significant
community24	community52	3	707	110	28467	0.755762	0.86973	-704	-107	Not significant
community35	community7	28	371	1937	26951	0.762583	0.877019	-343	-1909	Not significant
community30	community33	3	477	172	28635	0.765221	0.879492	-474	-169	Not significant
community5	community58	107	6350	367	22463	0.780095	0.885288	-6243	-260	Not significant
community18	community28	14	963	378	27932	0.776037	0.885288	-949	-364	Not significant
community24	community49	4	706	138	28439	0.779911	0.885288	-702	-134	Not significant
community29	community63	3	1026	81	28177	0.770757	0.885288	-1023	-78	Not significant
community29	community59	2	1027	87	28171	0.772377	0.885288	-1025	-85	Not significant
community4	community59	2	1018	87	28180	0.772139	0.885288	-1016	-85	Not significant
community18	community44	2	975	93	28217	0.773075	0.885288	-973	-91	Not significant
community70	community9	2	115	851	28319	0.778524	0.885288	-113	-849	Not significant
community35	community42	2	397	248	28640	0.779503	0.885288	-395	-246	Not significant
community16	community46	2	400	240	28645	0.777405	0.885288	-398	-238	Not significant
community42	community54	2	248	385	28652	0.777025	0.885288	-246	-383	Not significant
community45	community48	2	325	303	28657	0.779543	0.885288	-323	-301	Not significant
community43	community56	2	300	326	28659	0.778929	0.885288	-298	-324	Not significant
community36	community45	2	301	325	28659	0.778951	0.885288	-299	-323	Not significant
community38	community39	2	306	314	28665	0.777506	0.885288	-304	-312	Not significant
community19	community37	2	341	278	28666	0.776568	0.885288	-339	-276	Not significant
community39	community67	2	314	298	28673	0.775797	0.885288	-312	-296	Not significant
community43	community50	2	300	307	28678	0.775016	0.885288	-298	-305	Not significant
community39	community47	2	314	280	28691	0.773751	0.885288	-312	-278	Not significant
community37	community39	2	278	314	28693	0.77369	0.885288	-276	-312	Not significant
community1	community21	137	3932	875	24343	0.7814	0.885316	-3795	-738	Not significant
community28	community29	12	380	1017	27878	0.781595	0.885316	-368	-1005	Not significant
community38	community56	4	304	324	28655	0.780789	0.885316	-300	-320	Not significant
community11	community36	15	1347	288	27637	0.783095	0.886161	-1332	-273	Not significant
community22	community49	4	728	138	28417	0.783325	0.886161	-724	-134	Not significant
community32	community5	155	565	6302	22265	0.784784	0.887255	-410	-6147	Not significant
community3	community72	4	2490	40	26753	0.787136	0.889355	-2486	-36	Not significant
community17	community21	13	416	999	27859	0.78917	0.891095	-403	-986	Not significant
community38	community57	4	304	354	28625	0.79241	0.894192	-300	-350	Not significant
community18	community65	4	973	112	28198	0.796291	0.897446	-969	-108	Not significant
community35	community47	4	395	278	28610	0.795832	0.897446	-391	-274	Not significant
community11	community63	4	1358	80	27845	0.797392	0.898126	-1354	-76	Not significant
community18	community70	4	973	113	28197	0.79791	0.898148	-969	-109	Not significant
community4	community64	17	1003	453	27814	0.80011	0.900061	-986	-436	Not significant
community29	community30	15	1014	465	27793	0.80188	0.900965	-999	-450	Not significant
community16	community61	3	399	293	28592	0.802414	0.900965	-396	-290	Not significant
community56	community57	3	325	355	28604	0.802327	0.900965	-322	-352	Not significant
community35	community48	3	396	302	28586	0.80294	0.900994	-393	-299	Not significant
community24	community32	16	694	704	27873	0.806821	0.904785	-678	-688	Not significant
community35	community56	5	394	323	28565	0.807527	0.905013	-389	-318	Not significant
community1	community56	47	4022	281	24937	0.809666	0.905754	-3975	-234	Not significant
community46	community6	5	237	546	28499	0.809261	0.905754	-232	-541	Not significant
community13	community28	5	336	387	28559	0.809697	0.905754	-331	-382	Not significant
community2	community55	114	10718	188	18267	0.810657	0.906265	-10604	-74	Not significant
community41	community6	5	244	546	28492	0.812727	0.907453	-239	-541	Not significant
community19	community35	5	338	394	28550	0.812539	0.907453	-333	-389	Not significant
community20	community48	5	458	300	28524	0.816984	0.911641	-453	-295	Not significant
community36	community62	5	298	464	28520	0.817974	0.91218	-293	-459	Not significant
community35	community57	5	394	353	28535	0.818845	0.912586	-389	-348	Not significant
community3	community42	22	2472	228	26565	0.820215	0.913548	-2450	-206	Not significant
community30	community36	5	475	298	28509	0.821884	0.914753	-470	-293	Not significant
community10	community45	4	451	323	28509	0.822313	0.914753	-447	-319	Not significant
community16	community54	4	398	383	28502	0.823978	0.916039	-394	-379	Not significant
community19	community20	4	339	459	28485	0.825337	0.916985	-335	-455	Not significant
community14	community36	6	556	297	28428	0.832894	0.92481	-550	-291	Not significant
community10	community28	5	450	387	28445	0.837168	0.928411	-445	-382	Not significant
community10	community54	5	450	382	28450	0.837042	0.928411	-445	-377	Not significant
community10	community20	6	449	457	28375	0.849098	0.941061	-443	-451	Not significant
community32	community55	6	714	296	28271	0.850429	0.941958	-708	-290	Not significant
community16	community6	8	394	543	28342	0.85204	0.943162	-386	-535	Not significant
community14	community16	8	554	394	28331	0.853975	0.944143	-546	-386	Not significant
community30	community62	8	472	461	28346	0.853622	0.944143	-464	-453	Not significant
community32	community45	7	713	320	28247	0.857897	0.947898	-706	-313	Not significant
community19	community24	7	336	703	28241	0.858843	0.948361	-329	-696	Not significant
community25	community36	9	851	294	28133	0.864629	0.954164	-842	-285	Not significant
community25	community39	8	852	308	28119	0.866215	0.955329	-844	-300	Not significant
community24	community35	10	700	389	28188	0.869175	0.958007	-690	-379	Not significant
community4	community43	11	1009	291	27976	0.87386	0.959648	-998	-280	Not significant
community16	community32	10	392	710	28175	0.871446	0.959648	-382	-700	Not significant
community21	community43	9	1003	293	27982	0.873359	0.959648	-994	-284	Not significant
community57	community9	9	349	844	28085	0.873528	0.959648	-340	-835	Not significant
community19	community31	9	334	858	28086	0.872444	0.959648	-325	-849	Not significant
community17	community24	9	420	701	28157	0.873534	0.959648	-411	-692	Not significant
community25	community54	10	850	377	28050	0.878854	0.963602	-840	-367	Not significant
community16	community8	10	392	803	28082	0.878273	0.963602	-382	-793	Not significant
community20	community32	10	453	710	28114	0.879066	0.963602	-443	-700	Not significant
community19	community4	12	331	1008	27936	0.882817	0.966972	-319	-996	Not significant
community22	community30	11	721	469	28086	0.883215	0.966972	-710	-458	Not significant
community31	community58	13	854	461	27959	0.891536	0.974413	-841	-448	Not significant
community25	community30	13	847	467	27960	0.891581	0.974413	-834	-454	Not significant
community14	community22	13	549	719	28006	0.891633	0.974413	-536	-706	Not significant
community20	community4	15	448	1005	27819	0.898274	0.980479	-433	-990	Not significant
community20	community21	15	448	997	27827	0.898215	0.980479	-433	-982	Not significant
community3	community31	72	2422	795	25998	0.901634	0.983551	-2350	-723	Not significant
community20	community5	103	360	6354	22470	0.910074	0.992156	-257	-6251	Not significant
community2	community53	56	10776	95	18360	1	1	-10720	-39	Not significant
community11	community29	48	1314	981	26944	0.939985	1	-1266	-933	Not significant
community1	community42	35	4034	215	25003	0.926939	1	-3999	-180	Not significant
community11	community17	20	1342	409	27516	1	1	-1322	-389	Not significant
community21	community35	13	999	386	27889	1	1	-986	-373	Not significant
community16	community25	11	391	849	28036	1	1	-380	-838	Not significant
community4	community48	10	1010	295	27972	1	1	-1000	-285	Not significant
community28	community8	10	382	803	28092	1	1	-372	-793	Not significant
community49	community7	9	133	1956	27189	1	1	-124	-1947	Not significant
community37	community4	9	271	1011	27996	1	1	-262	-1002	Not significant
community57	community8	9	349	804	28125	1	1	-340	-795	Not significant
community25	community38	9	851	299	28128	1	1	-842	-290	Not significant
community22	community28	9	723	383	28172	1	1	-714	-374	Not significant
community21	community41	8	1004	241	28034	1	1	-996	-233	Not significant
community55	community9	8	294	845	28140	1	1	-286	-837	Not significant
community67	community9	8	292	845	28142	1	1	-284	-837	Not significant
community37	community9	8	272	845	28162	1	1	-264	-837	Not significant
community24	community50	7	703	302	28275	1	1	-696	-295	Not significant
community30	community58	7	473	467	28340	1	1	-466	-460	Not significant
community1	community73	6	4063	40	25178	1	1	-4057	-34	Not significant
community44	community7	6	89	1959	27233	1	1	-83	-1953	Not significant
community16	community20	6	396	457	28428	1	1	-390	-451	Not significant
community14	community55	5	557	297	28428	1	1	-552	-292	Not significant
community36	community6	5	298	546	28438	1	1	-293	-541	Not significant
community17	community35	5	424	394	28464	1	1	-419	-389	Not significant
community20	community57	5	458	353	28471	1	1	-453	-348	Not significant
community17	community54	5	424	382	28476	1	1	-419	-377	Not significant
community10	community57	5	450	353	28479	1	1	-445	-348	Not significant
community10	community13	5	450	336	28496	1	1	-445	-331	Not significant
community20	community56	5	458	323	28501	1	1	-453	-318	Not significant
community14	community41	4	558	245	28480	1	1	-554	-241	Not significant
community16	community57	4	398	354	28531	1	1	-394	-350	Not significant
community10	community43	4	451	298	28534	1	1	-447	-294	Not significant
community17	community61	4	425	292	28566	1	1	-421	-288	Not significant
community41	community64	4	245	466	28572	1	1	-241	-462	Not significant
community16	community43	4	398	298	28587	1	1	-394	-294	Not significant
community35	community43	4	395	298	28590	1	1	-391	-294	Not significant
community35	community67	4	395	296	28592	1	1	-391	-292	Not significant
community54	community55	4	383	298	28602	1	1	-379	-294	Not significant
community13	community19	4	337	339	28607	1	1	-333	-335	Not significant
community15	community66	3	1693	62	27529	1	1	-1690	-59	Not significant
community18	community52	3	974	110	28200	1	1	-971	-107	Not significant
community31	community65	3	864	113	28307	1	1	-861	-110	Not significant
community25	community65	3	857	113	28314	1	1	-854	-110	Not significant
community30	community46	3	477	239	28568	1	1	-474	-236	Not significant
community16	community47	3	399	279	28606	1	1	-396	-276	Not significant
community16	community37	3	399	277	28608	1	1	-396	-274	Not significant
community35	community37	3	396	277	28611	1	1	-393	-274	Not significant
community17	community41	3	426	246	28612	1	1	-423	-243	Not significant
community47	community54	3	279	384	28621	1	1	-276	-381	Not significant
community16	community41	3	399	246	28639	1	1	-396	-243	Not significant
community19	community61	3	340	293	28651	1	1	-337	-290	Not significant
community56	community61	3	325	293	28666	1	1	-322	-290	Not significant
community2	community75	2	10830	3	18452	1	1	-10828	-1	Not significant
community31	community51	2	865	68	28352	1	1	-863	-66	Not significant
community22	community65	2	730	114	28441	1	1	-728	-112	Not significant
community22	community52	2	730	111	28444	1	1	-728	-109	Not significant
community32	community52	2	718	111	28456	1	1	-716	-109	Not significant
community22	community44	2	730	93	28462	1	1	-728	-91	Not significant
community24	community70	2	708	115	28462	1	1	-706	-113	Not significant
community24	community59	2	708	87	28490	1	1	-706	-85	Not significant
community58	community77	2	472	130	28683	1	1	-470	-128	Not significant
community20	community49	2	461	140	28684	1	1	-459	-138	Not significant
community46	community56	2	240	326	28719	1	1	-238	-324	Not significant
community41	community67	2	247	298	28740	1	1	-245	-296	Not significant
community5	community75	1	6456	4	22826	1	1	-6455	-3	Not significant
community3	community80	1	2493	16	26777	1	1	-2492	-15	Not significant
community15	community74	1	1695	27	27564	1	1	-1694	-26	Not significant
community15	community68	1	1695	25	27566	1	1	-1694	-24	Not significant
community4	community60	1	1019	53	28214	1	1	-1018	-52	Not significant
community21	community73	1	1011	45	28230	1	1	-1010	-44	Not significant
community21	community72	1	1011	43	28232	1	1	-1010	-42	Not significant
community18	community60	1	976	53	28257	1	1	-975	-52	Not significant
community18	community72	1	976	43	28267	1	1	-975	-42	Not significant
community26	community69	1	885	50	28351	1	1	-884	-49	Not significant
community26	community72	1	885	43	28358	1	1	-884	-42	Not significant
community60	community9	1	53	852	28381	1	1	-52	-851	Not significant
community51	community8	1	69	812	28405	1	1	-68	-811	Not significant
community60	community8	1	53	812	28421	1	1	-52	-811	Not significant
community73	community8	1	45	812	28429	1	1	-44	-811	Not significant
community72	community8	1	43	812	28431	1	1	-42	-811	Not significant
community23	community51	1	784	69	28433	1	1	-783	-68	Not significant
community23	community69	1	784	50	28452	1	1	-783	-49	Not significant
community22	community73	1	731	45	28510	1	1	-730	-44	Not significant
community32	community60	1	719	53	28514	1	1	-718	-52	Not significant
community32	community69	1	719	50	28517	1	1	-718	-49	Not significant
community24	community60	1	709	53	28524	1	1	-708	-52	Not significant
community14	community59	1	561	88	28637	1	1	-560	-87	Not significant
community30	community52	1	479	112	28695	1	1	-478	-111	Not significant
community62	community70	1	468	116	28702	1	1	-467	-115	Not significant
community62	community65	1	468	115	28703	1	1	-467	-114	Not significant
community20	community52	1	462	112	28712	1	1	-461	-111	Not significant
community30	community59	1	479	88	28719	1	1	-478	-87	Not significant
community30	community79	1	479	88	28719	1	1	-478	-87	Not significant
community44	community58	1	94	473	28719	1	1	-93	-472	Not significant
community44	community64	1	94	469	28723	1	1	-93	-468	Not significant
community44	community62	1	94	468	28724	1	1	-93	-467	Not significant
community58	community79	1	473	88	28725	1	1	-472	-87	Not significant
community59	community64	1	88	469	28729	1	1	-87	-468	Not significant
community62	community63	1	468	83	28735	1	1	-467	-82	Not significant
community20	community59	1	462	88	28736	1	1	-461	-87	Not significant
community30	community66	1	479	64	28743	1	1	-478	-63	Not significant
community10	community59	1	454	88	28744	1	1	-453	-87	Not significant
community10	community79	1	454	88	28744	1	1	-453	-87	Not significant
community17	community52	1	428	112	28746	1	1	-427	-111	Not significant
community58	community66	1	473	64	28749	1	1	-472	-63	Not significant
community35	community77	1	398	131	28757	1	1	-397	-130	Not significant
community10	community51	1	454	69	28763	1	1	-453	-68	Not significant
community17	community44	1	428	94	28764	1	1	-427	-93	Not significant
community16	community70	1	401	116	28769	1	1	-400	-115	Not significant
community28	community65	1	391	115	28780	1	1	-390	-114	Not significant
community28	community52	1	391	112	28783	1	1	-390	-111	Not significant
community54	community65	1	386	115	28785	1	1	-385	-114	Not significant
community49	community57	1	141	357	28788	1	1	-140	-356	Not significant
community52	community54	1	112	386	28788	1	1	-111	-385	Not significant
community16	community59	1	401	88	28797	1	1	-400	-87	Not significant
community33	community39	1	174	315	28797	1	1	-173	-314	Not significant
community35	community59	1	398	88	28800	1	1	-397	-87	Not significant
community28	community44	1	391	94	28801	1	1	-390	-93	Not significant
community16	community63	1	401	83	28802	1	1	-400	-82	Not significant
community33	community50	1	174	308	28804	1	1	-173	-307	Not significant
community28	community79	1	391	88	28807	1	1	-390	-87	Not significant
community33	community61	1	174	295	28817	1	1	-173	-294	Not significant
community49	community56	1	141	327	28818	1	1	-140	-326	Not significant
community45	community49	1	326	141	28819	1	1	-325	-140	Not significant
community19	community70	1	342	116	28828	1	1	-341	-115	Not significant
community13	community70	1	340	116	28830	1	1	-339	-115	Not significant
community13	community65	1	340	115	28831	1	1	-339	-114	Not significant
community48	community53	1	304	150	28832	1	1	-303	-149	Not significant
community36	community53	1	302	150	28834	1	1	-301	-149	Not significant
community38	community49	1	307	141	28838	1	1	-306	-140	Not significant
community43	community49	1	301	141	28844	1	1	-300	-140	Not significant
community45	community70	1	326	116	28844	1	1	-325	-115	Not significant
community50	community77	1	308	131	28847	1	1	-307	-130	Not significant
community45	community52	1	326	112	28848	1	1	-325	-111	Not significant
community39	community70	1	315	116	28855	1	1	-314	-115	Not significant
community33	community42	1	174	249	28863	1	1	-173	-248	Not significant
community47	community49	1	281	141	28864	1	1	-280	-140	Not significant
community37	community49	1	279	141	28866	1	1	-278	-140	Not significant
community48	community70	1	304	116	28866	1	1	-303	-115	Not significant
community48	community65	1	304	115	28867	1	1	-303	-114	Not significant
community36	community65	1	302	115	28869	1	1	-301	-114	Not significant
community48	community52	1	304	112	28870	1	1	-303	-111	Not significant
community52	community61	1	112	295	28879	1	1	-111	-294	Not significant
community41	community53	1	248	150	28888	1	1	-247	-149	Not significant
community37	community65	1	279	115	28892	1	1	-278	-114	Not significant
community46	community49	1	241	141	28904	1	1	-240	-140	Not significant
community42	community70	1	249	116	28921	1	1	-248	-115	Not significant
community42	community65	1	249	115	28922	1	1	-248	-114	Not significant

## Sheet: Com-Cancer interaction (All)
Cluster	Cancermine	Matches	Targets	TotalMatches	Total	pValues (hypergeometric test)	FDR			Column	Description
community2	breast cancer	111	312	946	13324	7.99927e-50	3.47168e-46			Matches	The number of genes in the community that match the disease
community2	acute myeloid leukemia	61	312	279	13324	2.77027e-42	6.01149e-39			Targets	The number of genes in the community
community2	lung cancer	71	312	487	13324	5.59301e-37	8.09122e-34			TotalMatches	The diease contains the number of communities
community2	leukemia	56	312	305	13324	1.82986e-34	1.9854e-31			Total	Total number of community-disease networks
community2	hepatocellular carcinoma	86	312	818	13324	5.46108e-34	4.74022e-31
community2	colorectal cancer	56	312	444	13324	9.0335e-26	6.53423e-23
community2	melanoma	48	312	354	13324	1.67682e-23	1.03963e-20
community3	hepatocellular carcinoma	66	279	818	13324	3.21202e-22	1.74252e-19
community2	prostate cancer	52	312	478	13324	5.6748e-21	2.73651e-18
community2	pancreatic cancer	42	312	305	13324	6.76334e-21	2.93529e-18
community3	breast cancer	69	279	946	13324	8.59409e-21	3.39076e-18
community2	lung non-small cell carcinoma	49	312	434	13324	1.77724e-20	6.42768e-18
community1	hepatocellular carcinoma	74	373	818	13324	5.62283e-20	1.87716e-17
community1	breast cancer	79	373	946	13324	3.11996e-19	9.67188e-17
community2	glioblastoma	40	312	337	13324	1.31575e-17	3.8069e-15
community25	breast cancer	25	49	946	13324	1.60068e-16	4.34184e-14
community2	stomach cancer	43	312	437	13324	7.53947e-16	1.92478e-13
community2	urinary bladder cancer	30	312	215	13324	2.3283e-15	5.61379e-13
community18	brain glioma	18	58	407	13324	5.07687e-14	1.15966e-11
community2	pancreatic ductal adenocarcinoma	26	312	179	13324	6.90987e-14	1.49944e-11
community2	brain glioma	38	312	407	13324	2.13307e-13	4.40834e-11
community2	lung squamous cell carcinoma	18	312	80	13324	2.43645e-13	4.80645e-11
community2	lymphoma	24	312	159	13324	2.75402e-13	4.99543e-11
community30	hepatocellular carcinoma	19	40	818	13324	2.76245e-13	4.99543e-11
community2	kidney cancer	18	312	82	13324	3.83739e-13	6.66171e-11
community23	retinoblastoma	10	50	83	13324	4.13926e-13	6.90938e-11
community42	acute myeloid leukemia	12	31	279	13324	5.39386e-13	8.67013e-11
community2	ovarian cancer	34	312	341	13324	6.66894e-13	1.03369e-10
community44	angiosarcoma	6	27	19	13324	1.01365e-12	1.51698e-10
community18	lung cancer	18	58	487	13324	1.06629e-12	1.54257e-10
community18	breast cancer	23	58	946	13324	2.08872e-12	2.90153e-10
community3	colorectal cancer	36	279	444	13324	2.13938e-12	2.90153e-10
community2	diffuse large B-cell lymphoma	18	312	91	13324	2.53104e-12	3.3287e-10
community1	colorectal cancer	42	373	444	13324	2.89243e-12	3.6921e-10
community23	hepatocellular carcinoma	20	50	818	13324	3.41469e-12	4.23422e-10
community42	hepatocellular carcinoma	16	31	818	13324	4.19239e-12	4.99603e-10
community15	breast cancer	24	65	946	13324	4.25929e-12	4.99603e-10
community2	medulloblastoma	17	312	83	13324	5.73489e-12	6.54985e-10
community3	pancreatic cancer	29	279	305	13324	7.38457e-12	8.2177e-10
community44	malignant peripheral nerve sheath tumor	6	27	26	13324	8.50678e-12	9.22986e-10
community2	esophagus squamous cell carcinoma	25	312	204	13324	9.89549e-12	1.04747e-09
community25	acute myeloid leukemia	13	49	279	13324	1.42938e-11	1.47703e-09
community2	synovial sarcoma	9	312	16	13324	1.83955e-11	1.85666e-09
community12	hepatocellular carcinoma	23	74	818	13324	3.5327e-11	3.48453e-09
community42	leukemia	11	31	305	13324	4.09747e-11	3.95178e-09
community44	pancreatic carcinoma	6	27	35	13324	5.9127e-11	5.5785e-09
community44	malignant astrocytoma	6	27	36	13324	7.08402e-11	6.54141e-09
community3	stomach cancer	33	279	437	13324	1.21137e-10	1.09528e-08
community2	osteosarcoma	25	312	233	13324	1.76088e-10	1.55964e-08
community18	lung non-small cell carcinoma	15	58	434	13324	2.91861e-10	2.51703e-08
community2	neuroblastoma	19	312	135	13324	2.9578e-10	2.51703e-08
community44	transitional cell carcinoma	5	27	20	13324	3.49171e-10	2.91423e-08
community60	diffuse large B-cell lymphoma	6	16	91	13324	6.45005e-10	5.23799e-08
community18	hepatocellular carcinoma	19	58	818	13324	6.52128e-10	5.23799e-08
community1	lung cancer	40	373	487	13324	6.70686e-10	5.23799e-08
community25	leukemia	12	49	305	13324	6.7587e-10	5.23799e-08
community13	hepatocellular carcinoma	21	72	818	13324	9.15929e-10	6.97392e-08
community2	lung small cell carcinoma	14	312	73	13324	1.0817e-09	8.0941e-08
community1	glioblastoma	32	373	337	13324	1.11917e-09	8.23254e-08
community3	prostate cancer	33	279	478	13324	1.18046e-09	8.53866e-08
community44	brain cancer	6	27	57	13324	1.27664e-09	9.08298e-08
community1	stomach cancer	37	373	437	13324	1.32086e-09	9.24602e-08
community1	cervical cancer	24	373	199	13324	1.34337e-09	9.25433e-08
community2	myeloid leukemia	12	312	51	13324	1.43703e-09	9.74486e-08
community44	cervix carcinoma	5	27	26	13324	1.46681e-09	9.79378e-08
community3	lung cancer	33	279	487	13324	1.8753e-09	1.23315e-07
community3	ovarian cancer	27	279	341	13324	2.29443e-09	1.48624e-07
community3	osteosarcoma	22	279	233	13324	3.04865e-09	1.94576e-07
community2	cholangiocarcinoma	11	312	44	13324	3.51308e-09	2.17811e-07
community2	T-cell acute lymphoblastic leukemia	11	312	44	13324	3.51308e-09	2.17811e-07
community1	prostate cancer	38	373	478	13324	4.40974e-09	2.65832e-07
community44	esophagus squamous cell carcinoma	8	27	204	13324	4.41011e-09	2.65832e-07
community24	lung adenocarcinoma	10	49	219	13324	5.19261e-09	3.06809e-07
community44	skin melanoma	5	27	33	13324	5.2313e-09	3.06809e-07
community3	colon cancer	23	279	262	13324	5.3278e-09	3.08302e-07
community15	prostate cancer	15	65	478	13324	5.96183e-09	3.40452e-07
community3	brain glioma	29	279	407	13324	6.20682e-09	3.46647e-07
community29	breast cancer	16	41	946	13324	6.23007e-09	3.46647e-07
community26	hepatocellular carcinoma	16	47	818	13324	7.74321e-09	4.25386e-07
community44	lung carcinoma	5	27	37	13324	9.54447e-09	5.17787e-07
community44	lung squamous cell carcinoma	6	27	80	13324	1.01932e-08	5.46154e-07
community1	lung non-small cell carcinoma	35	373	434	13324	1.27163e-08	6.68161e-07
community13	colon cancer	12	72	262	13324	1.27782e-08	6.68161e-07
community53	basal cell carcinoma	4	21	18	13324	1.37052e-08	7.08102e-07
community12	colorectal cancer	15	74	444	13324	1.44686e-08	7.3875e-07
community42	brain glioma	10	31	407	13324	1.49035e-08	7.52107e-07
community1	acute myeloid leukemia	27	373	279	13324	1.51384e-08	7.5518e-07
community18	glioblastoma	12	58	337	13324	1.6132e-08	7.94878e-07
community44	skin cancer	5	27	41	13324	1.63005e-08	7.94878e-07
community44	melanoma	9	27	354	13324	1.74378e-08	8.33957e-07
community53	prostate cancer	9	21	478	13324	1.74862e-08	8.33957e-07
community60	lymphoma	6	16	159	13324	1.87473e-08	8.84384e-07
community2	B-cell lymphoma	14	312	91	13324	2.07467e-08	9.67561e-07
community1	ovarian cancer	30	373	341	13324	2.09564e-08	9.67561e-07
community44	lymphoma	7	27	159	13324	2.13064e-08	9.73366e-07
community13	glioblastoma	13	72	337	13324	2.27815e-08	1.02991e-06
community23	breast cancer	17	50	946	13324	2.3326e-08	1.04366e-06
community2	liver cancer	21	312	214	13324	2.45568e-08	1.08752e-06
community2	hematologic cancer	11	312	53	13324	2.84041e-08	1.24519e-06
community1	brain glioma	33	373	407	13324	2.92417e-08	1.26909e-06
community2	meningioma	10	312	42	13324	3.03309e-08	1.30333e-06
community23	colon cancer	10	50	262	13324	3.48211e-08	1.4816e-06
community44	pancreatic adenocarcinoma	4	27	18	13324	3.9935e-08	1.6827e-06
community24	melanoma	11	49	354	13324	4.31271e-08	1.79973e-06
community42	ovarian cancer	9	31	341	13324	4.90977e-08	2.02937e-06
community44	acute myeloid leukemia	8	27	279	13324	5.02662e-08	2.05807e-06
community44	acute leukemia	5	27	52	13324	5.55094e-08	2.2515e-06
community13	lung non-small cell carcinoma	14	72	434	13324	5.71364e-08	2.29604e-06
community42	breast cancer	13	31	946	13324	6.00967e-08	2.32853e-06
community17	breast cancer	18	59	946	13324	6.01026e-08	2.32853e-06
community42	lymphoma	7	31	159	13324	6.0255e-08	2.32853e-06
community15	lung cancer	14	65	487	13324	6.07961e-08	2.32853e-06
community7	breast cancer	30	145	946	13324	6.08721e-08	2.32853e-06
community15	glioblastoma	12	65	337	13324	6.1245e-08	2.32853e-06
community2	chronic lymphocytic leukemia	13	312	84	13324	6.17006e-08	2.32853e-06
community42	melanoma	9	31	354	13324	6.75201e-08	2.52618e-06
community44	bone sarcoma	3	27	5	13324	7.39443e-08	2.74289e-06
community24	thymus lymphoma	4	49	12	13324	7.77669e-08	2.86024e-06
community3	lung non-small cell carcinoma	28	279	434	13324	9.04918e-08	3.30029e-06
community44	testicular germ cell cancer	4	27	22	13324	9.48072e-08	3.42886e-06
community25	prostate cancer	12	49	478	13324	9.79199e-08	3.51217e-06
community44	lung non-small cell carcinoma	9	27	434	13324	9.94794e-08	3.53886e-06
community12	breast cancer	20	74	946	13324	1.04276e-07	3.67933e-06
community15	hereditary diffuse gastric cancer	3	65	3	13324	1.10822e-07	3.86413e-06
community25	hepatocellular carcinoma	15	49	818	13324	1.11294e-07	3.86413e-06
community24	lung cancer	12	49	487	13324	1.19655e-07	4.12145e-06
community42	Hodgkin's lymphoma	4	31	21	13324	1.38602e-07	4.73648e-06
community44	adrenal cortex cancer	3	27	6	13324	1.47622e-07	5.00531e-06
community55	breast cancer	10	19	946	13324	1.49232e-07	5.02067e-06
community44	oral squamous cell carcinoma	5	27	64	13324	1.59636e-07	5.32939e-06
community44	liver cancer	7	27	214	13324	1.62307e-07	5.37719e-06
community5	breast cancer	38	220	946	13324	1.6896e-07	5.5552e-06
community60	osteosarcoma	6	16	233	13324	1.80914e-07	5.90351e-06
community44	lung adenocarcinoma	7	27	219	13324	1.8977e-07	6.14628e-06
community44	hepatocellular carcinoma	11	27	818	13324	2.09994e-07	6.75092e-06
community44	head and neck squamous cell carcinoma	6	27	136	13324	2.43856e-07	7.78188e-06
community44	neurofibroma	3	27	7	13324	2.57873e-07	8.10992e-06
community44	penile cancer	3	27	7	13324	2.57873e-07	8.10992e-06
community29	leukemia	9	41	305	13324	2.61884e-07	8.17681e-06
community2	small-cell carcinoma of the ovary of hypercalcemic type	4	312	4	13324	2.95048e-07	9.14649e-06
community60	breast cancer	9	16	946	13324	3.037e-07	9.34793e-06
community44	lung small cell carcinoma	5	27	73	13324	3.09817e-07	9.46905e-06
community44	endometrial cancer	5	27	74	13324	3.31715e-07	1.00674e-05
community3	leukemia	22	279	305	13324	3.48908e-07	1.05157e-05
community2	atypical teratoid rhabdoid tumor	6	312	14	13324	3.92085e-07	1.17355e-05
community44	small cell carcinoma	3	27	8	13324	4.11853e-07	1.22428e-05
community44	squamous cell carcinoma	5	27	78	13324	4.31844e-07	1.27497e-05
community44	malignant mesothelioma	4	27	32	13324	4.58066e-07	1.33425e-05
community15	brain glioma	12	65	407	13324	4.58072e-07	1.33425e-05
community30	colorectal carcinoma	5	40	53	13324	4.75828e-07	1.37673e-05
community30	colorectal cancer	10	40	444	13324	4.79269e-07	1.3775e-05
community2	gastrointestinal system cancer	9	312	43	13324	4.86599e-07	1.38937e-05
community3	glioblastoma	23	279	337	13324	4.93075e-07	1.39009e-05
community7	hepatocellular carcinoma	26	145	818	13324	4.93259e-07	1.39009e-05
community23	colorectal cancer	11	50	444	13324	5.12006e-07	1.43362e-05
community13	colorectal cancer	13	72	444	13324	5.32935e-07	1.48265e-05
community44	oligodendroglioma	3	27	9	13324	6.16667e-07	1.69388e-05
community44	breast ductal carcinoma	3	27	9	13324	6.16667e-07	1.69388e-05
community26	liver cancer	8	47	214	13324	6.64899e-07	1.81488e-05
community42	endometrial cancer	5	31	74	13324	6.83775e-07	1.84949e-05
community18	prostate cancer	12	58	478	13324	6.86101e-07	1.84949e-05
community2	cervical cancer	18	312	199	13324	7.93773e-07	2.12653e-05
community42	nasopharynx carcinoma	5	31	77	13324	8.3374e-07	2.21646e-05
community42	prostate cancer	9	31	478	13324	8.37557e-07	2.21646e-05
community24	prostate cancer	11	49	478	13324	8.48139e-07	2.23086e-05
community51	T-cell acute lymphoblastic leukemia	4	23	44	13324	8.64901e-07	2.26125e-05
community44	adrenocortical carcinoma	3	27	10	13324	8.79365e-07	2.26619e-05
community44	sporadic breast cancer	3	27	10	13324	8.79365e-07	2.26619e-05
community44	brain glioma	8	27	407	13324	8.82456e-07	2.26619e-05
community15	lung non-small cell carcinoma	12	65	434	13324	8.95117e-07	2.28518e-05
community44	stomach carcinoma	4	27	38	13324	9.30549e-07	2.3263e-05
community44	B-cell lymphoma	5	27	91	13324	9.3094e-07	2.3263e-05
community44	diffuse large B-cell lymphoma	5	27	91	13324	9.3094e-07	2.3263e-05
community30	prostate cancer	10	40	478	13324	9.32666e-07	2.3263e-05
community24	urinary bladder cancer	8	49	215	13324	9.56916e-07	2.37235e-05
community7	stomach cancer	18	145	437	13324	9.6206e-07	2.37235e-05
community23	prostate cancer	11	50	478	13324	1.04911e-06	2.57239e-05
community13	cervical cancer	9	72	199	13324	1.0599e-06	2.58425e-05
community3	esophagus squamous cell carcinoma	17	279	204	13324	1.08004e-06	2.61864e-05
community1	pancreatic cancer	25	373	305	13324	1.11693e-06	2.69304e-05
community34	brain glioma	9	37	407	13324	1.12864e-06	2.70624e-05
community44	head and neck cancer	4	27	40	13324	1.14812e-06	2.73782e-05
community44	serous cystadenocarcinoma	3	27	11	13324	1.20695e-06	2.86238e-05
community44	pancreatic ductal adenocarcinoma	6	27	179	13324	1.21618e-06	2.8686e-05
community42	anaplastic large cell lymphoma	3	31	10	13324	1.34852e-06	3.16356e-05
community44	meningioma	4	27	42	13324	1.4013e-06	3.2697e-05
community53	clear cell renal cell carcinoma	5	21	131	13324	1.4874e-06	3.45204e-05
community44	stomach cancer	8	27	437	13324	1.49853e-06	3.45937e-05
community60	glioblastoma	6	16	337	13324	1.5603e-06	3.58291e-05
community24	lymphoma	7	49	159	13324	1.60009e-06	3.65494e-05
community72	T-cell large granular lymphocyte leukemia	2	6	5	13324	1.68847e-06	3.83663e-05
community44	pancreatic cancer	7	27	305	13324	1.73754e-06	3.92756e-05
community2	clear cell renal cell carcinoma	14	312	131	13324	1.90899e-06	4.27094e-05
community42	diffuse large B-cell lymphoma	5	31	91	13324	1.90913e-06	4.27094e-05
community1	urinary bladder cancer	20	373	215	13324	1.97151e-06	4.38787e-05
community13	urinary bladder cancer	9	72	215	13324	1.99568e-06	4.41901e-05
community2	renal cell carcinoma	12	312	96	13324	2.01767e-06	4.44502e-05
community21	breast cancer	15	53	946	13324	2.09501e-06	4.59209e-05
community22	leukemia	9	52	305	13324	2.14611e-06	4.68046e-05
community3	urinary bladder cancer	17	279	215	13324	2.18988e-06	4.75204e-05
community44	cervical cancer	6	27	199	13324	2.243e-06	4.84309e-05
community12	ovarian cancer	11	74	341	13324	2.25482e-06	4.84451e-05
community18	melanoma	10	58	354	13324	2.29232e-06	4.90082e-05
community60	retinoblastoma	4	16	83	13324	2.37236e-06	5.04708e-05
community1	lung adenocarcinoma	20	373	219	13324	2.59984e-06	5.50405e-05
community18	thyroid gland cancer	6	58	92	13324	2.65308e-06	5.5895e-05
community2	colon cancer	20	312	262	13324	2.6866e-06	5.63277e-05
community25	glioblastoma	9	49	337	13324	2.88471e-06	6.01906e-05
community44	prostate cancer	8	27	478	13324	2.90628e-06	6.03246e-05
community13	stomach cancer	12	72	437	13324	2.91893e-06	6.03246e-05
community2	lung adenocarcinoma	18	312	219	13324	3.046e-06	6.26523e-05
community2	rhabdoid cancer	6	312	19	13324	3.1535e-06	6.45575e-05
community29	erythroleukemia	3	41	10	13324	3.18124e-06	6.48196e-05
community1	colon cancer	22	373	262	13324	3.26548e-06	6.62252e-05
community7	prostate cancer	18	145	478	13324	3.31895e-06	6.69965e-05
community44	glioblastoma	7	27	337	13324	3.34759e-06	6.72618e-05
community18	liver cancer	8	58	214	13324	3.41223e-06	6.7966e-05
community23	lung non-small cell carcinoma	10	50	434	13324	3.41396e-06	6.7966e-05
community1	esophagus squamous cell carcinoma	19	373	204	13324	3.45021e-06	6.8374e-05
community44	colorectal carcinoma	4	27	53	13324	3.59675e-06	7.08886e-05
community44	ovarian cancer	7	27	341	13324	3.61616e-06	7.08886e-05
community23	stomach cancer	10	50	437	13324	3.6261e-06	7.08886e-05
community44	acute lymphoblastic leukemia	4	27	54	13324	3.87775e-06	7.52758e-05
community44	adenosarcoma	2	27	2	13324	3.95458e-06	7.52758e-05
community44	familial melanoma	2	27	2	13324	3.95458e-06	7.52758e-05
community44	marginal zone B-cell lymphoma	2	27	2	13324	3.95458e-06	7.52758e-05
community44	ovarian carcinosarcoma	2	27	2	13324	3.95458e-06	7.52758e-05
community44	ovary epithelial cancer	2	27	2	13324	3.95458e-06	7.52758e-05
community60	renal cell carcinoma	4	16	96	13324	4.23837e-06	8.03254e-05
community3	squamous cell carcinoma	10	279	78	13324	4.3229e-06	8.15712e-05
community14	breast cancer	17	70	946	13324	4.36766e-06	8.20591e-05
community18	malignant peripheral nerve sheath tumor	4	58	26	13324	4.41884e-06	8.26628e-05
community9	stomach cancer	15	116	437	13324	4.53522e-06	8.44758e-05
community7	pancreatic cancer	14	145	305	13324	4.78798e-06	8.88027e-05
community1	head and neck squamous cell carcinoma	15	373	136	13324	4.84027e-06	8.93905e-05
community1	melanoma	26	373	354	13324	4.93007e-06	9.06632e-05
community13	ocular melanoma	3	72	7	13324	5.18714e-06	9.49881e-05
community18	leukemia	9	58	305	13324	5.42541e-06	9.84791e-05
community42	myeloid leukemia	4	31	51	13324	5.44469e-06	9.84791e-05
community2	myeloid neoplasm	7	312	31	13324	5.44585e-06	9.84791e-05
community44	osteosarcoma	6	27	233	13324	5.53392e-06	9.96565e-05
community39	lung non-small cell carcinoma	8	32	434	13324	5.73217e-06	0.0001028
community30	head and neck cancer	4	40	40	13324	5.77161e-06	0.000103081
community44	esophagus adenocarcinoma	3	27	18	13324	5.89397e-06	0.000104835
community24	skin melanoma	4	49	33	13324	5.98714e-06	0.000106058
community42	esophagus squamous cell carcinoma	6	31	204	13324	6.06044e-06	0.00010692
community24	breast carcinoma	5	49	72	13324	6.10941e-06	0.000107348
community21	ovarian cancer	9	53	341	13324	6.18413e-06	0.000108222
community15	stomach cancer	11	65	437	13324	6.43596e-06	0.000111925
community44	neuroblastoma	5	27	135	13324	6.44962e-06	0.000111925
community1	osteosarcoma	20	373	233	13324	6.47308e-06	0.000111925
community8	breast cancer	26	145	946	13324	6.67184e-06	0.000114904
community6	breast cancer	28	163	946	13324	6.9775e-06	0.000119375
community44	rhabdoid cancer	3	27	19	13324	6.98646e-06	0.000119375
community2	endometrial cancer	10	312	74	13324	7.08752e-06	0.000120223
community7	cholangiocarcinoma	6	145	44	13324	7.0915e-06	0.000120223
community23	lung small cell carcinoma	5	50	73	13324	7.22597e-06	0.000122026
community34	hepatocellular carcinoma	11	37	818	13324	7.36129e-06	0.000123505
community19	acute promyelocytic leukemia	4	55	31	13324	7.37044e-06	0.000123505
community15	colorectal cancer	11	65	444	13324	7.45826e-06	0.000124496
community31	polycythemia vera	2	38	2	13324	7.92043e-06	0.000131704
community23	cervical cancer	7	50	199	13324	7.97513e-06	0.000132107
community44	uveal melanoma	3	27	20	13324	8.20454e-06	0.000135391
community30	T-cell acute lymphoblastic leukemia	4	40	44	13324	8.4806e-06	0.000139416
community13	lung cancer	12	72	487	13324	8.61217e-06	0.000141045
community30	intestinal cancer	3	40	14	13324	8.84934e-06	0.000144384
community13	brain glioma	11	72	407	13324	9.02984e-06	0.000146777
community23	lung cancer	10	50	487	13324	9.26693e-06	0.000149558
community72	nasal type extranodal NK/T-cell lymphoma	2	6	11	13324	9.26986e-06	0.000149558
community44	esophageal carcinoma	3	27	21	13324	9.55469e-06	0.000153016
community44	lymphoid leukemia	3	27	21	13324	9.55469e-06	0.000153016
community42	lung cancer	8	31	487	13324	1.02266e-05	0.000163174
community30	colon cancer	7	40	262	13324	1.03359e-05	0.000164314
community44	colon cancer	6	27	262	13324	1.07549e-05	0.000170351
community44	skin carcinoma	3	27	22	13324	1.10434e-05	0.000174152
community24	liver cancer	7	49	214	13324	1.11142e-05	0.000174152
community1	leukemia	23	373	305	13324	1.11152e-05	0.000174152
community30	breast cancer	12	40	946	13324	1.118e-05	0.000174537
community55	B-lymphoblastic leukemia/lymphoma	3	19	32	13324	1.1776e-05	0.00018289
community44	oropharynx cancer	2	27	3	13324	1.18415e-05	0.00018289
community44	sebaceous carcinoma	2	27	3	13324	1.18415e-05	0.00018289
community44	breast carcinoma	4	27	72	13324	1.22266e-05	0.000188168
community23	liver cancer	7	50	214	13324	1.2722e-05	0.000195101
community61	lung cancer	6	16	487	13324	1.28275e-05	0.000195659
community42	osteosarcoma	6	31	233	13324	1.28486e-05	0.000195659
community9	breast cancer	22	116	946	13324	1.3244e-05	0.000200975
community60	supratentorial ependymoma	2	16	5	13324	1.34774e-05	0.000203805
community15	prostate carcinoma	4	65	31	13324	1.43362e-05	0.000216039
community44	bladder urothelial carcinoma	3	27	24	13324	1.44618e-05	0.000217135
community2	head and neck squamous cell carcinoma	13	312	136	13324	1.4509e-05	0.000217135
community24	meningioma	4	49	42	13324	1.58844e-05	0.000236901
community1	meningioma	8	373	42	13324	1.60607e-05	0.00023871
community18	malignant astrocytoma	4	58	36	13324	1.67164e-05	0.000247608
community11	lung cancer	12	77	487	13324	1.71634e-05	0.000253364
community53	hepatocellular carcinoma	8	21	818	13324	1.75796e-05	0.000258123
community28	lung cancer	9	43	487	13324	1.76047e-05	0.000258123
community2	peripheral T-cell lymphoma	7	312	37	13324	1.85494e-05	0.000271059
community9	lung non-small cell carcinoma	14	116	434	13324	1.87203e-05	0.000272638
community25	osteosarcoma	7	49	233	13324	1.91215e-05	0.000276814
community25	fibrosarcoma	4	49	44	13324	1.91346e-05	0.000276814
community1	neuroblastoma	14	373	135	13324	1.96128e-05	0.000282599
community5	hepatocellular carcinoma	30	220	818	13324	1.96647e-05	0.000282599
community8	colorectal cancer	16	145	444	13324	1.98161e-05	0.000283835
community55	lung non-small cell carcinoma	6	19	434	13324	2.04891e-05	0.000292509
community30	brain glioma	8	40	407	13324	2.0568e-05	0.000292673
community60	leukemia	5	16	305	13324	2.06895e-05	0.000293439
community44	skin squamous cell carcinoma	3	27	27	13324	2.07867e-05	0.000293858
community24	lung non-small cell carcinoma	9	49	434	13324	2.13272e-05	0.000299694
community44	medulloblastoma	4	27	83	13324	2.14256e-05	0.000299694
community44	retinoblastoma	4	27	83	13324	2.14256e-05	0.000299694
community42	breast carcinoma	4	31	72	13324	2.14758e-05	0.000299694
community33	mixed-type liposarcoma	2	37	3	13324	2.24516e-05	0.000311396
community44	chronic lymphocytic leukemia	4	27	84	13324	2.24578e-05	0.000311396
community6	colorectal cancer	17	163	444	13324	2.27932e-05	0.000314558
community72	prostate cancer	4	6	478	13324	2.28308e-05	0.000314558
community55	colorectal cancer	6	19	444	13324	2.32724e-05	0.000318407
community7	colon cancer	12	145	262	13324	2.33066e-05	0.000318407
community44	childhood osteosarcoma	2	27	4	13324	2.36385e-05	0.000318407
community44	large cell neuroendocrine carcinoma	2	27	4	13324	2.36385e-05	0.000318407
community44	MALT lymphoma	2	27	4	13324	2.36385e-05	0.000318407
community44	mucoepidermoid carcinoma	2	27	4	13324	2.36385e-05	0.000318407
community44	pancreatic intraductal papillary-colloid carcinoma	2	27	4	13324	2.36385e-05	0.000318407
community31	essential thrombocythemia	2	38	3	13324	2.36971e-05	0.000318407
community15	multiple myeloma	5	65	72	13324	2.44045e-05	0.000325943
community22	B-cell acute lymphoblastic leukemia	3	52	15	13324	2.44082e-05	0.000325943
community44	leukemia	6	27	305	13324	2.51798e-05	0.000335216
community24	colorectal cancer	9	49	444	13324	2.54268e-05	0.000337469
community30	plasmacytoma	2	40	3	13324	2.62887e-05	0.000345736
community30	neuroendocrine carcinoma	2	40	3	13324	2.62887e-05	0.000345736
community30	plasma cell neoplasm	2	40	3	13324	2.62887e-05	0.000345736
community3	nasopharynx carcinoma	9	279	77	13324	2.71916e-05	0.000355931
community18	high grade glioma	3	58	14	13324	2.72279e-05	0.000355931
community79	brain glioma	3	3	407	13324	2.82989e-05	0.00036882
community2	gastrointestinal stromal tumor	6	312	27	13324	2.85599e-05	0.00037
community2	renal carcinoma	6	312	27	13324	2.85599e-05	0.00037
community1	pituitary cancer	6	373	23	13324	2.90431e-05	0.00037514
community42	squamous cell carcinoma	4	31	78	13324	2.94141e-05	0.000378805
community34	glioblastoma	7	37	337	13324	3.01836e-05	0.000387565
community2	luminal breast carcinoma B	5	312	17	13324	3.19086e-05	0.000408505
community30	lung non-small cell carcinoma	8	40	434	13324	3.2294e-05	0.000412223
community34	ovarian cancer	7	37	341	13324	3.25047e-05	0.000413696
community15	colon cancer	8	65	262	13324	3.37816e-05	0.00042869
community30	stomach cancer	8	40	437	13324	3.38853e-05	0.000428753
community28	hepatocellular carcinoma	11	43	818	13324	3.40021e-05	0.00042898
community9	alveolar rhabdomyosarcoma	3	116	8	13324	3.45097e-05	0.000434122
community18	urinary bladder cancer	7	58	215	13324	3.47707e-05	0.000436141
community55	prostate cancer	6	19	478	13324	3.50939e-05	0.000438927
community74	acute myeloid leukemia	3	4	279	13324	3.55869e-05	0.000442727
community44	lung cancer	7	27	487	13324	3.56018e-05	0.000442727
community31	breast cancer	11	38	946	13324	3.68044e-05	0.000456375
community25	acute leukemia	4	49	52	13324	3.71371e-05	0.000459188
community2	breast carcinoma	9	312	72	13324	3.75812e-05	0.000463359
community44	renal cell carcinoma	4	27	96	13324	3.78662e-05	0.00046555
community10	mammary analogue secretory carcinoma	2	84	2	13324	3.92754e-05	0.000479394
community44	lung oat cell carcinoma	2	27	5	13324	3.93236e-05	0.000479394
community44	malignant fibrous histiocytoma	2	27	5	13324	3.93236e-05	0.000479394
community53	stomach cancer	6	21	437	13324	3.9874e-05	0.000484743
community22	breast cancer	13	52	946	13324	4.00885e-05	0.000485989
community39	breast cancer	10	32	946	13324	4.03551e-05	0.000487858
community24	angiosarcoma	3	49	19	13324	4.28551e-05	0.000516642
community15	melanoma	9	65	354	13324	4.37381e-05	0.000525826
community42	lung non-small cell carcinoma	7	31	434	13324	4.46122e-05	0.000534853
community33	uterine carcinosarcoma	2	37	4	13324	4.47851e-05	0.000535447
community77	prostate cancer	3	3	478	13324	4.58931e-05	0.000547187
community9	melanoma	12	116	354	13324	4.67736e-05	0.000556157
community8	hepatocellular carcinoma	22	145	818	13324	4.79708e-05	0.000568834
community3	retinoblastoma	9	279	83	13324	4.89622e-05	0.000579008
community18	chondrosarcoma	3	58	17	13324	5.02372e-05	0.000592471
community36	acute myeloid leukemia	6	33	279	13324	5.05906e-05	0.000594527
community30	glioblastoma	7	40	337	13324	5.06855e-05	0.000594527
community42	ovarian carcinoma	4	31	90	13324	5.14152e-05	0.000601461
community42	breast adenocarcinoma	2	31	5	13324	5.20483e-05	0.00060723
community30	childhood osteosarcoma	2	40	4	13324	5.24274e-05	0.000608382
community30	nervous system cancer	2	40	4	13324	5.24274e-05	0.000608382
community42	malignant mesothelioma	3	31	32	13324	5.32142e-05	0.000615866
community44	breast cancer	9	27	946	13324	5.57152e-05	0.000642873
community6	hepatoblastoma	4	163	18	13324	5.5844e-05	0.000642873
community3	esophageal carcinoma	5	279	21	13324	5.66949e-05	0.000650941
community30	osteosarcoma	6	40	233	13324	5.73608e-05	0.000656849
community62	hepatocellular carcinoma	6	13	818	13324	5.81364e-05	0.000663664
community3	cervical cancer	14	279	199	13324	5.82993e-05	0.000663664
community25	lymphoid leukemia	3	49	21	13324	5.84147e-05	0.000663664
community44	thyroid gland papillary carcinoma	3	27	38	13324	5.87708e-05	0.000665406
community44	biliary tract cancer	2	27	6	13324	5.88746e-05	0.000665406
community44	urinary bladder cancer	5	27	215	13324	5.94391e-05	0.000669683
community30	multiple myeloma	4	40	72	13324	5.95617e-05	0.000669683
community26	breast cancer	12	47	946	13324	6.27608e-05	0.000703829
community17	lymphoma	6	59	159	13324	6.41052e-05	0.000717053
community31	squamous cell carcinoma	4	38	78	13324	6.63586e-05	0.00074035
community30	melanoma	7	40	354	13324	6.87097e-05	0.000763635
community39	pancreatic cancer	6	32	305	13324	6.87975e-05	0.000763635
community15	diffuse gastric cancer	2	65	3	13324	6.99712e-05	0.000774681
community15	liposarcoma	3	65	17	13324	7.05924e-05	0.00077957
community11	prostate cancer	11	77	478	13324	7.12825e-05	0.000785193
community30	lung cancer	8	40	487	13324	7.16455e-05	0.000785565
community22	prostate cancer	9	52	478	13324	7.18489e-05	0.000785565
community36	thyroid gland cancer	4	33	92	13324	7.18593e-05	0.000785565
community53	lung cancer	6	21	487	13324	7.23068e-05	0.000788471
community7	colorectal cancer	15	145	444	13324	7.24906e-05	0.000788494
community2	uveal melanoma	5	312	20	13324	7.45398e-05	0.000808757
community3	clear cell renal cell carcinoma	11	279	131	13324	7.63008e-05	0.000825799
community72	colon carcinoma	2	6	31	13324	7.79025e-05	0.00083895
community42	teratocarcinoma	2	31	6	13324	7.79025e-05	0.00083895
community24	juvenile myelomonocytic leukemia	2	49	4	13324	7.89373e-05	0.000846422
community72	urinary bladder cancer	3	6	215	13324	7.89864e-05	0.000846422
community60	multiple myeloma	3	16	72	13324	7.92022e-05	0.000846644
community60	brain glioma	5	16	407	13324	8.09528e-05	0.000863231
community23	large cell neuroendocrine carcinoma	2	50	4	13324	8.22139e-05	0.000872985
community44	malignant pleural mesothelioma	2	27	7	13324	8.22698e-05	0.000872985
community42	peripheral T-cell lymphoma	3	31	37	13324	8.24873e-05	0.000873158
community72	lung adenocarcinoma	3	6	219	13324	8.34225e-05	0.00087945
community21	prostate cancer	9	53	478	13324	8.3487e-05	0.00087945
community55	ovarian cancer	5	19	341	13324	8.67379e-05	0.000911483
community30	acinar cell carcinoma	2	40	5	13324	8.71297e-05	0.00091321
community28	ovarian cancer	7	43	341	13324	8.73231e-05	0.00091321
community24	gastric adenocarcinoma	3	49	24	13324	8.79767e-05	0.000917834
community36	chronic myelomonocytic leukemia	2	33	6	13324	8.84038e-05	0.000920078
community44	cholangiocarcinoma	3	27	44	13324	9.12709e-05	0.000947107
community18	ovarian cancer	8	58	341	13324	9.15289e-05	0.000947107
community24	brain glioma	8	49	407	13324	9.16555e-05	0.000947107
community51	acute leukemia	3	23	52	13324	9.2241e-05	0.000950893
community1	head and neck cancer	7	373	40	13324	9.4678e-05	0.000973703
community15	pancreatic cancer	8	65	305	13324	9.58359e-05	0.000983281
community13	breast cancer	15	72	946	13324	9.71474e-05	0.000994386
community18	colorectal cancer	9	58	444	13324	9.76414e-05	0.000997091
community42	glioblastoma	6	31	337	13324	9.83023e-05	0.00100148
community30	lymphoma	5	40	159	13324	9.94925e-05	0.00101124
community51	adult T-cell leukemia/lymphoma	2	23	9	13324	0.000101489	0.00102912
community17	ovarian cancer	8	59	341	13324	0.000103228	0.00104211
community30	medulloblastoma	4	40	83	13324	0.000103251	0.00104211
community7	brain glioma	14	145	407	13324	0.000104199	0.00104924
community26	lung non-small cell carcinoma	8	47	434	13324	0.000105104	0.00105591
community1	uterine cancer	4	373	10	13324	0.000107271	0.00107519
community44	anaplastic astrocytoma	2	27	8	13324	0.000109487	0.00109487
community26	stomach cancer	8	47	437	13324	0.000110103	0.0010985
community18	pancreatic ductal adenocarcinoma	6	58	179	13324	0.000110757	0.00110249
community72	peripheral T-cell lymphoma	2	6	37	13324	0.000111375	0.0011061
community24	malignant peripheral nerve sheath tumor	3	49	26	13324	0.000112233	0.00111208
community2	retinoblastoma	9	312	83	13324	0.000112519	0.00111237
community25	liver cancer	6	49	214	13324	0.000113672	0.00112122
community79	medulloblastoma	2	3	83	13324	0.000114321	0.00112506
community30	B-lymphoblastic leukemia/lymphoma	3	40	32	13324	0.000114687	0.00112546
community42	liver cancer	5	31	214	13324	0.00011488	0.00112546
community10	congenital fibrosarcoma	2	84	3	13324	0.000117101	0.00114418
community72	thyroid gland papillary carcinoma	2	6	38	13324	0.000117527	0.00114418
community15	osteosarcoma	7	65	233	13324	0.000117725	0.00114418
community3	esophageal cancer	8	279	73	13324	0.000117845	0.00114418
community24	hepatocellular carcinoma	11	49	818	13324	0.000118231	0.00114448
community33	pancreatic ductal adenocarcinoma	5	37	179	13324	0.000118404	0.00114448
community5	pancreatic cancer	15	220	305	13324	0.000119553	0.00115302
community2	epithelioid sarcoma	3	312	5	13324	0.000121362	0.00116604
community60	colorectal cancer	5	16	444	13324	0.00012144	0.00116604
community28	breast cancer	11	43	946	13324	0.000122138	0.00117015
community60	chronic lymphocytic leukemia	3	16	84	13324	0.000125055	0.00119546
community24	thymoma	3	49	27	13324	0.000125825	0.00119754
community24	gastrointestinal stromal tumor	3	49	27	13324	0.000125825	0.00119754
community25	head and neck squamous cell carcinoma	5	49	136	13324	0.000126968	0.00120578
community53	adenoid cystic carcinoma	2	21	11	13324	0.000128468	0.00121736
community15	Ewing sarcoma	4	65	54	13324	0.000129616	0.00122424
community30	blastic plasmacytoid dendritic cell neoplasm	2	40	6	13324	0.000130322	0.00122424
community30	diffuse large B-cell lymphoma germinal center B-cell type	2	40	6	13324	0.000130322	0.00122424
community30	papillary carcinoma	2	40	6	13324	0.000130322	0.00122424
community24	mucosal melanoma	2	49	5	13324	0.000131098	0.00122622
community25	acute monocytic leukemia	2	49	5	13324	0.000131098	0.00122622
community13	liver cancer	7	72	214	13324	0.00013274	0.00123891
community32	pancreatic ductal adenocarcinoma	5	38	179	13324	0.000134559	0.00125319
community42	T-cell acute lymphoblastic leukemia	3	31	44	13324	0.000138539	0.00128749
community15	invasive lobular carcinoma	2	65	4	13324	0.000139281	0.00129162
community44	leiomyosarcoma	2	27	9	13324	0.000140505	0.0013002
community22	clear cell renal cell carcinoma	5	52	131	13324	0.000141389	0.00130559
community34	lung non-small cell carcinoma	7	37	434	13324	0.000143589	0.00132309
community59	lung non-small cell carcinoma	5	17	434	13324	0.000149766	0.00137709
community2	pituitary cancer	5	312	23	13324	0.000150833	0.00138236
community33	breast cancer	10	37	946	13324	0.000151238	0.00138236
community27	breast cancer	11	44	946	13324	0.000151386	0.00138236
community30	acute myeloid leukemia	6	40	279	13324	0.000151614	0.00138236
community33	myxoid liposarcoma	2	37	7	13324	0.000155515	0.00141496
community17	hepatocellular carcinoma	12	59	818	13324	0.000157123	0.0014266
community6	gastrointestinal system cancer	5	163	43	13324	0.000157552	0.00142751
community60	B-cell lymphoma	3	16	91	13324	0.00015835	0.00143175
community15	brain cancer	4	65	57	13324	0.000159673	0.00144071
community1	low grade glioma	4	373	11	13324	0.000163898	0.00147576
community44	Ewing sarcoma	3	27	54	13324	0.000167871	0.00150841
community2	papillary renal cell carcinoma	4	312	13	13324	0.000170895	0.00153108
community53	melanoma	5	21	354	13324	0.000171309	0.00153108
community18	acute myeloid leukemia	7	58	279	13324	0.000171662	0.00153108
community30	pancreatic ductal adenocarcinoma	5	40	179	13324	0.000171806	0.00153108
community36	lung adenocarcinoma	5	33	219	13324	0.000172822	0.00153698
community44	chordoma	2	27	10	13324	0.000175301	0.00155267
community44	gallbladder carcinoma	2	27	10	13324	0.000175301	0.00155267
community30	peripheral T-cell lymphoma	3	40	37	13324	0.000177175	0.00156607
community31	stomach cancer	7	38	437	13324	0.000177545	0.00156615
community59	intrahepatic cholangiocarcinoma	2	17	16	13324	0.000180992	0.00159332
community30	ocular melanoma	2	40	7	13324	0.00018193	0.00159833
community36	melanoma	6	33	354	13324	0.000182722	0.00160205
community3	acute myeloid leukemia	16	279	279	13324	0.000184046	0.00160763
community22	endometrial cancer	4	52	74	13324	0.000184202	0.00160763
community16	hepatocellular carcinoma	12	60	818	13324	0.00018447	0.00160763
community42	embryonal carcinoma	2	31	9	13324	0.000185747	0.00161305
community60	lung cancer	5	16	487	13324	0.0001862	0.00161305
community24	glioblastoma	7	49	337	13324	0.000186207	0.00161305
community6	glioblastoma	13	163	337	13324	0.000188827	0.00163249
community24	acute promyelocytic leukemia	3	49	31	13324	0.0001907	0.0016454
community30	nephroblastoma	3	40	38	13324	0.000191825	0.00165183
community26	melanoma	7	47	354	13324	0.000192573	0.00165498
community13	pancreatic cancer	8	72	305	13324	0.000193925	0.00166271
community44	colorectal cancer	6	27	444	13324	0.000194238	0.00166271
community7	lung non-small cell carcinoma	14	145	434	13324	0.000197207	0.0016848
community24	ovarian cancer	7	49	341	13324	0.000199784	0.00170346
community15	ovarian cancer	8	65	341	13324	0.000201718	0.00171658
community2	stomach carcinoma	6	312	38	13324	0.000206159	0.00175094
community25	B-lymphoblastic leukemia/lymphoma	3	49	32	13324	0.0002097	0.00177754
community8	stomach cancer	14	145	437	13324	0.000210928	0.00178446
community27	hepatocellular carcinoma	10	44	818	13324	0.000212663	0.00179564
community44	adenoid cystic carcinoma	2	27	11	13324	0.000213855	0.0017987
community44	larynx cancer	2	27	11	13324	0.000213855	0.0017987
community2	Ewing sarcoma	7	312	54	13324	0.000214956	0.00180447
community24	kidney cancer	4	49	82	13324	0.000216663	0.00181528
community72	pancreatic cancer	3	6	305	13324	0.000221799	0.00185474
community2	multiple myeloma	8	312	72	13324	0.000225111	0.00187881
community24	retinoblastoma	4	49	83	13324	0.00022686	0.00188977
community72	hematologic cancer	2	6	53	13324	0.000229335	0.00190673
community38	breast cancer	9	32	946	13324	0.000231371	0.00191886
community42	colorectal adenocarcinoma	2	31	10	13324	0.000231678	0.00191886
community10	breast secretory carcinoma	2	84	4	13324	0.00023276	0.00192415
community16	cervical cancer	6	60	199	13324	0.000234019	0.00193088
community18	clear cell renal cell carcinoma	5	58	131	13324	0.000235407	0.00193865
community24	chronic lymphocytic leukemia	4	49	84	13324	0.000237394	0.00194897
community1	liver cancer	16	373	214	13324	0.000237559	0.00194897
community30	leukemia	6	40	305	13324	0.000242903	0.00198531
community30	pancreatic cancer	6	40	305	13324	0.000242903	0.00198531
community22	colorectal cancer	8	52	444	13324	0.000248136	0.00202427
community42	head and neck squamous cell carcinoma	4	31	136	13324	0.000249699	0.0020332
community34	prostate cancer	7	37	478	13324	0.000255883	0.002074
community44	liver carcinoma	2	27	12	13324	0.000256144	0.002074
community44	thymus lymphoma	2	27	12	13324	0.000256144	0.002074
community53	kidney cancer	3	21	82	13324	0.000268476	0.00216981
community59	colon cancer	4	17	262	13324	0.000269755	0.00217292
community18	neuroblastoma	5	58	135	13324	0.000269863	0.00217292
community24	neurofibroma	2	49	7	13324	0.000273366	0.00219705
community18	diffuse large B-cell lymphoma germinal center B-cell type	2	58	6	13324	0.000274687	0.00220359
community53	medulloblastoma	3	21	83	13324	0.000278166	0.00222434
community60	Hodgkin's lymphoma	2	16	21	13324	0.000278299	0.00222434
community31	myelofibrosis	2	38	9	13324	0.000279784	0.0022321
community42	central nervous system cancer	2	31	11	13324	0.000282546	0.00225
community29	stomach cancer	7	41	437	13324	0.000286553	0.00227773
community15	renal carcinoma	3	65	27	13324	0.000289792	0.00229926
community18	pancreatic cancer	7	58	305	13324	0.000291138	0.00230573
community30	cholangiocarcinoma	3	40	44	13324	0.000296156	0.0023412
community6	melanoma	13	163	354	13324	0.000297196	0.00234147
community72	glioblastoma	3	6	337	13324	0.00029727	0.00234147
community25	lung cancer	8	49	487	13324	0.000301859	0.00237128
community44	endometrial adenocarcinoma	2	27	13	13324	0.000302147	0.00237128
community77	head and neck squamous cell carcinoma	2	3	136	13324	0.000307162	0.00240629
community72	ovarian cancer	3	6	341	13324	0.000307729	0.00240639
community30	mantle cell lymphoma	2	40	9	13324	0.000310102	0.00241281
community30	pancreatic ductal carcinoma	2	40	9	13324	0.000310102	0.00241281
community30	esophagus squamous cell carcinoma	5	40	204	13324	0.00031115	0.00241281
community2	endocrine gland cancer	4	312	15	13324	0.00031133	0.00241281
community2	non-Hodgkin lymphoma	4	312	15	13324	0.00031133	0.00241281
community31	hepatocellular carcinoma	9	38	818	13324	0.000314024	0.00242935
community17	urinary bladder cancer	6	59	215	13324	0.000320419	0.00247441
community55	Burkitt lymphoma	2	19	19	13324	0.000322368	0.00248439
community24	peripheral T-cell lymphoma	3	49	37	13324	0.000322856	0.00248439
community12	brain glioma	9	74	407	13324	0.000324952	0.00249609
community31	ovarian cancer	6	38	341	13324	0.000328512	0.00251898
community1	papillary renal cell carcinoma	4	373	13	13324	0.000335698	0.00256954
community18	squamous cell carcinoma	4	58	78	13324	0.000341072	0.00260608
community72	melanoma	3	6	354	13324	0.000343361	0.00261682
community73	colorectal cancer	3	5	444	13324	0.000343684	0.00261682
community24	stomach carcinoma	3	49	38	13324	0.000349316	0.00265505
community44	atypical teratoid rhabdoid tumor	2	27	14	13324	0.000351843	0.00265517
community44	embryonal rhabdomyosarcoma	2	27	14	13324	0.000351843	0.00265517
community44	high grade glioma	2	27	14	13324	0.000351843	0.00265517
community53	ovarian carcinoma	3	21	90	13324	0.000352294	0.00265517
community2	nasopharynx carcinoma	8	312	77	13324	0.000352391	0.00265517
community77	breast cancer	3	3	946	13324	0.000356853	0.00268413
community25	childhood acute myeloid leukemia	2	49	8	13324	0.000363201	0.00272229
community53	B-cell lymphoma	3	21	91	13324	0.000363809	0.00272229
community53	diffuse large B-cell lymphoma	3	21	91	13324	0.000363809	0.00272229
community1	lymphoma	13	373	159	13324	0.000379777	0.00283689
community2	squamous cell carcinoma	8	312	78	13324	0.000383653	0.00286092
community7	ovarian carcinoma	6	145	90	13324	0.000385166	0.00286661
community30	liver cancer	5	40	214	13324	0.000385738	0.00286661
community42	stomach cancer	6	31	437	13324	0.000389167	0.00288432
community1	malignant astrocytoma	6	373	36	13324	0.00038945	0.00288432
community44	multiple myeloma	3	27	72	13324	0.00039069	0.00288858
community24	breast cancer	11	49	946	13324	0.000399206	0.00294652
community13	ovarian cancer	8	72	341	13324	0.000400308	0.00294964
community44	non-Hodgkin lymphoma	2	27	15	13324	0.00040521	0.0029807
community15	esophagus squamous cell carcinoma	6	65	204	13324	0.000407908	0.00299547
community18	kidney cancer	4	58	82	13324	0.000411439	0.00301629
community81	lymphoma	2	3	159	13324	0.000419556	0.00307061
community72	multiple myeloma	2	6	72	13324	0.000422953	0.00309026
community53	renal cell carcinoma	3	21	96	13324	0.000424977	0.00309582
community31	adenoid cystic carcinoma	2	38	11	13324	0.00042514	0.00309582
community73	prostate cancer	3	5	478	13324	0.000426784	0.00310258
community18	medulloblastoma	4	58	83	13324	0.000430508	0.00312442
community30	ovarian cancer	6	40	341	13324	0.000434011	0.00314459
community72	esophageal cancer	2	6	73	13324	0.000434736	0.00314459
community25	skin cancer	3	49	41	13324	0.000436837	0.00315093
community8	liver cancer	9	145	214	13324	0.000437065	0.00315093
community31	hematologic cancer	3	38	53	13324	0.000439486	0.00316313
community72	diffuse midline glioma, H3 K27M-mutant	1	6	1	13324	0.000450315	0.00323571
community60	clear cell renal cell carcinoma	3	16	131	13324	0.000458827	0.00329142
community44	bladder carcinoma	2	27	16	13324	0.000462227	0.00329945
community44	gallbladder cancer	2	27	16	13324	0.000462227	0.00329945
community44	intrahepatic cholangiocarcinoma	2	27	16	13324	0.000462227	0.00329945
community25	tongue squamous cell carcinoma	2	49	9	13324	0.000465325	0.00331611
community18	stomach cancer	8	58	437	13324	0.000467568	0.00332663
community30	nasal type extranodal NK/T-cell lymphoma	2	40	11	13324	0.000471066	0.00334603
community44	nasopharynx carcinoma	3	27	77	13324	0.000474867	0.00336752
community23	parathyroid carcinoma	2	50	9	13324	0.000484458	0.00342993
community61	breast cancer	6	16	946	13324	0.000486022	0.0034354
community6	colon carcinoma	4	163	31	13324	0.000491112	0.00346573
community73	renal cell carcinoma	2	5	96	13324	0.000502958	0.00353881
community51	brain glioma	5	23	407	13324	0.000503098	0.00353881
community11	pancreatic ductal adenocarcinoma	6	77	179	13324	0.000505486	0.00354768
community3	lung adenocarcinoma	13	279	219	13324	0.000507628	0.00354768
community12	lung non-small cell carcinoma	9	74	434	13324	0.000508258	0.00354768
community18	anaplastic astrocytoma	2	58	8	13324	0.000508447	0.00354768
community18	laryngeal carcinoma	2	58	8	13324	0.000508447	0.00354768
community30	hematologic cancer	3	40	53	13324	0.000510847	0.0035562
community61	head and neck squamous cell carcinoma	3	16	136	13324	0.000511306	0.0035562
community72	brain glioma	3	6	407	13324	0.000516025	0.00358328
community6	prostate cancer	15	163	478	13324	0.000522458	0.00361925
community44	chondrosarcoma	2	27	17	13324	0.000522873	0.00361925
community17	childhood acute myeloid leukemia	2	59	8	13324	0.000526049	0.00363543
community12	stomach cancer	9	74	437	13324	0.000532933	0.00367279
community55	acute myeloid leukemia	4	19	279	13324	0.000533463	0.00367279
community15	urinary bladder cancer	6	65	215	13324	0.000533993	0.00367279
community5	melanoma	15	220	354	13324	0.00053834	0.00369683
community30	acute lymphoblastic leukemia	3	40	54	13324	0.000539389	0.00369818
community2	collecting duct carcinoma	2	312	2	13324	0.000546611	0.00374179
community25	brain glioma	7	49	407	13324	0.000561979	0.00384093
community30	thymus lymphoma	2	40	12	13324	0.000563666	0.0038464
community7	neuroblastoma	7	145	135	13324	0.000566681	0.0038609
community6	intestinal cancer	3	163	14	13324	0.000572895	0.00389712
community16	stomach cancer	8	60	437	13324	0.000584414	0.00396196
community71	melanoma	3	7	354	13324	0.000585046	0.00396196
community15	lung adenocarcinoma	6	65	219	13324	0.000586537	0.00396196
community44	hepatoblastoma	2	27	18	13324	0.000587127	0.00396196
community44	basal cell carcinoma	2	27	18	13324	0.000587127	0.00396196
community42	multiple myeloma	3	31	72	13324	0.000588027	0.00396196
community8	lung cancer	14	145	487	13324	0.000588816	0.00396196
community6	hepatocellular carcinoma	21	163	818	13324	0.000598301	0.00401955
community12	melanoma	8	74	354	13324	0.000606621	0.00406914
community72	lung non-small cell carcinoma	3	6	434	13324	0.000622057	0.00416625
community53	colon cancer	4	21	262	13324	0.000627251	0.00419225
community13	clear cell renal cell carcinoma	5	72	131	13324	0.000628877	0.00419225
community13	acute myeloid leukemia	7	72	279	13324	0.000629204	0.00419225
community55	hepatocellular carcinoma	6	19	818	13324	0.00063004	0.00419225
community30	brain cancer	3	40	57	13324	0.000630981	0.00419225
community2	acute promyelocytic leukemia	5	312	31	13324	0.00063182	0.00419225
community2	small cell carcinoma	3	312	8	13324	0.000633413	0.00419225
community23	brain glioma	7	50	407	13324	0.000633774	0.00419225
community72	stomach cancer	3	6	437	13324	0.000634633	0.00419225
community15	alveolar rhabdomyosarcoma	2	65	8	13324	0.000637765	0.00420654
community16	colorectal cancer	8	60	444	13324	0.000645777	0.00425292
community6	stomach cancer	14	163	437	13324	0.000649243	0.00426124
community64	lung cancer	4	12	487	13324	0.000649613	0.00426124
community2	basal cell carcinoma	4	312	18	13324	0.00065058	0.00426124
community18	oligodendroglioma	2	58	9	13324	0.000650968	0.00426124
community3	transitional cell carcinoma	4	279	20	13324	0.000653046	0.00426171
community44	adrenal gland pheochromocytoma	2	27	19	13324	0.000654968	0.00426171
community44	laryngeal squamous cell carcinoma	2	27	19	13324	0.000654968	0.00426171
community45	rhabdoid cancer	2	27	19	13324	0.000654968	0.00426171
community15	retinoblastoma	4	65	83	13324	0.000658858	0.0042806
community34	colon cancer	5	37	262	13324	0.000661105	0.00428878
community72	colorectal cancer	3	6	444	13324	0.00066461	0.00430509
community72	B-cell lymphoma	2	6	91	13324	0.000673741	0.00435124
community72	diffuse large B-cell lymphoma	2	6	91	13324	0.000673741	0.00435124
community53	prostate adenocarcinoma	2	21	25	13324	0.000686856	0.00442935
community72	thyroid gland cancer	2	6	92	13324	0.000688504	0.00443339
community42	liposarcoma	2	31	17	13324	0.000689575	0.00443371
community8	juvenile myelomonocytic leukemia	2	145	4	13324	0.00069067	0.00443418
community1	breast carcinoma	8	373	72	13324	0.000705299	0.00452141
community34	breast cancer	9	37	946	13324	0.000711975	0.00455748
community25	pancreatic cancer	6	49	305	13324	0.000720942	0.00460808
community44	colon adenocarcinoma	2	27	20	13324	0.000726375	0.00463598
community13	nasopharynx carcinoma	4	72	77	13324	0.000729249	0.00464749
community39	prostate cancer	6	32	478	13324	0.000732739	0.00466288
community44	ovarian carcinoma	3	27	90	13324	0.000744867	0.00473312
community5	lung adenocarcinoma	11	220	219	13324	0.000757333	0.0048053
community17	melanoma	7	59	354	13324	0.000760105	0.00481585
community79	urinary bladder cancer	2	3	215	13324	0.000765133	0.00484064
community30	atypical teratoid rhabdoid tumor	2	40	14	13324	0.000772745	0.00487458
community30	embryonal rhabdomyosarcoma	2	40	14	13324	0.000772745	0.00487458
community42	basal cell carcinoma	2	31	18	13324	0.000774081	0.00487592
community1	gastroesophageal cancer	2	373	2	13324	0.000781655	0.00489541
community1	lung large cell carcinoma	2	373	2	13324	0.000781655	0.00489541
community1	spinal cord ependymoma	2	373	2	13324	0.000781655	0.00489541
community7	osteosarcoma	9	145	233	13324	0.000781686	0.00489541
community1	bladder carcinoma	4	373	16	13324	0.000785387	0.00490828
community24	esophagus squamous cell carcinoma	5	49	204	13324	0.000787135	0.00490828
community25	esophagus squamous cell carcinoma	5	49	204	13324	0.000787135	0.00490828
community44	thyroid gland cancer	3	27	92	13324	0.000793339	0.00493623
community15	nephroblastoma	3	65	38	13324	0.000793892	0.00493623
community45	rhabdomyosarcoma	2	27	21	13324	0.000801327	0.00497534
community2	myeloproliferative neoplasm	4	312	19	13324	0.000804993	0.00499096
community13	prostate cancer	9	72	478	13324	0.000809016	0.00500874
community45	hepatocellular carcinoma	7	27	818	13324	0.000810219	0.00500905
community3	melanoma	17	279	354	13324	0.000811504	0.00500985
community15	acute megakaryocytic leukemia	2	65	9	13324	0.000816104	0.0050311
community7	glioblastoma	11	145	337	13324	0.000827963	0.00509696
community1	brain cancer	7	373	57	13324	0.00083476	0.00513153
community57	neuroblastoma	3	19	135	13324	0.000840561	0.00515775
community24	stomach cancer	7	49	437	13324	0.000841402	0.00515775
community54	hepatocellular carcinoma	6	20	818	13324	0.000845127	0.00517327
community42	adrenal gland pheochromocytoma	2	31	19	13324	0.000863264	0.00526943
community42	Burkitt lymphoma	2	31	19	13324	0.000863264	0.00526943
community16	sporadic breast cancer	2	60	10	13324	0.000866594	0.00528233
community72	lung cancer	3	6	487	13324	0.000868775	0.0052882
community7	hepatoblastoma	3	145	18	13324	0.000877199	0.00533199
community30	oral squamous cell carcinoma	3	40	64	13324	0.000881071	0.00534804
community42	medulloblastoma	3	31	83	13324	0.000885068	0.0053592
community15	ovarian carcinoma	4	65	90	13324	0.000886989	0.0053592
community20	low grade glioma	2	55	11	13324	0.000887762	0.0053592
community30	B-cell acute lymphoblastic leukemia	2	40	15	13324	0.000889084	0.0053592
community30	non-Hodgkin lymphoma	2	40	15	13324	0.000889084	0.0053592
community72	familial medullary thyroid carcinoma	1	6	2	13324	0.000900292	0.00541376
community64	malignant olfactory nerve neoplasm	1	12	1	13324	0.00090063	0.00541376
community16	gastrointestinal system cancer	3	60	43	13324	0.000902347	0.00541658
community42	chronic lymphocytic leukemia	3	31	84	13324	0.000915908	0.00548618
community17	prostate cancer	8	59	478	13324	0.00091647	0.00548618
community25	hematologic cancer	3	49	53	13324	0.000920818	0.00550461
community6	pancreatic cancer	11	163	305	13324	0.000953529	0.00569232
community2	ovarian carcinoma	8	312	90	13324	0.000959823	0.00572202
community44	pituitary cancer	2	27	23	13324	0.000961783	0.00572584
community2	endometrial carcinoma	5	312	34	13324	0.000964653	0.00573506
community25	Ewing sarcoma	3	49	54	13324	0.000971604	0.00576848
community54	neuroblastoma	3	20	135	13324	0.000979085	0.00580496
community2	colon adenocarcinoma	4	312	20	13324	0.000982948	0.00581991
community15	skin cancer	3	65	41	13324	0.000989208	0.005849
community10	multiple myeloma	4	84	72	13324	0.00100296	0.00592226
community3	brain cancer	6	279	57	13324	0.00100683	0.005937
community6	brain glioma	13	163	407	13324	0.00101199	0.00595933
community15	anaplastic large cell lymphoma	2	65	10	13324	0.0010153	0.00597075
community22	esophagus squamous cell carcinoma	5	52	204	13324	0.00102528	0.00602129
community35	angiosarcoma	2	34	19	13324	0.00103749	0.00608477
community7	lung small cell carcinoma	5	145	73	13324	0.00104124	0.0060985
community42	lymphoid leukemia	2	31	21	13324	0.00105553	0.00617387
community15	meningioma	3	65	42	13324	0.00106033	0.0061896
community12	medulloblastoma	4	74	83	13324	0.00106107	0.0061896
community55	pancreatic carcinoma	2	19	35	13324	0.00109897	0.00639213
community2	pancreatic carcinoma	5	312	35	13324	0.00109943	0.00639213
community2	thyroid gland cancer	8	312	92	13324	0.00110021	0.00639213
community19	brain glioma	7	55	407	13324	0.00110491	0.00641084
community3	chronic myeloid leukemia	4	279	23	13324	0.00112105	0.00649577
community60	pancreatic ductal adenocarcinoma	3	16	179	13324	0.00112332	0.00650027
community80	T-cell large granular lymphocyte leukemia	1	3	5	13324	0.00112511	0.00650198
community9	Ewing sarcoma	4	116	54	13324	0.00113014	0.00652232
community6	lung adenocarcinoma	9	163	219	13324	0.00113234	0.00652639
community24	brain cancer	3	49	57	13324	0.00113427	0.00652868
community44	prostate adenocarcinoma	2	27	25	13324	0.00113617	0.00652868
community7	malignant fibrous histiocytoma	2	145	5	13324	0.00113876	0.00652868
community7	supratentorial ependymoma	2	145	5	13324	0.00113876	0.00652868
community30	luminal breast carcinoma B	2	40	17	13324	0.00114501	0.00654721
community59	head and neck cancer	2	17	40	13324	0.00114501	0.00654721
community42	B-cell lymphoma	3	31	91	13324	0.00115058	0.00657042
community24	embryonal rhabdomyosarcoma	2	49	14	13324	0.00115562	0.00658189
community24	high grade glioma	2	49	14	13324	0.00115562	0.00658189
community1	squamous cell carcinoma	8	373	78	13324	0.00116844	0.0066462
community42	thyroid gland cancer	3	31	92	13324	0.00118685	0.00674204
community74	monocytic leukemia	1	4	4	13324	0.00120003	0.006786
community60	anaplastic pleomorphic xanthoastrocytoma	1	16	1	13324	0.00120084	0.006786
community60	liver lymphoma	1	16	1	13324	0.00120084	0.006786
community60	spitzoid melanoma	1	16	1	13324	0.00120084	0.006786
community60	fibrosarcoma	2	16	44	13324	0.00122365	0.00689694
community60	T-cell acute lymphoblastic leukemia	2	16	44	13324	0.00122365	0.00689694
community30	breast carcinoma	3	40	72	13324	0.00123332	0.00694244
community15	invasive ductal carcinoma	2	65	11	13324	0.00123505	0.00694318
community6	pancreatic ductal adenocarcinoma	8	163	179	13324	0.00125549	0.00704471
community25	ovarian cancer	6	49	341	13324	0.00125636	0.00704471
community3	rectum cancer	3	279	11	13324	0.00126778	0.00709162
community53	endometrial carcinoma	2	21	34	13324	0.001268	0.00709162
community30	lung small cell carcinoma	3	40	73	13324	0.00128259	0.00716401
community30	hepatoblastoma	2	40	18	13324	0.00128446	0.00716522
community13	ovarian carcinoma	4	72	90	13324	0.00128779	0.0071665
community31	nasopharynx carcinoma	3	38	77	13324	0.00128799	0.0071665
community31	myeloproliferative neoplasm	2	38	19	13324	0.00129346	0.00717818
community32	Burkitt lymphoma	2	38	19	13324	0.00129346	0.00717818
community2	chordoma	3	312	10	13324	0.00129505	0.00717818
community22	thyroid gland follicular carcinoma	2	52	14	13324	0.00129949	0.00719362
community23	glioblastoma	6	50	337	13324	0.00131357	0.00726226
community25	B-cell acute lymphoblastic leukemia	2	49	15	13324	0.0013287	0.00733659
community15	hepatocellular carcinoma	11	65	818	13324	0.00133077	0.00733868
community30	endometrial cancer	3	40	74	13324	0.00133305	0.00734192
community8	pancreatic cancer	10	145	305	13324	0.00134603	0.007404
community25	neuroblastoma	4	49	135	13324	0.00136812	0.00751573
community58	brain glioma	4	17	407	13324	0.0013698	0.00751573
community23	ovarian cancer	6	50	341	13324	0.00139165	0.00762599
community36	breast cancer	8	33	946	13324	0.00140207	0.00767339
community24	head and neck squamous cell carcinoma	4	49	136	13324	0.00140477	0.00767848
community2	lung carcinoma	5	312	37	13324	0.00140883	0.00769097
community3	medulloblastoma	7	279	83	13324	0.00141154	0.00769609
community9	cervical cancer	7	116	199	13324	0.00141979	0.00773133
community44	myelodysplastic syndrome	2	27	28	13324	0.00142352	0.00774193
community30	adrenal gland pheochromocytoma	2	40	19	13324	0.00143147	0.00775602
community30	Burkitt lymphoma	2	40	19	13324	0.00143147	0.00775602
community30	laryngeal squamous cell carcinoma	2	40	19	13324	0.00143147	0.00775602
community14	renal cell carcinoma	4	70	96	13324	0.00146701	0.00793866
community34	retinoblastoma	3	37	83	13324	0.00147549	0.00797462
community14	lung non-small cell carcinoma	8	70	434	13324	0.00148943	0.00802657
community72	head and neck squamous cell carcinoma	2	6	136	13324	0.00148992	0.00802657
community18	hematologic cancer	3	58	53	13324	0.00149065	0.00802657
community42	prostate adenocarcinoma	2	31	25	13324	0.0014948	0.00803892
community75	breast adenocarcinoma	1	4	5	13324	0.0014997	0.00804717
community66	Merkel cell carcinoma	1	10	2	13324	0.00150004	0.00804717
community23	head and neck squamous cell carcinoma	4	50	136	13324	0.00151174	0.00809751
community24	intrahepatic cholangiocarcinoma	2	49	16	13324	0.00151315	0.00809751
community23	osteosarcoma	5	50	233	13324	0.00152491	0.00815039
community14	glioblastoma	7	70	337	13324	0.00153102	0.00815452
community80	leukemia	2	3	305	13324	0.00153132	0.00815452
community76	pancreatic cancer	2	3	305	13324	0.00153132	0.00815452
community12	osteosarcoma	6	74	233	13324	0.00153958	0.00818845
community1	oligodendroglioma	3	373	9	13324	0.00154413	0.00819352
community51	leukemia	4	23	305	13324	0.00154431	0.00819352
community35	thyroid gland cancer	3	34	92	13324	0.00154847	0.00820558
community33	prostate cancer	6	37	478	13324	0.00156887	0.00830356
community79	germ cell cancer	1	3	7	13324	0.00157468	0.00832415
community3	neuroblastoma	9	279	135	13324	0.00159155	0.00840306
community12	adenoid cystic carcinoma	2	74	11	13324	0.00159401	0.00840586
community2	uterine corpus sarcoma	2	312	3	13324	0.00160167	0.008436
community31	chronic lymphocytic leukemia	3	38	84	13324	0.00164692	0.00866381
community30	lung squamous cell carcinoma	3	40	80	13324	0.00166143	0.00872956
community11	hepatocellular carcinoma	12	77	818	13324	0.00166768	0.00875019
community23	melanoma	6	50	354	13324	0.00166939	0.00875019
community8	colon cancer	9	145	262	13324	0.0016884	0.00883914
community22	ovarian cancer	6	52	341	13324	0.00169407	0.00885815
community24	liposarcoma	2	49	17	13324	0.00170885	0.00890325
community24	neuroendocrine tumor	2	49	17	13324	0.00170885	0.00890325
community25	luminal breast carcinoma B	2	49	17	13324	0.00170885	0.00890325
community2	nasal type extranodal NK/T-cell lymphoma	3	312	11	13324	0.00173936	0.00903972
community44	acute promyelocytic leukemia	2	27	31	13324	0.00174129	0.00903972
community44	prostate carcinoma	2	27	31	13324	0.00174129	0.00903972
community50	salivary gland adenoid cystic carcinoma	1	24	1	13324	0.00180126	0.00933987
community53	skin cancer	2	21	41	13324	0.00183492	0.00950307
community7	urinary bladder cancer	8	145	215	13324	0.00185858	0.00961409
community41	hepatocellular carcinoma	7	31	818	13324	0.0018652	0.00962691
community79	glioblastoma	2	3	337	13324	0.00186549	0.00962691
community11	breast cancer	13	77	946	13324	0.00187198	0.00964351
community8	lung non-small cell carcinoma	12	145	434	13324	0.00187315	0.00964351
community12	liver carcinoma	2	74	12	13324	0.00190247	0.00978285
community16	esophagus squamous cell carcinoma	5	60	204	13324	0.00190921	0.00980591
community26	colon cancer	5	47	262	13324	0.00191355	0.00981657
community30	testicular germ cell cancer	2	40	22	13324	0.00191722	0.00982107
community71	clear cell renal cell carcinoma	2	7	131	13324	0.00191895	0.00982107
community60	prostate cancer	4	16	478	13324	0.00192779	0.00985467
community59	esophagus squamous cell carcinoma	3	17	204	13324	0.00194399	0.00992576
community46	fibrolamellar carcinoma	1	26	1	13324	0.00195137	0.00995174
community33	bladder urothelial carcinoma	2	37	24	13324	0.00195444	0.00995571
community60	lung adenocarcinoma	3	16	219	13324	0.00198337	0.00998258
community59	colorectal carcinoma	2	17	53	13324	0.00199334	0.00998258
community15	high grade glioma	2	65	14	13324	0.00201458	0.00998258
community78	leiomyosarcoma	1	3	9	13324	0.00202399	0.00998258
community44	glomangiosarcoma	1	27	1	13324	0.00202642	0.00998258
community44	keratoacanthoma	1	27	1	13324	0.00202642	0.00998258
community44	adrenal gland cancer	1	27	1	13324	0.00202642	0.00998258
community44	appendix adenocarcinoma	1	27	1	13324	0.00202642	0.00998258
community44	atypical neurofibroma	1	27	1	13324	0.00202642	0.00998258
community44	bladder squamous cell carcinoma	1	27	1	13324	0.00202642	0.00998258
community44	brain stem glioma	1	27	1	13324	0.00202642	0.00998258
community44	choroid plexus cancer	1	27	1	13324	0.00202642	0.00998258
community44	chromophobe renal cell carcinoma	1	27	1	13324	0.00202642	0.00998258
community44	conjunctival cancer	1	27	1	13324	0.00202642	0.00998258
community44	endometrial squamous cell carcinoma	1	27	1	13324	0.00202642	0.00998258
community44	high grade ependymoma	1	27	1	13324	0.00202642	0.00998258
community44	lip cancer	1	27	1	13324	0.00202642	0.00998258
community44	liver angiosarcoma	1	27	1	13324	0.00202642	0.00998258
community44	malignant ovarian germ cell neoplasm	1	27	1	13324	0.00202642	0.00998258
community44	myxoid chondrosarcoma	1	27	1	13324	0.00202642	0.00998258
community44	nodular malignant melanoma	1	27	1	13324	0.00202642	0.00998258
community44	oral cavity cancer	1	27	1	13324	0.00202642	0.00998258
community44	ovary serous adenocarcinoma	1	27	1	13324	0.00202642	0.00998258
community44	penis carcinoma	1	27	1	13324	0.00202642	0.00998258
community44	pineal gland cancer	1	27	1	13324	0.00202642	0.00998258
community44	posterior uveal melanoma	1	27	1	13324	0.00202642	0.00998258
community44	tonsil cancer	1	27	1	13324	0.00202642	0.00998258
community44	uterine corpus cancer	1	27	1	13324	0.00202642	0.00998258
community44	vulva cancer	1	27	1	13324	0.00202642	0.00998258
community79	melanoma	2	3	354	13324	0.00205605	0.0101171
community50	nephroblastoma	2	24	38	13324	0.0020596	0.0101196
community31	B-cell lymphoma	3	38	91	13324	0.00206123	0.0101196
community9	brain glioma	10	116	407	13324	0.00206554	0.0101293
community44	endometrial carcinoma	2	27	34	13324	0.00208895	0.0102326
community30	chronic myeloid leukemia	2	40	23	13324	0.00209381	0.0102448
community16	breast cancer	11	60	946	13324	0.002102	0.0102733
community36	myelodysplastic syndrome	2	33	28	13324	0.00211635	0.0103318
community24	myeloproliferative neoplasm	2	49	19	13324	0.00213348	0.0104037
community22	lung cancer	7	52	487	13324	0.00213748	0.0104115
community44	clear cell renal cell carcinoma	3	27	131	13324	0.00215476	0.0104722
community45	clear cell renal cell carcinoma	3	27	131	13324	0.00215476	0.0104722
community25	breast carcinoma	3	49	72	13324	0.00219453	0.0106535
community2	skin cancer	5	312	41	13324	0.00220584	0.0106965
community23	rhabdoid cancer	2	50	19	13324	0.00221952	0.0107508
community39	hepatocellular carcinoma	7	32	818	13324	0.0022418	0.0108345
community40	hepatocellular carcinoma	7	32	818	13324	0.0022418	0.0108345
community77	chordoma	1	3	10	13324	0.00224854	0.010842
community66	choroid plexus carcinoma	1	10	3	13324	0.00224854	0.010842
community59	urinary bladder cancer	3	17	215	13324	0.00225084	0.010842
community1	desmoplastic small round cell tumor	2	373	3	13324	0.00227966	0.0108861
community1	endometrioid ovary carcinoma	2	373	3	13324	0.00227966	0.0108861
community1	peripheral nerve sheath neoplasm	2	373	3	13324	0.00227966	0.0108861
community24	lung small cell carcinoma	3	49	73	13324	0.00228064	0.0108861
community25	esophageal cancer	3	49	73	13324	0.00228064	0.0108861
community53	breast cancer	6	21	946	13324	0.00228324	0.0108861
community40	brain glioma	5	32	407	13324	0.002284	0.0108861
community42	acute promyelocytic leukemia	2	31	31	13324	0.00228678	0.0108861
community42	prostate carcinoma	2	31	31	13324	0.00228678	0.0108861
community24	colon cancer	5	49	262	13324	0.00228759	0.0108861
community25	colon cancer	5	49	262	13324	0.00228759	0.0108861
community23	breast carcinoma	3	50	72	13324	0.00232248	0.01104
community42	mammary Paget's disease	1	31	1	13324	0.00232663	0.0110477
community24	uveal melanoma	2	49	20	13324	0.00236216	0.0112041
community24	endometrial cancer	3	49	74	13324	0.00236875	0.0112231
community21	lung cancer	7	53	487	13324	0.00237368	0.0112342
community18	neuroendocrine tumor	2	58	17	13324	0.00237766	0.0112377
community65	retinoblastoma	2	12	83	13324	0.0023807	0.0112377
community30	diffuse large B-cell lymphoma	3	40	91	13324	0.00238218	0.0112377
community55	acute leukemia	2	19	52	13324	0.00239637	0.0112924
community60	plasmablastic lymphoma	1	16	2	13324	0.00239898	0.0112924
community39	hereditary renal cell carcinoma	1	32	1	13324	0.00240168	0.0112928
community10	leukemia	7	84	305	13324	0.00242803	0.0114044
community44	peripheral T-cell lymphoma	2	27	37	13324	0.00246596	0.0115699
community30	prostate adenocarcinoma	2	40	25	13324	0.00246861	0.0115699
community78	central nervous system cancer	1	3	11	13324	0.00247302	0.0115781
community53	pancreatic ductal adenocarcinoma	3	21	179	13324	0.00249605	0.0116733
community6	chronic myeloid leukemia	3	163	23	13324	0.00249981	0.0116783
community59	hepatocellular carcinoma	5	17	818	13324	0.0025048	0.011689
community54	brain glioma	4	20	407	13324	0.00254275	0.0118534
community35	Sertoli-Leydig cell tumor	1	34	1	13324	0.00255179	0.0118646
community29	diffuse large B-cell lymphoma	3	41	91	13324	0.00255322	0.0118646
community5	glioblastoma	13	220	337	13324	0.00255336	0.0118646
community33	urinary bladder cancer	4	37	215	13324	0.00257006	0.0119209
community18	head and neck squamous cell carcinoma	4	58	136	13324	0.00257096	0.0119209
community55	acute lymphoblastic leukemia	2	19	54	13324	0.00257951	0.0119478
community31	thymoma	2	38	27	13324	0.00259806	0.0119988
community24	rhabdomyosarcoma	2	49	21	13324	0.00260158	0.0119988
community24	Hodgkin's lymphoma	2	49	21	13324	0.00260158	0.0119988
community24	thyroid gland carcinoma	2	49	21	13324	0.00260158	0.0119988
community17	colorectal cancer	7	59	444	13324	0.00261365	0.0120416
community29	thyroid gland cancer	3	41	92	13324	0.00263171	0.0121032
community19	prostate cancer	7	55	478	13324	0.00263277	0.0121032
community50	lymphoma	3	24	159	13324	0.00263537	0.0121032
community11	lung non-small cell carcinoma	8	77	434	13324	0.00264109	0.0121166
community30	cervix carcinoma	2	40	26	13324	0.00266669	0.0122211
community65	seminoma	1	12	3	13324	0.00269743	0.012349
community42	colon cancer	4	31	262	13324	0.00271094	0.0123978
community11	ovarian cancer	7	77	341	13324	0.00273816	0.0124951
community34	lung adenocarcinoma	4	37	219	13324	0.00274038	0.0124951
community42	endometrial carcinoma	2	31	34	13324	0.00274087	0.0124951
community1	ovarian carcinoma	8	373	90	13324	0.00276203	0.0125784
community6	kidney cancer	5	163	82	13324	0.00279839	0.0127306
community31	urinary bladder cancer	4	38	215	13324	0.00282681	0.0128439
community28	ovarian carcinoma	3	43	90	13324	0.0028292	0.0128439
community24	testicular germ cell cancer	2	49	22	13324	0.00285163	0.0129201
community31	acute basophilic leukemia	1	38	1	13324	0.002852	0.0129201
community54	acute lymphoblastic leukemia	2	20	54	13324	0.00285492	0.0129201
community7	ovarian cancer	10	145	341	13324	0.00286622	0.0129577
community18	osteosarcoma	5	58	233	13324	0.00287089	0.0129653
community42	pancreatic carcinoma	2	31	35	13324	0.00290064	0.0130829
community19	lung cancer	7	55	487	13324	0.00290295	0.0130829
community24	lung squamous cell carcinoma	3	49	80	13324	0.00294023	0.013121
community9	hepatocellular carcinoma	15	116	818	13324	0.00294127	0.013121
community15	leukemia	6	65	305	13324	0.00295705	0.013121
community23	skin carcinoma	2	50	22	13324	0.00296597	0.013121
community2	fibrosarcoma	5	312	44	13324	0.00298006	0.013121
community7	head and neck squamous cell carcinoma	6	145	136	13324	0.00298862	0.013121
community6	leukemia	10	163	305	13324	0.00299013	0.013121
community30	HCL-V	1	40	1	13324	0.0030021	0.013121
community30	medullomyoblastoma	1	40	1	13324	0.0030021	0.013121
community30	Barrett's adenocarcinoma	1	40	1	13324	0.0030021	0.013121
community30	B-cell prolymphocytic leukemia	1	40	1	13324	0.0030021	0.013121
community30	bone lymphoma	1	40	1	13324	0.0030021	0.013121
community30	bone marrow cancer	1	40	1	13324	0.0030021	0.013121
community30	cerebral primitive neuroectodermal tumor	1	40	1	13324	0.0030021	0.013121
community30	chronic leukemia	1	40	1	13324	0.0030021	0.013121
community30	composite lymphoma	1	40	1	13324	0.0030021	0.013121
community30	dedifferentiated chondrosarcoma	1	40	1	13324	0.0030021	0.013121
community30	fibrous meningioma	1	40	1	13324	0.0030021	0.013121
community30	heart cancer	1	40	1	13324	0.0030021	0.013121
community30	Hodgkin's lymphoma, nodular sclerosis	1	40	1	13324	0.0030021	0.013121
community30	intracranial meningioma	1	40	1	13324	0.0030021	0.013121
community30	lung giant cell carcinoma	1	40	1	13324	0.0030021	0.013121
community30	lung papillary adenocarcinoma	1	40	1	13324	0.0030021	0.013121
community30	maxillary sinus squamous cell carcinoma	1	40	1	13324	0.0030021	0.013121
community30	mediastinal malignant lymphoma	1	40	1	13324	0.0030021	0.013121
community30	meningothelial meningioma	1	40	1	13324	0.0030021	0.013121
community30	ovarian mucinous neoplasm	1	40	1	13324	0.0030021	0.013121
community30	pituitary carcinoma	1	40	1	13324	0.0030021	0.013121
community30	Richter's syndrome	1	40	1	13324	0.0030021	0.013121
community30	uterus leiomyosarcoma	1	40	1	13324	0.0030021	0.013121
community11	colorectal cancer	8	77	444	13324	0.0030078	0.0131326
community32	lung adenocarcinoma	4	38	219	13324	0.00301322	0.0131431
community2	skin squamous cell carcinoma	4	312	27	13324	0.00302197	0.013168
community53	brain glioma	4	21	407	13324	0.0030459	0.013259
community39	stomach cancer	5	32	437	13324	0.00306603	0.0133332
community29	embryonal testis carcinoma	1	41	1	13324	0.00307715	0.0133548
community29	interdigitating dendritic cell sarcoma	1	41	1	13324	0.00307715	0.0133548
community73	breast cancer	3	5	946	13324	0.00308116	0.0133589
community8	cervical squamous cell carcinoma	2	145	8	13324	0.00308692	0.0133705
community3	pancreatic ductal adenocarcinoma	10	279	179	13324	0.0030916	0.0133774
community77	stomach cancer	2	3	437	13324	0.00311483	0.0134645
community2	alveolar soft part sarcoma	2	312	4	13324	0.0031288	0.013498
community2	superficial urinary bladder cancer	2	312	4	13324	0.0031288	0.013498
community72	cervical cancer	2	6	199	13324	0.00313682	0.0135192
community72	neurofibroma	1	6	7	13324	0.00314511	0.0135382
community53	thymic carcinoma	1	21	2	13324	0.00314747	0.0135382
community13	bladder carcinoma	2	72	16	13324	0.00320987	0.0137929
community28	aggressive NK-cell leukemia	1	43	1	13324	0.00322726	0.0138402
community28	pleomorphic liposarcoma	1	43	1	13324	0.00322726	0.0138402
community42	lung carcinoma	2	31	37	13324	0.00323261	0.0138495
community24	medulloblastoma	3	49	83	13324	0.00325396	0.0139272
community60	colon cancer	3	16	262	13324	0.00326132	0.013945
community9	osteosarcoma	7	116	233	13324	0.00327546	0.0139916
community10	hepatocellular carcinoma	12	84	818	13324	0.00330396	0.0140961
community46	lymphoma	3	26	159	13324	0.00330641	0.0140961
community1	nephroblastoma	5	373	38	13324	0.00333132	0.0141883
community15	clear cell renal cell carcinoma	4	65	131	13324	0.00336441	0.0143152
community44	fibrosarcoma	2	27	44	13324	0.00345682	0.0146796
community44	T-cell acute lymphoblastic leukemia	2	27	44	13324	0.00345682	0.0146796
community15	oral squamous cell carcinoma	3	65	64	13324	0.00347152	0.0147277
community53	brain cancer	2	21	57	13324	0.00349048	0.0147936
community36	stomach cancer	5	33	437	13324	0.0034961	0.014803
community6	colorectal carcinoma	4	163	53	13324	0.00350669	0.0148334
community23	bladder urothelial carcinoma	2	50	24	13324	0.00351823	0.0148677
community6	liver cancer	8	163	214	13324	0.00354951	0.0149853
community72	cervical squamous cell carcinoma	1	6	8	13324	0.00359307	0.0151544
community30	lung adenocarcinoma	4	40	219	13324	0.00361088	0.0152058
community72	liver cancer	2	6	214	13324	0.00361225	0.0152058
community40	stomach carcinoma	2	32	38	13324	0.0036219	0.0152316
community73	colon cancer	2	5	262	13324	0.00363098	0.015255
community7	melanoma	10	145	354	13324	0.00365512	0.0153416
community24	melanomatosis	1	49	1	13324	0.00367757	0.0153483
community24	cerebellum cancer	1	49	1	13324	0.00367757	0.0153483
community24	histiocytic sarcoma	1	49	1	13324	0.00367757	0.0153483
community24	meningeal melanoma	1	49	1	13324	0.00367757	0.0153483
community24	plasma cell leukemia	1	49	1	13324	0.00367757	0.0153483
community24	pancreatic ductal adenocarcinoma	4	49	179	13324	0.00367793	0.0153483
community79	prostate cancer	2	3	478	13324	0.0037156	0.0154906
community60	squamous cell carcinoma	2	16	78	13324	0.00374738	0.0155851
community23	familial retinoblastoma	1	50	1	13324	0.00375263	0.0155851
community23	retinal cancer	1	50	1	13324	0.00375263	0.0155851
community23	unilateral retinoblastoma	1	50	1	13324	0.00375263	0.0155851
community51	acute lymphoblastic leukemia	2	23	54	13324	0.00375715	0.0155889
community30	prostate carcinoma	2	40	31	13324	0.0037612	0.0155908
community53	lung non-small cell carcinoma	4	21	434	13324	0.00380399	0.0157532
community72	hepatocellular carcinoma	3	6	818	13324	0.00381617	0.0157831
community59	lymphoepithelioma-like carcinoma	1	17	3	13324	0.00381849	0.0157831
community15	head and neck squamous cell carcinoma	4	65	136	13324	0.00382524	0.015796
community26	thyroid gland cancer	3	47	92	13324	0.00384482	0.0158479
community36	stomach carcinoma	2	33	38	13324	0.00384513	0.0158479
community16	breast carcinoma	3	60	72	13324	0.00384887	0.0158483
community42	skin cancer	2	31	41	13324	0.00394545	0.0162306
community27	esophagus squamous cell carcinoma	4	44	204	13324	0.00395248	0.0162441
community21	endometrial stromal tumor	1	53	1	13324	0.00397778	0.016315
community12	lung cancer	8	74	487	13324	0.00402188	0.016315
community77	hepatoblastoma	1	3	18	13324	0.0040425	0.016315
community76	esophagus adenocarcinoma	1	3	18	13324	0.0040425	0.016315
community44	gastrinoma	1	27	2	13324	0.00404493	0.016315
community44	gliosarcoma	1	27	2	13324	0.00404493	0.016315
community44	acral lentiginous melanoma	1	27	2	13324	0.00404493	0.016315
community44	anaplastic ependymoma	1	27	2	13324	0.00404493	0.016315
community44	atypical chronic myeloid leukemia, BCR-ABL1 negative	1	27	2	13324	0.00404493	0.016315
community44	gestational trophoblastic neoplasm	1	27	2	13324	0.00404493	0.016315
community44	kidney clear cell sarcoma	1	27	2	13324	0.00404493	0.016315
community44	male breast cancer	1	27	2	13324	0.00404493	0.016315
community44	malignant conjunctival melanoma	1	27	2	13324	0.00404493	0.016315
community44	mature B-cell neoplasm	1	27	2	13324	0.00404493	0.016315
community44	melanoma in congenital melanocytic nevus	1	27	2	13324	0.00404493	0.016315
community44	mucinous adenocarcinoma	1	27	2	13324	0.00404493	0.016315
community44	prolymphocytic leukemia	1	27	2	13324	0.00404493	0.016315
community44	spinal cancer	1	27	2	13324	0.00404493	0.016315
community44	supraglottis squamous cell carcinoma	1	27	2	13324	0.00404493	0.016315
community44	thymic carcinoma	1	27	2	13324	0.00404493	0.016315
community53	liver cancer	3	21	214	13324	0.00407643	0.0164268
community12	cervical cancer	5	74	199	13324	0.0041273	0.0166164
community24	diffuse large B-cell lymphoma	3	49	91	13324	0.00418423	0.0168144
community25	diffuse large B-cell lymphoma	3	49	91	13324	0.00418423	0.0168144
community18	nasopharynx carcinoma	3	58	77	13324	0.00421276	0.0169123
community64	hepatocellular carcinoma	4	12	818	13324	0.00421638	0.0169123
community66	neuroblastoma	2	10	135	13324	0.00423199	0.0169592
community24	leukemia	5	49	305	13324	0.00425225	0.0170247
community23	ovarian carcinoma	3	50	90	13324	0.00429126	0.0171651
community24	thyroid gland cancer	3	49	92	13324	0.00431023	0.0172251
community14	clear cell renal cell carcinoma	4	70	131	13324	0.00434222	0.0173369
community18	malignant pheochromocytoma	1	58	1	13324	0.00435305	0.0173642
community7	lung cancer	12	145	487	13324	0.0043766	0.0174421
community25	colorectal cancer	6	49	444	13324	0.00438907	0.0174758
community23	B-cell lymphoma	3	50	91	13324	0.0044218	0.0175835
community3	acute lymphoblastic leukemia	5	279	54	13324	0.00442995	0.0175835
community1	MALT lymphoma	2	373	4	13324	0.00443234	0.0175835
community1	neuroectodermal tumor	2	373	4	13324	0.00443234	0.0175835
community72	erythroleukemia	1	6	10	13324	0.00448796	0.0177325
community72	anaplastic large cell lymphoma	1	6	10	13324	0.00448796	0.0177325
community72	primary cutaneous T-cell non-Hodgkin lymphoma	1	6	10	13324	0.00448796	0.0177325
community74	endocrine gland cancer	1	4	15	13324	0.00448897	0.0177325
community54	teratoma	1	20	3	13324	0.00449032	0.0177325
community67	lung cancer	3	10	487	13324	0.00449514	0.0177341
community30	endometrial carcinoma	2	40	34	13324	0.0044989	0.0177341
community7	oral squamous cell carcinoma	4	145	64	13324	0.00450939	0.0177593
community42	fibrosarcoma	2	31	44	13324	0.00452196	0.0177926
community49	breast cancer	6	24	946	13324	0.00454556	0.0178693
community32	malignant astrocytoma	2	38	36	13324	0.00455075	0.0178736
community46	pancreatic ductal adenocarcinoma	3	26	179	13324	0.00456509	0.0178968
community25	myelodysplastic syndrome	2	49	28	13324	0.00456823	0.0178968
community42	pancreatic cancer	4	31	305	13324	0.00456904	0.0178968
community44	myeloid leukemia	2	27	51	13324	0.00459797	0.0179939
community18	colon cancer	5	58	262	13324	0.00460982	0.0180233
community19	chronic lymphocytic leukemia	3	55	84	13324	0.00461574	0.0180233
community23	pancreatic cancer	5	50	305	13324	0.00461795	0.0180233
community42	reticulosarcoma	1	31	2	13324	0.00464278	0.0180714
community42	childhood lymphoma	1	31	2	13324	0.00464278	0.0180714
community42	thymus cancer	1	31	2	13324	0.00464278	0.0180714
community79	rhabdomyosarcoma	1	3	21	13324	0.00471412	0.0183163
community53	childhood medulloblastoma	1	21	3	13324	0.00471412	0.0183163
community31	brain glioma	5	38	407	13324	0.00473481	0.0183802
community60	invasive lobular carcinoma	1	16	4	13324	0.00478716	0.0185337
community60	thyroid gland anaplastic carcinoma	1	16	4	13324	0.00478716	0.0185337
community61	spindle cell sarcoma	1	16	4	13324	0.00478716	0.0185337
community24	renal cell carcinoma	3	49	96	13324	0.00483617	0.0187067
community8	gallbladder carcinoma	2	145	10	13324	0.00485513	0.0187634
community15	hemangiopericytoma	1	65	1	13324	0.00487841	0.0188366
community6	neuroblastoma	6	163	135	13324	0.00493778	0.0190489
community52	lung adenocarcinoma	3	22	219	13324	0.00494409	0.0190563
community54	breast carcinoma	2	20	72	13324	0.00497619	0.019163
community70	urinary bladder cancer	2	7	215	13324	0.00502146	0.0193105
community30	malignant astrocytoma	2	40	36	13324	0.00502339	0.0193105
community74	neuroendocrine tumor	1	4	17	13324	0.00508521	0.0195308
community2	acute myelomonocytic leukemia	2	312	5	13324	0.00509331	0.0195446
community11	adrenal gland pheochromocytoma	2	77	19	13324	0.00512102	0.0196336
community15	endometrial cancer	3	65	74	13324	0.00515387	0.0197421
community18	retinoblastoma	3	58	83	13324	0.00516101	0.019752
community3	lung squamous cell carcinoma	6	279	80	13324	0.00516621	0.0197545
community8	esophagus squamous cell carcinoma	7	145	204	13324	0.00519847	0.0198603
community54	endometrial cancer	2	20	74	13324	0.00524421	0.0200008
community2	gallbladder cancer	3	312	16	13324	0.00524919	0.0200008
community2	intrahepatic cholangiocarcinoma	3	312	16	13324	0.00524919	0.0200008
community14	fallopian tube cancer	1	70	1	13324	0.00525368	0.0200008
community25	cervical cancer	4	49	199	13324	0.00526354	0.0200208
community18	chronic lymphocytic leukemia	3	58	84	13324	0.00532993	0.0202556
community72	colon cancer	2	6	262	13324	0.00534015	0.0202767
community65	myelodysplastic/myeloproliferative neoplasm	1	12	6	13324	0.00538151	0.0203969
community49	hypopharynx cancer	1	24	3	13324	0.00538514	0.0203969
community13	chronic eosinophilic leukemia	1	72	1	13324	0.00540378	0.0203969
community13	endometrial clear cell adenocarcinoma	1	72	1	13324	0.00540378	0.0203969
community13	muscle cancer	1	72	1	13324	0.00540378	0.0203969
community13	spinal chordoma	1	72	1	13324	0.00540378	0.0203969
community13	lung adenocarcinoma	5	72	219	13324	0.00540471	0.0203969
community10	hepatoblastoma	2	84	18	13324	0.00544358	0.0205258
community33	lung non-small cell carcinoma	5	37	434	13324	0.00547528	0.0206274
community26	lung cancer	6	47	487	13324	0.00548701	0.0206536
community5	head and neck squamous cell carcinoma	7	220	136	13324	0.00549274	0.0206573
community2	malignant mesothelioma	4	312	32	13324	0.00550725	0.0206939
community33	supraglottis squamous cell carcinoma	1	37	2	13324	0.00553888	0.0207948
community1	renal carcinoma	4	373	27	13324	0.00555783	0.0208389
community24	colon carcinoma	2	49	31	13324	0.00556025	0.0208389
community30	thyroid gland papillary carcinoma	2	40	38	13324	0.00557345	0.0208704
community33	stomach cancer	5	37	437	13324	0.00562594	0.0210307
community34	stomach cancer	5	37	437	13324	0.00562594	0.0210307
community36	leukemia	4	33	305	13324	0.00567594	0.0211993
community72	breast cancer	3	6	946	13324	0.00572601	0.0213679
community53	endometrial cancer	2	21	74	13324	0.00576487	0.0214944
community26	skin melanoma	2	47	33	13324	0.00578959	0.0215681
community47	NUT midline carcinoma	1	26	3	13324	0.00583215	0.021708
community58	pancreatic cancer	3	17	305	13324	0.00585897	0.0217822
community7	pancreatic carcinoma	3	145	35	13324	0.00586213	0.0217822
community21	stomach cancer	6	53	437	13324	0.00587279	0.0218032
community55	medulloblastoma	2	19	83	13324	0.00591013	0.0218579
community60	central nervous system lymphoma	1	16	5	13324	0.00597721	0.0218579
community73	gallbladder cancer	1	5	16	13324	0.00597721	0.0218579
community30	acral lentiginous melanoma	1	40	2	13324	0.00598663	0.0218579
community30	adult acute lymphocytic leukemia	1	40	2	13324	0.00598663	0.0218579
community30	anaplastic ependymoma	1	40	2	13324	0.00598663	0.0218579
community30	childhood lymphoma	1	40	2	13324	0.00598663	0.0218579
community30	embryonal cancer	1	40	2	13324	0.00598663	0.0218579
community30	endometrial serous adenocarcinoma	1	40	2	13324	0.00598663	0.0218579
community30	gestational trophoblastic neoplasm	1	40	2	13324	0.00598663	0.0218579
community30	large cell carcinoma	1	40	2	13324	0.00598663	0.0218579
community30	male breast cancer	1	40	2	13324	0.00598663	0.0218579
community30	mature B-cell neoplasm	1	40	2	13324	0.00598663	0.0218579
community30	Merkel cell carcinoma	1	40	2	13324	0.00598663	0.0218579
community30	mixed oligodendroglioma-astrocytoma	1	40	2	13324	0.00598663	0.0218579
community30	plasmablastic lymphoma	1	40	2	13324	0.00598663	0.0218579
community30	prolymphocytic leukemia	1	40	2	13324	0.00598663	0.0218579
community30	thymus cancer	1	40	2	13324	0.00598663	0.0218579
community30	uterine corpus endometrial carcinoma	1	40	2	13324	0.00598663	0.0218579
community34	colorectal cancer	5	37	444	13324	0.00598826	0.0218579
community73	ovarian cancer	2	5	341	13324	0.0060452	0.0218827
community44	anal squamous cell carcinoma	1	27	3	13324	0.00605555	0.0218827
community44	bronchus carcinoma	1	27	3	13324	0.00605555	0.0218827
community44	cervical adenocarcinoma	1	27	3	13324	0.00605555	0.0218827
community44	choroid plexus carcinoma	1	27	3	13324	0.00605555	0.0218827
community44	dedifferentiated liposarcoma	1	27	3	13324	0.00605555	0.0218827
community44	mycosis fungoides	1	27	3	13324	0.00605555	0.0218827
community44	neuroendocrine carcinoma	1	27	3	13324	0.00605555	0.0218827
community44	peritoneal mesothelioma	1	27	3	13324	0.00605555	0.0218827
community44	plasma cell neoplasm	1	27	3	13324	0.00605555	0.0218827
community44	Sezary's disease	1	27	3	13324	0.00605555	0.0218827
community44	well-differentiated liposarcoma	1	27	3	13324	0.00605555	0.0218827
community6	colorectal adenocarcinoma	2	163	10	13324	0.00607328	0.0219285
community28	peripheral T-cell lymphoma	2	43	37	13324	0.00608195	0.0219415
community23	esophagus squamous cell carcinoma	4	50	204	13324	0.00612169	0.0220665
community14	osteosarcoma	5	70	233	13324	0.00615827	0.02218
community74	colorectal cancer	2	4	444	13324	0.00621431	0.0223633
community2	neuroendocrine tumor	3	312	17	13324	0.00622602	0.0223868
community52	prostate cancer	4	22	478	13324	0.00623276	0.0223925
community34	acute myeloid leukemia	4	37	279	13324	0.00624003	0.0224001
community49	stomach cancer	4	24	437	13324	0.00626206	0.0224606
community71	hepatocellular carcinoma	3	7	818	13324	0.00626962	0.0224692
community6	B-lymphoblastic leukemia/lymphoma	3	163	32	13324	0.00627845	0.0224823
community26	lung adenocarcinoma	4	47	219	13324	0.00628647	0.0224825
community3	Burkitt lymphoma	3	279	19	13324	0.00629622	0.0224825
community13	multiple myeloma	3	72	72	13324	0.00630084	0.0224825
community15	prostate adenocarcinoma	2	65	25	13324	0.00630361	0.0224825
community10	splenic marginal zone lymphoma	1	84	1	13324	0.00630441	0.0224825
community1	retinoblastoma	7	373	83	13324	0.00632975	0.0225543
community2	colorectal carcinoma	5	312	53	13324	0.0063794	0.0227126
community31	gastrointestinal system cancer	2	38	43	13324	0.00640002	0.0227673
community30	skin cancer	2	40	41	13324	0.00644541	0.02291
community42	hematologic cancer	2	31	53	13324	0.00645858	0.022938
community15	lymphoma	4	65	159	13324	0.00646488	0.0229416
community18	B-cell lymphoma	3	58	91	13324	0.00660034	0.0233841
community18	diffuse large B-cell lymphoma	3	58	91	13324	0.00660034	0.0233841
community22	B-lymphoblastic leukemia/lymphoma	2	52	32	13324	0.00661871	0.02343
community6	oral squamous cell carcinoma	4	163	64	13324	0.00666372	0.0235652
community32	colorectal cancer	5	38	444	13324	0.00666774	0.0235652
community11	brain glioma	7	77	407	13324	0.00667384	0.0235675
community31	T-cell acute lymphoblastic leukemia	2	38	44	13324	0.00668661	0.0235934
community8	urinary bladder cancer	7	145	215	13324	0.00671947	0.0236901
community9	ovarian carcinoma	4	116	90	13324	0.00672711	0.0236978
community20	leukemia	5	55	305	13324	0.00676308	0.0238052
community25	urinary bladder cancer	4	49	215	13324	0.0068034	0.0239277
community31	acute myeloid leukemia	4	38	279	13324	0.00682981	0.0240011
community1	oral squamous cell carcinoma	6	373	64	13324	0.00683743	0.0240084
community19	stomach cancer	6	55	437	13324	0.00694201	0.0242766
community42	dedifferentiated liposarcoma	1	31	3	13324	0.00694849	0.0242766
community42	fibrosarcoma of bone	1	31	3	13324	0.00694849	0.0242766
community42	ovary adenocarcinoma	1	31	3	13324	0.00694849	0.0242766
community42	tongue carcinoma	1	31	3	13324	0.00694849	0.0242766
community30	neuroblastoma	3	40	135	13324	0.00695024	0.0242766
community64	breast cancer	4	12	946	13324	0.00695296	0.0242766
community7	esophageal cancer	4	145	73	13324	0.007016	0.0244574
community8	esophageal cancer	4	145	73	13324	0.007016	0.0244574
community26	salivary gland cancer	1	47	2	13324	0.00703058	0.0244793
community11	lung adenocarcinoma	5	77	219	13324	0.00703538	0.0244793
community55	diffuse large B-cell lymphoma	2	19	91	13324	0.00703922	0.0244793
community30	head and neck squamous cell carcinoma	3	40	136	13324	0.00708708	0.024626
community40	acute lymphoblastic leukemia	2	32	54	13324	0.00711056	0.0246879
community72	leukemia	2	6	305	13324	0.00714589	0.0247907
community60	diffuse large B-cell lymphoma germinal center B-cell type	1	16	6	13324	0.00716457	0.0248196
community74	prostate cancer	2	4	478	13324	0.00716567	0.0248196
community1	carcinosarcoma	2	373	5	13324	0.00718148	0.0248348
community1	central nervous system lymphoma	2	373	5	13324	0.00718148	0.0248348
community62	stomach cancer	3	13	437	13324	0.00719644	0.0248667
community25	lung adenocarcinoma	4	49	219	13324	0.00722767	0.0249373
community15	chronic lymphocytic leukemia	3	65	84	13324	0.00722838	0.0249373
community50	esophageal cancer	2	24	73	13324	0.00726491	0.0250435
community23	urinary bladder cancer	4	50	215	13324	0.00727746	0.0250641
community2	esophagus adenocarcinoma	3	312	18	13324	0.00729773	0.0250641
community15	skin squamous cell carcinoma	2	65	27	13324	0.00730551	0.0250641
community52	lung squamous cell carcinoma	2	22	80	13324	0.00731225	0.0250641
community24	atypical chronic myeloid leukemia, BCR-ABL1 negative	1	49	2	13324	0.00732865	0.0250641
community24	malignant conjunctival melanoma	1	49	2	13324	0.00732865	0.0250641
community24	melanoma in congenital melanocytic nevus	1	49	2	13324	0.00732865	0.0250641
community24	mixed cell type cancer	1	49	2	13324	0.00732865	0.0250641
community24	small intestine adenocarcinoma	1	49	2	13324	0.00732865	0.0250641
community25	acute biphenotypic leukemia	1	49	2	13324	0.00732865	0.0250641
community7	lung adenocarcinoma	7	145	219	13324	0.0073414	0.0250879
community60	melanoma	3	16	354	13324	0.00735995	0.0251315
community30	fibrosarcoma	2	40	44	13324	0.00737216	0.0251535
community36	hormone producing pituitary cancer	1	33	3	13324	0.00739455	0.02521
community24	malignant astrocytoma	2	49	36	13324	0.00740099	0.0252122
community42	brain cancer	2	31	57	13324	0.00741515	0.0252406
community56	breast cancer	5	19	946	13324	0.00744378	0.0253182
community2	chronic myelomonocytic leukemia	2	312	6	13324	0.00746214	0.02533
community2	islet cell tumor	2	312	6	13324	0.00746214	0.02533
community48	differentiated thyroid gland carcinoma	1	25	4	13324	0.00746476	0.02533
community23	ocular cancer	1	50	2	13324	0.00747765	0.0253539
community1	pancreatic ductal adenocarcinoma	11	373	179	13324	0.00749473	0.025392
community26	nephroblastoma	2	47	38	13324	0.00757885	0.025657
community1	clear cell renal cell carcinoma	9	373	131	13324	0.00760042	0.0257005
community72	chondrosarcoma	1	6	17	13324	0.00760949	0.0257005
community72	liposarcoma	1	6	17	13324	0.00760949	0.0257005
community25	melanoma	5	49	354	13324	0.00761989	0.0257157
community8	glioblastoma	9	145	337	13324	0.00763985	0.0257527
community59	glioblastoma	3	17	337	13324	0.00764273	0.0257527
community18	myeloid neoplasm	2	58	31	13324	0.00766319	0.0257816
community18	prostate carcinoma	2	58	31	13324	0.00766319	0.0257816
community21	endometrial carcinoma	2	53	34	13324	0.00770262	0.0258942
community23	lung adenocarcinoma	4	50	219	13324	0.00772892	0.0259625
community22	uterine corpus endometrial carcinoma	1	52	2	13324	0.00777558	0.026099
community55	renal cell carcinoma	2	19	96	13324	0.00778832	0.0261014
community56	renal cell carcinoma	2	19	96	13324	0.00778832	0.0261014
community25	lung carcinoma	2	49	37	13324	0.00779623	0.0261077
community46	lung adenocarcinoma	3	26	219	13324	0.00781801	0.0261605
community53	ovarian clear cell carcinoma	1	21	5	13324	0.0078333	0.0261915
community36	glioblastoma	4	33	337	13324	0.00789127	0.026365
community21	endometrial stromal sarcoma	1	53	2	13324	0.00792452	0.0264557
community55	leukemia	3	19	305	13324	0.00797436	0.0265812
community55	pancreatic cancer	3	19	305	13324	0.00797436	0.0265812
community10	testicular germ cell cancer	2	84	22	13324	0.00801799	0.026636
community40	pancreatic ductal adenocarcinoma	3	32	179	13324	0.00803958	0.026636
community63	acute megakaryocytic leukemia	1	12	9	13324	0.00805228	0.026636
community74	renal carcinoma	1	4	27	13324	0.00805831	0.026636
community44	childhood acute lymphocytic leukemia	1	27	4	13324	0.00805831	0.026636
community44	Klatskin's tumor	1	27	4	13324	0.00805831	0.026636
community44	peripheral nervous system neoplasm	1	27	4	13324	0.00805831	0.026636
community44	spindle cell sarcoma	1	27	4	13324	0.00805831	0.026636
community44	superficial urinary bladder cancer	1	27	4	13324	0.00805831	0.026636
community44	thyroid gland anaplastic carcinoma	1	27	4	13324	0.00805831	0.026636
community44	tongue cancer	1	27	4	13324	0.00805831	0.026636
community23	lung carcinoma	2	50	37	13324	0.00809966	0.0267523
community24	thyroid gland papillary carcinoma	2	49	38	13324	0.00820024	0.0270639
community13	malignant peripheral nerve sheath tumor	2	72	26	13324	0.00824666	0.0271964
community29	lung non-small cell carcinoma	5	41	434	13324	0.00825495	0.0272031
community80	peripheral T-cell lymphoma	1	3	37	13324	0.00828587	0.0272429
community34	seminoma	1	37	3	13324	0.00828587	0.0272429
community33	acute myeloid leukemia with maturation	1	37	3	13324	0.00828587	0.0272429
community60	myxoid liposarcoma	1	16	7	13324	0.00834925	0.0273997
community61	germ cell cancer	1	16	7	13324	0.00834925	0.0273997
community33	leukemia	4	37	305	13324	0.00835879	0.0273997
community34	pancreatic cancer	4	37	305	13324	0.00835879	0.0273997
community14	renal carcinoma	2	70	27	13324	0.00840245	0.0274988
community19	esophagus squamous cell carcinoma	4	55	204	13324	0.00840291	0.0274988
community33	myeloid leukemia	2	37	51	13324	0.00840803	0.0274988
community1	intrahepatic cholangiocarcinoma	3	373	16	13324	0.00845082	0.0276179
community2	laryngeal squamous cell carcinoma	3	312	19	13324	0.00846481	0.0276428
community73	brain glioma	2	5	407	13324	0.00848511	0.0276883
community31	fibrosarcoma of bone	1	38	3	13324	0.00850853	0.027723
community32	perivascular epithelioid cell tumor	1	38	3	13324	0.00850853	0.027723
community3	oral squamous cell carcinoma	5	279	64	13324	0.00866833	0.028203
community18	mixed oligodendroglioma-astrocytoma	1	58	2	13324	0.00866885	0.028203
community58	melanoma	3	17	354	13324	0.00870136	0.0282606
community59	melanoma	3	17	354	13324	0.00870136	0.0282606
community9	central nervous system embryonal tumor	1	116	1	13324	0.00870609	0.0282606
community5	colorectal cancer	14	220	444	13324	0.00871643	0.028273
community29	acute myeloid leukemia	4	41	279	13324	0.00880019	0.0285234
community24	osteosarcoma	4	49	233	13324	0.00883982	0.0285937
community13	thymoma	2	72	27	13324	0.00885951	0.0285937
community66	cervical cancer	2	10	199	13324	0.00886583	0.0285937
community59	penile cancer	1	17	7	13324	0.00886708	0.0285937
community72	transitional cell carcinoma	1	6	20	13324	0.00894226	0.0285937
community30	teratoma	1	40	3	13324	0.00895365	0.0285937
community30	acute myeloid leukemia with maturation	1	40	3	13324	0.00895365	0.0285937
community30	anal squamous cell carcinoma	1	40	3	13324	0.00895365	0.0285937
community30	bronchus carcinoma	1	40	3	13324	0.00895365	0.0285937
community30	choroid plexus carcinoma	1	40	3	13324	0.00895365	0.0285937
community30	dedifferentiated liposarcoma	1	40	3	13324	0.00895365	0.0285937
community30	fibrosarcoma of bone	1	40	3	13324	0.00895365	0.0285937
community30	lymphoepithelioma-like carcinoma	1	40	3	13324	0.00895365	0.0285937
community30	mycosis fungoides	1	40	3	13324	0.00895365	0.0285937
community30	NUT midline carcinoma	1	40	3	13324	0.00895365	0.0285937
community30	ovarian serous cystadenocarcinoma	1	40	3	13324	0.00895365	0.0285937
community30	ovary adenocarcinoma	1	40	3	13324	0.00895365	0.0285937
community30	sebaceous carcinoma	1	40	3	13324	0.00895365	0.0285937
community30	tongue carcinoma	1	40	3	13324	0.00895365	0.0285937
community30	uterine corpus sarcoma	1	40	3	13324	0.00895365	0.0285937
community16	reticulosarcoma	1	60	2	13324	0.00896642	0.0286134
community14	prostate cancer	7	70	478	13324	0.00904151	0.0288319
community44	esophageal cancer	2	27	73	13324	0.00909189	0.0289712
community13	melanoma	6	72	354	13324	0.00914476	0.0291183
community54	leukemia	3	20	305	13324	0.00916865	0.0291596
community22	nephroblastoma	2	52	38	13324	0.00917117	0.0291596
community17	lung non-small cell carcinoma	6	59	434	13324	0.00918234	0.0291738
community42	oral squamous cell carcinoma	2	31	64	13324	0.00922409	0.0292673
community18	cervical cancer	4	58	199	13324	0.00922528	0.0292673
community42	monocytic leukemia	1	31	4	13324	0.00924378	0.0293046
community37	melanoma	4	33	354	13324	0.00925762	0.0293271
community38	hepatocellular carcinoma	6	32	818	13324	0.00927716	0.0293675
community3	liver cancer	10	279	214	13324	0.0093229	0.0294908
community62	breast cancer	4	13	946	13324	0.00933247	0.0294996
community47	nasopharynx carcinoma	2	26	77	13324	0.00935523	0.02955
community33	Ewing sarcoma	2	37	54	13324	0.00936232	0.0295509
community3	testicular germ cell cancer	3	279	22	13324	0.00939644	0.0296363
community7	embryonal rhabdomyosarcoma	2	145	14	13324	0.00940304	0.0296363
community17	stomach cancer	6	59	437	13324	0.00945451	0.0297769
community24	skin cancer	2	49	41	13324	0.00946385	0.0297847
community31	colorectal carcinoma	2	38	53	13324	0.00950497	0.0298924
community7	meningioma	3	145	42	13324	0.0095372	0.0299721
community48	prostate cancer	4	25	478	13324	0.00966672	0.0303571
community15	congenital mesoblastic nephroma	1	65	2	13324	0.00970996	0.0304269
community15	salivary gland carcinoma	1	65	2	13324	0.00970996	0.0304269
community15	signet ring cell adenocarcinoma	1	65	2	13324	0.00970996	0.0304269
community41	cervical cancer	3	31	199	13324	0.00973808	0.0304729
community30	myeloid leukemia	2	40	51	13324	0.00973869	0.0304729
community10	esophageal cancer	3	84	73	13324	0.00979998	0.0306426
community2	nephroblastoma	4	312	38	13324	0.00982104	0.0306863
community80	T-cell acute lymphoblastic leukemia	1	3	44	13324	0.00984309	0.0307331
community14	lung cancer	7	70	487	13324	0.00986466	0.0307783
community16	lung non-small cell carcinoma	6	60	434	13324	0.00987341	0.0307835
community1	malignant mesothelioma	4	373	32	13324	0.00989297	0.0308223
community9	lymphoma	5	116	159	13324	0.00997157	0.0310377
community1	liposarcoma	3	373	17	13324	0.00997641	0.0310377
community11	gastrointestinal stromal tumor	2	77	27	13324	0.0100467	0.0310984
community44	carcinosarcoma	1	27	5	13324	0.0100532	0.0310984
community44	acute myelomonocytic leukemia	1	27	5	13324	0.0100532	0.0310984
community44	clear cell adenocarcinoma	1	27	5	13324	0.0100532	0.0310984
community44	female reproductive organ cancer	1	27	5	13324	0.0100532	0.0310984
community44	mucosal melanoma	1	27	5	13324	0.0100532	0.0310984
community44	supratentorial ependymoma	1	27	5	13324	0.0100532	0.0310984
community44	testicular cancer	1	27	5	13324	0.0100532	0.0310984
community30	acute leukemia	2	40	52	13324	0.0100992	0.0312185
community7	pancreatic ductal adenocarcinoma	6	145	179	13324	0.0101147	0.0312439
community51	diffuse large B-cell lymphoma	2	23	91	13324	0.0101388	0.0312821
community10	brain glioma	7	84	407	13324	0.0101415	0.0312821
community29	myeloid leukemia	2	41	51	13324	0.0102003	0.0314298
community2	luminal breast carcinoma A	2	312	7	13324	0.0102038	0.0314298
community7	kidney cancer	4	145	82	13324	0.0102392	0.031498
community6	esophageal cancer	4	163	73	13324	0.0102405	0.031498
community23	meningioma	2	50	42	13324	0.0102834	0.0315891
community3	gastrointestinal system cancer	4	279	43	13324	0.0102846	0.0315891
community55	glioblastoma	3	19	337	13324	0.010351	0.0317705
community1	thyroid gland cancer	7	373	92	13324	0.010377	0.0318278
community1	inflammatory myofibroblastic tumor	2	373	6	13324	0.0104722	0.0320969
community14	ovarian carcinoma	3	70	90	13324	0.010507	0.0321808
community22	skin cancer	2	52	41	13324	0.0105772	0.0323731
community76	hepatocellular carcinoma	2	3	818	13324	0.0106025	0.0324049
community77	hepatocellular carcinoma	2	3	818	13324	0.0106025	0.0324049
community66	lung adenocarcinoma	2	10	219	13324	0.0106121	0.0324114
community57	ovarian cancer	3	19	341	13324	0.0106724	0.0325725
community60	thyroid gland medullary carcinoma	1	16	9	13324	0.0107106	0.0326112
community69	pancreatic adenocarcinoma	1	8	18	13324	0.0107114	0.0326112
community72	gastric adenocarcinoma	1	6	24	13324	0.0107146	0.0326112
community22	osteosarcoma	4	52	233	13324	0.0107205	0.0326112
community74	malignant astrocytoma	1	4	36	13324	0.0107226	0.0326112
community60	head and neck squamous cell carcinoma	2	16	136	13324	0.0107726	0.0327402
community24	fibrosarcoma	2	49	44	13324	0.0108026	0.0328083
community30	Ewing sarcoma	2	40	54	13324	0.0108366	0.0328888
community7	ampulla of Vater carcinoma	1	145	1	13324	0.0108826	0.0329806
community7	hairy cell leukemia	1	145	1	13324	0.0108826	0.0329806
community31	brain cancer	2	38	57	13324	0.0108897	0.0329806
community24	plasmacytoma	1	49	3	13324	0.0109534	0.0330542
community24	childhood leukemia	1	49	3	13324	0.0109534	0.0330542
community24	well-differentiated liposarcoma	1	49	3	13324	0.0109534	0.0330542
community25	childhood leukemia	1	49	3	13324	0.0109534	0.0330542
community25	endometrioid ovary carcinoma	1	49	3	13324	0.0109534	0.0330542
community29	hematologic cancer	2	41	53	13324	0.0109597	0.0330542
community25	clear cell renal cell carcinoma	3	49	131	13324	0.0109689	0.0330591
community34	ovarian serous carcinoma	1	37	4	13324	0.011018	0.0331379
community34	thyroid gland anaplastic carcinoma	1	37	4	13324	0.011018	0.0331379
community75	peripheral T-cell lymphoma	1	4	37	13324	0.011018	0.0331379
community20	lung cancer	6	55	487	13324	0.0110264	0.0331402
community12	ovarian clear cell adenocarcinoma	1	74	2	13324	0.0110469	0.033179
community3	T-cell acute lymphoblastic leukemia	4	279	44	13324	0.0110789	0.0332472
community2	rhabdomyosarcoma	3	312	21	13324	0.011085	0.0332472
community72	prostate adenocarcinoma	1	6	25	13324	0.0111568	0.0334397
community10	nasopharynx carcinoma	3	84	77	13324	0.0112467	0.0336432
community18	nephroblastoma	2	58	38	13324	0.011248	0.0336432
community18	stomach carcinoma	2	58	38	13324	0.011248	0.0336432
community44	kidney cancer	2	27	82	13324	0.0112957	0.033722
community31	breast secretory carcinoma	1	38	4	13324	0.0113132	0.033722
community31	Klatskin's tumor	1	38	4	13324	0.0113132	0.033722
community31	monocytic leukemia	1	38	4	13324	0.0113132	0.033722
community31	neuroectodermal tumor	1	38	4	13324	0.0113132	0.033722
community29	Ewing sarcoma	2	41	54	13324	0.0113478	0.0337847
community29	lymphoma	3	41	159	13324	0.011356	0.0337847
community58	leiomyosarcoma	1	17	9	13324	0.0113731	0.0337847
community58	myelofibrosis	1	17	9	13324	0.0113731	0.0337847
community58	mantle cell lymphoma	1	17	9	13324	0.0113731	0.0337847
community13	myeloid neoplasm	2	72	31	13324	0.0114917	0.0341136
community42	T-cell large granular lymphocyte leukemia	1	31	5	13324	0.0115287	0.0342
community14	malignant mesothelioma	2	70	32	13324	0.011573	0.0343079
community46	T-cell prolymphocytic leukemia	1	26	6	13324	0.0115987	0.0343139
community72	cervix carcinoma	1	6	26	13324	0.0115987	0.0343139
community72	malignant peripheral nerve sheath tumor	1	6	26	13324	0.0115987	0.0343139
community77	acute leukemia	1	3	52	13324	0.0116187	0.0343263
community22	tongue carcinoma	1	52	3	13324	0.0116187	0.0343263
community12	prostate cancer	7	74	478	13324	0.0117438	0.0346723
community42	esophageal cancer	2	31	73	13324	0.0117896	0.0347645
community70	glioblastoma	2	7	337	13324	0.0117934	0.0347645
community10	skin squamous cell carcinoma	2	84	27	13324	0.0118122	0.0347645
community76	colorectal carcinoma	1	3	53	13324	0.0118404	0.0347645
community24	neuroblastoma	3	49	135	13324	0.0118463	0.0347645
community42	urinary bladder cancer	3	31	215	13324	0.0118815	0.0347645
community61	chordoma	1	16	10	13324	0.0118872	0.0347645
community60	follicular lymphoma	1	16	10	13324	0.0118872	0.0347645
community60	primary cutaneous T-cell non-Hodgkin lymphoma	1	16	10	13324	0.0118872	0.0347645
community54	cervical squamous cell carcinoma	1	20	8	13324	0.011889	0.0347645
community30	clear cell sarcoma	1	40	4	13324	0.0119033	0.0347645
community30	neuroectodermal tumor	1	40	4	13324	0.0119033	0.0347645
community30	ovarian serous carcinoma	1	40	4	13324	0.0119033	0.0347645
community30	thyroid gland anaplastic carcinoma	1	40	4	13324	0.0119033	0.0347645
community30	tongue cancer	1	40	4	13324	0.0119033	0.0347645
community30	uterine carcinosarcoma	1	40	4	13324	0.0119033	0.0347645
community33	ovarian cancer	4	37	341	13324	0.0119436	0.0348571
community13	thyroid gland cancer	3	72	92	13324	0.011951	0.0348571
community44	blastic plasmacytoid dendritic cell neoplasm	1	27	6	13324	0.0120403	0.0349086
community44	islet cell tumor	1	27	6	13324	0.0120403	0.0349086
community44	papillary carcinoma	1	27	6	13324	0.0120403	0.0349086
community45	islet cell tumor	1	27	6	13324	0.0120403	0.0349086
community72	skin squamous cell carcinoma	1	6	27	13324	0.0120403	0.0349086
community60	hepatocellular carcinoma	4	16	818	13324	0.0120443	0.0349086
community61	hepatocellular carcinoma	4	16	818	13324	0.0120443	0.0349086
community9	pancreatic cancer	7	116	305	13324	0.0120535	0.0349086
community1	endometrial carcinoma	4	373	34	13324	0.0120599	0.0349086
community79	acute lymphoblastic leukemia	1	3	54	13324	0.012062	0.0349086
community80	acute lymphoblastic leukemia	1	3	54	13324	0.012062	0.0349086
community22	fibrosarcoma	2	52	44	13324	0.0120652	0.0349086
community12	prostate carcinoma	2	74	31	13324	0.0120905	0.0349587
community48	thyroid gland cancer	2	25	92	13324	0.0121045	0.0349757
community12	ovarian carcinoma	3	74	90	13324	0.012119	0.0349942
community9	uveal melanoma	2	116	20	13324	0.0122306	0.0352782
community6	nonpapillary renal cell carcinoma	1	163	1	13324	0.0122336	0.0352782
community17	liver cancer	4	59	214	13324	0.0122698	0.0353593
community19	hepatocellular carcinoma	8	55	818	13324	0.0123923	0.0356885
community18	lung adenocarcinoma	4	58	219	13324	0.0124945	0.0359516
community59	brain glioma	3	17	407	13324	0.0125007	0.0359516
community10	congenital mesoblastic nephroma	1	84	2	13324	0.0125303	0.0359516
community10	salivary gland carcinoma	1	84	2	13324	0.0125303	0.0359516
community60	lung non-small cell carcinoma	3	16	434	13324	0.0125334	0.0359516
community61	lung non-small cell carcinoma	3	16	434	13324	0.0125334	0.0359516
community1	renal cell carcinoma	7	373	96	13324	0.0126199	0.0361121
community63	cervical cancer	2	12	199	13324	0.0126212	0.0361121
community64	cervical cancer	2	12	199	13324	0.0126212	0.0361121
community31	pancreatic ductal adenocarcinoma	3	38	179	13324	0.0126226	0.0361121
community29	lung cancer	5	41	487	13324	0.0126912	0.036274
community56	mesenchymal cell neoplasm	1	19	9	13324	0.0126959	0.036274
community79	brain cancer	1	3	57	13324	0.0127263	0.036337
community17	head and neck cancer	2	59	40	13324	0.0127725	0.0364449
community28	head and neck carcinoma	1	43	4	13324	0.0127873	0.0364632
community46	thyroid gland cancer	2	26	92	13324	0.0130245	0.037115
community60	invasive ductal carcinoma	1	16	11	13324	0.0130612	0.0371954
community2	oral squamous cell carcinoma	5	312	64	13324	0.013101	0.0372841
community15	peripheral T-cell lymphoma	2	65	37	13324	0.0132186	0.0375942
community1	pancreatic carcinoma	4	373	35	13324	0.013238	0.0376248
community15	cervical cancer	4	65	199	13324	0.0132716	0.0376955
community13	renal cell carcinoma	3	72	96	13324	0.013316	0.0377968
community6	endocrine gland cancer	2	163	15	13324	0.0133345	0.0378247
community65	endocrine gland cancer	1	12	15	13324	0.0133541	0.0378554
community1	Ewing sarcoma	5	373	54	13324	0.0133875	0.0379175
community9	rhabdomyosarcoma	2	116	21	13324	0.0134022	0.0379175
community9	thyroid gland carcinoma	2	116	21	13324	0.0134022	0.0379175
community33	melanoma	4	37	354	13324	0.0134289	0.0379435
community34	melanoma	4	37	354	13324	0.0134289	0.0379435
community46	T-cell adult acute lymphocytic leukemia	1	26	7	13324	0.0135065	0.0381132
community47	luminal breast carcinoma A	1	26	7	13324	0.0135065	0.0381132
community10	lung non-small cell carcinoma	7	84	434	13324	0.0135705	0.038269
community45	colon cancer	3	27	262	13324	0.0137216	0.0386582
community8	ovarian carcinoma	4	145	90	13324	0.0137304	0.0386582
community34	carcinosarcoma	1	37	5	13324	0.0137352	0.0386582
community11	B-cell lymphoma	3	77	91	13324	0.0137875	0.0386741
community11	B-lymphoblastic leukemia/lymphoma	2	77	32	13324	0.0138011	0.0386741
community36	liver cancer	3	33	214	13324	0.0138021	0.0386741
community42	inflammatory myofibroblastic tumor	1	31	6	13324	0.0138033	0.0386741
community42	islet cell tumor	1	31	6	13324	0.0138033	0.0386741
community42	T-cell prolymphocytic leukemia	1	31	6	13324	0.0138033	0.0386741
community72	prostate carcinoma	1	6	31	13324	0.0138033	0.0386741
community42	lung squamous cell carcinoma	2	31	80	13324	0.0139604	0.0390891
community53	embryonal carcinoma	1	21	9	13324	0.0140154	0.0391036
community71	gastrointestinal stromal tumor	1	7	27	13324	0.0140196	0.0391036
community44	germ cell cancer	1	27	7	13324	0.0140196	0.0391036
community44	inflammatory breast carcinoma	1	27	7	13324	0.0140196	0.0391036
community44	Kaposi's sarcoma	1	27	7	13324	0.0140196	0.0391036
community44	myxoid liposarcoma	1	27	7	13324	0.0140196	0.0391036
community56	gallbladder carcinoma	1	19	10	13324	0.0140875	0.0392676
community31	acute myelomonocytic leukemia	1	38	5	13324	0.0141022	0.0392834
community26	colorectal carcinoma	2	47	53	13324	0.0141183	0.0393032
community11	thyroid gland cancer	3	77	92	13324	0.0141725	0.0394286
community25	myeloid leukemia	2	49	51	13324	0.0142025	0.0394786
community7	B-cell lymphoma	4	145	91	13324	0.0142087	0.0394786
community16	ovarian cancer	5	60	341	13324	0.0142521	0.0395248
community1	luminal breast carcinoma A	2	373	7	13324	0.0142526	0.0395248
community1	ocular melanoma	2	373	7	13324	0.0142526	0.0395248
community63	liver cancer	2	12	214	13324	0.0144348	0.0400044
community14	brain glioma	6	70	407	13324	0.0144553	0.0400357
community21	neuroblastoma	3	53	135	13324	0.0144722	0.0400569
community15	congenital fibrosarcoma	1	65	3	13324	0.014495	0.0400689
community15	desmoplastic small round cell tumor	1	65	3	13324	0.014495	0.0400689
community24	differentiated thyroid gland carcinoma	1	49	4	13324	0.0145519	0.0401239
community24	head and neck carcinoma	1	49	4	13324	0.0145519	0.0401239
community24	ovarian serous carcinoma	1	49	4	13324	0.0145519	0.0401239
community24	peripheral nervous system neoplasm	1	49	4	13324	0.0145519	0.0401239
community42	kidney cancer	2	31	82	13324	0.0146075	0.0402377
community26	acute lymphoblastic leukemia	2	47	54	13324	0.0146116	0.0402377
community36	adrenal cortex cancer	1	33	6	13324	0.0146828	0.0404079
community7	thyroid gland cancer	4	145	92	13324	0.0146962	0.0404193
community24	acute leukemia	2	49	52	13324	0.0147183	0.0404543
community18	cholangiocarcinoma	2	58	44	13324	0.0147571	0.0405354
community9	prostate cancer	9	116	478	13324	0.0148061	0.0405454
community54	uterine cancer	1	20	10	13324	0.0148189	0.0405454
community30	choriocarcinoma	1	40	5	13324	0.0148355	0.0405454
community30	bone sarcoma	1	40	5	13324	0.0148355	0.0405454
community30	breast adenocarcinoma	1	40	5	13324	0.0148355	0.0405454
community30	central nervous system lymphoma	1	40	5	13324	0.0148355	0.0405454
community30	clear cell adenocarcinoma	1	40	5	13324	0.0148355	0.0405454
community30	testicular cancer	1	40	5	13324	0.0148355	0.0405454
community12	acute myeloid leukemia	5	74	279	13324	0.0148619	0.0405664
community3	endometrial cancer	5	279	74	13324	0.0148619	0.0405664
community41	breast cancer	6	31	946	13324	0.0148838	0.0406008
community59	stomach cancer	3	17	437	13324	0.0149855	0.0408523
community26	colorectal cancer	5	47	444	13324	0.0150578	0.0410237
community72	endometrial carcinoma	1	6	34	13324	0.015122	0.0411728
community73	skin cancer	1	5	41	13324	0.0152018	0.0413642
community24	hematologic cancer	2	49	53	13324	0.0152413	0.0414197
community25	colorectal carcinoma	2	49	53	13324	0.0152413	0.0414197
community1	colon adenocarcinoma	3	373	20	13324	0.0153684	0.0417389
community33	cervical cancer	3	37	199	13324	0.0153975	0.0417758
community62	bladder carcinoma	1	13	16	13324	0.0154012	0.0417758
community22	childhood acute lymphocytic leukemia	1	52	4	13324	0.0154323	0.041834
community42	colorectal cancer	4	31	444	13324	0.0154474	0.0418487
community8	cervical cancer	6	145	199	13324	0.0155696	0.0421536
community59	colorectal cancer	3	17	444	13324	0.0155997	0.0422087
community8	myeloid leukemia	3	145	51	13324	0.015705	0.0424565
community2	bladder urothelial carcinoma	3	312	24	13324	0.0157206	0.0424565
community2	gastric adenocarcinoma	3	312	24	13324	0.0157206	0.0424565
community25	acute lymphoblastic leukemia	2	49	54	13324	0.0157715	0.0425673
community23	hematologic cancer	2	50	53	13324	0.0158154	0.0426593
community28	central nervous system lymphoma	1	43	5	13324	0.0159338	0.042947
community12	malignant astrocytoma	2	74	36	13324	0.0159418	0.042947
community17	osteosarcoma	4	59	233	13324	0.015955	0.0429557
community49	acute megakaryocytic leukemia	1	24	9	13324	0.0159887	0.0429933
community50	breast ductal carcinoma	1	24	9	13324	0.0159887	0.0429933
community13	hypopharynx cancer	1	72	3	13324	0.016039	0.0430718
community70	prostate carcinoma	1	7	31	13324	0.0160676	0.0430718
community71	acute promyelocytic leukemia	1	7	31	13324	0.0160676	0.0430718
community42	Kaposi's sarcoma	1	31	7	13324	0.0160676	0.0430718
community42	malignant pleural mesothelioma	1	31	7	13324	0.0160676	0.0430718
community25	lung non-small cell carcinoma	5	49	434	13324	0.0161522	0.043272
community38	stomach cancer	4	32	437	13324	0.0162608	0.0435003
community40	stomach cancer	4	32	437	13324	0.0162608	0.0435003
community54	invasive ductal carcinoma	1	20	11	13324	0.0162775	0.0435003
community54	nasal type extranodal NK/T-cell lymphoma	1	20	11	13324	0.0162775	0.0435003
community34	lung small cell carcinoma	2	37	73	13324	0.0163517	0.0436715
community23	Ewing sarcoma	2	50	54	13324	0.0163643	0.0436783
community22	acute leukemia	2	52	52	13324	0.0164088	0.0437702
community27	lung cancer	5	44	487	13324	0.0164612	0.0438243
community31	cervical cancer	3	38	199	13324	0.0164707	0.0438243
community3	head and neck squamous cell carcinoma	7	279	136	13324	0.0164787	0.0438243
community12	acute myeloid leukemia with maturation	1	74	3	13324	0.0164796	0.0438243
community12	childhood medulloblastoma	1	74	3	13324	0.0164796	0.0438243
community60	atypical teratoid rhabdoid tumor	1	16	14	13324	0.0165673	0.0440036
community60	thyroid gland follicular carcinoma	1	16	14	13324	0.0165673	0.0440036
community6	osteosarcoma	7	163	233	13324	0.0165919	0.044042
community2	leiomyosarcoma	2	312	9	13324	0.0166873	0.0442048
community2	parathyroid carcinoma	2	312	9	13324	0.0166873	0.0442048
community14	leukemia	5	70	305	13324	0.0166939	0.0442048
community14	pancreatic cancer	5	70	305	13324	0.0166939	0.0442048
community8	myeloproliferative neoplasm	2	145	19	13324	0.0167403	0.0442405
community13	stomach carcinoma	2	72	38	13324	0.016743	0.0442405
community13	thyroid gland papillary carcinoma	2	72	38	13324	0.016743	0.0442405
community57	brain glioma	3	19	407	13324	0.0167482	0.0442405
community34	endometrial cancer	2	37	74	13324	0.0167615	0.0442487
community62	liver cancer	2	13	214	13324	0.0167876	0.0442906
community31	teratocarcinoma	1	38	6	13324	0.0168756	0.0444419
community31	blastic plasmacytoid dendritic cell neoplasm	1	38	6	13324	0.0168756	0.0444419
community31	diffuse large B-cell lymphoma germinal center B-cell type	1	38	6	13324	0.0168756	0.0444419
community62	urinary bladder cancer	2	13	215	13324	0.016931	0.0445171
community6	clear cell renal cell carcinoma	5	163	131	13324	0.016932	0.0445171
community28	oral squamous cell carcinoma	2	43	64	13324	0.016935	0.0445171
community39	colorectal cancer	4	32	444	13324	0.0170698	0.0448303
community36	osteosarcoma	3	33	233	13324	0.0170748	0.0448303
community1	thyroid gland papillary carcinoma	4	373	38	13324	0.0171505	0.0450018
community31	lung small cell carcinoma	2	38	73	13324	0.0171678	0.0450202
community18	peripheral nervous system neoplasm	1	58	4	13324	0.0171896	0.045023
community18	tongue cancer	1	58	4	13324	0.0171896	0.045023
community9	gliosarcoma	1	116	2	13324	0.0172619	0.0451577
community9	endometrial stromal sarcoma	1	116	2	13324	0.0172619	0.0451577
community28	pancreatic ductal adenocarcinoma	3	43	179	13324	0.0172743	0.0451629
community7	hematologic cancer	3	145	53	13324	0.0172905	0.0451782
community1	thyroid gland carcinoma	3	373	21	13324	0.0174311	0.0455181
community2	prostate adenocarcinoma	3	312	25	13324	0.0174493	0.0455382
community14	head and neck cancer	2	70	40	13324	0.0174676	0.0455586
community1	lung squamous cell carcinoma	6	373	80	13324	0.0174856	0.045578
community62	lung adenocarcinoma	2	13	219	13324	0.0175094	0.0456128
community36	lung non-small cell carcinoma	4	33	434	13324	0.0175308	0.045641
community22	acute lymphoblastic leukemia	2	52	54	13324	0.017575	0.0457286
community30	teratocarcinoma	1	40	6	13324	0.0177505	0.0460472
community30	adrenal cortex cancer	1	40	6	13324	0.0177505	0.0460472
community30	islet cell tumor	1	40	6	13324	0.0177505	0.0460472
community30	lymphoblastic lymphoma	1	40	6	13324	0.0177505	0.0460472
community30	T-cell prolymphocytic leukemia	1	40	6	13324	0.0177505	0.0460472
community44	adult T-cell leukemia/lymphoma	1	27	9	13324	0.0179549	0.0464111
community44	embryonal carcinoma	1	27	9	13324	0.0179549	0.0464111
community44	mantle cell lymphoma	1	27	9	13324	0.0179549	0.0464111
community44	pancreatic ductal carcinoma	1	27	9	13324	0.0179549	0.0464111
community44	parathyroid carcinoma	1	27	9	13324	0.0179549	0.0464111
community44	thyroid gland medullary carcinoma	1	27	9	13324	0.0179549	0.0464111
community24	acute monocytic leukemia	1	49	5	13324	0.0181243	0.0467376
community24	acute myelomonocytic leukemia	1	49	5	13324	0.0181243	0.0467376
community24	epithelioid sarcoma	1	49	5	13324	0.0181243	0.0467376
community24	testicular cancer	1	49	5	13324	0.0181243	0.0467376
community72	skin cancer	1	6	41	13324	0.0181874	0.0468581
community21	Ewing sarcoma	2	53	54	13324	0.0181926	0.0468581
community81	kidney cancer	1	3	82	13324	0.0182391	0.0469231
community52	clear cell renal cell carcinoma	2	22	131	13324	0.0182395	0.0469231
community7	colon adenocarcinoma	2	145	20	13324	0.0184004	0.0472811
community7	uveal melanoma	2	145	20	13324	0.0184004	0.0472811
community33	liver cancer	3	37	214	13324	0.0184369	0.0473469
community79	retinoblastoma	1	3	83	13324	0.0184587	0.0473749
community23	lung oat cell carcinoma	1	50	5	13324	0.0184886	0.0474235
community80	chronic lymphocytic leukemia	1	3	84	13324	0.0186783	0.0478497
community10	childhood leukemia	1	84	3	13324	0.0186783	0.0478497
community3	acute leukemia	4	279	52	13324	0.0186878	0.0478497
community40	B-cell lymphoma	2	32	91	13324	0.0187111	0.0478811
community30	cervical cancer	3	40	199	13324	0.018725	0.0478821
community6	esophagus adenocarcinoma	2	163	18	13324	0.0187336	0.0478821
community23	lymphoma	3	50	159	13324	0.0187731	0.0479547
community19	colorectal carcinoma	2	55	53	13324	0.0188066	0.0480121
community30	esophageal cancer	2	40	73	13324	0.0188452	0.0480495
community71	lung non-small cell carcinoma	2	7	434	13324	0.0188524	0.0480495
community50	breast cancer	5	24	946	13324	0.0188545	0.0480495
community60	bladder carcinoma	1	16	16	13324	0.0188913	0.0481153
community40	childhood acute myeloid leukemia	1	32	8	13324	0.0189026	0.0481157
community75	oral squamous cell carcinoma	1	4	64	13324	0.0189422	0.0481881
community71	stomach cancer	2	7	437	13324	0.019092	0.0485409
community15	breast secretory carcinoma	1	65	4	13324	0.0192338	0.0487585
community15	clear cell sarcoma	1	65	4	13324	0.0192338	0.0487585
community15	head and neck carcinoma	1	65	4	13324	0.0192338	0.0487585
community15	mucoepidermoid carcinoma	1	65	4	13324	0.0192338	0.0487585
community15	spindle cell sarcoma	1	65	4	13324	0.0192338	0.0487585
community37	breast cancer	6	33	946	13324	0.0193347	0.0489674
community41	prostate cancer	4	31	478	13324	0.0193388	0.0489674
community32	hepatocellular carcinoma	6	38	818	13324	0.0193609	0.0489949
community63	testicular germ cell cancer	1	12	22	13324	0.0194729	0.0492496
community67	pancreatic cancer	2	10	305	13324	0.0195521	0.0494212
community21	testicular cancer	1	53	5	13324	0.0195802	0.0494389
community9	ovarian cancer	7	116	341	13324	0.0195824	0.0494389
community62	osteosarcoma	2	13	233	13324	0.0195933	0.0494389
community31	inflammatory breast carcinoma	1	38	7	13324	0.0196336	0.0495117
community70	colorectal cancer	2	7	444	13324	0.0196558	0.049539
community29	esophageal cancer	2	41	73	13324	0.0197057	0.049636
community55	lymphoma	2	19	159	13324	0.0197804	0.0497777
community37	B-cell lymphoma	2	33	91	13324	0.0197849	0.0497777
community9	cervix carcinoma	2	116	26	13324	0.0198677	0.0499555
community45	erythroleukemia	1	27	10	13324	0.0199109	0.0499555
community44	primary cutaneous T-cell non-Hodgkin lymphoma	1	27	10	13324	0.0199109	0.0499555
community44	uterine cancer	1	27	10	13324	0.0199109	0.0499555
community14	gastrointestinal system cancer	2	70	43	13324	0.0199131	0.0499555
community55	stomach cancer	3	19	437	13324	0.019984	0.0501044
community18	acute leukemia	2	58	52	13324	0.0199972	0.0501084
community59	gallbladder cancer	1	17	16	13324	0.0200494	0.0502104
community7	rhabdomyosarcoma	2	145	21	13324	0.0201187	0.0503368
community53	bone cancer	1	21	13	13324	0.0201231	0.0503368
community78	diffuse large B-cell lymphoma	1	3	91	13324	0.0202134	0.0505336
community6	diffuse large B-cell lymphoma	4	163	91	13324	0.0202319	0.0505506
community5	intestinal cancer	2	220	14	13324	0.0202605	0.0505928
community12	pancreatic cancer	5	74	305	13324	0.0202745	0.0505988
community14	colorectal cancer	6	70	444	13324	0.0203319	0.0507002
community24	pancreatic cancer	4	49	305	13324	0.0203665	0.0507002
community2	follicular lymphoma	2	312	10	13324	0.0203735	0.0507002
community2	primary cutaneous T-cell non-Hodgkin lymphoma	2	312	10	13324	0.0203735	0.0507002
community2	uterine cancer	2	312	10	13324	0.0203735	0.0507002
community22	stomach cancer	5	52	437	13324	0.0204255	0.0508004
community42	adult T-cell leukemia/lymphoma	1	31	9	13324	0.0205653	0.0510327
community42	thyroid gland medullary carcinoma	1	31	9	13324	0.0205653	0.0510327
community42	tongue squamous cell carcinoma	1	31	9	13324	0.0205653	0.0510327
community30	germ cell cancer	1	40	7	13324	0.0206482	0.0510327
community30	inflammatory breast carcinoma	1	40	7	13324	0.0206482	0.0510327
community30	Kaposi's sarcoma	1	40	7	13324	0.0206482	0.0510327
community30	luminal breast carcinoma A	1	40	7	13324	0.0206482	0.0510327
community30	malignant pleural mesothelioma	1	40	7	13324	0.0206482	0.0510327
community30	myxoid liposarcoma	1	40	7	13324	0.0206482	0.0510327
community30	penile cancer	1	40	7	13324	0.0206482	0.0510327
community30	T-cell adult acute lymphocytic leukemia	1	40	7	13324	0.0206482	0.0510327
community6	myeloproliferative neoplasm	2	163	19	13324	0.0206842	0.0510578
community14	Klatskin's tumor	1	70	4	13324	0.0206899	0.0510578
community18	colorectal carcinoma	2	58	53	13324	0.0206937	0.0510578
community14	liver cancer	4	70	214	13324	0.0207378	0.05112
community30	nasopharynx carcinoma	2	40	77	13324	0.0207425	0.05112
community57	colorectal cancer	3	19	444	13324	0.0207806	0.0511848
community3	female reproductive endometrioid cancer	1	279	1	13324	0.0209397	0.0515182
community3	spindle cell thymoma	1	279	1	13324	0.0209397	0.0515182
community55	B-cell acute lymphoblastic leukemia	1	19	15	13324	0.0209887	0.0516097
community73	brain cancer	1	5	57	13324	0.0210326	0.0516882
community47	low grade glioma	1	26	11	13324	0.0210655	0.0517398
community1	chronic lymphocytic leukemia	6	373	84	13324	0.0211374	0.0518872
community32	kidney cancer	2	38	82	13324	0.0211701	0.0519126
community2	thymoma	3	312	27	13324	0.0211717	0.0519126
community60	pancreatic adenocarcinoma	1	16	18	13324	0.0212049	0.0519266
community50	thymus lymphoma	1	24	12	13324	0.021208	0.0519266
community40	pancreatic ductal carcinoma	1	32	9	13324	0.0212159	0.0519266
community57	hepatocellular carcinoma	4	19	818	13324	0.0212253	0.0519266
community9	thymoma	2	116	27	13324	0.0212732	0.0520144
community3	kidney cancer	5	279	82	13324	0.0212971	0.0520436
community18	acute monocytic leukemia	1	58	5	13324	0.0213951	0.0521749
community18	female reproductive organ cancer	1	58	5	13324	0.0213951	0.0521749
community18	mucosal melanoma	1	58	5	13324	0.0213951	0.0521749
community18	acute lymphoblastic leukemia	2	58	54	13324	0.0213989	0.0521749
community20	brain cancer	2	55	57	13324	0.0214359	0.0522356
community7	brain ependymoma	1	145	2	13324	0.02153	0.0523474
community8	childhood kidney cancer	1	145	2	13324	0.02153	0.0523474
community8	endometrial serous adenocarcinoma	1	145	2	13324	0.02153	0.0523474
community8	kidney clear cell sarcoma	1	145	2	13324	0.02153	0.0523474
community60	cervical cancer	2	16	199	13324	0.0216191	0.0523961
community24	teratocarcinoma	1	49	6	13324	0.0216708	0.0523961
community24	biliary tract cancer	1	49	6	13324	0.0216708	0.0523961
community24	blastic plasmacytoid dendritic cell neoplasm	1	49	6	13324	0.0216708	0.0523961
community24	chronic myelomonocytic leukemia	1	49	6	13324	0.0216708	0.0523961
community24	lymphoblastic lymphoma	1	49	6	13324	0.0216708	0.0523961
community24	myelodysplastic/myeloproliferative neoplasm	1	49	6	13324	0.0216708	0.0523961
community24	papillary carcinoma	1	49	6	13324	0.0216708	0.0523961
community24	T-cell prolymphocytic leukemia	1	49	6	13324	0.0216708	0.0523961
community25	myelodysplastic/myeloproliferative neoplasm	1	49	6	13324	0.0216708	0.0523961
community17	acute monocytic leukemia	1	59	5	13324	0.0217574	0.0525764
community36	renal cell carcinoma	2	33	96	13324	0.0217747	0.0525888
community44	central nervous system cancer	1	27	11	13324	0.0218593	0.0526331
community44	invasive ductal carcinoma	1	27	11	13324	0.0218593	0.0526331
community44	low grade glioma	1	27	11	13324	0.0218593	0.0526331
community44	rectum cancer	1	27	11	13324	0.0218593	0.0526331
community36	acute megakaryocytic leukemia	1	33	9	13324	0.0218658	0.0526331
community36	tongue squamous cell carcinoma	1	33	9	13324	0.0218658	0.0526331
community7	lymphoma	5	145	159	13324	0.022035	0.053011
community23	blastic plasmacytoid dendritic cell neoplasm	1	50	6	13324	0.0221047	0.0530966
community23	inflammatory myofibroblastic tumor	1	50	6	13324	0.0221047	0.0530966
community20	acute myeloid leukemia	4	55	279	13324	0.0221092	0.0530966
community16	female reproductive organ cancer	1	60	5	13324	0.0221195	0.0530966
community14	lung adenocarcinoma	4	70	219	13324	0.0221924	0.0532422
community11	cervical cancer	4	77	199	13324	0.0222048	0.0532425
community60	adrenal gland pheochromocytoma	1	16	19	13324	0.0223577	0.0535642
community28	cervical cancer	3	43	199	13324	0.0223691	0.0535642
community31	laryngeal carcinoma	1	38	8	13324	0.022376	0.0535642
community70	prostate cancer	2	7	478	13324	0.0224858	0.0537975
community60	esophagus squamous cell carcinoma	2	16	204	13324	0.022601	0.0540431
community17	colon cancer	4	59	262	13324	0.0226383	0.0541027
community6	colon adenocarcinoma	2	163	20	13324	0.0227043	0.0542305
community11	alveolar soft part sarcoma	1	77	4	13324	0.0227228	0.0542448
community54	stomach cancer	3	20	437	13324	0.0227437	0.0542648
community41	adrenocortical carcinoma	1	31	10	13324	0.0227989	0.0543367
community41	follicular lymphoma	1	31	10	13324	0.0227989	0.0543367
community12	fibrosarcoma	2	74	44	13324	0.0229196	0.0545944
community49	endometrial adenocarcinoma	1	24	13	13324	0.0229357	0.0546028
community22	lymphoblastic lymphoma	1	52	6	13324	0.0229716	0.0546582
community6	hematologic cancer	3	163	53	13324	0.0229899	0.0546718
community75	squamous cell carcinoma	1	4	78	13324	0.0230127	0.0546961
community1	thyroid gland medullary carcinoma	2	373	9	13324	0.0230906	0.0548066
community1	tongue squamous cell carcinoma	2	373	9	13324	0.0230906	0.0548066
community10	acute myeloid leukemia	5	84	279	13324	0.0231097	0.0548066
community3	chronic lymphocytic leukemia	5	279	84	13324	0.0231097	0.0548066
community30	kidney cancer	2	40	82	13324	0.0232068	0.0549985
community11	pancreatic cancer	5	77	305	13324	0.0232159	0.0549985
community36	prostate cancer	4	33	478	13324	0.0233882	0.0551422
community21	teratocarcinoma	1	53	6	13324	0.0234045	0.0551422
community72	colorectal carcinoma	1	6	53	13324	0.0234045	0.0551422
community66	glioblastoma	2	10	337	13324	0.0234119	0.0551422
community2	kidney rhabdoid cancer	1	312	1	13324	0.0234164	0.0551422
community2	mesenchymal chondrosarcoma	1	312	1	13324	0.0234164	0.0551422
community2	microinvasive gastric cancer	1	312	1	13324	0.0234164	0.0551422
community2	ossifying fibromyxoid tumor	1	312	1	13324	0.0234164	0.0551422
community2	ovarian small cell carcinoma	1	312	1	13324	0.0234164	0.0551422
community2	rhabdoid meningioma	1	312	1	13324	0.0234164	0.0551422
community2	vulva squamous cell carcinoma	1	312	1	13324	0.0234164	0.0551422
community38	uterine cancer	1	32	10	13324	0.0235184	0.0552572
community30	anaplastic astrocytoma	1	40	8	13324	0.0235289	0.0552572
community30	cervical squamous cell carcinoma	1	40	8	13324	0.0235289	0.0552572
community30	laryngeal carcinoma	1	40	8	13324	0.0235289	0.0552572
community30	small cell carcinoma	1	40	8	13324	0.0235289	0.0552572
community6	renal cell carcinoma	4	163	96	13324	0.0236719	0.055563
community19	lymphoma	3	55	159	13324	0.0236856	0.0555652
community30	retinoblastoma	2	40	83	13324	0.0237116	0.0555961
community63	thymoma	1	12	27	13324	0.0237999	0.0557429
community63	gastrointestinal stromal tumor	1	12	27	13324	0.0237999	0.0557429
community72	acute lymphoblastic leukemia	1	6	54	13324	0.0238371	0.0557999
community15	acinar cell carcinoma	1	65	5	13324	0.0239267	0.0559493
community15	ovarian clear cell carcinoma	1	65	5	13324	0.0239267	0.0559493
community26	glioblastoma	4	47	337	13324	0.0241084	0.0563439
community6	adult acute lymphocytic leukemia	1	163	2	13324	0.0241696	0.0563655
community6	myoepithelial carcinoma	1	163	2	13324	0.0241696	0.0563655
community6	peritoneal carcinoma	1	163	2	13324	0.0241696	0.0563655
community6	small intestine adenocarcinoma	1	163	2	13324	0.0241696	0.0563655
community31	osteosarcoma	3	38	233	13324	0.0241938	0.0563917
community30	chronic lymphocytic leukemia	2	40	84	13324	0.0242202	0.0564229
community37	adrenocortical carcinoma	1	33	10	13324	0.0242369	0.0564314
community8	melanoma	8	145	354	13324	0.0243639	0.0566599
community6	cervical cancer	6	163	199	13324	0.0243712	0.0566599
community1	gastric adenocarcinoma	3	373	24	13324	0.0243742	0.0566599
community14	ovarian cancer	5	70	341	13324	0.0244337	0.0567009
community55	pancreatic ductal adenocarcinoma	2	19	179	13324	0.0244468	0.0567009
community57	pancreatic ductal adenocarcinoma	2	19	179	13324	0.0244468	0.0567009
community33	mesenchymal cell neoplasm	1	37	9	13324	0.0244572	0.0567009
community34	mantle cell lymphoma	1	37	9	13324	0.0244572	0.0567009
community20	breast cancer	8	55	946	13324	0.0245412	0.0568551
community26	multiple myeloma	2	47	72	13324	0.0245499	0.0568551
community60	liver cancer	2	16	214	13324	0.0246125	0.0569394
community61	liver cancer	2	16	214	13324	0.0246125	0.0569394
community60	thyroid gland carcinoma	1	16	21	13324	0.0246555	0.0569907
community64	myelodysplastic syndrome	1	12	28	13324	0.0246609	0.0569907
community10	childhood acute lymphocytic leukemia	1	84	4	13324	0.0247492	0.0571476
community17	brain glioma	5	59	407	13324	0.0247597	0.0571476
community34	thyroid gland cancer	2	37	92	13324	0.0247683	0.0571476
community6	lymphoid leukemia	2	163	21	13324	0.0247906	0.0571685
community26	ovarian cancer	4	47	341	13324	0.0249457	0.0574958
community42	larynx cancer	1	31	11	13324	0.0250222	0.0575803
community42	rectum cancer	1	31	11	13324	0.0250222	0.0575803
community42	serous cystadenocarcinoma	1	31	11	13324	0.0250222	0.0575803
community32	mantle cell lymphoma	1	38	9	13324	0.0251031	0.0576746
community32	parathyroid carcinoma	1	38	9	13324	0.0251031	0.0576746
community32	tongue squamous cell carcinoma	1	38	9	13324	0.0251031	0.0576746
community72	brain cancer	1	6	57	13324	0.025133	0.0577127
community26	esophageal cancer	2	47	73	13324	0.0251557	0.0577344
community28	childhood acute myeloid leukemia	1	43	8	13324	0.0252536	0.0579284
community5	lung small cell carcinoma	4	220	73	13324	0.0254128	0.0582628
community18	T-cell prolymphocytic leukemia	1	58	6	13324	0.0255642	0.0585331
community67	melanoma	2	10	354	13324	0.0255678	0.0585331
community7	bladder urothelial carcinoma	2	145	24	13324	0.0255981	0.0585331
community7	gastric adenocarcinoma	2	145	24	13324	0.0255981	0.0585331
community8	gastric adenocarcinoma	2	145	24	13324	0.0255981	0.0585331
community9	cervical adenocarcinoma	1	116	3	13324	0.0256693	0.058665
community23	myxoid liposarcoma	1	50	7	13324	0.0256939	0.0586903
community44	papillary renal cell carcinoma	1	27	13	13324	0.0257329	0.0587483
community26	endometrial cancer	2	47	74	13324	0.0257667	0.0587946
community2	acute leukemia	4	312	52	13324	0.0259334	0.059144
community17	myelodysplastic/myeloproliferative neoplasm	1	59	6	13324	0.0259952	0.0592204
community55	lung cancer	3	19	487	13324	0.0260078	0.0592204
community57	lung cancer	3	19	487	13324	0.0260078	0.0592204
community29	hepatocellular carcinoma	6	41	818	13324	0.0260976	0.0593936
community59	esophageal carcinoma	1	17	21	13324	0.026157	0.0594977
community16	brain glioma	5	60	407	13324	0.026192	0.0595246
community15	acute lymphoblastic leukemia	2	65	54	13324	0.0261963	0.0595246
community30	acute megakaryocytic leukemia	1	40	9	13324	0.0263925	0.0596891
community30	adult T-cell leukemia/lymphoma	1	40	9	13324	0.0263925	0.0596891
community30	breast ductal carcinoma	1	40	9	13324	0.0263925	0.0596891
community30	embryonal carcinoma	1	40	9	13324	0.0263925	0.0596891
community30	thyroid gland medullary carcinoma	1	40	9	13324	0.0263925	0.0596891
community30	tongue squamous cell carcinoma	1	40	9	13324	0.0263925	0.0596891
community10	meningioma	2	84	42	13324	0.0264063	0.0596891
community16	inflammatory myofibroblastic tumor	1	60	6	13324	0.0264258	0.0596891
community24	multiple myeloma	2	49	72	13324	0.0264265	0.0596891
community55	rhabdoid cancer	1	19	19	13324	0.0264422	0.0596891
community56	laryngeal squamous cell carcinoma	1	19	19	13324	0.0264422	0.0596891
community13	clear cell adenocarcinoma	1	72	5	13324	0.0264475	0.0596891
community13	ovarian clear cell carcinoma	1	72	5	13324	0.0264475	0.0596891
community28	liver cancer	3	43	214	13324	0.026601	0.0600043
community46	thyroid gland follicular carcinoma	1	26	14	13324	0.0266599	0.0601059
community6	esophagus squamous cell carcinoma	6	163	204	13324	0.0266822	0.0601249
community31	lung non-small cell carcinoma	4	38	434	13324	0.0268278	0.0604217
community18	lymphoma	3	58	159	13324	0.0268865	0.0605225
community6	skin carcinoma	2	163	22	13324	0.0269396	0.0605862
community51	gallbladder cancer	1	23	16	13324	0.0269427	0.0605862
community35	lung cancer	4	34	487	13324	0.0269741	0.0606255
community24	esophageal cancer	2	49	73	13324	0.0270745	0.0608165
community33	adrenocortical carcinoma	1	37	10	13324	0.0271012	0.0608165
community34	uterine cancer	1	37	10	13324	0.0271012	0.0608165
community9	acute promyelocytic leukemia	2	116	31	13324	0.0272282	0.0610232
community41	liver carcinoma	1	31	12	13324	0.0272355	0.0610232
community42	thymus lymphoma	1	31	12	13324	0.0272355	0.0610232
community8	oral squamous cell carcinoma	3	145	64	13324	0.0273187	0.0611781
community30	ovarian carcinoma	2	40	90	13324	0.0273503	0.0612124
community32	stomach cancer	4	38	437	13324	0.0273622	0.0612124
community23	multiple myeloma	2	50	72	13324	0.0273824	0.061226
community11	stomach cancer	6	77	437	13324	0.0274416	0.0613135
community59	liver cancer	2	17	214	13324	0.0274498	0.0613135
community7	prostate adenocarcinoma	2	145	25	13324	0.0275249	0.0614495
community26	cervical squamous cell carcinoma	1	47	8	13324	0.0275446	0.061462
community53	hepatoblastoma	1	21	18	13324	0.0276541	0.0616204
community53	esophagus adenocarcinoma	1	21	18	13324	0.0276541	0.0616204
community44	thyroid gland follicular carcinoma	1	27	14	13324	0.0276582	0.0616204
community71	Ewing sarcoma	1	7	54	13324	0.0276993	0.0616803
community54	laryngeal squamous cell carcinoma	1	20	19	13324	0.0277962	0.0617674
community31	erythroleukemia	1	38	10	13324	0.0278148	0.0617674
community31	primary cutaneous T-cell non-Hodgkin lymphoma	1	38	10	13324	0.0278148	0.0617674
community29	brain glioma	4	41	407	13324	0.0278446	0.0617674
community30	B-cell lymphoma	2	40	91	13324	0.0278846	0.0617674
community14	acute leukemia	2	70	52	13324	0.0279206	0.0617674
community31	renal cell carcinoma	2	38	96	13324	0.0279807	0.0617674
community32	renal cell carcinoma	2	38	96	13324	0.0279807	0.0617674
community1	eccrine porocarcinoma	1	373	1	13324	0.0279946	0.0617674
community1	ethmoid sinus adenocarcinoma	1	373	1	13324	0.0279946	0.0617674
community1	female breast cancer	1	373	1	13324	0.0279946	0.0617674
community1	gastroesophageal junction adenocarcinoma	1	373	1	13324	0.0279946	0.0617674
community1	granulosa cell tumor	1	373	1	13324	0.0279946	0.0617674
community1	IDH-wildtype glioblastoma	1	373	1	13324	0.0279946	0.0617674
community1	pharynx cancer	1	373	1	13324	0.0279946	0.0617674
community1	rectum adenocarcinoma	1	373	1	13324	0.0279946	0.0617674
community1	sarcomatoid carcinoma	1	373	1	13324	0.0279946	0.0617674
community1	transient myeloproliferative syndrome	1	373	1	13324	0.0279946	0.0617674
community1	chordoma	2	373	10	13324	0.028059	0.0617839
community1	erythroleukemia	2	373	10	13324	0.028059	0.0617839
community1	anaplastic large cell lymphoma	2	373	10	13324	0.028059	0.0617839
community1	follicular lymphoma	2	373	10	13324	0.028059	0.0617839
community72	oral squamous cell carcinoma	1	6	64	13324	0.0281451	0.061942
community19	Kaposi's sarcoma	1	55	7	13324	0.0281995	0.0620167
community54	prostate cancer	3	20	478	13324	0.0282109	0.0620167
community8	osteosarcoma	6	145	233	13324	0.0282321	0.0620167
community11	T-cell large granular lymphocyte leukemia	1	77	5	13324	0.0282415	0.0620167
community12	glioblastoma	5	74	337	13324	0.0282505	0.0620167
community5	lung non-small cell carcinoma	12	220	434	13324	0.0283565	0.0622179
community3	endometrial carcinoma	3	279	34	13324	0.0283869	0.0622532
community9	urinary bladder cancer	5	116	215	13324	0.0284999	0.0624543
community47	non-Hodgkin lymphoma	1	26	15	13324	0.0285105	0.0624543
community29	ovarian carcinoma	2	41	90	13324	0.0285624	0.0624543
community19	leukemia	4	55	305	13324	0.0285683	0.0624543
community19	pancreatic cancer	4	55	305	13324	0.0285683	0.0624543
community15	lymphoblastic lymphoma	1	65	6	13324	0.0285741	0.0624543
community59	pituitary cancer	1	17	23	13324	0.0285793	0.0624543
community31	colorectal cancer	4	38	444	13324	0.0286298	0.0625332
community43	intestinal cancer	1	28	14	13324	0.0286545	0.0625556
community24	anaplastic astrocytoma	1	49	8	13324	0.0286864	0.0625938
community45	breast cancer	5	27	946	13324	0.0287347	0.0626677
community13	osteosarcoma	4	72	233	13324	0.028756	0.0626826
community18	oral squamous cell carcinoma	2	58	64	13324	0.0288982	0.0629357
community2	acute lymphoblastic leukemia	4	312	54	13324	0.0289047	0.0629357
community79	clear cell renal cell carcinoma	1	3	131	13324	0.0289228	0.0629357
community36	liver carcinoma	1	33	12	13324	0.0289446	0.0629357
community64	skin melanoma	1	12	33	13324	0.0289446	0.0629357
community29	osteosarcoma	3	41	233	13324	0.0290116	0.0630338
community3	ovarian carcinoma	5	279	90	13324	0.0290188	0.0630338
community29	B-cell lymphoma	2	41	91	13324	0.0291182	0.0632181
[truncated: 2,341 more rows]

## Sheet: Cancer types-community number
cancer types	Number of communities				community	Number of cancer
breast cancer	48				community44	213
hepatocellular carcinoma	46				community30	151
prostate cancer	36				community2	101
stomach cancer	36				community24	87
lung non-small cell carcinoma	34				community42	77
brain glioma	33				community1	68
colorectal cancer	32				community15	58
lung cancer	31				community18	52
melanoma	30				community72	48
ovarian cancer	28				community25	46
glioblastoma	25				community3	44
lung adenocarcinoma	25				community60	44
leukemia	24				community23	40
pancreatic cancer	24				community7	38
colon cancer	22				community13	36
cervical cancer	21				community31	36
liver cancer	21				community6	30
osteosarcoma	21				community53	29
urinary bladder cancer	21				community12	22
pancreatic ductal adenocarcinoma	18				community9	22
head and neck squamous cell carcinoma	17				community22	21
acute myeloid leukemia	16				community34	21
clear cell renal cell carcinoma	16				community8	20
esophagus squamous cell carcinoma	16				community33	19
lymphoma	16				community55	19
thyroid gland cancer	16				community10	17
neuroblastoma	14				community14	17
ovarian carcinoma	14				community26	16
B-cell lymphoma	13				community29	16
diffuse large B-cell lymphoma	13				community36	16
acute lymphoblastic leukemia	12				community11	15
esophageal cancer	12				community59	15
retinoblastoma	12				community17	14
endometrial cancer	11				community16	12
Ewing sarcoma	11				community28	12
hematologic cancer	11				community54	12
medulloblastoma	11				community21	11
oral squamous cell carcinoma	11				community79	11
renal cell carcinoma	11				community19	9
skin cancer	11				community73	9
brain cancer	10				community39	8
breast carcinoma	10				community40	8
chronic lymphocytic leukemia	10				community5	8
colorectal carcinoma	10				community61	8
peripheral T-cell lymphoma	10				community62	8
acute leukemia	9				community74	8
kidney cancer	9				community77	8
multiple myeloma	9				community32	7
nasopharynx carcinoma	9				community45	7
T-cell acute lymphoblastic leukemia	9				community46	7
endometrial carcinoma	8				community51	7
fibrosarcoma	8				community71	7
lung small cell carcinoma	8				community50	6
lung squamous cell carcinoma	8				community58	6
malignant astrocytoma	8				community80	6
myeloid leukemia	8				community64	5
nephroblastoma	8				community66	5
prostate carcinoma	8				community27	4
squamous cell carcinoma	8				community41	4
meningioma	7				community49	4
prostate adenocarcinoma	7				community52	4
stomach carcinoma	7				community56	4
acute promyelocytic leukemia	6				community63	4
B-lymphoblastic leukemia/lymphoma	6				community65	4
gastrointestinal system cancer	6				community70	4
head and neck cancer	6				community76	4
hepatoblastoma	6				community20	3
pancreatic carcinoma	6				community35	3
testicular germ cell cancer	6				community37	3
thyroid gland papillary carcinoma	6				community38	3
bladder carcinoma	5				community47	3
Burkitt lymphoma	5				community48	3
cholangiocarcinoma	5				community57	3
intrahepatic cholangiocarcinoma	5				community75	3
islet cell tumor	5				community67	2
liposarcoma	5				community78	2
lung carcinoma	5				community81	2
malignant mesothelioma	5				community69	1
malignant peripheral nerve sheath tumor	5
renal carcinoma	5
rhabdomyosarcoma	5
skin squamous cell carcinoma	5
uveal melanoma	5
acute myelomonocytic leukemia	4
adenoid cystic carcinoma	4
adrenal gland pheochromocytoma	4
atypical teratoid rhabdoid tumor	4
basal cell carcinoma	4
bladder urothelial carcinoma	4
central nervous system lymphoma	4
cervix carcinoma	4
chordoma	4
colon adenocarcinoma	4
diffuse large B-cell lymphoma germinal center B-cell type	4
embryonal rhabdomyosarcoma	4
endocrine gland cancer	4
esophagus adenocarcinoma	4
gastrointestinal stromal tumor	4
high grade glioma	4
leiomyosarcoma	4
myeloproliferative neoplasm	4
nasal type extranodal NK/T-cell lymphoma	4
neuroendocrine tumor	4
rhabdoid cancer	4
testicular cancer	4
thyroid gland anaplastic carcinoma	4
acute megakaryocytic leukemia	3
acute myeloid leukemia with maturation	3
adrenal cortex cancer	3
anaplastic large cell lymphoma	3
angiosarcoma	3
B-cell acute lymphoblastic leukemia	3
blastic plasmacytoid dendritic cell neoplasm	3
breast adenocarcinoma	3
breast secretory carcinoma	3
carcinosarcoma	3
cervical squamous cell carcinoma	3
childhood acute myeloid leukemia	3
childhood leukemia	3
chondrosarcoma	3
choroid plexus carcinoma	3
chronic myeloid leukemia	3
colon carcinoma	3
dedifferentiated liposarcoma	3
embryonal carcinoma	3
erythroleukemia	3
fibrosarcoma of bone	3
gallbladder cancer	3
gallbladder carcinoma	3
gastric adenocarcinoma	3
germ cell cancer	3
head and neck carcinoma	3
Hodgkin's lymphoma	3
invasive ductal carcinoma	3
laryngeal squamous cell carcinoma	3
luminal breast carcinoma A	3
luminal breast carcinoma B	3
lymphoid leukemia	3
mantle cell lymphoma	3
monocytic leukemia	3
myelodysplastic syndrome	3
myeloid neoplasm	3
myxoid liposarcoma	3
neuroectodermal tumor	3
neurofibroma	3
non-Hodgkin lymphoma	3
ocular melanoma	3
oligodendroglioma	3
ovarian serous carcinoma	3
parathyroid carcinoma	3
peripheral nervous system neoplasm	3
pituitary cancer	3
primary cutaneous T-cell non-Hodgkin lymphoma	3
skin melanoma	3
spindle cell sarcoma	3
supratentorial ependymoma	3
T-cell large granular lymphocyte leukemia	3
T-cell prolymphocytic leukemia	3
teratocarcinoma	3
thymoma	3
thymus lymphoma	3
thyroid gland carcinoma	3
tongue cancer	3
tongue carcinoma	3
transitional cell carcinoma	3
uterine cancer	3
acral lentiginous melanoma	2
acute monocytic leukemia	2
adult T-cell leukemia/lymphoma	2
alveolar rhabdomyosarcoma	2
anal squamous cell carcinoma	2
anaplastic astrocytoma	2
anaplastic ependymoma	2
atypical chronic myeloid leukemia, BCR-ABL1 negative	2
bone sarcoma	2
breast ductal carcinoma	2
bronchus carcinoma	2
central nervous system cancer	2
childhood acute lymphocytic leukemia	2
childhood lymphoma	2
childhood medulloblastoma	2
childhood osteosarcoma	2
chronic myelomonocytic leukemia	2
clear cell adenocarcinoma	2
clear cell sarcoma	2
colorectal adenocarcinoma	2
congenital fibrosarcoma	2
congenital mesoblastic nephroma	2
desmoplastic small round cell tumor	2
differentiated thyroid gland carcinoma	2
endometrial stromal sarcoma	2
endometrioid ovary carcinoma	2
epithelioid sarcoma	2
esophageal carcinoma	2
gestational trophoblastic neoplasm	2
gliosarcoma	2
hypopharynx cancer	2
inflammatory breast carcinoma	2
inflammatory myofibroblastic tumor	2
intestinal cancer	2
invasive lobular carcinoma	2
juvenile myelomonocytic leukemia	2
Kaposi's sarcoma	2
Klatskin's tumor	2
large cell neuroendocrine carcinoma	2
liver carcinoma	2
low grade glioma	2
lung oat cell carcinoma	2
lymphoepithelioma-like carcinoma	2
male breast cancer	2
malignant conjunctival melanoma	2
malignant fibrous histiocytoma	2
malignant pleural mesothelioma	2
MALT lymphoma	2
mature B-cell neoplasm	2
melanoma in congenital melanocytic nevus	2
Merkel cell carcinoma	2
mixed oligodendroglioma-astrocytoma	2
mucoepidermoid carcinoma	2
mucosal melanoma	2
mycosis fungoides	2
myelofibrosis	2
neuroendocrine carcinoma	2
NUT midline carcinoma	2
ovary adenocarcinoma	2
pancreatic adenocarcinoma	2
pancreatic ductal carcinoma	2
papillary carcinoma	2
papillary renal cell carcinoma	2
penile cancer	2
plasma cell neoplasm	2
plasmablastic lymphoma	2
plasmacytoma	2
prolymphocytic leukemia	2
reticulosarcoma	2
salivary gland carcinoma	2
sebaceous carcinoma	2
seminoma	2
skin carcinoma	2
small cell carcinoma	2
sporadic breast cancer	2
superficial urinary bladder cancer	2
supraglottis squamous cell carcinoma	2
teratoma	2
thymic carcinoma	2
thymus cancer	2
thyroid gland follicular carcinoma	2
thyroid gland medullary carcinoma	2
uterine carcinosarcoma	2
uterine corpus endometrial carcinoma	2
uterine corpus sarcoma	2
well-differentiated liposarcoma	2
acinar cell carcinoma	1
acute basophilic leukemia	1
acute biphenotypic leukemia	1
adenosarcoma	1
adrenal gland cancer	1
adrenocortical carcinoma	1
adult acute lymphocytic leukemia	1
aggressive NK-cell leukemia	1
alveolar soft part sarcoma	1
ampulla of Vater carcinoma	1
anaplastic pleomorphic xanthoastrocytoma	1
appendix adenocarcinoma	1
atypical neurofibroma	1
B-cell prolymphocytic leukemia	1
Barrett's adenocarcinoma	1
biliary tract cancer	1
bladder squamous cell carcinoma	1
bone lymphoma	1
bone marrow cancer	1
brain stem glioma	1
central nervous system embryonal tumor	1
cerebellum cancer	1
cerebral primitive neuroectodermal tumor	1
cervical adenocarcinoma	1
choriocarcinoma	1
choroid plexus cancer	1
chromophobe renal cell carcinoma	1
chronic eosinophilic leukemia	1
chronic leukemia	1
collecting duct carcinoma	1
composite lymphoma	1
conjunctival cancer	1
dedifferentiated chondrosarcoma	1
diffuse gastric cancer	1
diffuse midline glioma, H3 K27M-mutant	1
embryonal cancer	1
embryonal testis carcinoma	1
endometrial adenocarcinoma	1
endometrial clear cell adenocarcinoma	1
endometrial serous adenocarcinoma	1
endometrial squamous cell carcinoma	1
endometrial stromal tumor	1
essential thrombocythemia	1
fallopian tube cancer	1
familial medullary thyroid carcinoma	1
familial melanoma	1
familial retinoblastoma	1
female reproductive organ cancer	1
fibrolamellar carcinoma	1
fibrous meningioma	1
follicular lymphoma	1
gastrinoma	1
gastroesophageal cancer	1
glomangiosarcoma	1
hairy cell leukemia	1
HCL-V	1
heart cancer	1
hemangiopericytoma	1
hereditary diffuse gastric cancer	1
hereditary renal cell carcinoma	1
high grade ependymoma	1
histiocytic sarcoma	1
Hodgkin's lymphoma, nodular sclerosis	1
hormone producing pituitary cancer	1
interdigitating dendritic cell sarcoma	1
intracranial meningioma	1
keratoacanthoma	1
kidney clear cell sarcoma	1
large cell carcinoma	1
laryngeal carcinoma	1
larynx cancer	1
lip cancer	1
liver angiosarcoma	1
liver lymphoma	1
lung giant cell carcinoma	1
lung large cell carcinoma	1
lung papillary adenocarcinoma	1
lymphoblastic lymphoma	1
malignant olfactory nerve neoplasm	1
malignant ovarian germ cell neoplasm	1
malignant pheochromocytoma	1
mammary analogue secretory carcinoma	1
mammary Paget's disease	1
marginal zone B-cell lymphoma	1
maxillary sinus squamous cell carcinoma	1
mediastinal malignant lymphoma	1
medullomyoblastoma	1
melanomatosis	1
meningeal melanoma	1
meningothelial meningioma	1
mesenchymal cell neoplasm	1
mixed cell type cancer	1
mixed-type liposarcoma	1
mucinous adenocarcinoma	1
muscle cancer	1
myelodysplastic/myeloproliferative neoplasm	1
myxoid chondrosarcoma	1
nervous system cancer	1
nodular malignant melanoma	1
nonpapillary renal cell carcinoma	1
ocular cancer	1
oral cavity cancer	1
oropharynx cancer	1
ovarian carcinosarcoma	1
ovarian clear cell adenocarcinoma	1
ovarian clear cell carcinoma	1
ovarian mucinous neoplasm	1
ovarian serous cystadenocarcinoma	1
ovary epithelial cancer	1
ovary serous adenocarcinoma	1
pancreatic intraductal papillary-colloid carcinoma	1
penis carcinoma	1
peripheral nerve sheath neoplasm	1
peritoneal mesothelioma	1
perivascular epithelioid cell tumor	1
pineal gland cancer	1
pituitary carcinoma	1
plasma cell leukemia	1
pleomorphic liposarcoma	1
polycythemia vera	1
posterior uveal melanoma	1
rectum cancer	1
retinal cancer	1
Richter's syndrome	1
salivary gland adenoid cystic carcinoma	1
salivary gland cancer	1
serous cystadenocarcinoma	1
Sertoli-Leydig cell tumor	1
Sezary's disease	1
signet ring cell adenocarcinoma	1
small intestine adenocarcinoma	1
small-cell carcinoma of the ovary of hypercalcemic type	1
spinal cancer	1
spinal chordoma	1
spinal cord ependymoma	1
spitzoid melanoma	1
splenic marginal zone lymphoma	1
synovial sarcoma	1
T-cell adult acute lymphocytic leukemia	1
tongue squamous cell carcinoma	1
tonsil cancer	1
unilateral retinoblastoma	1
uterine corpus cancer	1
uterus leiomyosarcoma	1
vulva cancer	1
