# Supplementary material
Source: Research Square preprint supplement (doi:10.21203/rs.3.rs-8894562/v1)
Supplement: Supplementary file 6 [file 9424f219c5c786c7c5fabadc.xlsx]

## Sheet: TF pairs derived from ChIP-seq
TF-pair	orientation	sample size	Constrained spacing	Spacing type	KS-test
RFX2_RFX5	++	289	-22(0.0)|-16(0.0)|-15(0.0)|16(0.0)	Constrained spacing	1.31176e-10
FOXA3_KLF4	-+	437	-29(0.0)|-23(0.0)|18(0.0)	Constrained spacing	1.3905e-09
KLF8_SOX9	--	248	-95(0.0)|-94(0.0)|-93(0.0)|-80(0.0)|-76(0.0)|-75(0.0)|-74(0.0)|-73(0.0)|-72(0.0)|-71(0.0)|-25(0.0)	Constrained spacing	4.3552e-08
GATA2_RREB1	--	123	-82(0.0)	Constrained spacing	5.52915e-08
IRF1_PRDM1	++	327	0(0.0)	Constrained spacing	8.27432e-08
SPIB_SPIC	-+	408	-1(0.0)	Constrained spacing	9.89132e-08
RFX1_RFX2	+-	247	-16(0.0)|0(0.0)|16(0.0)	Constrained spacing	4.07707e-07		Overlap with PPI data
EGR3_ZNF263	++	104	-81(0.0)|-69(0.0)|-63(0.0)|-62(0.0)|-61(0.0)|-60(0.0)|-59(0.0)|-58(0.0)|-57(0.0)|-56(0.0)|-55(0.0)|-54(0.0)|-53(0.0)|-52(0.0)|-51(0.0)|-50(0.0)|-49(0.0)|-48(0.0)|-47(0.0)|-46(0.0)|-45(0.0)|-44(0.0)|-43(0.0)|-42(0.0)|-41(0.0)|-40(0.0)|-39(0.0)|-38(0.0)|-37	Constrained spacing	5.22046e-07
KLF8_SOX17	-+	298	-91(0.0)	Constrained spacing	9.05599e-07
ETV7_SPI1	++	451	2(0.0)|3(0.0)	Constrained spacing	1.86496e-06
ERG_GABPA	-+	425	-8(0.0)	Constrained spacing	2.27789e-06
KLF8_RXRA	++	39	61(0.0)|62(0.0)|63(0.0)|64(0.0)|65(0.0)|66(0.0)|67(0.0)|68(0.0)|69(0.0)|70(0.0)|71(0.0)|72(0.0)|73(0.0)|74(0.0)|75(0.0)|76(0.0)|77(0.0)|78(0.0)	Constrained spacing	3.03331e-06
ELF3_ZNF263	+-	821	1(0.0)|2(0.0)|3(0.0)|4(0.0)	Constrained spacing	4.87855e-06
HOXB2_KLF8	--	106	45(0.0)|46(0.0)|47(0.0)	Constrained spacing	5.01249e-06
RFX2_RFX3	-+	192	-16(0.0)|-15(0.0)|-10(0.0)|16(0.0)	Constrained spacing	6.27623e-06		Overlap with PPI data
FOXJ2_KLF4	-+	913	-42(0.0)|-36(0.0)|4(0.0)	Constrained spacing	7.53252e-06
FOXL1_IRF1	+-	94	80(0.0)|81(0.0)|86(0.0)|87(0.0)|96(0.0)|97(0.0)|98(0.0)	Constrained spacing	8.30204e-06
RFX1_RFX5	-+	137	-22(0.0)|-16(0.0)|-15(0.0)|16(0.0)	Constrained spacing	9.86214e-06
FOXA3_KLF8	--	76	60(0.0)|61(0.0)|62(0.0)|69(0.0)|70(0.0)|71(0.0)|76(0.0)|77(0.0)|78(0.0)|79(0.0)|80(0.0)|84(0.0)|85(0.0)|86(0.0)|87(0.0)|88(0.0)|89(0.0)|90(0.0)|91(0.0)|95(0.0)	Constrained spacing	1.028e-05
KLF10_SPI1	+-	140	58(0.0)|59(0.0)|68(0.0)|78(0.0)|79(0.0)|80(0.0)|81(0.0)|82(0.0)	Constrained spacing	1.12947e-05
RFX3_RFX5	--	140	-16(0.0)|-15(0.0)|15(0.0)|16(0.0)|22(0.0)	Constrained spacing	1.27788e-05		Overlap with PPI data
KLF8_TLX2	--	55	31(0.0)|32(0.0)|33(0.0)|57(0.0)|81(0.0)|82(0.0)|83(0.0)	Constrained spacing	1.44198e-05
FIGLA_KLF8	+-	151	-91(0.0)	Constrained spacing	1.68181e-05
KLF8_LHX2	--	35	38(0.0)|39(0.0)|40(0.0)|41(0.0)|42(0.0)|43(0.0)|47(0.0)|48(0.0)|49(0.0)|50(0.0)|54(0.0)|55(0.0)|56(0.0)|57(0.0)|58(0.0)|59(0.0)	Constrained spacing	1.77894e-05
EGR3_RREB1	+-	112	-51(0.0)|-14(0.0)|-13(0.0)	Constrained spacing	5.83819e-05
KLF10_KLF4	+-	19035	nan	Relaxed spacing	8.46361e-105
KLF4_KLF5	--	18793	nan	Relaxed spacing	1.08794e-86
KLF6_KLF8	+-	5147	nan	Relaxed spacing	5.02333e-63
KLF10_KLF5	-+	13132	nan	Relaxed spacing	2.07183e-53
KLF8_ZNF263	--	6473	nan	Relaxed spacing	3.73903e-36
KLF8_SP7	--	3826	nan	Relaxed spacing	7.05327e-33
KLF8_SPI1	-+	362	nan	Relaxed spacing	6.67402e-29
KLF10_RREB1	+-	5305	nan	Relaxed spacing	6.57266e-27
KLF4_ZNF263	-+	11376	nan	Relaxed spacing	3.266e-26
KLF4_TFAP2A	+-	10048	nan	Relaxed spacing	1.4485e-24
KLF8_SKIL	-+	1834	nan	Relaxed spacing	6.76511e-23
KLF8_RREB1	--	5256	nan	Relaxed spacing	5.44951e-21		Overlap with PPI data
KLF5_ZNF263	+-	7521	nan	Relaxed spacing	3.22826e-19
KLF8_NFKB1	-+	2387	nan	Relaxed spacing	2.23356e-17
ELF4_FLI1	--	1443	nan	Relaxed spacing	7.3718e-17
KLF4_RREB1	--	8471	nan	Relaxed spacing	2.67793e-16
ELF1_ELF4	--	1495	nan	Relaxed spacing	6.66863e-16
IRF1_KLF8	+-	757	nan	Relaxed spacing	5.72968e-15
ETV3_FLI1	--	1209	nan	Relaxed spacing	1.42611e-14
ELF1_ELF2	--	1168	nan	Relaxed spacing	2.66945e-14		Overlap with PPI data
HNF1A_HNF1B	-+	2179	nan	Relaxed spacing	6.24652e-14
NFIC_NFIX	--	1106	nan	Relaxed spacing	6.68302e-14		Overlap with PPI data
KLF10_KLF6	-+	3377	nan	Relaxed spacing	7.14705e-14
ELF4_ETV3	--	1029	nan	Relaxed spacing	2.75768e-13
ELF1_FLI1	--	1492	nan	Relaxed spacing	5.14832e-13
ETV7_KLF8	--	2597	nan	Relaxed spacing	9.69675e-13
ELF2_ELF4	--	1096	nan	Relaxed spacing	1.68911e-12
FLI1_GABPA	+-	790	nan	Relaxed spacing	2.38641e-12
ERG_FLI1	--	948	nan	Relaxed spacing	2.76769e-12		Overlap with PPI data
KLF5_TFAP2A	--	7731	nan	Relaxed spacing	1.47661e-11
ELF4_ETV7	--	1231	nan	Relaxed spacing	1.7933e-11
ETV7_FLI1	--	1293	nan	Relaxed spacing	3.12912e-11
KLF5_RREB1	--	5415	nan	Relaxed spacing	4.52095e-11
RREB1_TFAP2A	--	3247	nan	Relaxed spacing	1.10146e-10
KLF8_TFAP2A	+-	7877	nan	Relaxed spacing	2.34861e-10
ELF2_FLI1	--	1156	nan	Relaxed spacing	2.38738e-10
ETV3_GABPA	-+	609	nan	Relaxed spacing	4.69443e-10		Overlap with PPI data
EGR3_KLF10	+-	584	nan	Relaxed spacing	5.97504e-10
MAX_RREB1	+-	899	nan	Relaxed spacing	6.1864e-10		Overlap with PPI data
ELF1_ETV3	--	1047	nan	Relaxed spacing	6.71468e-10
ELK1_FLI1	--	931	nan	Relaxed spacing	1.03313e-09
ELF2_GABPA	-+	578	nan	Relaxed spacing	1.56971e-09		Overlap with PPI data
ELF2_KLF8	-+	1302	nan	Relaxed spacing	1.89538e-09
TFAP2A_ZNF263	+-	5418	nan	Relaxed spacing	2.2779e-09
TEAD1_TEAD4	++	686	nan	Relaxed spacing	2.66155e-09		Overlap with PPI data
ELF4_GABPA	-+	669	nan	Relaxed spacing	2.90358e-09		Overlap with PPI data
KLF6_RREB1	--	1219	nan	Relaxed spacing	3.88532e-09
ERF_FLI1	--	808	nan	Relaxed spacing	4.8226e-09
ELF1_ETV7	--	1194	nan	Relaxed spacing	5.4938e-09
KLF4_KLF6	++	3338	nan	Relaxed spacing	5.65849e-09
ETV5_FLI1	--	844	nan	Relaxed spacing	6.23069e-09
ETV7_GABPA	-+	541	nan	Relaxed spacing	7.42867e-09
ELF1_KLF8	-+	1910	nan	Relaxed spacing	9.3386e-09
ELF4_ERG	++	797	nan	Relaxed spacing	1.1289e-08
ELF1_GABPA	-+	684	nan	Relaxed spacing	1.28425e-08		Overlap with PPI data
KLF8_MAX	--	1526	nan	Relaxed spacing	1.49144e-08		Overlap with PPI data
ETV2_FLI1	-+	634	nan	Relaxed spacing	1.72135e-08		Overlap with PPI data
ELF2_ETV7	--	1086	nan	Relaxed spacing	2.39942e-08
KLF8_PDX1	-+	153	nan	Relaxed spacing	4.5562e-08
ELF4_RREB1	++	972	nan	Relaxed spacing	6.99983e-08
ELF2_SPI1	++	750	nan	Relaxed spacing	7.68378e-08
ERG_ETV7	++	807	nan	Relaxed spacing	8.78249e-08
ELF4_ELK1	--	763	nan	Relaxed spacing	8.89803e-08
ETV3_ETV7	--	864	nan	Relaxed spacing	1.19828e-07
ERG_ETV3	+-	567	nan	Relaxed spacing	1.59912e-07
KLF5_KLF6	++	2879	nan	Relaxed spacing	1.72572e-07
ELK1_KLF5	-+	1398	nan	Relaxed spacing	1.78552e-07
HOXA11_RREB1	--	150	nan	Relaxed spacing	1.90058e-07		Overlap with PPI data
ERG_ETV2	++	729	nan	Relaxed spacing	2.13635e-07
ETV7_ZNF263	--	2468	nan	Relaxed spacing	2.70615e-07
DPRX_KLF8	++	363	nan	Relaxed spacing	3.10638e-07
ELK1_ETV3	--	751	nan	Relaxed spacing	3.21368e-07
ELF2_ETV3	--	832	nan	Relaxed spacing	3.29407e-07
ETV3_RREB1	++	779	nan	Relaxed spacing	3.38935e-07
SPI1_SPIB	-+	458	nan	Relaxed spacing	4.00749e-07
ELF4_ETV2	++	738	nan	Relaxed spacing	4.2607e-07
ETV3_ETV5	--	604	nan	Relaxed spacing	4.66e-07
ETV4_FLI1	--	712	nan	Relaxed spacing	4.94468e-07		Overlap with PPI data
ELF4_ETV5	--	695	nan	Relaxed spacing	5.41433e-07
IRF1_RREB1	--	333	nan	Relaxed spacing	5.60092e-07
ELF1_ELK1	--	740	nan	Relaxed spacing	6.12197e-07
KLF8_NFIX	--	526	nan	Relaxed spacing	6.53556e-07
KLF8_NFYC	++	683	nan	Relaxed spacing	6.88208e-07
NFIB_NFIX	--	681	nan	Relaxed spacing	6.95823e-07		Overlap with PPI data
SKIL_ZNF263	-+	1648	nan	Relaxed spacing	7.08383e-07
KLF10_ZNF263	--	5472	nan	Relaxed spacing	8.09244e-07
ELF1_ERF	--	647	nan	Relaxed spacing	8.53349e-07
ELF4_ERF	--	617	nan	Relaxed spacing	8.71735e-07
KLF10_TFAP2A	+-	6237	nan	Relaxed spacing	9.08052e-07
ERF_ETV3	--	598	nan	Relaxed spacing	9.56787e-07
ELK1_GABPA	-+	522	nan	Relaxed spacing	1.12186e-06
SPI1_SPIC	--	548	nan	Relaxed spacing	1.14829e-06
ELF1_ERG	++	835	nan	Relaxed spacing	1.17145e-06
KLF8_YY1	+-	434	nan	Relaxed spacing	1.28807e-06		Overlap with PPI data
KLF4_MAX	++	2792	nan	Relaxed spacing	1.52085e-06
ERG_ETV5	--	660	nan	Relaxed spacing	1.52417e-06
KLF5_MAX	++	2212	nan	Relaxed spacing	1.84965e-06
ETV7_KLF5	-+	2603	nan	Relaxed spacing	1.92241e-06
KLF8_TBXT	-+	413	nan	Relaxed spacing	2.0608e-06
ELK4_FLI1	-+	807	nan	Relaxed spacing	2.08654e-06
ELK4_ERG	-+	665	nan	Relaxed spacing	2.24203e-06
ELF4_KLF8	-+	2045	nan	Relaxed spacing	2.61974e-06
KLF10_NFYC	-+	641	nan	Relaxed spacing	3.21317e-06
SPI1_ZNF263	++	854	nan	Relaxed spacing	3.82757e-06
GATA3_MAX	++	281	nan	Relaxed spacing	5.91418e-06
ETV2_ETV3	-+	445	nan	Relaxed spacing	6.016e-06
ELF4_ETV4	--	639	nan	Relaxed spacing	6.04669e-06
ELK1_ETV7	--	616	nan	Relaxed spacing	6.53636e-06
FLI1_KLF5	-+	2814	nan	Relaxed spacing	6.70524e-06
ELF2_ERG	++	738	nan	Relaxed spacing	7.15975e-06
ERF_GABPA	-+	376	nan	Relaxed spacing	7.29568e-06
ELF4_SPIC	--	444	nan	Relaxed spacing	7.69848e-06
BHLHA15_FIGLA	++	664	nan	Relaxed spacing	7.81488e-06
ERG_ETV4	++	475	nan	Relaxed spacing	8.93061e-06
GLI3-CL_KLF8	-+	2209	nan	Relaxed spacing	9.23912e-06
ETV2_ETV7	--	716	nan	Relaxed spacing	9.60098e-06
GLI3-FL_KLF8	-+	804	nan	Relaxed spacing	9.95449e-06
ELK1_ERG	++	530	nan	Relaxed spacing	1.0769e-05
FLI1_KLF8	++	2591	nan	Relaxed spacing	1.09946e-05
ETV3_ETV4	--	542	nan	Relaxed spacing	1.21629e-05
ELF5_FLI1	--	637	nan	Relaxed spacing	1.24954e-05
ELF1_ETV4	--	664	nan	Relaxed spacing	1.37236e-05
ERF_ETV7	--	590	nan	Relaxed spacing	1.37876e-05
ETS1_ETV2	++	600	nan	Relaxed spacing	1.38659e-05
GABPA_KLF5	+-	773	nan	Relaxed spacing	1.39122e-05
GATA2_GATA4	++	811	nan	Relaxed spacing	1.42036e-05
ELF1_SPIC	--	561	nan	Relaxed spacing	1.58152e-05
ETV5_GABPA	-+	388	nan	Relaxed spacing	1.69964e-05
ERF_ERG	++	481	nan	Relaxed spacing	1.88693e-05
ELF1_ETV5	++	742	nan	Relaxed spacing	1.89622e-05
ELK1_ETV5	--	483	nan	Relaxed spacing	1.97896e-05
ELF1_ETV2	++	769	nan	Relaxed spacing	2.08627e-05
ELF1_RREB1	++	892	nan	Relaxed spacing	2.46125e-05		Overlap with PPI data
EHF_ELF4	+-	434	nan	Relaxed spacing	2.50618e-05
ETV2_GABPA	+-	383	nan	Relaxed spacing	2.76339e-05
ELF2_ELK1	--	639	nan	Relaxed spacing	2.88397e-05
KLF8_NFIC	--	374	nan	Relaxed spacing	2.92134e-05
NFIA_NFIX	--	390	nan	Relaxed spacing	2.98771e-05		Overlap with PPI data
NFIB_NFIC	--	397	nan	Relaxed spacing	3.13469e-05		Overlap with PPI data
ETV4_GABPA	-+	348	nan	Relaxed spacing	3.14969e-05
KLF4_NFKB1	+-	3010	nan	Relaxed spacing	3.18486e-05
HOXA10_HOXB13	++	960	nan	Relaxed spacing	3.29666e-05
ELK4_ETV4	-+	500	nan	Relaxed spacing	3.32516e-05
ELK4_ETV3	-+	623	nan	Relaxed spacing	3.44845e-05
ERF_RREB1	-+	389	nan	Relaxed spacing	3.4994e-05
ETV4_ETV7	--	592	nan	Relaxed spacing	3.55702e-05
ELF2_ETV2	--	561	nan	Relaxed spacing	3.60344e-05
EHF_ELF1	+-	453	nan	Relaxed spacing	3.67987e-05
ELK4_ETV5	-+	754	nan	Relaxed spacing	3.73305e-05
KLF8_SPIB	+-	558	nan	Relaxed spacing	3.83469e-05
ELF2_ERF	--	526	nan	Relaxed spacing	3.85915e-05
ELF2_RREB1	--	682	nan	Relaxed spacing	4.16577e-05		Overlap with PPI data
ELF4_ELK4	+-	734	nan	Relaxed spacing	4.36638e-05
ELK1_ERF	--	496	nan	Relaxed spacing	4.54286e-05
GLI3-CL_KLF10	-+	1634	nan	Relaxed spacing	4.89361e-05
NFKB1_RREB1	-+	1259	nan	Relaxed spacing	5.48642e-05
EHF_KLF8	-+	884	nan	Relaxed spacing	5.72304e-05
FLI1_ZNF263	--	1800	nan	Relaxed spacing	5.98586e-05
ELK4_HOXB13	+-	52	nan	Relaxed spacing	6.07355e-05

## Sheet: ChIPseq_PPI_23
ChIP-seq_PPI overlapped TF pairs	PPI Methods
NFIB_NFIC	AP-MS and BioID
NFIB_NFIX	AP-MS and BioID
NFIC_NFIX	AP-MS and BioID
RFX1_RFX2	AP-MS and BioID
RFX2_RFX3	AP-MS and BioID
NFIA_NFIX	AP-MS and BioID
ETV2_FLI1	BioID
KLF8_YY1	BioID
KLF8_MAX	BioID
KLF8_RREB1	BioID
ERG_FLI1	BioID
TEAD1_TEAD4	AP-MS
HOXA11_RREB1	BioID
ELF1_GABPA	BioID
ELF1_ELF2	BioID
ELF1_RREB1	BioID
ETV3_GABPA	BioID
ETV4_FLI1	BioID
RFX3_RFX5	BioID
MAX_RREB1	BioID
ELF2_GABPA	BioID
ELF2_RREB1	BioID
ELF4_GABPA	BioID

## Sheet: 2015 Jolma etal Nature TF_pairs
CAP-SELEX TF pair overlap with our PPI				CAP-SELEX TF pair overlap with our ChIP-seq TF pairs
ETV2_RFX5	BioID	concordant		TF-pair	orientation	sample size	Constrained spacing	Spacing type	KS-test
FOXJ2_ELF1	BioID	concordant		ETV7_FLI1	--	1293	nan	Relaxed spacing	3.12912e-11
GCM2_PITX1	BioID	concordant		ELK1_ETV7	--	616	nan	Relaxed spacing	6.53636e-06
HOXB2_RFX5	BioID	concordant		ETV2_ETV7	--	716	nan	Relaxed spacing	9.60098e-06
HOXB2_TBX3	BioID	concordant		ERF_ETV7	--	590	nan	Relaxed spacing	1.37876e-05
TFAP4_FLI1	BioID	concordant
SOX15_CUX1	BioID	discordant
TBX21_CUX1	BioID	discordant
ONECUT2_E2F3	BioID	discordant
DLX3_ERF	BioID	discordant
HOXA3_ERF	BioID	discordant
ONECUT2_ERF	BioID	discordant
TBX21_ERF	BioID	discordant
BHLHA15_FLI1	BioID	discordant
ONECUT2_FLI1	BioID	discordant
TCF3_FLI1	BioID	discordant
HOXA3_PITX1	BioID	discordant
SOX15_POU2F1	BioID	discordant
SOX2_POU2F1	BioID	discordant
DLX3_TFAP4	BioID	discordant
