# Supplementary material
Source: Research Square preprint supplement (doi:10.21203/rs.3.rs-8894562/v1)
Supplement: Supplementary file 7 [file eefad9f64890813d9d82ca28.xlsx]

## Sheet: HEK 293 TF PPI info.
Bait	Methods	BaitID	Prey	BaitorPrey	PPIs	Prey Gene Name (primary)	Prey Protein Names	Prey Gene Names	Protein Length	GO (biological process)	GO (cellular.component)	GO(molecular function)	Spec	SpecSum	AvgSpec	NumReplicates	ctrlCounts	AvgP	MaxP	TopoAvgP	TopoMaxP	SaintScore	logOddsScore	FoldChange	BFDR	Author	Crapome Num.of.Expt...found.total.	Crapome Average Spectral Count	Crapome Max Spectral Count	Crapome found	Known interaction	source_database	publication_identifier	confidence_value
E2F3	BioID	O00716	P08047	Prey	O00716_P08047	SP1	Transcription factor Sp1	SP1 TSFP1	785	cellular response to estrogen stimulus [GO:0071391]; cellular response to insulin stimulus [GO:0032869]; cellular response to wortmannin [GO:1904568]; cellular response to zinc ion starvation [GO:0034224]; positive regulation by host of viral transcription [GO:0043923]; positive regulation of amyloid-beta formation [GO:1902004]; positive regulation of angiogenesis [GO:0045766]; positive regulatio…	chromatin [GO:0000785]; cytoplasm [GO:0005737]; euchromatin [GO:0000791]; nucleoplasm [GO:0005654]; nucleus [GO:0005634]; protein-DNA complex [GO:0032993]; transcription repressor complex [GO:0017053]	bHLH transcription factor binding [GO:0043425]; DNA binding [GO:0003677]; DNA-binding transcription activator activity, RNA polymerase II-specific [GO:0001228]; DNA-binding transcription factor activity [GO:0003700]; DNA-binding transcription factor activity, RNA polymerase II-specific [GO:0000981]; double-stranded DNA binding [GO:0003690]; histone acetyltransferase binding [GO:0035035]; histone …	5|3	8	4	2	0|0|0|0|0|0|0|0|0|0	1	1	1	1	1	5.28	40	0	Tan	21 / 716	1.9	6	21	TRUE	IntAct	doi:10.1038/emboj.2011.451|pubmed:22157815|imex:IM-20874|mint:MINT-8376005|doi:10.1038/emboj.2011.451|pubmed:22157815|imex:IM-20874|mint:MINT-8376005	intact-miscore:0.35|intact-miscore:0.35
E2F3	BioID	O00716	P35221	Prey	O00716_P35221	CTNNA1	Catenin alpha-1 (Alpha E-catenin) (Cadherin-associated protein) (Renal carcinoma antigen NY-REN-13)	CTNNA1	906	apical junction assembly [GO:0043297]; axon regeneration [GO:0031103]; cell adhesion [GO:0007155]; cell migration [GO:0016477]; cell-cell adhesion [GO:0098609]; cellular response to indole-3-methanol [GO:0071681]; epithelial cell-cell adhesion [GO:0090136]; establishment or maintenance of cell polarity [GO:0007163]; extrinsic apoptotic signaling pathway in absence of ligand [GO:0097192]; gap junc…	acrosomal vesicle [GO:0001669]; actin cytoskeleton [GO:0015629]; adherens junction [GO:0005912]; catenin complex [GO:0016342]; cell junction [GO:0030054]; cell-cell junction [GO:0005911]; cytosol [GO:0005829]; flotillin complex [GO:0016600]; focal adhesion [GO:0005925]; intercalated disc [GO:0014704]; intracellular membrane-bounded organelle [GO:0043231]; lamellipodium [GO:0030027]; plasma membra…	actin filament binding [GO:0051015]; beta-catenin binding [GO:0008013]; cadherin binding [GO:0045296]; gamma-catenin binding [GO:0045295]; identical protein binding [GO:0042802]; RNA binding [GO:0003723]; structural molecule activity [GO:0005198]; vinculin binding [GO:0017166]	12|18	30	15	2	0|6|0|0|0|1|0|2|2|4	0.99	1	0.99	1	0.99	3.82	10	0	Tan	114 / 716	3.5	48	114	TRUE	IntAct	doi:10.1038/emboj.2011.451|pubmed:22157815|imex:IM-20874|mint:MINT-8376005	intact-miscore:0.35
E2F3	BioID	O00716	P46977	Prey	O00716_P46977	STT3A	Dolichyl-diphosphooligosaccharide--protein glycosyltransferase subunit STT3A (Oligosaccharyl transferase subunit STT3A) (STT3-A) (EC 2.4.99.18) (B5) (Integral membrane protein 1) (Transmembrane protein TMC)	STT3A ITM1 TMC	705	co-translational protein modification [GO:0043686]; post-translational protein modification [GO:0043687]; protein N-linked glycosylation [GO:0006487]; protein N-linked glycosylation via asparagine [GO:0018279]	endoplasmic reticulum membrane [GO:0005789]; membrane [GO:0016020]; oligosaccharyltransferase complex [GO:0008250]; oligosaccharyltransferase III complex [GO:0035000]	dolichyl-diphosphooligosaccharide-protein glycotransferase activity [GO:0004579]; metal ion binding [GO:0046872]	4|8	12	6	2	0|0|0|0|0|0|0|0|2|1	0.99	1	0.99	1	0.99	3.7	20	0	Tan	119 / 716	2	10	119	TRUE	IntAct	doi:10.1038/emboj.2011.451|pubmed:22157815|imex:IM-20874|mint:MINT-8376005	intact-miscore:0.35
E2F3	BioID	O00716	P54098	Prey	O00716_P54098	POLG	DNA polymerase subunit gamma-1 (EC 2.7.7.7) (Mitochondrial DNA polymerase catalytic subunit) (PolG-alpha)	POLG MDP1 POLG1 POLGA	1239	base-excision repair, gap-filling [GO:0006287]; DNA metabolic process [GO:0006259]; DNA-templated DNA replication [GO:0006261]; mitochondrial DNA replication [GO:0006264]	gamma DNA polymerase complex [GO:0005760]; intracellular membrane-bounded organelle [GO:0043231]; mitochondrial matrix [GO:0005759]; mitochondrial nucleoid [GO:0042645]; mitochondrion [GO:0005739]; protein-containing complex [GO:0032991]	3'-5' exonuclease activity [GO:0008408]; chromatin binding [GO:0003682]; DNA binding [GO:0003677]; DNA-directed DNA polymerase activity [GO:0003887]; protease binding [GO:0002020]	5|4	9	4.5	2	0|0|0|0|0|0|0|0|0|0	1	1	1	1	1	7.02	45	0	Tan	1 / 716	1	1	1	TRUE	IntAct	doi:10.1038/emboj.2011.451|pubmed:22157815|imex:IM-20874|mint:MINT-8376005	intact-miscore:0.35
E2F3	BioID	O00716	Q14186	Prey	O00716_Q14186	TFDP1	Transcription factor Dp-1 (DRTF1-polypeptide 1) (DRTF1) (E2F dimerization partner 1)	TFDP1 DP1	410	anoikis [GO:0043276]; epidermis development [GO:0008544]; negative regulation of fat cell proliferation [GO:0070345]; positive regulation of DNA-binding transcription factor activity [GO:0051091]; positive regulation of G1/S transition of mitotic cell cycle [GO:1900087]; positive regulation of transcription by RNA polymerase II [GO:0045944]; regulation of DNA biosynthetic process [GO:2000278]; re…	chromatin [GO:0000785]; cytoplasm [GO:0005737]; cytosol [GO:0005829]; nucleoplasm [GO:0005654]; nucleus [GO:0005634]; Rb-E2F complex [GO:0035189]; RNA polymerase II transcription regulator complex [GO:0090575]	cis-regulatory region sequence-specific DNA binding [GO:0000987]; DNA-binding transcription factor activity [GO:0003700]; DNA-binding transcription factor activity, RNA polymerase II-specific [GO:0000981]; DNA-binding transcription factor binding [GO:0140297]; protein domain specific binding [GO:0019904]	32|27	59	29.5	2	11|7|11|5|8|2|4|3|7|9	1	1	1	1	1	8.43	4.4	0	Tan	64 / 716	1.9	5	64	TRUE	IntAct	pubmed:27705803|imex:IM-21659|doi:10.1016/j.celrep.2014.05.050|pubmed:24981860|imex:IM-26985	intact-miscore:0.53|intact-miscore:0.53
E2F3	BioID	O00716	Q16891	Prey	O00716_Q16891	IMMT	MICOS complex subunit MIC60 (Cell proliferation-inducing gene 4/52 protein) (Mitochondrial inner membrane protein) (Mitofilin) (p87/89)	IMMT HMP MIC60 MINOS2 PIG4 PIG52	758	cristae formation [GO:0042407]; inner mitochondrial membrane organization [GO:0007007]; mitochondrial calcium ion homeostasis [GO:0051560]; neuron cellular homeostasis [GO:0070050]	membrane [GO:0016020]; MIB complex [GO:0140275]; MICOS complex [GO:0061617]; mitochondrial crista junction [GO:0044284]; mitochondrial inner membrane [GO:0005743]; mitochondrial intermembrane space [GO:0005758]; mitochondrion [GO:0005739]; SAM complex [GO:0001401]	RNA binding [GO:0003723]	23|20	43	21.5	2	1|4|1|0|0|1|2|4|7|6	1	1	1	1	1	6.25	8.27	0	Tan	93 / 716	3.5	69	93	TRUE	IntAct	doi:10.1038/emboj.2011.451|pubmed:22157815|imex:IM-20874|mint:MINT-8376005|doi:10.1038/emboj.2011.451|pubmed:22157815|imex:IM-20874|mint:MINT-8376005	intact-miscore:0.35|intact-miscore:0.35
E2F3	BioID	O00716	Q7Z460	Prey	O00716_Q7Z460	CLASP1	CLIP-associating protein 1 (Cytoplasmic linker-associated protein 1) (Multiple asters homolog 1) (Protein Orbit homolog 1) (hOrbit1)	CLASP1 KIAA0622 MAST1	1538	astral microtubule organization [GO:0030953]; cell division [GO:0051301]; establishment of epithelial cell polarity [GO:0090162]; establishment of mitotic spindle localization [GO:0040001]; establishment of spindle orientation [GO:0051294]; establishment or maintenance of cell polarity [GO:0007163]; exit from mitosis [GO:0010458]; Golgi organization [GO:0007030]; microtubule anchoring [GO:0034453…	basal cortex [GO:0045180]; cell cortex [GO:0005938]; centrosomal corona [GO:0031592]; centrosome [GO:0005813]; cortical microtubule cytoskeleton [GO:0030981]; cytoplasmic microtubule [GO:0005881]; cytosol [GO:0005829]; Golgi apparatus [GO:0005794]; kinetochore [GO:0000776]; kinetochore microtubule [GO:0005828]; membrane [GO:0016020]; microtubule organizing center [GO:0005815]; microtubule plus-en…	dystroglycan binding [GO:0002162]; kinetochore binding [GO:0043515]; microtubule binding [GO:0008017]; microtubule plus-end binding [GO:0051010]	9|8	17	8.5	2	0|0|1|0|0|0|0|0|0|0	1	1	1	1	1	27.93	85	0	Tan	53 / 716	1.8	5	53	TRUE	IntAct	doi:10.1038/emboj.2011.451|pubmed:22157815|imex:IM-20874|mint:MINT-8376005|doi:10.1038/emboj.2011.451|pubmed:22157815|imex:IM-20874|mint:MINT-8376005|doi:10.1038/emboj.2011.451|pubmed:22157815|imex:IM-20874|mint:MINT-8376005	intact-miscore:0.35|intact-miscore:0.35|intact-miscore:0.35
E2F3	BioID	O00716	Q8IXI1	Prey	O00716_Q8IXI1	RHOT2	Mitochondrial Rho GTPase 2 (MIRO-2) (hMiro-2) (EC 3.6.5.-) (Ras homolog gene family member T2)	RHOT2 ARHT2 C16orf39	618	actin filament organization [GO:0007015]; cellular homeostasis [GO:0019725]; mitochondrial outer membrane permeabilization [GO:0097345]; mitochondrion organization [GO:0007005]; mitochondrion transport along microtubule [GO:0047497]; signal transduction [GO:0007165]; small GTPase mediated signal transduction [GO:0007264]	membrane [GO:0016020]; mitochondrial outer membrane [GO:0005741]; mitochondrion [GO:0005739]	calcium ion binding [GO:0005509]; GTP binding [GO:0005525]; GTPase activity [GO:0003924]	11|14	25	12.5	2	0|2|0|0|0|0|0|0|0|0	1	1	1	1	1	8.84	62.5	0	Tan	27 / 716	1.4	4	27	TRUE	IntAct	doi:10.1038/emboj.2011.451|pubmed:22157815|imex:IM-20874|mint:MINT-8376005	intact-miscore:0.35
E2F3	BioID	O00716	Q9Y3T9	Prey	O00716_Q9Y3T9	NOC2L	Nucleolar complex protein 2 homolog (Protein NOC2 homolog) (NOC2-like protein) (Novel INHAT repressor)	NOC2L NIR	749	apoptotic process [GO:0006915]; cellular response to UV [GO:0034644]; negative regulation of B cell apoptotic process [GO:0002903]; negative regulation of intrinsic apoptotic signaling pathway [GO:2001243]; negative regulation of transcription by RNA polymerase II [GO:0000122]; ribosomal large subunit biogenesis [GO:0042273]; transcription initiation-coupled chromatin remodeling [GO:0045815]	chromosome [GO:0005694]; cytosol [GO:0005829]; Noc1p-Noc2p complex [GO:0030690]; Noc2p-Noc3p complex [GO:0030691]; nucleolus [GO:0005730]; nucleoplasm [GO:0005654]; nucleus [GO:0005634]	chromatin binding [GO:0003682]; DNA-binding transcription factor binding [GO:0140297]; histone binding [GO:0042393]; nucleosome binding [GO:0031491]; RNA binding [GO:0003723]; transcription corepressor activity [GO:0003714]	9|7	16	8	2	0|0|0|0|0|0|0|0|0|0	1	1	1	1	1	11.94	80	0	Tan	86 / 716	2.7	17	86	TRUE	IntAct	doi:10.1038/emboj.2011.451|pubmed:22157815|imex:IM-20874|mint:MINT-8376005|doi:10.1038/emboj.2011.451|pubmed:22157815|imex:IM-20874|mint:MINT-8376005|doi:10.1038/emboj.2011.451|pubmed:22157815|imex:IM-20874|mint:MINT-8376005	intact-miscore:0.35|intact-miscore:0.35|intact-miscore:0.35
ZNF263	BioID	O14978	Q9UBW7	Prey	O14978_Q9UBW7	ZMYM2	Zinc finger MYM-type protein 2 (Fused in myeloproliferative disorders protein) (Rearranged in atypical myeloproliferative disorder protein) (Zinc finger protein 198)	ZMYM2 FIM RAMP ZNF198	1377	negative regulation of DNA-templated transcription [GO:0045892]	cytosol [GO:0005829]; nucleus [GO:0005634]; PML body [GO:0016605]	ubiquitin conjugating enzyme binding [GO:0031624]; zinc ion binding [GO:0008270]	92|89|120|105	406	101.5	4	30|25|29|21|30|11|14|11|9|18|10|9|11|10|10|11|12|8|7|6|19|19|18|20	1	1	1	1	1	12.63	6.62	0	Lisa	87 / 716	7.9	31	87	TRUE	IntAct	pubmed:28514442|doi:10.1038/nature22366|imex:IM-25778	intact-miscore:0.35
CRX	BioID	O43186	P35711	Prey	O43186_P35711	SOX5	Transcription factor SOX-5	SOX5	763	asymmetric neuroblast division [GO:0055059]; cartilage condensation [GO:0001502]; cartilage development [GO:0051216]; cell fate commitment [GO:0045165]; cellular response to transforming growth factor beta stimulus [GO:0071560]; chondrocyte differentiation [GO:0002062]; positive regulation of cartilage development [GO:0061036]; positive regulation of chondrocyte differentiation [GO:0032332]; posi…	chromatin [GO:0000785]; nucleus [GO:0005634]	DNA-binding transcription factor activity [GO:0003700]; DNA-binding transcription factor activity, RNA polymerase II-specific [GO:0000981]; RNA polymerase II cis-regulatory region sequence-specific DNA binding [GO:0000978]; transcription cis-regulatory region binding [GO:0000976]	10|11|10|10	41	10.25	4	0|0|0|0|0|0|0|0|0|0|0|0|0|0|0|0|0|0|0|0|0|0|0|0	1	1	1	1	1	16.02	102.5	0	Lisa	2 / 716	1	1	2	TRUE	IntAct	imex:IM-23318|pubmed:25416956|imex:IM-23318|pubmed:25416956|imex:IM-23318|pubmed:25416956|imex:IM-27438|doi:10.1038/s41467-019-11959-3|pubmed:31515488	intact-miscore:0.67|intact-miscore:0.67|intact-miscore:0.67|intact-miscore:0.67
CRX	BioID	O43186	P54253	Prey	O43186_P54253	ATXN1	Ataxin-1 (Spinocerebellar ataxia type 1 protein)	ATXN1 ATX1 SCA1	815	brain development [GO:0007420]; learning [GO:0007612]; memory [GO:0007613]; negative regulation of DNA-templated transcription [GO:0045892]; negative regulation of transcription by RNA polymerase II [GO:0000122]; nervous system development [GO:0007399]; nuclear export [GO:0051168]; RNA processing [GO:0006396]; social behavior [GO:0035176]	cytoplasm [GO:0005737]; cytosol [GO:0005829]; nuclear inclusion body [GO:0042405]; nuclear matrix [GO:0016363]; nucleolus [GO:0005730]; nucleoplasm [GO:0005654]; nucleus [GO:0005634]	DNA binding [GO:0003677]; identical protein binding [GO:0042802]; poly(G) binding [GO:0034046]; poly(U) RNA binding [GO:0008266]; protein self-association [GO:0043621]	14|14|14|12	54	13.5	4	2|2|0|2|3|2|1|0|3|0|0|0|0|0|0|0|0|0|0|0|2|3|2|3	1	1	1	1	1	8.04	12.96	0	Lisa	2 / 716	1	1	2	TRUE	IntAct	pubmed:32296183|imex:IM-25472|pubmed:32296183|imex:IM-25472|pubmed:32296183|imex:IM-25472	author score:0.862436053805|intact-miscore:0.56|author score:0.862436053805|intact-miscore:0.56|intact-miscore:0.56
CRX	BioID	O43186	Q08117	Prey	O43186_Q08117	TLE5	TLE family member 5 (Amino-terminal enhancer of split) (Amino enhancer of split) (Gp130-associated protein GAM) (Grg-5) (Groucho-related protein 5) (Protein ESP1) (Protein GRG) (TLE family member 5, transcriptional modulator)	TLE5 AES GRG GRG5	197	cellular response to extracellular stimulus [GO:0031668]; negative regulation of canonical Wnt signaling pathway [GO:0090090]; negative regulation of DNA-templated transcription [GO:0045892]; negative regulation of gene expression [GO:0010629]; negative regulation of protein binding [GO:0032091]; negative regulation of response to cytokine stimulus [GO:0060761]; negative regulation of transcripti…	nucleus [GO:0005634]	identical protein binding [GO:0042802]; transcription corepressor activity [GO:0003714]	5|7|5|7	24	6	4	1|0|1|1|0|1|1|1|1|0|0|0|1|1|0|0|0|0|0|0|1|0|0|1	0.99	1	0.99	1	0.99	4.18	13.09	0	Lisa	1 / 716	1	1	1	TRUE	IntAct	imex:IM-23318|pubmed:25416956|imex:IM-23318|pubmed:25416956|imex:IM-23318|pubmed:25416956	intact-miscore:0.56|intact-miscore:0.56|intact-miscore:0.56
CRX	BioID	O43186	Q7Z3K3	Prey	O43186_Q7Z3K3	POGZ	Pogo transposable element with ZNF domain (Suppressor of hairy wing homolog 5) (Zinc finger protein 280E) (Zinc finger protein 635)	POGZ KIAA0461 SUHW5 ZNF280E ZNF635 Nbla00003	1410	cell division [GO:0051301]; double-strand break repair via homologous recombination [GO:0000724]; kinetochore assembly [GO:0051382]; mitotic sister chromatid cohesion [GO:0007064]; positive regulation of transcription by RNA polymerase II [GO:0045944]	chromatin [GO:0000785]; cytoplasm [GO:0005737]; cytosol [GO:0005829]; nucleoplasm [GO:0005654]; nucleus [GO:0005634]	DNA binding [GO:0003677]; metal ion binding [GO:0046872]	24|25|21|20	90	22.5	4	6|1|2|1|1|2|1|1|0|1|1|2|2|2|0|1|1|1|0|0|2|2|4|2	1	1	1	1	1	21.76	15	0	Lisa	95 / 716	5.2	21	95	TRUE	IntAct	pubmed:32296183|imex:IM-25472|pubmed:32296183|imex:IM-25472|pubmed:32296183|imex:IM-25472	author score:0.9143380427|intact-miscore:0.56|author score:0.9143380427|intact-miscore:0.56|intact-miscore:0.56
PRDM1	BioID	O75626	O15014	Prey	O75626_O15014	ZNF609	Zinc finger protein 609	ZNF609 KIAA0295	1411	muscle organ development [GO:0007517]; positive regulation of neuron migration [GO:2001224]; positive regulation of transcription by RNA polymerase II [GO:0045944]; regulation of myoblast proliferation [GO:2000291]; regulation of transcription by RNA polymerase II [GO:0006357]	nucleoplasm [GO:0005654]; nucleus [GO:0005634]	metal ion binding [GO:0046872]; promoter-specific chromatin binding [GO:1990841]	13|13|14|12	52	13	4	6|4|3|2|5|0|9|1|7|3|0|0|0|0|0|0|0|0|0|0|0|0|0|0|1|2|4|7|2|1|10|9|0|0|1|1|1|0|0|0|2|0|0|2	0.91	0.93	0.91	0.93	0.91	2.07	6.89	0.02	Helka	70 / 716	2.3	13	70	TRUE	IntAct	pubmed:35140242|imex:IM-28767	intact-miscore:0.27
PRDM1	BioID	O75626	O60907	Prey	O75626_O60907	TBL1X	F-box-like/WD repeat-containing protein TBL1X (SMAP55) (Transducin beta-like protein 1X) (Transducin-beta-like protein 1, X-linked)	TBL1X TBL1	577	negative regulation of transcription by RNA polymerase II [GO:0000122]; positive regulation of canonical Wnt signaling pathway [GO:0090263]; positive regulation of DNA-templated transcription [GO:0045893]; positive regulation of transcription by RNA polymerase II [GO:0045944]; proteasome-mediated ubiquitin-dependent protein catabolic process [GO:0043161]; protein stabilization [GO:0050821]; prote…	histone deacetylase complex [GO:0000118]; mitotic spindle [GO:0072686]; nucleoplasm [GO:0005654]; nucleus [GO:0005634]; transcription repressor complex [GO:0017053]	histone binding [GO:0042393]; identical protein binding [GO:0042802]; transcription cis-regulatory region binding [GO:0000976]; transcription corepressor activity [GO:0003714]	13|14|15|19	61	15.25	4	12|10|7|4|9|3|10|5|10|6|0|0|4|0|0|0|0|0|0|0|0|0|0|2|0|5|1|0|0|0|7|5|0|0|0|0|0|0|0|0|7|0|0|0	0.89	0.95	0.89	0.95	0.89	1.65	6.27	0.03	Helka	9 / 716	1.1	2	9	TRUE	IntAct	pubmed:35140242|imex:IM-28767	intact-miscore:0.27
PRDM1	BioID	O75626	O75376	Prey	O75626_O75376	NCOR1	Nuclear receptor corepressor 1 (N-CoR) (N-CoR1)	NCOR1 KIAA1047	2440	chromatin organization [GO:0006325]; locomotor rhythm [GO:0045475]; negative regulation of androgen receptor signaling pathway [GO:0060766]; negative regulation of DNA-templated transcription [GO:0045892]; negative regulation of fatty acid metabolic process [GO:0045922]; negative regulation of glycolytic process [GO:0045820]; negative regulation of JNK cascade [GO:0046329]; negative regulation of…	chromatin [GO:0000785]; cytosol [GO:0005829]; histone deacetylase complex [GO:0000118]; membrane [GO:0016020]; mitotic spindle [GO:0072686]; nucleoplasm [GO:0005654]; nucleus [GO:0005634]; transcription repressor complex [GO:0017053]	histone deacetylase binding [GO:0042826]; nuclear receptor binding [GO:0016922]; nuclear thyroid hormone receptor binding [GO:0046966]; RNA polymerase II-specific DNA-binding transcription factor binding [GO:0061629]; transcription cis-regulatory region binding [GO:0000976]; transcription corepressor activity [GO:0003714]	35|37|39|38	149	37.25	4	16|19|24|11|26|13|20|11|22|11|4|2|5|1|8|3|1|0|1|2|3|1|1|2|1|2|30|31|4|4|16|20|0|0|5|3|2|4|0|0|26|18|3|2	0.85	0.89	0.85	0.89	0.85	1.3	4.34	0.04	Helka	101 / 716	8.3	62	101	TRUE	IntAct	pubmed:35140242|imex:IM-28767	intact-miscore:0.27
PRDM1	BioID	O75626	P05166	Prey	O75626_P05166	PCCB	Propionyl-CoA carboxylase beta chain, mitochondrial (PCCase subunit beta) (EC 6.4.1.3) (Propanoyl-CoA:carbon dioxide ligase subunit beta)	PCCB	539	branched-chain amino acid metabolic process [GO:0009081]; fatty acid metabolic process [GO:0006631]; short-chain fatty acid catabolic process [GO:0019626]	catalytic complex [GO:1902494]; cytosol [GO:0005829]; mitochondrial matrix [GO:0005759]; mitochondrion [GO:0005739]	ATP binding [GO:0005524]; propionyl-CoA carboxylase activity [GO:0004658]	213|188|329|308	1038	259.5	4	36|40|51|39|71|48|43|32|41|31|69|51|50|44|47|46|54|34|54|64|62|63|119|114|14|13|2|4|14|15|18|19|20|18|28|24|57|46|113|126|94|73|32|34	0.88	1	0.88	1	0.88	0.15	5.52	0.03	Helka	263 / 716	75.8	866	263	TRUE	IntAct	pubmed:35140242|imex:IM-28767	intact-miscore:0.27
PRDM1	BioID	O75626	P0C7T5	Prey	O75626_P0C7T5	ATXN1L	Ataxin-1-like (Brother of ataxin-1) (Brother of ATXN1)	ATXN1L BOAT BOAT1	689	anatomical structure development [GO:0048856]; brain development [GO:0007420]; extracellular matrix organization [GO:0030198]; learning [GO:0007612]; lung alveolus development [GO:0048286]; memory [GO:0007613]; negative regulation of transcription by RNA polymerase II [GO:0000122]; positive regulation of hematopoietic stem cell proliferation [GO:1902035]; regulation of DNA-templated transcription…	dendrite [GO:0030425]; nucleolus [GO:0005730]; nucleoplasm [GO:0005654]; nucleus [GO:0005634]	DNA binding [GO:0003677]; RNA binding [GO:0003723]	4|5|3|1	13	3.25	4	1|0|0|0|0|0|0|0|0|0|0|0|0|0|0|0|1|0|0|0|0|0|0|0|0|0|0|1|0|0|0|0|0|0|0|0|0|0|0|0|0|0|0|0	0.75	1	0.75	1	0.75	0.73	32.5	0.07	Helka	/ 716	0		0	TRUE	IntAct	pubmed:35140242|imex:IM-28767	intact-miscore:0.27
PRDM1	BioID	O75626	P10809	Prey	O75626_P10809	HSPD1	60 kDa heat shock protein, mitochondrial (EC 5.6.1.7) (60 kDa chaperonin) (Chaperonin 60) (CPN60) (Heat shock protein 60) (HSP-60) (Hsp60) (HuCHA60) (Mitochondrial matrix protein P1) (P60 lymphocyte protein)	HSPD1 HSP60	573	'de novo' protein folding [GO:0006458]; activation of cysteine-type endopeptidase activity involved in apoptotic process [GO:0006919]; apoptotic mitochondrial changes [GO:0008637]; B cell activation [GO:0042113]; B cell proliferation [GO:0042100]; biological process involved in interaction with symbiont [GO:0051702]; cellular response to interleukin-7 [GO:0098761]; chaperone-mediated protein comp…	cell surface [GO:0009986]; clathrin-coated pit [GO:0005905]; coated vesicle [GO:0030135]; cytoplasm [GO:0005737]; cytosol [GO:0005829]; early endosome [GO:0005769]; extracellular exosome [GO:0070062]; extracellular space [GO:0005615]; lipopolysaccharide receptor complex [GO:0046696]; membrane [GO:0016020]; migrasome [GO:0140494]; mitochondrial inner membrane [GO:0005743]; mitochondrial matrix [GO…	apolipoprotein A-I binding [GO:0034186]; apolipoprotein binding [GO:0034185]; ATP binding [GO:0005524]; ATP hydrolysis activity [GO:0016887]; ATP-dependent protein folding chaperone [GO:0140662]; DNA replication origin binding [GO:0003688]; double-stranded RNA binding [GO:0003725]; enzyme binding [GO:0019899]; high-density lipoprotein particle binding [GO:0008035]; isomerase activity [GO:0016853]…	102|126|154|161	543	135.75	4	38|42|45|34|40|34|46|33|41|36|12|6|16|14|12|10|12|4|13|13|8|16|13|24|11|10|11|10|7|7|12|10|6|2|10|1|23|30|11|10|25|19|14|10	1	1	1	1	1	5.74	7.46	0	Helka	520 / 716	22.2	217	520	TRUE	IntAct	pubmed:35140242|imex:IM-28767	intact-miscore:0.35
PRDM1	BioID	O75626	P62072	Prey	O75626_P62072	TIMM10	Mitochondrial import inner membrane translocase subunit Tim10	TIMM10 TIM10	90	protein insertion into mitochondrial inner membrane [GO:0045039]; protein targeting to mitochondrion [GO:0006626]; sensory perception of sound [GO:0007605]	mitochondrial inner membrane [GO:0005743]; mitochondrial intermembrane space [GO:0005758]; mitochondrial intermembrane space protein transporter complex [GO:0042719]; mitochondrion [GO:0005739]; TIM22 mitochondrial import inner membrane insertion complex [GO:0042721]; TIM23 mitochondrial import inner membrane translocase complex [GO:0005744]	membrane insertase activity [GO:0032977]; protein homodimerization activity [GO:0042803]; protein-folding chaperone binding [GO:0051087]; zinc ion binding [GO:0008270]	2|2|2|2	8	2	4	0|0|0|0|0|0|0|0|0|0|0|0|0|0|0|0|0|0|0|0|0|0|0|0|0|0|0|0|0|0|0|0|0|0|0|0|0|0|0|0|0|0|0|0	0.94	0.94	0.94	0.94	0.94	2.76	20	0.02	Helka	10 / 716	1.1	2	10	TRUE	IntAct	pubmed:35140242|imex:IM-28767|pubmed:35140242|imex:IM-28767	intact-miscore:0.42|intact-miscore:0.42
PRDM1	BioID	O75626	Q04724	Prey	O75626_Q04724	TLE1	Transducin-like enhancer protein 1 (E(Sp1) homolog) (Enhancer of split groucho-like protein 1) (ESG1)	TLE1	770	animal organ morphogenesis [GO:0009887]; negative regulation of anoikis [GO:2000811]; negative regulation of canonical NF-kappaB signal transduction [GO:0043124]; negative regulation of canonical Wnt signaling pathway [GO:0090090]; negative regulation of DNA-templated transcription [GO:0045892]; negative regulation of Wnt signaling pathway [GO:0030178]; positive regulation of gene expression [GO:…	beta-catenin-TCF complex [GO:1990907]; cytosol [GO:0005829]; nucleoplasm [GO:0005654]; nucleus [GO:0005634]; transcription regulator complex [GO:0005667]	DNA-binding transcription factor binding [GO:0140297]; identical protein binding [GO:0042802]; transcription corepressor activity [GO:0003714]	21|16|36|31	104	26	4	7|6|4|0|4|0|8|0|9|5|0|0|0|0|0|0|0|0|0|0|0|0|0|0|0|0|1|1|0|0|1|1|0|0|0|0|0|0|0|0|0|0|0|0	0.99	1	0.99	1	0.99	3.91	24.34	0	Helka	35 / 716	1.6	5	35	TRUE	IntAct	pubmed:35140242|imex:IM-28767	intact-miscore:0.27
PRDM1	BioID	O75626	Q04726	Prey	O75626_Q04726	TLE3	Transducin-like enhancer protein 3 (Enhancer of split groucho-like protein 3) (ESG3)	TLE3 KIAA1547	772	animal organ morphogenesis [GO:0009887]; negative regulation of canonical Wnt signaling pathway [GO:0090090]; negative regulation of cold-induced thermogenesis [GO:0120163]; signal transduction [GO:0007165]; Wnt signaling pathway [GO:0016055]	beta-catenin-TCF complex [GO:1990907]; nucleoplasm [GO:0005654]; nucleus [GO:0005634]; transcription regulator complex [GO:0005667]	transcription corepressor activity [GO:0003714]	56|44|63|66	229	57.25	4	15|13|12|10|8|6|15|10|17|12|3|0|2|2|3|2|3|0|1|2|0|0|2|1|3|1|3|3|4|4|13|8|2|0|4|1|7|6|0|0|10|6|6|7	1	1	1	1	1	6.5	11.1	0	Helka	97 / 716	1.6	7	97	TRUE	IntAct	pubmed:35140242|imex:IM-28767	intact-miscore:0.27
PRDM1	BioID	O75626	Q04727	Prey	O75626_Q04727	TLE4	Transducin-like enhancer protein 4 (Grg-4) (Groucho-related protein 4)	TLE4 GRG4 KIAA1261	773	cellular response to leukemia inhibitory factor [GO:1990830]; negative regulation of canonical Wnt signaling pathway [GO:0090090]; negative regulation of transcription by RNA polymerase II [GO:0000122]; Wnt signaling pathway [GO:0016055]	beta-catenin-TCF complex [GO:1990907]; nucleoplasm [GO:0005654]; nucleus [GO:0005634]; transcription regulator complex [GO:0005667]	chromatin binding [GO:0003682]; DNA-binding transcription factor binding [GO:0140297]; transcription corepressor activity [GO:0003714]	0|13|30|27	70	17.5	4	0|0|0|0|0|0|0|0|0|0|0|0|0|0|0|0|0|0|0|0|0|0|0|0|0|0|0|0|0|0|0|0|0|0|0|0|0|0|0|0|0|0|0|0	0.75	1	0.75	1	0.75	-1.78	175	0.06	Helka	35 / 716	1.2	3	35	TRUE	IntAct	pubmed:35140242|imex:IM-28767	intact-miscore:0.27
PRDM1	BioID	O75626	Q04837	Prey	O75626_Q04837	SSBP1	Single-stranded DNA-binding protein, mitochondrial (Mt-SSB) (MtSSB) (PWP1-interacting protein 17)	SSBP1 SSBP	148	DNA unwinding involved in DNA replication [GO:0006268]; mitochondrial DNA replication [GO:0006264]; mitochondrion morphogenesis [GO:0070584]; positive regulation of helicase activity [GO:0051096]; positive regulation of mitochondrial DNA replication [GO:0090297]; protein homotetramerization [GO:0051289]	extracellular exosome [GO:0070062]; mitochondrial matrix [GO:0005759]; mitochondrial nucleoid [GO:0042645]; mitochondrion [GO:0005739]; nucleus [GO:0005634]	chromatin binding [GO:0003682]; identical protein binding [GO:0042802]; protein homodimerization activity [GO:0042803]; RNA binding [GO:0003723]; single-stranded DNA binding [GO:0003697]	4|3|3|4	14	3.5	4	0|0|0|0|0|0|0|0|0|0|0|0|0|0|0|0|0|0|0|0|0|0|0|0|0|0|0|0|0|0|0|0|0|0|0|0|0|0|0|0|0|0|0|0	0.99	1	0.99	1	0.99	4.6	35	0	Helka	169 / 716	3.4	18	169	TRUE	IntAct	pubmed:35140242|imex:IM-28767	intact-miscore:0.27
PRDM1	BioID	O75626	Q08117	Prey	O75626_Q08117	TLE5	TLE family member 5 (Amino-terminal enhancer of split) (Amino enhancer of split) (Gp130-associated protein GAM) (Grg-5) (Groucho-related protein 5) (Protein ESP1) (Protein GRG) (TLE family member 5, transcriptional modulator)	TLE5 AES GRG GRG5	197	cellular response to extracellular stimulus [GO:0031668]; negative regulation of canonical Wnt signaling pathway [GO:0090090]; negative regulation of DNA-templated transcription [GO:0045892]; negative regulation of gene expression [GO:0010629]; negative regulation of protein binding [GO:0032091]; negative regulation of response to cytokine stimulus [GO:0060761]; negative regulation of transcripti…	nucleus [GO:0005634]	identical protein binding [GO:0042802]; transcription corepressor activity [GO:0003714]	5|5|8|7	25	6.25	4	0|2|2|0|1|0|0|0|0|1|0|0|0|0|0|0|0|0|0|0|0|0|0|0|0|0|2|1|0|0|2|2|0|0|1|0|0|0|0|0|0|0|0|0	0.99	1	0.99	1	0.99	4.28	19.64	0	Helka	1 / 716	1	1	1	TRUE	IntAct	pubmed:35140242|imex:IM-28767	intact-miscore:0.27
PRDM1	BioID	O75626	Q12857	Prey	O75626_Q12857	NFIA	Nuclear factor 1 A-type (NF1-A) (Nuclear factor 1/A) (CCAAT-box-binding transcription factor) (CTF) (Nuclear factor I/A) (NF-I/A) (NFI-A) (TGGCA-binding protein)	NFIA KIAA1439	509	BMP signaling pathway [GO:0030509]; cartilage development [GO:0051216]; cell morphogenesis [GO:0000902]; DNA replication [GO:0006260]; exit from mitosis [GO:0010458]; gene expression [GO:0010467]; glial cell fate specification [GO:0021780]; glial cell proliferation [GO:0014009]; limb morphogenesis [GO:0035108]; neural precursor cell proliferation [GO:0061351]; neuron fate specification [GO:004866…	cell junction [GO:0030054]; chromatin [GO:0000785]; nucleoplasm [GO:0005654]; nucleus [GO:0005634]	chromatin binding [GO:0003682]; DNA-binding transcription activator activity, RNA polymerase II-specific [GO:0001228]; DNA-binding transcription factor activity [GO:0003700]; DNA-binding transcription factor activity, RNA polymerase II-specific [GO:0000981]; DNA-binding transcription factor binding [GO:0140297]; RNA polymerase II cis-regulatory region sequence-specific DNA binding [GO:0000978]	3|3|5|5	16	4	4	4|2|3|0|0|0|3|0|3|0|0|0|1|0|0|0|0|0|0|0|0|0|0|0|0|0|1|0|0|3|3|0|0|0|0|0|0|0|0|0|0|1|0|0	0.77	0.89	0.77	0.89	0.77	0.66	7.33	0.06	Helka	71 / 716	2.6	19	71	TRUE	IntAct	pubmed:35140242|imex:IM-28767|pubmed:35140242|imex:IM-28767	intact-miscore:0.47|intact-miscore:0.47
PRDM1	BioID	O75626	Q14687	Prey	O75626_Q14687	GSE1	Genetic suppressor element 1	GSE1 KIAA0182	1217				61|55|62|59	237	59.25	4	20|20|22|11|25|15|19|13|17|12|2|1|1|1|1|0|0|1|0|0|0|0|0|0|1|1|15|13|3|1|10|9|1|0|2|1|2|2|0|0|12|4|1|2	0.99	0.99	0.99	0.99	0.99	4.65	9.99	0	Helka	91 / 716	4.1	19	91	TRUE	IntAct	pubmed:35140242|imex:IM-28767	intact-miscore:0.27
PRDM1	BioID	O75626	Q6W2J9	Prey	O75626_Q6W2J9	BCOR	BCL-6 corepressor (BCoR)	BCOR KIAA1575	1755	blastocyst hatching [GO:0001835]; chromatin remodeling [GO:0006338]; heart development [GO:0007507]; negative regulation of bone mineralization [GO:0030502]; negative regulation of DNA-templated transcription [GO:0045892]; negative regulation of tooth mineralization [GO:0070171]; negative regulation of transcription by RNA polymerase II [GO:0000122]; odontogenesis [GO:0042476]; roof of mouth deve…	BCOR complex [GO:0140261]; nucleoplasm [GO:0005654]; nucleus [GO:0005634]	DNA-binding transcription factor binding [GO:0140297]; heat shock protein binding [GO:0031072]; histone deacetylase binding [GO:0042826]; RNA polymerase II transcription regulatory region sequence-specific DNA binding [GO:0000977]; transcription cis-regulatory region binding [GO:0000976]; transcription corepressor activity [GO:0003714]	67|75|76|89	307	76.75	4	32|31|21|10|29|12|29|11|29|18|11|7|10|7|3|4|7|2|3|3|1|4|0|1|0|4|40|35|7|8|16|31|1|3|6|5|5|7|0|0|20|16|4|5	0.99	1	0.99	1	0.99	3.75	6.78	0	Helka	94 / 716	7.7	25	94	TRUE	IntAct	pubmed:35140242|imex:IM-28767	intact-miscore:0.27
PRDM1	BioID	O75626	Q86SE9	Prey	O75626_Q86SE9	PCGF5	Polycomb group RING finger protein 5 (RING finger protein 159)	PCGF5 RNF159	256	inactivation of X chromosome by genomic imprinting [GO:0060819]; positive regulation of transcription by RNA polymerase II [GO:0045944]; regulation of transcription by RNA polymerase II [GO:0006357]	centrosome [GO:0005813]; Golgi apparatus [GO:0005794]; nucleoplasm [GO:0005654]; nucleus [GO:0005634]; PcG protein complex [GO:0031519]; PRC1 complex [GO:0035102]; X chromosome [GO:0000805]	histone H2AK119 ubiquitin ligase activity [GO:0140862]; metal ion binding [GO:0046872]	4|4|3|3	14	3.5	4	1|0|0|0|0|0|1|1|1|1|0|1|0|1|0|0|0|0|0|0|0|0|0|0|0|0|0|0|0|0|0|0|0|0|0|0|0|0|0|0|0|0|0|0	0.99	1	0.99	1	0.99	3.67	22	0	Helka	6 / 716	1	1	6	TRUE	IntAct	pubmed:35140242|imex:IM-28767	intact-miscore:0.27
PRDM1	BioID	O75626	Q86UP3	Prey	O75626_Q86UP3	ZFHX4	Zinc finger homeobox protein 4 (Zinc finger homeodomain protein 4) (ZFH-4)	ZFHX4	3567	regulation of transcription by RNA polymerase II [GO:0006357]	chromatin [GO:0000785]; nucleus [GO:0005634]	DNA-binding transcription factor activity, RNA polymerase II-specific [GO:0000981]; RNA polymerase II cis-regulatory region sequence-specific DNA binding [GO:0000978]; zinc ion binding [GO:0008270]	17|11|13|18	59	14.75	4	0|0|1|0|1|0|0|0|0|0|2|2|2|1|0|0|0|0|0|0|0|0|0|0|0|0|1|3|1|0|1|2|0|0|0|0|1|0|0|0|0|0|0|0	1	1	1	1	1	10.6	36.06	0	Helka	6 / 716	1.2	2	6	TRUE	IntAct	pubmed:35140242|imex:IM-28767	intact-miscore:0.27
PRDM1	BioID	O75626	Q8NHM5	Prey	O75626_Q8NHM5	KDM2B	Lysine-specific demethylase 2B (EC 1.14.11.27) (CXXC-type zinc finger protein 2) (F-box and leucine-rich repeat protein 10) (F-box protein FBL10) (F-box/LRR-repeat protein 10) (JmjC domain-containing histone demethylation protein 1B) (Jumonji domain-containing EMSY-interactor methyltransferase motif protein) (Protein JEMMA) (Protein-containing CXXC domain 2) ([Histone-H3]-lysine-36 demethylase 1B)	KDM2B CXXC2 FBL10 FBXL10 JHDM1B NDY1 PCCX2	1336	chromatin remodeling [GO:0006338]; embryonic camera-type eye morphogenesis [GO:0048596]; forebrain development [GO:0030900]; fourth ventricle development [GO:0021592]; hindbrain development [GO:0030902]; initiation of neural tube closure [GO:0021993]; lateral ventricle development [GO:0021670]; midbrain development [GO:0030901]; midbrain-hindbrain boundary morphogenesis [GO:0021555]; negative reg…	chromosome [GO:0005694]; nucleolus [GO:0005730]; nucleoplasm [GO:0005654]; nucleus [GO:0005634]; PcG protein complex [GO:0031519]	DNA binding [GO:0003677]; histone demethylase activity [GO:0032452]; histone H3K36 demethylase activity [GO:0051864]; histone H3K36me/H3K36me2 demethylase activity [GO:0140680]; RNA polymerase II cis-regulatory region sequence-specific DNA binding [GO:0000978]; rRNA binding [GO:0019843]; transcription coregulator activity [GO:0003712]; unmethylated CpG binding [GO:0045322]; zinc ion binding [GO:0…	16|20|17|20	73	18.25	4	1|3|1|0|4|2|2|2|4|2|0|0|0|0|0|0|1|0|0|1|1|0|0|0|0|0|5|5|0|0|0|0|0|0|0|0|0|0|0|0|2|1|0|0	1	1	1	1	1	7	21.7	0	Helka	23 / 716	1.5	4	23	TRUE	IntAct	pubmed:35140242|imex:IM-28767	intact-miscore:0.27
PRDM1	BioID	O75626	Q96F45	Prey	O75626_Q96F45	ZNF503	Zinc finger protein 503	ZNF503 NOLZ1	646	G1 to G0 transition involved in cell differentiation [GO:0070315]; negative regulation of cell population proliferation [GO:0008285]; negative regulation of DNA-templated transcription [GO:0045892]; negative regulation of gene expression [GO:0010629]; neural precursor cell proliferation [GO:0061351]	nucleus [GO:0005634]	metal ion binding [GO:0046872]	6|4|3|3	16	4	4	1|1|1|0|1|0|2|0|0|0|1|1|1|1|0|0|0|0|0|0|0|0|0|0|0|0|1|1|1|0|1|0|0|0|0|0|0|0|0|0|0|0|0|0	0.94	1	0.94	1	0.94	2.1	12.57	0.02	Helka	22 / 716	1.1	2	22	TRUE	IntAct	pubmed:35140242|imex:IM-28767	intact-miscore:0.27
PRDM1	BioID	O75626	Q96RK0	Prey	O75626_Q96RK0	CIC	Protein capicua homolog	CIC KIAA0306	1608	brain development [GO:0007420]; learning [GO:0007612]; memory [GO:0007613]; negative regulation of DNA-templated transcription [GO:0045892]; regulation of transcription by RNA polymerase II [GO:0006357]; social behavior [GO:0035176]	chromatin [GO:0000785]; intracellular membrane-bounded organelle [GO:0043231]; nucleoplasm [GO:0005654]; nucleus [GO:0005634]	DNA-binding transcription factor activity, RNA polymerase II-specific [GO:0000981]; RNA polymerase II transcription regulatory region sequence-specific DNA binding [GO:0000977]	26|26|15|17	84	21	4	13|9|7|5|9|4|13|3|10|7|1|0|0|0|2|1|0|1|0|0|0|0|0|1|0|2|13|15|2|1|5|5|0|0|3|2|0|2|0|0|8|3|1|0	0.9	0.97	0.9	0.97	0.9	1.41	6.24	0.03	Helka	101 / 716	9.2	38	101	TRUE	IntAct	pubmed:35140242|imex:IM-28767	intact-miscore:0.27
PRDM1	BioID	O75626	Q9BSM1	Prey	O75626_Q9BSM1	PCGF1	Polycomb group RING finger protein 1 (Nervous system Polycomb-1) (NSPc1) (RING finger protein 68)	PCGF1 NSPC1 RNF68	259	chromatin remodeling [GO:0006338]; negative regulation of transcription by RNA polymerase II [GO:0000122]; regulation of DNA-templated transcription [GO:0006355]	nucleoplasm [GO:0005654]; nucleus [GO:0005634]; PcG protein complex [GO:0031519]; PRC1 complex [GO:0035102]	metal ion binding [GO:0046872]; promoter-specific chromatin binding [GO:1990841]	5|4|4|3	16	4	4	3|1|1|1|1|1|1|2|3|0|1|0|0|0|1|1|1|0|1|0|0|0|0|0|0|1|1|1|1|0|1|1|0|0|0|0|0|1|0|0|0|2|0|0	0.82	0.96	0.82	0.96	0.82	0.47	6.29	0.05	Helka	11 / 716	1	1	11	TRUE	IntAct	pubmed:35140242|imex:IM-28767	intact-miscore:0.27
PRDM1	BioID	O75626	Q9H334	Prey	O75626_Q9H334	FOXP1	Forkhead box protein P1 (Mac-1-regulated forkhead) (MFH)	FOXP1 HSPC215	677	cellular response to tumor necrosis factor [GO:0071356]; DNA damage response [GO:0006974]; endothelial cell activation [GO:0042118]; macrophage activation [GO:0042116]; monocyte activation [GO:0042117]; negative regulation of androgen receptor signaling pathway [GO:0060766]; negative regulation of B cell apoptotic process [GO:0002903]; negative regulation of cell growth involved in cardiac muscle…	chromatin [GO:0000785]; nucleoplasm [GO:0005654]; nucleus [GO:0005634]	core promoter sequence-specific DNA binding [GO:0001046]; DNA-binding transcription factor activity, RNA polymerase II-specific [GO:0000981]; DNA-binding transcription repressor activity, RNA polymerase II-specific [GO:0001227]; identical protein binding [GO:0042802]; metal ion binding [GO:0046872]; nuclear androgen receptor binding [GO:0050681]; protein self-association [GO:0043621]; RNA polymer…	3|5|6|3	17	4.25	4	1|2|0|0|0|0|1|0|0|0|0|0|0|0|0|0|0|0|0|0|0|0|0|0|0|0|1|2|0|0|2|1|0|0|0|0|0|0|0|0|0|0|0|0	0.96	1	0.96	1	0.96	2.41	18.7	0.01	Helka	6 / 716	1.2	2	6	TRUE	IntAct	pubmed:35140242|imex:IM-28767	intact-miscore:0.27
PRDM1	BioID	O75626	Q9H7S9	Prey	O75626_Q9H7S9	ZNF703	Zinc finger protein 703 (Zinc finger elbow-related proline domain protein 1)	ZNF703 ZEPPO1 ZPO1	590	adherens junction assembly [GO:0034333]; cellular response to estradiol stimulus [GO:0071392]; mammary gland epithelial cell differentiation [GO:0060644]; negative regulation of DNA-templated transcription [GO:0045892]; negative regulation of homotypic cell-cell adhesion [GO:0034111]; positive regulation of cell migration [GO:0030335]; positive regulation of cell population proliferation [GO:0008…	cytoplasm [GO:0005737]; nuclear matrix [GO:0016363]; nucleus [GO:0005634]; protein-containing complex [GO:0032991]	DNA-binding transcription factor binding [GO:0140297]; metal ion binding [GO:0046872]	10|5|5|4	24	6	4	0|0|0|0|0|0|0|0|0|0|0|0|0|0|0|0|0|0|0|0|0|0|0|0|0|0|0|0|0|0|0|0|0|0|0|0|0|0|0|0|0|0|0|0	1	1	1	1	1	6.34	60	0	Helka	26 / 716	1.3	3	26	TRUE	IntAct	pubmed:35140242|imex:IM-28767	intact-miscore:0.27
PRDM1	BioID	O75626	Q9HCM7	Prey	O75626_Q9HCM7	FBRSL1	Fibrosin-1-like protein (AUTS2-like protein) (HBV X-transactivated gene 9 protein) (HBV XAg-transactivated protein 9)	FBRSL1 AUTS2L KIAA1545 XTP9	1045			RNA binding [GO:0003723]	7|4|6|7	24	6	4	0|1|0|0|0|0|2|0|0|0|0|0|0|0|0|0|0|0|0|0|0|0|0|0|0|0|0|0|0|0|0|0|0|0|0|0|0|0|0|0|0|0|0|0	1	1	1	1	1	7.51	60	0	Helka	6 / 716	1.3	3	6	TRUE	IntAct	pubmed:35140242|imex:IM-28767	intact-miscore:0.27
PRDM1	BioID	O75626	Q9NP66	Prey	O75626_Q9NP66	HMG20A	High mobility group protein 20A (HMG box-containing protein 20A) (HMG domain-containing protein 1) (HMG domain-containing protein HMGX1)	HMG20A HMGX1 HMGXB1	347	chromatin organization [GO:0006325]; negative regulation of neuron differentiation [GO:0045665]; negative regulation of protein sumoylation [GO:0033234]; negative regulation of transcription by RNA polymerase II [GO:0000122]; regulation of DNA-templated transcription [GO:0006355]; regulation of gene expression [GO:0010468]	nucleus [GO:0005634]	DNA binding [GO:0003677]; identical protein binding [GO:0042802]	7|6|5|5	23	5.75	4	2|2|2|1|3|1|2|3|2|2|0|0|0|0|0|0|0|0|0|0|0|0|0|0|0|0|2|2|0|0|0|2|0|0|0|0|0|1|0|0|1|1|0|0	0.95	0.99	0.95	0.99	0.95	2.52	8.72	0.01	Helka	27 / 716	2.6	6	27	TRUE	IntAct	pubmed:35140242|imex:IM-28767	intact-miscore:0.27
PRDM1	BioID	O75626	Q9NQB0	Prey	O75626_Q9NQB0	TCF7L2	Transcription factor 7-like 2 (HMG box transcription factor 4) (T-cell-specific transcription factor 4) (T-cell factor 4) (TCF-4) (hTCF-4)	TCF7L2 TCF4	619	blood vessel development [GO:0001568]; canonical Wnt signaling pathway [GO:0060070]; canonical Wnt signaling pathway involved in positive regulation of epithelial to mesenchymal transition [GO:0044334]; fat cell differentiation [GO:0045444]; glucose homeostasis [GO:0042593]; maintenance of DNA repeat elements [GO:0043570]; myoblast fate commitment [GO:0048625]; negative regulation of canonical Wn…	beta-catenin-TCF complex [GO:1990907]; beta-catenin-TCF7L2 complex [GO:0070369]; catenin-TCF7L2 complex [GO:0071664]; chromatin [GO:0000785]; nucleoplasm [GO:0005654]; nucleus [GO:0005634]; PML body [GO:0016605]; protein-DNA complex [GO:0032993]	armadillo repeat domain binding [GO:0070016]; beta-catenin binding [GO:0008013]; DNA-binding transcription factor activity [GO:0003700]; DNA-binding transcription factor activity, RNA polymerase II-specific [GO:0000981]; gamma-catenin binding [GO:0045295]; nuclear receptor binding [GO:0016922]; promoter-specific chromatin binding [GO:1990841]; protein kinase binding [GO:0019901]; RNA polymerase I…	3|5|3|3	14	3.5	4	2|0|0|0|0|0|0|0|0|0|0|0|0|0|0|0|0|0|0|0|0|0|0|0|0|0|0|0|0|0|0|0|0|0|0|0|0|0|0|0|0|0|0|0	0.99	1	0.99	1	0.99	4.6	35	0	Helka	16 / 716	1.2	2	16	TRUE	IntAct	pubmed:35140242|imex:IM-28767	intact-miscore:0.27
PRDM1	BioID	O75626	Q9NQP4	Prey	O75626_Q9NQP4	PFDN4	Prefoldin subunit 4 (Protein C-1)	PFDN4 PFD4	134	chaperone-mediated protein folding [GO:0061077]; negative regulation of amyloid fibril formation [GO:1905907]; protein folding [GO:0006457]	cytoplasm [GO:0005737]; cytosol [GO:0005829]; mitochondrion [GO:0005739]; nucleus [GO:0005634]; prefoldin complex [GO:0016272]	amyloid-beta binding [GO:0001540]; protein-folding chaperone binding [GO:0051087]; unfolded protein binding [GO:0051082]	2|2|2|2	8	2	4	0|0|0|0|0|0|0|0|0|0|0|0|0|0|1|1|0|0|0|0|0|0|0|0|0|0|0|0|1|1|0|0|2|2|0|0|0|0|0|0|0|0|0|1	0.77	0.77	0.77	0.77	0.77	1.18	9.78	0.06	Helka	42 / 716	1.3	2	42	TRUE	IntAct	pubmed:35140242|imex:IM-28767	intact-miscore:0.27
PRDM1	BioID	O75626	Q9P0W2	Prey	O75626_Q9P0W2	HMG20B	SWI/SNF-related matrix-associated actin-dependent regulator of chromatin subfamily E member 1-related (SMARCE1-related protein) (BRCA2-associated factor 35) (HMG box-containing protein 20B) (HMG domain-containing protein 2) (HMG domain-containing protein HMGX2) (Sox-like transcriptional factor) (Structural DNA-binding protein BRAF35)	HMG20B BRAF35 HMGX2 HMGXB2 SMARCE1R	317	cell cycle [GO:0007049]; chromatin organization [GO:0006325]; negative regulation of protein sumoylation [GO:0033234]; positive regulation of neuron differentiation [GO:0045666]; protein sumoylation [GO:0016925]; regulation of gene expression [GO:0010468]; skeletal muscle cell differentiation [GO:0035914]	chromosome [GO:0005694]; nuclear body [GO:0016604]; nucleoplasm [GO:0005654]; nucleus [GO:0005634]	DNA binding [GO:0003677]	2|3|5|2	12	3	4	0|0|1|0|2|0|0|0|1|0|0|0|0|1|0|0|0|0|0|0|0|0|0|0|0|0|0|0|0|0|0|0|0|0|0|0|0|0|0|0|0|0|0|0	0.96	1	0.96	1	0.96	2.46	26.4	0.01	Helka	1 / 716	2	2	1	TRUE	IntAct	pubmed:35140242|imex:IM-28767	intact-miscore:0.27
PRDM1	BioID	O75626	Q9P2K3	Prey	O75626_Q9P2K3	RCOR3	REST corepressor 3	RCOR3 KIAA1343	495	negative regulation of DNA-templated transcription [GO:0045892]; regulation of transcription by RNA polymerase II [GO:0006357]	cytosol [GO:0005829]; histone deacetylase complex [GO:0000118]; nucleoplasm [GO:0005654]; transcription regulator complex [GO:0005667]	transcription corepressor activity [GO:0003714]	19|23|18|15	75	18.75	4	9|10|9|7|10|6|11|4|9|8|0|0|0|0|0|0|0|0|0|0|0|0|0|0|0|0|4|5|0|0|2|3|0|0|0|0|0|0|0|0|6|5|0|0	0.94	0.98	0.94	0.98	0.94	2.07	7.64	0.02	Helka	42 / 716	2.5	10	42	TRUE	IntAct	pubmed:35140242|imex:IM-28767	intact-miscore:0.27
PRDM1	BioID	O75626	Q9UHF7	Prey	O75626_Q9UHF7	TRPS1	Zinc finger transcription factor Trps1 (Tricho-rhino-phalangeal syndrome type I protein) (Zinc finger protein GC79)	TRPS1	1281	negative regulation of transcription by RNA polymerase II [GO:0000122]; regulation of chondrocyte differentiation [GO:0032330]; regulation of transcription by RNA polymerase II [GO:0006357]; skeletal system development [GO:0001501]	chromatin [GO:0000785]; nucleoplasm [GO:0005654]; nucleus [GO:0005634]; protein-containing complex [GO:0032991]	DNA-binding transcription factor activity [GO:0003700]; DNA-binding transcription repressor activity, RNA polymerase II-specific [GO:0001227]; protein domain specific binding [GO:0019904]; RNA polymerase II transcription regulatory region sequence-specific DNA binding [GO:0000977]; zinc ion binding [GO:0008270]	3|3|5|6	17	4.25	4	0|0|3|0|1|0|0|0|0|0|0|1|0|1|0|0|0|0|0|0|0|0|0|0|0|0|6|7|0|1|2|4|0|0|0|0|0|0|0|0|0|0|0|0	0.77	0.9	0.77	0.9	0.77	0.69	7.19	0.06	Helka	28 / 716	1.3	5	28	TRUE	IntAct	pubmed:35140242|imex:IM-28767	intact-miscore:0.27
PRDM1	BioID	O75626	Q9UKL0	Prey	O75626_Q9UKL0	RCOR1	REST corepressor 1 (Protein CoREST)	RCOR1 KIAA0071 RCOR	485	chromatin organization [GO:0006325]; erythrocyte differentiation [GO:0030218]; negative regulation of DNA-templated transcription [GO:0045892]; negative regulation of gene expression [GO:0010629]; positive regulation of megakaryocyte differentiation [GO:0045654]; regulation of transcription by RNA polymerase II [GO:0006357]	DNA repair complex [GO:1990391]; histone deacetylase complex [GO:0000118]; nucleoplasm [GO:0005654]; nucleus [GO:0005634]; transcription regulator complex [GO:0005667]; transcription repressor complex [GO:0017053]	chromatin binding [GO:0003682]; enzyme binding [GO:0019899]; transcription corepressor activity [GO:0003714]	27|25|27|29	108	27	4	16|17|14|9|15|13|14|9|15|13|6|2|2|2|3|3|3|1|4|4|2|2|3|3|0|1|8|8|3|4|5|7|1|2|2|3|7|7|0|0|10|12|5|6	0.93	0.96	0.93	0.96	0.93	2.13	4.47	0.02	Helka	63 / 716	2.7	15	63	TRUE	IntAct	pubmed:35140242|imex:IM-28767	intact-miscore:0.27
PRDM1	BioID	O75626	Q9ULD9	Prey	O75626_Q9ULD9	ZNF608	Zinc finger protein 608 (Renal carcinoma antigen NY-REN-36)	ZNF608 KIAA1281	1512	negative regulation of transcription by RNA polymerase II [GO:0000122]; regulation of transcription by RNA polymerase II [GO:0006357]	nucleus [GO:0005634]	metal ion binding [GO:0046872]	2|5|11|11	29	7.25	4	2|1|0|0|0|1|2|0|2|1|0|0|0|0|0|0|0|0|0|0|0|0|0|0|0|1|2|2|0|0|2|1|0|0|0|0|0|0|0|0|1|0|0|0	0.87	1	0.87	1	0.87	-0.01	17.72	0.03	Helka	8 / 716	1	1	8	TRUE	IntAct	pubmed:35140242|imex:IM-28767	intact-miscore:0.27
PRDM1	BioID	O75626	Q9Y4B4	Prey	O75626_Q9Y4B4	RAD54L2	Helicase ARIP4 (EC 3.6.4.12) (Androgen receptor-interacting protein 4) (RAD54-like protein 2)	RAD54L2 ARIP4 KIAA0809	1467		nucleus [GO:0005634]	ATP binding [GO:0005524]; ATP hydrolysis activity [GO:0016887]; ATP-dependent chromatin remodeler activity [GO:0140658]; DNA binding [GO:0003677]; helicase activity [GO:0004386]	5|6|5|5	21	5.25	4	0|0|0|0|0|0|0|0|0|0|0|0|0|0|0|0|0|0|0|0|0|0|0|0|0|0|0|0|0|0|0|0|0|0|0|0|0|0|0|0|0|0|0|0	1	1	1	1	1	8.02	52.5	0	Helka	3 / 716	1.3	2	3	TRUE	IntAct	pubmed:35140242|imex:IM-28767	intact-miscore:0.27
PRDM1	BioID	O75626	Q9Y5J7	Prey	O75626_Q9Y5J7	TIMM9	Mitochondrial import inner membrane translocase subunit Tim9	TIMM9 TIM9 TIM9A TIMM9A	89	protein insertion into mitochondrial inner membrane [GO:0045039]; protein targeting to mitochondrion [GO:0006626]; sensory perception of sound [GO:0007605]	mitochondrial inner membrane [GO:0005743]; mitochondrial intermembrane space [GO:0005758]; mitochondrial intermembrane space protein transporter complex [GO:0042719]; mitochondrion [GO:0005739]; TIM22 mitochondrial import inner membrane insertion complex [GO:0042721]	membrane insertase activity [GO:0032977]; protein homodimerization activity [GO:0042803]; protein-folding chaperone binding [GO:0051087]; zinc ion binding [GO:0008270]	1|3|5|7	16	4	4	0|0|0|0|0|0|0|0|0|0|0|0|0|0|0|0|0|0|0|0|0|0|0|0|0|0|0|0|0|0|0|0|0|0|0|0|0|0|0|0|0|0|0|0	0.75	1	0.75	1	0.75	0.73	40	0.07	Helka	9 / 716	1.3	2	9	TRUE	IntAct	pubmed:35140242|imex:IM-28767|pubmed:35140242|imex:IM-28767	intact-miscore:0.42|intact-miscore:0.42
PRDM1	BioID	O75626	Q9Y5L4	Prey	O75626_Q9Y5L4	TIMM13	Mitochondrial import inner membrane translocase subunit Tim13	TIMM13 TIM13B TIMM13A TIMM13B	95	protein insertion into mitochondrial inner membrane [GO:0045039]; protein targeting to mitochondrion [GO:0006626]; sensory perception of sound [GO:0007605]	fibrillar center [GO:0001650]; mitochondrial inner membrane [GO:0005743]; mitochondrial intermembrane space [GO:0005758]; mitochondrial intermembrane space protein transporter complex [GO:0042719]; mitochondrion [GO:0005739]	zinc ion binding [GO:0008270]	2|2|3|4	11	2.75	4	0|0|1|0|1|0|0|0|0|0|0|0|0|0|0|0|0|0|0|0|0|0|0|0|0|0|0|0|0|1|0|0|0|0|0|0|0|0|0|0|0|0|0|0	0.97	1	0.97	1	0.97	2.76	27.5	0.01	Helka	148 / 716	4.9	41	148	TRUE	IntAct	pubmed:35140242|imex:IM-28767	intact-miscore:0.27
PRDM1	BioID	O75626	Q9Y618	Prey	O75626_Q9Y618	NCOR2	Nuclear receptor corepressor 2 (N-CoR2) (CTG repeat protein 26) (SMAP270) (Silencing mediator of retinoic acid and thyroid hormone receptor) (SMRT) (T3 receptor-associating factor) (TRAC) (Thyroid-, retinoic-acid-receptor-associated corepressor)	NCOR2 CTG26	2514	cerebellum development [GO:0021549]; estrous cycle [GO:0044849]; lactation [GO:0007595]; negative regulation of androgen receptor signaling pathway [GO:0060766]; negative regulation of DNA-templated transcription [GO:0045892]; negative regulation of miRNA transcription [GO:1902894]; negative regulation of transcription by RNA polymerase II [GO:0000122]; regulation of cellular ketone metabolic pro…	chromatin [GO:0000785]; membrane [GO:0016020]; nuclear body [GO:0016604]; nuclear matrix [GO:0016363]; nucleoplasm [GO:0005654]; nucleus [GO:0005634]; transcription repressor complex [GO:0017053]	chromatin binding [GO:0003682]; DNA binding [GO:0003677]; histone deacetylase binding [GO:0042826]; Notch binding [GO:0005112]; nuclear glucocorticoid receptor binding [GO:0035259]; nuclear retinoid X receptor binding [GO:0046965]; transcription corepressor activity [GO:0003714]	31|26|21|19	97	24.25	4	4|6|4|2|2|1|6|2|7|5|0|0|0|0|0|0|0|0|0|0|0|0|0|0|0|0|17|9|0|0|9|6|0|0|0|0|0|0|0|0|4|3|0|0	0.98	0.99	0.98	0.99	0.98	3.18	12.26	0	Helka	56 / 716	8.6	103	56	TRUE	IntAct	pubmed:35140242|imex:IM-28767	intact-miscore:0.27
FOS	BioID	P01100	O00159	Prey	P01100_O00159	MYO1C	Unconventional myosin-Ic (Myosin I beta) (MMI-beta) (MMIb)	MYO1C	1063	actin filament organization [GO:0007015]; cellular response to type II interferon [GO:0071346]; chromatin remodeling [GO:0006338]; positive regulation of cell migration [GO:0030335]; positive regulation of cell migration by vascular endothelial growth factor signaling pathway [GO:0038089]; positive regulation of cellular response to insulin stimulus [GO:1900078]; positive regulation of histone ac…	actin cytoskeleton [GO:0015629]; B-WICH complex [GO:0110016]; basal plasma membrane [GO:0009925]; brush border [GO:0005903]; cell cortex [GO:0005938]; cytoplasm [GO:0005737]; cytoplasmic vesicle membrane [GO:0030659]; cytosol [GO:0005829]; extracellular exosome [GO:0070062]; filamentous actin [GO:0031941]; lateral plasma membrane [GO:0016328]; membrane [GO:0016020]; membrane raft [GO:0045121]; mi…	actin filament binding [GO:0051015]; ATP binding [GO:0005524]; calmodulin binding [GO:0005516]; microfilament motor activity [GO:0000146]; signaling receptor binding [GO:0005102]; small GTPase binding [GO:0031267]	32|28|17|17	94	23.5	4	0|0|0|0|0|0|0|0|0|0|0|0|0|0|0|0|1|0|0|0|0|0|0|0|0|0|0|0|0|0|0|0|0|0|0|0|0|0|0|0|0|0|0|0	1	1	1	1	1	26.52	235	0	Helka	152 / 716	10.9	183	152	TRUE	IntAct	pubmed:35140242|imex:IM-28767	intact-miscore:0.27
FOS	BioID	P01100	O00264	Prey	P01100_O00264	PGRMC1	Membrane-associated progesterone receptor component 1 (mPR) (Dap1) (IZA)	PGRMC1 HPR6.6 PGRMC	195	heme biosynthetic process [GO:0006783]; positive regulation of protein localization to plasma membrane [GO:1903078]	cell body [GO:0044297]; endomembrane system [GO:0012505]; endoplasmic reticulum [GO:0005783]; extracellular region [GO:0005576]; membrane [GO:0016020]; mitochondrial outer membrane [GO:0005741]; neuron projection [GO:0043005]; neuronal cell body [GO:0043025]; plasma membrane [GO:0005886]; smooth endoplasmic reticulum membrane [GO:0030868]; specific granule membrane [GO:0035579]; synapse [GO:00452…	amyloid-beta binding [GO:0001540]; heme binding [GO:0020037]; metal ion binding [GO:0046872]; protein homodimerization activity [GO:0042803]; steroid binding [GO:0005496]	4|3|3|3	13	3.25	4	0|0|5|2|3|3|0|0|0|0|0|0|0|0|0|0|0|0|2|1|0|0|0|0|0|0|0|0|0|0|0|0|0|0|0|0|0|0|0|0|0|0|0|0	0.82	0.89	0.82	0.89	0.82	1.38	8.94	0.05	Helka	128 / 716	2.9	19	128	TRUE	IntAct	pubmed:35140242|imex:IM-28767	intact-miscore:0.27
FOS	BioID	P01100	O00512	Prey	P01100_O00512	BCL9	B-cell CLL/lymphoma 9 protein (B-cell lymphoma 9 protein) (Bcl-9) (Protein legless homolog)	BCL9	1426	canonical Wnt signaling pathway [GO:0060070]; myoblast differentiation [GO:0045445]; myotube differentiation involved in skeletal muscle regeneration [GO:0014908]; positive regulation of transcription by RNA polymerase II [GO:0045944]; skeletal muscle cell differentiation [GO:0035914]; somatic stem cell population maintenance [GO:0035019]; transcription by RNA polymerase II [GO:0006366]	beta-catenin-TCF complex [GO:1990907]; cis-Golgi network [GO:0005801]; nucleoplasm [GO:0005654]; sarcoplasm [GO:0016528]	beta-catenin binding [GO:0008013]; transcription coactivator activity [GO:0003713]	5|3|4|5	17	4.25	4	2|5|1|0|1|0|2|0|3|2|0|0|0|0|0|0|0|0|0|0|0|0|0|0|0|0|4|2|0|0|3|2|0|0|0|0|0|0|0|0|0|0|0|0	0.76	0.85	0.76	0.85	0.76	0.4	6.93	0.06	Helka	1 / 716	1	1	1	TRUE	IntAct	pubmed:35140242|imex:IM-28767	intact-miscore:0.27
FOS	BioID	P01100	O14497	Prey	P01100_O14497	ARID1A	AT-rich interactive domain-containing protein 1A (ARID domain-containing protein 1A) (B120) (BRG1-associated factor 250) (BAF250) (BRG1-associated factor 250a) (BAF250A) (Osa homolog 1) (hOSA1) (SWI-like protein) (SWI/SNF complex protein p270) (SWI/SNF-related, matrix-associated, actin-dependent regulator of chromatin subfamily F member 1) (hELD)	ARID1A BAF250 BAF250A C1orf4 OSA1 SMARCF1	2285	androgen receptor signaling pathway [GO:0030521]; chromatin remodeling [GO:0006338]; glucocorticoid receptor signaling pathway [GO:0042921]; intracellular estrogen receptor signaling pathway [GO:0030520]; nervous system development [GO:0007399]; nucleosome disassembly [GO:0006337]; positive regulation of cell differentiation [GO:0045597]; positive regulation of DNA-templated transcription [GO:004…	bBAF complex [GO:0140092]; brahma complex [GO:0035060]; chromatin [GO:0000785]; nBAF complex [GO:0071565]; npBAF complex [GO:0071564]; nucleoplasm [GO:0005654]; nucleus [GO:0005634]; SWI/SNF complex [GO:0016514]	DNA binding [GO:0003677]; nuclear receptor binding [GO:0016922]; transcription coactivator activity [GO:0003713]	70|74|78|69	291	72.75	4	23|26|17|5|20|10|15|4|18|4|3|3|2|1|1|0|2|0|0|0|0|0|1|1|1|2|30|40|5|4|20|24|1|0|7|8|4|9|0|0|19|17|3|5	0.99	0.99	0.99	0.99	0.99	4.54	9.02	0	Helka	129 / 716	7.7	51	129	TRUE	IntAct	pubmed:35140242|imex:IM-28767	intact-miscore:0.27
FOS	BioID	P01100	O14686	Prey	P01100_O14686	KMT2D	Histone-lysine N-methyltransferase 2D (Lysine N-methyltransferase 2D) (EC 2.1.1.364) (ALL1-related protein) (Myeloid/lymphoid or mixed-lineage leukemia protein 2)	KMT2D ALR MLL2 MLL4	5537	beta-catenin-TCF complex assembly [GO:1904837]; heterochromatin formation [GO:0031507]; methylation [GO:0032259]; oocyte growth [GO:0001555]; oogenesis [GO:0048477]; positive regulation of cell population proliferation [GO:0008284]; positive regulation of intracellular estrogen receptor signaling pathway [GO:0033148]; positive regulation of transcription by RNA polymerase II [GO:0045944]; regulat…	MLL3/4 complex [GO:0044666]; nucleoplasm [GO:0005654]; nucleus [GO:0005634]	DNA binding [GO:0003677]; histone binding [GO:0042393]; histone H3K4 methyltransferase activity [GO:0042800]; histone H3K4 monomethyltransferase activity [GO:0140945]; histone H3K4 trimethyltransferase activity [GO:0140999]; metal ion binding [GO:0046872]; transcription cis-regulatory region binding [GO:0000976]; transcription coactivator activity [GO:0003713]	67|66|75|66	274	68.5	4	4|2|6|6|7|3|1|1|3|3|1|1|2|1|0|0|0|0|0|0|1|1|0|1|0|0|7|12|1|0|7|9|0|0|0|1|0|2|0|0|4|6|0|0	1	1	1	1	1	14.56	32.41	0	Helka	41 / 716	1.6	5	41	TRUE	IntAct	pubmed:35140242|imex:IM-28767	intact-miscore:0.27
FOS	BioID	P01100	O15145	Prey	P01100_O15145	ARPC3	Actin-related protein 2/3 complex subunit 3 (Arp2/3 complex 21 kDa subunit) (p21-ARC)	ARPC3 ARC21	178	actin polymerization-dependent cell motility [GO:0070358]; Arp2/3 complex-mediated actin nucleation [GO:0034314]; cellular response to nerve growth factor stimulus [GO:1990090]; regulation of actin filament polymerization [GO:0030833]	actin cytoskeleton [GO:0015629]; Arp2/3 protein complex [GO:0005885]; cytosol [GO:0005829]; extracellular exosome [GO:0070062]; filamentous actin [GO:0031941]; focal adhesion [GO:0005925]; growth cone leading edge [GO:0061850]; lamellipodium [GO:0030027]; membrane [GO:0016020]; nucleus [GO:0005634]; site of double-strand break [GO:0035861]	actin binding [GO:0003779]; structural constituent of cytoskeleton [GO:0005200]	3|2|2|2	9	2.25	4	0|0|0|0|0|0|0|0|0|0|0|0|0|0|1|0|0|0|0|0|0|0|0|0|0|0|0|0|0|0|0|0|0|0|0|0|1|1|1|1|0|0|0|0	0.94	0.99	0.94	0.99	0.94	2.54	19.8	0.01	Helka	78 / 716	2.7	10	78	TRUE	IntAct	pubmed:35140242|imex:IM-28767	intact-miscore:0.27
FOS	BioID	P01100	O15164	Prey	P01100_O15164	TRIM24	Transcription intermediary factor 1-alpha (TIF1-alpha) (EC 2.3.2.27) (E3 ubiquitin-protein ligase TRIM24) (RING finger protein 82) (RING-type E3 ubiquitin transferase TIF1-alpha) (Tripartite motif-containing protein 24)	TRIM24 RNF82 TIF1 TIF1A	1050	calcium ion homeostasis [GO:0055074]; cellular response to estrogen stimulus [GO:0071391]; epithelial cell proliferation [GO:0050673]; negative regulation of DNA-templated transcription [GO:0045892]; negative regulation of epithelial cell proliferation [GO:0050680]; positive regulation of gene expression [GO:0010628]; protein catabolic process [GO:0030163]; protein ubiquitination [GO:0016567]; re…	cytosol [GO:0005829]; euchromatin [GO:0000791]; male germ cell nucleus [GO:0001673]; mitochondrion [GO:0005739]; nucleoplasm [GO:0005654]; nucleus [GO:0005634]; perichromatin fibrils [GO:0005726]	chromatin binding [GO:0003682]; estrogen response element binding [GO:0034056]; lysine-acetylated histone binding [GO:0070577]; nuclear receptor binding [GO:0016922]; p53 binding [GO:0002039]; protein kinase activity [GO:0004672]; signaling receptor binding [GO:0005102]; transcription coactivator activity [GO:0003713]; ubiquitin protein ligase activity [GO:0061630]; zinc ion binding [GO:0008270]	12|13|12|11	48	12	4	4|1|1|0|1|0|1|1|3|0|0|0|0|0|0|0|0|0|0|0|0|0|0|0|0|0|0|0|0|0|2|2|0|0|0|0|0|0|0|0|0|0|0|0	1	1	1	1	1	7.02	33	0	Helka	59 / 716	2.2	8	59	TRUE	IntAct	pubmed:35140242|imex:IM-28767	intact-miscore:0.27
FOS	BioID	P01100	O15550	Prey	P01100_O15550	KDM6A	Lysine-specific demethylase 6A (EC 1.14.11.68) (Histone demethylase UTX) (Ubiquitously-transcribed TPR protein on the X chromosome) (Ubiquitously-transcribed X chromosome tetratricopeptide repeat protein) ([histone H3]-trimethyl-L-lysine(27) demethylase 6A)	KDM6A UTX	1401	chromatin remodeling [GO:0006338]; regulation of gene expression [GO:0010468]	histone methyltransferase complex [GO:0035097]; MLL3/4 complex [GO:0044666]; nucleoplasm [GO:0005654]; nucleus [GO:0005634]	chromatin DNA binding [GO:0031490]; histone demethylase activity [GO:0032452]; histone H3K27me2/H3K27me3 demethylase activity [GO:0071558]; metal ion binding [GO:0046872]; RNA polymerase II cis-regulatory region sequence-specific DNA binding [GO:0000978]	21|23|29|22	95	23.75	4	3|1|3|0|4|0|2|1|1|1|0|0|0|0|0|0|0|0|0|0|0|0|0|0|0|0|0|0|0|0|2|3|0|0|0|0|0|0|0|0|2|1|0|0	1	1	1	1	1	12.43	43.54	0	Helka	15 / 716	1	1	15	TRUE	IntAct	pubmed:35140242|imex:IM-28767	intact-miscore:0.27
FOS	BioID	P01100	O43795	Prey	P01100_O43795	MYO1B	Unconventional myosin-Ib (MYH-1c) (Myosin I alpha) (MMI-alpha) (MMIa)	MYO1B	1136	actin filament bundle assembly [GO:0051017]; actin filament organization [GO:0007015]; actin filament-based movement [GO:0030048]; post-Golgi vesicle-mediated transport [GO:0006892]; vesicle transport along actin filament [GO:0030050]	actin cytoskeleton [GO:0015629]; actin filament [GO:0005884]; apical part of cell [GO:0045177]; brush border [GO:0005903]; cell periphery [GO:0071944]; cytoplasm [GO:0005737]; early endosome [GO:0005769]; endosome membrane [GO:0010008]; extracellular exosome [GO:0070062]; filopodium [GO:0030175]; microvillus [GO:0005902]; myosin complex [GO:0016459]; perinuclear region of cytoplasm [GO:0048471]; …	actin filament binding [GO:0051015]; ATP binding [GO:0005524]; cadherin binding [GO:0045296]; calmodulin binding [GO:0005516]; microfilament motor activity [GO:0000146]; phosphatidylinositol-3,4,5-trisphosphate binding [GO:0005547]; phosphatidylinositol-4,5-bisphosphate binding [GO:0005546]	42|47|42|37	168	42	4	0|0|0|0|0|0|0|0|0|0|0|0|1|0|2|1|1|0|0|0|0|0|0|0|0|0|0|0|0|0|0|0|0|0|0|0|0|0|2|5|0|1|0|1	1	1	1	1	1	18.01	132	0	Helka	159 / 716	12.4	66	159	TRUE	IntAct	pubmed:35140242|imex:IM-28767	intact-miscore:0.27
FOS	BioID	P01100	O75083	Prey	P01100_O75083	WDR1	WD repeat-containing protein 1 (Actin-interacting protein 1) (AIP1) (NORI-1)	WDR1	606	actin filament depolymerization [GO:0030042]; actin filament fragmentation [GO:0030043]; apical junction assembly [GO:0043297]; cortical cytoskeleton organization [GO:0030865]; establishment of planar polarity of follicular epithelium [GO:0042247]; locomotion [GO:0040011]; maintenance of epithelial cell apical/basal polarity [GO:0045199]; neutrophil mediated immunity [GO:0002446]; neutrophil migr…	cell junction [GO:0030054]; cell projection [GO:0042995]; cell-cell junction [GO:0005911]; cortical actin cytoskeleton [GO:0030864]; cytosol [GO:0005829]; extracellular exosome [GO:0070062]; extracellular region [GO:0005576]; plasma membrane [GO:0005886]; podosome [GO:0002102]	actin filament binding [GO:0051015]	8|6|6|5	25	6.25	4	0|0|0|0|0|0|0|0|0|0|0|0|0|0|0|0|0|0|0|0|0|0|0|0|0|0|0|0|0|0|0|0|0|0|0|0|0|0|0|0|0|0|0|0	1	1	1	1	1	8.02	62.5	0	Helka	89 / 716	6.1	49	89	TRUE	IntAct	pubmed:35140242|imex:IM-28767	intact-miscore:0.27
FOS	BioID	P01100	O75177	Prey	P01100_O75177	SS18L1	Calcium-responsive transactivator (SS18-like protein 1) (SYT homolog 1)	SS18L1 CREST KIAA0693	396	chromatin organization [GO:0006325]; dendrite development [GO:0016358]; positive regulation of dendrite morphogenesis [GO:0050775]; positive regulation of DNA-templated transcription [GO:0045893]; positive regulation of transcription by RNA polymerase II [GO:0045944]	cytosol [GO:0005829]; kinetochore [GO:0000776]; nBAF complex [GO:0071565]; nucleoplasm [GO:0005654]; nucleus [GO:0005634]	transcription coactivator activity [GO:0003713]	5|3|3|5	16	4	4	0|0|0|0|0|0|0|0|0|0|0|0|0|0|0|0|0|0|0|0|0|0|0|0|0|0|0|0|0|0|0|0|0|0|0|0|0|0|0|0|0|0|0|0	0.99	1	0.99	1	0.99	4.6	40	0	Helka	17 / 716	1.8	3	17	TRUE	IntAct	pubmed:35140242|imex:IM-28767	intact-miscore:0.27
FOS	BioID	P01100	O94832	Prey	P01100_O94832	MYO1D	Unconventional myosin-Id	MYO1D KIAA0727	1006	actin filament organization [GO:0007015]; cellular localization [GO:0051641]; early endosome to recycling endosome transport [GO:0061502]; protein transport [GO:0015031]; vesicle transport along actin filament [GO:0030050]	actin cytoskeleton [GO:0015629]; apical dendrite [GO:0097440]; axolemma [GO:0030673]; axon [GO:0030424]; basolateral plasma membrane [GO:0016323]; brush border [GO:0005903]; cell cortex [GO:0005938]; cytoplasm [GO:0005737]; cytoplasmic vesicle [GO:0031410]; cytosol [GO:0005829]; early endosome [GO:0005769]; endosome [GO:0005768]; extracellular exosome [GO:0070062]; microvillus [GO:0005902]; myeli…	actin filament binding [GO:0051015]; ATP binding [GO:0005524]; calcium-dependent protein binding [GO:0048306]; calmodulin binding [GO:0005516]; microfilament motor activity [GO:0000146]; protein domain specific binding [GO:0019904]	51|46|32|31	160	40	4	0|0|0|0|0|0|0|0|1|0|0|0|0|0|0|0|0|1|0|0|0|0|0|0|0|0|0|0|0|0|0|0|0|0|0|0|0|0|3|5|0|0|0|0	1	1	1	1	1	12.02	176	0	Helka	57 / 716	22.8	160	57	TRUE	IntAct	pubmed:35140242|imex:IM-28767	intact-miscore:0.27
FOS	BioID	P01100	O95425	Prey	P01100_O95425	SVIL	Supervillin (Archvillin) (p205/p250)	SVIL	2214	actin filament severing [GO:0051014]; actin polymerization or depolymerization [GO:0008154]; barbed-end actin filament capping [GO:0051016]; positive regulation of cytokinesis [GO:0032467]; skeletal muscle tissue development [GO:0007519]	actin cytoskeleton [GO:0015629]; cell projection [GO:0042995]; cleavage furrow [GO:0032154]; costamere [GO:0043034]; cytoplasm [GO:0005737]; cytosol [GO:0005829]; focal adhesion [GO:0005925]; microtubule minus-end [GO:0036449]; midbody [GO:0030496]; nucleus [GO:0005634]; plasma membrane [GO:0005886]; podosome [GO:0002102]	actin filament binding [GO:0051015]; phosphatidylinositol-4,5-bisphosphate binding [GO:0005546]	8|10|9|4	31	7.75	4	0|0|0|0|0|0|0|0|0|0|0|1|1|2|1|1|0|0|0|0|0|0|0|0|0|0|0|0|0|0|0|0|0|0|0|0|0|1|0|0|0|0|0|0	1	1	1	1	1	5.96	48.71	0	Helka	77 / 716	4.9	52	77	TRUE	IntAct	pubmed:35140242|imex:IM-28767	intact-miscore:0.27
FOS	BioID	P01100	O95785	Prey	P01100_O95785	WIZ	Protein Wiz (Widely-interspaced zinc finger-containing protein) (Zinc finger protein 803)	WIZ ZNF803	1651	positive regulation of nuclear cell cycle DNA replication [GO:0010571]; protein stabilization [GO:0050821]; regulation of transcription by RNA polymerase II [GO:0006357]	extracellular exosome [GO:0070062]; midbody [GO:0030496]; nucleoplasm [GO:0005654]; nucleus [GO:0005634]	DNA-binding transcription factor activity, RNA polymerase II-specific [GO:0000981]; histone methyltransferase binding [GO:1990226]; metal ion binding [GO:0046872]; protein-containing complex binding [GO:0044877]; RNA polymerase II cis-regulatory region sequence-specific DNA binding [GO:0000978]; transcription corepressor binding [GO:0001222]	10|11|11|12	44	11	4	8|10|3|3|3|5|9|2|10|2|0|0|0|0|0|0|0|0|0|0|0|0|0|0|0|0|11|6|0|0|6|9|0|0|0|0|1|1|0|0|1|4|0|0	0.81	0.84	0.81	0.84	0.81	1.18	5.15	0.05	Helka	111 / 716	6.9	38	111	TRUE	IntAct	pubmed:35140242|imex:IM-28767	intact-miscore:0.27
FOS	BioID	P01100	P01100	Bait	P01100_P01100	FOS	Protein c-Fos (Cellular oncogene fos) (Fos proto-oncogene, AP-1 transcription factor subunit) (G0/G1 switch regulatory protein 7) (Proto-oncogene c-Fos) (Transcription factor AP-1 subunit c-Fos)	FOS G0S7	380	cellular response to cadmium ion [GO:0071276]; cellular response to calcium ion [GO:0071277]; cellular response to epidermal growth factor stimulus [GO:0071364]; cellular response to hypoxia [GO:0071456]; cellular response to parathyroid hormone stimulus [GO:0071374]; cellular response to phorbol 13-acetate 12-myristate [GO:1904628]; cellular response to prolactin [GO:1990646]; cellular response …	chromatin [GO:0000785]; cytosol [GO:0005829]; endoplasmic reticulum [GO:0005783]; nucleoplasm [GO:0005654]; nucleus [GO:0005634]; protein-DNA complex [GO:0032993]; RNA polymerase II transcription regulator complex [GO:0090575]; transcription factor AP-1 complex [GO:0035976]	chromatin binding [GO:0003682]; DNA-binding transcription activator activity, RNA polymerase II-specific [GO:0001228]; DNA-binding transcription factor activity [GO:0003700]; DNA-binding transcription factor activity, RNA polymerase II-specific [GO:0000981]; identical protein binding [GO:0042802]; R-SMAD binding [GO:0070412]; RNA polymerase II cis-regulatory region sequence-specific DNA binding […	16|21|18|16	71	17.75	4	0|0|0|0|0|0|0|0|0|0|0|0|0|0|0|0|0|0|0|0|0|0|0|0|0|0|0|0|0|0|0|0|0|0|0|0|0|0|0|0|0|0|0|0	1	1	1	1	1	25.03	177.5	0	Helka	1 / 716	1	1	1	TRUE	IntAct	imex:IM-24178|pubmed:25609649|imex:IM-24178|pubmed:25609649|imex:IM-24178|pubmed:25609649|imex:IM-24178|pubmed:25609649|pubmed:23661758|imex:IM-28626|pubmed:23661758|imex:IM-28626	intact-miscore:0.59|intact-miscore:0.59|intact-miscore:0.59|intact-miscore:0.59|intact-miscore:0.59|intact-miscore:0.59
FOS	BioID	P01100	P05412	Prey	P01100_P05412	JUN	Transcription factor Jun (Activator protein 1) (AP1) (Proto-oncogene c-Jun) (Transcription factor AP-1 subunit Jun) (V-jun avian sarcoma virus 17 oncogene homolog) (p39)	JUN	331	cellular response to cadmium ion [GO:0071276]; cellular response to reactive oxygen species [GO:0034614]; integrated stress response signaling [GO:0140467]; negative regulation by host of viral transcription [GO:0043922]; negative regulation of DNA binding [GO:0043392]; negative regulation of DNA-templated transcription [GO:0045892]; negative regulation of transcription by RNA polymerase II [GO:0…	chromatin [GO:0000785]; euchromatin [GO:0000791]; nuclear chromosome [GO:0000228]; nucleoplasm [GO:0005654]; nucleus [GO:0005634]; RNA polymerase II transcription regulator complex [GO:0090575]; transcription factor AP-1 complex [GO:0035976]; transcription regulator complex [GO:0005667]	cAMP response element binding [GO:0035497]; DNA binding [GO:0003677]; DNA-binding transcription activator activity, RNA polymerase II-specific [GO:0001228]; DNA-binding transcription factor activity [GO:0003700]; DNA-binding transcription factor activity, RNA polymerase II-specific [GO:0000981]; DNA-binding transcription repressor activity, RNA polymerase II-specific [GO:0001227]; enzyme binding …	9|6|8|6	29	7.25	4	0|0|0|0|0|0|0|0|0|0|0|0|0|0|0|0|0|0|0|0|0|0|0|0|0|0|0|0|0|0|0|0|0|0|0|0|0|0|0|0|0|0|0|0	1	1	1	1	1	9.66	72.5	0	Helka	21 / 716	3.4	11	21	TRUE	IntAct	mint:MINT-5220967|pubmed:8617242|imex:IM-14010|pubmed:20195357|imex:IM-20475|pubmed:20195357|imex:IM-20475|pubmed:20195357|imex:IM-20475|pubmed:20195357|imex:IM-20475|pubmed:20195357|imex:IM-20475|mint:MINT-8077644|pubmed:21199371|mint:fj-10-1075|doi:10.1111/j.1742-4658.2010.07988|mint:MINT-8077644|pubmed:21199371|mint:fj-10-1075|doi:10.1111/j.1742-4658.2010.07988|mint:MINT-8077644|pubmed:2119937…	intact-miscore:0.97|author score:class1|intact-miscore:0.97|author score:class1|intact-miscore:0.97|intact-miscore:0.97|intact-miscore:0.97|intact-miscore:0.97|intact-miscore:0.97|intact-miscore:0.97|intact-miscore:0.97|intact-miscore:0.97|intact-miscore:0.97|intact-miscore:0.97|intact-miscore:0.97|intact-miscore:0.97|intact-miscore:0.97|intact-miscore:0.97|intact-miscore:0.97|intact-miscore:0.97…
FOS	BioID	P01100	P06753	Prey	P01100_P06753	TPM3	Tropomyosin alpha-3 chain (Gamma-tropomyosin) (Tropomyosin-3) (Tropomyosin-5) (hTM5)	TPM3	285	actin filament organization [GO:0007015]; muscle contraction [GO:0006936]	actin cytoskeleton [GO:0015629]; actin filament [GO:0005884]; cytoskeleton [GO:0005856]; cytosol [GO:0005829]; extracellular exosome [GO:0070062]; muscle thin filament tropomyosin [GO:0005862]; stress fiber [GO:0001725]	actin filament binding [GO:0051015]	21|23|23|21	88	22	4	4|2|0|0|0|0|0|0|2|0|6|1|1|0|10|8|12|5|4|2|3|4|2|0|2|2|0|0|2|1|1|0|4|4|3|2|3|3|24|22|0|0|3|3	0.92	0.93	0.92	0.93	0.92	2.32	6.68	0.02	Helka	354 / 716	6.4	59	354	TRUE	IntAct	pubmed:35140242|imex:IM-28767	intact-miscore:0.27
FOS	BioID	P01100	P09493	Prey	P01100_P09493	TPM1	Tropomyosin alpha-1 chain (Alpha-tropomyosin) (Tropomyosin-1)	TPM1 C15orf13 TMSA	284	actin filament organization [GO:0007015]; cardiac muscle contraction [GO:0060048]; cellular response to reactive oxygen species [GO:0034614]; cytoskeleton organization [GO:0007010]; muscle filament sliding [GO:0030049]; negative regulation of cell migration [GO:0030336]; negative regulation of vascular associated smooth muscle cell migration [GO:1904753]; negative regulation of vascular associate…	actin cytoskeleton [GO:0015629]; actin filament [GO:0005884]; bleb [GO:0032059]; cytoskeleton [GO:0005856]; cytosol [GO:0005829]; muscle thin filament tropomyosin [GO:0005862]; ruffle membrane [GO:0032587]; sarcomere [GO:0030017]; stress fiber [GO:0001725]	actin binding [GO:0003779]; actin filament binding [GO:0051015]; cytoskeletal protein binding [GO:0008092]; identical protein binding [GO:0042802]; protein heterodimerization activity [GO:0046982]; protein homodimerization activity [GO:0042803]; structural constituent of cytoskeleton [GO:0005200]; structural constituent of muscle [GO:0008307]	18|21|20|20	79	19.75	4	0|0|2|2|2|0|0|0|0|0|0|0|0|0|8|6|9|0|0|0|0|0|0|0|0|0|0|0|0|0|0|0|0|0|0|0|0|0|20|13|0|0|3|0	0.97	0.97	0.97	0.97	0.97	3.17	13.37	0.01	Helka	283 / 716	4	34	283	TRUE	IntAct	pubmed:35140242|imex:IM-28767	intact-miscore:0.27
FOS	BioID	P01100	P0DP24	Prey	P01100_P0DP24	CALM2	Calmodulin-2	CALM2 CAM2 CAMB	149	detection of calcium ion [GO:0005513]; G protein-coupled receptor signaling pathway [GO:0007186]; G2/M transition of mitotic cell cycle [GO:0000086]; negative regulation of calcium ion export across plasma membrane [GO:1905913]; negative regulation of calcium ion transmembrane transporter activity [GO:1901020]; negative regulation of peptidyl-threonine phosphorylation [GO:0010801]; negative regul…	calcium channel complex [GO:0034704]; catalytic complex [GO:1902494]; centrosome [GO:0005813]; cytoplasm [GO:0005737]; membrane [GO:0016020]; myelin sheath [GO:0043209]; nucleus [GO:0005634]; plasma membrane [GO:0005886]; protein-containing complex [GO:0032991]; sarcomere [GO:0030017]; sperm midpiece [GO:0097225]; spindle microtubule [GO:0005876]; spindle pole [GO:0000922]; vesicle [GO:0031982]; …	adenylate cyclase activator activity [GO:0010856]; adenylate cyclase binding [GO:0008179]; calcium channel inhibitor activity [GO:0019855]; calcium ion binding [GO:0005509]; calcium-dependent protein binding [GO:0048306]; protein kinase binding [GO:0019901]; protein phosphatase activator activity [GO:0072542]; protein serine/threonine kinase activator activity [GO:0043539]; titin binding [GO:0031…	13|13|15|15	56	14	4	3|2|5|1|8|2|3|2|2|2|3|2|4|3|5|6|5|5|5|6|5|7|3|4|2|0|1|1|0|0|0|0|3|2|3|3|5|4|9|8|1|1|2|0	0.96	0.98	0.96	0.98	0.96	2.81	4.46	0.01	Helka	327 / 716	6.3	245	327	TRUE	IntAct	pubmed:35140242|imex:IM-28767	intact-miscore:0.27
FOS	BioID	P01100	P14625	Prey	P01100_P14625	HSP90B1	Endoplasmin (94 kDa glucose-regulated protein) (GRP-94) (Heat shock protein 90 kDa beta member 1) (Tumor rejection antigen 1) (gp96 homolog)	HSP90B1 GRP94 TRA1	803	actin rod assembly [GO:0031247]; cellular response to ATP [GO:0071318]; cellular response to manganese ion [GO:0071287]; negative regulation of apoptotic process [GO:0043066]; protein folding [GO:0006457]; protein folding in endoplasmic reticulum [GO:0034975]; protein transport [GO:0015031]; regulation of phosphoprotein phosphatase activity [GO:0043666]; response to endoplasmic reticulum stress […	collagen-containing extracellular matrix [GO:0062023]; cytosol [GO:0005829]; endocytic vesicle lumen [GO:0071682]; endoplasmic reticulum [GO:0005783]; endoplasmic reticulum chaperone complex [GO:0034663]; endoplasmic reticulum lumen [GO:0005788]; endoplasmic reticulum membrane [GO:0005789]; extracellular exosome [GO:0070062]; extracellular region [GO:0005576]; focal adhesion [GO:0005925]; melanos…	ATP binding [GO:0005524]; ATP hydrolysis activity [GO:0016887]; ATP-dependent protein folding chaperone [GO:0140662]; calcium ion binding [GO:0005509]; low-density lipoprotein particle receptor binding [GO:0050750]; protein phosphatase binding [GO:0019903]; RNA binding [GO:0003723]; unfolded protein binding [GO:0051082]	17|13|12|16	58	14.5	4	3|4|13|7|10|7|7|3|7|3|5|3|5|4|0|0|0|0|0|2|2|2|6|10|2|0|0|0|0|1|0|0|0|0|2|0|0|0|5|6|3|0|5|4	0.85	0.94	0.85	0.94	0.85	1.08	4.87	0.04	Helka	460 / 716	14.4	96	460	TRUE	IntAct	pubmed:20195357|imex:IM-20475	author score:class2|intact-miscore:0.40
FOS	BioID	P01100	P14649	Prey	P01100_P14649	MYL6B	Myosin light chain 6B (Myosin light chain 1 slow-twitch muscle A isoform) (MLC1sa) (Smooth muscle and nonmuscle myosin light chain alkali 6B)	MYL6B MLC1SA	208	muscle contraction [GO:0006936]; muscle filament sliding [GO:0030049]; skeletal muscle tissue development [GO:0007519]	cytosol [GO:0005829]; extracellular exosome [GO:0070062]; muscle myosin complex [GO:0005859]; myosin complex [GO:0016459]; myosin II complex [GO:0016460]; unconventional myosin complex [GO:0016461]	calcium ion binding [GO:0005509]; cytoskeletal motor activity [GO:0003774]; structural constituent of muscle [GO:0008307]	13|12|19|18	62	15.5	4	0|0|0|0|0|0|0|0|0|0|0|0|0|0|0|0|0|0|0|0|0|0|0|0|0|0|0|0|0|0|0|0|0|0|0|0|0|0|6|3|0|0|0|0	1	1	1	1	1	5.64	75.78	0	Helka	332 / 716	2.2	24	332	TRUE	IntAct	pubmed:35140242|imex:IM-28767	intact-miscore:0.27
FOS	BioID	P01100	P15822	Prey	P01100_P15822	HIVEP1	Zinc finger protein 40 (Cirhin interaction protein) (CIRIP) (Gate keeper of apoptosis-activating protein) (GAAP) (Human immunodeficiency virus type I enhancer-binding protein 1) (HIV-EP1) (Major histocompatibility complex-binding protein 1) (MBP-1) (Positive regulatory domain II-binding factor 1) (PRDII-BF1)	HIVEP1 ZNF40	2718	BMP signaling pathway [GO:0030509]; negative regulation of transcription by RNA polymerase II [GO:0000122]; positive regulation of transcription by RNA polymerase II [GO:0045944]; regulation of transcription by RNA polymerase II [GO:0006357]	cytosol [GO:0005829]; mitochondrion [GO:0005739]; nuclear body [GO:0016604]; nucleoplasm [GO:0005654]; nucleus [GO:0005634]	DNA-binding transcription factor activity, RNA polymerase II-specific [GO:0000981]; DNA-binding transcription repressor activity, RNA polymerase II-specific [GO:0001227]; metal ion binding [GO:0046872]; RNA polymerase II cis-regulatory region sequence-specific DNA binding [GO:0000978]; sequence-specific double-stranded DNA binding [GO:1990837]	5|4|5|6	20	5	4	1|1|1|1|0|2|2|0|1|1|0|0|0|0|0|0|0|0|0|0|0|0|0|2|0|0|1|1|0|0|1|2|0|0|0|0|0|0|0|0|1|0|0|0	0.99	1	0.99	1	0.99	3.79	12.22	0	Helka	64 / 716	4.8	21	64	TRUE	IntAct	pubmed:35140242|imex:IM-28767	intact-miscore:0.27
FOS	BioID	P01100	P17535	Prey	P01100_P17535	JUND	Transcription factor JunD (Transcription factor AP-1 subunit JunD)	JUND	347	cellular response to calcium ion [GO:0071277]; gene expression [GO:0010467]; negative regulation of transcription by RNA polymerase II [GO:0000122]; osteoblast development [GO:0002076]; positive regulation of osteoblast differentiation [GO:0045669]; positive regulation of transcription by RNA polymerase II [GO:0045944]; regulation of cell cycle [GO:0051726]; regulation of cell population prolifer…	chromatin [GO:0000785]; nucleoplasm [GO:0005654]; nucleus [GO:0005634]; RNA polymerase II transcription regulator complex [GO:0090575]; transcription factor AP-1 complex [GO:0035976]; transcription regulator complex [GO:0005667]; transcription repressor complex [GO:0017053]	DNA-binding transcription activator activity, RNA polymerase II-specific [GO:0001228]; DNA-binding transcription factor activity, RNA polymerase II-specific [GO:0000981]; enzyme binding [GO:0019899]; RNA polymerase II cis-regulatory region sequence-specific DNA binding [GO:0000978]; sequence-specific double-stranded DNA binding [GO:1990837]; transcription cis-regulatory region binding [GO:0000976…	6|6|7|4	23	5.75	4	0|0|0|0|0|0|0|0|0|0|0|0|0|0|0|0|0|0|0|0|0|0|0|0|0|0|0|0|0|0|0|0|0|0|0|0|0|0|0|0|0|0|0|0	1	1	1	1	1	6.34	57.5	0	Helka	9 / 716	2.2	10	9	TRUE	IntAct	pubmed:20195357|imex:IM-20475|pubmed:20195357|imex:IM-20475|pubmed:20195357|imex:IM-20475|imex:IM-21527|pubmed:24029232|imex:IM-24178|pubmed:25609649|imex:IM-24178|pubmed:25609649|pubmed:20102225|imex:IM-25853|pubmed:20102225|imex:IM-25853|pubmed:26496610|imex:IM-24272|pubmed:28514442|doi:10.1038/nature22366|imex:IM-25778|pubmed:35140242|imex:IM-28767|pubmed:35140242|imex:IM-28767	author score:class1|intact-miscore:0.92|intact-miscore:0.92|intact-miscore:0.92|intact-miscore:0.92|intact-miscore:0.92|intact-miscore:0.92|intact-miscore:0.92|intact-miscore:0.92|intact-miscore:0.92|intact-miscore:0.92|intact-miscore:0.92|intact-miscore:0.92
FOS	BioID	P01100	P19105	Prey	P01100_P19105	MYL12A	Myosin regulatory light chain 12A (Epididymis secretory protein Li 24) (HEL-S-24) (MLC-2B) (Myosin RLC) (Myosin regulatory light chain 2, nonsarcomeric) (Myosin regulatory light chain MRLC3)	MYL12A MLCB MRLC3 RLC	171	platelet aggregation [GO:0070527]; protein localization to plasma membrane [GO:0072659]; regulation of cell shape [GO:0008360]	cytoplasm [GO:0005737]; cytosol [GO:0005829]; extracellular exosome [GO:0070062]; myosin II complex [GO:0016460]; stress fiber [GO:0001725]; Z disc [GO:0030018]	calcium ion binding [GO:0005509]; glutamate receptor binding [GO:0035254]	41|0|34|36	111	27.75	4	4|7|8|4|8|5|3|3|5|4|7|4|5|5|11|10|9|5|9|7|10|8|1|0|2|0|0|0|0|1|1|0|2|3|2|0|2|1|8|9|1|0|2|1	0.75	1	0.75	1	0.75	-17.37	6.9	0.06	Helka	294 / 716	5.6	81	294	TRUE	IntAct	pubmed:35140242|imex:IM-28767	intact-miscore:0.27
FOS	BioID	P01100	P27824	Prey	P01100_P27824	CANX	Calnexin (IP90) (Major histocompatibility complex class I antigen-binding protein p88) (p90)	CANX	592	clathrin-dependent endocytosis [GO:0072583]; protein folding [GO:0006457]; protein folding in endoplasmic reticulum [GO:0034975]; protein secretion [GO:0009306]; synaptic vesicle endocytosis [GO:0048488]; ubiquitin-dependent ERAD pathway [GO:0030433]; viral protein processing [GO:0019082]	endoplasmic reticulum [GO:0005783]; endoplasmic reticulum lumen [GO:0005788]; endoplasmic reticulum membrane [GO:0005789]; endoplasmic reticulum quality control compartment [GO:0044322]; extracellular exosome [GO:0070062]; lumenal side of endoplasmic reticulum membrane [GO:0098553]; melanosome [GO:0042470]; membrane [GO:0016020]; mitochondria-associated endoplasmic reticulum membrane [GO:0044233]…	calcium ion binding [GO:0005509]; carbohydrate binding [GO:0030246]; RNA binding [GO:0003723]; unfolded protein binding [GO:0051082]	9|9|12|10	40	10	4	0|0|5|1|3|1|1|1|1|1|1|1|3|2|3|2|0|0|1|2|1|1|0|0|0|0|0|0|0|1|0|0|0|0|0|0|0|0|0|0|0|0|1|1	1	1	1	1	1	5.58	12.94	0	Helka	310 / 716	7.9	76	310	TRUE	IntAct	pubmed:35140242|imex:IM-28767	intact-miscore:0.27
FOS	BioID	P01100	P30153	Prey	P01100_P30153	PPP2R1A	Serine/threonine-protein phosphatase 2A 65 kDa regulatory subunit A alpha isoform (Medium tumor antigen-associated 61 kDa protein) (PP2A subunit A isoform PR65-alpha) (PP2A subunit A isoform R1-alpha)	PPP2R1A	589	apoptotic process [GO:0006915]; ceramide metabolic process [GO:0006672]; chromosome segregation [GO:0007059]; female meiotic nuclear division [GO:0007143]; meiotic sister chromatid cohesion, centromeric [GO:0051754]; meiotic spindle elongation [GO:0051232]; mitotic sister chromatid separation [GO:0051306]; negative regulation of cell growth [GO:0030308]; negative regulation of MAPK cascade [GO:00…	chromosome, centromeric region [GO:0000775]; cytoplasm [GO:0005737]; cytosol [GO:0005829]; dendrite [GO:0030425]; extracellular exosome [GO:0070062]; glutamatergic synapse [GO:0098978]; lateral plasma membrane [GO:0016328]; membrane [GO:0016020]; microtubule cytoskeleton [GO:0015630]; mitochondrion [GO:0005739]; neuron projection [GO:0043005]; neuronal cell body [GO:0043025]; nucleus [GO:0005634]…	protein antigen binding [GO:1990405]; protein heterodimerization activity [GO:0046982]; protein phosphatase regulator activity [GO:0019888]; protein serine/threonine phosphatase activity [GO:0004722]	8|10|8|5	31	7.75	4	5|4|7|5|7|3|5|4|6|3|3|1|3|2|3|0|1|0|2|1|2|1|0|0|0|0|0|0|0|0|0|0|0|0|0|0|0|0|0|0|0|0|0|0	0.74	0.9	0.74	0.9	0.74	-0.19	5.01	0.07	Helka	316 / 716	5	35	316	TRUE	IntAct	pubmed:35140242|imex:IM-28767	intact-miscore:0.27
FOS	BioID	P01100	P35232	Prey	P01100_P35232	PHB1	Prohibitin 1	PHB1 PHB	272	activation of phospholipase C activity [GO:0007202]; activation of protein kinase C activity [GO:1990051]; antiviral innate immune response [GO:0140374]; B cell activation [GO:0042113]; CD40 signaling pathway [GO:0023035]; cellular response to interleukin-6 [GO:0071354]; DNA biosynthetic process [GO:0071897]; epigenetic regulation of gene expression [GO:0040029]; mitochondrion organization [GO:00…	cell surface [GO:0009986]; cytoplasm [GO:0005737]; early endosome [GO:0005769]; extracellular exosome [GO:0070062]; membrane [GO:0016020]; mitochondrial inner membrane [GO:0005743]; mitochondrial prohibitin complex [GO:0035632]; mitochondrion [GO:0005739]; nucleoplasm [GO:0005654]; nucleus [GO:0005634]; plasma membrane [GO:0005886]	complement component C3a binding [GO:0001850]; complement component C3b binding [GO:0001851]; enzyme binding [GO:0019899]; histone deacetylase binding [GO:0042826]; protein heterodimerization activity [GO:0046982]; proteinase activated receptor binding [GO:0031871]; transcription corepressor activity [GO:0003714]	8|5|9|11	33	8.25	4	0|0|4|5|3|2|0|0|0|0|0|0|0|1|1|2|0|0|0|0|0|1|0|0|0|0|0|0|0|0|0|0|0|0|0|0|0|0|0|0|0|0|0|0	0.97	0.99	0.97	0.99	0.97	2.29	19.11	0.01	Helka	269 / 716	5.4	33	269	TRUE	IntAct	pubmed:24380853|imex:IM-22026|pubmed:35140242|imex:IM-28767	intact-miscore:0.45|intact-miscore:0.45
FOS	BioID	P01100	P51531	Prey	P01100_P51531	SMARCA2	Probable global transcription activator SNF2L2 (EC 3.6.4.-) (ATP-dependent helicase SMARCA2) (BRG1-associated factor 190B) (BAF190B) (Protein brahma homolog) (hBRM) (SNF2-alpha) (SWI/SNF-related matrix-associated actin-dependent regulator of chromatin subfamily A member 2)	SMARCA2 BAF190B BRM SNF2A SNF2L2	1590	chromatin remodeling [GO:0006338]; negative regulation of cell differentiation [GO:0045596]; negative regulation of cell growth [GO:0030308]; negative regulation of cell population proliferation [GO:0008285]; negative regulation of DNA-templated transcription [GO:0045892]; negative regulation of transcription by RNA polymerase II [GO:0000122]; nervous system development [GO:0007399]; positive reg…	bBAF complex [GO:0140092]; brahma complex [GO:0035060]; chromatin [GO:0000785]; GBAF complex [GO:0140288]; intermediate filament cytoskeleton [GO:0045111]; intracellular membrane-bounded organelle [GO:0043231]; nBAF complex [GO:0071565]; npBAF complex [GO:0071564]; nucleoplasm [GO:0005654]; nucleus [GO:0005634]; SWI/SNF complex [GO:0016514]	ATP binding [GO:0005524]; ATP-dependent activity, acting on DNA [GO:0008094]; ATP-dependent chromatin remodeler activity [GO:0140658]; chromatin binding [GO:0003682]; DNA binding [GO:0003677]; helicase activity [GO:0004386]; histone binding [GO:0042393]; hydrolase activity [GO:0016787]; transcription cis-regulatory region binding [GO:0000976]; transcription coactivator activity [GO:0003713]	44|41|40|44	169	42.25	4	19|18|19|10|23|14|19|7|20|11|2|0|0|0|0|0|0|0|0|0|0|0|0|0|0|0|0|9|0|0|0|0|0|0|0|0|0|0|0|0|14|13|0|0	0.97	0.98	0.97	0.98	0.97	3.47	9.39	0.01	Helka	145 / 716	5.1	52	145	TRUE	IntAct	pubmed:35140242|imex:IM-28767	intact-miscore:0.27
FOS	BioID	P01100	P51532	Prey	P01100_P51532	SMARCA4	Transcription activator BRG1 (EC 3.6.4.-) (ATP-dependent helicase SMARCA4) (BRG1-associated factor 190A) (BAF190A) (Mitotic growth and transcription activator) (Protein BRG-1) (Protein brahma homolog 1) (SNF2-beta) (SWI/SNF-related matrix-associated actin-dependent regulator of chromatin subfamily A member 4)	SMARCA4 BAF190A BRG1 SNF2B SNF2L4	1647	chromatin remodeling [GO:0006338]; negative regulation of androgen receptor signaling pathway [GO:0060766]; negative regulation of cell differentiation [GO:0045596]; negative regulation of cell growth [GO:0030308]; negative regulation of DNA-templated transcription [GO:0045892]; negative regulation of transcription by RNA polymerase II [GO:0000122]; nervous system development [GO:0007399]; neural…	bBAF complex [GO:0140092]; chromatin [GO:0000785]; extracellular space [GO:0005615]; fibrillar center [GO:0001650]; GBAF complex [GO:0140288]; kinetochore [GO:0000776]; membrane [GO:0016020]; nBAF complex [GO:0071565]; npBAF complex [GO:0071564]; nuclear matrix [GO:0016363]; nucleolus [GO:0005730]; nucleoplasm [GO:0005654]; nucleus [GO:0005634]; protein-containing complex [GO:0032991]; RSC-type c…	ATP binding [GO:0005524]; ATP-dependent activity, acting on DNA [GO:0008094]; ATP-dependent chromatin remodeler activity [GO:0140658]; DNA binding [GO:0003677]; DNA polymerase binding [GO:0070182]; helicase activity [GO:0004386]; hydrolase activity [GO:0016787]; lysine-acetylated histone binding [GO:0070577]; nuclear androgen receptor binding [GO:0050681]; p53 binding [GO:0002039]; RNA binding [G…	62|79|70|72	283	70.75	4	36|38|39|20|45|24|36|12|37|19|4|3|2|0|8|5|9|2|4|3|5|4|4|4|4|6|22|23|10|8|19|22|0|2|8|8|6|15|0|0|38|40|13|22	0.95	0.98	0.95	0.98	0.95	2.12	4.95	0.01	Helka	183 / 716	8.6	84	183	TRUE	IntAct	pubmed:35140242|imex:IM-28767	intact-miscore:0.27
FOS	BioID	P01100	P61006	Prey	P01100_P61006	RAB8A	Ras-related protein Rab-8A (EC 3.6.5.2) (Oncogene c-mel)	RAB8A MEL RAB8	207	autophagy [GO:0006914]; axonogenesis [GO:0007409]; cellular response to insulin stimulus [GO:0032869]; cilium assembly [GO:0060271]; endocytic recycling [GO:0032456]; Golgi organization [GO:0007030]; Golgi vesicle fusion to target membrane [GO:0048210]; neurotransmitter receptor transport to postsynaptic membrane [GO:0098969]; neurotransmitter receptor transport, endosome to postsynaptic membrane…	centriole [GO:0005814]; centrosome [GO:0005813]; ciliary basal body [GO:0036064]; ciliary base [GO:0097546]; ciliary membrane [GO:0060170]; cilium [GO:0005929]; cytosol [GO:0005829]; dendritic spine [GO:0043197]; endosome [GO:0005768]; extracellular exosome [GO:0070062]; glutamatergic synapse [GO:0098978]; Golgi membrane [GO:0000139]; midbody [GO:0030496]; neuronal cell body [GO:0043025]; non-mot…	GDP binding [GO:0019003]; GTP binding [GO:0005525]; GTPase activity [GO:0003924]; myosin V binding [GO:0031489]; protein tyrosine kinase binding [GO:1990782]; small GTPase binding [GO:0031267]	3|4|0|3	10	2.5	4	0|0|0|0|0|0|0|0|0|0|0|0|0|0|0|0|0|0|0|0|0|0|0|0|0|0|0|0|0|0|0|0|0|0|0|0|0|0|0|0|0|0|0|1	0.74	1	0.74	1	0.74	-1.78	25	0.07	Helka	164 / 716	2.6	12	164	TRUE	IntAct	pubmed:35140242|imex:IM-28767	intact-miscore:0.27
FOS	BioID	P01100	P61158	Prey	P01100_P61158	ACTR3	Actin-related protein 3 (Actin-like protein 3)	ACTR3 ARP3	418	actin polymerization-dependent cell motility [GO:0070358]; Arp2/3 complex-mediated actin nucleation [GO:0034314]; asymmetric cell division [GO:0008356]; cellular response to type II interferon [GO:0071346]; cilium assembly [GO:0060271]; establishment or maintenance of cell polarity [GO:0007163]; meiotic chromosome movement towards spindle pole [GO:0016344]; meiotic cytokinesis [GO:0033206]; posit…	actin cytoskeleton [GO:0015629]; Arp2/3 protein complex [GO:0005885]; brush border [GO:0005903]; cell-cell junction [GO:0005911]; cytoplasm [GO:0005737]; cytosol [GO:0005829]; extracellular exosome [GO:0070062]; focal adhesion [GO:0005925]; lamellipodium [GO:0030027]; membrane [GO:0016020]; nucleus [GO:0005634]; site of double-strand break [GO:0035861]	actin binding [GO:0003779]; ATP binding [GO:0005524]; structural constituent of cytoskeleton [GO:0005200]	5|4|5|6	20	5	4	0|0|0|0|0|0|0|0|0|0|1|0|0|0|2|1|2|0|0|0|0|0|0|0|0|1|0|0|1|0|0|0|0|0|0|0|0|2|0|0|1|0|1|0	0.99	1	0.99	1	0.99	3.9	18.33	0	Helka	137 / 716	4.6	35	137	TRUE	IntAct	pubmed:35140242|imex:IM-28767	intact-miscore:0.27
FOS	BioID	P01100	P63151	Prey	P01100_P63151	PPP2R2A	Serine/threonine-protein phosphatase 2A 55 kDa regulatory subunit B alpha isoform (PP2A subunit B isoform B55-alpha) (PP2A subunit B isoform PR55-alpha) (PP2A subunit B isoform R2-alpha) (PP2A subunit B isoform alpha)	PPP2R2A	447	protein dephosphorylation [GO:0006470]; response to morphine [GO:0043278]	cytosol [GO:0005829]; glutamatergic synapse [GO:0098978]; nucleoplasm [GO:0005654]; protein phosphatase type 2A complex [GO:0000159]	protein phosphatase regulator activity [GO:0019888]	7|5|6|8	26	6.5	4	6|4|5|0|0|0|5|4|3|5|0|0|1|1|2|1|2|0|3|0|0|0|0|0|0|0|0|0|0|0|0|0|0|0|0|0|0|0|0|0|0|0|0|0	0.82	0.91	0.82	0.91	0.82	0.93	6.81	0.04	Helka	304 / 716	4.9	39	304	TRUE	IntAct	pubmed:35140242|imex:IM-28767	intact-miscore:0.27
FOS	BioID	P01100	P67936	Prey	P01100_P67936	TPM4	Tropomyosin alpha-4 chain (TM30p1) (Tropomyosin-4)	TPM4	248	actin filament organization [GO:0007015]; muscle contraction [GO:0006936]; osteoblast differentiation [GO:0001649]	actin filament [GO:0005884]; cortical cytoskeleton [GO:0030863]; cytoskeleton [GO:0005856]; cytosol [GO:0005829]; extracellular exosome [GO:0070062]; focal adhesion [GO:0005925]; membrane [GO:0016020]; muscle thin filament tropomyosin [GO:0005862]; podosome [GO:0002102]; stress fiber [GO:0001725]	actin filament binding [GO:0051015]; calcium ion binding [GO:0005509]; identical protein binding [GO:0042802]; protein heterodimerization activity [GO:0046982]; protein homodimerization activity [GO:0042803]; structural constituent of muscle [GO:0008307]	20|19|21|21	81	20.25	4	0|0|2|0|0|1|2|0|0|1|5|2|4|4|7|7|7|0|3|2|3|4|0|0|3|2|0|0|0|0|1|0|3|3|5|0|2|0|26|19|1|1|2|5	0.92	0.93	0.92	0.93	0.92	2.25	7.02	0.02	Helka	311 / 716	4	32	311	TRUE	IntAct	pubmed:35140242|imex:IM-28767	intact-miscore:0.27
FOS	BioID	P01100	Q04724	Prey	P01100_Q04724	TLE1	Transducin-like enhancer protein 1 (E(Sp1) homolog) (Enhancer of split groucho-like protein 1) (ESG1)	TLE1	770	animal organ morphogenesis [GO:0009887]; negative regulation of anoikis [GO:2000811]; negative regulation of canonical NF-kappaB signal transduction [GO:0043124]; negative regulation of canonical Wnt signaling pathway [GO:0090090]; negative regulation of DNA-templated transcription [GO:0045892]; negative regulation of Wnt signaling pathway [GO:0030178]; positive regulation of gene expression [GO:…	beta-catenin-TCF complex [GO:1990907]; cytosol [GO:0005829]; nucleoplasm [GO:0005654]; nucleus [GO:0005634]; transcription regulator complex [GO:0005667]	DNA-binding transcription factor binding [GO:0140297]; identical protein binding [GO:0042802]; transcription corepressor activity [GO:0003714]	9|10|11|11	41	10.25	4	7|6|4|0|4|0|8|0|9|5|0|0|0|0|0|0|0|0|0|0|0|0|0|0|0|0|1|1|0|0|1|1|0|0|0|0|0|0|0|0|0|0|0|0	0.92	0.94	0.92	0.94	0.92	2.14	9.6	0.02	Helka	35 / 716	1.6	5	35	TRUE	IntAct	pubmed:35140242|imex:IM-28767	intact-miscore:0.27
FOS	BioID	P01100	Q04837	Prey	P01100_Q04837	SSBP1	Single-stranded DNA-binding protein, mitochondrial (Mt-SSB) (MtSSB) (PWP1-interacting protein 17)	SSBP1 SSBP	148	DNA unwinding involved in DNA replication [GO:0006268]; mitochondrial DNA replication [GO:0006264]; mitochondrion morphogenesis [GO:0070584]; positive regulation of helicase activity [GO:0051096]; positive regulation of mitochondrial DNA replication [GO:0090297]; protein homotetramerization [GO:0051289]	extracellular exosome [GO:0070062]; mitochondrial matrix [GO:0005759]; mitochondrial nucleoid [GO:0042645]; mitochondrion [GO:0005739]; nucleus [GO:0005634]	chromatin binding [GO:0003682]; identical protein binding [GO:0042802]; protein homodimerization activity [GO:0042803]; RNA binding [GO:0003723]; single-stranded DNA binding [GO:0003697]	4|4|4|4	16	4	4	0|0|0|0|0|0|0|0|0|0|0|0|0|0|0|0|0|0|0|0|0|0|0|0|0|0|0|0|0|0|0|0|0|0|0|0|0|0|0|0|0|0|0|0	1	1	1	1	1	6.34	40	0	Helka	169 / 716	3.4	18	169	TRUE	IntAct	pubmed:35140242|imex:IM-28767|pubmed:35140242|imex:IM-28767	intact-miscore:0.42|intact-miscore:0.42
FOS	BioID	P01100	Q08117	Prey	P01100_Q08117	TLE5	TLE family member 5 (Amino-terminal enhancer of split) (Amino enhancer of split) (Gp130-associated protein GAM) (Grg-5) (Groucho-related protein 5) (Protein ESP1) (Protein GRG) (TLE family member 5, transcriptional modulator)	TLE5 AES GRG GRG5	197	cellular response to extracellular stimulus [GO:0031668]; negative regulation of canonical Wnt signaling pathway [GO:0090090]; negative regulation of DNA-templated transcription [GO:0045892]; negative regulation of gene expression [GO:0010629]; negative regulation of protein binding [GO:0032091]; negative regulation of response to cytokine stimulus [GO:0060761]; negative regulation of transcripti…	nucleus [GO:0005634]	identical protein binding [GO:0042802]; transcription corepressor activity [GO:0003714]	3|2|4|4	13	3.25	4	0|2|2|0|1|0|0|0|0|1|0|0|0|0|0|0|0|0|0|0|0|0|0|0|0|0|2|1|0|0|2|2|0|0|1|0|0|0|0|0|0|0|0|0	0.85	0.96	0.85	0.96	0.85	0.54	10.21	0.04	Helka	1 / 716	1	1	1	TRUE	IntAct	pubmed:35140242|imex:IM-28767	intact-miscore:0.27
FOS	BioID	P01100	Q12824	Prey	P01100_Q12824	SMARCB1	SWI/SNF-related matrix-associated actin-dependent regulator of chromatin subfamily B member 1 (BRG1-associated factor 47) (BAF47) (Integrase interactor 1 protein) (SNF5 homolog) (hSNF5)	SMARCB1 BAF47 INI1 SNF5L1	385	blastocyst hatching [GO:0001835]; cell cycle [GO:0007049]; chromatin remodeling [GO:0006338]; DNA integration [GO:0015074]; hepatocyte differentiation [GO:0070365]; negative regulation of cell population proliferation [GO:0008285]; nervous system development [GO:0007399]; nucleosome disassembly [GO:0006337]; positive regulation by host of viral transcription [GO:0043923]; positive regulation of c…	bBAF complex [GO:0140092]; brahma complex [GO:0035060]; chromatin [GO:0000785]; fibrillar center [GO:0001650]; germ cell nucleus [GO:0043073]; intracellular membrane-bounded organelle [GO:0043231]; kinetochore [GO:0000776]; nBAF complex [GO:0071565]; npBAF complex [GO:0071564]; nuclear chromosome [GO:0000228]; nuclear matrix [GO:0016363]; nucleolus [GO:0005730]; nucleoplasm [GO:0005654]; nucleus …	DNA binding [GO:0003677]; identical protein binding [GO:0042802]; p53 binding [GO:0002039]; Tat protein binding [GO:0030957]; transcription coactivator activity [GO:0003713]	30|26|32|32	120	30	4	12|12|15|9|16|10|13|7|10|8|2|1|1|0|4|2|5|1|1|1|1|2|1|1|0|3|3|4|2|3|7|9|0|0|2|2|2|5|0|0|9|6|2|2	0.98	0.99	0.98	0.99	0.98	3.31	6.73	0	Helka	75 / 716	2	11	75	TRUE	IntAct	pubmed:35140242|imex:IM-28767	intact-miscore:0.27
FOS	BioID	P01100	Q12857	Prey	P01100_Q12857	NFIA	Nuclear factor 1 A-type (NF1-A) (Nuclear factor 1/A) (CCAAT-box-binding transcription factor) (CTF) (Nuclear factor I/A) (NF-I/A) (NFI-A) (TGGCA-binding protein)	NFIA KIAA1439	509	BMP signaling pathway [GO:0030509]; cartilage development [GO:0051216]; cell morphogenesis [GO:0000902]; DNA replication [GO:0006260]; exit from mitosis [GO:0010458]; gene expression [GO:0010467]; glial cell fate specification [GO:0021780]; glial cell proliferation [GO:0014009]; limb morphogenesis [GO:0035108]; neural precursor cell proliferation [GO:0061351]; neuron fate specification [GO:004866…	cell junction [GO:0030054]; chromatin [GO:0000785]; nucleoplasm [GO:0005654]; nucleus [GO:0005634]	chromatin binding [GO:0003682]; DNA-binding transcription activator activity, RNA polymerase II-specific [GO:0001228]; DNA-binding transcription factor activity [GO:0003700]; DNA-binding transcription factor activity, RNA polymerase II-specific [GO:0000981]; DNA-binding transcription factor binding [GO:0140297]; RNA polymerase II cis-regulatory region sequence-specific DNA binding [GO:0000978]	2|4|5|5	16	4	4	4|2|3|0|0|0|3|0|3|0|0|0|1|0|0|0|0|0|0|0|0|0|0|0|0|0|1|0|0|3|3|0|0|0|0|0|0|0|0|0|0|1|0|0	0.76	0.89	0.76	0.89	0.76	-0.17	7.33	0.06	Helka	71 / 716	2.6	19	71	TRUE	IntAct	pubmed:35140242|imex:IM-28767|pubmed:35140242|imex:IM-28767	intact-miscore:0.47|intact-miscore:0.47
FOS	BioID	P01100	Q15291	Prey	P01100_Q15291	RBBP5	Retinoblastoma-binding protein 5 (RBBP-5) (Retinoblastoma-binding protein RBQ-3)	RBBP5 RBQ3	538	DNA damage response [GO:0006974]; response to estrogen [GO:0043627]; transcription initiation-coupled chromatin remodeling [GO:0045815]	histone methyltransferase complex [GO:0035097]; MLL1 complex [GO:0071339]; MLL1/2 complex [GO:0044665]; MLL3/4 complex [GO:0044666]; nucleolus [GO:0005730]; nucleoplasm [GO:0005654]; nucleus [GO:0005634]; Set1C/COMPASS complex [GO:0048188]	histone binding [GO:0042393]; transcription cis-regulatory region binding [GO:0000976]	11|10|12|10	43	10.75	4	6|6|6|4|9|6|5|3|4|4|2|0|0|0|1|1|4|0|0|0|1|0|0|0|0|1|2|3|0|0|4|3|0|0|0|1|0|0|0|0|2|0|0|2	0.89	0.93	0.89	0.93	0.89	1.82	5.91	0.03	Helka	75 / 716	2	8	75	TRUE	IntAct	pubmed:35140242|imex:IM-28767	intact-miscore:0.27
FOS	BioID	P01100	Q15532	Prey	P01100_Q15532	SS18	Protein SSXT (Protein SYT) (Synovial sarcoma translocated to X chromosome protein)	SS18 SSXT SYT	418	cell morphogenesis [GO:0000902]; chromatin remodeling [GO:0006338]; ephrin receptor signaling pathway [GO:0048013]; intracellular signal transduction [GO:0035556]; microtubule cytoskeleton organization [GO:0000226]; negative regulation of cell differentiation [GO:0045596]; neuronal stem cell population maintenance [GO:0097150]; positive regulation of cell population proliferation [GO:0008284]; po…	chromatin [GO:0000785]; GBAF complex [GO:0140288]; microtubule cytoskeleton [GO:0015630]; npBAF complex [GO:0071564]; nucleus [GO:0005634]; SWI/SNF complex [GO:0016514]	nuclear receptor coactivator activity [GO:0030374]	3|3|3|3	12	3	4	0|1|1|0|2|0|1|0|1|0|0|0|0|0|0|0|0|0|0|0|0|0|0|1|0|0|1|1|0|0|1|1|0|0|0|1|0|0|0|0|1|0|0|0	0.91	0.91	0.91	0.91	0.91	2.25	10.15	0.02	Helka	57 / 716	2.3	6	57	TRUE	IntAct	pubmed:35140242|imex:IM-28767	intact-miscore:0.27
FOS	BioID	P01100	Q16643	Prey	P01100_Q16643	DBN1	Drebrin (Developmentally-regulated brain protein)	DBN1 D0S117E	649	actin filament organization [GO:0007015]; cell communication by chemical coupling [GO:0010643]; cell communication by electrical coupling [GO:0010644]; cytoplasmic sequestering of protein [GO:0051220]; generation of neurons [GO:0048699]; in utero embryonic development [GO:0001701]; maintenance of protein location in cell [GO:0032507]; neural precursor cell proliferation [GO:0061351]; positive reg…	actin cytoskeleton [GO:0015629]; actomyosin [GO:0042641]; cortical cytoskeleton [GO:0030863]; cytoplasm [GO:0005737]; cytoskeleton [GO:0005856]; dendrite [GO:0030425]; gap junction [GO:0005921]; glutamatergic synapse [GO:0098978]; growth cone [GO:0030426]; postsynaptic cytosol [GO:0099524]; postsynaptic density [GO:0014069]; postsynaptic membrane [GO:0045211]	actin binding [GO:0003779]; cadherin binding [GO:0045296]; profilin binding [GO:0005522]	28|29|31|28	116	29	4	0|1|0|0|0|0|0|0|0|0|0|1|1|1|3|5|4|1|0|0|0|0|0|0|2|1|0|0|0|0|0|0|0|1|1|1|0|1|2|1|0|0|0|1	1	1	1	1	1	17.07	45.57	0	Helka	204 / 716	16.1	403	204	TRUE	IntAct	pubmed:35140242|imex:IM-28767	intact-miscore:0.27
FOS	BioID	P01100	Q4VC05	Prey	P01100_Q4VC05	BCL7A	B-cell CLL/lymphoma 7 protein family member A	BCL7A	210	chromatin remodeling [GO:0006338]; negative regulation of cell differentiation [GO:0045596]; negative regulation of DNA-templated transcription [GO:0045892]; positive regulation of cell population proliferation [GO:0008284]; positive regulation of double-strand break repair [GO:2000781]; positive regulation of stem cell population maintenance [GO:1902459]; regulation of G0 to G1 transition [GO:00…	chromatin [GO:0000785]; GBAF complex [GO:0140288]; SWI/SNF complex [GO:0016514]		6|2|5|5	18	4.5	4	2|2|0|0|0|0|0|0|0|0|0|0|0|0|0|0|0|0|0|0|0|0|0|0|0|0|0|0|0|0|0|0|0|0|0|0|1|1|0|0|1|1|0|1	0.94	1	0.94	1	0.94	1.18	22	0.02	Helka	62 / 716	2.1	6	62	TRUE	IntAct	pubmed:35140242|imex:IM-28767	intact-miscore:0.27
FOS	BioID	P01100	Q68CP9	Prey	P01100_Q68CP9	ARID2	AT-rich interactive domain-containing protein 2 (ARID domain-containing protein 2) (BRG1-associated factor 200) (BAF200) (Zinc finger protein with activation potential) (Zipzap/p200)	ARID2 BAF200 KIAA1557	1835	cardiac muscle cell proliferation [GO:0060038]; chromatin remodeling [GO:0006338]; coronary artery morphogenesis [GO:0060982]; embryonic organ development [GO:0048568]; heart morphogenesis [GO:0003007]; homeostatic process [GO:0042592]; negative regulation of cell migration [GO:0030336]; negative regulation of cell population proliferation [GO:0008285]; nucleosome disassembly [GO:0006337]; positi…	chromatin [GO:0000785]; kinetochore [GO:0000776]; nuclear matrix [GO:0016363]; nucleoplasm [GO:0005654]; plasma membrane [GO:0005886]; RSC-type complex [GO:0016586]; SWI/SNF complex [GO:0016514]	DNA binding [GO:0003677]; metal ion binding [GO:0046872]	12|12|15|11	50	12.5	4	0|1|3|2|3|2|0|0|0|0|1|0|0|0|0|0|1|0|1|0|1|0|0|0|0|0|5|5|0|1|1|4|0|0|0|1|0|0|0|0|6|6|0|1	0.98	0.99	0.98	0.99	0.98	3.52	12.22	0	Helka	75 / 716	5.2	28	75	TRUE	IntAct	pubmed:35140242|imex:IM-28767	intact-miscore:0.27
FOS	BioID	P01100	Q6STE5	Prey	P01100_Q6STE5	SMARCD3	SWI/SNF-related matrix-associated actin-dependent regulator of chromatin subfamily D member 3 (60 kDa BRG-1/Brm-associated factor subunit C) (BRG1-associated factor 60C) (BAF60C)	SMARCD3 BAF60C	483	cardiac right ventricle formation [GO:0003219]; chromatin remodeling [GO:0006338]; muscle cell differentiation [GO:0042692]; nervous system development [GO:0007399]; neural retina development [GO:0003407]; nucleosome disassembly [GO:0006337]; positive regulation of cell differentiation [GO:0045597]; positive regulation of DNA-templated transcription [GO:0045893]; positive regulation of double-str…	brahma complex [GO:0035060]; chromatin [GO:0000785]; cytoplasm [GO:0005737]; nBAF complex [GO:0071565]; npBAF complex [GO:0071564]; nucleoplasm [GO:0005654]; nucleus [GO:0005634]; SWI/SNF complex [GO:0016514]	chromatin binding [GO:0003682]; DNA-binding transcription factor binding [GO:0140297]; nuclear receptor binding [GO:0016922]; nuclear receptor coactivator activity [GO:0030374]; signaling receptor binding [GO:0005102]; transcription coactivator activity [GO:0003713]; transcription coregulator activity [GO:0003712]; transcription coregulator binding [GO:0001221]	5|5|10|7	27	6.75	4	0|0|0|0|0|0|0|0|0|0|0|0|0|0|0|0|0|0|0|0|0|0|0|0|0|0|0|0|0|0|0|0|0|0|0|0|0|0|0|0|0|0|0|0	1	1	1	1	1	8.02	67.5	0	Helka	29 / 716	1.5	4	29	TRUE	IntAct	pubmed:35140242|imex:IM-28767	intact-miscore:0.27
FOS	BioID	P01100	Q6WCQ1	Prey	P01100_Q6WCQ1	MPRIP	Myosin phosphatase Rho-interacting protein (M-RIP) (Rho-interacting protein 3) (RIP3) (p116Rip)	MPRIP KIAA0864 MRIP RHOIP3	1025		actin cytoskeleton [GO:0015629]; cytosol [GO:0005829]; focal adhesion [GO:0005925]	actin filament binding [GO:0051015]; cadherin binding [GO:0045296]	20|21|23|15	79	19.75	4	0|0|0|0|0|0|0|0|0|0|1|0|0|0|1|0|1|0|0|0|0|0|0|0|0|0|0|0|1|1|0|0|0|0|1|1|0|4|3|2|0|0|0|0	1	1	1	1	1	10.09	54.31	0	Helka	86 / 716	5.3	35	86	TRUE	IntAct	pubmed:35140242|imex:IM-28767	intact-miscore:0.27
FOS	BioID	P01100	Q6ZW49	Prey	P01100_Q6ZW49	PAXIP1	PAX-interacting protein 1 (PAX transactivation activation domain-interacting protein)	PAXIP1 PAXIP1L PTIP CAGF28	1069	adipose tissue development [GO:0060612]; chorion development [GO:0060717]; chromatin remodeling [GO:0006338]; DNA damage response, signal transduction by p53 class mediator [GO:0030330]; DNA recombination [GO:0006310]; DNA repair [GO:0006281]; endothelial cell migration [GO:0043542]; negative regulation of DNA-binding transcription factor activity [GO:0043433]; positive regulation of isotype swit…	chromosome [GO:0005694]; histone methyltransferase complex [GO:0035097]; MLL3/4 complex [GO:0044666]; nuclear matrix [GO:0016363]; nucleoplasm [GO:0005654]; nucleus [GO:0005634]		14|15|17|16	62	15.5	4	4|2|6|2|3|2|4|2|3|2|0|0|0|0|0|0|0|0|0|0|0|0|0|0|0|0|2|3|0|0|0|3|0|0|0|0|0|0|0|0|2|0|0|0	1	1	1	1	1	5.72	17.05	0	Helka	17 / 716	1.2	3	17	TRUE	IntAct	pubmed:35140242|imex:IM-28767	intact-miscore:0.27
FOS	BioID	P01100	Q7Z406	Prey	P01100_Q7Z406	MYH14	Myosin-14 (Myosin heavy chain 14) (Myosin heavy chain, non-muscle IIc) (Non-muscle myosin heavy chain IIc) (NMHC II-C)	MYH14 KIAA2034 FP17425	1995	actin filament-based movement [GO:0030048]; actomyosin structure organization [GO:0031032]; mitochondrion morphogenesis [GO:0070584]; neuronal action potential [GO:0019228]; regulation of cell shape [GO:0008360]; sensory perception of sound [GO:0007605]; skeletal muscle contraction [GO:0003009]; skeletal muscle tissue development [GO:0007519]; vocalization behavior [GO:0071625]	actomyosin [GO:0042641]; brush border [GO:0005903]; cytoplasm [GO:0005737]; cytosol [GO:0005829]; extracellular exosome [GO:0070062]; growth cone [GO:0030426]; membrane [GO:0016020]; myosin filament [GO:0032982]; myosin II complex [GO:0016460]; myosin II filament [GO:0097513]; stress fiber [GO:0001725]	actin filament binding [GO:0051015]; ATP binding [GO:0005524]; calmodulin binding [GO:0005516]; microfilament motor activity [GO:0000146]	93|85|61|69	308	77	4	0|0|0|0|0|0|0|0|0|0|0|0|0|0|0|16|0|0|0|0|0|0|0|0|0|4|0|0|0|0|0|0|0|0|4|0|0|0|40|39|0|0|8|10	1	1	1	1	1	4.94	28	0	Helka	318 / 716	6.2	79	318	TRUE	IntAct	pubmed:35140242|imex:IM-28767	intact-miscore:0.27
FOS	BioID	P01100	Q86U86	Prey	P01100_Q86U86	PBRM1	Protein polybromo-1 (hPB1) (BRG1-associated factor 180) (BAF180) (Polybromo-1D)	PBRM1 BAF180 PB1	1689	chromatin remodeling [GO:0006338]; mitotic cell cycle [GO:0000278]; negative regulation of cell population proliferation [GO:0008285]; positive regulation of cell differentiation [GO:0045597]; positive regulation of double-strand break repair [GO:2000781]; positive regulation of myoblast differentiation [GO:0045663]; positive regulation of T cell differentiation [GO:0045582]; regulation of G0 to …	chromatin [GO:0000785]; kinetochore [GO:0000776]; nuclear chromosome [GO:0000228]; nuclear matrix [GO:0016363]; nucleoplasm [GO:0005654]; nucleus [GO:0005634]; RSC-type complex [GO:0016586]; SWI/SNF complex [GO:0016514]	chromatin binding [GO:0003682]; DNA binding [GO:0003677]	29|28|26|23	106	26.5	4	6|2|12|8|14|10|2|3|4|2|1|1|0|0|2|0|5|0|0|0|0|0|0|1|1|0|2|3|0|0|1|6|0|0|0|4|0|2|0|0|14|24|8|4	0.96	0.97	0.96	0.97	0.96	2.67	8.21	0.01	Helka	49 / 716	3	11	49	TRUE	IntAct	pubmed:35140242|imex:IM-28767	intact-miscore:0.27
FOS	BioID	P01100	Q8IVW6	Prey	P01100_Q8IVW6	ARID3B	AT-rich interactive domain-containing protein 3B (ARID domain-containing protein 3B) (Bright and dead ringer protein) (Bright-like protein)	ARID3B BDP DRIL2	561	positive regulation of transcription by RNA polymerase II [GO:0045944]; regulation of transcription by RNA polymerase II [GO:0006357]	nucleoplasm [GO:0005654]; nucleus [GO:0005634]	DNA binding [GO:0003677]	33|24|31|29	117	29.25	4	17|17|14|9|20|7|17|10|18|11|1|1|0|1|2|3|4|0|1|2|2|1|0|1|2|4|12|10|7|3|9|9|0|1|1|3|4|8|0|0|18|16|2|3	0.89	0.95	0.89	0.95	0.89	1.07	4.75	0.03	Helka	92 / 716	9	44	92	TRUE	IntAct	pubmed:35140242|imex:IM-28767	intact-miscore:0.27
FOS	BioID	P01100	Q8NEZ4	Prey	P01100_Q8NEZ4	KMT2C	Histone-lysine N-methyltransferase 2C (Lysine N-methyltransferase 2C) (EC 2.1.1.364) (Homologous to ALR protein) (Myeloid/lymphoid or mixed-lineage leukemia protein 3)	KMT2C HALR KIAA1506 MLL3	4911	methylation [GO:0032259]; positive regulation of transcription by RNA polymerase II [GO:0045944]; response to electrical stimulus [GO:0051602]	cytosol [GO:0005829]; histone methyltransferase complex [GO:0035097]; MLL3/4 complex [GO:0044666]; nucleoplasm [GO:0005654]; nucleus [GO:0005634]	acyltransferase activity [GO:0016746]; DNA binding [GO:0003677]; histone binding [GO:0042393]; histone H3K4 methyltransferase activity [GO:0042800]; histone H3K4 monomethyltransferase activity [GO:0140945]; histone H3K4 trimethyltransferase activity [GO:0140999]; histone methyltransferase activity [GO:0042054]; metal ion binding [GO:0046872]; RNA binding [GO:0003723]; transcription coactivator ac…	7|4|5|8	24	6	4	1|0|0|0|1|1|0|0|0|1|0|0|0|0|0|0|0|0|0|0|0|0|0|0|0|0|0|1|0|0|0|0|0|0|0|0|0|0|0|0|0|0|0|0	1	1	1	1	1	6.09	52.8	0	Helka	2 / 716	1	1	2	TRUE	IntAct	pubmed:35140242|imex:IM-28767	intact-miscore:0.27
FOS	BioID	P01100	Q8NFD5	Prey	P01100_Q8NFD5	ARID1B	AT-rich interactive domain-containing protein 1B (ARID domain-containing protein 1B) (BRG1-associated factor 250b) (BAF250B) (BRG1-binding protein hELD/OSA1) (Osa homolog 2) (hOsa2) (p250R)	ARID1B BAF250B DAN15 KIAA1235 OSA2	2319	cellular response to angiotensin [GO:1904385]; chromatin remodeling [GO:0006338]; nervous system development [GO:0007399]; positive regulation of cell differentiation [GO:0045597]; positive regulation of DNA-templated transcription [GO:0045893]; positive regulation of double-strand break repair [GO:2000781]; positive regulation of myoblast differentiation [GO:0045663]; positive regulation of T ce…	bBAF complex [GO:0140092]; brahma complex [GO:0035060]; chromatin [GO:0000785]; cytosol [GO:0005829]; nBAF complex [GO:0071565]; npBAF complex [GO:0071564]; nucleoplasm [GO:0005654]; plasma membrane [GO:0005886]; SWI/SNF complex [GO:0016514]	DNA binding [GO:0003677]; transcription coactivator activity [GO:0003713]	57|57|54|55	223	55.75	4	12|14|5|3|10|4|9|2|9|3|0|0|0|0|0|0|1|0|0|0|0|0|0|0|1|0|12|19|0|2|4|8|0|0|1|0|0|0|0|0|1|1|0|0	1	1	1	1	1	6.81	20.27	0	Helka	68 / 716	3.1	22	68	TRUE	IntAct	pubmed:35140242|imex:IM-28767	intact-miscore:0.27
FOS	BioID	P01100	Q8NHM5	Prey	P01100_Q8NHM5	KDM2B	Lysine-specific demethylase 2B (EC 1.14.11.27) (CXXC-type zinc finger protein 2) (F-box and leucine-rich repeat protein 10) (F-box protein FBL10) (F-box/LRR-repeat protein 10) (JmjC domain-containing histone demethylation protein 1B) (Jumonji domain-containing EMSY-interactor methyltransferase motif protein) (Protein JEMMA) (Protein-containing CXXC domain 2) ([Histone-H3]-lysine-36 demethylase 1B)	KDM2B CXXC2 FBL10 FBXL10 JHDM1B NDY1 PCCX2	1336	chromatin remodeling [GO:0006338]; embryonic camera-type eye morphogenesis [GO:0048596]; forebrain development [GO:0030900]; fourth ventricle development [GO:0021592]; hindbrain development [GO:0030902]; initiation of neural tube closure [GO:0021993]; lateral ventricle development [GO:0021670]; midbrain development [GO:0030901]; midbrain-hindbrain boundary morphogenesis [GO:0021555]; negative reg…	chromosome [GO:0005694]; nucleolus [GO:0005730]; nucleoplasm [GO:0005654]; nucleus [GO:0005634]; PcG protein complex [GO:0031519]	DNA binding [GO:0003677]; histone demethylase activity [GO:0032452]; histone H3K36 demethylase activity [GO:0051864]; histone H3K36me/H3K36me2 demethylase activity [GO:0140680]; RNA polymerase II cis-regulatory region sequence-specific DNA binding [GO:0000978]; rRNA binding [GO:0019843]; transcription coregulator activity [GO:0003712]; unmethylated CpG binding [GO:0045322]; zinc ion binding [GO:0…	6|9|7|9	31	7.75	4	1|3|1|0|4|2|2|2|4|2|0|0|0|0|0|0|1|0|0|1|1|0|0|0|0|0|5|5|0|0|0|0|0|0|0|0|0|0|0|0|2|1|0|0	0.93	0.97	0.93	0.97	0.93	1.8	9.22	0.02	Helka	23 / 716	1.5	4	23	TRUE	IntAct	pubmed:35140242|imex:IM-28767	intact-miscore:0.27
FOS	BioID	P01100	Q8TAQ2	Prey	P01100_Q8TAQ2	SMARCC2	SWI/SNF complex subunit SMARCC2 (BRG1-associated factor 170) (BAF170) (SWI/SNF complex 170 kDa subunit) (SWI/SNF-related matrix-associated actin-dependent regulator of chromatin subfamily C member 2)	SMARCC2 BAF170	1214	chromatin remodeling [GO:0006338]; negative regulation of DNA-templated transcription [GO:0045892]; nervous system development [GO:0007399]; nucleosome disassembly [GO:0006337]; positive regulation of cell differentiation [GO:0045597]; positive regulation of DNA-templated transcription [GO:0045893]; positive regulation of double-strand break repair [GO:2000781]; positive regulation of myoblast di…	bBAF complex [GO:0140092]; brahma complex [GO:0035060]; chromatin [GO:0000785]; kinetochore [GO:0000776]; nBAF complex [GO:0071565]; npBAF complex [GO:0071564]; nuclear matrix [GO:0016363]; nucleoplasm [GO:0005654]; protein-containing complex [GO:0032991]; RSC-type complex [GO:0016586]; SWI/SNF complex [GO:0016514]	histone binding [GO:0042393]; transcription coactivator activity [GO:0003713]	74|65|74|70	283	70.75	4	31|29|33|21|42|26|32|13|31|22|10|3|1|2|12|10|18|2|6|7|7|10|7|9|4|3|12|19|1|4|15|16|0|2|13|11|7|10|0|0|31|28|5|5	0.98	0.99	0.98	0.99	0.98	3.56	5.46	0	Helka	164 / 716	6.2	36	164	TRUE	IntAct	imex:IM-24178|pubmed:25609649|pubmed:35140242|imex:IM-28767	intact-miscore:0.48|intact-miscore:0.48
FOS	BioID	P01100	Q8WUZ0	Prey	P01100_Q8WUZ0	BCL7C	B-cell CLL/lymphoma 7 protein family member C	BCL7C	217	apoptotic process [GO:0006915]; chromatin remodeling [GO:0006338]; negative regulation of cell differentiation [GO:0045596]; positive regulation of cell population proliferation [GO:0008284]; positive regulation of double-strand break repair [GO:2000781]; positive regulation of stem cell population maintenance [GO:1902459]; regulation of G0 to G1 transition [GO:0070316]; regulation of G1/S transi…	chromatin [GO:0000785]; GBAF complex [GO:0140288]; SWI/SNF complex [GO:0016514]		4|3|5|5	17	4.25	4	1|0|0|0|0|0|1|0|0|0|0|0|0|0|0|0|0|0|0|0|0|0|0|0|0|0|1|2|0|0|0|0|0|0|0|0|0|0|0|0|0|0|0|0	0.99	1	0.99	1	0.99	4.11	37.4	0	Helka	58 / 716	1.6	4	58	TRUE	IntAct	pubmed:35140242|imex:IM-28767	intact-miscore:0.27
FOS	BioID	P01100	Q92614	Prey	P01100_Q92614	MYO18A	Unconventional myosin-XVIIIa (Molecule associated with JAK3 N-terminus) (MAJN) (Myosin containing a PDZ domain) (Surfactant protein receptor SP-R210) (SP-R210)	MYO18A CD245 KIAA0216 MYSPDZ TIAF1	2054	actomyosin structure organization [GO:0031032]; asymmetric Golgi ribbon formation [GO:0090164]; cell migration [GO:0016477]; DNA metabolic process [GO:0006259]; Golgi organization [GO:0007030]; Golgi ribbon formation [GO:0090161]; Golgi vesicle budding [GO:0048194]; negative regulation of apoptotic process [GO:0043066]; positive regulation of opsonization [GO:1903028]; positive regulation of prot…	actomyosin [GO:0042641]; cell surface [GO:0009986]; cytoplasm [GO:0005737]; endoplasmic reticulum-Golgi intermediate compartment [GO:0005793]; Golgi membrane [GO:0000139]; membrane [GO:0016020]; myosin filament [GO:0032982]; myosin II complex [GO:0016460]; trans-Golgi network [GO:0005802]	actin filament binding [GO:0051015]; ADP binding [GO:0043531]; ATP binding [GO:0005524]; ATP-dependent activity, acting on DNA [GO:0008094]; DNA binding [GO:0003677]; RNA binding [GO:0003723]	17|14|7|9	47	11.75	4	0|0|0|0|0|0|0|0|0|0|0|0|0|0|0|0|0|0|0|0|0|0|0|0|0|0|0|0|0|0|0|0|0|0|0|0|0|0|0|0|0|0|0|0	1	1	1	1	1	11.27	117.5	0	Helka	25 / 716	20.6	115	25	TRUE	IntAct	pubmed:35140242|imex:IM-28767	intact-miscore:0.27
FOS	BioID	P01100	Q92782	Prey	P01100_Q92782	DPF1	Zinc finger protein neuro-d4 (BRG1-associated factor 45B) (BAF45B) (D4, zinc and double PHD fingers family 1)	DPF1 BAF45B NEUD4	387	apoptotic process [GO:0006915]; chromatin remodeling [GO:0006338]; nervous system development [GO:0007399]; positive regulation of cell differentiation [GO:0045597]; positive regulation of double-strand break repair [GO:2000781]; regulation of G0 to G1 transition [GO:0070316]; regulation of G1/S transition of mitotic cell cycle [GO:2000045]; regulation of mitotic metaphase/anaphase transition [GO…	chromatin [GO:0000785]; cytoplasm [GO:0005737]; nBAF complex [GO:0071565]	metal ion binding [GO:0046872]; sequence-specific double-stranded DNA binding [GO:1990837]	11|10|9|10	40	10	4	0|0|2|0|0|0|0|0|0|0|0|0|0|0|0|0|0|0|0|0|0|0|0|0|0|0|0|0|0|0|0|1|0|0|0|0|0|0|0|0|0|0|0|0	1	1	1	1	1	18.32	100	0	Helka	5 / 716	1.2	2	5	TRUE	IntAct	pubmed:35140242|imex:IM-28767	intact-miscore:0.27
FOS	BioID	P01100	Q92785	Prey	P01100_Q92785	DPF2	Zinc finger protein ubi-d4 (Apoptosis response zinc finger protein) (BRG1-associated factor 45D) (BAF45D) (D4, zinc and double PHD fingers family 2) (Protein requiem)	DPF2 BAF45D REQ UBID4	391	apoptotic process [GO:0006915]; apoptotic signaling pathway [GO:0097190]; chromatin remodeling [GO:0006338]; negative regulation of myeloid progenitor cell differentiation [GO:1905454]; negative regulation of transcription by RNA polymerase II [GO:0000122]; nervous system development [GO:0007399]; positive regulation of double-strand break repair [GO:2000781]; positive regulation of stem cell pop…	centrosome [GO:0005813]; chromatin [GO:0000785]; cytosol [GO:0005829]; intracellular membrane-bounded organelle [GO:0043231]; nBAF complex [GO:0071565]; nucleoplasm [GO:0005654]; nucleus [GO:0005634]; SWI/SNF complex [GO:0016514]	H3K9me3 modified histone binding [GO:0062072]; lysine-acetylated histone binding [GO:0070577]; metal ion binding [GO:0046872]; transcription corepressor activity [GO:0003714]	31|26|26|27	110	27.5	4	9|7|7|3|10|4|8|3|8|3|1|1|0|1|0|0|1|0|1|0|0|0|2|1|0|1|5|5|2|5|8|8|0|0|4|4|1|1|0|0|8|8|1|1	1	1	1	1	1	5.41	9.17	0	Helka	44 / 716	2	6	44	TRUE	IntAct	pubmed:35140242|imex:IM-28767	intact-miscore:0.27
FOS	BioID	P01100	Q92793	Prey	P01100_Q92793	CREBBP	CREB-binding protein (Histone lysine acetyltransferase CREBBP) (EC 2.3.1.48) (Protein-lysine acetyltransferase CREBBP) (EC 2.3.1.-)	CREBBP CBP	2442	cellular response to nutrient levels [GO:0031669]; cellular response to UV [GO:0034644]; embryonic digit morphogenesis [GO:0042733]; homeostatic process [GO:0042592]; N-terminal peptidyl-lysine acetylation [GO:0018076]; negative regulation of transcription by RNA polymerase I [GO:0016479]; negative regulation of transcription by RNA polymerase II [GO:0000122]; non-canonical NF-kappaB signal trans…	chromatin [GO:0000785]; cytoplasm [GO:0005737]; cytosol [GO:0005829]; histone acetyltransferase complex [GO:0000123]; nuclear body [GO:0016604]; nucleoplasm [GO:0005654]; nucleus [GO:0005634]; transcription regulator complex [GO:0005667]	acetyltransferase activity [GO:0016407]; chromatin binding [GO:0003682]; chromatin DNA binding [GO:0031490]; damaged DNA binding [GO:0003684]; DNA-binding transcription factor binding [GO:0140297]; histone acetyltransferase activity [GO:0004402]; MRF binding [GO:0043426]; p53 binding [GO:0002039]; peptide N-acetyltransferase activity [GO:0034212]; peptide-lysine-N-acetyltransferase activity [GO:0…	7|9|8|7	31	7.75	4	0|3|0|0|0|0|0|0|4|0|0|0|0|0|1|1|1|0|0|0|0|0|0|0|0|0|0|0|0|0|0|1|0|0|0|0|0|0|0|0|0|0|0|0	0.99	1	0.99	1	0.99	4.59	31	0	Helka	18 / 716	1.1	2	18	TRUE	IntAct	pubmed:35140242|imex:IM-28767	intact-miscore:0.27
FOS	BioID	P01100	Q92922	Prey	P01100_Q92922	SMARCC1	SWI/SNF complex subunit SMARCC1 (BRG1-associated factor 155) (BAF155) (SWI/SNF complex 155 kDa subunit) (SWI/SNF-related matrix-associated actin-dependent regulator of chromatin subfamily C member 1)	SMARCC1 BAF155	1105	animal organ morphogenesis [GO:0009887]; chromatin remodeling [GO:0006338]; insulin receptor signaling pathway [GO:0008286]; negative regulation of cell differentiation [GO:0045596]; negative regulation of proteasomal ubiquitin-dependent protein catabolic process [GO:0032435]; nervous system development [GO:0007399]; nucleosome disassembly [GO:0006337]; positive regulation of cell differentiation…	brahma complex [GO:0035060]; chromatin [GO:0000785]; cytoplasm [GO:0005737]; GBAF complex [GO:0140288]; kinetochore [GO:0000776]; male germ cell nucleus [GO:0001673]; nBAF complex [GO:0071565]; npBAF complex [GO:0071564]; nuclear matrix [GO:0016363]; nucleoplasm [GO:0005654]; nucleus [GO:0005634]; protein-containing complex [GO:0032991]; RSC-type complex [GO:0016586]; SWI/SNF complex [GO:0016514]…	chromatin binding [GO:0003682]; histone binding [GO:0042393]; transcription coactivator activity [GO:0003713]	84|92|93|81	350	87.5	4	32|38|33|20|39|30|32|17|29|29|19|5|2|4|12|17|18|2|4|9|8|12|10|13|0|0|13|12|4|5|16|17|2|2|19|9|6|5|0|0|25|22|9|7	1	1	1	1	1	4.89	6.34	0	Helka	188 / 716	5.4	43	188	TRUE	IntAct	imex:IM-24178|pubmed:25609649|pubmed:35140242|imex:IM-28767	intact-miscore:0.48|intact-miscore:0.48
FOS	BioID	P01100	Q92925	Prey	P01100_Q92925	SMARCD2	SWI/SNF-related matrix-associated actin-dependent regulator of chromatin subfamily D member 2 (60 kDa BRG-1/Brm-associated factor subunit B) (BRG1-associated factor 60B) (BAF60B)	SMARCD2 BAF60B PRO2451	531	chromatin remodeling [GO:0006338]; nucleosome disassembly [GO:0006337]; positive regulation of cell differentiation [GO:0045597]; positive regulation of double-strand break repair [GO:2000781]; positive regulation of myoblast differentiation [GO:0045663]; positive regulation of T cell differentiation [GO:0045582]; regulation of G0 to G1 transition [GO:0070316]; regulation of G1/S transition of mi…	bBAF complex [GO:0140092]; brahma complex [GO:0035060]; chromatin [GO:0000785]; kinetochore [GO:0000776]; nuclear matrix [GO:0016363]; nucleoplasm [GO:0005654]; nucleus [GO:0005634]; protein-containing complex [GO:0032991]; RSC-type complex [GO:0016586]; SWI/SNF complex [GO:0016514]	transcription coactivator activity [GO:0003713]; transcription coregulator activity [GO:0003712]	18|17|20|19	74	18.5	4	8|8|7|6|5|5|6|0|4|6|2|1|1|2|2|2|1|0|1|2|1|1|1|1|1|0|5|9|2|2|4|6|0|1|3|0|2|2|0|0|8|8|4|3	0.99	0.99	0.99	0.99	0.99	3.74	6.12	0	Helka	65 / 716	1.8	8	65	TRUE	IntAct	pubmed:35140242|imex:IM-28767	intact-miscore:0.27
FOS	BioID	P01100	Q969G3	Prey	P01100_Q969G3	SMARCE1	SWI/SNF-related matrix-associated actin-dependent regulator of chromatin subfamily E member 1 (BRG1-associated factor 57) (BAF57)	SMARCE1 BAF57	411	chromatin remodeling [GO:0006338]; negative regulation of DNA-templated transcription [GO:0045892]; neurogenesis [GO:0022008]; nucleosome disassembly [GO:0006337]; positive regulation of cell differentiation [GO:0045597]; positive regulation of double-strand break repair [GO:2000781]; positive regulation of myoblast differentiation [GO:0045663]; positive regulation of stem cell population mainten…	bBAF complex [GO:0140092]; brahma complex [GO:0035060]; chromatin [GO:0000785]; kinetochore [GO:0000776]; nBAF complex [GO:0071565]; npBAF complex [GO:0071564]; nuclear chromosome [GO:0000228]; nuclear matrix [GO:0016363]; nucleoplasm [GO:0005654]; nucleus [GO:0005634]; protein-containing complex [GO:0032991]; RSC-type complex [GO:0016586]; SWI/SNF complex [GO:0016514]	chromatin binding [GO:0003682]; DNA binding [GO:0003677]; N-acetyltransferase activity [GO:0008080]; nuclear receptor binding [GO:0016922]; RNA binding [GO:0003723]; transcription coactivator activity [GO:0003713]	21|21|23|25	90	22.5	4	13|13|11|5|12|6|17|2|18|12|2|4|2|4|2|1|2|1|1|2|1|3|1|1|6|4|7|11|5|5|12|10|0|1|7|5|2|2|0|0|11|12|4|4	0.83	0.92	0.83	0.92	0.83	1.13	4.06	0.04	Helka	168 / 716	3.3	15	168	TRUE	IntAct	imex:IM-24178|pubmed:25609649|pubmed:35140242|imex:IM-28767	intact-miscore:0.48|intact-miscore:0.48
FOS	BioID	P01100	Q96G25	Prey	P01100_Q96G25	MED8	Mediator of RNA polymerase II transcription subunit 8 (Activator-recruited cofactor 32 kDa component) (ARC32) (Mediator complex subunit 8)	MED8	268	positive regulation of transcription elongation by RNA polymerase II [GO:0032968]; positive regulation of transcription initiation by RNA polymerase II [GO:0060261]; protein ubiquitination [GO:0016567]; regulation of transcription by RNA polymerase II [GO:0006357]; RNA polymerase II preinitiation complex assembly [GO:0051123]	core mediator complex [GO:0070847]; mediator complex [GO:0016592]; nucleoplasm [GO:0005654]; nucleus [GO:0005634]; ubiquitin ligase complex [GO:0000151]	RNA polymerase II cis-regulatory region sequence-specific DNA binding [GO:0000978]; transcription coregulator activity [GO:0003712]; ubiquitin protein ligase activity [GO:0061630]	2|2|2|3	9	2.25	4	1|2|0|0|0|0|0|0|0|0|0|1|0|0|0|0|0|0|0|0|0|0|0|0|0|0|0|0|0|0|1|1|0|0|0|0|0|0|0|0|0|0|0|0	0.92	0.98	0.92	0.98	0.92	2.22	16.5	0.02	Helka	9 / 716	1.2	2	9	TRUE	IntAct	pubmed:35140242|imex:IM-28767	intact-miscore:0.27
FOS	BioID	P01100	Q96GM5	Prey	P01100_Q96GM5	SMARCD1	SWI/SNF-related matrix-associated actin-dependent regulator of chromatin subfamily D member 1 (60 kDa BRG-1/Brm-associated factor subunit A) (BRG1-associated factor 60A) (BAF60A) (SWI/SNF complex 60 kDa subunit)	SMARCD1 BAF60A	515	cellular response to fatty acid [GO:0071398]; chromatin remodeling [GO:0006338]; negative regulation of cell differentiation [GO:0045596]; nervous system development [GO:0007399]; nucleosome disassembly [GO:0006337]; positive regulation of cell differentiation [GO:0045597]; positive regulation of cell population proliferation [GO:0008284]; positive regulation of double-strand break repair [GO:200…	brahma complex [GO:0035060]; chromatin [GO:0000785]; GBAF complex [GO:0140288]; intracellular membrane-bounded organelle [GO:0043231]; kinetochore [GO:0000776]; nBAF complex [GO:0071565]; npBAF complex [GO:0071564]; nuclear matrix [GO:0016363]; nucleoplasm [GO:0005654]; nucleus [GO:0005634]; RSC-type complex [GO:0016586]; SWI/SNF complex [GO:0016514]	chromatin binding [GO:0003682]; molecular adaptor activity [GO:0060090]; signaling receptor binding [GO:0005102]; transcription coactivator activity [GO:0003713]; transcription coregulator activity [GO:0003712]	24|24|32|28	108	27	4	9|13|10|6|13|8|9|3|10|5|0|0|0|0|2|0|2|0|0|2|0|1|0|0|0|0|5|7|3|3|9|10|1|2|3|5|0|2|0|0|10|9|3|3	0.98	0.99	0.98	0.99	0.98	3.34	7.07	0	Helka	60 / 716	2.3	8	60	TRUE	IntAct	pubmed:35140242|imex:IM-28767	intact-miscore:0.27
FOS	BioID	P01100	Q96L91	Prey	P01100_Q96L91	EP400	E1A-binding protein p400 (EC 3.6.4.-) (CAG repeat protein 32) (Domino homolog) (hDomino) (Trinucleotide repeat-containing gene 12 protein) (p400 kDa SWI2/SNF2-related protein)	EP400 CAGH32 KIAA1498 KIAA1818 TNRC12	3159	DNA repair [GO:0006281]; positive regulation of DNA-templated transcription [GO:0045893]; positive regulation of double-strand break repair via homologous recombination [GO:1905168]; regulation of apoptotic process [GO:0042981]; regulation of cell cycle [GO:0051726]; regulation of double-strand break repair [GO:2000779]	NuA4 histone acetyltransferase complex [GO:0035267]; nuclear speck [GO:0016607]; nucleoplasm [GO:0005654]; nucleosome [GO:0000786]; Swr1 complex [GO:0000812]	ATP binding [GO:0005524]; ATP-dependent chromatin remodeler activity [GO:0140658]; chromatin binding [GO:0003682]; DNA binding [GO:0003677]; helicase activity [GO:0004386]; hydrolase activity [GO:0016787]; protein antigen binding [GO:1990405]	15|10|16|14	55	13.75	4	1|5|7|5|7|4|4|1|2|3|4|2|1|1|2|2|2|0|2|2|2|2|1|2|0|0|7|15|1|0|1|9|0|0|1|1|0|1|0|0|13|10|3|1	0.79	0.9	0.79	0.9	0.79	0.2	4.76	0.05	Helka	89 / 716	7.3	58	89	TRUE	IntAct	pubmed:20195357|imex:IM-20475|pubmed:35140242|imex:IM-28767	author score:class2|intact-miscore:0.54|intact-miscore:0.54
FOS	BioID	P01100	Q96RK0	Prey	P01100_Q96RK0	CIC	Protein capicua homolog	CIC KIAA0306	1608	brain development [GO:0007420]; learning [GO:0007612]; memory [GO:0007613]; negative regulation of DNA-templated transcription [GO:0045892]; regulation of transcription by RNA polymerase II [GO:0006357]; social behavior [GO:0035176]	chromatin [GO:0000785]; intracellular membrane-bounded organelle [GO:0043231]; nucleoplasm [GO:0005654]; nucleus [GO:0005634]	DNA-binding transcription factor activity, RNA polymerase II-specific [GO:0000981]; RNA polymerase II transcription regulatory region sequence-specific DNA binding [GO:0000977]	15|16|19|19	69	17.25	4	13|9|7|5|9|4|13|3|10|7|1|0|0|0|2|1|0|1|0|0|0|0|0|1|0|2|13|15|2|1|5|5|0|0|3|2|0|2|0|0|8|3|1|0	0.86	0.9	0.86	0.9	0.86	1.41	5.13	0.03	Helka	101 / 716	9.2	38	101	TRUE	IntAct	pubmed:35140242|imex:IM-28767	intact-miscore:0.27
FOS	BioID	P01100	Q99856	Prey	P01100_Q99856	ARID3A	AT-rich interactive domain-containing protein 3A (ARID domain-containing protein 3A) (B-cell regulator of IgH transcription) (Bright) (Dead ringer-like protein 1) (E2F-binding protein 1)	ARID3A DRIL1 DRIL3 DRX E2FBP1	593	positive regulation of transcription by RNA polymerase II [GO:0045944]; regulation of transcription by RNA polymerase II [GO:0006357]	cytosol [GO:0005829]; membrane raft [GO:0045121]; nucleoplasm [GO:0005654]; nucleus [GO:0005634]	chromatin binding [GO:0003682]; DNA binding [GO:0003677]; identical protein binding [GO:0042802]; transcription coregulator activity [GO:0003712]	20|23|23|20	86	21.5	4	12|11|6|6|13|11|6|5|7|6|1|1|0|0|1|0|1|0|1|1|1|1|1|2|2|1|6|5|2|1|6|4|0|0|1|2|0|0|0|0|10|5|2|0	0.96	0.97	0.96	0.97	0.96	2.91	6.71	0.01	Helka	72 / 716	3.7	17	72	TRUE	IntAct	pubmed:35140242|imex:IM-28767	intact-miscore:0.27
FOS	BioID	P01100	Q9BTK6	Prey	P01100_Q9BTK6	PAGR1	PAXIP1-associated glutamate-rich protein 1 (Glutamate-rich coactivator interacting with SRC1) (GAS) (PAXIP1-associated protein 1) (PTIP-associated protein 1)	PAGR1 C16orf53 PA1	254	DNA recombination [GO:0006310]; DNA repair [GO:0006281]; positive regulation of cell cycle G1/S phase transition [GO:1902808]; positive regulation of intracellular estrogen receptor signaling pathway [GO:0033148]; positive regulation of transcription by RNA polymerase II [GO:0045944]	histone methyltransferase complex [GO:0035097]; MLL3/4 complex [GO:0044666]; nucleoplasm [GO:0005654]; nucleus [GO:0005634]	nuclear estrogen receptor binding [GO:0030331]	4|3|4|2	13	3.25	4	0|0|0|0|0|0|0|0|0|0|0|0|0|0|0|0|0|0|0|0|0|0|0|0|0|0|0|0|0|0|0|0|0|0|0|0|0|0|0|0|0|0|0|0	0.98	1	0.98	1	0.98	2.76	32.5	0	Helka	/ 716	0		0	TRUE	IntAct	pubmed:35140242|imex:IM-28767	intact-miscore:0.27
FOS	BioID	P01100	Q9NPA3	Prey	P01100_Q9NPA3	MID1IP1	Mid1-interacting protein 1 (Gastrulation-specific G12-like protein) (Mid1-interacting G12-like protein) (Protein STRAIT11499) (Spot 14-related protein) (S14R) (Spot 14-R)	MID1IP1 MIG12	183	lipid metabolic process [GO:0006629]; negative regulation of microtubule depolymerization [GO:0007026]; positive regulation of fatty acid biosynthetic process [GO:0045723]; positive regulation of ligase activity [GO:0051351]; protein polymerization [GO:0051258]; regulation of lipid biosynthetic process [GO:0046890]	cytosol [GO:0005829]; microtubule [GO:0005874]; microtubule cytoskeleton [GO:0015630]; nucleus [GO:0005634]	identical protein binding [GO:0042802]	3|3|5|6	17	4.25	4	0|0|0|0|0|2|0|0|0|0|0|0|0|0|1|0|0|0|1|2|0|0|0|0|0|0|0|0|0|0|0|0|0|0|1|0|0|0|3|4|1|0|1|2	0.85	0.97	0.85	0.97	0.85	1.06	10.39	0.04	Helka	1 / 716	1	1	1	TRUE	IntAct	pubmed:35140242|imex:IM-28767	intact-miscore:0.27
FOS	BioID	P01100	Q9NPI1	Prey	P01100_Q9NPI1	BRD7	Bromodomain-containing protein 7 (75 kDa bromodomain protein) (Protein CELTIX-1)	BRD7 BP75 CELTIX1	651	cell cycle [GO:0007049]; chromatin remodeling [GO:0006338]; negative regulation of DNA-templated transcription [GO:0045892]; negative regulation of G1/S transition of mitotic cell cycle [GO:2000134]; positive regulation of cell differentiation [GO:0045597]; positive regulation of double-strand break repair [GO:2000781]; positive regulation of myoblast differentiation [GO:0045663]; positive regula…	chromatin [GO:0000785]; cytoplasm [GO:0005737]; cytosol [GO:0005829]; kinetochore [GO:0000776]; nuclear matrix [GO:0016363]; nucleoplasm [GO:0005654]; nucleus [GO:0005634]; RSC-type complex [GO:0016586]	histone binding [GO:0042393]; lysine-acetylated histone binding [GO:0070577]; p53 binding [GO:0002039]; transcription cis-regulatory region binding [GO:0000976]; transcription coactivator activity [GO:0003713]; transcription corepressor activity [GO:0003714]	6|8|6|8	28	7	4	0|0|1|1|1|0|1|0|0|0|0|0|0|0|0|0|0|0|0|0|0|0|0|0|0|0|0|1|0|0|0|3|0|0|0|1|0|0|0|0|1|2|0|2	1	1	1	1	1	5.45	22	0	Helka	30 / 716	2.7	8	30	TRUE	IntAct	pubmed:35140242|imex:IM-28767	intact-miscore:0.27
FOS	BioID	P01100	Q9NQX4	Prey	P01100_Q9NQX4	MYO5C	Unconventional myosin-Vc	MYO5C	1742	actin filament organization [GO:0007015]; vesicle transport along actin filament [GO:0030050]	actin cytoskeleton [GO:0015629]; cytoplasm [GO:0005737]; extracellular exosome [GO:0070062]; myosin complex [GO:0016459]; vesicle [GO:0031982]	actin filament binding [GO:0051015]; ATP binding [GO:0005524]; calmodulin binding [GO:0005516]; microfilament motor activity [GO:0000146]	7|3|3|3	16	4	4	0|0|0|0|0|0|0|0|0|0|0|0|0|0|0|0|1|0|0|0|0|0|0|0|0|0|0|0|0|0|0|0|0|0|0|0|0|0|0|0|0|0|0|0	0.99	1	0.99	1	0.99	4.6	40	0	Helka	36 / 716	5.2	37	36	TRUE	IntAct	pubmed:35140242|imex:IM-28767	intact-miscore:0.27
FOS	BioID	P01100	Q9NYL9	Prey	P01100_Q9NYL9	TMOD3	Tropomodulin-3 (Ubiquitous tropomodulin) (U-Tmod)	TMOD3	352	actin filament organization [GO:0007015]; erythrocyte development [GO:0048821]; mitotic cell cycle phase transition [GO:0044772]; muscle contraction [GO:0006936]; myofibril assembly [GO:0030239]; pointed-end actin filament capping [GO:0051694]; positive regulation of mitotic cell cycle phase transition [GO:1901992]	adherens junction [GO:0005912]; cytoskeleton [GO:0005856]; myofibril [GO:0030016]; striated muscle thin filament [GO:0005865]	actin binding [GO:0003779]; cadherin binding involved in cell-cell adhesion [GO:0098641]; tropomyosin binding [GO:0005523]	17|21|14|20	72	18	4	0|0|0|0|0|0|0|0|0|0|2|1|1|3|2|2|5|0|1|1|0|0|0|0|0|0|0|0|1|1|0|0|1|2|1|1|1|0|9|6|0|0|0|2	1	1	1	1	1	4.44	18.42	0	Helka	169 / 716	7.9	106	169	TRUE	IntAct	pubmed:35140242|imex:IM-28767	intact-miscore:0.27
FOS	BioID	P01100	Q9NZR1	Prey	P01100_Q9NZR1	TMOD2	Tropomodulin-2 (Neuronal tropomodulin) (N-Tmod)	TMOD2 NTMOD	351	actin filament organization [GO:0007015]; learning or memory [GO:0007611]; muscle contraction [GO:0006936]; myofibril assembly [GO:0030239]; nervous system development [GO:0007399]; neuron-neuron synaptic transmission [GO:0007270]; pointed-end actin filament capping [GO:0051694]; positive regulation of G protein-coupled receptor signaling pathway [GO:0045745]	cytoskeleton [GO:0005856]; myofibril [GO:0030016]; striated muscle thin filament [GO:0005865]; synapse [GO:0045202]	actin binding [GO:0003779]; tropomyosin binding [GO:0005523]	4|2|2|3	11	2.75	4	0|0|0|0|0|0|0|0|0|0|0|0|0|0|0|0|0|0|0|0|0|0|0|0|0|0|0|0|0|0|0|0|0|0|0|0|0|0|0|0|0|0|0|0	0.97	1	0.97	1	0.97	2.76	27.5	0.01	Helka	51 / 716	6.8	55	51	TRUE	IntAct	pubmed:35140242|imex:IM-28767	intact-miscore:0.27
FOS	BioID	P01100	Q9P0K7	Prey	P01100_Q9P0K7	RAI14	Ankycorbin (Ankyrin repeat and coiled-coil structure-containing protein) (Novel retinal pigment epithelial cell protein) (Retinoic acid-induced protein 14)	RAI14 KIAA1334 NORPEG	980	cell differentiation [GO:0030154]; spermatogenesis [GO:0007283]	anchoring junction [GO:0070161]; cell cortex [GO:0005938]; cytoskeleton [GO:0005856]; cytosol [GO:0005829]; fibrillar center [GO:0001650]; nucleoplasm [GO:0005654]	actin binding [GO:0003779]	21|18|15|14	68	17	4	0|0|0|0|0|0|0|0|0|0|6|4|6|5|8|11|6|1|0|0|0|0|0|0|1|1|0|0|3|2|0|0|4|4|1|1|16|16|3|4|0|0|1|3	0.91	0.96	0.91	0.96	0.91	1.8	6.99	0.02	Helka	121 / 716	18.6	100	121	TRUE	IntAct	pubmed:35140242|imex:IM-28767	intact-miscore:0.27
FOS	BioID	P01100	Q9UBL3	Prey	P01100_Q9UBL3	ASH2L	Set1/Ash2 histone methyltransferase complex subunit ASH2 (ASH2-like protein)	ASH2L ASH2L1	628	DNA damage response [GO:0006974]; hemopoiesis [GO:0030097]; positive regulation of cell population proliferation [GO:0008284]; positive regulation of transcription by RNA polymerase II [GO:0045944]; response to estrogen [GO:0043627]; transcription initiation-coupled chromatin remodeling [GO:0045815]	euchromatin [GO:0000791]; histone methyltransferase complex [GO:0035097]; MLL1 complex [GO:0071339]; MLL1/2 complex [GO:0044665]; MLL3/4 complex [GO:0044666]; nucleoplasm [GO:0005654]; nucleus [GO:0005634]; Set1C/COMPASS complex [GO:0048188]	beta-catenin binding [GO:0008013]; metal ion binding [GO:0046872]; transcription cis-regulatory region binding [GO:0000976]	17|16|17|17	67	16.75	4	11|12|14|5|10|5|13|4|13|8|6|3|4|2|6|0|8|0|2|3|4|3|0|0|0|2|3|3|2|0|5|6|0|2|1|1|2|4|0|0|9|9|3|3	0.76	0.79	0.76	0.79	0.76	0.85	3.86	0.06	Helka	43 / 716	1.8	5	43	TRUE	IntAct	pubmed:35140242|imex:IM-28767	intact-miscore:0.27
FOS	BioID	P01100	Q9UHB6	Prey	P01100_Q9UHB6	LIMA1	LIM domain and actin-binding protein 1 (Epithelial protein lost in neoplasm)	LIMA1 EPLIN SREBP3 PP624	759	actin filament bundle assembly [GO:0051017]; cell migration [GO:0016477]; cholesterol homeostasis [GO:0042632]; cholesterol metabolic process [GO:0008203]; intestinal cholesterol absorption [GO:0030299]; negative regulation of actin filament depolymerization [GO:0030835]; ruffle organization [GO:0031529]	actin cytoskeleton [GO:0015629]; brush border membrane [GO:0031526]; cleavage furrow [GO:0032154]; cytosol [GO:0005829]; focal adhesion [GO:0005925]; plasma membrane [GO:0005886]; ruffle [GO:0001726]; stress fiber [GO:0001725]	actin filament binding [GO:0051015]; actin monomer binding [GO:0003785]; cadherin binding [GO:0045296]; metal ion binding [GO:0046872]	39|47|35|33	154	38.5	4	0|1|1|0|1|0|0|0|0|0|3|2|4|3|12|8|9|0|2|2|1|1|1|1|0|0|0|0|7|5|0|1|3|6|3|4|3|5|5|4|0|0|0|1	1	1	1	1	1	7.92	17.11	0	Helka	218 / 716	16.1	117	218	TRUE	IntAct	pubmed:35140242|imex:IM-28767	intact-miscore:0.27
FOS	BioID	P01100	Q9UM54	Prey	P01100_Q9UM54	MYO6	Unconventional myosin-VI (Unconventional myosin-6)	MYO6 KIAA0389	1294	actin filament organization [GO:0007015]; actin filament-based movement [GO:0030048]; DNA damage response, signal transduction by p53 class mediator [GO:0030330]; endocytosis [GO:0006897]; inner ear auditory receptor cell differentiation [GO:0042491]; inner ear morphogenesis [GO:0042472]; intracellular protein transport [GO:0006886]; regulation of secretion [GO:0051046]; response to xenobiotic st…	actin cytoskeleton [GO:0015629]; actin filament [GO:0005884]; apical part of cell [GO:0045177]; autophagosome [GO:0005776]; cell cortex [GO:0005938]; clathrin-coated pit [GO:0005905]; clathrin-coated vesicle membrane [GO:0030665]; cytoplasm [GO:0005737]; cytoplasmic vesicle [GO:0031410]; cytosol [GO:0005829]; endocytic vesicle [GO:0030139]; endosome [GO:0005768]; extracellular exosome [GO:0070062…	actin binding [GO:0003779]; actin filament binding [GO:0051015]; ADP binding [GO:0043531]; ATP binding [GO:0005524]; calmodulin binding [GO:0005516]; cytoskeletal motor activity [GO:0003774]; identical protein binding [GO:0042802]; microfilament motor activity [GO:0000146]; minus-end directed microfilament motor activity [GO:0060001]	57|48|48|43	196	49	4	0|0|0|0|0|0|0|0|0|0|3|3|6|6|9|13|10|1|1|1|0|1|0|0|3|4|1|0|4|0|0|0|2|1|0|0|4|1|2|2|0|0|4|2	1	1	1	1	1	8.77	25.67	0	Helka	148 / 716	17.2	215	148	TRUE	IntAct	pubmed:35140242|imex:IM-28767	intact-miscore:0.27
FOS	BioID	P01100	Q9UPN9	Prey	P01100_Q9UPN9	TRIM33	E3 ubiquitin-protein ligase TRIM33 (EC 2.3.2.27) (Ectodermin homolog) (RET-fused gene 7 protein) (Protein Rfg7) (RING-type E3 ubiquitin transferase TRIM33) (Transcription intermediary factor 1-gamma) (TIF1-gamma) (Tripartite motif-containing protein 33)	TRIM33 KIAA1113 RFG7 TIF1G	1127	negative regulation of BMP signaling pathway [GO:0030514]; negative regulation of DNA-templated transcription [GO:0045892]; negative regulation of transcription by RNA polymerase II [GO:0000122]; protein ubiquitination [GO:0016567]; regulation of transforming growth factor beta receptor signaling pathway [GO:0017015]	nucleoplasm [GO:0005654]; nucleus [GO:0005634]	co-SMAD binding [GO:0070410]; DNA binding [GO:0003677]; R-SMAD binding [GO:0070412]; ubiquitin-protein transferase activity [GO:0004842]; zinc ion binding [GO:0008270]	10|8|14|14	46	11.5	4	2|5|5|2|5|3|1|0|4|2|0|0|0|0|0|0|0|0|0|0|0|0|0|0|0|0|4|0|0|0|1|2|0|0|0|0|0|0|0|0|0|0|1|2	0.97	0.99	0.97	0.99	0.97	2.6	12.97	0.01	Helka	69 / 716	2.2	6	69	TRUE	IntAct	pubmed:35140242|imex:IM-28767	intact-miscore:0.27
FOS	BioID	P01100	Q9Y4I1	Prey	P01100_Q9Y4I1	MYO5A	Unconventional myosin-Va (Dilute myosin heavy chain, non-muscle) (Myosin heavy chain 12) (Myosin-12) (Myoxin)	MYO5A MYH12	1855	actin filament organization [GO:0007015]; actin filament-based movement [GO:0030048]; cellular response to insulin stimulus [GO:0032869]; melanosome transport [GO:0032402]; post-Golgi vesicle-mediated transport [GO:0006892]; protein localization to plasma membrane [GO:0072659]; protein transport [GO:0015031]; vesicle transport along actin filament [GO:0030050]; vesicle-mediated transport [GO:0016…	actin cytoskeleton [GO:0015629]; cytoplasm [GO:0005737]; cytosol [GO:0005829]; extracellular exosome [GO:0070062]; filopodium tip [GO:0032433]; growth cone [GO:0030426]; insulin-responsive compartment [GO:0032593]; melanosome [GO:0042470]; membrane [GO:0016020]; myosin complex [GO:0016459]; neuron projection [GO:0043005]; ruffle [GO:0001726]	actin filament binding [GO:0051015]; ATP binding [GO:0005524]; calmodulin binding [GO:0005516]; microfilament motor activity [GO:0000146]; RNA binding [GO:0003723]; small GTPase binding [GO:0031267]	33|27|17|19	96	24	4	0|0|0|0|1|0|0|0|0|0|0|0|0|0|0|0|0|0|0|0|0|0|0|0|0|0|0|0|0|0|0|0|0|0|0|0|0|0|0|0|0|0|0|0	1	1	1	1	1	26.52	240	0	Helka	52 / 716	12.1	112	52	TRUE	IntAct	pubmed:35140242|imex:IM-28767	intact-miscore:0.27
MYC	BioID	P01106	O15047	Prey	P01106_O15047	SETD1A	Histone-lysine N-methyltransferase SETD1A (EC 2.1.1.364) (Lysine N-methyltransferase 2F) (SET domain-containing protein 1A) (hSET1A) (Set1/Ash2 histone methyltransferase complex subunit SET1)	SETD1A KIAA0339 KMT2F SET1 SET1A	1707	brain development [GO:0007420]; DNA damage response [GO:0006974]; methylation [GO:0032259]; regulation of chromatin organization [GO:1902275]; regulation of hematopoietic stem cell differentiation [GO:1902036]	chromatin [GO:0000785]; histone methyltransferase complex [GO:0035097]; nuclear speck [GO:0016607]; nucleoplasm [GO:0005654]; nucleus [GO:0005634]; Set1C/COMPASS complex [GO:0048188]	beta-catenin binding [GO:0008013]; histone H3K4 methyltransferase activity [GO:0042800]; histone H3K4 monomethyltransferase activity [GO:0140945]; histone H3K4 trimethyltransferase activity [GO:0140999]; RNA binding [GO:0003723]; RNA polymerase II-specific DNA-binding transcription factor binding [GO:0061629]	39|37|38|45	159	39.75	4	11|11|9|4|7|5|4|3|7|3|2|1|1|1|0|0|0|0|0|1|1|1|0|0|1|0|7|3|2|0|7|5|0|0|0|1|0|1|0|0|4|4|1|0	1	1	1	1	1	7.95	16.19	0	Helka	37 / 716	2	8	37	TRUE	IntAct	pubmed:35140242|imex:IM-28767	intact-miscore:0.27
MYC	BioID	P01106	O15090	Prey	P01106_O15090	ZNF536	Zinc finger protein 536	ZNF536 KIAA0390	1300	negative regulation of neuron differentiation [GO:0045665]; negative regulation of retinoic acid receptor signaling pathway [GO:0048387]; negative regulation of transcription by RNA polymerase II [GO:0000122]; regulation of DNA-templated transcription [GO:0006355]	nucleus [GO:0005634]	DNA-binding transcription factor activity, RNA polymerase II-specific [GO:0000981]; DNA-binding transcription repressor activity, RNA polymerase II-specific [GO:0001227]; metal ion binding [GO:0046872]; retinoic acid-responsive element binding [GO:0044323]; RNA polymerase II cis-regulatory region sequence-specific DNA binding [GO:0000978]	3|3|3|3	12	3	4	0|0|0|0|0|0|0|0|0|0|0|0|0|0|0|0|0|0|0|0|0|0|0|0|0|0|0|0|0|0|0|0|0|0|0|0|0|0|0|0|0|0|0|0	0.99	0.99	0.99	0.99	0.99	4.6	30	0	Helka	37 / 716	1.6	8	37	TRUE	IntAct	pubmed:35140242|imex:IM-28767	intact-miscore:0.27
MYC	BioID	P01106	O15164	Prey	P01106_O15164	TRIM24	Transcription intermediary factor 1-alpha (TIF1-alpha) (EC 2.3.2.27) (E3 ubiquitin-protein ligase TRIM24) (RING finger protein 82) (RING-type E3 ubiquitin transferase TIF1-alpha) (Tripartite motif-containing protein 24)	TRIM24 RNF82 TIF1 TIF1A	1050	calcium ion homeostasis [GO:0055074]; cellular response to estrogen stimulus [GO:0071391]; epithelial cell proliferation [GO:0050673]; negative regulation of DNA-templated transcription [GO:0045892]; negative regulation of epithelial cell proliferation [GO:0050680]; positive regulation of gene expression [GO:0010628]; protein catabolic process [GO:0030163]; protein ubiquitination [GO:0016567]; re…	cytosol [GO:0005829]; euchromatin [GO:0000791]; male germ cell nucleus [GO:0001673]; mitochondrion [GO:0005739]; nucleoplasm [GO:0005654]; nucleus [GO:0005634]; perichromatin fibrils [GO:0005726]	chromatin binding [GO:0003682]; estrogen response element binding [GO:0034056]; lysine-acetylated histone binding [GO:0070577]; nuclear receptor binding [GO:0016922]; p53 binding [GO:0002039]; protein kinase activity [GO:0004672]; signaling receptor binding [GO:0005102]; transcription coactivator activity [GO:0003713]; ubiquitin protein ligase activity [GO:0061630]; zinc ion binding [GO:0008270]	17|15|15|15	62	15.5	4	4|1|1|0|1|0|1|1|3|0|0|0|0|0|0|0|0|0|0|0|0|0|0|0|0|0|0|0|0|0|2|2|0|0|0|0|0|0|0|0|0|0|0|0	1	1	1	1	1	9.45	42.62	0	Helka	59 / 716	2.2	8	59	TRUE	IntAct	pubmed:35140242|imex:IM-28767	intact-miscore:0.27
MYC	BioID	P01106	O15265	Prey	P01106_O15265	ATXN7	Ataxin-7 (Spinocerebellar ataxia type 7 protein)	ATXN7 SCA7	892	microtubule cytoskeleton organization [GO:0000226]; negative regulation of microtubule depolymerization [GO:0007026]; nucleus organization [GO:0006997]; positive regulation of DNA-templated transcription [GO:0045893]; regulation of DNA repair [GO:0006282]; regulation of RNA splicing [GO:0043484]; regulation of transcription by RNA polymerase II [GO:0006357]; visual perception [GO:0007601]	cytosol [GO:0005829]; microtubule cytoskeleton [GO:0015630]; nuclear matrix [GO:0016363]; nucleolus [GO:0005730]; nucleoplasm [GO:0005654]; nucleus [GO:0005634]; SAGA complex [GO:0000124]; transcription factor TFTC complex [GO:0033276]		27|29|25|29	110	27.5	4	0|0|0|0|0|0|0|0|0|0|0|0|0|0|0|0|0|0|0|0|0|0|0|0|0|0|0|0|0|0|0|0|0|0|0|0|0|0|0|0|0|0|0|0	1	1	1	1	1	38.29	275	0	Helka	1 / 716	1	1	1	TRUE	IntAct	pubmed:35140242|imex:IM-28767	intact-miscore:0.27
MYC	BioID	P01106	O15294	Prey	P01106_O15294	OGT	UDP-N-acetylglucosamine--peptide N-acetylglucosaminyltransferase 110 kDa subunit (EC 2.4.1.255) (O-GlcNAc transferase subunit p110) (O-linked N-acetylglucosamine transferase 110 kDa subunit) (OGT)	OGT	1046	apoptotic process [GO:0006915]; chromatin organization [GO:0006325]; circadian regulation of gene expression [GO:0032922]; hemopoiesis [GO:0030097]; mitophagy [GO:0000423]; negative regulation of cell migration [GO:0030336]; negative regulation of proteasomal ubiquitin-dependent protein catabolic process [GO:0032435]; negative regulation of protein ubiquitination [GO:0031397]; negative regulation…	cell projection [GO:0042995]; cytosol [GO:0005829]; glutamatergic synapse [GO:0098978]; histone acetyltransferase complex [GO:0000123]; mitochondrial membrane [GO:0031966]; NSL complex [GO:0044545]; nucleoplasm [GO:0005654]; nucleus [GO:0005634]; plasma membrane [GO:0005886]; protein N-acetylglucosaminyltransferase complex [GO:0017122]; protein-containing complex [GO:0032991]; Sin3 complex [GO:00…	acetylglucosaminyltransferase activity [GO:0008375]; chromatin DNA binding [GO:0031490]; phosphatidylinositol-3,4,5-trisphosphate binding [GO:0005547]; protein O-acetylglucosaminyltransferase activity [GO:0097363]	79|78|71|71	299	74.75	4	41|38|32|17|38|27|34|16|42|33|34|14|18|14|24|27|24|5|14|17|9|21|5|5|7|5|4|3|4|4|12|8|2|3|6|4|10|10|1|2|15|16|9|12	0.98	0.99	0.98	0.99	0.98	3.34	4.79	0.01	Helka	162 / 716	4.3	24	162	TRUE	IntAct	pubmed:35140242|imex:IM-28767	intact-miscore:0.27
MYC	BioID	P01106	O75461	Prey	P01106_O75461	E2F6	Transcription factor E2F6 (E2F-6)	E2F6	281	negative regulation of transcription by RNA polymerase II [GO:0000122]; regulation of transcription by RNA polymerase II [GO:0006357]; regulation of transcription involved in G1/S transition of mitotic cell cycle [GO:0000083]	chromatin [GO:0000785]; MLL1 complex [GO:0071339]; nucleoplasm [GO:0005654]; nucleus [GO:0005634]; RNA polymerase II transcription regulator complex [GO:0090575]	DNA-binding transcription factor activity, RNA polymerase II-specific [GO:0000981]; DNA-binding transcription repressor activity, RNA polymerase II-specific [GO:0001227]; protein dimerization activity [GO:0046983]; RNA polymerase II cis-regulatory region sequence-specific DNA binding [GO:0000978]	5|3|2|2	12	3	4	0|1|0|1|0|0|1|0|1|1|0|0|0|0|0|0|0|0|0|0|0|0|0|0|0|0|2|1|0|0|0|2|0|0|0|0|0|0|0|0|0|1|0|0	0.85	1	0.85	1	0.85	1	12	0.04	Helka	42 / 716	1.6	4	42	TRUE	IntAct	pubmed:35140242|imex:IM-28767	intact-miscore:0.27
MYC	BioID	P01106	O75478	Prey	P01106_O75478	TADA2A	Transcriptional adapter 2-alpha (Transcriptional adapter 2-like) (ADA2-like protein)	TADA2A TADA2L KL04P	443	chromatin remodeling [GO:0006338]; regulation of cell cycle [GO:0051726]; regulation of cell division [GO:0051302]; regulation of DNA-templated transcription [GO:0006355]; regulation of embryonic development [GO:0045995]; regulation of histone acetylation [GO:0035065]; regulation of transcription by RNA polymerase II [GO:0006357]; regulation of tubulin deacetylation [GO:0090043]	ATAC complex [GO:0140672]; mitotic spindle [GO:0072686]; nucleoplasm [GO:0005654]; nucleus [GO:0005634]; SAGA complex [GO:0000124]; SAGA-type complex [GO:0070461]	chromatin binding [GO:0003682]; DNA binding [GO:0003677]; transcription coactivator activity [GO:0003713]; zinc ion binding [GO:0008270]	14|13|12|14	53	13.25	4	2|1|4|4|7|3|2|0|3|3|1|1|1|0|0|0|0|0|0|1|0|1|0|0|0|0|2|2|1|0|0|2|0|0|0|0|0|0|0|0|6|3|1|1	0.99	0.99	0.99	0.99	0.99	4.26	11.21	0	Helka	1 / 716	1	1	1	TRUE	IntAct	pubmed:35140242|imex:IM-28767	intact-miscore:0.27
MYC	BioID	P01106	O75486	Prey	P01106_O75486	SUPT3H	Transcription initiation protein SPT3 homolog (SPT3-like protein)	SUPT3H SPT3	317	positive regulation of DNA-templated transcription [GO:0045893]; regulation of DNA repair [GO:0006282]; regulation of DNA-templated transcription [GO:0006355]; regulation of RNA splicing [GO:0043484]; regulation of transcription by RNA polymerase II [GO:0006357]; transcription by RNA polymerase II [GO:0006366]	nucleoplasm [GO:0005654]; nucleus [GO:0005634]; SAGA complex [GO:0000124]; transcription factor TFTC complex [GO:0033276]	protein heterodimerization activity [GO:0046982]; transcription coactivator activity [GO:0003713]	11|12|12|12	47	11.75	4	3|4|3|1|3|1|2|2|0|2|0|0|0|0|0|0|0|0|0|0|0|0|0|0|0|0|0|1|0|0|0|1|0|0|0|0|0|0|0|0|0|0|0|0	1	1	1	1	1	6.17	22.48	0	Helka	19 / 716	2.5	6	19	TRUE	IntAct	pubmed:35140242|imex:IM-28767	intact-miscore:0.27
MYC	BioID	P01106	O75528	Prey	P01106_O75528	TADA3	Transcriptional adapter 3 (ADA3 homolog) (hADA3) (STAF54) (Transcriptional adapter 3-like) (ADA3-like protein)	TADA3 ADA3 TADA3L	432	chromatin organization [GO:0006325]; intracellular estrogen receptor signaling pathway [GO:0030520]; mitotic cell cycle [GO:0000278]; negative regulation of transcription by RNA polymerase II [GO:0000122]; positive regulation of DNA-templated transcription [GO:0045893]; positive regulation of gene expression [GO:0010628]; regulation of cell cycle [GO:0051726]; regulation of cell division [GO:0051…	ATAC complex [GO:0140672]; mitotic spindle [GO:0072686]; nucleoplasm [GO:0005654]; nucleus [GO:0005634]; SAGA complex [GO:0000124]; transcription factor TFTC complex [GO:0033276]	nuclear receptor binding [GO:0016922]; nuclear receptor coactivator activity [GO:0030374]; protein domain specific binding [GO:0019904]; transcription coactivator activity [GO:0003713]	31|31|30|26	118	29.5	4	5|7|9|6|9|6|5|5|6|7|2|1|1|1|1|1|4|0|0|0|1|0|0|0|0|1|4|4|1|1|6|4|0|0|3|0|2|0|0|0|6|5|2|2	1	1	1	1	1	6.89	11	0	Helka	25 / 716	1.5	4	25	TRUE	IntAct	pubmed:35140242|imex:IM-28767	intact-miscore:0.27
MYC	BioID	P01106	O75529	Prey	P01106_O75529	TAF5L	TAF5-like RNA polymerase II p300/CBP-associated factor-associated factor 65 kDa subunit 5L (TAF5L) (PCAF-associated factor 65 beta) (PAF65-beta)	TAF5L PAF65B	589	positive regulation of DNA-templated transcription [GO:0045893]; regulation of DNA repair [GO:0006282]; regulation of DNA-templated transcription [GO:0006355]; regulation of RNA splicing [GO:0043484]; regulation of somatic stem cell population maintenance [GO:1904672]; regulation of transcription by RNA polymerase II [GO:0006357]; transcription by RNA polymerase II [GO:0006366]	cytoplasmic ribonucleoprotein granule [GO:0036464]; histone acetyltransferase complex [GO:0000123]; nuclear speck [GO:0016607]; nucleus [GO:0005634]; SAGA complex [GO:0000124]; transcription factor TFTC complex [GO:0033276]	transcription coactivator activity [GO:0003713]	31|34|33|34	132	33	4	2|1|0|1|3|1|2|1|0|0|0|0|0|0|0|0|0|0|0|0|0|0|0|0|0|0|2|2|0|0|1|0|0|0|0|0|0|0|0|0|0|0|0|0	1	1	1	1	1	27.5	90.75	0	Helka	16 / 716	1.5	3	16	TRUE	IntAct	pubmed:35140242|imex:IM-28767	intact-miscore:0.27
MYC	BioID	P01106	O94864	Prey	P01106_O94864	SUPT7L	STAGA complex 65 subunit gamma (Adenocarcinoma antigen ART1) (SPTF-associated factor 65 gamma) (STAF65gamma) (Suppressor of Ty 7-like)	SUPT7L KIAA0764	414	maintenance of protein location in nucleus [GO:0051457]; positive regulation of DNA-templated transcription [GO:0045893]; regulation of DNA repair [GO:0006282]; regulation of RNA splicing [GO:0043484]	nucleoplasm [GO:0005654]; nucleus [GO:0005634]; SAGA complex [GO:0000124]	protein heterodimerization activity [GO:0046982]; transcription coactivator activity [GO:0003713]	18|16|13|11	58	14.5	4	1|3|1|1|2|0|1|1|1|0|0|0|0|0|0|0|0|0|0|0|0|0|0|0|0|0|3|2|0|0|3|1|0|0|0|0|0|0|0|0|2|1|0|0	1	1	1	1	1	8.54	27.74	0	Helka	24 / 716	1.9	5	24	TRUE	IntAct	pubmed:35140242|imex:IM-28767	intact-miscore:0.27
MYC	BioID	P01106	O95619	Prey	P01106_O95619	YEATS4	YEATS domain-containing protein 4 (Glioma-amplified sequence 41) (Gas41) (NuMA-binding protein 1) (NuBI-1) (NuBI1)	YEATS4 GAS41	227	chromatin remodeling [GO:0006338]; mitotic cell cycle [GO:0000278]; positive regulation of DNA-templated transcription [GO:0045893]; positive regulation of double-strand break repair via homologous recombination [GO:1905168]; regulation of apoptotic process [GO:0042981]; regulation of cell cycle [GO:0051726]; regulation of DNA-templated transcription [GO:0006355]; regulation of double-strand brea…	NuA4 histone acetyltransferase complex [GO:0035267]; nuclear matrix [GO:0016363]; nuclear membrane [GO:0031965]; nucleoplasm [GO:0005654]; nucleosome [GO:0000786]; nucleus [GO:0005634]	histone binding [GO:0042393]; lysine-acetylated histone binding [GO:0070577]; modification-dependent protein binding [GO:0140030]; structural constituent of cytoskeleton [GO:0005200]	25|24|19|22	90	22.5	4	3|5|4|3|4|2|3|2|4|3|1|0|0|0|1|0|1|0|0|0|1|0|0|0|0|0|1|2|0|1|3|2|0|0|0|0|0|0|0|0|2|2|0|0	1	1	1	1	1	10.14	19.8	0	Helka	10 / 716	1.5	4	10	TRUE	IntAct	pubmed:35140242|imex:IM-28767	intact-miscore:0.27
MYC	BioID	P01106	O96019	Prey	P01106_O96019	ACTL6A	Actin-like protein 6A (53 kDa BRG1-associated factor A) (Actin-related protein Baf53a) (ArpNbeta) (BRG1-associated factor 53A) (BAF53A) (INO80 complex subunit K)	ACTL6A BAF53 BAF53A INO80K	429	blastocyst formation [GO:0001825]; chromatin remodeling [GO:0006338]; DNA recombination [GO:0006310]; DNA repair [GO:0006281]; negative regulation of cell differentiation [GO:0045596]; nervous system development [GO:0007399]; neural retina development [GO:0003407]; positive regulation of cell differentiation [GO:0045597]; positive regulation of cell population proliferation [GO:0008284]; positive…	brahma complex [GO:0035060]; chromatin [GO:0000785]; GBAF complex [GO:0140288]; Ino80 complex [GO:0031011]; kinetochore [GO:0000776]; npBAF complex [GO:0071564]; NuA4 histone acetyltransferase complex [GO:0035267]; nuclear matrix [GO:0016363]; nucleoplasm [GO:0005654]; nucleosome [GO:0000786]; nucleus [GO:0005634]; plasma membrane [GO:0005886]; protein-containing complex [GO:0032991]; RSC-type co…	chromatin binding [GO:0003682]; transcription coactivator activity [GO:0003713]	34|33|34|36	137	34.25	4	20|19|20|16|23|15|18|12|19|16|7|5|4|5|9|10|12|1|5|7|6|8|6|8|1|1|11|6|2|2|8|9|1|0|6|7|2|7|0|1|17|16|4|5	0.88	0.93	0.88	0.93	0.88	1.65	4	0.03	Helka	135 / 716	4.8	19	135	TRUE	IntAct	pubmed:17314511|imex:IM-24178|pubmed:25609649|pubmed:35140242|imex:IM-28767	intact-miscore:0.61|intact-miscore:0.61|intact-miscore:0.61
MYC	BioID	P01106	P01106	Bait	P01106_P01106	MYC	Myc proto-oncogene protein (Class E basic helix-loop-helix protein 39) (bHLHe39) (Proto-oncogene c-Myc) (Transcription factor p64)	MYC BHLHE39	454	branching involved in ureteric bud morphogenesis [GO:0001658]; cellular response to hypoxia [GO:0071456]; cellular response to UV [GO:0034644]; cellular response to xenobiotic stimulus [GO:0071466]; chromatin remodeling [GO:0006338]; chromosome organization [GO:0051276]; DNA damage response [GO:0006974]; DNA methylation-dependent heterochromatin formation [GO:0006346]; ERK1 and ERK2 cascade [GO:0…	chromatin [GO:0000785]; Myc-Max complex [GO:0071943]; nucleolus [GO:0005730]; nucleoplasm [GO:0005654]; nucleus [GO:0005634]; protein-containing complex [GO:0032991]; RNA polymerase II transcription repressor complex [GO:0090571]	core promoter sequence-specific DNA binding [GO:0001046]; DNA binding [GO:0003677]; DNA-binding transcription activator activity, RNA polymerase II-specific [GO:0001228]; DNA-binding transcription factor activity, RNA polymerase II-specific [GO:0000981]; DNA-binding transcription factor binding [GO:0140297]; DNA-binding transcription repressor activity, RNA polymerase II-specific [GO:0001227]; E-…	18|18|14|15	65	16.25	4	0|0|0|0|0|0|0|0|0|0|0|0|0|0|0|0|0|0|0|0|0|0|0|0|0|0|0|0|0|0|0|0|0|0|0|0|0|0|0|0|0|0|0|0	1	1	1	1	1	22.03	162.5	0	Helka	1 / 716	1	1	1	TRUE	IntAct	imex:IM-24178|pubmed:25609649|imex:IM-24178|pubmed:25609649	intact-miscore:0.35|intact-miscore:0.35
MYC	BioID	P01106	P04843	Prey	P01106_P04843	RPN1	Dolichyl-diphosphooligosaccharide--protein glycosyltransferase subunit 1 (Dolichyl-diphosphooligosaccharide--protein glycosyltransferase 67 kDa subunit) (Ribophorin I) (RPN-I) (Ribophorin-1)	RPN1	607	protein N-linked glycosylation [GO:0006487]; protein N-linked glycosylation via asparagine [GO:0018279]	cytosol [GO:0005829]; endoplasmic reticulum [GO:0005783]; endoplasmic reticulum membrane [GO:0005789]; melanosome [GO:0042470]; membrane [GO:0016020]; oligosaccharyltransferase complex [GO:0008250]; rough endoplasmic reticulum [GO:0005791]	RNA binding [GO:0003723]	5|3|7|3	18	4.5	4	0|0|2|0|0|0|0|0|0|0|0|0|0|0|0|0|0|0|0|0|0|0|0|0|0|0|0|0|0|0|0|0|0|0|0|0|0|0|0|0|0|0|0|0	0.99	1	0.99	1	0.99	4.6	45	0	Helka	246 / 716	4.3	37	246	TRUE	IntAct	pubmed:17314511|pubmed:35140242|imex:IM-28767	intact-miscore:0.48|intact-miscore:0.48
MYC	BioID	P01106	P05023	Prey	P01106_P05023	ATP1A1	Sodium/potassium-transporting ATPase subunit alpha-1 (Na(+)/K(+) ATPase alpha-1 subunit) (EC 7.2.2.13) (Sodium pump subunit alpha-1)	ATP1A1	1023	cardiac muscle cell action potential involved in contraction [GO:0086002]; cell communication by electrical coupling involved in cardiac conduction [GO:0086064]; cellular response to steroid hormone stimulus [GO:0071383]; establishment or maintenance of transmembrane electrochemical gradient [GO:0010248]; intracellular potassium ion homeostasis [GO:0030007]; intracellular sodium ion homeostasis […	apical plasma membrane [GO:0016324]; axon [GO:0030424]; basolateral plasma membrane [GO:0016323]; endoplasmic reticulum [GO:0005783]; extracellular exosome [GO:0070062]; extracellular vesicle [GO:1903561]; Golgi apparatus [GO:0005794]; lateral plasma membrane [GO:0016328]; melanosome [GO:0042470]; membrane [GO:0016020]; membrane raft [GO:0045121]; organelle membrane [GO:0031090]; photoreceptor in…	ATP binding [GO:0005524]; ATP hydrolysis activity [GO:0016887]; P-type sodium:potassium-exchanging transporter activity [GO:0005391]; phosphatase activity [GO:0016791]; potassium ion binding [GO:0030955]; protein heterodimerization activity [GO:0046982]; protein-folding chaperone binding [GO:0051087]; sodium ion binding [GO:0031402]; steroid hormone binding [GO:1990239]	5|5|3|6	19	4.75	4	0|0|0|1|0|0|0|0|0|0|0|0|0|0|0|0|0|0|0|0|0|0|0|0|0|0|0|0|0|0|0|0|0|0|0|0|0|0|0|0|0|0|0|0	1	1	1	1	1	4.6	47.5	0	Helka	335 / 716	7.3	88	335	TRUE	IntAct	pubmed:17314511	intact-miscore:0.35
MYC	BioID	P01106	P08708	Prey	P01106_P08708	RPS17	Small ribosomal subunit protein eS17 (40S ribosomal protein S17)	RPS17 RPS17L	135	cytoplasmic translation [GO:0002181]; erythrocyte homeostasis [GO:0034101]; ribosomal small subunit biogenesis [GO:0042274]; rRNA processing [GO:0006364]; translation [GO:0006412]; translational initiation [GO:0006413]	cytoplasm [GO:0005737]; cytosol [GO:0005829]; cytosolic ribosome [GO:0022626]; cytosolic small ribosomal subunit [GO:0022627]; focal adhesion [GO:0005925]; membrane [GO:0016020]; nucleolus [GO:0005730]; nucleoplasm [GO:0005654]; ribosome [GO:0005840]; small-subunit processome [GO:0032040]; synapse [GO:0045202]	RNA binding [GO:0003723]; structural constituent of ribosome [GO:0003735]	8|10|9|7	34	8.5	4	4|4|10|5|7|4|5|4|6|4|3|1|3|3|2|1|2|0|0|1|0|0|0|0|0|0|1|0|0|0|1|1|0|0|0|0|0|0|0|0|0|0|0|1	0.78	0.87	0.78	0.87	0.78	0.77	5.12	0.05	Helka	342 / 716	5.4	52	342	TRUE	IntAct	pubmed:35140242|imex:IM-28767	intact-miscore:0.27
MYC	BioID	P01106	P0C0S5	Prey	P01106_P0C0S5	H2AZ1	Histone H2A.Z (H2A/z)	H2AZ1 H2AFZ H2AZ	128	cellular response to estradiol stimulus [GO:0071392]; chromatin organization [GO:0006325]; positive regulation of transcription by RNA polymerase II [GO:0045944]	euchromatin [GO:0000791]; extracellular exosome [GO:0070062]; heterochromatin [GO:0000792]; nucleosome [GO:0000786]; nucleus [GO:0005634]	chromatin DNA binding [GO:0031490]; DNA binding [GO:0003677]; nucleosomal DNA binding [GO:0031492]; protein heterodimerization activity [GO:0046982]; RNA polymerase II cis-regulatory region sequence-specific DNA binding [GO:0000978]; RNA polymerase II core promoter sequence-specific DNA binding [GO:0000979]; structural constituent of chromatin [GO:0030527]	10|7|9|7	33	8.25	4	4|5|5|0|7|2|6|1|7|4|0|0|0|0|0|2|0|2|0|2|0|0|1|2|0|0|2|0|0|0|0|1|0|0|0|0|0|0|0|0|0|5|2|3	0.82	0.91	0.82	0.91	0.82	1.07	5.76	0.05	Helka	491 / 716	6.1	144	491	TRUE	IntAct	pubmed:21150319|imex:IM-16995	intact-miscore:0.35
MYC	BioID	P01106	P10244	Prey	P01106_P10244	MYBL2	Myb-related protein B (B-Myb) (Myb-like protein 2)	MYBL2 BMYB	700	cellular response to leukemia inhibitory factor [GO:1990830]; mitotic cell cycle [GO:0000278]; mitotic spindle assembly [GO:0090307]; positive regulation of neuron apoptotic process [GO:0043525]; positive regulation of transcription by RNA polymerase II [GO:0045944]	cytosol [GO:0005829]; Myb complex [GO:0031523]; nucleoplasm [GO:0005654]; nucleus [GO:0005634]	DNA-binding transcription activator activity, RNA polymerase II-specific [GO:0001228]; DNA-binding transcription factor activity, RNA polymerase II-specific [GO:0000981]; RNA polymerase II cis-regulatory region sequence-specific DNA binding [GO:0000978]; sequence-specific double-stranded DNA binding [GO:1990837]	6|4|4|4	18	4.5	4	3|2|0|0|0|0|1|1|1|2|0|0|0|0|0|0|0|0|0|0|0|0|0|0|0|0|0|0|0|0|0|0|0|0|0|0|0|0|0|0|0|0|0|0	0.97	0.99	0.97	0.99	0.97	3.09	19.8	0.01	Helka	21 / 716	1.6	6	21	TRUE	IntAct	pubmed:35140242|imex:IM-28767	intact-miscore:0.27
MYC	BioID	P01106	P21675	Prey	P01106_P21675	TAF1	Transcription initiation factor TFIID subunit 1 (EC 2.3.1.48) (EC 2.7.11.1) (Cell cycle gene 1 protein) (TBP-associated factor 250 kDa) (p250) (Transcription initiation factor TFIID 250 kDa subunit) (TAF(II)250) (TAFII-250) (TAFII250)	TAF1 BA2R CCG1 CCGS TAF2A	1893	cell cycle [GO:0007049]; cellular response to ATP [GO:0071318]; cellular response to UV [GO:0034644]; DNA damage response [GO:0006974]; midbrain development [GO:0030901]; mRNA transcription by RNA polymerase II [GO:0042789]; negative regulation of gene expression [GO:0010629]; negative regulation of protein autoubiquitination [GO:1905524]; negative regulation of transcription by RNA polymerase II…	chromatin [GO:0000785]; MLL1 complex [GO:0071339]; nucleoplasm [GO:0005654]; nucleus [GO:0005634]; transcription factor TFIID complex [GO:0005669]; transcription regulator complex [GO:0005667]	ATP binding [GO:0005524]; histone acetyltransferase activity [GO:0004402]; kinase activity [GO:0016301]; lysine-acetylated histone binding [GO:0070577]; nuclear receptor binding [GO:0016922]; p53 binding [GO:0002039]; protein heterodimerization activity [GO:0046982]; protein kinase activity [GO:0004672]; protein serine kinase activity [GO:0106310]; protein serine/threonine kinase activity [GO:000…	6|8|6|5	25	6.25	4	6|3|0|4|5|4|4|3|3|3|0|0|0|0|0|0|0|0|0|0|0|0|0|0|0|0|3|5|0|0|0|3|0|0|0|0|0|0|0|0|0|4|0|0	0.76	0.88	0.76	0.88	0.76	0.61	5.5	0.06	Helka	92 / 716	7.2	42	92	TRUE	IntAct	pubmed:35140242|imex:IM-28767	intact-miscore:0.27
MYC	BioID	P01106	P21796	Prey	P01106_P21796	VDAC1	Voltage-dependent anion-selective channel protein 1 (VDAC-1) (hVDAC1) (Outer mitochondrial membrane protein porin 1) (Plasmalemmal porin) (Porin 31HL) (Porin 31HM)	VDAC1 VDAC	283	apoptotic process [GO:0006915]; behavioral fear response [GO:0001662]; epithelial cell differentiation [GO:0030855]; learning [GO:0007612]; monoatomic anion transport [GO:0006820]; negative regulation of apoptotic process [GO:0043066]; negative regulation of calcium import into the mitochondrion [GO:0110099]; negative regulation of reactive oxygen species metabolic process [GO:2000378]; neuron-ne…	extracellular exosome [GO:0070062]; membrane [GO:0016020]; membrane raft [GO:0045121]; mitochondrial membrane [GO:0031966]; mitochondrial nucleoid [GO:0042645]; mitochondrial outer membrane [GO:0005741]; mitochondrial permeability transition pore complex [GO:0005757]; mitochondrion [GO:0005739]; nucleus [GO:0005634]; plasma membrane [GO:0005886]; pore complex [GO:0046930]; synapse [GO:0045202]	ceramide binding [GO:0097001]; cholesterol binding [GO:0015485]; identical protein binding [GO:0042802]; phosphatidylcholine binding [GO:0031210]; porin activity [GO:0015288]; protein kinase binding [GO:0019901]; transmembrane transporter binding [GO:0044325]; voltage-gated monoatomic anion channel activity [GO:0008308]	6|6|6|4	22	5.5	4	0|0|5|4|4|0|1|0|0|0|0|0|1|0|3|3|1|0|0|1|0|1|0|0|0|0|0|0|0|0|0|0|0|0|0|0|0|0|0|0|0|0|0|0	0.89	0.92	0.89	0.92	0.89	1.36	10.08	0.03	Helka	213 / 716	2.8	27	213	TRUE	IntAct	pubmed:35140242|imex:IM-28767	intact-miscore:0.27
MYC	BioID	P01106	P35232	Prey	P01106_P35232	PHB1	Prohibitin 1	PHB1 PHB	272	activation of phospholipase C activity [GO:0007202]; activation of protein kinase C activity [GO:1990051]; antiviral innate immune response [GO:0140374]; B cell activation [GO:0042113]; CD40 signaling pathway [GO:0023035]; cellular response to interleukin-6 [GO:0071354]; DNA biosynthetic process [GO:0071897]; epigenetic regulation of gene expression [GO:0040029]; mitochondrion organization [GO:00…	cell surface [GO:0009986]; cytoplasm [GO:0005737]; early endosome [GO:0005769]; extracellular exosome [GO:0070062]; membrane [GO:0016020]; mitochondrial inner membrane [GO:0005743]; mitochondrial prohibitin complex [GO:0035632]; mitochondrion [GO:0005739]; nucleoplasm [GO:0005654]; nucleus [GO:0005634]; plasma membrane [GO:0005886]	complement component C3a binding [GO:0001850]; complement component C3b binding [GO:0001851]; enzyme binding [GO:0019899]; histone deacetylase binding [GO:0042826]; protein heterodimerization activity [GO:0046982]; proteinase activated receptor binding [GO:0031871]; transcription corepressor activity [GO:0003714]	9|10|11|11	41	10.25	4	0|0|4|5|3|2|0|0|0|0|0|0|0|1|1|2|0|0|0|0|0|1|0|0|0|0|0|0|0|0|0|0|0|0|0|0|0|0|0|0|0|0|0|0	0.99	0.99	0.99	0.99	0.99	4.33	23.74	0	Helka	269 / 716	5.4	33	269	TRUE	IntAct	pubmed:35140242|imex:IM-28767	intact-miscore:0.27
MYC	BioID	P01106	P35613	Prey	P01106_P35613	BSG	Basigin (5F7) (Collagenase stimulatory factor) (Extracellular matrix metalloproteinase inducer) (EMMPRIN) (Hepatoma-associated antigen) (HAb18G) (Leukocyte activation antigen M6) (OK blood group antigen) (Tumor cell-derived collagenase stimulatory factor) (TCSF) (CD antigen CD147)	BSG UNQ6505/PRO21383	385	angiogenesis [GO:0001525]; cell surface receptor signaling pathway [GO:0007166]; decidualization [GO:0046697]; embryo implantation [GO:0007566]; endothelial tube morphogenesis [GO:0061154]; neural retina development [GO:0003407]; neutrophil chemotaxis [GO:0030593]; odontogenesis of dentin-containing tooth [GO:0042475]; photoreceptor cell maintenance [GO:0045494]; positive regulation of endothelia…	acrosomal membrane [GO:0002080]; basolateral plasma membrane [GO:0016323]; endoplasmic reticulum membrane [GO:0005789]; endosome [GO:0005768]; extracellular exosome [GO:0070062]; focal adhesion [GO:0005925]; Golgi membrane [GO:0000139]; intracellular membrane-bounded organelle [GO:0043231]; melanosome [GO:0042470]; membrane [GO:0016020]; mitochondrion [GO:0005739]; photoreceptor inner segment [GO…	cadherin binding [GO:0045296]; mannose binding [GO:0005537]; signaling receptor activity [GO:0038023]; virus receptor activity [GO:0001618]	2|2|2|2	8	2	4	0|0|0|0|0|0|0|0|0|0|0|0|0|0|0|0|0|0|0|0|0|0|0|0|0|0|0|0|0|0|0|0|0|0|0|0|1|2|0|0|0|0|0|0	0.95	0.95	0.95	0.95	0.95	2.98	20	0.01	Helka	108 / 716	4.1	30	108	TRUE	IntAct	pubmed:35140242|imex:IM-28767	intact-miscore:0.27
MYC	BioID	P01106	P40939	Prey	P01106_P40939	HADHA	Trifunctional enzyme subunit alpha, mitochondrial (78 kDa gastrin-binding protein) (Monolysocardiolipin acyltransferase) (EC 2.3.1.-) (TP-alpha) [Includes: Long-chain enoyl-CoA hydratase (EC 4.2.1.17); Long chain 3-hydroxyacyl-CoA dehydrogenase (EC 1.1.1.211)]	HADHA HADH	763	cardiolipin acyl-chain remodeling [GO:0035965]; fatty acid beta-oxidation [GO:0006635]; response to insulin [GO:0032868]; response to xenobiotic stimulus [GO:0009410]	mitochondrial fatty acid beta-oxidation multienzyme complex [GO:0016507]; mitochondrial inner membrane [GO:0005743]; mitochondrial nucleoid [GO:0042645]; mitochondrion [GO:0005739]	3-hydroxyacyl-CoA dehydratase activity [GO:0018812]; 3-hydroxyacyl-CoA dehydrogenase activity [GO:0003857]; acetyl-CoA C-acetyltransferase activity [GO:0003985]; enoyl-CoA hydratase activity [GO:0004300]; fatty-acyl-CoA binding [GO:0000062]; long-chain-3-hydroxyacyl-CoA dehydrogenase activity [GO:0016509]; NAD+ binding [GO:0070403]; protein-containing complex binding [GO:0044877]	5|4|6|5	20	5	4	1|1|2|4|4|4|2|1|3|1|0|0|0|0|0|0|0|0|0|0|0|0|0|0|0|1|0|1|0|0|0|1|0|0|0|1|3|1|0|0|3|0|3|3	0.76	0.88	0.76	0.88	0.76	0.49	5.5	0.06	Helka	154 / 716	7.4	39	154	TRUE	IntAct	pubmed:26496610|imex:IM-24272|pubmed:35140242|imex:IM-28767	intact-miscore:0.48|intact-miscore:0.48
MYC	BioID	P01106	P51531	Prey	P01106_P51531	SMARCA2	Probable global transcription activator SNF2L2 (EC 3.6.4.-) (ATP-dependent helicase SMARCA2) (BRG1-associated factor 190B) (BAF190B) (Protein brahma homolog) (hBRM) (SNF2-alpha) (SWI/SNF-related matrix-associated actin-dependent regulator of chromatin subfamily A member 2)	SMARCA2 BAF190B BRM SNF2A SNF2L2	1590	chromatin remodeling [GO:0006338]; negative regulation of cell differentiation [GO:0045596]; negative regulation of cell growth [GO:0030308]; negative regulation of cell population proliferation [GO:0008285]; negative regulation of DNA-templated transcription [GO:0045892]; negative regulation of transcription by RNA polymerase II [GO:0000122]; nervous system development [GO:0007399]; positive reg…	bBAF complex [GO:0140092]; brahma complex [GO:0035060]; chromatin [GO:0000785]; GBAF complex [GO:0140288]; intermediate filament cytoskeleton [GO:0045111]; intracellular membrane-bounded organelle [GO:0043231]; nBAF complex [GO:0071565]; npBAF complex [GO:0071564]; nucleoplasm [GO:0005654]; nucleus [GO:0005634]; SWI/SNF complex [GO:0016514]	ATP binding [GO:0005524]; ATP-dependent activity, acting on DNA [GO:0008094]; ATP-dependent chromatin remodeler activity [GO:0140658]; chromatin binding [GO:0003682]; DNA binding [GO:0003677]; helicase activity [GO:0004386]; histone binding [GO:0042393]; hydrolase activity [GO:0016787]; transcription cis-regulatory region binding [GO:0000976]; transcription coactivator activity [GO:0003713]	23|19|18|19	79	19.75	4	19|18|19|10|23|14|19|7|20|11|2|0|0|0|0|0|0|0|0|0|0|0|0|0|0|0|0|9|0|0|0|0|0|0|0|0|0|0|0|0|14|13|0|0	0.78	0.86	0.78	0.86	0.78	0.98	4.39	0.05	Helka	145 / 716	5.1	52	145	TRUE	IntAct	pubmed:35140242|imex:IM-28767	intact-miscore:0.27
MYC	BioID	P01106	P51610	Prey	P01106_P51610	HCFC1	Host cell factor 1 (HCF) (HCF-1) (C1 factor) (CFF) (VCAF) (VP16 accessory protein) [Cleaved into: HCF N-terminal chain 1; HCF N-terminal chain 2; HCF N-terminal chain 3; HCF N-terminal chain 4; HCF N-terminal chain 5; HCF N-terminal chain 6; HCF C-terminal chain 1; HCF C-terminal chain 2; HCF C-terminal chain 3; HCF C-terminal chain 4; HCF C-terminal chain 5; HCF C-terminal chain 6]	HCFC1 HCF1 HFC1	2035	cell cycle [GO:0007049]; chromatin remodeling [GO:0006338]; negative regulation of transcription by RNA polymerase II [GO:0000122]; positive regulation of cell cycle [GO:0045787]; positive regulation of DNA-templated transcription [GO:0045893]; positive regulation of gene expression [GO:0010628]; positive regulation of histone H3-K4 methylation [GO:0051571]; positive regulation of transcription b…	cytoplasm [GO:0005737]; histone acetyltransferase complex [GO:0000123]; histone methyltransferase complex [GO:0035097]; membrane [GO:0016020]; MLL1 complex [GO:0071339]; MLL1/2 complex [GO:0044665]; neuronal cell body [GO:0043025]; NSL complex [GO:0044545]; nucleoplasm [GO:0005654]; nucleus [GO:0005634]; protein-containing complex [GO:0032991]; Set1C/COMPASS complex [GO:0048188]	cadherin binding [GO:0045296]; chromatin binding [GO:0003682]; DNA-binding transcription factor binding [GO:0140297]; identical protein binding [GO:0042802]; protein-macromolecule adaptor activity [GO:0030674]; transcription coactivator activity [GO:0003713]	174|186|180|177	717	179.25	4	77|77|74|51|79|43|66|42|69|60|53|41|38|27|51|50|54|22|43|45|40|43|26|38|23|22|35|47|27|30|48|52|21|22|28|29|43|51|4|2|69|58|27|30	1	1	1	1	1	4.92	4.2	0	Helka	278 / 716	23	150	278	TRUE	IntAct	pubmed:35140242|imex:IM-28767	intact-miscore:0.27
MYC	BioID	P01106	P61244	Prey	P01106_P61244	MAX	Protein max (Class D basic helix-loop-helix protein 4) (bHLHd4) (Myc-associated factor X)	MAX BHLHD4	160	cellular response to peptide hormone stimulus [GO:0071375]; cellular response to starvation [GO:0009267]; negative regulation of gene expression [GO:0010629]; negative regulation of transcription by RNA polymerase II [GO:0000122]; neuron apoptotic process [GO:0051402]; positive regulation of DNA-templated transcription [GO:0045893]; positive regulation of transcription by RNA polymerase II [GO:00…	chromatin [GO:0000785]; dendrite [GO:0030425]; Mad-Max complex [GO:0070443]; MLL1 complex [GO:0071339]; Myc-Max complex [GO:0071943]; nucleoplasm [GO:0005654]; nucleus [GO:0005634]; PML body [GO:0016605]; protein-DNA complex [GO:0032993]; RNA polymerase II transcription regulator complex [GO:0090575]	DNA binding [GO:0003677]; DNA-binding transcription factor activity [GO:0003700]; DNA-binding transcription factor activity, RNA polymerase II-specific [GO:0000981]; DNA-binding transcription factor binding [GO:0140297]; DNA-binding transcription repressor activity, RNA polymerase II-specific [GO:0001227]; E-box binding [GO:0070888]; identical protein binding [GO:0042802]; protein dimerization ac…	11|13|13|14	51	12.75	4	1|0|1|0|0|0|0|0|0|0|0|0|0|0|0|0|0|0|0|0|0|0|0|0|0|0|4|1|0|0|2|5|0|0|0|0|0|0|0|0|0|0|0|0	1	1	1	1	1	5.52	40.07	0	Helka	21 / 716	1.6	4	21	TRUE	IntAct	pubmed:9680483|mint:MINT-6548034|pubmed:12821782|mint:MINT-5216492|pubmed:12821782|mint:MINT-5216492|imex:IM-14415|pubmed:16352593|pubmed:17353931|pubmed:17157259|pubmed:17314511|pubmed:17314511|imex:IM-11876|pubmed:17418410|imex:IM-11876|pubmed:17418410|imex:IM-11876|pubmed:17418410|imex:IM-11876|pubmed:17418410|imex:IM-11876|pubmed:17418410|imex:IM-11876|pubmed:17418410|imex:IM-11876|pubmed:174…	intact-miscore:0.98|intact-miscore:0.98|intact-miscore:0.98|intact-miscore:0.98|author score:0.339|author score:"Number of different experiments interaction was observed in: 1"|author score:high|intact-miscore:0.98|intact-miscore:0.98|intact-miscore:0.98|intact-miscore:0.98|intact-miscore:0.98|intact-miscore:0.98|intact-miscore:0.98|intact-miscore:0.98|intact-miscore:0.98|intact-miscore:0.98|inta…
MYC	BioID	P01106	P61964	Prey	P01106_P61964	WDR5	WD repeat-containing protein 5 (BMP2-induced 3-kb gene protein)	WDR5 BIG3	334	gluconeogenesis [GO:0006094]; negative regulation of transcription by RNA polymerase II [GO:0000122]; positive regulation of DNA-templated transcription [GO:0045893]; positive regulation of gluconeogenesis [GO:0045722]; positive regulation of histone H3-K4 methylation [GO:0051571]; regulation of cell cycle [GO:0051726]; regulation of cell division [GO:0051302]; regulation of DNA-templated transcr…	ATAC complex [GO:0140672]; histone acetyltransferase complex [GO:0000123]; histone methyltransferase complex [GO:0035097]; mitotic spindle [GO:0072686]; MLL1 complex [GO:0071339]; MLL1/2 complex [GO:0044665]; MLL3/4 complex [GO:0044666]; NSL complex [GO:0044545]; nucleoplasm [GO:0005654]; nucleus [GO:0005634]; Set1C/COMPASS complex [GO:0048188]	histone binding [GO:0042393]; histone H3K4 methyltransferase activity [GO:0042800]; methylated histone binding [GO:0035064]	16|13|18|17	64	16	4	7|7|12|6|9|4|7|2|7|5|7|7|6|4|5|4|6|3|5|5|6|6|2|3|3|2|0|0|0|2|8|9|3|2|6|5|4|3|0|1|9|8|6|6	0.76	0.97	0.76	0.97	0.76	-1.03	3.32	0.06	Helka	99 / 716	3.1	10	99	TRUE	IntAct	pubmed:17353931|pubmed:35140242|imex:IM-28767	author score:"Number of different experiments interaction was observed in: 1"|author score:0.198|intact-miscore:0.54|intact-miscore:0.54
MYC	BioID	P01106	Q03164	Prey	P01106_Q03164	KMT2A	Histone-lysine N-methyltransferase 2A (Lysine N-methyltransferase 2A) (EC 2.1.1.364) (ALL-1) (CXXC-type zinc finger protein 7) (Cysteine methyltransferase KMT2A) (EC 2.1.1.-) (Myeloid/lymphoid or mixed-lineage leukemia) (Myeloid/lymphoid or mixed-lineage leukemia protein 1) (Trithorax-like protein) (Zinc finger protein HRX) [Cleaved into: MLL cleavage product N320 (N-terminal cleavage product of …	KMT2A ALL1 CXXC7 HRX HTRX MLL MLL1 TRX1	3969	anterior/posterior pattern specification [GO:0009952]; apoptotic process [GO:0006915]; cellular response to transforming growth factor beta stimulus [GO:0071560]; circadian regulation of gene expression [GO:0032922]; definitive hemopoiesis [GO:0060216]; DNA methylation [GO:0006306]; embryonic hemopoiesis [GO:0035162]; epigenetic regulation of gene expression [GO:0040029]; exploration behavior [GO…	cytosol [GO:0005829]; histone methyltransferase complex [GO:0035097]; MLL1 complex [GO:0071339]; nucleoplasm [GO:0005654]; nucleus [GO:0005634]	chromatin binding [GO:0003682]; histone H3K4 methyltransferase activity [GO:0042800]; histone H3K4 monomethyltransferase activity [GO:0140945]; histone H3K4 trimethyltransferase activity [GO:0140999]; identical protein binding [GO:0042802]; lysine-acetylated histone binding [GO:0070577]; minor groove of adenine-thymine-rich DNA binding [GO:0003680]; protein homodimerization activity [GO:0042803];…	6|4|5|8	23	5.75	4	2|1|1|1|2|1|0|1|1|2|1|1|0|1|1|0|1|0|1|0|0|0|0|0|0|0|1|8|1|0|2|7|0|0|1|0|0|1|0|0|1|0|0|0	0.78	0.93	0.78	0.93	0.78	0.47	6.33	0.06	Helka	88 / 716	7.3	25	88	TRUE	IntAct	pubmed:21150319|imex:IM-16995|pubmed:35140242|imex:IM-28767	intact-miscore:0.48|intact-miscore:0.48
MYC	BioID	P01106	Q05BQ5	Prey	P01106_Q05BQ5	MBTD1	MBT domain-containing protein 1	MBTD1	628	chromatin organization [GO:0006325]; double-strand break repair via homologous recombination [GO:0000724]; embryonic skeletal system development [GO:0048706]; negative regulation of DNA-templated transcription [GO:0045892]; positive regulation of DNA-templated transcription [GO:0045893]; positive regulation of double-strand break repair via homologous recombination [GO:1905168]; regulation of apo…	NuA4 histone acetyltransferase complex [GO:0035267]; nucleosome [GO:0000786]; nucleus [GO:0005634]; site of double-strand break [GO:0035861]	chromatin binding [GO:0003682]; methylated histone binding [GO:0035064]; NuA4 histone acetyltransferase complex binding [GO:0062060]; zinc ion binding [GO:0008270]	22|23|23|25	93	23.25	4	0|0|0|0|0|0|0|0|0|0|0|0|0|0|0|0|0|0|0|0|0|0|0|0|0|0|0|0|0|0|0|0|0|0|0|0|0|0|0|0|1|1|0|0	1	1	1	1	1	33.9	232.5	0	Helka	6 / 716	1.2	2	6	TRUE	IntAct	pubmed:35140242|imex:IM-28767	intact-miscore:0.27
MYC	BioID	P01106	Q12962	Prey	P01106_Q12962	TAF10	Transcription initiation factor TFIID subunit 10 (STAF28) (Transcription initiation factor TFIID 30 kDa subunit) (TAF(II)30) (TAFII-30) (TAFII30)	TAF10 TAF2A TAF2H TAFII30	218	allantois development [GO:1905069]; apoptotic process [GO:0006915]; chromatin remodeling [GO:0006338]; DNA-templated transcription initiation [GO:0006352]; embryonic placenta development [GO:0001892]; G1/S transition of mitotic cell cycle [GO:0000082]; hepatocyte differentiation [GO:0070365]; lateral mesodermal cell differentiation [GO:0048371]; limb development [GO:0060173]; mRNA transcription b…	cytoplasm [GO:0005737]; male germ cell nucleus [GO:0001673]; nucleoplasm [GO:0005654]; nucleus [GO:0005634]; perinuclear region of cytoplasm [GO:0048471]; SAGA complex [GO:0000124]; transcription factor TFIID complex [GO:0005669]; transcription factor TFTC complex [GO:0033276]; transcription preinitiation complex [GO:0097550]	DNA binding [GO:0003677]; enzyme binding [GO:0019899]; identical protein binding [GO:0042802]; nuclear estrogen receptor binding [GO:0030331]; promoter-specific chromatin binding [GO:1990841]; RNA polymerase binding [GO:0070063]; RNA polymerase II general transcription initiation factor activity [GO:0016251]	8|7|7|8	30	7.5	4	4|4|4|1|3|2|3|1|2|2|2|0|0|0|0|0|0|0|0|0|0|1|0|0|0|1|2|1|1|1|2|3|0|0|1|1|1|1|0|0|3|3|1|1	0.97	0.98	0.97	0.98	0.97	3.06	6.35	0.01	Helka	52 / 716	2	10	52	TRUE	IntAct	pubmed:35140242|imex:IM-28767	intact-miscore:0.27
MYC	BioID	P01106	Q14186	Prey	P01106_Q14186	TFDP1	Transcription factor Dp-1 (DRTF1-polypeptide 1) (DRTF1) (E2F dimerization partner 1)	TFDP1 DP1	410	anoikis [GO:0043276]; epidermis development [GO:0008544]; negative regulation of fat cell proliferation [GO:0070345]; positive regulation of DNA-binding transcription factor activity [GO:0051091]; positive regulation of G1/S transition of mitotic cell cycle [GO:1900087]; positive regulation of transcription by RNA polymerase II [GO:0045944]; regulation of DNA biosynthetic process [GO:2000278]; re…	chromatin [GO:0000785]; cytoplasm [GO:0005737]; cytosol [GO:0005829]; nucleoplasm [GO:0005654]; nucleus [GO:0005634]; Rb-E2F complex [GO:0035189]; RNA polymerase II transcription regulator complex [GO:0090575]	cis-regulatory region sequence-specific DNA binding [GO:0000987]; DNA-binding transcription factor activity [GO:0003700]; DNA-binding transcription factor activity, RNA polymerase II-specific [GO:0000981]; DNA-binding transcription factor binding [GO:0140297]; protein domain specific binding [GO:0019904]	11|11|8|9	39	9.75	4	5|3|1|1|1|2|3|3|6|5|1|0|1|0|0|0|0|0|0|0|0|0|0|0|0|0|1|2|1|0|4|2|0|0|0|0|0|0|0|0|1|1|0|1	0.96	0.98	0.96	0.98	0.96	2.5	9.53	0.01	Helka	64 / 716	1.9	5	64	TRUE	IntAct	pubmed:35140242|imex:IM-28767	intact-miscore:0.27
MYC	BioID	P01106	Q14CW9	Prey	P01106_Q14CW9	ATXN7L3	Ataxin-7-like protein 3 (SAGA-associated factor 11 homolog)	ATXN7L3	347	chromatin organization [GO:0006325]; positive regulation of DNA-templated transcription [GO:0045893]; regulation of DNA repair [GO:0006282]; regulation of RNA splicing [GO:0043484]; regulation of transcription by RNA polymerase II [GO:0006357]	DUBm complex [GO:0071819]; nucleus [GO:0005634]; SAGA complex [GO:0000124]; transcription factor TFTC complex [GO:0033276]	nuclear receptor coactivator activity [GO:0030374]; transcription coactivator activity [GO:0003713]; zinc ion binding [GO:0008270]	15|14|14|15	58	14.5	4	0|0|0|0|0|0|0|0|0|0|0|0|0|0|0|0|0|0|0|0|0|0|0|0|0|0|0|1|0|0|0|0|0|0|0|0|0|0|0|0|0|0|0|0	1	1	1	1	1	22.03	145	0	Helka	/ 716	0		0	TRUE	IntAct	pubmed:35140242|imex:IM-28767	intact-miscore:0.27
MYC	BioID	P01106	Q15014	Prey	P01106_Q15014	MORF4L2	Mortality factor 4-like protein 2 (MORF-related gene X protein) (Protein MSL3-2) (Transcription factor-like protein MRGX)	MORF4L2 KIAA0026 MRGX	288	chromatin organization [GO:0006325]; DNA repair [GO:0006281]; positive regulation of DNA-templated transcription [GO:0045893]; positive regulation of double-strand break repair via homologous recombination [GO:1905168]; positive regulation of striated muscle cell differentiation [GO:0051155]; positive regulation of transcription by RNA polymerase II [GO:0045944]; regulation of apoptotic process […	NuA4 histone acetyltransferase complex [GO:0035267]; nucleolus [GO:0005730]; nucleoplasm [GO:0005654]; nucleosome [GO:0000786]; plasma membrane [GO:0005886]		13|11|12|11	47	11.75	4	0|0|0|0|0|0|0|0|0|0|0|0|0|0|0|0|0|0|0|0|0|0|0|0|0|0|0|0|0|0|0|0|0|0|0|0|0|0|0|0|0|0|0|0	1	1	1	1	1	17.49	117.5	0	Helka	76 / 716	3	16	76	TRUE	IntAct	pubmed:35140242|imex:IM-28767	intact-miscore:0.27
MYC	BioID	P01106	Q15291	Prey	P01106_Q15291	RBBP5	Retinoblastoma-binding protein 5 (RBBP-5) (Retinoblastoma-binding protein RBQ-3)	RBBP5 RBQ3	538	DNA damage response [GO:0006974]; response to estrogen [GO:0043627]; transcription initiation-coupled chromatin remodeling [GO:0045815]	histone methyltransferase complex [GO:0035097]; MLL1 complex [GO:0071339]; MLL1/2 complex [GO:0044665]; MLL3/4 complex [GO:0044666]; nucleolus [GO:0005730]; nucleoplasm [GO:0005654]; nucleus [GO:0005634]; Set1C/COMPASS complex [GO:0048188]	histone binding [GO:0042393]; transcription cis-regulatory region binding [GO:0000976]	11|12|15|14	52	13	4	6|6|6|4|9|6|5|3|4|4|2|0|0|0|1|1|4|0|0|0|1|0|0|0|0|1|2|3|0|0|4|3|0|0|0|1|0|0|0|0|2|0|0|2	0.94	0.98	0.94	0.98	0.94	2.21	7.15	0.01	Helka	75 / 716	2	8	75	TRUE	IntAct	pubmed:35140242|imex:IM-28767	intact-miscore:0.27
MYC	BioID	P01106	Q15906	Prey	P01106_Q15906	VPS72	Vacuolar protein sorting-associated protein 72 homolog (Protein YL-1) (Transcription factor-like 1)	VPS72 TCFL1 YL1	364	chromatin remodeling [GO:0006338]; negative regulation of transcription by RNA polymerase II [GO:0000122]; positive regulation of DNA-templated transcription [GO:0045893]; positive regulation of double-strand break repair via homologous recombination [GO:1905168]; regulation of apoptotic process [GO:0042981]; regulation of cell cycle [GO:0051726]; regulation of DNA-templated transcription [GO:000…	NuA4 histone acetyltransferase complex [GO:0035267]; nuclear speck [GO:0016607]; nucleoplasm [GO:0005654]; nucleosome [GO:0000786]; nucleus [GO:0005634]; protein-containing complex [GO:0032991]	ATP-dependent H2AZ histone chaperone activity [GO:0140849]; DNA binding [GO:0003677]; histone binding [GO:0042393]; histone chaperone activity [GO:0140713]	24|20|25|21	90	22.5	4	2|1|0|0|2|0|0|0|1|0|0|0|0|0|0|0|0|0|0|0|0|0|0|0|0|0|1|2|0|0|0|2|0|0|0|0|0|0|0|0|1|2|0|0	1	1	1	1	1	20.62	70.71	0	Helka	16 / 716	1.6	5	16	TRUE	IntAct	pubmed:35140242|imex:IM-28767	intact-miscore:0.27
MYC	BioID	P01106	Q16514	Prey	P01106_Q16514	TAF12	Transcription initiation factor TFIID subunit 12 (Transcription initiation factor TFIID 20/15 kDa subunits) (TAFII-20/TAFII-15) (TAFII20/TAFII15)	TAF12 TAF15 TAF2J TAFII20	161	DNA-templated transcription initiation [GO:0006352]; mRNA transcription by RNA polymerase II [GO:0042789]; positive regulation of DNA-templated transcription [GO:0045893]; positive regulation of transcription by RNA polymerase II [GO:0045944]; positive regulation of transcription initiation by RNA polymerase II [GO:0060261]; regulation of DNA repair [GO:0006282]; regulation of DNA-templated trans…	nucleoplasm [GO:0005654]; nucleus [GO:0005634]; SAGA complex [GO:0000124]; SLIK (SAGA-like) complex [GO:0046695]; transcription factor TFIID complex [GO:0005669]; transcription factor TFTC complex [GO:0033276]	DNA binding [GO:0003677]; DNA-binding transcription factor binding [GO:0140297]; protein heterodimerization activity [GO:0046982]; TBP-class protein binding [GO:0017025]; transcription coactivator activity [GO:0003713]	7|5|5|7	24	6	4	0|0|2|0|1|0|0|0|0|0|0|0|0|0|0|0|0|0|0|0|0|0|0|0|0|0|3|2|0|0|0|0|0|0|0|0|0|0|0|0|1|1|1|0	0.99	1	0.99	1	0.99	4.05	24	0	Helka	11 / 716	1.8	3	11	TRUE	IntAct	pubmed:35140242|imex:IM-28767	intact-miscore:0.27
MYC	BioID	P01106	Q16594	Prey	P01106_Q16594	TAF9	Transcription initiation factor TFIID subunit 9 (RNA polymerase II TBP-associated factor subunit G) (STAF31/32) (Transcription initiation factor TFIID 31 kDa subunit) (TAFII-31) (TAFII31) (Transcription initiation factor TFIID 32 kDa subunit) (TAFII-32) (TAFII32)	TAF9 TAF2G TAFII31	264	box C/D snoRNP assembly [GO:0000492]; chromatin remodeling [GO:0006338]; DNA damage response [GO:0006974]; mRNA transcription by RNA polymerase II [GO:0042789]; negative regulation of apoptotic process [GO:0043066]; negative regulation of intrinsic apoptotic signaling pathway in response to DNA damage by p53 class mediator [GO:1902166]; negative regulation of proteasomal ubiquitin-dependent prote…	MLL1 complex [GO:0071339]; nucleoplasm [GO:0005654]; nucleus [GO:0005634]; pre-snoRNP complex [GO:0070761]; SAGA complex [GO:0000124]; transcription factor TFIID complex [GO:0005669]; transcription factor TFTC complex [GO:0033276]	ATPase binding [GO:0051117]; C2H2 zinc finger domain binding [GO:0070742]; DNA binding [GO:0003677]; DNA-binding transcription factor binding [GO:0140297]; p53 binding [GO:0002039]; protein heterodimerization activity [GO:0046982]; RNA polymerase II general transcription initiation factor activity [GO:0016251]; transcription cis-regulatory region binding [GO:0000976]; transcription coactivator ac…	12|12|12|11	47	11.75	4	0|4|0|0|0|0|0|0|0|0|0|0|0|0|0|0|0|0|0|0|0|0|0|0|0|0|0|2|0|0|0|0|0|0|0|0|0|0|0|0|2|0|0|0	1	1	1	1	1	6.8	64.62	0	Helka	94 / 716	4.1	27	94	TRUE	IntAct	pubmed:35140242|imex:IM-28767	intact-miscore:0.27
MYC	BioID	P01106	Q52LR7	Prey	P01106_Q52LR7	EPC2	Enhancer of polycomb homolog 2 (EPC-like)	EPC2	807	chromatin organization [GO:0006325]; DNA repair [GO:0006281]; positive regulation of DNA-templated transcription [GO:0045893]; positive regulation of double-strand break repair via homologous recombination [GO:1905168]; regulation of apoptotic process [GO:0042981]; regulation of cell cycle [GO:0051726]; regulation of double-strand break repair [GO:2000779]; regulation of transcription by RNA poly…	NuA4 histone acetyltransferase complex [GO:0035267]; nucleosome [GO:0000786]; nucleus [GO:0005634]; Piccolo NuA4 histone acetyltransferase complex [GO:0032777]		35|34|34|36	139	34.75	4	0|0|0|0|0|0|0|0|0|0|0|1|0|0|0|0|0|0|0|0|0|0|0|0|0|0|1|0|0|0|0|0|0|0|0|0|0|0|0|0|1|0|0|0	1	1	1	1	1	51.36	347.5	0	Helka	2 / 716	1	1	2	TRUE	IntAct	pubmed:35140242|imex:IM-28767	intact-miscore:0.27
MYC	BioID	P01106	Q5JTH9	Prey	P01106_Q5JTH9	RRP12	RRP12-like protein	RRP12 KIAA0690	1297	rRNA processing [GO:0006364]	cytosol [GO:0005829]; intracellular membrane-bounded organelle [GO:0043231]; nuclear membrane [GO:0031965]; nucleolus [GO:0005730]; plasma membrane [GO:0005886]	RNA binding [GO:0003723]	18|16|15|17	66	16.5	4	6|4|8|7|12|8|5|3|3|4|3|3|1|2|1|2|3|0|4|3|5|4|0|1|0|0|5|9|0|0|0|4|0|0|2|2|0|6|3|8|13|11|8|7	0.87	0.93	0.87	0.93	0.87	1.31	4.27	0.03	Helka	176 / 716	4	27	176	TRUE	IntAct	pubmed:35140242|imex:IM-28767	intact-miscore:0.27
MYC	BioID	P01106	Q5T6C5	Prey	P01106_Q5T6C5	ATXN7L2	Ataxin-7-like protein 2	ATXN7L2	722				15|11|14|15	55	13.75	4	0|0|0|0|0|0|0|0|0|0|0|0|0|0|0|0|0|0|0|0|0|0|0|0|0|0|0|0|0|0|0|0|0|0|0|0|0|0|0|0|0|0|0|0	1	1	1	1	1	17.49	137.5	0	Helka	/ 716	0		0	TRUE	IntAct	pubmed:35140242|imex:IM-28767	intact-miscore:0.27
MYC	BioID	P01106	Q5TKA1	Prey	P01106_Q5TKA1	LIN9	Protein lin-9 homolog (HuLin-9) (hLin-9) (Beta subunit-associated regulator of apoptosis) (TUDOR gene similar protein) (Type I interferon receptor beta chain-associated protein) (pRB-associated protein)	LIN9 BARA TGS	542	cell cycle [GO:0007049]; DNA biosynthetic process [GO:0071897]; DNA-templated transcription [GO:0006351]; regulation of cell cycle [GO:0051726]; regulation of transcription by RNA polymerase II [GO:0006357]; reproduction [GO:0000003]	nucleoplasm [GO:0005654]; transcription repressor complex [GO:0017053]	DNA binding [GO:0003677]	6|8|6|4	24	6	4	2|1|1|1|1|0|2|1|1|1|0|0|0|0|0|0|1|0|0|0|0|0|0|0|0|0|1|3|0|0|0|0|0|0|0|0|0|0|0|0|0|0|0|0	0.99	1	0.99	1	0.99	3.12	16.5	0	Helka	4 / 716	1	1	4	TRUE	IntAct	pubmed:35140242|imex:IM-28767	intact-miscore:0.27
MYC	BioID	P01106	Q68CP9	Prey	P01106_Q68CP9	ARID2	AT-rich interactive domain-containing protein 2 (ARID domain-containing protein 2) (BRG1-associated factor 200) (BAF200) (Zinc finger protein with activation potential) (Zipzap/p200)	ARID2 BAF200 KIAA1557	1835	cardiac muscle cell proliferation [GO:0060038]; chromatin remodeling [GO:0006338]; coronary artery morphogenesis [GO:0060982]; embryonic organ development [GO:0048568]; heart morphogenesis [GO:0003007]; homeostatic process [GO:0042592]; negative regulation of cell migration [GO:0030336]; negative regulation of cell population proliferation [GO:0008285]; nucleosome disassembly [GO:0006337]; positi…	chromatin [GO:0000785]; kinetochore [GO:0000776]; nuclear matrix [GO:0016363]; nucleoplasm [GO:0005654]; plasma membrane [GO:0005886]; RSC-type complex [GO:0016586]; SWI/SNF complex [GO:0016514]	DNA binding [GO:0003677]; metal ion binding [GO:0046872]	5|7|6|11	29	7.25	4	0|1|3|2|3|2|0|0|0|0|1|0|0|0|0|0|1|0|1|0|1|0|0|0|0|0|5|5|0|1|1|4|0|0|0|1|0|0|0|0|6|6|0|1	0.82	0.97	0.82	0.97	0.82	0.78	7.09	0.04	Helka	75 / 716	5.2	28	75	TRUE	IntAct	pubmed:35140242|imex:IM-28767	intact-miscore:0.27
MYC	BioID	P01106	Q6MZP7	Prey	P01106_Q6MZP7	LIN54	Protein lin-54 homolog (CXC domain-containing protein 1)	LIN54 CXCDC1 KIAA2037	749	cell cycle [GO:0007049]; nucleosome organization [GO:0034728]; regulation of DNA-templated transcription [GO:0006355]	nucleoplasm [GO:0005654]; nucleus [GO:0005634]; RNA polymerase II transcription repressor complex [GO:0090571]	metal ion binding [GO:0046872]; minor groove of adenine-thymine-rich DNA binding [GO:0003680]; transcription regulatory region nucleic acid binding [GO:0001067]	12|10|12|14	48	12	4	8|7|4|1|2|2|4|1|9|4|0|1|0|0|0|0|1|0|0|0|0|0|0|0|0|0|11|5|1|1|9|9|1|0|2|2|1|0|0|0|7|4|0|2	0.84	0.9	0.84	0.9	0.84	1.12	5.33	0.04	Helka	37 / 716	1.6	6	37	TRUE	IntAct	pubmed:35140242|imex:IM-28767	intact-miscore:0.27
MYC	BioID	P01106	Q6ZN08	Prey	P01106_Q6ZN08	ZNF66	Putative zinc finger protein 66 (Zinc finger protein 66 pseudogene)	ZNF66 ZNF66P	573	regulation of DNA-templated transcription [GO:0006355]	nucleus [GO:0005634]	DNA-binding transcription factor activity, RNA polymerase II-specific [GO:0000981]; metal ion binding [GO:0046872]; RNA polymerase II cis-regulatory region sequence-specific DNA binding [GO:0000978]	4|4|4|0	12	3	4	0|0|3|0|0|0|0|0|0|0|0|0|0|1|0|0|0|0|0|0|0|0|0|0|0|0|0|0|0|0|0|0|0|0|0|0|0|0|0|0|0|0|0|0	0.74	0.99	0.74	0.99	0.74	-1.81	30	0.07	Helka	34 / 716	1.5	4	34	TRUE	IntAct	pubmed:35140242|imex:IM-28767	intact-miscore:0.27
MYC	BioID	P01106	Q6ZRS2	Prey	P01106_Q6ZRS2	SRCAP	Helicase SRCAP (EC 3.6.4.-) (Domino homolog 2) (Snf2-related CBP activator)	SRCAP KIAA0309	3230	chromatin remodeling [GO:0006338]; regulation of DNA-templated transcription [GO:0006355]; regulation of transcription by RNA polymerase II [GO:0006357]	Golgi apparatus [GO:0005794]; nuclear body [GO:0016604]; nucleoplasm [GO:0005654]; nucleosome [GO:0000786]; nucleus [GO:0005634]; perinuclear region of cytoplasm [GO:0048471]; protein-containing complex [GO:0032991]; Swr1 complex [GO:0000812]	ATP binding [GO:0005524]; ATP hydrolysis activity [GO:0016887]; ATP-dependent chromatin remodeler activity [GO:0140658]; DNA binding [GO:0003677]; helicase activity [GO:0004386]; histone acetyltransferase activity [GO:0004402]; histone binding [GO:0042393]; transcription coactivator activity [GO:0003713]	11|11|11|14	47	11.75	4	9|9|4|5|10|7|9|6|7|4|0|0|0|0|1|0|3|0|0|0|0|0|1|1|1|0|6|10|1|0|1|5|0|1|1|3|0|1|0|0|3|5|0|0	0.78	0.88	0.78	0.88	0.78	1.1	4.54	0.05	Helka	41 / 716	3.7	15	41	TRUE	IntAct	pubmed:35140242|imex:IM-28767	intact-miscore:0.27
MYC	BioID	P01106	Q76L83	Prey	P01106_Q76L83	ASXL2	Putative Polycomb group protein ASXL2 (Additional sex combs-like protein 2)	ASXL2 ASXH2 KIAA1685	1435	animal organ morphogenesis [GO:0009887]; positive regulation of fat cell differentiation [GO:0045600]; positive regulation of peroxisome proliferator activated receptor signaling pathway [GO:0035360]; positive regulation of transcription by RNA polymerase II [GO:0045944]	nucleoplasm [GO:0005654]; PR-DUB complex [GO:0035517]	chromatin binding [GO:0003682]; DNA binding [GO:0003677]; metal ion binding [GO:0046872]; peroxisome proliferator activated receptor binding [GO:0042975]	6|7|7|5	25	6.25	4	2|1|0|1|0|0|0|0|1|1|0|0|0|0|0|0|0|0|0|0|0|0|0|0|0|0|0|0|0|0|0|0|0|0|0|0|0|0|0|0|1|0|0|0	1	1	1	1	1	7.89	39.29	0	Helka	8 / 716	1.1	2	8	TRUE	IntAct	pubmed:35140242|imex:IM-28767	intact-miscore:0.27
MYC	BioID	P01106	Q7Z3B3	Prey	P01106_Q7Z3B3	KANSL1	KAT8 regulatory NSL complex subunit 1 (MLL1/MLL complex subunit KANSL1) (MSL1 homolog 1) (hMSL1v1) (NSL complex protein NSL1) (Non-specific lethal 1 homolog)	KANSL1 CENP-36 KIAA1267 MSL1V1 NSL1	1105	chromatin organization [GO:0006325]; positive regulation of DNA-templated transcription [GO:0045893]; positive regulation of histone H3-K4 methylation [GO:0051571]; regulation of dosage compensation by inactivation of X chromosome [GO:1900095]	histone acetyltransferase complex [GO:0000123]; kinetochore [GO:0000776]; MLL1 complex [GO:0071339]; NSL complex [GO:0044545]; nucleoplasm [GO:0005654]; nucleus [GO:0005634]	histone acetyltransferase binding [GO:0035035]	13|12|8|8	41	10.25	4	1|2|1|1|1|0|1|0|0|0|0|0|0|0|0|0|0|0|0|0|0|0|0|0|0|0|1|2|0|0|0|0|0|0|0|0|0|0|0|0|0|0|0|0	1	1	1	1	1	11.26	45.1	0	Helka	2 / 716	1	1	2	TRUE	IntAct	pubmed:35140242|imex:IM-28767	intact-miscore:0.27
MYC	BioID	P01106	Q7Z589	Prey	P01106_Q7Z589	EMSY	BRCA2-interacting transcriptional repressor EMSY	EMSY C11orf30 GL002	1322	chromatin organization [GO:0006325]; DNA repair [GO:0006281]; regulation of DNA-templated transcription [GO:0006355]	nucleoplasm [GO:0005654]	identical protein binding [GO:0042802]	10|12|15|14	51	12.75	4	3|3|6|2|4|3|4|2|3|3|0|0|0|0|4|0|3|0|2|1|2|1|1|1|0|0|10|14|0|1|2|6|1|0|1|1|0|1|0|0|6|5|2|1	0.88	0.94	0.88	0.94	0.88	1.21	5.67	0.03	Helka	90 / 716	7.5	49	90	TRUE	IntAct	pubmed:35140242|imex:IM-28767	intact-miscore:0.27
MYC	BioID	P01106	Q86TJ2	Prey	P01106_Q86TJ2	TADA2B	Transcriptional adapter 2-beta (ADA2-like protein beta) (ADA2-beta)	TADA2B ADA2B	420	chromatin remodeling [GO:0006338]; positive regulation of DNA-templated transcription [GO:0045893]; regulation of DNA repair [GO:0006282]; regulation of histone acetylation [GO:0035065]; regulation of RNA splicing [GO:0043484]; regulation of transcription by RNA polymerase II [GO:0006357]	nucleoplasm [GO:0005654]; nucleus [GO:0005634]; SAGA complex [GO:0000124]; SAGA-type complex [GO:0070461]	chromatin binding [GO:0003682]; transcription coactivator activity [GO:0003713]; zinc ion binding [GO:0008270]	26|21|24|23	94	23.5	4	1|2|1|1|2|3|2|1|1|1|0|0|0|0|0|0|0|0|0|0|0|0|0|0|0|0|0|1|0|0|0|2|0|0|0|0|0|0|0|0|1|3|1|0	1	1	1	1	1	21.49	44.96	0	Helka	14 / 716	1.4	2	14	TRUE	IntAct	pubmed:35140242|imex:IM-28767	intact-miscore:0.27
MYC	BioID	P01106	Q86U86	Prey	P01106_Q86U86	PBRM1	Protein polybromo-1 (hPB1) (BRG1-associated factor 180) (BAF180) (Polybromo-1D)	PBRM1 BAF180 PB1	1689	chromatin remodeling [GO:0006338]; mitotic cell cycle [GO:0000278]; negative regulation of cell population proliferation [GO:0008285]; positive regulation of cell differentiation [GO:0045597]; positive regulation of double-strand break repair [GO:2000781]; positive regulation of myoblast differentiation [GO:0045663]; positive regulation of T cell differentiation [GO:0045582]; regulation of G0 to …	chromatin [GO:0000785]; kinetochore [GO:0000776]; nuclear chromosome [GO:0000228]; nuclear matrix [GO:0016363]; nucleoplasm [GO:0005654]; nucleus [GO:0005634]; RSC-type complex [GO:0016586]; SWI/SNF complex [GO:0016514]	chromatin binding [GO:0003682]; DNA binding [GO:0003677]	26|23|27|31	107	26.75	4	6|2|12|8|14|10|2|3|4|2|1|1|0|0|2|0|5|0|0|0|0|0|0|1|1|0|2|3|0|0|1|6|0|0|0|4|0|2|0|0|14|24|8|4	0.96	0.98	0.96	0.98	0.96	2.67	8.29	0.01	Helka	49 / 716	3	11	49	TRUE	IntAct	pubmed:35140242|imex:IM-28767	intact-miscore:0.27
MYC	BioID	P01106	Q8IWI9	Prey	P01106_Q8IWI9	MGA	MAX gene-associated protein (MAX dimerization protein 5)	MGA KIAA0518 MAD5	3065	cell fate specification [GO:0001708]; positive regulation of DNA-templated transcription [GO:0045893]; regulation of transcription by RNA polymerase II [GO:0006357]	chromatin [GO:0000785]; MLL1 complex [GO:0071339]; nucleoplasm [GO:0005654]	DNA-binding transcription factor activity, RNA polymerase II-specific [GO:0000981]; protein dimerization activity [GO:0046983]; RNA polymerase II cis-regulatory region sequence-specific DNA binding [GO:0000978]	43|40|43|49	175	43.75	4	2|1|4|0|4|0|2|0|2|0|1|2|2|1|1|0|1|0|1|1|0|0|0|0|0|0|11|10|0|1|8|11|0|0|0|2|0|3|0|0|4|8|0|0	1	1	1	1	1	7.72	23.19	0	Helka	124 / 716	6.6	45	124	TRUE	IntAct	pubmed:35140242|imex:IM-28767	intact-miscore:0.27
MYC	BioID	P01106	Q8IYH5	Prey	P01106_Q8IYH5	ZZZ3	ZZ-type zinc finger-containing protein 3	ZZZ3	903	chromatin organization [GO:0006325]; regulation of cell cycle [GO:0051726]; regulation of cell division [GO:0051302]; regulation of DNA-templated transcription [GO:0006355]; regulation of embryonic development [GO:0045995]; regulation of transcription by RNA polymerase II [GO:0006357]; regulation of tubulin deacetylation [GO:0090043]	ATAC complex [GO:0140672]; mitotic spindle [GO:0072686]; nucleolus [GO:0005730]; nucleoplasm [GO:0005654]	DNA binding [GO:0003677]; lysine-acetylated histone binding [GO:0070577]; methylated histone binding [GO:0035064]; zinc ion binding [GO:0008270]	35|36|26|27	124	31	4	4|6|18|4|16|6|7|1|4|3|6|6|5|2|5|3|3|0|0|1|3|3|0|3|2|0|7|12|1|2|4|4|3|0|3|3|1|1|0|0|12|7|3|4	0.99	1	0.99	1	0.99	3.91	7.66	0	Helka	16 / 716	1.9	4	16	TRUE	IntAct	pubmed:35140242|imex:IM-28767	intact-miscore:0.27
MYC	BioID	P01106	Q8NEM7	Prey	P01106_Q8NEM7	SUPT20H	Transcription factor SPT20 homolog (p38-interacting protein) (p38IP)	SUPT20H C13orf19 FAM48A FP757	779	autophagy [GO:0006914]; gastrulation [GO:0007369]; positive regulation of DNA-templated transcription [GO:0045893]; regulation of DNA repair [GO:0006282]; regulation of RNA splicing [GO:0043484]; regulation of transcription by RNA polymerase II [GO:0006357]	nucleus [GO:0005634]; SAGA complex [GO:0000124]; SAGA-type complex [GO:0070461]	transcription coregulator activity [GO:0003712]	35|29|36|31	131	32.75	4	1|1|0|0|1|1|0|0|0|0|0|0|0|0|0|0|0|0|0|0|0|0|0|0|0|0|0|0|0|0|1|2|0|0|0|0|0|0|0|0|2|0|0|0	1	1	1	1	1	39.32	160.11	0	Helka	24 / 716	1.5	4	24	TRUE	IntAct	pubmed:35140242|imex:IM-28767	intact-miscore:0.27
MYC	BioID	P01106	Q8NHM5	Prey	P01106_Q8NHM5	KDM2B	Lysine-specific demethylase 2B (EC 1.14.11.27) (CXXC-type zinc finger protein 2) (F-box and leucine-rich repeat protein 10) (F-box protein FBL10) (F-box/LRR-repeat protein 10) (JmjC domain-containing histone demethylation protein 1B) (Jumonji domain-containing EMSY-interactor methyltransferase motif protein) (Protein JEMMA) (Protein-containing CXXC domain 2) ([Histone-H3]-lysine-36 demethylase 1B)	KDM2B CXXC2 FBL10 FBXL10 JHDM1B NDY1 PCCX2	1336	chromatin remodeling [GO:0006338]; embryonic camera-type eye morphogenesis [GO:0048596]; forebrain development [GO:0030900]; fourth ventricle development [GO:0021592]; hindbrain development [GO:0030902]; initiation of neural tube closure [GO:0021993]; lateral ventricle development [GO:0021670]; midbrain development [GO:0030901]; midbrain-hindbrain boundary morphogenesis [GO:0021555]; negative reg…	chromosome [GO:0005694]; nucleolus [GO:0005730]; nucleoplasm [GO:0005654]; nucleus [GO:0005634]; PcG protein complex [GO:0031519]	DNA binding [GO:0003677]; histone demethylase activity [GO:0032452]; histone H3K36 demethylase activity [GO:0051864]; histone H3K36me/H3K36me2 demethylase activity [GO:0140680]; RNA polymerase II cis-regulatory region sequence-specific DNA binding [GO:0000978]; rRNA binding [GO:0019843]; transcription coregulator activity [GO:0003712]; unmethylated CpG binding [GO:0045322]; zinc ion binding [GO:0…	7|7|8|9	31	7.75	4	1|3|1|0|4|2|2|2|4|2|0|0|0|0|0|0|1|0|0|1|1|0|0|0|0|0|5|5|0|0|0|0|0|0|0|0|0|0|0|0|2|1|0|0	0.94	0.97	0.94	0.97	0.94	2.38	9.22	0.02	Helka	23 / 716	1.5	4	23	TRUE	IntAct	pubmed:35140242|imex:IM-28767	intact-miscore:0.27
MYC	BioID	P01106	Q8WUU5	Prey	P01106_Q8WUU5	GATAD1	GATA zinc finger domain-containing protein 1 (Ocular development-associated gene protein)	GATAD1 ODAG	269	chromatin organization [GO:0006325]; chromatin remodeling [GO:0006338]; regulation of DNA-templated transcription [GO:0006355]	nucleoplasm [GO:0005654]; nucleus [GO:0005634]	sequence-specific DNA binding [GO:0043565]; zinc ion binding [GO:0008270]	4|4|7|7	22	5.5	4	1|3|1|2|0|1|1|1|1|1|0|0|0|0|0|0|0|0|0|0|0|0|0|0|0|0|0|0|0|0|0|2|0|0|0|1|0|0|0|0|1|2|0|1	0.97	1	0.97	1	0.97	2.82	12.74	0.01	Helka	1 / 716	2	2	1	TRUE	IntAct	pubmed:35140242|imex:IM-28767	intact-miscore:0.27
MYC	BioID	P01106	Q92560	Prey	P01106_Q92560	BAP1	Ubiquitin carboxyl-terminal hydrolase BAP1 (EC 3.4.19.12) (BRCA1-associated protein 1) (Cerebral protein 6)	BAP1 KIAA0272 hucep-6	729	common myeloid progenitor cell proliferation [GO:0035726]; erythrocyte maturation [GO:0043249]; gene expression [GO:0010467]; hematopoietic stem cell homeostasis [GO:0061484]; in utero embryonic development [GO:0001701]; leukocyte proliferation [GO:0070661]; macrophage homeostasis [GO:0061519]; mitotic cell cycle [GO:0000278]; monoubiquitinated protein deubiquitination [GO:0035520]; myeloid cell …	cytoplasm [GO:0005737]; cytosol [GO:0005829]; nucleoplasm [GO:0005654]; nucleus [GO:0005634]; PR-DUB complex [GO:0035517]	chromatin binding [GO:0003682]; chromatin DNA binding [GO:0031490]; cysteine-type deubiquitinase activity [GO:0004843]; histone H2A deubiquitinase activity [GO:0140950]; peptidase activity [GO:0008233]	17|18|16|14	65	16.25	4	1|1|1|2|0|0|1|0|1|0|0|0|0|0|0|1|0|0|0|0|0|0|0|0|0|0|2|3|0|0|0|0|0|0|0|0|0|0|0|0|1|1|0|0	1	1	1	1	1	15.39	47.67	0	Helka	26 / 716	2.8	9	26	TRUE	IntAct	pubmed:35140242|imex:IM-28767	intact-miscore:0.27
MYC	BioID	P01106	Q92793	Prey	P01106_Q92793	CREBBP	CREB-binding protein (Histone lysine acetyltransferase CREBBP) (EC 2.3.1.48) (Protein-lysine acetyltransferase CREBBP) (EC 2.3.1.-)	CREBBP CBP	2442	cellular response to nutrient levels [GO:0031669]; cellular response to UV [GO:0034644]; embryonic digit morphogenesis [GO:0042733]; homeostatic process [GO:0042592]; N-terminal peptidyl-lysine acetylation [GO:0018076]; negative regulation of transcription by RNA polymerase I [GO:0016479]; negative regulation of transcription by RNA polymerase II [GO:0000122]; non-canonical NF-kappaB signal trans…	chromatin [GO:0000785]; cytoplasm [GO:0005737]; cytosol [GO:0005829]; histone acetyltransferase complex [GO:0000123]; nuclear body [GO:0016604]; nucleoplasm [GO:0005654]; nucleus [GO:0005634]; transcription regulator complex [GO:0005667]	acetyltransferase activity [GO:0016407]; chromatin binding [GO:0003682]; chromatin DNA binding [GO:0031490]; damaged DNA binding [GO:0003684]; DNA-binding transcription factor binding [GO:0140297]; histone acetyltransferase activity [GO:0004402]; MRF binding [GO:0043426]; p53 binding [GO:0002039]; peptide N-acetyltransferase activity [GO:0034212]; peptide-lysine-N-acetyltransferase activity [GO:0…	3|3|3|3	12	3	4	0|3|0|0|0|0|0|0|4|0|0|0|0|0|1|1|1|0|0|0|0|0|0|0|0|0|0|0|0|0|0|1|0|0|0|0|0|0|0|0|0|0|0|0	0.87	0.87	0.87	0.87	0.87	1.91	12	0.03	Helka	18 / 716	1.1	2	18	TRUE	IntAct	pubmed:35140242|imex:IM-28767	intact-miscore:0.27
MYC	BioID	P01106	Q92830	Prey	P01106_Q92830	KAT2A	Histone acetyltransferase KAT2A (EC 2.3.1.48) (General control of amino acid synthesis protein 5-like 2) (Histone acetyltransferase GCN5) (hGCN5) (Histone glutaryltransferase KAT2A) (EC 2.3.1.-) (Histone succinyltransferase KAT2A) (EC 2.3.1.-) (Lysine acetyltransferase 2A) (STAF97)	KAT2A GCN5 GCN5L2	837	cellular response to nerve growth factor stimulus [GO:1990090]; cellular response to tumor necrosis factor [GO:0071356]; chromatin remodeling [GO:0006338]; fibroblast proliferation [GO:0048144]; gluconeogenesis [GO:0006094]; heart development [GO:0007507]; histone succinylation [GO:0106077]; in utero embryonic development [GO:0001701]; internal peptidyl-lysine acetylation [GO:0018393]; intracellu…	ATAC complex [GO:0140672]; centrosome [GO:0005813]; cytoplasm [GO:0005737]; extracellular space [GO:0005615]; histone acetyltransferase complex [GO:0000123]; mitotic spindle [GO:0072686]; nucleoplasm [GO:0005654]; nucleus [GO:0005634]; SAGA complex [GO:0000124]; transcription factor TFTC complex [GO:0033276]	chromatin binding [GO:0003682]; DNA-binding transcription factor binding [GO:0140297]; histone acetyltransferase activity [GO:0004402]; histone deacetylase binding [GO:0042826]; histone glutaryltransferase activity [GO:0106229]; histone H3 acetyltransferase activity [GO:0010484]; histone H3K18 acetyltransferase activity [GO:0043993]; histone H3K9 acetyltransferase activity [GO:0043992]; histone H…	42|41|38|42	163	40.75	4	2|2|1|3|6|5|1|0|4|1|0|0|0|0|0|0|1|0|0|0|0|0|0|0|0|0|0|0|0|0|1|1|0|0|0|1|0|0|0|0|1|0|1|1	1	1	1	1	1	15.8	56.03	0	Helka	/ 716	0		0	TRUE	IntAct	pubmed:35140242|imex:IM-28767	intact-miscore:0.27
MYC	BioID	P01106	Q92831	Prey	P01106_Q92831	KAT2B	Histone acetyltransferase KAT2B (EC 2.3.1.48) (Histone acetyltransferase PCAF) (Histone acetylase PCAF) (Lysine acetyltransferase 2B) (P300/CBP-associated factor) (P/CAF) (Spermidine acetyltransferase KAT2B) (EC 2.3.1.57)	KAT2B PCAF	832	cell cycle [GO:0007049]; cellular response to insulin stimulus [GO:0032869]; cellular response to oxidative stress [GO:0034599]; cellular response to parathyroid hormone stimulus [GO:0071374]; chromatin remodeling [GO:0006338]; gluconeogenesis [GO:0006094]; heart development [GO:0007507]; internal peptidyl-lysine acetylation [GO:0018393]; limb development [GO:0060173]; memory [GO:0007613]; N-term…	A band [GO:0031672]; actomyosin [GO:0042641]; ATAC complex [GO:0140672]; centrosome [GO:0005813]; cytosol [GO:0005829]; I band [GO:0031674]; kinetochore [GO:0000776]; mitotic spindle [GO:0072686]; nucleoplasm [GO:0005654]; nucleus [GO:0005634]; protein-containing complex [GO:0032991]; SAGA complex [GO:0000124]	acetyltransferase activity [GO:0016407]; chromatin binding [GO:0003682]; cyclin-dependent protein serine/threonine kinase inhibitor activity [GO:0004861]; diamine N-acetyltransferase activity [GO:0004145]; DNA-binding transcription factor binding [GO:0140297]; histone acetyltransferase activity [GO:0004402]; histone acetyltransferase binding [GO:0035035]; histone deacetylase binding [GO:0042826];…	26|25|25|22	98	24.5	4	0|0|0|0|0|0|0|0|0|0|0|0|0|0|0|0|0|0|0|0|0|0|0|0|0|0|0|3|0|0|0|0|0|0|0|0|0|0|0|0|0|0|0|0	1	1	1	1	1	16.04	245	0	Helka	2 / 716	1	1	2	TRUE	IntAct	pubmed:35140242|imex:IM-28767	intact-miscore:0.27
MYC	BioID	P01106	Q92993	Prey	P01106_Q92993	KAT5	Histone acetyltransferase KAT5 (EC 2.3.1.48) (60 kDa Tat-interactive protein) (Tip60) (Histone acetyltransferase HTATIP) (HIV-1 Tat interactive protein) (Lysine acetyltransferase 5) (Protein 2-hydroxyisobutyryltransferase KAT5) (EC 2.3.1.-) (Protein acetyltransferase KAT5) (EC 2.3.1.-) (Protein crotonyltransferase KAT5) (EC 2.3.1.-) (cPLA(2)-interacting protein)	KAT5 HTATIP TIP60	513	apoptotic process [GO:0006915]; cellular response to estradiol stimulus [GO:0071392]; cellular response to glucose starvation [GO:0042149]; cellular response to glucose stimulus [GO:0071333]; cellular senescence [GO:0090398]; DNA damage response [GO:0006974]; DNA damage response, signal transduction by p53 class mediator resulting in transcription of p21 class mediator [GO:0006978]; DNA repair-de…	chromatin [GO:0000785]; cytoplasm [GO:0005737]; cytosol [GO:0005829]; intracellular membrane-bounded organelle [GO:0043231]; kinetochore [GO:0000776]; mitotic spindle pole [GO:0097431]; MSL complex [GO:0072487]; NuA4 histone acetyltransferase complex [GO:0035267]; nucleolus [GO:0005730]; nucleoplasm [GO:0005654]; nucleosome [GO:0000786]; nucleus [GO:0005634]; perinuclear region of cytoplasm [GO:0…	acetyltransferase activity [GO:0016407]; chromatin binding [GO:0003682]; DNA-binding transcription factor binding [GO:0140297]; histone acetyltransferase activity [GO:0004402]; histone H2A acetyltransferase activity [GO:0043998]; histone H2AK5 acetyltransferase activity [GO:0043999]; histone H4 acetyltransferase activity [GO:0010485]; histone H4K16 acetyltransferase activity [GO:0046972]; metal i…	44|41|42|43	170	42.5	4	0|0|0|0|0|0|0|0|0|0|0|0|0|0|0|0|0|0|0|0|0|0|0|0|0|0|0|1|0|0|0|0|0|0|0|0|0|0|0|0|0|0|0|0	1	1	1	1	1	61.45	425	0	Helka	7 / 716	1.3	2	7	TRUE	IntAct	pubmed:35140242|imex:IM-28767	intact-miscore:0.27
MYC	BioID	P01106	Q969R5	Prey	P01106_Q969R5	L3MBTL2	Lethal(3)malignant brain tumor-like protein 2 (H-l(3)mbt-like protein 2) (L(3)mbt-like protein 2)	L3MBTL2	705	chromatin organization [GO:0006325]; negative regulation of DNA-templated transcription [GO:0045892]	nucleoplasm [GO:0005654]; nucleus [GO:0005634]	chromatin binding [GO:0003682]; histone binding [GO:0042393]; methylated histone binding [GO:0035064]; zinc ion binding [GO:0008270]	6|8|9|11	34	8.5	4	0|0|0|0|0|0|0|0|0|0|0|0|0|0|0|0|0|0|0|0|0|0|0|0|0|0|1|2|0|0|0|0|0|0|0|0|0|0|0|0|0|0|0|0	1	1	1	1	1	11.9	85	0	Helka	8 / 716	1.6	3	8	TRUE	IntAct	pubmed:35140242|imex:IM-28767	intact-miscore:0.27
MYC	BioID	P01106	Q96AG4	Prey	P01106_Q96AG4	LRRC59	Leucine-rich repeat-containing protein 59 (Ribosome-binding protein p34) (p34) [Cleaved into: Leucine-rich repeat-containing protein 59, N-terminally processed]	LRRC59 PRO1855	307	signal transduction [GO:0007165]	cytoplasm [GO:0005737]; endoplasmic reticulum [GO:0005783]; endoplasmic reticulum membrane [GO:0005789]; intracellular membrane-bounded organelle [GO:0043231]; membrane [GO:0016020]; mitochondrial nucleoid [GO:0042645]; nuclear envelope [GO:0005635]	cadherin binding [GO:0045296]; RNA binding [GO:0003723]	2|5|6|8	21	5.25	4	0|0|4|4|4|2|1|1|1|2|0|0|0|0|2|3|1|1|2|1|0|0|0|0|0|0|0|0|0|0|0|0|0|0|0|0|0|0|0|0|0|0|0|0	0.78	0.98	0.78	0.98	0.78	-0.55	7.97	0.06	Helka	175 / 716	3.7	18	175	TRUE	IntAct	pubmed:35140242|imex:IM-28767	intact-miscore:0.27
MYC	BioID	P01106	Q96BN2	Prey	P01106_Q96BN2	TADA1	Transcriptional adapter 1 (SPT3-associated factor 42) (STAF42) (Transcriptional adapter 1-like protein)	TADA1 TADA1L	335	positive regulation of DNA-templated transcription [GO:0045893]; regulation of DNA repair [GO:0006282]; regulation of RNA splicing [GO:0043484]; regulation of transcription by RNA polymerase II [GO:0006357]	cytosol [GO:0005829]; focal adhesion [GO:0005925]; nucleoplasm [GO:0005654]; nucleus [GO:0005634]; SAGA complex [GO:0000124]	transcription coactivator activity [GO:0003713]	17|18|19|20	74	18.5	4	3|3|0|2|3|1|0|0|3|1|0|0|0|0|0|0|0|0|0|0|0|0|0|0|0|0|2|1|0|0|2|0|0|0|0|0|0|0|0|0|0|0|0|0	1	1	1	1	1	10.35	38.76	0	Helka	17 / 716	2.3	6	17	TRUE	IntAct	pubmed:35140242|imex:IM-28767	intact-miscore:0.27
MYC	BioID	P01106	Q96ES7	Prey	P01106_Q96ES7	SGF29	SAGA-associated factor 29 (Coiled-coil domain-containing protein 101) (SAGA complex-associated factor 29)	SGF29 CCDC101	293	establishment of protein localization to chromatin [GO:0071169]; negative regulation of transcription by RNA polymerase II [GO:0000122]; positive regulation of DNA-templated transcription [GO:0045893]; regulation of cell cycle [GO:0051726]; regulation of cell division [GO:0051302]; regulation of DNA repair [GO:0006282]; regulation of DNA-templated transcription [GO:0006355]; regulation of embryon…	ATAC complex [GO:0140672]; mitotic spindle [GO:0072686]; nucleoplasm [GO:0005654]; SAGA complex [GO:0000124]; SAGA-type complex [GO:0070461]	methylated histone binding [GO:0035064]	16|14|15|13	58	14.5	4	2|2|3|2|4|2|3|2|2|2|2|2|0|1|1|0|2|0|1|1|2|0|1|0|0|0|1|1|0|0|3|0|0|0|0|0|2|1|0|0|2|3|2|1	1	1	1	1	1	16.72	12.04	0	Helka	17 / 716	1.5	3	17	TRUE	IntAct	pubmed:35140242|imex:IM-28767	intact-miscore:0.27
MYC	BioID	P01106	Q96EZ8	Prey	P01106_Q96EZ8	MCRS1	Microspherule protein 1 (58 kDa microspherule protein) (Cell cycle-regulated factor p78) (INO80 complex subunit J) (MCRS2)	MCRS1 INO80Q MSP58	462	chromatin remodeling [GO:0006338]; DNA recombination [GO:0006310]; DNA repair [GO:0006281]; negative regulation of telomerase activity [GO:0051974]; negative regulation of telomere maintenance via telomere lengthening [GO:1904357]; positive regulation of DNA repair [GO:0045739]; positive regulation of DNA-templated transcription [GO:0045893]; positive regulation of histone H3-K4 methylation [GO:0…	cytoplasm [GO:0005737]; dendrite [GO:0030425]; histone acetyltransferase complex [GO:0000123]; Ino80 complex [GO:0031011]; MLL1 complex [GO:0071339]; NSL complex [GO:0044545]; nucleolus [GO:0005730]; nucleoplasm [GO:0005654]; nucleus [GO:0005634]; perikaryon [GO:0043204]; polysome [GO:0005844]	G-quadruplex RNA binding [GO:0002151]; poly(G) binding [GO:0034046]; poly(U) RNA binding [GO:0008266]; telomerase inhibitor activity [GO:0010521]	9|10|7|8	34	8.5	4	0|1|0|0|0|0|2|0|2|1|0|0|0|0|0|0|0|0|0|0|0|0|0|0|0|0|2|0|0|0|0|0|0|0|0|0|0|0|0|0|0|0|0|0	1	1	1	1	1	6.96	46.75	0	Helka	2 / 716	1	1	2	TRUE	IntAct	pubmed:35140242|imex:IM-28767	intact-miscore:0.27
MYC	BioID	P01106	Q96GY3	Prey	P01106_Q96GY3	LIN37	Protein lin-37 homolog (Antolefinin)	LIN37 MSTP064	246	negative regulation of transcription by RNA polymerase II [GO:0000122]	Myb complex [GO:0031523]; nucleoplasm [GO:0005654]; transcription repressor complex [GO:0017053]		3|4|2|4	13	3.25	4	1|1|0|0|0|0|1|0|1|0|0|0|0|0|0|0|0|0|0|0|0|0|0|0|0|0|1|1|0|0|0|0|0|0|0|0|1|0|0|0|1|0|0|0	0.95	0.99	0.95	0.99	0.95	1.64	17.88	0.01	Helka	3 / 716	1.3	2	3	TRUE	IntAct	pubmed:35140242|imex:IM-28767	intact-miscore:0.27
MYC	BioID	P01106	Q96L91	Prey	P01106_Q96L91	EP400	E1A-binding protein p400 (EC 3.6.4.-) (CAG repeat protein 32) (Domino homolog) (hDomino) (Trinucleotide repeat-containing gene 12 protein) (p400 kDa SWI2/SNF2-related protein)	EP400 CAGH32 KIAA1498 KIAA1818 TNRC12	3159	DNA repair [GO:0006281]; positive regulation of DNA-templated transcription [GO:0045893]; positive regulation of double-strand break repair via homologous recombination [GO:1905168]; regulation of apoptotic process [GO:0042981]; regulation of cell cycle [GO:0051726]; regulation of double-strand break repair [GO:2000779]	NuA4 histone acetyltransferase complex [GO:0035267]; nuclear speck [GO:0016607]; nucleoplasm [GO:0005654]; nucleosome [GO:0000786]; Swr1 complex [GO:0000812]	ATP binding [GO:0005524]; ATP-dependent chromatin remodeler activity [GO:0140658]; chromatin binding [GO:0003682]; DNA binding [GO:0003677]; helicase activity [GO:0004386]; hydrolase activity [GO:0016787]; protein antigen binding [GO:1990405]	209|207|210|211	837	209.25	4	1|5|7|5|7|4|4|1|2|3|4|2|1|1|2|2|2|0|2|2|2|2|1|2|0|0|7|15|1|0|1|9|0|0|1|1|0|1|0|0|13|10|3|1	1	1	1	1	1	40.27	72.5	0	Helka	89 / 716	7.3	58	89	TRUE	IntAct	pubmed:17314511|pubmed:21150319|imex:IM-16995|pubmed:21150319|imex:IM-16995|pubmed:18413597|doi:10.1073/pnas.0802095105|imex:IM-9227|pubmed:35140242|imex:IM-28767|pubmed:35140242|imex:IM-28767	intact-miscore:0.76|intact-miscore:0.76|intact-miscore:0.76|intact-miscore:0.76|intact-miscore:0.76|intact-miscore:0.76
MYC	BioID	P01106	Q96QT6	Prey	P01106_Q96QT6	PHF12	PHD finger protein 12 (PHD factor 1) (Pf1)	PHF12 KIAA1523	1004	negative regulation of DNA-templated transcription [GO:0045892]; negative regulation of transcription by RNA polymerase II [GO:0000122]	nucleoplasm [GO:0005654]; nucleus [GO:0005634]; Sin3 complex [GO:0016580]; Sin3-type complex [GO:0070822]; transcription repressor complex [GO:0017053]	metal ion binding [GO:0046872]; phosphatidylinositol binding [GO:0035091]; transcription corepressor activity [GO:0003714]; transcription corepressor binding [GO:0001222]	12|15|10|14	51	12.75	4	1|0|2|0|3|1|2|0|1|0|1|3|2|0|3|1|1|0|1|1|1|1|0|0|0|0|0|5|0|0|0|3|0|0|0|0|0|0|0|0|2|3|0|0	1	1	1	1	1	5.48	14.76	0	Helka	16 / 716	1.1	2	16	TRUE	IntAct	pubmed:35140242|imex:IM-28767	intact-miscore:0.27
MYC	BioID	P01106	Q99623	Prey	P01106_Q99623	PHB2	Prohibitin-2 (B-cell receptor-associated protein BAP37) (D-prohibitin) (Repressor of estrogen receptor activity)	PHB2 BAP REA	299	activation of phospholipase C activity [GO:0007202]; activation of protein kinase C activity [GO:1990051]; antiviral innate immune response [GO:0140374]; B cell activation [GO:0042113]; CD40 signaling pathway [GO:0023035]; cell migration [GO:0016477]; cellular response to hypoxia [GO:0071456]; cellular response to retinoic acid [GO:0071300]; intracellular estrogen receptor signaling pathway [GO:0…	axon [GO:0030424]; cell periphery [GO:0071944]; cell surface [GO:0009986]; cytoplasm [GO:0005737]; GABA-ergic synapse [GO:0098982]; glutamatergic synapse [GO:0098978]; mitochondrial inner membrane [GO:0005743]; mitochondrial outer membrane [GO:0005741]; mitochondrial prohibitin complex [GO:0035632]; mitochondrion [GO:0005739]; nuclear matrix [GO:0016363]; nucleus [GO:0005634]; plasma membrane [GO…	amide binding [GO:0033218]; identical protein binding [GO:0042802]; nuclear estrogen receptor binding [GO:0030331]; protein heterodimerization activity [GO:0046982]; protein homodimerization activity [GO:0042803]; sphingolipid binding [GO:0046625]	10|13|10|12	45	11.25	4	0|0|6|4|3|3|0|0|0|0|1|0|2|1|3|2|2|0|2|1|1|1|0|0|0|0|0|0|0|0|0|0|0|0|0|0|0|0|0|0|0|0|0|1	0.99	1	0.99	1	0.99	4.3	15	0	Helka	243 / 716	9	45	243	TRUE	IntAct	pubmed:35140242|imex:IM-28767	intact-miscore:0.27
MYC	BioID	P01106	Q9BYE7	Prey	P01106_Q9BYE7	PCGF6	Polycomb group RING finger protein 6 (Mel18 and Bmi1-like RING finger) (RING finger protein 134)	PCGF6 MBLR RNF134	350	chromatin remodeling [GO:0006338]; negative regulation of DNA-templated transcription [GO:0045892]; negative regulation of transcription by RNA polymerase II [GO:0000122]; regulation of transcription by RNA polymerase II [GO:0006357]	nucleoplasm [GO:0005654]; nucleus [GO:0005634]; PcG protein complex [GO:0031519]; PRC1 complex [GO:0035102]	metal ion binding [GO:0046872]	4|5|6|5	20	5	4	2|0|1|1|1|1|0|0|0|0|1|1|0|0|0|0|0|0|0|0|0|0|0|0|0|0|3|2|0|0|1|2|0|0|1|0|0|1|0|0|0|0|0|0	0.98	1	0.98	1	0.98	2.74	12.22	0.01	Helka	11 / 716	1.8	4	11	TRUE	IntAct	pubmed:35140242|imex:IM-28767	intact-miscore:0.27
MYC	BioID	P01106	Q9H0E9	Prey	P01106_Q9H0E9	BRD8	Bromodomain-containing protein 8 (Skeletal muscle abundant protein) (Skeletal muscle abundant protein 2) (Thyroid hormone receptor coactivating protein of 120 kDa) (TrCP120) (p120)	BRD8 SMAP SMAP2	1235	cell surface receptor signaling pathway [GO:0007166]; cellular response to thyroid hormone stimulus [GO:0097067]; chromatin organization [GO:0006325]; positive regulation of DNA-templated transcription [GO:0045893]; positive regulation of double-strand break repair via homologous recombination [GO:1905168]; positive regulation of transcription by RNA polymerase II [GO:0045944]; regulation of apop…	mitochondrion [GO:0005739]; NuA4 histone acetyltransferase complex [GO:0035267]; nucleoplasm [GO:0005654]; nucleosome [GO:0000786]; nucleus [GO:0005634]; Swr1 complex [GO:0000812]	nuclear receptor coactivator activity [GO:0030374]; nuclear thyroid hormone receptor binding [GO:0046966]	52|59|53|52	216	54	4	2|4|1|2|4|3|2|1|3|2|2|0|0|0|1|1|1|0|0|0|0|0|0|0|0|0|4|5|1|0|2|4|0|0|0|0|0|1|0|0|2|3|2|0	1	1	1	1	1	33.28	44.83	0	Helka	18 / 716	1.2	2	18	TRUE	IntAct	pubmed:35140242|imex:IM-28767	intact-miscore:0.27
MYC	BioID	P01106	Q9H2F5	Prey	P01106_Q9H2F5	EPC1	Enhancer of polycomb homolog 1	EPC1	836	DNA-templated transcription [GO:0006351]; double-strand break repair via homologous recombination [GO:0000724]; negative regulation of DNA-templated transcription [GO:0045892]; negative regulation of gene expression, epigenetic [GO:0045814]; negative regulation of transcription by RNA polymerase II [GO:0000122]; positive regulation of DNA-templated transcription [GO:0045893]; positive regulation …	cytoplasm [GO:0005737]; NuA4 histone acetyltransferase complex [GO:0035267]; nuclear body [GO:0016604]; nuclear membrane [GO:0031965]; nucleolus [GO:0005730]; nucleoplasm [GO:0005654]; nucleosome [GO:0000786]; nucleus [GO:0005634]; Piccolo NuA4 histone acetyltransferase complex [GO:0032777]; site of double-strand break [GO:0035861]	chromatin-protein adaptor activity [GO:0140463]; enzyme-substrate adaptor activity [GO:0140767]	50|44|46|49	189	47.25	4	0|0|1|0|1|0|0|0|0|0|0|0|0|0|0|0|0|0|1|1|0|0|0|1|0|0|0|0|0|0|0|0|0|0|0|0|0|0|0|0|1|4|0|0	1	1	1	1	1	26.9	207.9	0	Helka	3 / 716	1.3	2	3	TRUE	IntAct	pubmed:21150319|imex:IM-16995|pubmed:35140242|imex:IM-28767	intact-miscore:0.48|intact-miscore:0.48
MYC	BioID	P01106	Q9H7Z6	Prey	P01106_Q9H7Z6	KAT8	Histone acetyltransferase KAT8 (EC 2.3.1.48) (Lysine acetyltransferase 8) (MOZ, YBF2/SAS3, SAS2 and TIP60 protein 1) (MYST-1) (hMOF)	KAT8 MOF MYST1 PP7073	458	myeloid cell differentiation [GO:0030099]; negative regulation of DNA-templated transcription [GO:0045892]; neurogenesis [GO:0022008]; positive regulation of DNA-templated transcription [GO:0045893]; positive regulation of histone H3-K4 methylation [GO:0051571]; positive regulation of transcription by RNA polymerase II [GO:0045944]; regulation of autophagy [GO:0010506]; regulation of dosage compe…	histone acetyltransferase complex [GO:0000123]; kinetochore [GO:0000776]; MLL1 complex [GO:0071339]; MSL complex [GO:0072487]; NSL complex [GO:0044545]; nuclear matrix [GO:0016363]; nucleoplasm [GO:0005654]; nucleus [GO:0005634]	enzyme binding [GO:0019899]; histone H4K16 acetyltransferase activity [GO:0046972]; metal ion binding [GO:0046872]; RNA polymerase II-specific DNA-binding transcription factor binding [GO:0061629]; transcription coactivator activity [GO:0003713]; transcription coregulator activity [GO:0003712]	3|3|6|4	16	4	4	1|1|0|0|0|0|2|0|0|0|0|0|0|0|0|0|0|0|0|0|0|0|0|0|0|0|1|1|0|0|0|0|0|0|0|0|0|0|0|0|0|0|0|0	0.99	1	0.99	1	0.99	4.03	29.33	0	Helka	4 / 716	1.3	2	4	TRUE	IntAct	pubmed:35140242|imex:IM-28767	intact-miscore:0.27
MYC	BioID	P01106	Q9H8E8	Prey	P01106_Q9H8E8	KAT14	Cysteine-rich protein 2-binding protein (CSRP2-binding protein) (ADA2A-containing complex subunit 2) (ATAC2) (CRP2-binding partner) (CRP2BP) (Lysine acetyltransferase 14)	KAT14 CSRP2BP	782	negative regulation of transcription by RNA polymerase II [GO:0000122]; regulation of cell cycle [GO:0051726]; regulation of cell division [GO:0051302]; regulation of DNA-templated transcription [GO:0006355]; regulation of embryonic development [GO:0045995]; regulation of transcription by RNA polymerase II [GO:0006357]; regulation of tubulin deacetylation [GO:0090043]	ATAC complex [GO:0140672]; cytoplasm [GO:0005737]; mitotic spindle [GO:0072686]; nucleoplasm [GO:0005654]; nucleus [GO:0005634]	histone acetyltransferase activity [GO:0004402]; LIM domain binding [GO:0030274]	23|24|27|23	97	24.25	4	5|1|13|6|15|4|4|0|6|1|3|1|3|1|3|2|4|0|0|1|1|2|0|1|0|1|7|2|2|1|6|6|0|3|0|1|2|5|0|0|10|8|6|4	0.99	0.99	0.99	0.99	0.99	4	7.57	0	Helka	7 / 716	1.3	3	7	TRUE	IntAct	pubmed:35140242|imex:IM-28767	intact-miscore:0.27
MYC	BioID	P01106	Q9H9L4	Prey	P01106_Q9H9L4	KANSL2	KAT8 regulatory NSL complex subunit 2 (NSL complex protein NSL2) (Non-specific lethal 2 homolog)	KANSL2 C12orf41 NSL2	492	chromatin organization [GO:0006325]; positive regulation of DNA-templated transcription [GO:0045893]; positive regulation of histone H3-K4 methylation [GO:0051571]; regulation of dosage compensation by inactivation of X chromosome [GO:1900095]	actin cytoskeleton [GO:0015629]; cytosol [GO:0005829]; histone acetyltransferase complex [GO:0000123]; NSL complex [GO:0044545]; nucleoplasm [GO:0005654]; plasma membrane [GO:0005886]		6|6|6|3	21	5.25	4	0|1|0|1|1|0|0|0|0|0|0|1|0|0|0|0|0|0|0|0|0|0|0|0|0|0|0|1|0|0|0|0|0|0|0|0|0|0|0|0|1|0|0|0	1	1	1	1	1	4	38.5	0	Helka	1 / 716	1	1	1	TRUE	IntAct	pubmed:35140242|imex:IM-28767	intact-miscore:0.27
MYC	BioID	P01106	Q9HAF1	Prey	P01106_Q9HAF1	MEAF6	Chromatin modification-related protein MEAF6 (MYST/Esa1-associated factor 6) (Esa1-associated factor 6 homolog) (Protein EAF6 homolog) (hEAF6) (Sarcoma antigen NY-SAR-91)	MEAF6 C1orf149 CENP-28 EAF6	191	chromatin remodeling [GO:0006338]; positive regulation of DNA-templated transcription [GO:0045893]; positive regulation of double-strand break repair via homologous recombination [GO:1905168]; regulation of apoptotic process [GO:0042981]; regulation of cell cycle [GO:0051726]; regulation of cell growth [GO:0001558]; regulation of developmental process [GO:0050793]; regulation of DNA biosynthetic …	histone acetyltransferase complex [GO:0000123]; kinetochore [GO:0000776]; MOZ/MORF histone acetyltransferase complex [GO:0070776]; NuA4 histone acetyltransferase complex [GO:0035267]; nucleolus [GO:0005730]; nucleoplasm [GO:0005654]; nucleosome [GO:0000786]; nucleus [GO:0005634]		10|10|11|12	43	10.75	4	0|0|0|0|0|0|0|0|0|0|0|0|0|0|0|0|0|0|0|0|0|0|0|0|0|0|0|0|0|0|0|0|0|0|0|0|0|0|0|0|0|0|0|0	1	1	1	1	1	15.95	107.5	0	Helka	12 / 716	1.6	3	12	TRUE	IntAct	pubmed:35140242|imex:IM-28767	intact-miscore:0.27
MYC	BioID	P01106	Q9HAV7	Prey	P01106_Q9HAV7	GRPEL1	GrpE protein homolog 1, mitochondrial (HMGE) (Mt-GrpE#1)	GRPEL1 GREPEL1	217	intracellular protein transport [GO:0006886]; protein folding [GO:0006457]; protein import into mitochondrial matrix [GO:0030150]	mitochondrial inner membrane [GO:0005743]; mitochondrial matrix [GO:0005759]; mitochondrion [GO:0005739]; nucleoplasm [GO:0005654]; PAM complex, Tim23 associated import motor [GO:0001405]; TIM23 mitochondrial import inner membrane translocase complex [GO:0005744]	adenyl-nucleotide exchange factor activity [GO:0000774]; identical protein binding [GO:0042802]; protein homodimerization activity [GO:0042803]; protein-folding chaperone binding [GO:0051087]; unfolded protein binding [GO:0051082]	4|3|3|3	13	3.25	4	0|0|1|1|3|1|1|0|0|0|0|0|0|1|0|0|0|0|0|1|0|1|1|0|0|0|0|0|0|0|0|0|0|1|0|0|0|0|0|0|0|0|0|1	0.93	0.98	0.93	0.98	0.93	2.35	11	0.02	Helka	125 / 716	3.2	24	125	TRUE	IntAct	pubmed:35140242|imex:IM-28767	intact-miscore:0.27
MYC	BioID	P01106	Q9HBM6	Prey	P01106_Q9HBM6	TAF9B	Transcription initiation factor TFIID subunit 9B (Neuronal cell death-related protein 7) (DN-7) (Transcription initiation factor TFIID subunit 9-like) (Transcription-associated factor TAFII31L)	TAF9B TAF9L	251	DNA-templated transcription initiation [GO:0006352]; negative regulation of apoptotic process [GO:0043066]; negative regulation of intrinsic apoptotic signaling pathway in response to DNA damage by p53 class mediator [GO:1902166]; negative regulation of transcription by RNA polymerase II [GO:0000122]; positive regulation of cell growth [GO:0030307]; protein stabilization [GO:0050821]	nucleoplasm [GO:0005654]; transcription factor TFIID complex [GO:0005669]; transcription factor TFTC complex [GO:0033276]	protein heterodimerization activity [GO:0046982]; RNA polymerase II general transcription initiation factor activity [GO:0016251]; transcription corepressor activity [GO:0003714]	16|16|15|17	64	16	4	5|4|4|2|6|3|2|2|3|3|0|0|0|0|0|0|0|0|0|0|0|0|0|0|0|0|4|4|0|0|1|3|0|0|0|0|0|1|0|0|4|6|1|2	1	1	1	1	1	4.99	11.73	0	Helka	98 / 716	3.7	21	98	TRUE	IntAct	pubmed:35140242|imex:IM-28767	intact-miscore:0.27
MYC	BioID	P01106	Q9NPA3	Prey	P01106_Q9NPA3	MID1IP1	Mid1-interacting protein 1 (Gastrulation-specific G12-like protein) (Mid1-interacting G12-like protein) (Protein STRAIT11499) (Spot 14-related protein) (S14R) (Spot 14-R)	MID1IP1 MIG12	183	lipid metabolic process [GO:0006629]; negative regulation of microtubule depolymerization [GO:0007026]; positive regulation of fatty acid biosynthetic process [GO:0045723]; positive regulation of ligase activity [GO:0051351]; protein polymerization [GO:0051258]; regulation of lipid biosynthetic process [GO:0046890]	cytosol [GO:0005829]; microtubule [GO:0005874]; microtubule cytoskeleton [GO:0015630]; nucleus [GO:0005634]	identical protein binding [GO:0042802]	10|8|8|7	33	8.25	4	0|0|0|0|0|2|0|0|0|0|0|0|0|0|1|0|0|0|1|2|0|0|0|0|0|0|0|0|0|0|0|0|0|0|1|0|0|0|3|4|1|0|1|2	0.99	1	0.99	1	0.99	4.22	20.17	0	Helka	1 / 716	1	1	1	TRUE	IntAct	pubmed:35140242|imex:IM-28767	intact-miscore:0.27
MYC	BioID	P01106	Q9NPF5	Prey	P01106_Q9NPF5	DMAP1	DNA methyltransferase 1-associated protein 1 (DNMAP1) (DNMT1-associated protein 1)	DMAP1 KIAA1425	467	chromatin remodeling [GO:0006338]; DNA repair [GO:0006281]; negative regulation of DNA-templated transcription [GO:0045892]; negative regulation of transcription by RNA polymerase II [GO:0000122]; positive regulation of DNA-templated transcription [GO:0045893]; positive regulation of double-strand break repair via homologous recombination [GO:1905168]; positive regulation of protein import into n…	cytoplasm [GO:0005737]; cytosol [GO:0005829]; NuA4 histone acetyltransferase complex [GO:0035267]; nucleoplasm [GO:0005654]; nucleosome [GO:0000786]; nucleus [GO:0005634]; replication fork [GO:0005657]; Swr1 complex [GO:0000812]	RNA polymerase II-specific DNA-binding transcription factor binding [GO:0061629]; transcription corepressor activity [GO:0003714]	39|41|44|44	168	42	4	4|6|6|2|4|5|5|1|4|4|2|2|2|1|2|1|4|1|1|2|0|2|2|2|0|1|2|5|2|4|3|6|1|2|2|1|0|0|0|0|11|9|2|3	1	1	1	1	1	16.33	15.53	0	Helka	45 / 716	1.4	4	45	TRUE	IntAct	pubmed:35140242|imex:IM-28767	intact-miscore:0.27
MYC	BioID	P01106	Q9NPI1	Prey	P01106_Q9NPI1	BRD7	Bromodomain-containing protein 7 (75 kDa bromodomain protein) (Protein CELTIX-1)	BRD7 BP75 CELTIX1	651	cell cycle [GO:0007049]; chromatin remodeling [GO:0006338]; negative regulation of DNA-templated transcription [GO:0045892]; negative regulation of G1/S transition of mitotic cell cycle [GO:2000134]; positive regulation of cell differentiation [GO:0045597]; positive regulation of double-strand break repair [GO:2000781]; positive regulation of myoblast differentiation [GO:0045663]; positive regula…	chromatin [GO:0000785]; cytoplasm [GO:0005737]; cytosol [GO:0005829]; kinetochore [GO:0000776]; nuclear matrix [GO:0016363]; nucleoplasm [GO:0005654]; nucleus [GO:0005634]; RSC-type complex [GO:0016586]	histone binding [GO:0042393]; lysine-acetylated histone binding [GO:0070577]; p53 binding [GO:0002039]; transcription cis-regulatory region binding [GO:0000976]; transcription coactivator activity [GO:0003713]; transcription corepressor activity [GO:0003714]	3|10|5|6	24	6	4	0|0|1|1|1|0|1|0|0|0|0|0|0|0|0|0|0|0|0|0|0|0|0|0|0|0|0|1|0|0|0|3|0|0|0|1|0|0|0|0|1|2|0|2	0.96	1	0.96	1	0.96	1.84	18.86	0.01	Helka	30 / 716	2.7	8	30	TRUE	IntAct	pubmed:35140242|imex:IM-28767	intact-miscore:0.27
MYC	BioID	P01106	Q9NQP4	Prey	P01106_Q9NQP4	PFDN4	Prefoldin subunit 4 (Protein C-1)	PFDN4 PFD4	134	chaperone-mediated protein folding [GO:0061077]; negative regulation of amyloid fibril formation [GO:1905907]; protein folding [GO:0006457]	cytoplasm [GO:0005737]; cytosol [GO:0005829]; mitochondrion [GO:0005739]; nucleus [GO:0005634]; prefoldin complex [GO:0016272]	amyloid-beta binding [GO:0001540]; protein-folding chaperone binding [GO:0051087]; unfolded protein binding [GO:0051082]	2|2|2|2	8	2	4	0|0|0|0|0|0|0|0|0|0|0|0|0|0|1|1|0|0|0|0|0|0|0|0|0|0|0|0|1|1|0|0|2|2|0|0|0|0|0|0|0|0|0|1	0.77	0.77	0.77	0.77	0.77	1.18	9.78	0.06	Helka	42 / 716	1.3	2	42	TRUE	IntAct	pubmed:35140242|imex:IM-28767	intact-miscore:0.27
MYC	BioID	P01106	Q9NS73	Prey	P01106_Q9NS73	MBIP	MAP3K12-binding inhibitory protein 1 (MAPK upstream kinase-binding inhibitory protein) (MUK-binding inhibitory protein)	MBIP BM-015	344	negative regulation of transcription by RNA polymerase II [GO:0000122]; positive regulation of gene expression [GO:0010628]; positive regulation of JNK cascade [GO:0046330]; regulation of cell cycle [GO:0051726]; regulation of cell division [GO:0051302]; regulation of DNA-templated transcription [GO:0006355]; regulation of embryonic development [GO:0045995]; regulation of transcription by RNA pol…	ATAC complex [GO:0140672]; cytosol [GO:0005829]; mitotic spindle [GO:0072686]; nucleolus [GO:0005730]; nucleoplasm [GO:0005654]	identical protein binding [GO:0042802]; protein kinase inhibitor activity [GO:0004860]	22|18|17|18	75	18.75	4	3|3|9|3|8|3|3|1|3|1|2|4|3|1|2|1|3|0|1|0|1|2|0|1|0|0|3|6|0|0|2|4|0|0|0|0|0|0|0|0|4|0|1|1	1	1	1	1	1	5.24	10.44	0	Helka	4 / 716	1	1	4	TRUE	IntAct	pubmed:35140242|imex:IM-28767	intact-miscore:0.27
MYC	BioID	P01106	Q9NV56	Prey	P01106_Q9NV56	MRGBP	MRG/MORF4L-binding protein (MRG-binding protein) (Up-regulated in colon cancer 4) (Urcc4)	MRGBP C20orf20	204	chromatin organization [GO:0006325]; positive regulation of DNA-templated transcription [GO:0045893]; positive regulation of double-strand break repair via homologous recombination [GO:1905168]; regulation of apoptotic process [GO:0042981]; regulation of cell cycle [GO:0051726]; regulation of double-strand break repair [GO:2000779]; regulation of transcription by RNA polymerase II [GO:0006357]	NuA4 histone acetyltransferase complex [GO:0035267]; nucleoplasm [GO:0005654]; nucleosome [GO:0000786]		6|7|7|7	27	6.75	4	1|1|3|1|1|1|1|1|2|1|0|0|0|0|0|0|0|0|0|0|0|0|0|0|0|0|0|0|0|0|1|0|0|0|0|0|0|0|0|0|0|0|0|0	1	1	1	1	1	6.32	21.21	0	Helka	22 / 716	1.1	2	22	TRUE	IntAct	pubmed:21150319|imex:IM-16995|pubmed:35140242|imex:IM-28767	intact-miscore:0.48|intact-miscore:0.48
MYC	BioID	P01106	Q9NXR8	Prey	P01106_Q9NXR8	ING3	Inhibitor of growth protein 3 (p47ING3)	ING3 HSPC301	418	positive regulation of DNA-templated transcription [GO:0045893]; positive regulation of double-strand break repair via homologous recombination [GO:1905168]; positive regulation of transcription by RNA polymerase II [GO:0045944]; regulation of apoptotic process [GO:0042981]; regulation of cell cycle [GO:0051726]; regulation of DNA-templated transcription [GO:0006355]; regulation of double-strand …	NuA4 histone acetyltransferase complex [GO:0035267]; nucleoplasm [GO:0005654]; nucleosome [GO:0000786]; nucleus [GO:0005634]; Piccolo NuA4 histone acetyltransferase complex [GO:0032777]; Swr1 complex [GO:0000812]	histone H4K12 acetyltransferase activity [GO:0043997]; histone H4K16 acetyltransferase activity [GO:0046972]; histone H4K5 acetyltransferase activity [GO:0043995]; histone H4K8 acetyltransferase activity [GO:0043996]; metal ion binding [GO:0046872]; methylated histone binding [GO:0035064]	30|28|27|26	111	27.75	4	4|4|2|1|2|0|4|0|4|0|0|0|0|0|0|0|0|0|0|0|0|0|0|0|0|0|0|0|0|0|0|0|0|0|0|0|0|0|0|0|1|1|1|1	1	1	1	1	1	11.61	48.84	0	Helka	1 / 716	1	1	1	TRUE	IntAct	pubmed:35140242|imex:IM-28767	intact-miscore:0.27
MYC	BioID	P01106	Q9P0U4	Prey	P01106_Q9P0U4	CXXC1	CXXC-type zinc finger protein 1 (CpG-binding protein) (PHD finger and CXXC domain-containing protein 1)	CXXC1 CFP1 CGBP PCCX1 PHF18	656	positive regulation of DNA-templated transcription [GO:0045893]; regulation of DNA-templated transcription [GO:0006355]	cytosol [GO:0005829]; histone methyltransferase complex [GO:0035097]; nuclear matrix [GO:0016363]; nuclear speck [GO:0016607]; nucleoplasm [GO:0005654]; nucleus [GO:0005634]; Set1C/COMPASS complex [GO:0048188]	cis-regulatory region sequence-specific DNA binding [GO:0000987]; methylated histone binding [GO:0035064]; unmethylated CpG binding [GO:0045322]; zinc ion binding [GO:0008270]	15|16|13|16	60	15	4	5|3|3|1|7|1|4|0|5|0|1|0|0|1|0|0|0|0|0|0|0|0|0|0|0|0|0|0|0|0|4|2|0|0|0|0|0|0|0|0|1|0|0|0	0.99	0.99	0.99	0.99	0.99	4.28	17.37	0	Helka	6 / 716	1.7	3	6	TRUE	IntAct	pubmed:35140242|imex:IM-28767	intact-miscore:0.27
MYC	BioID	P01106	Q9P2D1	Prey	P01106_Q9P2D1	CHD7	Chromodomain-helicase-DNA-binding protein 7 (CHD-7) (EC 3.6.4.12) (ATP-dependent helicase CHD7)	CHD7 KIAA1416	2997	adult heart development [GO:0007512]; adult walking behavior [GO:0007628]; aorta morphogenesis [GO:0035909]; atrioventricular canal development [GO:0036302]; blood circulation [GO:0008015]; blood vessel remodeling [GO:0001974]; cardiac septum morphogenesis [GO:0060411]; central nervous system development [GO:0007417]; chordate embryonic development [GO:0043009]; chromatin remodeling [GO:0006338];…	chromatin [GO:0000785]; nucleolus [GO:0005730]; nucleoplasm [GO:0005654]; nucleus [GO:0005634]	ATP binding [GO:0005524]; ATP hydrolysis activity [GO:0016887]; ATP-dependent chromatin remodeler activity [GO:0140658]; chromatin binding [GO:0003682]; DNA binding [GO:0003677]; helicase activity [GO:0004386]; histone binding [GO:0042393]; promoter-specific chromatin binding [GO:1990841]; RNA polymerase II cis-regulatory region sequence-specific DNA binding [GO:0000978]	14|14|12|11	51	12.75	4	0|10|0|0|0|0|14|0|10|0|0|0|0|0|0|0|0|0|0|0|0|3|0|0|0|0|11|14|0|0|5|7|0|0|0|0|0|0|0|0|7|4|0|0	0.87	0.9	0.87	0.9	0.87	1.58	6.6	0.03	Helka	121 / 716	9.1	67	121	TRUE	IntAct	pubmed:35140242|imex:IM-28767	intact-miscore:0.27
MYC	BioID	P01106	Q9P2N6	Prey	P01106_Q9P2N6	KANSL3	KAT8 regulatory NSL complex subunit 3 (NSL complex protein NSL3) (Non-specific lethal 3 homolog) (Serum inhibited-related protein) (Testis development protein PRTD)	KANSL3 KIAA1310 NSL3 PRTD SI1	904	chromatin organization [GO:0006325]; positive regulation of DNA-templated transcription [GO:0045893]; positive regulation of histone H3-K4 methylation [GO:0051571]; positive regulation of transcription by RNA polymerase II [GO:0045944]; regulation of dosage compensation by inactivation of X chromosome [GO:1900095]	histone acetyltransferase complex [GO:0000123]; intracellular membrane-bounded organelle [GO:0043231]; NSL complex [GO:0044545]; nucleoplasm [GO:0005654]		16|16|14|17	63	15.75	4	0|1|0|1|1|2|1|1|1|0|0|0|0|0|0|0|0|0|0|0|0|0|0|0|0|0|1|1|0|1|0|2|0|0|0|0|0|0|0|0|0|1|0|0	1	1	1	1	1	18.74	49.5	0	Helka	15 / 716	2.5	7	15	TRUE	IntAct	pubmed:35140242|imex:IM-28767	intact-miscore:0.27
MYC	BioID	P01106	Q9UBL3	Prey	P01106_Q9UBL3	ASH2L	Set1/Ash2 histone methyltransferase complex subunit ASH2 (ASH2-like protein)	ASH2L ASH2L1	628	DNA damage response [GO:0006974]; hemopoiesis [GO:0030097]; positive regulation of cell population proliferation [GO:0008284]; positive regulation of transcription by RNA polymerase II [GO:0045944]; response to estrogen [GO:0043627]; transcription initiation-coupled chromatin remodeling [GO:0045815]	euchromatin [GO:0000791]; histone methyltransferase complex [GO:0035097]; MLL1 complex [GO:0071339]; MLL1/2 complex [GO:0044665]; MLL3/4 complex [GO:0044666]; nucleoplasm [GO:0005654]; nucleus [GO:0005634]; Set1C/COMPASS complex [GO:0048188]	beta-catenin binding [GO:0008013]; metal ion binding [GO:0046872]; transcription cis-regulatory region binding [GO:0000976]	21|19|23|20	83	20.75	4	11|12|14|5|10|5|13|4|13|8|6|3|4|2|6|0|8|0|2|3|4|3|0|0|0|2|3|3|2|0|5|6|0|2|1|1|2|4|0|0|9|9|3|3	0.92	0.96	0.92	0.96	0.92	2.07	4.78	0.02	Helka	43 / 716	1.8	5	43	TRUE	IntAct	pubmed:35140242|imex:IM-28767	intact-miscore:0.27
MYC	BioID	P01106	Q9UBU8	Prey	P01106_Q9UBU8	MORF4L1	Mortality factor 4-like protein 1 (MORF-related gene 15 protein) (Protein MSL3-1) (Transcription factor-like protein MRG15)	MORF4L1 MRG15 FWP006 HSPC008 HSPC061 PP368	362	chromatin organization [GO:0006325]; double-strand break repair via homologous recombination [GO:0000724]; fibroblast proliferation [GO:0048144]; positive regulation of DNA-templated transcription [GO:0045893]; positive regulation of double-strand break repair via homologous recombination [GO:1905168]; regulation of apoptotic process [GO:0042981]; regulation of cell cycle [GO:0051726]; regulation…	NuA4 histone acetyltransferase complex [GO:0035267]; nuclear speck [GO:0016607]; nucleoplasm [GO:0005654]; nucleosome [GO:0000786]; Sin3 complex [GO:0016580]	chromatin binding [GO:0003682]	15|15|15|15	60	15	4	1|2|0|0|0|0|1|1|2|2|0|0|0|0|0|0|0|0|0|0|0|0|0|0|0|0|0|0|0|0|0|0|0|0|0|0|0|0|0|0|0|0|0|1	1	1	1	1	1	16.54	66	0	Helka	26 / 716	1.4	3	26	TRUE	IntAct	pubmed:35140242|imex:IM-28767	intact-miscore:0.27
MYC	BioID	P01106	Q9ULK2	Prey	P01106_Q9ULK2	ATXN7L1	Ataxin-7-like protein 1 (Ataxin-7-like protein 4)	ATXN7L1 ATXN7L4 KIAA1218	861				8|5|5|7	25	6.25	4	0|0|0|0|0|0|0|0|0|0|0|0|0|0|0|0|0|0|0|0|0|0|0|0|0|0|0|0|0|0|0|0|0|0|0|0|0|0|0|0|0|0|0|0	1	1	1	1	1	8.02	62.5	0	Helka	/ 716	0		0	TRUE	IntAct	pubmed:35140242|imex:IM-28767	intact-miscore:0.27
MYC	BioID	P01106	Q9ULM3	Prey	P01106_Q9ULM3	YEATS2	YEATS domain-containing protein 2	YEATS2 KIAA1197	1422	chromatin remodeling [GO:0006338]; negative regulation of transcription by RNA polymerase II [GO:0000122]; regulation of cell cycle [GO:0051726]; regulation of cell division [GO:0051302]; regulation of DNA-templated transcription [GO:0006355]; regulation of embryonic development [GO:0045995]; regulation of transcription by RNA polymerase II [GO:0006357]; regulation of tubulin deacetylation [GO:00…	ATAC complex [GO:0140672]; mitotic spindle [GO:0072686]; NuA4 histone acetyltransferase complex [GO:0035267]; nucleoplasm [GO:0005654]	histone binding [GO:0042393]; histone reader activity [GO:0140566]; modification-dependent protein binding [GO:0140030]; TBP-class protein binding [GO:0017025]; transcription corepressor activity [GO:0003714]	82|71|72|69	294	73.5	4	30|27|41|28|50|23|25|16|27|18|25|15|11|6|19|13|23|7|11|13|14|13|2|4|7|13|27|25|13|12|15|24|7|12|14|14|10|20|0|0|29|31|8|12	0.97	1	0.97	1	0.97	2.86	4.29	0.01	Helka	97 / 716	10.9	61	97	TRUE	IntAct	pubmed:35140242|imex:IM-28767	intact-miscore:0.27
MYC	BioID	P01106	Q9UMN6	Prey	P01106_Q9UMN6	KMT2B	Histone-lysine N-methyltransferase 2B (Lysine N-methyltransferase 2B) (EC 2.1.1.364) (Myeloid/lymphoid or mixed-lineage leukemia protein 4) (Trithorax homolog 2) (WW domain-binding protein 7) (WBP-7)	KMT2B HRX2 KIAA0304 MLL2 MLL4 TRX2 WBP7	2715	methylation [GO:0032259]; positive regulation of DNA-templated transcription [GO:0045893]	histone methyltransferase complex [GO:0035097]; MLL1/2 complex [GO:0044665]; nucleoplasm [GO:0005654]; nucleus [GO:0005634]	histone H3K4 methyltransferase activity [GO:0042800]; histone H3K4 monomethyltransferase activity [GO:0140945]; histone H3K4 trimethyltransferase activity [GO:0140999]; unmethylated CpG binding [GO:0045322]; zinc ion binding [GO:0008270]	10|8|8|9	35	8.75	4	9|11|1|1|4|4|7|2|6|6|0|0|0|0|0|0|0|0|0|0|0|0|0|0|0|1|5|6|0|0|3|7|0|0|0|0|0|0|0|0|0|0|0|0	0.78	0.84	0.78	0.84	0.78	1.08	5.27	0.05	Helka	74 / 716	4.2	14	74	TRUE	IntAct	pubmed:35140242|imex:IM-28767	intact-miscore:0.27
MYC	BioID	P01106	Q9UPN9	Prey	P01106_Q9UPN9	TRIM33	E3 ubiquitin-protein ligase TRIM33 (EC 2.3.2.27) (Ectodermin homolog) (RET-fused gene 7 protein) (Protein Rfg7) (RING-type E3 ubiquitin transferase TRIM33) (Transcription intermediary factor 1-gamma) (TIF1-gamma) (Tripartite motif-containing protein 33)	TRIM33 KIAA1113 RFG7 TIF1G	1127	negative regulation of BMP signaling pathway [GO:0030514]; negative regulation of DNA-templated transcription [GO:0045892]; negative regulation of transcription by RNA polymerase II [GO:0000122]; protein ubiquitination [GO:0016567]; regulation of transforming growth factor beta receptor signaling pathway [GO:0017015]	nucleoplasm [GO:0005654]; nucleus [GO:0005634]	co-SMAD binding [GO:0070410]; DNA binding [GO:0003677]; R-SMAD binding [GO:0070412]; ubiquitin-protein transferase activity [GO:0004842]; zinc ion binding [GO:0008270]	7|5|4|6	22	5.5	4	2|5|5|2|5|3|1|0|4|2|0|0|0|0|0|0|0|0|0|0|0|0|0|0|0|0|4|0|0|0|1|2|0|0|0|0|0|0|0|0|0|0|1|2	0.77	0.89	0.77	0.89	0.77	0.5	6.21	0.06	Helka	69 / 716	2.2	6	69	TRUE	IntAct	pubmed:35140242|imex:IM-28767	intact-miscore:0.27
MYC	BioID	P01106	Q9UPT9	Prey	P01106_Q9UPT9	USP22	Ubiquitin carboxyl-terminal hydrolase 22 (EC 3.4.19.12) (Deubiquitinating enzyme 22) (Ubiquitin thioesterase 22) (Ubiquitin-specific-processing protease 22)	USP22 KIAA1063 USP3L	525	cell cycle [GO:0007049]; embryo development ending in birth or egg hatching [GO:0009792]; positive regulation of DNA-templated transcription [GO:0045893]; positive regulation of mitotic cell cycle [GO:0045931]; protein deubiquitination [GO:0016579]; regulation of DNA repair [GO:0006282]; regulation of RNA splicing [GO:0043484]; regulation of transcription by RNA polymerase II [GO:0006357]	nucleoplasm [GO:0005654]; SAGA complex [GO:0000124]; transcription factor TFTC complex [GO:0033276]	cysteine-type deubiquitinase activity [GO:0004843]; enzyme binding [GO:0019899]; histone H2B deubiquitinase activity [GO:0140936]; nuclear receptor coactivator activity [GO:0030374]; transcription coactivator activity [GO:0003713]; zinc ion binding [GO:0008270]	13|17|19|23	72	18	4	2|4|0|0|0|0|0|2|1|0|0|0|0|0|0|0|0|0|0|0|0|0|0|0|0|0|1|1|0|0|0|0|0|0|0|0|0|0|0|0|0|0|0|0	1	1	1	1	1	8.25	72	0	Helka	45 / 716	1.3	3	45	TRUE	IntAct	pubmed:35140242|imex:IM-28767	intact-miscore:0.27
MYC	BioID	P01106	Q9Y230	Prey	P01106_Q9Y230	RUVBL2	RuvB-like 2 (EC 3.6.4.12) (48 kDa TATA box-binding protein-interacting protein) (48 kDa TBP-interacting protein) (51 kDa erythrocyte cytosolic protein) (ECP-51) (INO80 complex subunit J) (Repressing pontin 52) (Reptin 52) (TIP49b) (TIP60-associated protein 54-beta) (TAP54-beta)	RUVBL2 INO80J TIP48 TIP49B CGI-46	463	box C/D snoRNP assembly [GO:0000492]; cellular response to estradiol stimulus [GO:0071392]; cellular response to UV [GO:0034644]; chromatin remodeling [GO:0006338]; DNA recombination [GO:0006310]; DNA repair [GO:0006281]; establishment of protein localization to chromatin [GO:0071169]; negative regulation of canonical Wnt signaling pathway [GO:0090090]; positive regulation of DNA repair [GO:00457…	centrosome [GO:0005813]; cytoplasm [GO:0005737]; cytosol [GO:0005829]; dynein axonemal particle [GO:0120293]; euchromatin [GO:0000791]; extracellular exosome [GO:0070062]; Ino80 complex [GO:0031011]; membrane [GO:0016020]; MLL1 complex [GO:0071339]; NuA4 histone acetyltransferase complex [GO:0035267]; nuclear matrix [GO:0016363]; nucleoplasm [GO:0005654]; nucleosome [GO:0000786]; nucleus [GO:0005…	ADP binding [GO:0043531]; ATP binding [GO:0005524]; ATP hydrolysis activity [GO:0016887]; ATPase binding [GO:0051117]; beta-catenin binding [GO:0008013]; chromatin DNA binding [GO:0031490]; DNA helicase activity [GO:0003678]; identical protein binding [GO:0042802]; promoter-enhancer loop anchoring activity [GO:0140585]; protein homodimerization activity [GO:0042803]; RNA polymerase II cis-regulat…	97|92|103|106	398	99.5	4	37|42|38|23|46|25|37|18|40|25|27|20|22|16|22|22|26|16|18|14|15|20|37|31|8|9|26|21|13|14|19|20|22|20|17|16|49|41|34|25|34|35|16|18	1	1	1	1	1	4.09	4	0	Helka	310 / 716	12.9	96	310	TRUE	IntAct	pubmed:17314511|pubmed:35140242|imex:IM-28767	intact-miscore:0.48|intact-miscore:0.48
MYC	BioID	P01106	Q9Y3C1	Prey	P01106_Q9Y3C1	NOP16	Nucleolar protein 16 (HBV pre-S2 trans-regulated protein 3)	NOP16 CGI-117 HSPC111	178	ribosomal large subunit biogenesis [GO:0042273]	intracellular membrane-bounded organelle [GO:0043231]; nucleolus [GO:0005730]; nucleoplasm [GO:0005654]	RNA binding [GO:0003723]	2|2|2|2	8	2	4	0|0|0|0|1|0|0|0|0|0|0|0|0|0|0|1|1|0|0|0|1|1|0|0|0|0|0|0|0|0|0|1|0|0|0|0|0|0|0|0|1|2|0|1	0.74	0.74	0.74	0.74	0.74	1.07	8.8	0.07	Helka	57 / 716	3.1	8	57	TRUE	IntAct	pubmed:35140242|imex:IM-28767	intact-miscore:0.27
MYC	BioID	P01106	Q9Y4A5	Prey	P01106_Q9Y4A5	TRRAP	Transformation/transcription domain-associated protein (350/400 kDa PCAF-associated factor) (PAF350/400) (STAF40) (Tra1 homolog)	TRRAP PAF400	3859	chromatin organization [GO:0006325]; DNA repair [GO:0006281]; positive regulation of DNA-templated transcription [GO:0045893]; positive regulation of double-strand break repair via homologous recombination [GO:1905168]; regulation of apoptotic process [GO:0042981]; regulation of cell cycle [GO:0051726]; regulation of DNA repair [GO:0006282]; regulation of DNA-templated transcription [GO:0006355];…	Golgi apparatus [GO:0005794]; NuA4 histone acetyltransferase complex [GO:0035267]; nucleoplasm [GO:0005654]; nucleosome [GO:0000786]; nucleus [GO:0005634]; SAGA complex [GO:0000124]; Swr1 complex [GO:0000812]; transcription factor TFTC complex [GO:0033276]	transcription coregulator activity [GO:0003712]	218|213|221|217	869	217.25	4	0|0|2|1|2|0|2|0|0|0|0|0|0|0|0|0|0|0|0|0|0|0|0|0|0|0|0|0|0|0|0|1|1|0|0|0|0|0|0|0|0|0|0|0	1	1	1	1	1	194.02	1062.11	0	Helka	13 / 716	1.6	3	13	TRUE	IntAct	pubmed:9708738|pubmed:9708738|pubmed:17353931|pubmed:17314511|pubmed:21150319|imex:IM-16995|pubmed:35140242|imex:IM-28767|pubmed:35140242|imex:IM-28767	intact-miscore:0.85|intact-miscore:0.85|author score:"Number of different experiments interaction was observed in: 1"|author score:0.238|intact-miscore:0.85|intact-miscore:0.85|intact-miscore:0.85|intact-miscore:0.85|intact-miscore:0.85
MYC	BioID	P01106	Q9Y6J9	Prey	P01106_Q9Y6J9	TAF6L	TAF6-like RNA polymerase II p300/CBP-associated factor-associated factor 65 kDa subunit 6L (TAF6L) (PCAF-associated factor 65-alpha) (PAF65-alpha)	TAF6L PAF65A	622	chromatin remodeling [GO:0006338]; positive regulation of DNA-templated transcription [GO:0045893]; regulation of DNA repair [GO:0006282]; regulation of DNA-templated transcription [GO:0006355]; regulation of RNA splicing [GO:0043484]; regulation of somatic stem cell population maintenance [GO:1904672]; regulation of transcription by RNA polymerase II [GO:0006357]; RNA polymerase II preinitiation…	extracellular exosome [GO:0070062]; histone deacetylase complex [GO:0000118]; nucleoplasm [GO:0005654]; nucleus [GO:0005634]; SAGA complex [GO:0000124]; SLIK (SAGA-like) complex [GO:0046695]; transcription factor TFIID complex [GO:0005669]	DNA binding [GO:0003677]; protein heterodimerization activity [GO:0046982]; RNA polymerase II general transcription initiation factor activity [GO:0016251]; transcription coactivator activity [GO:0003713]	32|33|33|36	134	33.5	4	6|5|2|3|7|4|3|0|4|3|0|0|0|0|0|0|0|0|0|0|0|0|0|0|0|0|1|3|0|0|0|2|0|0|0|1|0|0|0|0|2|1|0|0	1	1	1	1	1	10.44	31.36	0	Helka	32 / 716	2.2	9	32	TRUE	IntAct	pubmed:35140242|imex:IM-28767	intact-miscore:0.27
ESR1	BioID	P03372	P03372	Bait	P03372_P03372	ESR1	Estrogen receptor (ER) (ER-alpha) (Estradiol receptor) (Nuclear receptor subfamily 3 group A member 1)	ESR1 ESR NR3A1	595	androgen metabolic process [GO:0008209]; antral ovarian follicle growth [GO:0001547]; cellular response to estradiol stimulus [GO:0071392]; cellular response to estrogen stimulus [GO:0071391]; chromatin remodeling [GO:0006338]; epithelial cell development [GO:0002064]; epithelial cell proliferation involved in mammary gland duct elongation [GO:0060750]; fibroblast proliferation [GO:0048144]; intr…	chromatin [GO:0000785]; cytoplasm [GO:0005737]; cytosol [GO:0005829]; euchromatin [GO:0000791]; Golgi apparatus [GO:0005794]; membrane [GO:0016020]; nucleoplasm [GO:0005654]; nucleus [GO:0005634]; plasma membrane [GO:0005886]; protein-containing complex [GO:0032991]; transcription regulator complex [GO:0005667]	14-3-3 protein binding [GO:0071889]; ATPase binding [GO:0051117]; beta-catenin binding [GO:0008013]; calmodulin binding [GO:0005516]; chromatin binding [GO:0003682]; DNA-binding transcription activator activity, RNA polymerase II-specific [GO:0001228]; DNA-binding transcription factor activity [GO:0003700]; DNA-binding transcription factor activity, RNA polymerase II-specific [GO:0000981]; enzyme…	16|14|21|19	70	17.5	4	0|0|0|0|0|0|0|0|0|0|0|0|0|0|0|0|0|0|0|0|0|0|0|0|0|0|0|0|0|0|0|0|0|0|0|0|0|0|0|0|0|0|0|0	1	1	1	1	1	22.03	175	0	Helka	/ 716	0		0	TRUE	IntAct	imex:IM-13780|pubmed:21182205|imex:IM-13780|pubmed:21182205|imex:IM-13780|pubmed:21182205|imex:IM-13780|pubmed:21182205|imex:IM-13780|pubmed:21182205|imex:IM-13780|pubmed:21182205|pubmed:11265755|imex:IM-16886|pubmed:11265755|imex:IM-16886|pubmed:11265755|imex:IM-16886|pubmed:11265755|imex:IM-16886|pubmed:11265755|imex:IM-16886|pubmed:11265755|imex:IM-16886|pubmed:11682626|pubmed:11682626|pubmed:…	intact-miscore:0.87|intact-miscore:0.87|intact-miscore:0.87|intact-miscore:0.87|intact-miscore:0.87|intact-miscore:0.87|intact-miscore:0.87|intact-miscore:0.87|intact-miscore:0.87|intact-miscore:0.87|intact-miscore:0.87|intact-miscore:0.87|intact-miscore:0.87|intact-miscore:0.87|intact-miscore:0.87|intact-miscore:0.87|intact-miscore:0.87|intact-miscore:0.87|intact-miscore:0.87|intact-miscore:0.87…
ESR1	BioID	P03372	P49207	Prey	P03372_P49207	RPL34	Large ribosomal subunit protein eL34 (60S ribosomal protein L34)	RPL34	117	cytoplasmic translation [GO:0002181]; translation [GO:0006412]	cytoplasm [GO:0005737]; cytosol [GO:0005829]; cytosolic large ribosomal subunit [GO:0022625]; cytosolic ribosome [GO:0022626]; endoplasmic reticulum [GO:0005783]; extracellular exosome [GO:0070062]; nucleolus [GO:0005730]; synapse [GO:0045202]	cadherin binding [GO:0045296]; RNA binding [GO:0003723]; structural constituent of ribosome [GO:0003735]	7|6|7|5	25	6.25	4	1|1|2|0|2|0|2|0|1|0|2|1|4|3|4|3|3|1|4|3|2|3|1|2|0|0|2|0|0|0|0|0|0|0|1|2|1|0|1|2|2|5|1|1	0.82	0.93	0.82	0.93	0.82	0.41	4.37	0.05	Helka	247 / 716	3	12	247	TRUE	IntAct	pubmed:35140242|imex:IM-28767	intact-miscore:0.27
ESR1	BioID	P03372	Q13162	Prey	P03372_Q13162	PRDX4	Peroxiredoxin-4 (EC 1.11.1.24) (Antioxidant enzyme AOE372) (AOE37-2) (Peroxiredoxin IV) (Prx-IV) (Thioredoxin peroxidase AO372) (Thioredoxin-dependent peroxide reductase A0372) (Thioredoxin-dependent peroxiredoxin 4)	PRDX4	271	cell redox homeostasis [GO:0045454]; extracellular matrix organization [GO:0030198]; hydrogen peroxide catabolic process [GO:0042744]; I-kappaB phosphorylation [GO:0007252]; male gonad development [GO:0008584]; negative regulation of male germ cell proliferation [GO:2000255]; protein maturation by protein folding [GO:0022417]; response to oxidative stress [GO:0006979]; spermatogenesis [GO:0007283]	cytosol [GO:0005829]; endoplasmic reticulum [GO:0005783]; extracellular exosome [GO:0070062]; extracellular region [GO:0005576]; ficolin-1-rich granule lumen [GO:1904813]; nucleus [GO:0005634]; secretory granule lumen [GO:0034774]	identical protein binding [GO:0042802]; molecular adaptor activity [GO:0060090]; molecular sequestering activity [GO:0140313]; thioredoxin peroxidase activity [GO:0008379]	3|2|2|4	11	2.75	4	0|0|2|0|0|0|0|0|0|0|0|0|0|2|2|2|2|0|0|0|0|0|0|2|0|0|0|0|0|0|0|0|0|0|0|0|3|0|0|0|0|0|0|0	0.74	0.92	0.74	0.92	0.74	0.49	8.07	0.07	Helka	394 / 716	3.6	29	394	TRUE	IntAct	pubmed:31527615|imex:IM-26954	intact-miscore:0.35
ESR1	BioID	P03372	Q16775	Prey	P03372_Q16775	HAGH	Hydroxyacylglutathione hydrolase, mitochondrial (EC 3.1.2.6) (Glyoxalase II) (Glx II)	HAGH GLO2 HAGH1	308	glutathione biosynthetic process [GO:0006750]; glutathione metabolic process [GO:0006749]; methylglyoxal catabolic process to D-lactate via S-lactoyl-glutathione [GO:0019243]	cytoplasm [GO:0005737]; cytosol [GO:0005829]; mitochondrial matrix [GO:0005759]; mitochondrion [GO:0005739]	hydroxyacylglutathione hydrolase activity [GO:0004416]; metal ion binding [GO:0046872]	11|12|12|14	49	12.25	4	1|0|10|3|12|4|3|0|1|1|7|4|6|5|2|4|3|0|3|6|2|4|0|0|0|0|0|0|0|0|2|0|0|0|5|3|1|0|6|5|5|5|1|0	0.84	0.91	0.84	0.91	0.84	1.26	4.73	0.04	Helka	96 / 716	3.3	12	96	TRUE	IntAct	pubmed:35140242|imex:IM-28767	intact-miscore:0.27
ESR1	BioID	P03372	Q9NPA3	Prey	P03372_Q9NPA3	MID1IP1	Mid1-interacting protein 1 (Gastrulation-specific G12-like protein) (Mid1-interacting G12-like protein) (Protein STRAIT11499) (Spot 14-related protein) (S14R) (Spot 14-R)	MID1IP1 MIG12	183	lipid metabolic process [GO:0006629]; negative regulation of microtubule depolymerization [GO:0007026]; positive regulation of fatty acid biosynthetic process [GO:0045723]; positive regulation of ligase activity [GO:0051351]; protein polymerization [GO:0051258]; regulation of lipid biosynthetic process [GO:0046890]	cytosol [GO:0005829]; microtubule [GO:0005874]; microtubule cytoskeleton [GO:0015630]; nucleus [GO:0005634]	identical protein binding [GO:0042802]	3|4|5|6	18	4.5	4	0|0|0|0|0|2|0|0|0|0|0|0|0|0|1|0|0|0|1|2|0|0|0|0|0|0|0|0|0|0|0|0|0|0|1|0|0|0|3|4|1|0|1|2	0.88	0.97	0.88	0.97	0.88	1.06	11	0.03	Helka	1 / 716	1	1	1	TRUE	IntAct	pubmed:35140242|imex:IM-28767	intact-miscore:0.27
TP53	BioID	P04637	P04637	Bait	P04637_P04637	TP53	Cellular tumor antigen p53 (Antigen NY-CO-13) (Phosphoprotein p53) (Tumor suppressor p53)	TP53 P53	393	autophagy [GO:0006914]; B cell lineage commitment [GO:0002326]; bone marrow development [GO:0048539]; cardiac muscle cell apoptotic process [GO:0010659]; cardiac septum morphogenesis [GO:0060411]; cellular response to actinomycin D [GO:0072717]; cellular response to gamma radiation [GO:0071480]; cellular response to glucose starvation [GO:0042149]; cellular response to hypoxia [GO:0071456]; cellu…	centrosome [GO:0005813]; chromatin [GO:0000785]; cytoplasm [GO:0005737]; cytosol [GO:0005829]; endoplasmic reticulum [GO:0005783]; germ cell nucleus [GO:0043073]; mitochondrial matrix [GO:0005759]; mitochondrion [GO:0005739]; nuclear matrix [GO:0016363]; nucleolus [GO:0005730]; nucleoplasm [GO:0005654]; nucleus [GO:0005634]; PML body [GO:0016605]; protein-containing complex [GO:0032991]; replicat…	14-3-3 protein binding [GO:0071889]; ATP-dependent DNA/DNA annealing activity [GO:0036310]; chromatin binding [GO:0003682]; cis-regulatory region sequence-specific DNA binding [GO:0000987]; copper ion binding [GO:0005507]; core promoter sequence-specific DNA binding [GO:0001046]; disordered domain specific binding [GO:0097718]; DNA binding [GO:0003677]; DNA-binding transcription activator activit…	4|5|0|0	9	2.25	4	0|0|0|1|0|1|0|0|0|0|0|0|0|0|0|0|0|0|1|1|1|2|0|0|0|0|1|4|0|0|0|0|1|1|2|2|0|1|1|0|0|2|2|1	0.46	0.96	0.46	0.96	0.46	-3.49	3.96	0.23	Helka	131 / 716	10.8	139	131	TRUE	IntAct	imex:IM-14511|pubmed:16291740|imex:IM-14511|pubmed:16291740|pubmed:17612295|pubmed:17612295|pubmed:19339993|imex:IM-13828|mint:MINT-7263614|doi:10.1038/emboj.2009.83|pubmed:19339993|imex:IM-13828|mint:MINT-7263614|doi:10.1038/emboj.2009.83|pubmed:19339993|imex:IM-13828|mint:MINT-7263614|doi:10.1038/emboj.2009.83|pubmed:19339993|imex:IM-13828|mint:MINT-7263614|doi:10.1038/emboj.2009.83|imex:IM-153…	intact-miscore:0.98|intact-miscore:0.98|intact-miscore:0.98|intact-miscore:0.98|intact-miscore:0.98|intact-miscore:0.98|intact-miscore:0.98|intact-miscore:0.98|intact-miscore:0.98|intact-miscore:0.98|intact-miscore:0.98|intact-miscore:0.98|intact-miscore:0.98|intact-miscore:0.98|intact-miscore:0.98|intact-miscore:0.98|intact-miscore:0.98|intact-miscore:0.98|intact-miscore:0.98|intact-miscore:0.98…
TP53	BioID	P04637	Q12888	Prey	P04637_Q12888	TP53BP1	TP53-binding protein 1 (53BP1) (p53-binding protein 1) (p53BP1)	TP53BP1	1972	cellular response to X-ray [GO:0071481]; DNA damage checkpoint signaling [GO:0000077]; DNA damage response [GO:0006974]; double-strand break repair via nonhomologous end joining [GO:0006303]; negative regulation of double-strand break repair via homologous recombination [GO:2000042]; positive regulation of DNA-binding transcription factor activity [GO:0051091]; positive regulation of DNA-template…	chromosome, telomeric region [GO:0000781]; cytoplasm [GO:0005737]; DNA repair complex [GO:1990391]; kinetochore [GO:0000776]; nuclear body [GO:0016604]; nucleoplasm [GO:0005654]; nucleus [GO:0005634]; replication fork [GO:0005657]; site of double-strand break [GO:0035861]	damaged DNA binding [GO:0003684]; histone binding [GO:0042393]; methylated histone binding [GO:0035064]; p53 binding [GO:0002039]; RNA polymerase II-specific DNA-binding transcription factor binding [GO:0061629]; telomeric DNA binding [GO:0042162]; transcription coregulator activity [GO:0003712]; ubiquitin modification-dependent histone binding [GO:0061649]	6|2|7|7	22	5.5	4	4|5|7|2|4|3|8|1|6|2|0|0|1|1|0|3|2|0|0|0|0|0|1|0|0|1|2|5|1|1|2|7|0|0|4|1|0|0|0|0|0|5|2|3	0.41	0.6	0.41	0.6	0.41	-4.76	2.88	0.25	Helka	146 / 716	13.5	124	146	TRUE	IntAct	pubmed:11877378|pubmed:22653443|imex:IM-20828|mint:MINT-8415349|pubmed:17805299|doi:10.1038/nature06092|imex:IM-21840|pubmed:19433796|doi:10.1073/pnas.0902873106|imex:IM-22437|pubmed:19433796|doi:10.1073/pnas.0902873106|imex:IM-22437|pubmed:25837623|doi:10.1371/journal.pbio.1002114|imex:IM-24227	intact-miscore:0.83|intact-miscore:0.83|intact-miscore:0.83|intact-miscore:0.83|intact-miscore:0.83|intact-miscore:0.83
TP53	BioID	P04637	Q13625	Prey	P04637_Q13625	TP53BP2	Apoptosis-stimulating of p53 protein 2 (Bcl2-binding protein) (Bbp) (Renal carcinoma antigen NY-REN-51) (Tumor suppressor p53-binding protein 2) (53BP2) (p53-binding protein 2) (p53BP2)	TP53BP2 ASPP2 BBP	1128	cell cycle [GO:0007049]; intrinsic apoptotic signaling pathway by p53 class mediator [GO:0072332]; negative regulation of cell cycle [GO:0045786]; positive regulation of execution phase of apoptosis [GO:1900119]; signal transduction [GO:0007165]	cell junction [GO:0030054]; cytoplasm [GO:0005737]; cytosol [GO:0005829]; nucleoplasm [GO:0005654]; nucleus [GO:0005634]; perinuclear region of cytoplasm [GO:0048471]	identical protein binding [GO:0042802]; NF-kappaB binding [GO:0051059]; p53 binding [GO:0002039]; SH3 domain binding [GO:0017124]	8|5|8|5	26	6.5	4	0|0|1|0|1|0|0|0|0|0|5|4|5|3|6|6|5|1|4|8|4|6|5|3|6|8|0|0|6|7|1|0|8|8|5|4|8|11|6|6|0|0|8|6	0.02	0.03	0.02	0.03	0.02	-6.92	1.73	0.55	Helka	78 / 716	6.6	16	78	TRUE	IntAct	pubmed:8875926|mint:MINT-5221208|mint:MINT-8152471|pubmed:21513714|mint:d-11-00113|imex:IM-23830|pubmed:14985081|imex:IM-23830|pubmed:14985081|imex:IM-23830|pubmed:14985081|pubmed:18275817|doi:10.1016/j.str.2007.11.012|imex:IM-8951|pubmed:18275817|doi:10.1016/j.str.2007.11.012|imex:IM-8951|pubmed:25502805|imex:IM-26175|doi:10.1371/journal.pgen.1004819|imex:IM-27438|doi:10.1038/s41467-019-11959-3|…	intact-miscore:0.90|intact-miscore:0.90|intact-miscore:0.90|intact-miscore:0.90|intact-miscore:0.90|intact-miscore:0.90|intact-miscore:0.90|intact-miscore:0.90|intact-miscore:0.90
SP1	BioID	P08047	P08047	Bait	P08047_P08047	SP1	Transcription factor Sp1	SP1 TSFP1	785	cellular response to estrogen stimulus [GO:0071391]; cellular response to insulin stimulus [GO:0032869]; cellular response to wortmannin [GO:1904568]; cellular response to zinc ion starvation [GO:0034224]; positive regulation by host of viral transcription [GO:0043923]; positive regulation of amyloid-beta formation [GO:1902004]; positive regulation of angiogenesis [GO:0045766]; positive regulatio…	chromatin [GO:0000785]; cytoplasm [GO:0005737]; euchromatin [GO:0000791]; nucleoplasm [GO:0005654]; nucleus [GO:0005634]; protein-DNA complex [GO:0032993]; transcription repressor complex [GO:0017053]	bHLH transcription factor binding [GO:0043425]; DNA binding [GO:0003677]; DNA-binding transcription activator activity, RNA polymerase II-specific [GO:0001228]; DNA-binding transcription factor activity [GO:0003700]; DNA-binding transcription factor activity, RNA polymerase II-specific [GO:0000981]; double-stranded DNA binding [GO:0003690]; histone acetyltransferase binding [GO:0035035]; histone …	127|128|92|125	472	118	4	0|0|0|0|0|0|0|0|0|0|0|0|0|0|0|0|0|0|0|0|0|0|0|0|0|0|0|0|0|0|0|0|0|0|0|0|0|0|0|0|0|0|0|0	1	1	1	1	1	134.18	1180	0	Helka	21 / 716	1.9	6	21	TRUE	IntAct	pubmed:10393239|mint:MINT-5211634|pubmed:10393239|mint:MINT-5211634|pubmed:20211142|doi:10.1016/j.cell.2010.01.044|imex:IM-28774|pubmed:20211142|doi:10.1016/j.cell.2010.01.044|imex:IM-28774	intact-miscore:0.57|intact-miscore:0.57|intact-miscore:0.57|intact-miscore:0.57
SP1	BioID	P08047	Q04837	Prey	P08047_Q04837	SSBP1	Single-stranded DNA-binding protein, mitochondrial (Mt-SSB) (MtSSB) (PWP1-interacting protein 17)	SSBP1 SSBP	148	DNA unwinding involved in DNA replication [GO:0006268]; mitochondrial DNA replication [GO:0006264]; mitochondrion morphogenesis [GO:0070584]; positive regulation of helicase activity [GO:0051096]; positive regulation of mitochondrial DNA replication [GO:0090297]; protein homotetramerization [GO:0051289]	extracellular exosome [GO:0070062]; mitochondrial matrix [GO:0005759]; mitochondrial nucleoid [GO:0042645]; mitochondrion [GO:0005739]; nucleus [GO:0005634]	chromatin binding [GO:0003682]; identical protein binding [GO:0042802]; protein homodimerization activity [GO:0042803]; RNA binding [GO:0003723]; single-stranded DNA binding [GO:0003697]	2|2|4|2	10	2.5	4	0|0|0|0|0|0|0|0|0|0|0|0|0|0|0|0|0|0|0|0|0|0|0|0|0|0|0|0|0|0|0|0|0|0|0|0|0|0|0|0|0|0|0|0	0.95	1	0.95	1	0.95	2.76	25	0.01	Helka	169 / 716	3.4	18	169	TRUE	IntAct	pubmed:35140242|imex:IM-28767|pubmed:35140242|imex:IM-28767	intact-miscore:0.42|intact-miscore:0.42
SP1	BioID	P08047	Q4LE39	Prey	P08047_Q4LE39	ARID4B	AT-rich interactive domain-containing protein 4B (ARID domain-containing protein 4B) (180 kDa Sin3-associated polypeptide) (Sin3-associated polypeptide p180) (Breast cancer-associated antigen BRCAA1) (Histone deacetylase complex subunit SAP180) (Retinoblastoma-binding protein 1-like 1)	ARID4B BRCAA1 RBBP1L1 RBP1L1 SAP180	1312	DNA methylation [GO:0006306]; establishment of Sertoli cell barrier [GO:0097368]; negative regulation of cell migration [GO:0030336]; negative regulation of stem cell population maintenance [GO:1902455]; negative regulation of transcription by RNA polymerase II [GO:0000122]; negative regulation of transforming growth factor beta receptor signaling pathway [GO:0030512]; positive regulation of stem…	cytosol [GO:0005829]; mitochondrion [GO:0005739]; nucleoplasm [GO:0005654]; nucleus [GO:0005634]; Sin3 complex [GO:0016580]	transcription cis-regulatory region binding [GO:0000976]	10|10|7|6	33	8.25	4	3|4|3|0|1|1|1|0|1|1|3|2|2|1|0|3|2|0|1|1|2|2|2|2|0|0|2|1|2|1|3|4|0|0|2|0|0|0|0|0|2|3|1|1	0.98	1	0.98	1	0.98	2.55	6.05	0	Helka	41 / 716	1.8	5	41	TRUE	IntAct	pubmed:35140242|imex:IM-28767	intact-miscore:0.27
SP1	BioID	P08047	Q9H0E3	Prey	P08047_Q9H0E3	SAP130	Histone deacetylase complex subunit SAP130 (130 kDa Sin3-associated polypeptide) (Sin3-associated polypeptide p130)	SAP130	1048	negative regulation of cell migration [GO:0030336]; negative regulation of stem cell population maintenance [GO:1902455]; negative regulation of transcription by RNA polymerase II [GO:0000122]; negative regulation of transforming growth factor beta receptor signaling pathway [GO:0030512]; positive regulation of stem cell population maintenance [GO:1902459]	nuclear speck [GO:0016607]; nucleus [GO:0005634]; Sin3 complex [GO:0016580]; Sin3-type complex [GO:0070822]		10|8|9|7	34	8.5	4	4|3|7|2|7|3|3|1|3|3|2|1|2|1|1|1|2|0|0|1|2|3|1|3|0|0|5|4|2|3|5|3|0|1|0|0|1|1|0|0|4|3|1|3	0.82	0.95	0.82	0.95	0.82	0.44	4.07	0.05	Helka	80 / 716	3.3	18	80	TRUE	IntAct	pubmed:35140242|imex:IM-28767	intact-miscore:0.27
NFIC	BioID	P08651	O00712	Prey	P08651_O00712	NFIB	Nuclear factor 1 B-type (NF1-B) (Nuclear factor 1/B) (CCAAT-box-binding transcription factor) (CTF) (Nuclear factor I/B) (NF-I/B) (NFI-B) (TGGCA-binding protein)	NFIB	420	anterior commissure morphogenesis [GO:0021960]; brain development [GO:0007420]; cell differentiation involved in salivary gland development [GO:0060689]; cell proliferation in forebrain [GO:0021846]; chondrocyte differentiation [GO:0002062]; club cell differentiation [GO:0060486]; commissural neuron axon guidance [GO:0071679]; DNA replication [GO:0006260]; exit from mitosis [GO:0010458]; gene exp…	cerebellar mossy fiber [GO:0044300]; chromatin [GO:0000785]; fibrillar center [GO:0001650]; nucleoplasm [GO:0005654]; nucleus [GO:0005634]	DNA binding [GO:0003677]; DNA-binding transcription activator activity, RNA polymerase II-specific [GO:0001228]; DNA-binding transcription factor activity, RNA polymerase II-specific [GO:0000981]; RNA polymerase II cis-regulatory region sequence-specific DNA binding [GO:0000978]; sequence-specific double-stranded DNA binding [GO:1990837]; transcription regulator inhibitor activity [GO:0140416]	134|130	264	132	2	0|0|0|0|1|1|0|0|0|0	1	1	1	1	1	186.53	660	0	Tan	48 / 716	2.5	17	48	TRUE	IntAct	pubmed:25258084|doi:"https://doi.org/10.1126/science.1251033"|imex:IM-24263|pubmed:35140242|imex:IM-28767|pubmed:35140242|imex:IM-28767|pubmed:35140242|imex:IM-28767|pubmed:35140242|imex:IM-28767	intact-miscore:0.60|intact-miscore:0.60|intact-miscore:0.60|intact-miscore:0.60|intact-miscore:0.60
NFIC	BioID	P08651	O00712	Prey	P08651_O00712	NFIB	Nuclear factor 1 B-type (NF1-B) (Nuclear factor 1/B) (CCAAT-box-binding transcription factor) (CTF) (Nuclear factor I/B) (NF-I/B) (NFI-B) (TGGCA-binding protein)	NFIB	420	anterior commissure morphogenesis [GO:0021960]; brain development [GO:0007420]; cell differentiation involved in salivary gland development [GO:0060689]; cell proliferation in forebrain [GO:0021846]; chondrocyte differentiation [GO:0002062]; club cell differentiation [GO:0060486]; commissural neuron axon guidance [GO:0071679]; DNA replication [GO:0006260]; exit from mitosis [GO:0010458]; gene exp…	cerebellar mossy fiber [GO:0044300]; chromatin [GO:0000785]; fibrillar center [GO:0001650]; nucleoplasm [GO:0005654]; nucleus [GO:0005634]	DNA binding [GO:0003677]; DNA-binding transcription activator activity, RNA polymerase II-specific [GO:0001228]; DNA-binding transcription factor activity, RNA polymerase II-specific [GO:0000981]; RNA polymerase II cis-regulatory region sequence-specific DNA binding [GO:0000978]; sequence-specific double-stranded DNA binding [GO:1990837]; transcription regulator inhibitor activity [GO:0140416]	33|43	76	38	2	0|0|0|0|1|1|0|0|0|0|0|0|0|0|0|0|0|0|0|0|0|0|0|0|0|0|0|0|0|0|2|1|0|0|0|0|0|0|0|0|0|0|0|0	1	1	1	1	1	42.83	334.4	0	Helka	48 / 716	2.5	17	48	TRUE	IntAct	pubmed:25258084|doi:"https://doi.org/10.1126/science.1251033"|imex:IM-24263|pubmed:35140242|imex:IM-28767|pubmed:35140242|imex:IM-28767|pubmed:35140242|imex:IM-28767|pubmed:35140242|imex:IM-28767	intact-miscore:0.60|intact-miscore:0.60|intact-miscore:0.60|intact-miscore:0.60|intact-miscore:0.60
NFIC	BioID	P08651	O14497	Prey	P08651_O14497	ARID1A	AT-rich interactive domain-containing protein 1A (ARID domain-containing protein 1A) (B120) (BRG1-associated factor 250) (BAF250) (BRG1-associated factor 250a) (BAF250A) (Osa homolog 1) (hOSA1) (SWI-like protein) (SWI/SNF complex protein p270) (SWI/SNF-related, matrix-associated, actin-dependent regulator of chromatin subfamily F member 1) (hELD)	ARID1A BAF250 BAF250A C1orf4 OSA1 SMARCF1	2285	androgen receptor signaling pathway [GO:0030521]; chromatin remodeling [GO:0006338]; glucocorticoid receptor signaling pathway [GO:0042921]; intracellular estrogen receptor signaling pathway [GO:0030520]; nervous system development [GO:0007399]; nucleosome disassembly [GO:0006337]; positive regulation of cell differentiation [GO:0045597]; positive regulation of DNA-templated transcription [GO:004…	bBAF complex [GO:0140092]; brahma complex [GO:0035060]; chromatin [GO:0000785]; nBAF complex [GO:0071565]; npBAF complex [GO:0071564]; nucleoplasm [GO:0005654]; nucleus [GO:0005634]; SWI/SNF complex [GO:0016514]	DNA binding [GO:0003677]; nuclear receptor binding [GO:0016922]; transcription coactivator activity [GO:0003713]	127|145	272	136	2	23|24|25|27|30|14|34|44|27|23	1	1	1	1	1	27.16	5.02	0	Tan	129 / 716	7.7	51	129	TRUE	IntAct	pubmed:35140242|imex:IM-28767	intact-miscore:0.27
NFIC	BioID	P08651	O14497	Prey	P08651_O14497	ARID1A	AT-rich interactive domain-containing protein 1A (ARID domain-containing protein 1A) (B120) (BRG1-associated factor 250) (BAF250) (BRG1-associated factor 250a) (BAF250A) (Osa homolog 1) (hOSA1) (SWI-like protein) (SWI/SNF complex protein p270) (SWI/SNF-related, matrix-associated, actin-dependent regulator of chromatin subfamily F member 1) (hELD)	ARID1A BAF250 BAF250A C1orf4 OSA1 SMARCF1	2285	androgen receptor signaling pathway [GO:0030521]; chromatin remodeling [GO:0006338]; glucocorticoid receptor signaling pathway [GO:0042921]; intracellular estrogen receptor signaling pathway [GO:0030520]; nervous system development [GO:0007399]; nucleosome disassembly [GO:0006337]; positive regulation of cell differentiation [GO:0045597]; positive regulation of DNA-templated transcription [GO:004…	bBAF complex [GO:0140092]; brahma complex [GO:0035060]; chromatin [GO:0000785]; nBAF complex [GO:0071565]; npBAF complex [GO:0071564]; nucleoplasm [GO:0005654]; nucleus [GO:0005634]; SWI/SNF complex [GO:0016514]	DNA binding [GO:0003677]; nuclear receptor binding [GO:0016922]; transcription coactivator activity [GO:0003713]	46|46	92	46	2	23|26|17|5|20|10|15|4|18|4|3|3|2|1|1|0|2|0|0|0|0|0|1|1|1|2|30|40|5|4|20|24|1|0|7|8|4|9|0|0|19|17|3|5	0.94	0.94	0.94	0.94	0.94	2.8	5.7	0.01	Helka	129 / 716	7.7	51	129	TRUE	IntAct	pubmed:35140242|imex:IM-28767	intact-miscore:0.27
NFIC	BioID	P08651	O14686	Prey	P08651_O14686	KMT2D	Histone-lysine N-methyltransferase 2D (Lysine N-methyltransferase 2D) (EC 2.1.1.364) (ALL1-related protein) (Myeloid/lymphoid or mixed-lineage leukemia protein 2)	KMT2D ALR MLL2 MLL4	5537	beta-catenin-TCF complex assembly [GO:1904837]; heterochromatin formation [GO:0031507]; methylation [GO:0032259]; oocyte growth [GO:0001555]; oogenesis [GO:0048477]; positive regulation of cell population proliferation [GO:0008284]; positive regulation of intracellular estrogen receptor signaling pathway [GO:0033148]; positive regulation of transcription by RNA polymerase II [GO:0045944]; regulat…	MLL3/4 complex [GO:0044666]; nucleoplasm [GO:0005654]; nucleus [GO:0005634]	DNA binding [GO:0003677]; histone binding [GO:0042393]; histone H3K4 methyltransferase activity [GO:0042800]; histone H3K4 monomethyltransferase activity [GO:0140945]; histone H3K4 trimethyltransferase activity [GO:0140999]; metal ion binding [GO:0046872]; transcription cis-regulatory region binding [GO:0000976]; transcription coactivator activity [GO:0003713]	87|93	180	90	2	33|12|23|34|35|11|11|9|5|10	1	1	1	1	1	5.77	4.92	0	Tan	41 / 716	1.6	5	41	TRUE	IntAct	pubmed:35140242|imex:IM-28767	intact-miscore:0.27
NFIC	BioID	P08651	O14686	Prey	P08651_O14686	KMT2D	Histone-lysine N-methyltransferase 2D (Lysine N-methyltransferase 2D) (EC 2.1.1.364) (ALL1-related protein) (Myeloid/lymphoid or mixed-lineage leukemia protein 2)	KMT2D ALR MLL2 MLL4	5537	beta-catenin-TCF complex assembly [GO:1904837]; heterochromatin formation [GO:0031507]; methylation [GO:0032259]; oocyte growth [GO:0001555]; oogenesis [GO:0048477]; positive regulation of cell population proliferation [GO:0008284]; positive regulation of intracellular estrogen receptor signaling pathway [GO:0033148]; positive regulation of transcription by RNA polymerase II [GO:0045944]; regulat…	MLL3/4 complex [GO:0044666]; nucleoplasm [GO:0005654]; nucleus [GO:0005634]	DNA binding [GO:0003677]; histone binding [GO:0042393]; histone H3K4 methyltransferase activity [GO:0042800]; histone H3K4 monomethyltransferase activity [GO:0140945]; histone H3K4 trimethyltransferase activity [GO:0140999]; metal ion binding [GO:0046872]; transcription cis-regulatory region binding [GO:0000976]; transcription coactivator activity [GO:0003713]	23|27	50	25	2	4|2|6|6|7|3|1|1|3|3|1|1|2|1|0|0|0|0|0|0|1|1|0|1|0|0|7|12|1|0|7|9|0|0|0|1|0|2|0|0|4|6|0|0	0.99	1	0.99	1	0.99	4.82	11.83	0	Helka	41 / 716	1.6	5	41	TRUE	IntAct	pubmed:35140242|imex:IM-28767	intact-miscore:0.27
NFIC	BioID	P08651	O15014	Prey	P08651_O15014	ZNF609	Zinc finger protein 609	ZNF609 KIAA0295	1411	muscle organ development [GO:0007517]; positive regulation of neuron migration [GO:2001224]; positive regulation of transcription by RNA polymerase II [GO:0045944]; regulation of myoblast proliferation [GO:2000291]; regulation of transcription by RNA polymerase II [GO:0006357]	nucleoplasm [GO:0005654]; nucleus [GO:0005634]	metal ion binding [GO:0046872]; promoter-specific chromatin binding [GO:1990841]	12|9	21	10.5	2	6|4|3|2|5|0|9|1|7|3|0|0|0|0|0|0|0|0|0|0|0|0|0|0|1|2|4|7|2|1|10|9|0|0|1|1|1|0|0|0|2|0|0|2	0.83	0.89	0.83	0.89	0.83	1.18	5.57	0.04	Helka	70 / 716	2.3	13	70	TRUE	IntAct	pubmed:35140242|imex:IM-28767	intact-miscore:0.27
NFIC	BioID	P08651	O15550	Prey	P08651_O15550	KDM6A	Lysine-specific demethylase 6A (EC 1.14.11.68) (Histone demethylase UTX) (Ubiquitously-transcribed TPR protein on the X chromosome) (Ubiquitously-transcribed X chromosome tetratricopeptide repeat protein) ([histone H3]-trimethyl-L-lysine(27) demethylase 6A)	KDM6A UTX	1401	chromatin remodeling [GO:0006338]; regulation of gene expression [GO:0010468]	histone methyltransferase complex [GO:0035097]; MLL3/4 complex [GO:0044666]; nucleoplasm [GO:0005654]; nucleus [GO:0005634]	chromatin DNA binding [GO:0031490]; histone demethylase activity [GO:0032452]; histone H3K27me2/H3K27me3 demethylase activity [GO:0071558]; metal ion binding [GO:0046872]; RNA polymerase II cis-regulatory region sequence-specific DNA binding [GO:0000978]	5|7	12	6	2	3|1|3|0|4|0|2|1|1|1|0|0|0|0|0|0|0|0|0|0|0|0|0|0|0|0|0|0|0|0|2|3|0|0|0|0|0|0|0|0|2|1|0|0	0.94	0.98	0.94	0.98	0.94	2.23	11	0.02	Helka	15 / 716	1	1	15	TRUE	IntAct	pubmed:35140242|imex:IM-28767	intact-miscore:0.27
NFIC	BioID	P08651	O60315	Prey	P08651_O60315	ZEB2	Zinc finger E-box-binding homeobox 2 (Smad-interacting protein 1) (SMADIP1) (Zinc finger homeobox protein 1b)	ZEB2 KIAA0569 SIP1 ZFHX1B ZFX1B HRIHFB2411	1214	anatomical structure development [GO:0048856]; astrocyte activation [GO:0048143]; developmental pigmentation [GO:0048066]; endothelial cell migration [GO:0043542]; endothelial cell proliferation [GO:0001935]; fibroblast activation [GO:0072537]; melanocyte migration [GO:0097324]; myofibroblast differentiation [GO:0036446]; negative regulation of fibroblast migration [GO:0010764]; negative regulati…	chromatin [GO:0000785]; cytosol [GO:0005829]; nucleolus [GO:0005730]; nucleoplasm [GO:0005654]; nucleus [GO:0005634]	DNA-binding transcription factor activity, RNA polymerase II-specific [GO:0000981]; DNA-binding transcription repressor activity, RNA polymerase II-specific [GO:0001227]; metal ion binding [GO:0046872]; phosphatase regulator activity [GO:0019208]; RNA polymerase II cis-regulatory region sequence-specific DNA binding [GO:0000978]	8|11	19	9.5	2	0|0|0|0|0|0|0|0|0|0	1	1	1	1	1	13.52	95	0	Tan	18 / 716	1.7	6	18	TRUE	IntAct	pubmed:35140242|imex:IM-28767	intact-miscore:0.27
NFIC	BioID	P08651	O60315	Prey	P08651_O60315	ZEB2	Zinc finger E-box-binding homeobox 2 (Smad-interacting protein 1) (SMADIP1) (Zinc finger homeobox protein 1b)	ZEB2 KIAA0569 SIP1 ZFHX1B ZFX1B HRIHFB2411	1214	anatomical structure development [GO:0048856]; astrocyte activation [GO:0048143]; developmental pigmentation [GO:0048066]; endothelial cell migration [GO:0043542]; endothelial cell proliferation [GO:0001935]; fibroblast activation [GO:0072537]; melanocyte migration [GO:0097324]; myofibroblast differentiation [GO:0036446]; negative regulation of fibroblast migration [GO:0010764]; negative regulati…	chromatin [GO:0000785]; cytosol [GO:0005829]; nucleolus [GO:0005730]; nucleoplasm [GO:0005654]; nucleus [GO:0005634]	DNA-binding transcription factor activity, RNA polymerase II-specific [GO:0000981]; DNA-binding transcription repressor activity, RNA polymerase II-specific [GO:0001227]; metal ion binding [GO:0046872]; phosphatase regulator activity [GO:0019208]; RNA polymerase II cis-regulatory region sequence-specific DNA binding [GO:0000978]	3|3	6	3	2	0|0|0|0|0|0|0|0|0|0|0|0|0|0|0|0|0|0|0|0|0|0|0|0|0|0|0|0|0|0|0|0|0|0|0|0|0|0|0|0|0|0|0|0	0.99	0.99	0.99	0.99	0.99	4.6	30	0	Helka	18 / 716	1.7	6	18	TRUE	IntAct	pubmed:35140242|imex:IM-28767	intact-miscore:0.27
NFIC	BioID	P08651	O60907	Prey	P08651_O60907	TBL1X	F-box-like/WD repeat-containing protein TBL1X (SMAP55) (Transducin beta-like protein 1X) (Transducin-beta-like protein 1, X-linked)	TBL1X TBL1	577	negative regulation of transcription by RNA polymerase II [GO:0000122]; positive regulation of canonical Wnt signaling pathway [GO:0090263]; positive regulation of DNA-templated transcription [GO:0045893]; positive regulation of transcription by RNA polymerase II [GO:0045944]; proteasome-mediated ubiquitin-dependent protein catabolic process [GO:0043161]; protein stabilization [GO:0050821]; prote…	histone deacetylase complex [GO:0000118]; mitotic spindle [GO:0072686]; nucleoplasm [GO:0005654]; nucleus [GO:0005634]; transcription repressor complex [GO:0017053]	histone binding [GO:0042393]; identical protein binding [GO:0042802]; transcription cis-regulatory region binding [GO:0000976]; transcription corepressor activity [GO:0003714]	17|16	33	16.5	2	12|10|7|4|9|3|10|5|10|6|0|0|4|0|0|0|0|0|0|0|0|0|0|2|0|5|1|0|0|0|7|5|0|0|0|0|0|0|0|0|7|0|0|0	0.92	0.93	0.92	0.93	0.92	2.31	6.79	0.02	Helka	9 / 716	1.1	2	9	TRUE	IntAct	pubmed:35140242|imex:IM-28767	intact-miscore:0.27
NFIC	BioID	P08651	O75376	Prey	P08651_O75376	NCOR1	Nuclear receptor corepressor 1 (N-CoR) (N-CoR1)	NCOR1 KIAA1047	2440	chromatin organization [GO:0006325]; locomotor rhythm [GO:0045475]; negative regulation of androgen receptor signaling pathway [GO:0060766]; negative regulation of DNA-templated transcription [GO:0045892]; negative regulation of fatty acid metabolic process [GO:0045922]; negative regulation of glycolytic process [GO:0045820]; negative regulation of JNK cascade [GO:0046329]; negative regulation of…	chromatin [GO:0000785]; cytosol [GO:0005829]; histone deacetylase complex [GO:0000118]; membrane [GO:0016020]; mitotic spindle [GO:0072686]; nucleoplasm [GO:0005654]; nucleus [GO:0005634]; transcription repressor complex [GO:0017053]	histone deacetylase binding [GO:0042826]; nuclear receptor binding [GO:0016922]; nuclear thyroid hormone receptor binding [GO:0046966]; RNA polymerase II-specific DNA-binding transcription factor binding [GO:0061629]; transcription cis-regulatory region binding [GO:0000976]; transcription corepressor activity [GO:0003714]	42|41	83	41.5	2	16|19|24|11|26|13|20|11|22|11|4|2|5|1|8|3|1|0|1|2|3|1|1|2|1|2|30|31|4|4|16|20|0|0|5|3|2|4|0|0|26|18|3|2	0.92	0.92	0.92	0.92	0.92	2.38	4.83	0.02	Helka	101 / 716	8.3	62	101	TRUE	IntAct	pubmed:35140242|imex:IM-28767	intact-miscore:0.27
NFIC	BioID	P08651	O75461	Prey	P08651_O75461	E2F6	Transcription factor E2F6 (E2F-6)	E2F6	281	negative regulation of transcription by RNA polymerase II [GO:0000122]; regulation of transcription by RNA polymerase II [GO:0006357]; regulation of transcription involved in G1/S transition of mitotic cell cycle [GO:0000083]	chromatin [GO:0000785]; MLL1 complex [GO:0071339]; nucleoplasm [GO:0005654]; nucleus [GO:0005634]; RNA polymerase II transcription regulator complex [GO:0090575]	DNA-binding transcription factor activity, RNA polymerase II-specific [GO:0000981]; DNA-binding transcription repressor activity, RNA polymerase II-specific [GO:0001227]; protein dimerization activity [GO:0046983]; RNA polymerase II cis-regulatory region sequence-specific DNA binding [GO:0000978]	18|15	33	16.5	2	3|5|5|5|4|0|2|2|3|5	1	1	1	1	1	6.88	4.85	0	Tan	42 / 716	1.6	4	42	TRUE	IntAct	pubmed:35140242|imex:IM-28767	intact-miscore:0.27
NFIC	BioID	P08651	O75461	Prey	P08651_O75461	E2F6	Transcription factor E2F6 (E2F-6)	E2F6	281	negative regulation of transcription by RNA polymerase II [GO:0000122]; regulation of transcription by RNA polymerase II [GO:0006357]; regulation of transcription involved in G1/S transition of mitotic cell cycle [GO:0000083]	chromatin [GO:0000785]; MLL1 complex [GO:0071339]; nucleoplasm [GO:0005654]; nucleus [GO:0005634]; RNA polymerase II transcription regulator complex [GO:0090575]	DNA-binding transcription factor activity, RNA polymerase II-specific [GO:0000981]; DNA-binding transcription repressor activity, RNA polymerase II-specific [GO:0001227]; protein dimerization activity [GO:0046983]; RNA polymerase II cis-regulatory region sequence-specific DNA binding [GO:0000978]	4|3	7	3.5	2	0|1|0|1|0|0|1|0|1|1|0|0|0|0|0|0|0|0|0|0|0|0|0|0|0|0|2|1|0|0|0|2|0|0|0|0|0|0|0|0|0|1|0|0	0.97	0.99	0.97	0.99	0.97	2.85	14	0.01	Helka	42 / 716	1.6	4	42	TRUE	IntAct	pubmed:35140242|imex:IM-28767	intact-miscore:0.27
NFIC	BioID	P08651	O95785	Prey	P08651_O95785	WIZ	Protein Wiz (Widely-interspaced zinc finger-containing protein) (Zinc finger protein 803)	WIZ ZNF803	1651	positive regulation of nuclear cell cycle DNA replication [GO:0010571]; protein stabilization [GO:0050821]; regulation of transcription by RNA polymerase II [GO:0006357]	extracellular exosome [GO:0070062]; midbody [GO:0030496]; nucleoplasm [GO:0005654]; nucleus [GO:0005634]	DNA-binding transcription factor activity, RNA polymerase II-specific [GO:0000981]; histone methyltransferase binding [GO:1990226]; metal ion binding [GO:0046872]; protein-containing complex binding [GO:0044877]; RNA polymerase II cis-regulatory region sequence-specific DNA binding [GO:0000978]; transcription corepressor binding [GO:0001222]	44|45	89	44.5	2	4|1|1|4|6|0|1|1|2|0	1	1	1	1	1	21.95	22.25	0	Tan	111 / 716	6.9	38	111	TRUE	IntAct	pubmed:35140242|imex:IM-28767	intact-miscore:0.27
NFIC	BioID	P08651	O95785	Prey	P08651_O95785	WIZ	Protein Wiz (Widely-interspaced zinc finger-containing protein) (Zinc finger protein 803)	WIZ ZNF803	1651	positive regulation of nuclear cell cycle DNA replication [GO:0010571]; protein stabilization [GO:0050821]; regulation of transcription by RNA polymerase II [GO:0006357]	extracellular exosome [GO:0070062]; midbody [GO:0030496]; nucleoplasm [GO:0005654]; nucleus [GO:0005634]	DNA-binding transcription factor activity, RNA polymerase II-specific [GO:0000981]; histone methyltransferase binding [GO:1990226]; metal ion binding [GO:0046872]; protein-containing complex binding [GO:0044877]; RNA polymerase II cis-regulatory region sequence-specific DNA binding [GO:0000978]; transcription corepressor binding [GO:0001222]	14|15	29	14.5	2	8|10|3|3|3|5|9|2|10|2|0|0|0|0|0|0|0|0|0|0|0|0|0|0|0|0|11|6|0|0|6|9|0|0|0|0|1|1|0|0|1|4|0|0	0.9	0.91	0.9	0.91	0.9	2.14	6.79	0.02	Helka	111 / 716	6.9	38	111	TRUE	IntAct	pubmed:35140242|imex:IM-28767	intact-miscore:0.27
NFIC	BioID	P08651	P08651	Bait	P08651_P08651	NFIC	Nuclear factor 1 C-type (NF1-C) (Nuclear factor 1/C) (CCAAT-box-binding transcription factor) (CTF) (Nuclear factor I/C) (NF-I/C) (NFI-C) (TGGCA-binding protein)	NFIC NFI	508	DNA replication [GO:0006260]; negative regulation of transcription by RNA polymerase II [GO:0000122]; positive regulation of transcription by RNA polymerase II [GO:0045944]; regulation of transcription by RNA polymerase II [GO:0006357]; transcription by RNA polymerase II [GO:0006366]	chromatin [GO:0000785]; fibrillar center [GO:0001650]; nucleoplasm [GO:0005654]; nucleus [GO:0005634]	DNA-binding transcription activator activity, RNA polymerase II-specific [GO:0001228]; DNA-binding transcription factor activity [GO:0003700]; DNA-binding transcription factor activity, RNA polymerase II-specific [GO:0000981]; RNA polymerase II cis-regulatory region sequence-specific DNA binding [GO:0000978]; sequence-specific double-stranded DNA binding [GO:1990837]	132|152	284	142	2	0|0|1|1|1|2|0|2|0|0	1	1	1	1	1	183.71	202.86	0	Tan	59 / 716	3.1	18	59	TRUE	IntAct	pubmed:25258084|doi:"https://doi.org/10.1126/science.1251033"|imex:IM-24263|pubmed:25258084|doi:"https://doi.org/10.1126/science.1251033"|imex:IM-24263	intact-miscore:0.40|intact-miscore:0.40
NFIC	BioID	P08651	P08651	Bait	P08651_P08651	NFIC	Nuclear factor 1 C-type (NF1-C) (Nuclear factor 1/C) (CCAAT-box-binding transcription factor) (CTF) (Nuclear factor I/C) (NF-I/C) (NFI-C) (TGGCA-binding protein)	NFIC NFI	508	DNA replication [GO:0006260]; negative regulation of transcription by RNA polymerase II [GO:0000122]; positive regulation of transcription by RNA polymerase II [GO:0045944]; regulation of transcription by RNA polymerase II [GO:0006357]; transcription by RNA polymerase II [GO:0006366]	chromatin [GO:0000785]; fibrillar center [GO:0001650]; nucleoplasm [GO:0005654]; nucleus [GO:0005634]	DNA-binding transcription activator activity, RNA polymerase II-specific [GO:0001228]; DNA-binding transcription factor activity [GO:0003700]; DNA-binding transcription factor activity, RNA polymerase II-specific [GO:0000981]; RNA polymerase II cis-regulatory region sequence-specific DNA binding [GO:0000978]; sequence-specific double-stranded DNA binding [GO:1990837]	238|291	529	264.5	2	0|0|0|0|0|0|0|0|0|1|0|0|0|0|0|0|0|0|0|0|0|0|0|0|0|0|1|0|0|0|0|0|0|0|0|0|0|0|0|0|0|0|0|0	1	1	1	1	1	340.37	2645	0	Helka	59 / 716	3.1	18	59	TRUE	IntAct	pubmed:25258084|doi:"https://doi.org/10.1126/science.1251033"|imex:IM-24263|pubmed:25258084|doi:"https://doi.org/10.1126/science.1251033"|imex:IM-24263	intact-miscore:0.40|intact-miscore:0.40
NFIC	BioID	P08651	P0C7T5	Prey	P08651_P0C7T5	ATXN1L	Ataxin-1-like (Brother of ataxin-1) (Brother of ATXN1)	ATXN1L BOAT BOAT1	689	anatomical structure development [GO:0048856]; brain development [GO:0007420]; extracellular matrix organization [GO:0030198]; learning [GO:0007612]; lung alveolus development [GO:0048286]; memory [GO:0007613]; negative regulation of transcription by RNA polymerase II [GO:0000122]; positive regulation of hematopoietic stem cell proliferation [GO:1902035]; regulation of DNA-templated transcription…	dendrite [GO:0030425]; nucleolus [GO:0005730]; nucleoplasm [GO:0005654]; nucleus [GO:0005634]	DNA binding [GO:0003677]; RNA binding [GO:0003723]	2|2	4	2	2	1|0|0|0|0|0|0|0|0|0|0|0|0|0|0|0|1|0|0|0|0|0|0|0|0|0|0|1|0|0|0|0|0|0|0|0|0|0|0|0|0|0|0|0	0.94	0.94	0.94	0.94	0.94	2.76	20	0.02	Helka	/ 716	0		0	TRUE	IntAct	pubmed:35140242|imex:IM-28767	intact-miscore:0.27
NFIC	BioID	P08651	P13056	Prey	P08651_P13056	NR2C1	Nuclear receptor subfamily 2 group C member 1 (Orphan nuclear receptor TR2) (Testicular receptor 2)	NR2C1 TR2	603	anatomical structure development [GO:0048856]; cell differentiation [GO:0030154]; negative regulation of transcription by RNA polymerase II [GO:0000122]; positive regulation of retinoic acid receptor signaling pathway [GO:0048386]	chromatin [GO:0000785]; nucleoplasm [GO:0005654]; PML body [GO:0016605]	DNA binding [GO:0003677]; DNA-binding transcription factor activity, RNA polymerase II-specific [GO:0000981]; DNA-binding transcription repressor activity, RNA polymerase II-specific [GO:0001227]; histone deacetylase binding [GO:0042826]; nuclear receptor activity [GO:0004879]; nuclear steroid receptor activity [GO:0003707]; protein homodimerization activity [GO:0042803]; RNA polymerase II cis-re…	6|6	12	6	2	2|2|0|0|0|0|1|0|0|1|0|0|0|0|0|0|0|0|0|0|0|0|0|0|0|1|0|1|0|0|1|0|0|0|0|0|0|0|0|0|0|0|1|0	1	1	1	1	1	7.93	26.4	0	Helka	71 / 716	2.1	4	71	TRUE	IntAct	pubmed:35140242|imex:IM-28767	intact-miscore:0.27
NFIC	BioID	P08651	P14859	Prey	P08651_P14859	POU2F1	POU domain, class 2, transcription factor 1 (NF-A1) (Octamer-binding protein 1) (Oct-1) (Octamer-binding transcription factor 1) (OTF-1)	POU2F1 OCT1 OTF1	743	negative regulation of DNA-templated transcription [GO:0045892]; positive regulation of miRNA transcription [GO:1902895]; positive regulation of transcription by RNA polymerase II [GO:0045944]; regulation of transcription by RNA polymerase II [GO:0006357]	chromatin [GO:0000785]; endoplasmic reticulum [GO:0005783]; intracellular membrane-bounded organelle [GO:0043231]; nucleoplasm [GO:0005654]; nucleus [GO:0005634]; RNA polymerase II transcription regulator complex [GO:0090575]	DNA binding [GO:0003677]; DNA-binding transcription activator activity, RNA polymerase II-specific [GO:0001228]; DNA-binding transcription factor activity, RNA polymerase II-specific [GO:0000981]; identical protein binding [GO:0042802]; RNA polymerase II cis-regulatory region sequence-specific DNA binding [GO:0000978]; RNA polymerase II core promoter sequence-specific DNA binding [GO:0000979]; se…	2|2	4	2	2	0|0|0|0|0|0|0|0|0|0|0|0|0|0|0|0|0|0|0|0|0|0|0|0|0|0|0|0|0|0|0|0|0|0|0|0|0|0|0|0|0|0|0|0	0.94	0.94	0.94	0.94	0.94	2.76	20	0.02	Helka	8 / 716	1.5	5	8	TRUE	IntAct	pubmed:35140242|imex:IM-28767	intact-miscore:0.27
NFIC	BioID	P08651	P15822	Prey	P08651_P15822	HIVEP1	Zinc finger protein 40 (Cirhin interaction protein) (CIRIP) (Gate keeper of apoptosis-activating protein) (GAAP) (Human immunodeficiency virus type I enhancer-binding protein 1) (HIV-EP1) (Major histocompatibility complex-binding protein 1) (MBP-1) (Positive regulatory domain II-binding factor 1) (PRDII-BF1)	HIVEP1 ZNF40	2718	BMP signaling pathway [GO:0030509]; negative regulation of transcription by RNA polymerase II [GO:0000122]; positive regulation of transcription by RNA polymerase II [GO:0045944]; regulation of transcription by RNA polymerase II [GO:0006357]	cytosol [GO:0005829]; mitochondrion [GO:0005739]; nuclear body [GO:0016604]; nucleoplasm [GO:0005654]; nucleus [GO:0005634]	DNA-binding transcription factor activity, RNA polymerase II-specific [GO:0000981]; DNA-binding transcription repressor activity, RNA polymerase II-specific [GO:0001227]; metal ion binding [GO:0046872]; RNA polymerase II cis-regulatory region sequence-specific DNA binding [GO:0000978]; sequence-specific double-stranded DNA binding [GO:1990837]	39|31	70	35	2	10|12|7|8|9|2|4|4|8|5	1	1	1	1	1	12.43	5.07	0	Tan	64 / 716	4.8	21	64	TRUE	IntAct	pubmed:35140242|imex:IM-28767	intact-miscore:0.27
NFIC	BioID	P08651	P15822	Prey	P08651_P15822	HIVEP1	Zinc finger protein 40 (Cirhin interaction protein) (CIRIP) (Gate keeper of apoptosis-activating protein) (GAAP) (Human immunodeficiency virus type I enhancer-binding protein 1) (HIV-EP1) (Major histocompatibility complex-binding protein 1) (MBP-1) (Positive regulatory domain II-binding factor 1) (PRDII-BF1)	HIVEP1 ZNF40	2718	BMP signaling pathway [GO:0030509]; negative regulation of transcription by RNA polymerase II [GO:0000122]; positive regulation of transcription by RNA polymerase II [GO:0045944]; regulation of transcription by RNA polymerase II [GO:0006357]	cytosol [GO:0005829]; mitochondrion [GO:0005739]; nuclear body [GO:0016604]; nucleoplasm [GO:0005654]; nucleus [GO:0005634]	DNA-binding transcription factor activity, RNA polymerase II-specific [GO:0000981]; DNA-binding transcription repressor activity, RNA polymerase II-specific [GO:0001227]; metal ion binding [GO:0046872]; RNA polymerase II cis-regulatory region sequence-specific DNA binding [GO:0000978]; sequence-specific double-stranded DNA binding [GO:1990837]	11|8	19	9.5	2	1|1|1|1|0|2|2|0|1|1|0|0|0|0|0|0|0|0|0|0|0|0|0|2|0|0|1|1|0|0|1|2|0|0|0|0|0|0|0|0|1|0|0|0	1	1	1	1	1	12.61	23.22	0	Helka	64 / 716	4.8	21	64	TRUE	IntAct	pubmed:35140242|imex:IM-28767	intact-miscore:0.27
NFIC	BioID	P08651	P35711	Prey	P08651_P35711	SOX5	Transcription factor SOX-5	SOX5	763	asymmetric neuroblast division [GO:0055059]; cartilage condensation [GO:0001502]; cartilage development [GO:0051216]; cell fate commitment [GO:0045165]; cellular response to transforming growth factor beta stimulus [GO:0071560]; chondrocyte differentiation [GO:0002062]; positive regulation of cartilage development [GO:0061036]; positive regulation of chondrocyte differentiation [GO:0032332]; posi…	chromatin [GO:0000785]; nucleus [GO:0005634]	DNA-binding transcription factor activity [GO:0003700]; DNA-binding transcription factor activity, RNA polymerase II-specific [GO:0000981]; RNA polymerase II cis-regulatory region sequence-specific DNA binding [GO:0000978]; transcription cis-regulatory region binding [GO:0000976]	2|3	5	2.5	2	0|0|0|0|0|0|0|0|0|0|0|0|1|0|0|0|0|0|0|0|0|0|0|0|0|0|0|0|0|0|0|0|0|0|0|0|0|0|0|0|0|0|0|0	0.97	0.99	0.97	0.99	0.97	2.76	25	0.01	Helka	2 / 716	1	1	2	TRUE	IntAct	pubmed:35140242|imex:IM-28767|pubmed:35140242|imex:IM-28767	intact-miscore:0.47|intact-miscore:0.47
NFIC	BioID	P08651	P48436	Prey	P08651_P48436	SOX9	Transcription factor SOX-9	SOX9	509	anterior head development [GO:0097065]; aortic valve morphogenesis [GO:0003180]; astrocyte fate commitment [GO:0060018]; bone mineralization [GO:0030282]; branching involved in ureteric bud morphogenesis [GO:0001658]; bronchus cartilage development [GO:0060532]; cAMP-mediated signaling [GO:0019933]; canonical Wnt signaling pathway [GO:0060070]; cartilage condensation [GO:0001502]; cartilage devel…	chromatin [GO:0000785]; nucleoplasm [GO:0005654]; nucleus [GO:0005634]; protein-containing complex [GO:0032991]; transcription regulator complex [GO:0005667]	beta-catenin binding [GO:0008013]; bHLH transcription factor binding [GO:0043425]; chromatin binding [GO:0003682]; cis-regulatory region sequence-specific DNA binding [GO:0000987]; DNA-binding transcription activator activity, RNA polymerase II-specific [GO:0001228]; DNA-binding transcription factor activity [GO:0003700]; DNA-binding transcription factor activity, RNA polymerase II-specific [GO:0…	8|8	16	8	2	0|0|0|0|0|0|0|0|0|0	1	1	1	1	1	13.52	80	0	Tan	4 / 716	1	1	4	TRUE	IntAct	pubmed:35140242|imex:IM-28767	intact-miscore:0.40
NFIC	BioID	P08651	P49116	Prey	P08651_P49116	NR2C2	Nuclear receptor subfamily 2 group C member 2 (Orphan nuclear receptor TAK1) (Orphan nuclear receptor TR4) (Testicular receptor 4)	NR2C2 TAK1 TR4	596	anatomical structure development [GO:0048856]; cell differentiation [GO:0030154]; negative regulation of transcription by RNA polymerase II [GO:0000122]; nervous system development [GO:0007399]; positive regulation of embryonic development [GO:0040019]; positive regulation of transcription by RNA polymerase II [GO:0045944]; regulation of DNA-templated transcription [GO:0006355]; spermatogenesis […	chromatin [GO:0000785]; nucleoplasm [GO:0005654]	DNA-binding transcription activator activity, RNA polymerase II-specific [GO:0001228]; DNA-binding transcription factor activity [GO:0003700]; DNA-binding transcription factor activity, RNA polymerase II-specific [GO:0000981]; nuclear receptor activity [GO:0004879]; RNA polymerase II cis-regulatory region sequence-specific DNA binding [GO:0000978]; RNA polymerase II transcription regulatory regio…	9|7	16	8	2	0|0|0|0|0|0|0|0|0|0	1	1	1	1	1	11.94	80	0	Tan	16 / 716	2.5	8	16	TRUE	IntAct	pubmed:35140242|imex:IM-28767	intact-miscore:0.27
NFIC	BioID	P08651	P49116	Prey	P08651_P49116	NR2C2	Nuclear receptor subfamily 2 group C member 2 (Orphan nuclear receptor TAK1) (Orphan nuclear receptor TR4) (Testicular receptor 4)	NR2C2 TAK1 TR4	596	anatomical structure development [GO:0048856]; cell differentiation [GO:0030154]; negative regulation of transcription by RNA polymerase II [GO:0000122]; nervous system development [GO:0007399]; positive regulation of embryonic development [GO:0040019]; positive regulation of transcription by RNA polymerase II [GO:0045944]; regulation of DNA-templated transcription [GO:0006355]; spermatogenesis […	chromatin [GO:0000785]; nucleoplasm [GO:0005654]	DNA-binding transcription activator activity, RNA polymerase II-specific [GO:0001228]; DNA-binding transcription factor activity [GO:0003700]; DNA-binding transcription factor activity, RNA polymerase II-specific [GO:0000981]; nuclear receptor activity [GO:0004879]; RNA polymerase II cis-regulatory region sequence-specific DNA binding [GO:0000978]; RNA polymerase II transcription regulatory regio…	2|3	5	2.5	2	0|0|0|0|0|0|0|0|0|0|0|0|0|1|0|0|0|0|0|0|0|0|0|0|0|0|1|1|0|0|0|0|0|0|0|0|0|0|0|0|0|0|0|0	0.97	0.99	0.97	0.99	0.97	2.76	25	0.01	Helka	16 / 716	2.5	8	16	TRUE	IntAct	pubmed:35140242|imex:IM-28767	intact-miscore:0.27
NFIC	BioID	P08651	P50219	Prey	P08651_P50219	MNX1	Motor neuron and pancreas homeobox protein 1 (Homeobox protein HB9)	MNX1 HLXB9	401	central nervous system development [GO:0007417]; endocrine pancreas development [GO:0031018]; neuron projection morphogenesis [GO:0048812]; spinal cord motor neuron cell fate specification [GO:0021520]	chromatin [GO:0000785]; cytosol [GO:0005829]; nucleolus [GO:0005730]; nucleoplasm [GO:0005654]; nucleus [GO:0005634]	DNA-binding transcription factor activity, RNA polymerase II-specific [GO:0000981]; DNA-binding transcription repressor activity, RNA polymerase II-specific [GO:0001227]; sequence-specific double-stranded DNA binding [GO:1990837]	7|7	14	7	2	2|1|1|2|3|0|0|0|0|1	1	1	1	1	1	5.69	7	0	Tan	6 / 716	1	1	6	TRUE	IntAct	pubmed:35140242|imex:IM-28767	intact-miscore:0.27
NFIC	BioID	P08651	P50219	Prey	P08651_P50219	MNX1	Motor neuron and pancreas homeobox protein 1 (Homeobox protein HB9)	MNX1 HLXB9	401	central nervous system development [GO:0007417]; endocrine pancreas development [GO:0031018]; neuron projection morphogenesis [GO:0048812]; spinal cord motor neuron cell fate specification [GO:0021520]	chromatin [GO:0000785]; cytosol [GO:0005829]; nucleolus [GO:0005730]; nucleoplasm [GO:0005654]; nucleus [GO:0005634]	DNA-binding transcription factor activity, RNA polymerase II-specific [GO:0000981]; DNA-binding transcription repressor activity, RNA polymerase II-specific [GO:0001227]; sequence-specific double-stranded DNA binding [GO:1990837]	2|2	4	2	2	0|0|0|0|0|0|0|0|1|0|0|0|0|0|0|0|0|0|0|0|0|0|0|0|0|0|0|0|0|0|0|0|0|0|0|0|0|0|0|0|0|0|0|0	0.94	0.94	0.94	0.94	0.94	2.76	20	0.02	Helka	6 / 716	1	1	6	TRUE	IntAct	pubmed:35140242|imex:IM-28767	intact-miscore:0.27
NFIC	BioID	P08651	P51531	Prey	P08651_P51531	SMARCA2	Probable global transcription activator SNF2L2 (EC 3.6.4.-) (ATP-dependent helicase SMARCA2) (BRG1-associated factor 190B) (BAF190B) (Protein brahma homolog) (hBRM) (SNF2-alpha) (SWI/SNF-related matrix-associated actin-dependent regulator of chromatin subfamily A member 2)	SMARCA2 BAF190B BRM SNF2A SNF2L2	1590	chromatin remodeling [GO:0006338]; negative regulation of cell differentiation [GO:0045596]; negative regulation of cell growth [GO:0030308]; negative regulation of cell population proliferation [GO:0008285]; negative regulation of DNA-templated transcription [GO:0045892]; negative regulation of transcription by RNA polymerase II [GO:0000122]; nervous system development [GO:0007399]; positive reg…	bBAF complex [GO:0140092]; brahma complex [GO:0035060]; chromatin [GO:0000785]; GBAF complex [GO:0140288]; intermediate filament cytoskeleton [GO:0045111]; intracellular membrane-bounded organelle [GO:0043231]; nBAF complex [GO:0071565]; npBAF complex [GO:0071564]; nucleoplasm [GO:0005654]; nucleus [GO:0005634]; SWI/SNF complex [GO:0016514]	ATP binding [GO:0005524]; ATP-dependent activity, acting on DNA [GO:0008094]; ATP-dependent chromatin remodeler activity [GO:0140658]; chromatin binding [GO:0003682]; DNA binding [GO:0003677]; helicase activity [GO:0004386]; histone binding [GO:0042393]; hydrolase activity [GO:0016787]; transcription cis-regulatory region binding [GO:0000976]; transcription coactivator activity [GO:0003713]	27|23	50	25	2	19|18|19|10|23|14|19|7|20|11|2|0|0|0|0|0|0|0|0|0|0|0|0|0|0|0|0|9|0|0|0|0|0|0|0|0|0|0|0|0|14|13|0|0	0.88	0.91	0.88	0.91	0.88	1.84	5.56	0.03	Helka	145 / 716	5.1	52	145	TRUE	IntAct	pubmed:35140242|imex:IM-28767	intact-miscore:0.27
NFIC	BioID	P08651	P54253	Prey	P08651_P54253	ATXN1	Ataxin-1 (Spinocerebellar ataxia type 1 protein)	ATXN1 ATX1 SCA1	815	brain development [GO:0007420]; learning [GO:0007612]; memory [GO:0007613]; negative regulation of DNA-templated transcription [GO:0045892]; negative regulation of transcription by RNA polymerase II [GO:0000122]; nervous system development [GO:0007399]; nuclear export [GO:0051168]; RNA processing [GO:0006396]; social behavior [GO:0035176]	cytoplasm [GO:0005737]; cytosol [GO:0005829]; nuclear inclusion body [GO:0042405]; nuclear matrix [GO:0016363]; nucleolus [GO:0005730]; nucleoplasm [GO:0005654]; nucleus [GO:0005634]	DNA binding [GO:0003677]; identical protein binding [GO:0042802]; poly(G) binding [GO:0034046]; poly(U) RNA binding [GO:0008266]; protein self-association [GO:0043621]	6|6	12	6	2	1|1|1|0|0|0|0|0|0|0|0|0|0|0|0|0|0|0|0|0|0|0|0|0|0|0|0|1|0|0|0|0|0|0|0|0|0|0|0|0|0|1|0|0	1	1	1	1	1	9.4	52.8	0	Helka	2 / 716	1	1	2	TRUE	IntAct	pubmed:35140242|imex:IM-28767	intact-miscore:0.27
NFIC	BioID	P08651	P55317	Prey	P08651_P55317	FOXA1	Hepatocyte nuclear factor 3-alpha (HNF-3-alpha) (HNF-3A) (Forkhead box protein A1) (Transcription factor 3A) (TCF-3A)	FOXA1 HNF3A TCF3A	472	alveolar secondary septum development [GO:0061144]; anatomical structure formation involved in morphogenesis [GO:0048646]; anatomical structure morphogenesis [GO:0009653]; cell differentiation [GO:0030154]; chromatin remodeling [GO:0006338]; DNA-templated transcription [GO:0006351]; dopaminergic neuron differentiation [GO:0071542]; dorsal/ventral neural tube patterning [GO:0021904]; epithelial ce…	chromatin [GO:0000785]; fibrillar center [GO:0001650]; microvillus [GO:0005902]; nucleoplasm [GO:0005654]; nucleus [GO:0005634]	chromatin binding [GO:0003682]; DNA binding [GO:0003677]; DNA-binding transcription activator activity, RNA polymerase II-specific [GO:0001228]; DNA-binding transcription factor activity [GO:0003700]; DNA-binding transcription factor activity, RNA polymerase II-specific [GO:0000981]; protein domain specific binding [GO:0019904]; RNA polymerase II cis-regulatory region sequence-specific DNA bindin…	2|2	4	2	2	0|0|0|0|0|0|0|0|0|0	0.97	0.97	0.97	0.97	0.97	3.43	20	0.01	Tan	/ 716	0		0	TRUE	IntAct	imex:IM-24178|pubmed:25609649	intact-miscore:0.35
NFIC	BioID	P08651	Q01664	Prey	P08651_Q01664	TFAP4	Transcription factor AP-4 (Activating enhancer-binding protein 4) (Class C basic helix-loop-helix protein 41) (bHLHc41)	TFAP4 BHLHC41	338	cellular response to dexamethasone stimulus [GO:0071549]; DNA damage response, signal transduction by p53 class mediator resulting in transcription of p21 class mediator [GO:0006978]; negative regulation by host of viral transcription [GO:0043922]; negative regulation of cell population proliferation [GO:0008285]; negative regulation of cyclin-dependent protein serine/threonine kinase activity [G…	chromatin [GO:0000785]; mitochondrion [GO:0005739]; nucleoplasm [GO:0005654]; nucleus [GO:0005634]; transcription repressor complex [GO:0017053]	DNA binding [GO:0003677]; DNA-binding transcription activator activity, RNA polymerase II-specific [GO:0001228]; DNA-binding transcription factor activity, RNA polymerase II-specific [GO:0000981]; E-box binding [GO:0070888]; histone deacetylase binding [GO:0042826]; protein homodimerization activity [GO:0042803]; RNA polymerase II cis-regulatory region sequence-specific DNA binding [GO:0000978]; …	15|13	28	14	2	3|0|3|2|2|0|0|0|0|0	1	1	1	1	1	7.61	14	0	Tan	11 / 716	1.5	4	11	TRUE	IntAct	pubmed:35140242|imex:IM-28767	intact-miscore:0.27
NFIC	BioID	P08651	Q01664	Prey	P08651_Q01664	TFAP4	Transcription factor AP-4 (Activating enhancer-binding protein 4) (Class C basic helix-loop-helix protein 41) (bHLHc41)	TFAP4 BHLHC41	338	cellular response to dexamethasone stimulus [GO:0071549]; DNA damage response, signal transduction by p53 class mediator resulting in transcription of p21 class mediator [GO:0006978]; negative regulation by host of viral transcription [GO:0043922]; negative regulation of cell population proliferation [GO:0008285]; negative regulation of cyclin-dependent protein serine/threonine kinase activity [G…	chromatin [GO:0000785]; mitochondrion [GO:0005739]; nucleoplasm [GO:0005654]; nucleus [GO:0005634]; transcription repressor complex [GO:0017053]	DNA binding [GO:0003677]; DNA-binding transcription activator activity, RNA polymerase II-specific [GO:0001228]; DNA-binding transcription factor activity, RNA polymerase II-specific [GO:0000981]; E-box binding [GO:0070888]; histone deacetylase binding [GO:0042826]; protein homodimerization activity [GO:0042803]; RNA polymerase II cis-regulatory region sequence-specific DNA binding [GO:0000978]; …	2|2	4	2	2	0|0|0|0|0|0|0|0|0|0|0|0|0|0|0|0|0|0|0|0|0|0|0|0|0|0|0|0|0|0|0|0|0|0|0|0|0|0|0|0|0|0|0|0	0.94	0.94	0.94	0.94	0.94	2.76	20	0.02	Helka	11 / 716	1.5	4	11	TRUE	IntAct	pubmed:35140242|imex:IM-28767	intact-miscore:0.27
NFIC	BioID	P08651	Q04724	Prey	P08651_Q04724	TLE1	Transducin-like enhancer protein 1 (E(Sp1) homolog) (Enhancer of split groucho-like protein 1) (ESG1)	TLE1	770	animal organ morphogenesis [GO:0009887]; negative regulation of anoikis [GO:2000811]; negative regulation of canonical NF-kappaB signal transduction [GO:0043124]; negative regulation of canonical Wnt signaling pathway [GO:0090090]; negative regulation of DNA-templated transcription [GO:0045892]; negative regulation of Wnt signaling pathway [GO:0030178]; positive regulation of gene expression [GO:…	beta-catenin-TCF complex [GO:1990907]; cytosol [GO:0005829]; nucleoplasm [GO:0005654]; nucleus [GO:0005634]; transcription regulator complex [GO:0005667]	DNA-binding transcription factor binding [GO:0140297]; identical protein binding [GO:0042802]; transcription corepressor activity [GO:0003714]	46|39	85	42.5	2	12|1|11|15|13|5|6|8|2|3	1	1	1	1	1	6.51	5.59	0	Tan	35 / 716	1.6	5	35	TRUE	IntAct	pubmed:35140242|imex:IM-28767	intact-miscore:0.27
NFIC	BioID	P08651	Q04724	Prey	P08651_Q04724	TLE1	Transducin-like enhancer protein 1 (E(Sp1) homolog) (Enhancer of split groucho-like protein 1) (ESG1)	TLE1	770	animal organ morphogenesis [GO:0009887]; negative regulation of anoikis [GO:2000811]; negative regulation of canonical NF-kappaB signal transduction [GO:0043124]; negative regulation of canonical Wnt signaling pathway [GO:0090090]; negative regulation of DNA-templated transcription [GO:0045892]; negative regulation of Wnt signaling pathway [GO:0030178]; positive regulation of gene expression [GO:…	beta-catenin-TCF complex [GO:1990907]; cytosol [GO:0005829]; nucleoplasm [GO:0005654]; nucleus [GO:0005634]; transcription regulator complex [GO:0005667]	DNA-binding transcription factor binding [GO:0140297]; identical protein binding [GO:0042802]; transcription corepressor activity [GO:0003714]	16|18	34	17	2	7|6|4|0|4|0|8|0|9|5|0|0|0|0|0|0|0|0|0|0|0|0|0|0|0|0|1|1|0|0|1|1|0|0|0|0|0|0|0|0|0|0|0|0	0.98	0.99	0.98	0.99	0.98	3.91	15.91	0	Helka	35 / 716	1.6	5	35	TRUE	IntAct	pubmed:35140242|imex:IM-28767	intact-miscore:0.27
NFIC	BioID	P08651	Q04726	Prey	P08651_Q04726	TLE3	Transducin-like enhancer protein 3 (Enhancer of split groucho-like protein 3) (ESG3)	TLE3 KIAA1547	772	animal organ morphogenesis [GO:0009887]; negative regulation of canonical Wnt signaling pathway [GO:0090090]; negative regulation of cold-induced thermogenesis [GO:0120163]; signal transduction [GO:0007165]; Wnt signaling pathway [GO:0016055]	beta-catenin-TCF complex [GO:1990907]; nucleoplasm [GO:0005654]; nucleus [GO:0005634]; transcription regulator complex [GO:0005667]	transcription corepressor activity [GO:0003714]	110|114	224	112	2	35|11|32|38|36|11|21|20|13|11	1	1	1	1	1	9.04	4.91	0	Tan	97 / 716	1.6	7	97	TRUE	IntAct	pubmed:35140242|imex:IM-28767	intact-miscore:0.27
NFIC	BioID	P08651	Q04726	Prey	P08651_Q04726	TLE3	Transducin-like enhancer protein 3 (Enhancer of split groucho-like protein 3) (ESG3)	TLE3 KIAA1547	772	animal organ morphogenesis [GO:0009887]; negative regulation of canonical Wnt signaling pathway [GO:0090090]; negative regulation of cold-induced thermogenesis [GO:0120163]; signal transduction [GO:0007165]; Wnt signaling pathway [GO:0016055]	beta-catenin-TCF complex [GO:1990907]; nucleoplasm [GO:0005654]; nucleus [GO:0005634]; transcription regulator complex [GO:0005667]	transcription corepressor activity [GO:0003714]	30|32	62	31	2	15|13|12|10|8|6|15|10|17|12|3|0|2|2|3|2|3|0|1|2|0|0|2|1|3|1|3|3|4|4|13|8|2|0|4|1|7|6|0|0|10|6|6|7	0.98	0.98	0.98	0.98	0.98	3.72	6.01	0	Helka	97 / 716	1.6	7	97	TRUE	IntAct	pubmed:35140242|imex:IM-28767	intact-miscore:0.27
NFIC	BioID	P08651	Q04837	Prey	P08651_Q04837	SSBP1	Single-stranded DNA-binding protein, mitochondrial (Mt-SSB) (MtSSB) (PWP1-interacting protein 17)	SSBP1 SSBP	148	DNA unwinding involved in DNA replication [GO:0006268]; mitochondrial DNA replication [GO:0006264]; mitochondrion morphogenesis [GO:0070584]; positive regulation of helicase activity [GO:0051096]; positive regulation of mitochondrial DNA replication [GO:0090297]; protein homotetramerization [GO:0051289]	extracellular exosome [GO:0070062]; mitochondrial matrix [GO:0005759]; mitochondrial nucleoid [GO:0042645]; mitochondrion [GO:0005739]; nucleus [GO:0005634]	chromatin binding [GO:0003682]; identical protein binding [GO:0042802]; protein homodimerization activity [GO:0042803]; RNA binding [GO:0003723]; single-stranded DNA binding [GO:0003697]	4|5	9	4.5	2	0|0|0|0|0|0|0|0|0|0|0|0|0|0|0|0|0|0|0|0|0|0|0|0|0|0|0|0|0|0|0|0|0|0|0|0|0|0|0|0|0|0|0|0	1	1	1	1	1	6.34	45	0	Helka	169 / 716	3.4	18	169	TRUE	IntAct	pubmed:35140242|imex:IM-28767	intact-miscore:0.27
NFIC	BioID	P08651	Q12857	Prey	P08651_Q12857	NFIA	Nuclear factor 1 A-type (NF1-A) (Nuclear factor 1/A) (CCAAT-box-binding transcription factor) (CTF) (Nuclear factor I/A) (NF-I/A) (NFI-A) (TGGCA-binding protein)	NFIA KIAA1439	509	BMP signaling pathway [GO:0030509]; cartilage development [GO:0051216]; cell morphogenesis [GO:0000902]; DNA replication [GO:0006260]; exit from mitosis [GO:0010458]; gene expression [GO:0010467]; glial cell fate specification [GO:0021780]; glial cell proliferation [GO:0014009]; limb morphogenesis [GO:0035108]; neural precursor cell proliferation [GO:0061351]; neuron fate specification [GO:004866…	cell junction [GO:0030054]; chromatin [GO:0000785]; nucleoplasm [GO:0005654]; nucleus [GO:0005634]	chromatin binding [GO:0003682]; DNA-binding transcription activator activity, RNA polymerase II-specific [GO:0001228]; DNA-binding transcription factor activity [GO:0003700]; DNA-binding transcription factor activity, RNA polymerase II-specific [GO:0000981]; DNA-binding transcription factor binding [GO:0140297]; RNA polymerase II cis-regulatory region sequence-specific DNA binding [GO:0000978]	51|49	100	50	2	16|2|11|11|17|1|4|5|3|1	1	1	1	1	1	6.17	7.04	0	Tan	71 / 716	2.6	19	71	TRUE	IntAct	pubmed:35140242|imex:IM-28767|pubmed:35140242|imex:IM-28767|pubmed:35140242|imex:IM-28767|pubmed:35140242|imex:IM-28767	intact-miscore:0.42|intact-miscore:0.42|intact-miscore:0.42|intact-miscore:0.42
NFIC	BioID	P08651	Q12857	Prey	P08651_Q12857	NFIA	Nuclear factor 1 A-type (NF1-A) (Nuclear factor 1/A) (CCAAT-box-binding transcription factor) (CTF) (Nuclear factor I/A) (NF-I/A) (NFI-A) (TGGCA-binding protein)	NFIA KIAA1439	509	BMP signaling pathway [GO:0030509]; cartilage development [GO:0051216]; cell morphogenesis [GO:0000902]; DNA replication [GO:0006260]; exit from mitosis [GO:0010458]; gene expression [GO:0010467]; glial cell fate specification [GO:0021780]; glial cell proliferation [GO:0014009]; limb morphogenesis [GO:0035108]; neural precursor cell proliferation [GO:0061351]; neuron fate specification [GO:004866…	cell junction [GO:0030054]; chromatin [GO:0000785]; nucleoplasm [GO:0005654]; nucleus [GO:0005634]	chromatin binding [GO:0003682]; DNA-binding transcription activator activity, RNA polymerase II-specific [GO:0001228]; DNA-binding transcription factor activity [GO:0003700]; DNA-binding transcription factor activity, RNA polymerase II-specific [GO:0000981]; DNA-binding transcription factor binding [GO:0140297]; RNA polymerase II cis-regulatory region sequence-specific DNA binding [GO:0000978]	53|66	119	59.5	2	4|2|3|0|0|0|3|0|3|0|0|0|1|0|0|0|0|0|0|0|0|0|0|0|0|0|1|0|0|3|3|0|0|0|0|0|0|0|0|0|0|1|0|0	1	1	1	1	1	24.85	109.08	0	Helka	71 / 716	2.6	19	71	TRUE	IntAct	pubmed:35140242|imex:IM-28767|pubmed:35140242|imex:IM-28767|pubmed:35140242|imex:IM-28767|pubmed:35140242|imex:IM-28767	intact-miscore:0.42|intact-miscore:0.42|intact-miscore:0.42|intact-miscore:0.42
NFIC	BioID	P08651	Q12948	Prey	P08651_Q12948	FOXC1	Forkhead box protein C1 (Forkhead-related protein FKHL7) (Forkhead-related transcription factor 3) (FREAC-3)	FOXC1 FKHL7 FREAC3	553	anatomical structure morphogenesis [GO:0009653]; angiogenesis [GO:0001525]; apoptotic process involved in outflow tract morphogenesis [GO:0003275]; artery morphogenesis [GO:0048844]; blood vessel diameter maintenance [GO:0097746]; blood vessel remodeling [GO:0001974]; camera-type eye development [GO:0043010]; cardiac muscle cell proliferation [GO:0060038]; cell differentiation [GO:0030154]; cell …	chromatin [GO:0000785]; cytosol [GO:0005829]; heterochromatin [GO:0000792]; nucleoplasm [GO:0005654]; nucleus [GO:0005634]	DNA binding [GO:0003677]; DNA binding, bending [GO:0008301]; DNA-binding transcription activator activity, RNA polymerase II-specific [GO:0001228]; DNA-binding transcription factor activity [GO:0003700]; DNA-binding transcription factor activity, RNA polymerase II-specific [GO:0000981]; DNA-binding transcription factor binding [GO:0140297]; promoter-specific chromatin binding [GO:1990841]; RNA po…	7|7	14	7	2	3|4|0|0|0|0|0|0|0|0|0|0|0|0|0|0|0|0|0|0|0|0|0|0|0|0|1|1|0|0|2|2|0|0|0|0|0|1|0|0|1|0|0|0	0.99	0.99	0.99	0.99	0.99	4.39	20.53	0	Helka	51 / 716	1.2	3	51	TRUE	IntAct	imex:IM-24178|pubmed:25609649|pubmed:35140242|imex:IM-28767	intact-miscore:0.48|intact-miscore:0.48
NFIC	BioID	P08651	Q13129	Prey	P08651_Q13129	RLF	Zinc finger protein Rlf (Rearranged L-myc fusion gene protein) (Zn-15-related protein)	RLF	1914	positive regulation of DNA-templated transcription [GO:0045893]; positive regulation of transcription by RNA polymerase II [GO:0045944]; regulation of DNA methylation [GO:0044030]; regulation of transcription by RNA polymerase II [GO:0006357]	nucleus [GO:0005634]	DNA binding [GO:0003677]; DNA-binding transcription activator activity, RNA polymerase II-specific [GO:0001228]; DNA-binding transcription factor activity, RNA polymerase II-specific [GO:0000981]; metal ion binding [GO:0046872]	8|9	17	8.5	2	0|2|0|0|2|2|1|1|2|2	1	1	1	1	1	5.31	7.08	0	Tan	52 / 716	1.4	5	52	TRUE	IntAct	pubmed:35140242|imex:IM-28767	intact-miscore:0.27
NFIC	BioID	P08651	Q13129	Prey	P08651_Q13129	RLF	Zinc finger protein Rlf (Rearranged L-myc fusion gene protein) (Zn-15-related protein)	RLF	1914	positive regulation of DNA-templated transcription [GO:0045893]; positive regulation of transcription by RNA polymerase II [GO:0045944]; regulation of DNA methylation [GO:0044030]; regulation of transcription by RNA polymerase II [GO:0006357]	nucleus [GO:0005634]	DNA binding [GO:0003677]; DNA-binding transcription activator activity, RNA polymerase II-specific [GO:0001228]; DNA-binding transcription factor activity, RNA polymerase II-specific [GO:0000981]; metal ion binding [GO:0046872]	4|7	11	5.5	2	2|2|0|0|0|0|0|0|3|0|0|0|0|0|1|0|1|0|0|0|0|0|0|0|0|0|0|1|0|0|3|4|0|0|0|0|0|0|0|0|0|0|0|0	0.93	0.98	0.93	0.98	0.93	2.01	14.24	0.02	Helka	52 / 716	1.4	5	52	TRUE	IntAct	pubmed:35140242|imex:IM-28767	intact-miscore:0.27
NFIC	BioID	P08651	Q13227	Prey	P08651_Q13227	GPS2	G protein pathway suppressor 2 (GPS-2)	GPS2	327	B cell differentiation [GO:0030183]; JNK cascade [GO:0007254]; negative regulation of B cell receptor signaling pathway [GO:0050859]; negative regulation of fat cell differentiation [GO:0045599]; negative regulation of inflammatory response [GO:0050728]; negative regulation of JNK cascade [GO:0046329]; negative regulation of protein K63-linked ubiquitination [GO:1900045]; negative regulation of t…	cytosol [GO:0005829]; mitochondrion [GO:0005739]; nucleoplasm [GO:0005654]; nucleus [GO:0005634]; transcription regulator complex [GO:0005667]; transcription repressor complex [GO:0017053]	cyclin binding [GO:0030332]; GTPase inhibitor activity [GO:0005095]; transcription coactivator activity [GO:0003713]; transcription coregulator activity [GO:0003712]; transcription corepressor activity [GO:0003714]	2|2	4	2	2	2|1|1|0|0|0|2|0|1|0|0|0|0|0|0|0|0|0|0|0|0|0|0|0|0|0|0|1|0|0|0|0|0|0|0|0|0|0|0|0|0|0|0|0	0.83	0.83	0.83	0.83	0.83	1.58	11	0.04	Helka	3 / 716	1	1	3	TRUE	IntAct	pubmed:35140242|imex:IM-28767	intact-miscore:0.27
NFIC	BioID	P08651	Q13948	Prey	P08651_Q13948	CUX1	Protein CASP	CUX1 CUTL1	678	intra-Golgi vesicle-mediated transport [GO:0006891]	Golgi apparatus [GO:0005794]; Golgi membrane [GO:0000139]; nucleoplasm [GO:0005654]		9|8	17	8.5	2	0|0|0|0|12|0|0|0|0|0|1|1|0|1|0|0|0|0|0|0|0|0|0|0|0|0|0|0|0|0|0|0|0|0|0|0|0|0|0|0|0|0|1|1	0.97	0.98	0.97	0.98	0.97	3.52	22	0.01	Helka	98 / 716	7.4	28	98	TRUE	IntAct	pubmed:35140242|imex:IM-28767	intact-miscore:0.27
NFIC	BioID	P08651	Q14186	Prey	P08651_Q14186	TFDP1	Transcription factor Dp-1 (DRTF1-polypeptide 1) (DRTF1) (E2F dimerization partner 1)	TFDP1 DP1	410	anoikis [GO:0043276]; epidermis development [GO:0008544]; negative regulation of fat cell proliferation [GO:0070345]; positive regulation of DNA-binding transcription factor activity [GO:0051091]; positive regulation of G1/S transition of mitotic cell cycle [GO:1900087]; positive regulation of transcription by RNA polymerase II [GO:0045944]; regulation of DNA biosynthetic process [GO:2000278]; re…	chromatin [GO:0000785]; cytoplasm [GO:0005737]; cytosol [GO:0005829]; nucleoplasm [GO:0005654]; nucleus [GO:0005634]; Rb-E2F complex [GO:0035189]; RNA polymerase II transcription regulator complex [GO:0090575]	cis-regulatory region sequence-specific DNA binding [GO:0000987]; DNA-binding transcription factor activity [GO:0003700]; DNA-binding transcription factor activity, RNA polymerase II-specific [GO:0000981]; DNA-binding transcription factor binding [GO:0140297]; protein domain specific binding [GO:0019904]	4|11	15	7.5	2	5|3|1|1|1|2|3|3|6|5|1|0|1|0|0|0|0|0|0|0|0|0|0|0|0|0|1|2|1|0|4|2|0|0|0|0|0|0|0|0|1|1|0|1	0.77	0.98	0.77	0.98	0.77	0.23	7.33	0.06	Helka	64 / 716	1.9	5	64	TRUE	IntAct	pubmed:35140242|imex:IM-28767	intact-miscore:0.27
NFIC	BioID	P08651	Q14687	Prey	P08651_Q14687	GSE1	Genetic suppressor element 1	GSE1 KIAA0182	1217				29|30	59	29.5	2	20|20|22|11|25|15|19|13|17|12|2|1|1|1|1|0|0|1|0|0|0|0|0|0|1|1|15|13|3|1|10|9|1|0|2|1|2|2|0|0|12|4|1|2	0.89	0.9	0.89	0.9	0.89	2.05	4.97	0.03	Helka	91 / 716	4.1	19	91	TRUE	IntAct	pubmed:35140242|imex:IM-28767	intact-miscore:0.27
NFIC	BioID	P08651	Q14938	Prey	P08651_Q14938	NFIX	Nuclear factor 1 X-type (NF1-X) (Nuclear factor 1/X) (CCAAT-box-binding transcription factor) (CTF) (Nuclear factor I/X) (NF-I/X) (NFI-X) (TGGCA-binding protein)	NFIX	502	DNA replication [GO:0006260]; negative regulation of transcription by RNA polymerase II [GO:0000122]; positive regulation of transcription by RNA polymerase II [GO:0045944]; regulation of transcription by RNA polymerase II [GO:0006357]; transcription by RNA polymerase II [GO:0006366]	chromatin [GO:0000785]; nucleus [GO:0005634]	DNA-binding transcription factor activity [GO:0003700]; DNA-binding transcription factor activity, RNA polymerase II-specific [GO:0000981]; RNA polymerase II cis-regulatory region sequence-specific DNA binding [GO:0000978]; sequence-specific double-stranded DNA binding [GO:1990837]	4|4	8	4	2	0|0|0|0|0|0|0|0|0|0	1	1	1	1	1	7.02	40	0	Tan	52 / 716	2.3	15	52	TRUE	IntAct	pubmed:35140242|imex:IM-28767|pubmed:35140242|imex:IM-28767|pubmed:35140242|imex:IM-28767|pubmed:35140242|imex:IM-28767	intact-miscore:0.42|intact-miscore:0.42|intact-miscore:0.42|intact-miscore:0.42
NFIC	BioID	P08651	Q14938	Prey	P08651_Q14938	NFIX	Nuclear factor 1 X-type (NF1-X) (Nuclear factor 1/X) (CCAAT-box-binding transcription factor) (CTF) (Nuclear factor I/X) (NF-I/X) (NFI-X) (TGGCA-binding protein)	NFIX	502	DNA replication [GO:0006260]; negative regulation of transcription by RNA polymerase II [GO:0000122]; positive regulation of transcription by RNA polymerase II [GO:0045944]; regulation of transcription by RNA polymerase II [GO:0006357]; transcription by RNA polymerase II [GO:0006366]	chromatin [GO:0000785]; nucleus [GO:0005634]	DNA-binding transcription factor activity [GO:0003700]; DNA-binding transcription factor activity, RNA polymerase II-specific [GO:0000981]; RNA polymerase II cis-regulatory region sequence-specific DNA binding [GO:0000978]; sequence-specific double-stranded DNA binding [GO:1990837]	27|32	59	29.5	2	0|0|0|0|0|0|0|0|0|0|0|0|0|0|0|0|0|0|0|0|0|0|0|0|0|0|0|0|0|0|0|1|0|0|0|0|0|0|0|0|0|0|0|0	1	1	1	1	1	41.21	295	0	Helka	52 / 716	2.3	15	52	TRUE	IntAct	pubmed:35140242|imex:IM-28767|pubmed:35140242|imex:IM-28767|pubmed:35140242|imex:IM-28767|pubmed:35140242|imex:IM-28767	intact-miscore:0.42|intact-miscore:0.42|intact-miscore:0.42|intact-miscore:0.42
NFIC	BioID	P08651	Q15906	Prey	P08651_Q15906	VPS72	Vacuolar protein sorting-associated protein 72 homolog (Protein YL-1) (Transcription factor-like 1)	VPS72 TCFL1 YL1	364	chromatin remodeling [GO:0006338]; negative regulation of transcription by RNA polymerase II [GO:0000122]; positive regulation of DNA-templated transcription [GO:0045893]; positive regulation of double-strand break repair via homologous recombination [GO:1905168]; regulation of apoptotic process [GO:0042981]; regulation of cell cycle [GO:0051726]; regulation of DNA-templated transcription [GO:000…	NuA4 histone acetyltransferase complex [GO:0035267]; nuclear speck [GO:0016607]; nucleoplasm [GO:0005654]; nucleosome [GO:0000786]; nucleus [GO:0005634]; protein-containing complex [GO:0032991]	ATP-dependent H2AZ histone chaperone activity [GO:0140849]; DNA binding [GO:0003677]; histone binding [GO:0042393]; histone chaperone activity [GO:0140713]	3|3	6	3	2	2|1|0|0|2|0|0|0|1|0|0|0|0|0|0|0|0|0|0|0|0|0|0|0|0|0|1|2|0|0|0|2|0|0|0|0|0|0|0|0|1|2|0|0	0.86	0.86	0.86	0.86	0.86	1.84	9.43	0.03	Helka	16 / 716	1.6	5	16	TRUE	IntAct	pubmed:35140242|imex:IM-28767	intact-miscore:0.27
NFIC	BioID	P08651	Q4LE39	Prey	P08651_Q4LE39	ARID4B	AT-rich interactive domain-containing protein 4B (ARID domain-containing protein 4B) (180 kDa Sin3-associated polypeptide) (Sin3-associated polypeptide p180) (Breast cancer-associated antigen BRCAA1) (Histone deacetylase complex subunit SAP180) (Retinoblastoma-binding protein 1-like 1)	ARID4B BRCAA1 RBBP1L1 RBP1L1 SAP180	1312	DNA methylation [GO:0006306]; establishment of Sertoli cell barrier [GO:0097368]; negative regulation of cell migration [GO:0030336]; negative regulation of stem cell population maintenance [GO:1902455]; negative regulation of transcription by RNA polymerase II [GO:0000122]; negative regulation of transforming growth factor beta receptor signaling pathway [GO:0030512]; positive regulation of stem…	cytosol [GO:0005829]; mitochondrion [GO:0005739]; nucleoplasm [GO:0005654]; nucleus [GO:0005634]; Sin3 complex [GO:0016580]	transcription cis-regulatory region binding [GO:0000976]	7|7	14	7	2	3|4|3|0|1|1|1|0|1|1|3|2|2|1|0|3|2|0|1|1|2|2|2|2|0|0|2|1|2|1|3|4|0|0|2|0|0|0|0|0|2|3|1|1	0.98	0.98	0.98	0.98	0.98	4.11	5.13	0	Helka	41 / 716	1.8	5	41	TRUE	IntAct	pubmed:35140242|imex:IM-28767	intact-miscore:0.27
NFIC	BioID	P08651	Q5PSV4	Prey	P08651_Q5PSV4	BRMS1L	Breast cancer metastasis-suppressor 1-like protein (BRMS1-homolog protein p40) (BRMS1-like protein p40)	BRMS1L	323	negative regulation of cell migration [GO:0030336]; negative regulation of stem cell population maintenance [GO:1902455]; negative regulation of transcription by RNA polymerase II [GO:0000122]; negative regulation of transforming growth factor beta receptor signaling pathway [GO:0030512]; positive regulation of stem cell population maintenance [GO:1902459]	nucleus [GO:0005634]; Sin3 complex [GO:0016580]; Sin3-type complex [GO:0070822]	histone deacetylase binding [GO:0042826]	7|7	14	7	2	2|5|2|1|2|5|1|0|1|1|0|0|0|0|0|0|1|0|0|0|0|0|0|0|0|0|2|4|0|0|0|0|0|0|1|1|1|1|0|0|3|5|2|2	0.9	0.9	0.9	0.9	0.9	2.23	7.16	0.02	Helka	26 / 716	2.9	9	26	TRUE	IntAct	pubmed:35140242|imex:IM-28767	intact-miscore:0.27
NFIC	BioID	P08651	Q5VZL5	Prey	P08651_Q5VZL5	ZMYM4	Zinc finger MYM-type protein 4 (Zinc finger protein 262)	ZMYM4 KIAA0425 ZNF262	1548	cytoskeleton organization [GO:0007010]; regulation of cell morphogenesis [GO:0022604]		DNA binding [GO:0003677]; zinc ion binding [GO:0008270]	27|31	58	29	2	5|6|3|4|9|1|4|5|8|10	1	1	1	1	1	11.51	5.27	0	Tan	93 / 716	6	20	93	TRUE	IntAct	pubmed:35140242|imex:IM-28767	intact-miscore:0.27
NFIC	BioID	P08651	Q5VZL5	Prey	P08651_Q5VZL5	ZMYM4	Zinc finger MYM-type protein 4 (Zinc finger protein 262)	ZMYM4 KIAA0425 ZNF262	1548	cytoskeleton organization [GO:0007010]; regulation of cell morphogenesis [GO:0022604]		DNA binding [GO:0003677]; zinc ion binding [GO:0008270]	14|13	27	13.5	2	4|3|8|3|8|1|5|0|4|0|0|0|0|0|0|1|1|0|0|0|0|0|0|0|0|0|7|10|1|1|12|16|1|1|5|4|0|2|0|0|10|8|2|3	0.82	0.84	0.82	0.84	0.82	1.41	4.91	0.04	Helka	93 / 716	6	20	93	TRUE	IntAct	pubmed:35140242|imex:IM-28767	intact-miscore:0.27
NFIC	BioID	P08651	Q6N021	Prey	P08651_Q6N021	TET2	Methylcytosine dioxygenase TET2 (EC 1.14.11.80)	TET2 KIAA1546 Nbla00191	2002	5-methylcytosine catabolic process [GO:0006211]; cell cycle [GO:0007049]; chromatin organization [GO:0006325]; DNA demethylation [GO:0080111]; leukocyte differentiation [GO:0002521]; myeloid cell differentiation [GO:0030099]; positive regulation of transcription by RNA polymerase II [GO:0045944]; protein O-linked glycosylation [GO:0006493]; response to organic cyclic compound [GO:0014070]	chromosome [GO:0005694]; nucleoplasm [GO:0005654]; nucleus [GO:0005634]	DNA binding [GO:0003677]; ferrous iron binding [GO:0008198]; methylcytosine dioxygenase activity [GO:0070579]; zinc ion binding [GO:0008270]	2|4	6	3	2	1|0|0|0|0|0|0|0|2|0|0|0|0|0|0|0|0|0|0|0|0|0|0|0|0|0|1|0|0|0|0|1|0|0|0|0|0|0|0|0|1|0|0|0	0.95	1	0.95	1	0.95	2.22	22	0.01	Helka	16 / 716	4.7	13	16	TRUE	IntAct	pubmed:35140242|imex:IM-28767	intact-miscore:0.27
NFIC	BioID	P08651	Q6PJG2	Prey	P08651_Q6PJG2	MIDEAS	Mitotic deacetylase-associated SANT domain protein (ELM2 and SANT domain-containing protein 1)	MIDEAS C14orf117 C14orf43 ELMSAN1	1045	negative regulation of DNA-templated transcription [GO:0045892]; regulation of transcription by RNA polymerase II [GO:0006357]	histone deacetylase complex [GO:0000118]; nucleoplasm [GO:0005654]; transcription regulator complex [GO:0005667]	DNA binding [GO:0003677]; transcription corepressor activity [GO:0003714]	5|6	11	5.5	2	0|0|0|0|0|0|0|0|0|0|0|1|0|0|1|0|1|0|3|1|1|2|1|1|0|0|0|0|0|0|0|0|0|0|0|0|0|0|0|0|0|0|0|0	0.99	1	0.99	1	0.99	4.6	20.17	0	Helka	43 / 716	2.1	10	43	TRUE	IntAct	pubmed:35140242|imex:IM-28767	intact-miscore:0.27
NFIC	BioID	P08651	Q6W2J9	Prey	P08651_Q6W2J9	BCOR	BCL-6 corepressor (BCoR)	BCOR KIAA1575	1755	blastocyst hatching [GO:0001835]; chromatin remodeling [GO:0006338]; heart development [GO:0007507]; negative regulation of bone mineralization [GO:0030502]; negative regulation of DNA-templated transcription [GO:0045892]; negative regulation of tooth mineralization [GO:0070171]; negative regulation of transcription by RNA polymerase II [GO:0000122]; odontogenesis [GO:0042476]; roof of mouth deve…	BCOR complex [GO:0140261]; nucleoplasm [GO:0005654]; nucleus [GO:0005634]	DNA-binding transcription factor binding [GO:0140297]; heat shock protein binding [GO:0031072]; histone deacetylase binding [GO:0042826]; RNA polymerase II transcription regulatory region sequence-specific DNA binding [GO:0000977]; transcription cis-regulatory region binding [GO:0000976]; transcription corepressor activity [GO:0003714]	206|185	391	195.5	2	50|21|57|59|72|11|25|27|21|25	1	1	1	1	1	7.8	5.31	0	Tan	94 / 716	7.7	25	94	TRUE	IntAct	pubmed:35140242|imex:IM-28767	intact-miscore:0.27
NFIC	BioID	P08651	Q6W2J9	Prey	P08651_Q6W2J9	BCOR	BCL-6 corepressor (BCoR)	BCOR KIAA1575	1755	blastocyst hatching [GO:0001835]; chromatin remodeling [GO:0006338]; heart development [GO:0007507]; negative regulation of bone mineralization [GO:0030502]; negative regulation of DNA-templated transcription [GO:0045892]; negative regulation of tooth mineralization [GO:0070171]; negative regulation of transcription by RNA polymerase II [GO:0000122]; odontogenesis [GO:0042476]; roof of mouth deve…	BCOR complex [GO:0140261]; nucleoplasm [GO:0005654]; nucleus [GO:0005634]	DNA-binding transcription factor binding [GO:0140297]; heat shock protein binding [GO:0031072]; histone deacetylase binding [GO:0042826]; RNA polymerase II transcription regulatory region sequence-specific DNA binding [GO:0000977]; transcription cis-regulatory region binding [GO:0000976]; transcription corepressor activity [GO:0003714]	64|69	133	66.5	2	32|31|21|10|29|12|29|11|29|18|11|7|10|7|3|4|7|2|3|3|1|4|0|1|0|4|40|35|7|8|16|31|1|3|6|5|5|7|0|0|20|16|4|5	0.98	0.98	0.98	0.98	0.98	3.52	5.88	0.01	Helka	94 / 716	7.7	25	94	TRUE	IntAct	pubmed:35140242|imex:IM-28767	intact-miscore:0.27
NFIC	BioID	P08651	Q6ZW49	Prey	P08651_Q6ZW49	PAXIP1	PAX-interacting protein 1 (PAX transactivation activation domain-interacting protein)	PAXIP1 PAXIP1L PTIP CAGF28	1069	adipose tissue development [GO:0060612]; chorion development [GO:0060717]; chromatin remodeling [GO:0006338]; DNA damage response, signal transduction by p53 class mediator [GO:0030330]; DNA recombination [GO:0006310]; DNA repair [GO:0006281]; endothelial cell migration [GO:0043542]; negative regulation of DNA-binding transcription factor activity [GO:0043433]; positive regulation of isotype swit…	chromosome [GO:0005694]; histone methyltransferase complex [GO:0035097]; MLL3/4 complex [GO:0044666]; nuclear matrix [GO:0016363]; nucleoplasm [GO:0005654]; nucleus [GO:0005634]		6|5	11	5.5	2	4|2|6|2|3|2|4|2|3|2|0|0|0|0|0|0|0|0|0|0|0|0|0|0|0|0|2|3|0|0|0|3|0|0|0|0|0|0|0|0|2|0|0|0	0.79	0.84	0.79	0.84	0.79	1.06	6.05	0.05	Helka	17 / 716	1.2	3	17	TRUE	IntAct	pubmed:35140242|imex:IM-28767	intact-miscore:0.27
NFIC	BioID	P08651	Q7Z3K3	Prey	P08651_Q7Z3K3	POGZ	Pogo transposable element with ZNF domain (Suppressor of hairy wing homolog 5) (Zinc finger protein 280E) (Zinc finger protein 635)	POGZ KIAA0461 SUHW5 ZNF280E ZNF635 Nbla00003	1410	cell division [GO:0051301]; double-strand break repair via homologous recombination [GO:0000724]; kinetochore assembly [GO:0051382]; mitotic sister chromatid cohesion [GO:0007064]; positive regulation of transcription by RNA polymerase II [GO:0045944]	chromatin [GO:0000785]; cytoplasm [GO:0005737]; cytosol [GO:0005829]; nucleoplasm [GO:0005654]; nucleus [GO:0005634]	DNA binding [GO:0003677]; metal ion binding [GO:0046872]	28|34	62	31	2	4|10|3|6|3|4|5|3|8|6	1	1	1	1	1	21.02	5.96	0	Tan	95 / 716	5.2	21	95	TRUE	IntAct	pubmed:35140242|imex:IM-28767	intact-miscore:0.27
NFIC	BioID	P08651	Q7Z3K3	Prey	P08651_Q7Z3K3	POGZ	Pogo transposable element with ZNF domain (Suppressor of hairy wing homolog 5) (Zinc finger protein 280E) (Zinc finger protein 635)	POGZ KIAA0461 SUHW5 ZNF280E ZNF635 Nbla00003	1410	cell division [GO:0051301]; double-strand break repair via homologous recombination [GO:0000724]; kinetochore assembly [GO:0051382]; mitotic sister chromatid cohesion [GO:0007064]; positive regulation of transcription by RNA polymerase II [GO:0045944]	chromatin [GO:0000785]; cytoplasm [GO:0005737]; cytosol [GO:0005829]; nucleoplasm [GO:0005654]; nucleus [GO:0005634]	DNA binding [GO:0003677]; metal ion binding [GO:0046872]	6|4	10	5	2	1|1|2|0|2|0|0|0|1|2|1|1|1|1|0|0|0|0|0|0|0|0|0|0|0|0|2|4|1|0|0|1|0|0|0|0|0|0|0|0|2|2|0|0	0.92	0.98	0.92	0.98	0.92	1.77	8.8	0.02	Helka	95 / 716	5.2	21	95	TRUE	IntAct	pubmed:35140242|imex:IM-28767	intact-miscore:0.27
NFIC	BioID	P08651	Q8IVH2	Prey	P08651_Q8IVH2	FOXP4	Forkhead box protein P4 (Fork head-related protein-like A)	FOXP4 FKHLA	680	regulation of transcription by RNA polymerase II [GO:0006357]	chromatin [GO:0000785]; nucleus [GO:0005634]	DNA-binding transcription factor activity, RNA polymerase II-specific [GO:0000981]; DNA-binding transcription repressor activity, RNA polymerase II-specific [GO:0001227]; metal ion binding [GO:0046872]; RNA polymerase II cis-regulatory region sequence-specific DNA binding [GO:0000978]	5|5	10	5	2	0|0|0|1|0|0|0|0|0|0	1	1	1	1	1	15.21	50	0	Tan	6 / 716	1.8	4	6	TRUE	IntAct	pubmed:35140242|imex:IM-28767	intact-miscore:0.27
NFIC	BioID	P08651	Q8IVH2	Prey	P08651_Q8IVH2	FOXP4	Forkhead box protein P4 (Fork head-related protein-like A)	FOXP4 FKHLA	680	regulation of transcription by RNA polymerase II [GO:0006357]	chromatin [GO:0000785]; nucleus [GO:0005634]	DNA-binding transcription factor activity, RNA polymerase II-specific [GO:0000981]; DNA-binding transcription repressor activity, RNA polymerase II-specific [GO:0001227]; metal ion binding [GO:0046872]; RNA polymerase II cis-regulatory region sequence-specific DNA binding [GO:0000978]	6|12	18	9	2	0|1|0|0|0|0|0|0|0|0|0|0|0|0|0|0|0|0|0|0|0|0|0|0|0|0|1|0|0|0|2|0|0|0|0|0|0|0|0|0|0|0|0|0	1	1	1	1	1	8.82	90	0	Helka	6 / 716	1.8	4	6	TRUE	IntAct	pubmed:35140242|imex:IM-28767	intact-miscore:0.27
NFIC	BioID	P08651	Q8IVW6	Prey	P08651_Q8IVW6	ARID3B	AT-rich interactive domain-containing protein 3B (ARID domain-containing protein 3B) (Bright and dead ringer protein) (Bright-like protein)	ARID3B BDP DRIL2	561	positive regulation of transcription by RNA polymerase II [GO:0045944]; regulation of transcription by RNA polymerase II [GO:0006357]	nucleoplasm [GO:0005654]; nucleus [GO:0005634]	DNA binding [GO:0003677]	64|67	131	65.5	2	10|8|13|10|13|0|0|1|6|11	1	1	1	1	1	11.64	9.1	0	Tan	92 / 716	9	44	92	TRUE	IntAct	pubmed:35140242|imex:IM-28767	intact-miscore:0.27
NFIC	BioID	P08651	Q8IVW6	Prey	P08651_Q8IVW6	ARID3B	AT-rich interactive domain-containing protein 3B (ARID domain-containing protein 3B) (Bright and dead ringer protein) (Bright-like protein)	ARID3B BDP DRIL2	561	positive regulation of transcription by RNA polymerase II [GO:0045944]; regulation of transcription by RNA polymerase II [GO:0006357]	nucleoplasm [GO:0005654]; nucleus [GO:0005634]	DNA binding [GO:0003677]	29|32	61	30.5	2	17|17|14|9|20|7|17|10|18|11|1|1|0|1|2|3|4|0|1|2|2|1|0|1|2|4|12|10|7|3|9|9|0|1|1|3|4|8|0|0|18|16|2|3	0.93	0.94	0.93	0.94	0.93	2.34	4.95	0.02	Helka	92 / 716	9	44	92	TRUE	IntAct	pubmed:35140242|imex:IM-28767	intact-miscore:0.27
NFIC	BioID	P08651	Q8IWI9	Prey	P08651_Q8IWI9	MGA	MAX gene-associated protein (MAX dimerization protein 5)	MGA KIAA0518 MAD5	3065	cell fate specification [GO:0001708]; positive regulation of DNA-templated transcription [GO:0045893]; regulation of transcription by RNA polymerase II [GO:0006357]	chromatin [GO:0000785]; MLL1 complex [GO:0071339]; nucleoplasm [GO:0005654]	DNA-binding transcription factor activity, RNA polymerase II-specific [GO:0000981]; protein dimerization activity [GO:0046983]; RNA polymerase II cis-regulatory region sequence-specific DNA binding [GO:0000978]	57|62	119	59.5	2	10|19|9|11|10|3|8|3|22|19	1	1	1	1	1	7.61	5.22	0	Tan	124 / 716	6.6	45	124	TRUE	IntAct	pubmed:35140242|imex:IM-28767	intact-miscore:0.27
NFIC	BioID	P08651	Q8IWI9	Prey	P08651_Q8IWI9	MGA	MAX gene-associated protein (MAX dimerization protein 5)	MGA KIAA0518 MAD5	3065	cell fate specification [GO:0001708]; positive regulation of DNA-templated transcription [GO:0045893]; regulation of transcription by RNA polymerase II [GO:0006357]	chromatin [GO:0000785]; MLL1 complex [GO:0071339]; nucleoplasm [GO:0005654]	DNA-binding transcription factor activity, RNA polymerase II-specific [GO:0000981]; protein dimerization activity [GO:0046983]; RNA polymerase II cis-regulatory region sequence-specific DNA binding [GO:0000978]	19|14	33	16.5	2	2|1|4|0|4|0|2|0|2|0|1|2|2|1|1|0|1|0|1|1|0|0|0|0|0|0|11|10|0|1|8|11|0|0|0|2|0|3|0|0|4|8|0|0	0.95	0.97	0.95	0.97	0.95	2.45	8.75	0.01	Helka	124 / 716	6.6	45	124	TRUE	IntAct	pubmed:35140242|imex:IM-28767	intact-miscore:0.27
NFIC	BioID	P08651	Q8IX15	Prey	P08651_Q8IX15	HOMEZ	Homeobox and leucine zipper protein Homez (Homeodomain leucine zipper-containing factor)	HOMEZ KIAA1443	550	regulation of transcription by RNA polymerase II [GO:0006357]	chromatin [GO:0000785]; cytosol [GO:0005829]; nucleolus [GO:0005730]; nucleoplasm [GO:0005654]; nucleus [GO:0005634]	DNA binding [GO:0003677]; DNA-binding transcription factor activity, RNA polymerase II-specific [GO:0000981]	9|10	19	9.5	2	3|1|3|4|2|0|0|0|2|1	1	1	1	1	1	4.91	5.94	0	Tan	/ 716	0		0	TRUE	IntAct	pubmed:35140242|imex:IM-28767	intact-miscore:0.27
NFIC	BioID	P08651	Q8IX15	Prey	P08651_Q8IX15	HOMEZ	Homeobox and leucine zipper protein Homez (Homeodomain leucine zipper-containing factor)	HOMEZ KIAA1443	550	regulation of transcription by RNA polymerase II [GO:0006357]	chromatin [GO:0000785]; cytosol [GO:0005829]; nucleolus [GO:0005730]; nucleoplasm [GO:0005654]; nucleus [GO:0005634]	DNA binding [GO:0003677]; DNA-binding transcription factor activity, RNA polymerase II-specific [GO:0000981]	3|2	5	2.5	2	0|0|0|0|0|0|0|1|1|2|0|0|0|0|0|0|0|0|0|0|0|0|0|0|0|0|0|0|0|0|0|0|0|0|0|0|0|0|0|0|0|0|0|0	0.96	0.99	0.96	0.99	0.96	2.68	25	0.01	Helka	/ 716	0		0	TRUE	IntAct	pubmed:35140242|imex:IM-28767	intact-miscore:0.27
NFIC	BioID	P08651	Q8NFD5	Prey	P08651_Q8NFD5	ARID1B	AT-rich interactive domain-containing protein 1B (ARID domain-containing protein 1B) (BRG1-associated factor 250b) (BAF250B) (BRG1-binding protein hELD/OSA1) (Osa homolog 2) (hOsa2) (p250R)	ARID1B BAF250B DAN15 KIAA1235 OSA2	2319	cellular response to angiotensin [GO:1904385]; chromatin remodeling [GO:0006338]; nervous system development [GO:0007399]; positive regulation of cell differentiation [GO:0045597]; positive regulation of DNA-templated transcription [GO:0045893]; positive regulation of double-strand break repair [GO:2000781]; positive regulation of myoblast differentiation [GO:0045663]; positive regulation of T ce…	bBAF complex [GO:0140092]; brahma complex [GO:0035060]; chromatin [GO:0000785]; cytosol [GO:0005829]; nBAF complex [GO:0071565]; npBAF complex [GO:0071564]; nucleoplasm [GO:0005654]; plasma membrane [GO:0005886]; SWI/SNF complex [GO:0016514]	DNA binding [GO:0003677]; transcription coactivator activity [GO:0003713]	79|95	174	87	2	13|13|12|11|15|6|13|11|14|16	1	1	1	1	1	52.19	7.02	0	Tan	68 / 716	3.1	22	68	TRUE	IntAct	pubmed:35140242|imex:IM-28767	intact-miscore:0.27
NFIC	BioID	P08651	Q8NFD5	Prey	P08651_Q8NFD5	ARID1B	AT-rich interactive domain-containing protein 1B (ARID domain-containing protein 1B) (BRG1-associated factor 250b) (BAF250B) (BRG1-binding protein hELD/OSA1) (Osa homolog 2) (hOsa2) (p250R)	ARID1B BAF250B DAN15 KIAA1235 OSA2	2319	cellular response to angiotensin [GO:1904385]; chromatin remodeling [GO:0006338]; nervous system development [GO:0007399]; positive regulation of cell differentiation [GO:0045597]; positive regulation of DNA-templated transcription [GO:0045893]; positive regulation of double-strand break repair [GO:2000781]; positive regulation of myoblast differentiation [GO:0045663]; positive regulation of T ce…	bBAF complex [GO:0140092]; brahma complex [GO:0035060]; chromatin [GO:0000785]; cytosol [GO:0005829]; nBAF complex [GO:0071565]; npBAF complex [GO:0071564]; nucleoplasm [GO:0005654]; plasma membrane [GO:0005886]; SWI/SNF complex [GO:0016514]	DNA binding [GO:0003677]; transcription coactivator activity [GO:0003713]	25|23	48	24	2	12|14|5|3|10|4|9|2|9|3|0|0|0|0|0|0|1|0|0|0|0|0|0|0|1|0|12|19|0|2|4|8|0|0|1|0|0|0|0|0|1|1|0|0	0.96	0.96	0.96	0.96	0.96	2.97	8.73	0.01	Helka	68 / 716	3.1	22	68	TRUE	IntAct	pubmed:35140242|imex:IM-28767	intact-miscore:0.27
NFIC	BioID	P08651	Q8NHM5	Prey	P08651_Q8NHM5	KDM2B	Lysine-specific demethylase 2B (EC 1.14.11.27) (CXXC-type zinc finger protein 2) (F-box and leucine-rich repeat protein 10) (F-box protein FBL10) (F-box/LRR-repeat protein 10) (JmjC domain-containing histone demethylation protein 1B) (Jumonji domain-containing EMSY-interactor methyltransferase motif protein) (Protein JEMMA) (Protein-containing CXXC domain 2) ([Histone-H3]-lysine-36 demethylase 1B)	KDM2B CXXC2 FBL10 FBXL10 JHDM1B NDY1 PCCX2	1336	chromatin remodeling [GO:0006338]; embryonic camera-type eye morphogenesis [GO:0048596]; forebrain development [GO:0030900]; fourth ventricle development [GO:0021592]; hindbrain development [GO:0030902]; initiation of neural tube closure [GO:0021993]; lateral ventricle development [GO:0021670]; midbrain development [GO:0030901]; midbrain-hindbrain boundary morphogenesis [GO:0021555]; negative reg…	chromosome [GO:0005694]; nucleolus [GO:0005730]; nucleoplasm [GO:0005654]; nucleus [GO:0005634]; PcG protein complex [GO:0031519]	DNA binding [GO:0003677]; histone demethylase activity [GO:0032452]; histone H3K36 demethylase activity [GO:0051864]; histone H3K36me/H3K36me2 demethylase activity [GO:0140680]; RNA polymerase II cis-regulatory region sequence-specific DNA binding [GO:0000978]; rRNA binding [GO:0019843]; transcription coregulator activity [GO:0003712]; unmethylated CpG binding [GO:0045322]; zinc ion binding [GO:0…	31|38	69	34.5	2	14|4|7|8|10|0|6|3|4|4	1	1	1	1	1	6.51	5.75	0	Tan	23 / 716	1.5	4	23	TRUE	IntAct	pubmed:35140242|imex:IM-28767	intact-miscore:0.27
NFIC	BioID	P08651	Q8NHM5	Prey	P08651_Q8NHM5	KDM2B	Lysine-specific demethylase 2B (EC 1.14.11.27) (CXXC-type zinc finger protein 2) (F-box and leucine-rich repeat protein 10) (F-box protein FBL10) (F-box/LRR-repeat protein 10) (JmjC domain-containing histone demethylation protein 1B) (Jumonji domain-containing EMSY-interactor methyltransferase motif protein) (Protein JEMMA) (Protein-containing CXXC domain 2) ([Histone-H3]-lysine-36 demethylase 1B)	KDM2B CXXC2 FBL10 FBXL10 JHDM1B NDY1 PCCX2	1336	chromatin remodeling [GO:0006338]; embryonic camera-type eye morphogenesis [GO:0048596]; forebrain development [GO:0030900]; fourth ventricle development [GO:0021592]; hindbrain development [GO:0030902]; initiation of neural tube closure [GO:0021993]; lateral ventricle development [GO:0021670]; midbrain development [GO:0030901]; midbrain-hindbrain boundary morphogenesis [GO:0021555]; negative reg…	chromosome [GO:0005694]; nucleolus [GO:0005730]; nucleoplasm [GO:0005654]; nucleus [GO:0005634]; PcG protein complex [GO:0031519]	DNA binding [GO:0003677]; histone demethylase activity [GO:0032452]; histone H3K36 demethylase activity [GO:0051864]; histone H3K36me/H3K36me2 demethylase activity [GO:0140680]; RNA polymerase II cis-regulatory region sequence-specific DNA binding [GO:0000978]; rRNA binding [GO:0019843]; transcription coregulator activity [GO:0003712]; unmethylated CpG binding [GO:0045322]; zinc ion binding [GO:0…	20|22	42	21	2	1|3|1|0|4|2|2|2|4|2|0|0|0|0|0|0|1|0|0|1|1|0|0|0|0|0|5|5|0|0|0|0|0|0|0|0|0|0|0|0|2|1|0|0	1	1	1	1	1	8.89	24.97	0	Helka	23 / 716	1.5	4	23	TRUE	IntAct	pubmed:35140242|imex:IM-28767	intact-miscore:0.27
NFIC	BioID	P08651	Q8TE76	Prey	P08651_Q8TE76	MORC4	MORC family CW-type zinc finger protein 4 (Zinc finger CW-type coiled-coil domain protein 2) (Zinc finger CW-type domain protein 4)	MORC4 ZCW4 ZCWCC2	937		nucleoplasm [GO:0005654]; nucleus [GO:0005634]	ATP hydrolysis activity [GO:0016887]; methylated histone binding [GO:0035064]; zinc ion binding [GO:0008270]	37|40	77	38.5	2	8|0|5|7|9|0|0|2|0|1	1	1	1	1	1	7.45	12.03	0	Tan	5 / 716	1	1	5	TRUE	IntAct	pubmed:35140242|imex:IM-28767	intact-miscore:0.27
NFIC	BioID	P08651	Q8TE76	Prey	P08651_Q8TE76	MORC4	MORC family CW-type zinc finger protein 4 (Zinc finger CW-type coiled-coil domain protein 2) (Zinc finger CW-type domain protein 4)	MORC4 ZCW4 ZCWCC2	937		nucleoplasm [GO:0005654]; nucleus [GO:0005634]	ATP hydrolysis activity [GO:0016887]; methylated histone binding [GO:0035064]; zinc ion binding [GO:0008270]	2|4	6	3	2	0|0|0|0|0|0|0|0|0|0|0|0|0|0|0|0|0|0|0|0|0|0|0|0|0|0|0|0|0|0|0|0|0|0|0|0|0|0|1|0|0|0|0|0	0.97	1	0.97	1	0.97	2.76	30	0.01	Helka	5 / 716	1	1	5	TRUE	IntAct	pubmed:35140242|imex:IM-28767	intact-miscore:0.27
NFIC	BioID	P08651	Q8WUZ0	Prey	P08651_Q8WUZ0	BCL7C	B-cell CLL/lymphoma 7 protein family member C	BCL7C	217	apoptotic process [GO:0006915]; chromatin remodeling [GO:0006338]; negative regulation of cell differentiation [GO:0045596]; positive regulation of cell population proliferation [GO:0008284]; positive regulation of double-strand break repair [GO:2000781]; positive regulation of stem cell population maintenance [GO:1902459]; regulation of G0 to G1 transition [GO:0070316]; regulation of G1/S transi…	chromatin [GO:0000785]; GBAF complex [GO:0140288]; SWI/SNF complex [GO:0016514]		5|3	8	4	2	1|0|0|0|0|0|1|0|0|0|0|0|0|0|0|0|0|0|0|0|0|0|0|0|0|0|1|2|0|0|0|0|0|0|0|0|0|0|0|0|0|0|0|0	0.99	1	0.99	1	0.99	4.11	35.2	0	Helka	58 / 716	1.6	4	58	TRUE	IntAct	pubmed:35140242|imex:IM-28767	intact-miscore:0.27
NFIC	BioID	P08651	Q92766	Prey	P08651_Q92766	RREB1	Ras-responsive element-binding protein 1 (RREB-1) (Finger protein in nuclear bodies) (Raf-responsive zinc finger protein LZ321) (Zinc finger motif enhancer-binding protein 1) (Zep-1)	RREB1 FINB	1687	negative regulation of transcription by RNA polymerase II [GO:0000122]; positive regulation of brown fat cell differentiation [GO:0090336]; positive regulation of DNA-templated transcription [GO:0045893]; positive regulation of epithelial cell migration [GO:0010634]; positive regulation of lamellipodium morphogenesis [GO:2000394]; positive regulation of mammary gland epithelial cell proliferation…	cytoplasm [GO:0005737]; extracellular exosome [GO:0070062]; fibrillar center [GO:0001650]; nuclear body [GO:0016604]; nuclear speck [GO:0016607]; nucleus [GO:0005634]	DNA-binding transcription activator activity, RNA polymerase II-specific [GO:0001228]; metal ion binding [GO:0046872]; RNA polymerase II cis-regulatory region sequence-specific DNA binding [GO:0000978]; RNA polymerase II transcription regulatory region sequence-specific DNA binding [GO:0000977]	17|16	33	16.5	2	1|1|0|0|0|0|0|2|1|1	1	1	1	1	1	19.67	27.5	0	Tan	63 / 716	2.7	12	63	TRUE	IntAct	pubmed:35140242|imex:IM-28767	intact-miscore:0.27
NFIC	BioID	P08651	Q92766	Prey	P08651_Q92766	RREB1	Ras-responsive element-binding protein 1 (RREB-1) (Finger protein in nuclear bodies) (Raf-responsive zinc finger protein LZ321) (Zinc finger motif enhancer-binding protein 1) (Zep-1)	RREB1 FINB	1687	negative regulation of transcription by RNA polymerase II [GO:0000122]; positive regulation of brown fat cell differentiation [GO:0090336]; positive regulation of DNA-templated transcription [GO:0045893]; positive regulation of epithelial cell migration [GO:0010634]; positive regulation of lamellipodium morphogenesis [GO:2000394]; positive regulation of mammary gland epithelial cell proliferation…	cytoplasm [GO:0005737]; extracellular exosome [GO:0070062]; fibrillar center [GO:0001650]; nuclear body [GO:0016604]; nuclear speck [GO:0016607]; nucleus [GO:0005634]	DNA-binding transcription activator activity, RNA polymerase II-specific [GO:0001228]; metal ion binding [GO:0046872]; RNA polymerase II cis-regulatory region sequence-specific DNA binding [GO:0000978]; RNA polymerase II transcription regulatory region sequence-specific DNA binding [GO:0000977]	2|2	4	2	2	0|1|1|0|0|0|0|0|0|0|0|0|0|0|0|1|0|0|0|0|0|0|0|0|0|0|0|0|0|0|0|0|0|0|0|0|0|0|0|0|1|0|0|0	0.94	0.94	0.94	0.94	0.94	2.76	20	0.02	Helka	63 / 716	2.7	12	63	TRUE	IntAct	pubmed:35140242|imex:IM-28767	intact-miscore:0.27
NFIC	BioID	P08651	Q92785	Prey	P08651_Q92785	DPF2	Zinc finger protein ubi-d4 (Apoptosis response zinc finger protein) (BRG1-associated factor 45D) (BAF45D) (D4, zinc and double PHD fingers family 2) (Protein requiem)	DPF2 BAF45D REQ UBID4	391	apoptotic process [GO:0006915]; apoptotic signaling pathway [GO:0097190]; chromatin remodeling [GO:0006338]; negative regulation of myeloid progenitor cell differentiation [GO:1905454]; negative regulation of transcription by RNA polymerase II [GO:0000122]; nervous system development [GO:0007399]; positive regulation of double-strand break repair [GO:2000781]; positive regulation of stem cell pop…	centrosome [GO:0005813]; chromatin [GO:0000785]; cytosol [GO:0005829]; intracellular membrane-bounded organelle [GO:0043231]; nBAF complex [GO:0071565]; nucleoplasm [GO:0005654]; nucleus [GO:0005634]; SWI/SNF complex [GO:0016514]	H3K9me3 modified histone binding [GO:0062072]; lysine-acetylated histone binding [GO:0070577]; metal ion binding [GO:0046872]; transcription corepressor activity [GO:0003714]	45|51	96	48	2	14|12|15|16|15|4|12|16|18|16	1	1	1	1	1	14.12	3.48	0	Tan	44 / 716	2	6	44	TRUE	IntAct	pubmed:35140242|imex:IM-28767	intact-miscore:0.27
NFIC	BioID	P08651	Q92785	Prey	P08651_Q92785	DPF2	Zinc finger protein ubi-d4 (Apoptosis response zinc finger protein) (BRG1-associated factor 45D) (BAF45D) (D4, zinc and double PHD fingers family 2) (Protein requiem)	DPF2 BAF45D REQ UBID4	391	apoptotic process [GO:0006915]; apoptotic signaling pathway [GO:0097190]; chromatin remodeling [GO:0006338]; negative regulation of myeloid progenitor cell differentiation [GO:1905454]; negative regulation of transcription by RNA polymerase II [GO:0000122]; nervous system development [GO:0007399]; positive regulation of double-strand break repair [GO:2000781]; positive regulation of stem cell pop…	centrosome [GO:0005813]; chromatin [GO:0000785]; cytosol [GO:0005829]; intracellular membrane-bounded organelle [GO:0043231]; nBAF complex [GO:0071565]; nucleoplasm [GO:0005654]; nucleus [GO:0005634]; SWI/SNF complex [GO:0016514]	H3K9me3 modified histone binding [GO:0062072]; lysine-acetylated histone binding [GO:0070577]; metal ion binding [GO:0046872]; transcription corepressor activity [GO:0003714]	13|19	32	16	2	9|7|7|3|10|4|8|3|8|3|1|1|0|1|0|0|1|0|1|0|0|0|2|1|0|1|5|5|2|5|8|8|0|0|4|4|1|1|0|0|8|8|1|1	0.89	0.97	0.89	0.97	0.89	1.51	5.33	0.03	Helka	44 / 716	2	6	44	TRUE	IntAct	pubmed:35140242|imex:IM-28767	intact-miscore:0.27
NFIC	BioID	P08651	Q92925	Prey	P08651_Q92925	SMARCD2	SWI/SNF-related matrix-associated actin-dependent regulator of chromatin subfamily D member 2 (60 kDa BRG-1/Brm-associated factor subunit B) (BRG1-associated factor 60B) (BAF60B)	SMARCD2 BAF60B PRO2451	531	chromatin remodeling [GO:0006338]; nucleosome disassembly [GO:0006337]; positive regulation of cell differentiation [GO:0045597]; positive regulation of double-strand break repair [GO:2000781]; positive regulation of myoblast differentiation [GO:0045663]; positive regulation of T cell differentiation [GO:0045582]; regulation of G0 to G1 transition [GO:0070316]; regulation of G1/S transition of mi…	bBAF complex [GO:0140092]; brahma complex [GO:0035060]; chromatin [GO:0000785]; kinetochore [GO:0000776]; nuclear matrix [GO:0016363]; nucleoplasm [GO:0005654]; nucleus [GO:0005634]; protein-containing complex [GO:0032991]; RSC-type complex [GO:0016586]; SWI/SNF complex [GO:0016514]	transcription coactivator activity [GO:0003713]; transcription coregulator activity [GO:0003712]	50|52	102	51	2	14|9|16|18|11|3|7|7|6|11	1	1	1	1	1	12.02	5	0	Tan	65 / 716	1.8	8	65	TRUE	IntAct	pubmed:35140242|imex:IM-28767	intact-miscore:0.27
NFIC	BioID	P08651	Q92925	Prey	P08651_Q92925	SMARCD2	SWI/SNF-related matrix-associated actin-dependent regulator of chromatin subfamily D member 2 (60 kDa BRG-1/Brm-associated factor subunit B) (BRG1-associated factor 60B) (BAF60B)	SMARCD2 BAF60B PRO2451	531	chromatin remodeling [GO:0006338]; nucleosome disassembly [GO:0006337]; positive regulation of cell differentiation [GO:0045597]; positive regulation of double-strand break repair [GO:2000781]; positive regulation of myoblast differentiation [GO:0045663]; positive regulation of T cell differentiation [GO:0045582]; regulation of G0 to G1 transition [GO:0070316]; regulation of G1/S transition of mi…	bBAF complex [GO:0140092]; brahma complex [GO:0035060]; chromatin [GO:0000785]; kinetochore [GO:0000776]; nuclear matrix [GO:0016363]; nucleoplasm [GO:0005654]; nucleus [GO:0005634]; protein-containing complex [GO:0032991]; RSC-type complex [GO:0016586]; SWI/SNF complex [GO:0016514]	transcription coactivator activity [GO:0003713]; transcription coregulator activity [GO:0003712]	18|17	35	17.5	2	8|8|7|6|5|5|6|0|4|6|2|1|1|2|2|2|1|0|1|2|1|1|1|1|1|0|5|9|2|2|4|6|0|1|3|0|2|2|0|0|8|8|4|3	0.98	0.98	0.98	0.98	0.98	3.74	5.79	0	Helka	65 / 716	1.8	8	65	TRUE	IntAct	pubmed:35140242|imex:IM-28767	intact-miscore:0.27
NFIC	BioID	P08651	Q969R5	Prey	P08651_Q969R5	L3MBTL2	Lethal(3)malignant brain tumor-like protein 2 (H-l(3)mbt-like protein 2) (L(3)mbt-like protein 2)	L3MBTL2	705	chromatin organization [GO:0006325]; negative regulation of DNA-templated transcription [GO:0045892]	nucleoplasm [GO:0005654]; nucleus [GO:0005634]	chromatin binding [GO:0003682]; histone binding [GO:0042393]; methylated histone binding [GO:0035064]; zinc ion binding [GO:0008270]	11|17	28	14	2	5|4|3|4|4|0|2|0|2|4	1	1	1	1	1	4.92	5	0	Tan	8 / 716	1.6	3	8	TRUE	IntAct	pubmed:35140242|imex:IM-28767	intact-miscore:0.27
NFIC	BioID	P08651	Q969R5	Prey	P08651_Q969R5	L3MBTL2	Lethal(3)malignant brain tumor-like protein 2 (H-l(3)mbt-like protein 2) (L(3)mbt-like protein 2)	L3MBTL2	705	chromatin organization [GO:0006325]; negative regulation of DNA-templated transcription [GO:0045892]	nucleoplasm [GO:0005654]; nucleus [GO:0005634]	chromatin binding [GO:0003682]; histone binding [GO:0042393]; methylated histone binding [GO:0035064]; zinc ion binding [GO:0008270]	4|4	8	4	2	0|0|0|0|0|0|0|0|0|0|0|0|0|0|0|0|0|0|0|0|0|0|0|0|0|0|1|2|0|0|0|0|0|0|0|0|0|0|0|0|0|0|0|0	1	1	1	1	1	7.51	40	0	Helka	8 / 716	1.6	3	8	TRUE	IntAct	pubmed:35140242|imex:IM-28767	intact-miscore:0.27
NFIC	BioID	P08651	Q96GM5	Prey	P08651_Q96GM5	SMARCD1	SWI/SNF-related matrix-associated actin-dependent regulator of chromatin subfamily D member 1 (60 kDa BRG-1/Brm-associated factor subunit A) (BRG1-associated factor 60A) (BAF60A) (SWI/SNF complex 60 kDa subunit)	SMARCD1 BAF60A	515	cellular response to fatty acid [GO:0071398]; chromatin remodeling [GO:0006338]; negative regulation of cell differentiation [GO:0045596]; nervous system development [GO:0007399]; nucleosome disassembly [GO:0006337]; positive regulation of cell differentiation [GO:0045597]; positive regulation of cell population proliferation [GO:0008284]; positive regulation of double-strand break repair [GO:200…	brahma complex [GO:0035060]; chromatin [GO:0000785]; GBAF complex [GO:0140288]; intracellular membrane-bounded organelle [GO:0043231]; kinetochore [GO:0000776]; nBAF complex [GO:0071565]; npBAF complex [GO:0071564]; nuclear matrix [GO:0016363]; nucleoplasm [GO:0005654]; nucleus [GO:0005634]; RSC-type complex [GO:0016586]; SWI/SNF complex [GO:0016514]	chromatin binding [GO:0003682]; molecular adaptor activity [GO:0060090]; signaling receptor binding [GO:0005102]; transcription coactivator activity [GO:0003713]; transcription coregulator activity [GO:0003712]	24|18	42	21	2	9|13|10|6|13|8|9|3|10|5|0|0|0|0|2|0|2|0|0|2|0|1|0|0|0|0|5|7|3|3|9|10|1|2|3|5|0|2|0|0|10|9|3|3	0.92	0.97	0.92	0.97	0.92	1.99	5.5	0.02	Helka	60 / 716	2.3	8	60	TRUE	IntAct	pubmed:35140242|imex:IM-28767	intact-miscore:0.27
NFIC	BioID	P08651	Q96KQ7	Prey	P08651_Q96KQ7	EHMT2	Histone-lysine N-methyltransferase EHMT2 (EC 2.1.1.-) (EC 2.1.1.367) (Euchromatic histone-lysine N-methyltransferase 2) (HLA-B-associated transcript 8) (Histone H3-K9 methyltransferase 3) (H3-K9-HMTase 3) (Lysine N-methyltransferase 1C) (Protein G9a)	EHMT2 BAT8 C6orf30 G9A KMT1C NG36	1210	behavioral response to cocaine [GO:0048148]; cellular response to cocaine [GO:0071314]; cellular response to starvation [GO:0009267]; cellular response to xenobiotic stimulus [GO:0071466]; DNA methylation [GO:0006306]; DNA methylation on cytosine within a CG sequence [GO:0010424]; fertilization [GO:0009566]; histone lysine methylation [GO:0034968]; long-term memory [GO:0007616]; negative regulati…	chromatin [GO:0000785]; nuclear speck [GO:0016607]; nucleoplasm [GO:0005654]; nucleus [GO:0005634]	C2H2 zinc finger domain binding [GO:0070742]; histone H3K27 methyltransferase activity [GO:0046976]; histone H3K56 methyltransferase activity [GO:0140759]; histone H3K9 methyltransferase activity [GO:0046974]; histone H3K9me2 methyltransferase activity [GO:0140947]; p53 binding [GO:0002039]; promoter-specific chromatin binding [GO:1990841]; protein-lysine N-methyltransferase activity [GO:0016279]…	31|34	65	32.5	2	8|8|5|3|13|0|6|4|7|6	1	1	1	1	1	8.81	5.42	0	Tan	39 / 716	2.7	8	39	TRUE	IntAct	pubmed:35140242|imex:IM-28767	intact-miscore:0.27
NFIC	BioID	P08651	Q96KQ7	Prey	P08651_Q96KQ7	EHMT2	Histone-lysine N-methyltransferase EHMT2 (EC 2.1.1.-) (EC 2.1.1.367) (Euchromatic histone-lysine N-methyltransferase 2) (HLA-B-associated transcript 8) (Histone H3-K9 methyltransferase 3) (H3-K9-HMTase 3) (Lysine N-methyltransferase 1C) (Protein G9a)	EHMT2 BAT8 C6orf30 G9A KMT1C NG36	1210	behavioral response to cocaine [GO:0048148]; cellular response to cocaine [GO:0071314]; cellular response to starvation [GO:0009267]; cellular response to xenobiotic stimulus [GO:0071466]; DNA methylation [GO:0006306]; DNA methylation on cytosine within a CG sequence [GO:0010424]; fertilization [GO:0009566]; histone lysine methylation [GO:0034968]; long-term memory [GO:0007616]; negative regulati…	chromatin [GO:0000785]; nuclear speck [GO:0016607]; nucleoplasm [GO:0005654]; nucleus [GO:0005634]	C2H2 zinc finger domain binding [GO:0070742]; histone H3K27 methyltransferase activity [GO:0046976]; histone H3K56 methyltransferase activity [GO:0140759]; histone H3K9 methyltransferase activity [GO:0046974]; histone H3K9me2 methyltransferase activity [GO:0140947]; p53 binding [GO:0002039]; promoter-specific chromatin binding [GO:1990841]; protein-lysine N-methyltransferase activity [GO:0016279]…	8|11	19	9.5	2	3|3|2|0|0|3|2|1|6|4|0|0|0|0|0|0|1|0|0|0|0|0|1|1|0|1|9|8|0|0|1|3|0|0|0|0|0|0|0|0|0|2|0|0	0.9	0.94	0.9	0.94	0.9	1.79	8.2	0.03	Helka	39 / 716	2.7	8	39	TRUE	IntAct	pubmed:35140242|imex:IM-28767	intact-miscore:0.27
NFIC	BioID	P08651	Q96RK0	Prey	P08651_Q96RK0	CIC	Protein capicua homolog	CIC KIAA0306	1608	brain development [GO:0007420]; learning [GO:0007612]; memory [GO:0007613]; negative regulation of DNA-templated transcription [GO:0045892]; regulation of transcription by RNA polymerase II [GO:0006357]; social behavior [GO:0035176]	chromatin [GO:0000785]; intracellular membrane-bounded organelle [GO:0043231]; nucleoplasm [GO:0005654]; nucleus [GO:0005634]	DNA-binding transcription factor activity, RNA polymerase II-specific [GO:0000981]; RNA polymerase II transcription regulatory region sequence-specific DNA binding [GO:0000977]	31|34	65	32.5	2	13|9|7|5|9|4|13|3|10|7|1|0|0|0|2|1|0|1|0|0|0|0|0|1|0|2|13|15|2|1|5|5|0|0|3|2|0|2|0|0|8|3|1|0	0.99	0.99	0.99	0.99	0.99	4.4	9.66	0	Helka	101 / 716	9.2	38	101	TRUE	IntAct	pubmed:35140242|imex:IM-28767	intact-miscore:0.27
NFIC	BioID	P08651	Q99856	Prey	P08651_Q99856	ARID3A	AT-rich interactive domain-containing protein 3A (ARID domain-containing protein 3A) (B-cell regulator of IgH transcription) (Bright) (Dead ringer-like protein 1) (E2F-binding protein 1)	ARID3A DRIL1 DRIL3 DRX E2FBP1	593	positive regulation of transcription by RNA polymerase II [GO:0045944]; regulation of transcription by RNA polymerase II [GO:0006357]	cytosol [GO:0005829]; membrane raft [GO:0045121]; nucleoplasm [GO:0005654]; nucleus [GO:0005634]	chromatin binding [GO:0003682]; DNA binding [GO:0003677]; identical protein binding [GO:0042802]; transcription coregulator activity [GO:0003712]	63|63	126	63	2	3|4|3|5|4|0|0|1|3|2	1	1	1	1	1	81.56	25.2	0	Tan	72 / 716	3.7	17	72	TRUE	IntAct	pubmed:35140242|imex:IM-28767	intact-miscore:0.27
NFIC	BioID	P08651	Q99856	Prey	P08651_Q99856	ARID3A	AT-rich interactive domain-containing protein 3A (ARID domain-containing protein 3A) (B-cell regulator of IgH transcription) (Bright) (Dead ringer-like protein 1) (E2F-binding protein 1)	ARID3A DRIL1 DRIL3 DRX E2FBP1	593	positive regulation of transcription by RNA polymerase II [GO:0045944]; regulation of transcription by RNA polymerase II [GO:0006357]	cytosol [GO:0005829]; membrane raft [GO:0045121]; nucleoplasm [GO:0005654]; nucleus [GO:0005634]	chromatin binding [GO:0003682]; DNA binding [GO:0003677]; identical protein binding [GO:0042802]; transcription coregulator activity [GO:0003712]	21|25	46	23	2	12|11|6|6|13|11|6|5|7|6|1|1|0|0|1|0|1|0|1|1|1|1|1|2|2|1|6|5|2|1|6|4|0|0|1|2|0|0|0|0|10|5|2|0	0.97	0.98	0.97	0.98	0.97	3.15	7.18	0.01	Helka	72 / 716	3.7	17	72	TRUE	IntAct	pubmed:35140242|imex:IM-28767	intact-miscore:0.27
NFIC	BioID	P08651	Q9BSM1	Prey	P08651_Q9BSM1	PCGF1	Polycomb group RING finger protein 1 (Nervous system Polycomb-1) (NSPc1) (RING finger protein 68)	PCGF1 NSPC1 RNF68	259	chromatin remodeling [GO:0006338]; negative regulation of transcription by RNA polymerase II [GO:0000122]; regulation of DNA-templated transcription [GO:0006355]	nucleoplasm [GO:0005654]; nucleus [GO:0005634]; PcG protein complex [GO:0031519]; PRC1 complex [GO:0035102]	metal ion binding [GO:0046872]; promoter-specific chromatin binding [GO:1990841]	19|19	38	19	2	5|3|4|3|7|1|4|2|3|2	1	1	1	1	1	11.17	5.59	0	Tan	11 / 716	1	1	11	TRUE	IntAct	pubmed:35140242|imex:IM-28767	intact-miscore:0.27
NFIC	BioID	P08651	Q9BSM1	Prey	P08651_Q9BSM1	PCGF1	Polycomb group RING finger protein 1 (Nervous system Polycomb-1) (NSPc1) (RING finger protein 68)	PCGF1 NSPC1 RNF68	259	chromatin remodeling [GO:0006338]; negative regulation of transcription by RNA polymerase II [GO:0000122]; regulation of DNA-templated transcription [GO:0006355]	nucleoplasm [GO:0005654]; nucleus [GO:0005634]; PcG protein complex [GO:0031519]; PRC1 complex [GO:0035102]	metal ion binding [GO:0046872]; promoter-specific chromatin binding [GO:1990841]	6|5	11	5.5	2	3|1|1|1|1|1|1|2|3|0|1|0|0|0|1|1|1|0|1|0|0|0|0|0|0|1|1|1|1|0|1|1|0|0|0|0|0|1|0|0|0|2|0|0	0.97	0.99	0.97	0.99	0.97	3.12	8.64	0.01	Helka	11 / 716	1	1	11	TRUE	IntAct	pubmed:35140242|imex:IM-28767	intact-miscore:0.27
NFIC	BioID	P08651	Q9BZK7	Prey	P08651_Q9BZK7	TBL1XR1	F-box-like/WD repeat-containing protein TBL1XR1 (Nuclear receptor corepressor/HDAC3 complex subunit TBLR1) (TBL1-related protein 1) (Transducin beta-like 1X-related protein 1)	TBL1XR1 IRA1 TBLR1	514	blastocyst hatching [GO:0001835]; chromatin organization [GO:0006325]; fat pad development [GO:0060613]; lipid catabolic process [GO:0016042]; multicellular organism growth [GO:0035264]; negative regulation of transcription by RNA polymerase II [GO:0000122]; positive regulation of canonical Wnt signaling pathway [GO:0090263]; positive regulation of DNA-templated transcription [GO:0045893]; positi…	histone deacetylase complex [GO:0000118]; mitotic spindle [GO:0072686]; nucleoplasm [GO:0005654]; nucleus [GO:0005634]; transcription repressor complex [GO:0017053]	beta-catenin binding [GO:0008013]; histone binding [GO:0042393]; transcription cis-regulatory region binding [GO:0000976]; transcription corepressor activity [GO:0003714]	32|35	67	33.5	2	18|20|19|8|23|9|20|7|21|16|6|6|9|7|11|7|10|3|3|6|5|6|0|2|5|8|4|2|8|8|13|14|5|4|7|7|9|8|0|0|15|15|9|11	0.84	0.92	0.84	0.92	0.84	1.17	3.74	0.04	Helka	45 / 716	1.2	2	45	TRUE	IntAct	pubmed:35140242|imex:IM-28767	intact-miscore:0.27
NFIC	BioID	P08651	Q9C005	Prey	P08651_Q9C005	DPY30	Protein dpy-30 homolog (Dpy-30-like protein) (Dpy-30L)	DPY30	99	endosomal transport [GO:0016197]; transcription initiation-coupled chromatin remodeling [GO:0045815]	Golgi apparatus [GO:0005794]; histone methyltransferase complex [GO:0035097]; MLL1 complex [GO:0071339]; MLL1/2 complex [GO:0044665]; MLL3/4 complex [GO:0044666]; nucleoplasm [GO:0005654]; nucleus [GO:0005634]; Set1C/COMPASS complex [GO:0048188]; trans-Golgi network [GO:0005802]	identical protein binding [GO:0042802]; protein homodimerization activity [GO:0042803]	21|23	44	22	2	8|8|6|5|6|4|6|4|7|4|5|3|2|3|5|5|4|4|3|3|4|3|4|3|0|0|4|4|2|1|2|2|1|0|0|0|5|5|0|0|3|2|0|0	1	1	1	1	1	8.9	6.91	0	Helka	169 / 716	2.8	11	169	TRUE	IntAct	pubmed:35140242|imex:IM-28767	intact-miscore:0.27
NFIC	BioID	P08651	Q9H0E3	Prey	P08651_Q9H0E3	SAP130	Histone deacetylase complex subunit SAP130 (130 kDa Sin3-associated polypeptide) (Sin3-associated polypeptide p130)	SAP130	1048	negative regulation of cell migration [GO:0030336]; negative regulation of stem cell population maintenance [GO:1902455]; negative regulation of transcription by RNA polymerase II [GO:0000122]; negative regulation of transforming growth factor beta receptor signaling pathway [GO:0030512]; positive regulation of stem cell population maintenance [GO:1902459]	nuclear speck [GO:0016607]; nucleus [GO:0005634]; Sin3 complex [GO:0016580]; Sin3-type complex [GO:0070822]		29|28	57	28.5	2	10|10|6|6|9|3|4|4|11|9	1	1	1	1	1	11.49	3.96	0	Tan	80 / 716	3.3	18	80	TRUE	IntAct	pubmed:35140242|imex:IM-28767	intact-miscore:0.27
NFIC	BioID	P08651	Q9H0E3	Prey	P08651_Q9H0E3	SAP130	Histone deacetylase complex subunit SAP130 (130 kDa Sin3-associated polypeptide) (Sin3-associated polypeptide p130)	SAP130	1048	negative regulation of cell migration [GO:0030336]; negative regulation of stem cell population maintenance [GO:1902455]; negative regulation of transcription by RNA polymerase II [GO:0000122]; negative regulation of transforming growth factor beta receptor signaling pathway [GO:0030512]; positive regulation of stem cell population maintenance [GO:1902459]	nuclear speck [GO:0016607]; nucleus [GO:0005634]; Sin3 complex [GO:0016580]; Sin3-type complex [GO:0070822]		8|8	16	8	2	4|3|7|2|7|3|3|1|3|3|2|1|2|1|1|1|2|0|0|1|2|3|1|3|0|0|5|4|2|3|5|3|0|1|0|0|1|1|0|0|4|3|1|3	0.8	0.8	0.8	0.8	0.8	1.38	3.83	0.05	Helka	80 / 716	3.3	18	80	TRUE	IntAct	pubmed:35140242|imex:IM-28767	intact-miscore:0.27
NFIC	BioID	P08651	Q9H334	Prey	P08651_Q9H334	FOXP1	Forkhead box protein P1 (Mac-1-regulated forkhead) (MFH)	FOXP1 HSPC215	677	cellular response to tumor necrosis factor [GO:0071356]; DNA damage response [GO:0006974]; endothelial cell activation [GO:0042118]; macrophage activation [GO:0042116]; monocyte activation [GO:0042117]; negative regulation of androgen receptor signaling pathway [GO:0060766]; negative regulation of B cell apoptotic process [GO:0002903]; negative regulation of cell growth involved in cardiac muscle…	chromatin [GO:0000785]; nucleoplasm [GO:0005654]; nucleus [GO:0005634]	core promoter sequence-specific DNA binding [GO:0001046]; DNA-binding transcription factor activity, RNA polymerase II-specific [GO:0000981]; DNA-binding transcription repressor activity, RNA polymerase II-specific [GO:0001227]; identical protein binding [GO:0042802]; metal ion binding [GO:0046872]; nuclear androgen receptor binding [GO:0050681]; protein self-association [GO:0043621]; RNA polymer…	9|7	16	8	2	0|0|1|0|0|0|0|0|0|0	1	1	1	1	1	23.55	80	0	Tan	6 / 716	1.2	2	6	TRUE	IntAct	pubmed:35140242|imex:IM-28767	intact-miscore:0.27
NFIC	BioID	P08651	Q9H334	Prey	P08651_Q9H334	FOXP1	Forkhead box protein P1 (Mac-1-regulated forkhead) (MFH)	FOXP1 HSPC215	677	cellular response to tumor necrosis factor [GO:0071356]; DNA damage response [GO:0006974]; endothelial cell activation [GO:0042118]; macrophage activation [GO:0042116]; monocyte activation [GO:0042117]; negative regulation of androgen receptor signaling pathway [GO:0060766]; negative regulation of B cell apoptotic process [GO:0002903]; negative regulation of cell growth involved in cardiac muscle…	chromatin [GO:0000785]; nucleoplasm [GO:0005654]; nucleus [GO:0005634]	core promoter sequence-specific DNA binding [GO:0001046]; DNA-binding transcription factor activity, RNA polymerase II-specific [GO:0000981]; DNA-binding transcription repressor activity, RNA polymerase II-specific [GO:0001227]; identical protein binding [GO:0042802]; metal ion binding [GO:0046872]; nuclear androgen receptor binding [GO:0050681]; protein self-association [GO:0043621]; RNA polymer…	6|10	16	8	2	1|2|0|0|0|0|1|0|0|0|0|0|0|0|0|0|0|0|0|0|0|0|0|0|0|0|1|2|0|0|2|1|0|0|0|0|0|0|0|0|0|0|0|0	1	1	1	1	1	6.23	35.2	0	Helka	6 / 716	1.2	2	6	TRUE	IntAct	pubmed:35140242|imex:IM-28767	intact-miscore:0.27
NFIC	BioID	P08651	Q9H582	Prey	P08651_Q9H582	ZNF644	Zinc finger protein 644 (Zinc finger motif enhancer-binding protein 2) (Zep-2)	ZNF644 KIAA1221 ZEP2	1327	regulation of transcription by RNA polymerase II [GO:0006357]	nucleus [GO:0005634]	DNA-binding transcription factor activity, RNA polymerase II-specific [GO:0000981]; metal ion binding [GO:0046872]; RNA polymerase II cis-regulatory region sequence-specific DNA binding [GO:0000978]; transcription corepressor binding [GO:0001222]	29|23	52	26	2	2|2|2|3|3|3|6|3|2|2	1	1	1	1	1	17.81	9.29	0	Tan	40 / 716	2.2	10	40	TRUE	IntAct	pubmed:35140242|imex:IM-28767	intact-miscore:0.27
NFIC	BioID	P08651	Q9H582	Prey	P08651_Q9H582	ZNF644	Zinc finger protein 644 (Zinc finger motif enhancer-binding protein 2) (Zep-2)	ZNF644 KIAA1221 ZEP2	1327	regulation of transcription by RNA polymerase II [GO:0006357]	nucleus [GO:0005634]	DNA-binding transcription factor activity, RNA polymerase II-specific [GO:0000981]; metal ion binding [GO:0046872]; RNA polymerase II cis-regulatory region sequence-specific DNA binding [GO:0000978]; transcription corepressor binding [GO:0001222]	7|11	18	9	2	0|0|0|0|0|0|0|0|0|0|0|0|0|0|0|0|0|0|0|0|0|0|0|0|0|0|2|3|0|0|1|3|0|0|0|0|0|0|0|0|1|0|0|0	1	1	1	1	1	4.95	39.6	0	Helka	40 / 716	2.2	10	40	TRUE	IntAct	pubmed:35140242|imex:IM-28767	intact-miscore:0.27
NFIC	BioID	P08651	Q9H9B1	Prey	P08651_Q9H9B1	EHMT1	Histone-lysine N-methyltransferase EHMT1 (EC 2.1.1.-) (EC 2.1.1.367) (Euchromatic histone-lysine N-methyltransferase 1) (Eu-HMTase1) (G9a-like protein 1) (GLP) (GLP1) (Histone H3-K9 methyltransferase 5) (H3-K9-HMTase 5) (Lysine N-methyltransferase 1D)	EHMT1 EUHMTASE1 GLP KIAA1876 KMT1D	1298	chromatin organization [GO:0006325]; DNA methylation [GO:0006306]; facultative heterochromatin formation [GO:0140718]; negative regulation of DNA-templated transcription [GO:0045892]; negative regulation of transcription by RNA polymerase II [GO:0000122]; peptidyl-lysine dimethylation [GO:0018027]; peptidyl-lysine monomethylation [GO:0018026]; positive regulation of cold-induced thermogenesis [GO…	chromatin [GO:0000785]; nuclear body [GO:0016604]; nucleoplasm [GO:0005654]; nucleus [GO:0005634]	C2H2 zinc finger domain binding [GO:0070742]; histone H3K27 methyltransferase activity [GO:0046976]; histone H3K9 methyltransferase activity [GO:0046974]; histone H3K9me2 methyltransferase activity [GO:0140947]; methyltransferase activity [GO:0008168]; p53 binding [GO:0002039]; protein-lysine N-methyltransferase activity [GO:0016279]; transcription corepressor binding [GO:0001222]; zinc ion bindi…	38|37	75	37.5	2	11|8|6|12|8|2|9|11|7|8	1	1	1	1	1	24.82	4.57	0	Tan	82 / 716	3.1	26	82	TRUE	IntAct	pubmed:35140242|imex:IM-28767	intact-miscore:0.27
NFIC	BioID	P08651	Q9H9B1	Prey	P08651_Q9H9B1	EHMT1	Histone-lysine N-methyltransferase EHMT1 (EC 2.1.1.-) (EC 2.1.1.367) (Euchromatic histone-lysine N-methyltransferase 1) (Eu-HMTase1) (G9a-like protein 1) (GLP) (GLP1) (Histone H3-K9 methyltransferase 5) (H3-K9-HMTase 5) (Lysine N-methyltransferase 1D)	EHMT1 EUHMTASE1 GLP KIAA1876 KMT1D	1298	chromatin organization [GO:0006325]; DNA methylation [GO:0006306]; facultative heterochromatin formation [GO:0140718]; negative regulation of DNA-templated transcription [GO:0045892]; negative regulation of transcription by RNA polymerase II [GO:0000122]; peptidyl-lysine dimethylation [GO:0018027]; peptidyl-lysine monomethylation [GO:0018026]; positive regulation of cold-induced thermogenesis [GO…	chromatin [GO:0000785]; nuclear body [GO:0016604]; nucleoplasm [GO:0005654]; nucleus [GO:0005634]	C2H2 zinc finger domain binding [GO:0070742]; histone H3K27 methyltransferase activity [GO:0046976]; histone H3K9 methyltransferase activity [GO:0046974]; histone H3K9me2 methyltransferase activity [GO:0140947]; methyltransferase activity [GO:0008168]; p53 binding [GO:0002039]; protein-lysine N-methyltransferase activity [GO:0016279]; transcription corepressor binding [GO:0001222]; zinc ion bindi…	10|13	23	11.5	2	7|6|1|0|4|0|9|1|8|4|0|0|0|0|0|0|0|0|0|0|0|0|0|0|1|0|6|9|1|0|5|10|0|0|0|0|1|0|0|0|0|2|0|0	0.87	0.91	0.87	0.91	0.87	1.6	6.75	0.03	Helka	82 / 716	3.1	26	82	TRUE	IntAct	pubmed:35140242|imex:IM-28767	intact-miscore:0.27
NFIC	BioID	P08651	Q9HAH7	Prey	P08651_Q9HAH7	FBRS	Probable fibrosin-1	FBRS FBS FBS1	460				2|2	4	2	2	1|0|0|0|0|0|0|0|1|0|0|0|0|0|0|0|0|0|0|0|0|0|0|0|0|0|1|1|0|0|1|1|0|0|0|0|0|0|0|0|0|0|0|0	0.9	0.9	0.9	0.9	0.9	2.21	14.67	0.03	Helka	5 / 716	1.2	2	5	TRUE	IntAct	pubmed:35140242|imex:IM-28767	intact-miscore:0.27
NFIC	BioID	P08651	Q9HCM7	Prey	P08651_Q9HCM7	FBRSL1	Fibrosin-1-like protein (AUTS2-like protein) (HBV X-transactivated gene 9 protein) (HBV XAg-transactivated protein 9)	FBRSL1 AUTS2L KIAA1545 XTP9	1045			RNA binding [GO:0003723]	2|2	4	2	2	0|1|0|0|0|0|2|0|0|0|0|0|0|0|0|0|0|0|0|0|0|0|0|0|0|0|0|0|0|0|0|0|0|0|0|0|0|0|0|0|0|0|0|0	0.95	0.95	0.95	0.95	0.95	2.98	20	0.01	Helka	6 / 716	1.3	3	6	TRUE	IntAct	pubmed:35140242|imex:IM-28767	intact-miscore:0.27
NFIC	BioID	P08651	Q9NP66	Prey	P08651_Q9NP66	HMG20A	High mobility group protein 20A (HMG box-containing protein 20A) (HMG domain-containing protein 1) (HMG domain-containing protein HMGX1)	HMG20A HMGX1 HMGXB1	347	chromatin organization [GO:0006325]; negative regulation of neuron differentiation [GO:0045665]; negative regulation of protein sumoylation [GO:0033234]; negative regulation of transcription by RNA polymerase II [GO:0000122]; regulation of DNA-templated transcription [GO:0006355]; regulation of gene expression [GO:0010468]	nucleus [GO:0005634]	DNA binding [GO:0003677]; identical protein binding [GO:0042802]	6|7	13	6.5	2	2|2|2|1|3|1|2|3|2|2|0|0|0|0|0|0|0|0|0|0|0|0|0|0|0|0|2|2|0|0|0|2|0|0|0|0|0|1|0|0|1|1|0|0	0.98	0.99	0.98	0.99	0.98	3.62	9.86	0	Helka	27 / 716	2.6	6	27	TRUE	IntAct	pubmed:35140242|imex:IM-28767	intact-miscore:0.27
NFIC	BioID	P08651	Q9NQB0	Prey	P08651_Q9NQB0	TCF7L2	Transcription factor 7-like 2 (HMG box transcription factor 4) (T-cell-specific transcription factor 4) (T-cell factor 4) (TCF-4) (hTCF-4)	TCF7L2 TCF4	619	blood vessel development [GO:0001568]; canonical Wnt signaling pathway [GO:0060070]; canonical Wnt signaling pathway involved in positive regulation of epithelial to mesenchymal transition [GO:0044334]; fat cell differentiation [GO:0045444]; glucose homeostasis [GO:0042593]; maintenance of DNA repeat elements [GO:0043570]; myoblast fate commitment [GO:0048625]; negative regulation of canonical Wn…	beta-catenin-TCF complex [GO:1990907]; beta-catenin-TCF7L2 complex [GO:0070369]; catenin-TCF7L2 complex [GO:0071664]; chromatin [GO:0000785]; nucleoplasm [GO:0005654]; nucleus [GO:0005634]; PML body [GO:0016605]; protein-DNA complex [GO:0032993]	armadillo repeat domain binding [GO:0070016]; beta-catenin binding [GO:0008013]; DNA-binding transcription factor activity [GO:0003700]; DNA-binding transcription factor activity, RNA polymerase II-specific [GO:0000981]; gamma-catenin binding [GO:0045295]; nuclear receptor binding [GO:0016922]; promoter-specific chromatin binding [GO:1990841]; protein kinase binding [GO:0019901]; RNA polymerase I…	8|8	16	8	2	2|0|2|2|0|0|0|0|0|0	1	1	1	1	1	5.98	13.33	0	Tan	16 / 716	1.2	2	16	TRUE	IntAct	pubmed:35140242|imex:IM-28767	intact-miscore:0.27
NFIC	BioID	P08651	Q9NQB0	Prey	P08651_Q9NQB0	TCF7L2	Transcription factor 7-like 2 (HMG box transcription factor 4) (T-cell-specific transcription factor 4) (T-cell factor 4) (TCF-4) (hTCF-4)	TCF7L2 TCF4	619	blood vessel development [GO:0001568]; canonical Wnt signaling pathway [GO:0060070]; canonical Wnt signaling pathway involved in positive regulation of epithelial to mesenchymal transition [GO:0044334]; fat cell differentiation [GO:0045444]; glucose homeostasis [GO:0042593]; maintenance of DNA repeat elements [GO:0043570]; myoblast fate commitment [GO:0048625]; negative regulation of canonical Wn…	beta-catenin-TCF complex [GO:1990907]; beta-catenin-TCF7L2 complex [GO:0070369]; catenin-TCF7L2 complex [GO:0071664]; chromatin [GO:0000785]; nucleoplasm [GO:0005654]; nucleus [GO:0005634]; PML body [GO:0016605]; protein-DNA complex [GO:0032993]	armadillo repeat domain binding [GO:0070016]; beta-catenin binding [GO:0008013]; DNA-binding transcription factor activity [GO:0003700]; DNA-binding transcription factor activity, RNA polymerase II-specific [GO:0000981]; gamma-catenin binding [GO:0045295]; nuclear receptor binding [GO:0016922]; promoter-specific chromatin binding [GO:1990841]; protein kinase binding [GO:0019901]; RNA polymerase I…	2|2	4	2	2	2|0|0|0|0|0|0|0|0|0|0|0|0|0|0|0|0|0|0|0|0|0|0|0|0|0|0|0|0|0|0|0|0|0|0|0|0|0|0|0|0|0|0|0	0.94	0.94	0.94	0.94	0.94	2.76	20	0.02	Helka	16 / 716	1.2	2	16	TRUE	IntAct	pubmed:35140242|imex:IM-28767	intact-miscore:0.27
NFIC	BioID	P08651	Q9P2K3	Prey	P08651_Q9P2K3	RCOR3	REST corepressor 3	RCOR3 KIAA1343	495	negative regulation of DNA-templated transcription [GO:0045892]; regulation of transcription by RNA polymerase II [GO:0006357]	cytosol [GO:0005829]; histone deacetylase complex [GO:0000118]; nucleoplasm [GO:0005654]; transcription regulator complex [GO:0005667]	transcription corepressor activity [GO:0003714]	10|14	24	12	2	9|10|9|7|10|6|11|4|9|8|0|0|0|0|0|0|0|0|0|0|0|0|0|0|0|0|4|5|0|0|2|3|0|0|0|0|0|0|0|0|6|5|0|0	0.78	0.86	0.78	0.86	0.78	0.84	4.89	0.05	Helka	42 / 716	2.5	10	42	TRUE	IntAct	pubmed:35140242|imex:IM-28767	intact-miscore:0.27
NFIC	BioID	P08651	Q9UHF7	Prey	P08651_Q9UHF7	TRPS1	Zinc finger transcription factor Trps1 (Tricho-rhino-phalangeal syndrome type I protein) (Zinc finger protein GC79)	TRPS1	1281	negative regulation of transcription by RNA polymerase II [GO:0000122]; regulation of chondrocyte differentiation [GO:0032330]; regulation of transcription by RNA polymerase II [GO:0006357]; skeletal system development [GO:0001501]	chromatin [GO:0000785]; nucleoplasm [GO:0005654]; nucleus [GO:0005634]; protein-containing complex [GO:0032991]	DNA-binding transcription factor activity [GO:0003700]; DNA-binding transcription repressor activity, RNA polymerase II-specific [GO:0001227]; protein domain specific binding [GO:0019904]; RNA polymerase II transcription regulatory region sequence-specific DNA binding [GO:0000977]; zinc ion binding [GO:0008270]	36|37	73	36.5	2	5|1|3|5|1|0|2|1|5|2	1	1	1	1	1	26.76	14.6	0	Tan	28 / 716	1.3	5	28	TRUE	IntAct	pubmed:35140242|imex:IM-28767	intact-miscore:0.27
NFIC	BioID	P08651	Q9UHF7	Prey	P08651_Q9UHF7	TRPS1	Zinc finger transcription factor Trps1 (Tricho-rhino-phalangeal syndrome type I protein) (Zinc finger protein GC79)	TRPS1	1281	negative regulation of transcription by RNA polymerase II [GO:0000122]; regulation of chondrocyte differentiation [GO:0032330]; regulation of transcription by RNA polymerase II [GO:0006357]; skeletal system development [GO:0001501]	chromatin [GO:0000785]; nucleoplasm [GO:0005654]; nucleus [GO:0005634]; protein-containing complex [GO:0032991]	DNA-binding transcription factor activity [GO:0003700]; DNA-binding transcription repressor activity, RNA polymerase II-specific [GO:0001227]; protein domain specific binding [GO:0019904]; RNA polymerase II transcription regulatory region sequence-specific DNA binding [GO:0000977]; zinc ion binding [GO:0008270]	9|13	22	11	2	0|0|3|0|1|0|0|0|0|0|0|1|0|1|0|0|0|0|0|0|0|0|0|0|0|0|6|7|0|1|2|4|0|0|0|0|0|0|0|0|0|0|0|0	0.98	0.99	0.98	0.99	0.98	3.32	18.62	0	Helka	28 / 716	1.3	5	28	TRUE	IntAct	pubmed:35140242|imex:IM-28767	intact-miscore:0.27
NFIC	BioID	P08651	Q9UIU6	Prey	P08651_Q9UIU6	SIX4	Homeobox protein SIX4 (Sine oculis homeobox homolog 4)	SIX4	781	anatomical structure morphogenesis [GO:0009653]; embryonic cranial skeleton morphogenesis [GO:0048701]; fungiform papilla morphogenesis [GO:0061197]; generation of neurons [GO:0048699]; inner ear morphogenesis [GO:0042472]; male gonad development [GO:0008584]; male sex determination [GO:0030238]; male sex differentiation [GO:0046661]; metanephric mesenchyme development [GO:0072075]; myoblast migr…	chromatin [GO:0000785]; cytoplasm [GO:0005737]; nucleus [GO:0005634]; transcription regulator complex [GO:0005667]	DNA-binding transcription activator activity, RNA polymerase II-specific [GO:0001228]; DNA-binding transcription factor activity, RNA polymerase II-specific [GO:0000981]; RNA polymerase II cis-regulatory region sequence-specific DNA binding [GO:0000978]; sequence-specific double-stranded DNA binding [GO:1990837]	5|7	12	6	2	3|0|3|3|1|0|1|1|0|0	0.9	0.97	0.9	0.97	0.9	1.55	5	0.02	Tan	38 / 716	1.7	6	38	TRUE	IntAct	pubmed:35140242|imex:IM-28767	intact-miscore:0.27
NFIC	BioID	P08651	Q9UIU6	Prey	P08651_Q9UIU6	SIX4	Homeobox protein SIX4 (Sine oculis homeobox homolog 4)	SIX4	781	anatomical structure morphogenesis [GO:0009653]; embryonic cranial skeleton morphogenesis [GO:0048701]; fungiform papilla morphogenesis [GO:0061197]; generation of neurons [GO:0048699]; inner ear morphogenesis [GO:0042472]; male gonad development [GO:0008584]; male sex determination [GO:0030238]; male sex differentiation [GO:0046661]; metanephric mesenchyme development [GO:0072075]; myoblast migr…	chromatin [GO:0000785]; cytoplasm [GO:0005737]; nucleus [GO:0005634]; transcription regulator complex [GO:0005667]	DNA-binding transcription activator activity, RNA polymerase II-specific [GO:0001228]; DNA-binding transcription factor activity, RNA polymerase II-specific [GO:0000981]; RNA polymerase II cis-regulatory region sequence-specific DNA binding [GO:0000978]; sequence-specific double-stranded DNA binding [GO:1990837]	3|2	5	2.5	2	2|4|0|0|0|0|1|0|1|1|0|0|0|0|0|0|0|0|0|0|0|0|0|0|0|0|1|0|0|0|0|1|0|0|0|0|0|0|0|0|0|0|0|0	0.8	0.87	0.8	0.87	0.8	0.94	10	0.05	Helka	38 / 716	1.7	6	38	TRUE	IntAct	pubmed:35140242|imex:IM-28767	intact-miscore:0.27
NFIC	BioID	P08651	Q9UKY1	Prey	P08651_Q9UKY1	ZHX1	Zinc fingers and homeoboxes protein 1	ZHX1	873	cell differentiation [GO:0030154]; negative regulation of DNA-templated transcription [GO:0045892]; negative regulation of transcription by RNA polymerase II [GO:0000122]; regulation of transcription by RNA polymerase II [GO:0006357]	chromatin [GO:0000785]; nucleoplasm [GO:0005654]; nucleus [GO:0005634]	DNA binding [GO:0003677]; DNA-binding transcription factor activity [GO:0003700]; DNA-binding transcription factor activity, RNA polymerase II-specific [GO:0000981]; metal ion binding [GO:0046872]; protein heterodimerization activity [GO:0046982]	2|3	5	2.5	2	1|0|0|0|0|0|2|1|1|0|0|0|0|0|0|0|0|0|0|0|0|0|0|0|0|0|0|0|0|0|0|1|0|0|0|0|0|0|0|0|0|0|0|0	0.94	0.98	0.94	0.98	0.94	2.22	18.33	0.01	Helka	4 / 716	1	1	4	TRUE	IntAct	pubmed:35140242|imex:IM-28767	intact-miscore:0.27
NFIC	BioID	P08651	Q9ULD9	Prey	P08651_Q9ULD9	ZNF608	Zinc finger protein 608 (Renal carcinoma antigen NY-REN-36)	ZNF608 KIAA1281	1512	negative regulation of transcription by RNA polymerase II [GO:0000122]; regulation of transcription by RNA polymerase II [GO:0006357]	nucleus [GO:0005634]	metal ion binding [GO:0046872]	6|5	11	5.5	2	2|1|0|0|0|1|2|0|2|1|0|0|0|0|0|0|0|0|0|0|0|0|0|0|0|1|2|2|0|0|2|1|0|0|0|0|0|0|0|0|1|0|0|0	0.99	1	0.99	1	0.99	4.12	13.44	0	Helka	8 / 716	1	1	8	TRUE	IntAct	pubmed:35140242|imex:IM-28767	intact-miscore:0.27
NFIC	BioID	P08651	Q9ULL5	Prey	P08651_Q9ULL5	PRR12	Proline-rich protein 12	PRR12 KIAA1205	2036		neuron projection [GO:0043005]; nucleus [GO:0005634]; postsynaptic density [GO:0014069]		34|40	74	37	2	2|0|1|1|3|1|0|2|1|0	1	1	1	1	1	41.56	33.64	0	Tan	22 / 716	1.6	6	22	TRUE	IntAct	pubmed:35140242|imex:IM-28767	intact-miscore:0.27
NFIC	BioID	P08651	Q9ULL5	Prey	P08651_Q9ULL5	PRR12	Proline-rich protein 12	PRR12 KIAA1205	2036		neuron projection [GO:0043005]; nucleus [GO:0005634]; postsynaptic density [GO:0014069]		5|7	12	6	2	0|0|0|0|0|0|0|0|0|0|0|0|0|0|0|0|0|0|0|0|0|0|0|0|0|0|1|1|0|0|2|0|0|0|0|0|0|0|1|0|0|0|0|0	1	1	1	1	1	7.11	52.8	0	Helka	22 / 716	1.6	6	22	TRUE	IntAct	pubmed:35140242|imex:IM-28767	intact-miscore:0.27
NFIC	BioID	P08651	Q9UPW6	Prey	P08651_Q9UPW6	SATB2	DNA-binding protein SATB2 (Special AT-rich sequence-binding protein 2)	SATB2 KIAA1034	733	cartilage development [GO:0051216]; cellular response to organic substance [GO:0071310]; chromatin remodeling [GO:0006338]; embryonic pattern specification [GO:0009880]; embryonic skeletal system morphogenesis [GO:0048704]; negative regulation of transcription by RNA polymerase II [GO:0000122]; neuron migration [GO:0001764]; osteoblast development [GO:0002076]; positive regulation of transcriptio…	chromatin [GO:0000785]; histone deacetylase complex [GO:0000118]; nuclear matrix [GO:0016363]; nucleoplasm [GO:0005654]; transcription regulator complex [GO:0005667]	chromatin binding [GO:0003682]; DNA-binding transcription activator activity, RNA polymerase II-specific [GO:0001228]; DNA-binding transcription factor activity, RNA polymerase II-specific [GO:0000981]; histone deacetylase binding [GO:0042826]; RNA polymerase II cis-regulatory region sequence-specific DNA binding [GO:0000978]; RNA polymerase II transcription regulatory region sequence-specific DN…	8|6	14	7	2	0|5|3|2|4|2|0|0|7|3|0|0|0|0|0|0|0|0|0|0|0|0|0|0|0|2|4|2|0|0|0|0|0|0|0|0|2|1|0|0|0|3|0|0	0.87	0.92	0.87	0.92	0.87	1.51	7.7	0.03	Helka	28 / 716	2.9	14	28	TRUE	IntAct	pubmed:35140242|imex:IM-28767	intact-miscore:0.27
NFIC	BioID	P08651	Q9UQR1	Prey	P08651_Q9UQR1	ZNF148	Zinc finger protein 148 (Transcription factor ZBP-89) (Zinc finger DNA-binding protein 89)	ZNF148 ZBP89	794	cellular defense response [GO:0006968]; gamete generation [GO:0007276]; negative regulation of DNA-templated transcription [GO:0045892]; negative regulation of gene expression [GO:0010629]; negative regulation of transcription by RNA polymerase II [GO:0000122]; positive regulation of transcription by RNA polymerase II [GO:0045944]; regulation of transcription by RNA polymerase II [GO:0006357]; su…	Golgi apparatus [GO:0005794]; nucleoplasm [GO:0005654]	DNA-binding transcription factor activity [GO:0003700]; DNA-binding transcription repressor activity, RNA polymerase II-specific [GO:0001227]; metal ion binding [GO:0046872]; RNA polymerase II cis-regulatory region sequence-specific DNA binding [GO:0000978]; sequence-specific DNA binding [GO:0043565]	6|4	10	5	2	0|2|1|0|0|0|1|1|1|1|0|0|0|0|1|0|0|0|0|0|0|0|0|0|0|0|2|1|0|0|1|4|0|0|0|0|0|0|0|0|0|1|0|0	0.95	0.99	0.95	0.99	0.95	2.41	12.94	0.01	Helka	111 / 716	7.2	38	111	TRUE	IntAct	pubmed:35140242|imex:IM-28767	intact-miscore:0.27
NFIC	BioID	P08651	Q9Y2X9	Prey	P08651_Q9Y2X9	ZNF281	Zinc finger protein 281 (GC-box-binding zinc finger protein 1) (Transcription factor ZBP-99) (Zinc finger DNA-binding protein 99)	ZNF281 GZP1 ZBP99	895	embryonic body morphogenesis [GO:0010172]; negative regulation of DNA-templated transcription [GO:0045892]; negative regulation of gene expression [GO:0010629]; negative regulation of transcription by RNA polymerase II [GO:0000122]; positive regulation of DNA-templated transcription [GO:0045893]; regulation of DNA-templated transcription [GO:0006355]; stem cell differentiation [GO:0048863]	nucleoplasm [GO:0005654]; nucleus [GO:0005634]	DNA-binding transcription factor activity [GO:0003700]; DNA-binding transcription factor activity, RNA polymerase II-specific [GO:0000981]; DNA-binding transcription repressor activity, RNA polymerase II-specific [GO:0001227]; metal ion binding [GO:0046872]; RNA polymerase II cis-regulatory region sequence-specific DNA binding [GO:0000978]; sequence-specific DNA binding [GO:0043565]; sequence-spe…	11|12	23	11.5	2	8|5|3|3|4|5|4|3|6|3|0|0|0|0|0|0|1|0|0|1|1|0|0|0|0|0|8|6|0|0|4|7|0|0|0|0|1|0|0|0|3|1|0|0	0.91	0.92	0.91	0.92	0.91	2.1	6.57	0.02	Helka	107 / 716	6.9	30	107	TRUE	IntAct	pubmed:35140242|imex:IM-28767	intact-miscore:0.27
[truncated: 34,358 more rows]

## Sheet: 22Rv1 TF PPI info.
Bait	Methods	Prey	Protein names	Gene Names	Spec	SpecSum	AvgSpec	NumReplicates	ctrlCounts	AvgP	MaxP	TopoAvgP	TopoMaxP	SaintScore	logOddsScore	FoldChange	BFDR	From	Gene.Names..primary.	Protein.names	Gene.Names	Length	Gene.Ontology..biological.process.	Gene.Ontology..cellular.component.	Gene.Ontology..molecular.function.	Mapped.Gene.Symbol	Num.of.Expt...found.total.	Ave.SC	Max.SC	found	total	%Crapome	crapomeIF
[truncated: 250 more rows]

## Sheet: Sheet1
USF1	USF2
USF1	BCKDK
USF1	AHCYL1
USF1	DBT
USF1	PIP
USF1	BCKDHA
USF1	SKI
USF1	GYS1
USF1	BCKDHB
USF1	HOXA9
USF1	CASP14
USF1	MTHFR
USF1	ALDH5A1
USF1	UBE2M
USF1	CRYZ
USF1	TRIP6
USF1	ZNF326
USF1	POGZ
USF1	ZBTB33
USF1	RFX6
USF1	CPVL
USF1	RMI1
USF1	PCMTD2
USF1	SMARCAL1
USF1	UBE2I
USF1	DDX56
USF1	EED

## Sheet: Sheet2
USF1	USF1
USF2	293T
BCKDK	293T
AHCYL1	293T
DBT	293T
PIP	293T
BCKDHA	293T
SKI	293T
GYS1	293T
BCKDHB	293T
HOXA9	293T
CASP14	293T
MTHFR	293T
ALDH5A1	293T
UBE2M	293T
CRYZ	293T
TRIP6	293T
ZNF326	293T
POGZ	293T
ZBTB33	293T
RFX6	293T
CPVL	293T
RMI1	293T
PCMTD2	293T
SMARCAL1	293T
UBE2I	22Rv1
DDX56	22Rv1
EED	22Rv1
